# Supplementary material for: Photosynthetic sea slugs induce protective changes to the light reactions of the chloroplasts they steal from algae
Source: eLife. 2020 Oct 20;9:e57389. doi: 10.7554/eLife.57389 (PMC7679141; doi:10.7554/eLife.57389)
Supplement: Figure 2—source data 1. [file elife-57389-fig2-data1.xlsx]

## Sheet: Fig 2A timida
			Original data (arbitrary units)									Zero level set									Normalized to max							Averaged data (shown in Fig. 2A)								Maxima
Time (s)	E timida 1	E timida 2	E timida 3	E timida 4	E timida 5	E timida 6	E timida 7		Time (s)	E timida 1	E timida 2	E timida 3	E timida 4	E timida 5	E timida 6	E timida 7		Time (s)	E timida 1	E timida 2	E timida 3	E timida 4	E timida 5	E timida 6	E timida 7		Time (s)	Average	stdev	SE	n		max1	max2	max3	max4	max5	max6	max7
0.000208	-0.78149	-0.79147	-0.77353	-0.78644	-0.81015	-0.81134	-0.79587		0.000208	-0.00382	0.002245	0.00103	0.0003425	0.003525	-4.5e-05	-2.75e-05		0.000208	-0.0645707	0.0470206	0.0205589	0.0067805	0.077396	-0.000907716	-0.000643538		0.000208	0.0122334	0.0443334	0.0167565	7		0.05916	0.047745	0.0501	0.0505125	0.045545	0.049575	0.0427325
0.000408	-0.77719	-0.79633	-0.77582	-0.78561	-0.81436	-0.81052	-0.79559		0.000408	0.00048	-0.002615	-0.00126	0.0011725	-0.000685	0.000775	0.0002525		0.000408	0.00811359	-0.0547701	-0.0251497	0.0232121	-0.0150401	0.0156329	0.00590885		0.000408	-0.00601322	0.0273535	0.0103387
0.000608	-0.77939	-0.79211	-0.77591	-0.78763	-0.81958	-0.81436	-0.79687		0.000608	-0.00172	0.001605	-0.00135	-0.0008475	-0.005905	-0.003065	-0.0010275		0.000608	-0.0290737	0.0336161	-0.0269461	-0.016778	-0.129652	-0.0618255	-0.0240449		0.000608	-0.0363863	0.0498754	0.0188511
0.000808	-0.77261	-0.79495	-0.77298	-0.78745	-0.81061	-0.80896	-0.79504		0.000808	0.00506	-0.001235	0.00158	-0.0006675	0.003065	0.002335	0.0008025		0.000808	0.0855308	-0.0258666	0.0315369	-0.0132146	0.0672961	0.0471004	0.0187796		0.000808	0.0301661	0.0405868	0.0153404
0.0011858	-0.71851	-0.74597	-0.72446	-0.73627	-0.76813	-0.76172	-0.75311		0.0011858	0.05916	0.047745	0.0501	0.0505125	0.045545	0.049575	0.0427325		0.0011858	1	1	1	1	1	1	1		0.0011858	1	0	0
0.0012451	-0.73013	-0.7587	-0.73206	-0.74432	-0.78049	-0.76657	-0.76227		0.0012451	0.04754	0.035015	0.0425	0.0424625	0.033185	0.044725	0.0335725		0.0012451	0.803584	0.733375	0.848303	0.840634	0.72862	0.902168	0.785643		0.0012451	0.806047	0.0631396	0.0238645
0.0013242	-0.73425	-0.76456	-0.73599	-0.75211	-0.78836	-0.77792	-0.7695		0.0013242	0.04342	0.029155	0.03857	0.0346725	0.025315	0.033375	0.0263425		0.0013242	0.733942	0.61064	0.76986	0.686414	0.555824	0.673222	0.616451		0.0013242	0.663765	0.0747168	0.0282403
0.0014297	-0.73691	-0.763	-0.74332	-0.74753	-0.79056	-0.77902	-0.77472		0.0014297	0.04076	0.030715	0.03124	0.0392525	0.023115	0.032275	0.0211225		0.0014297	0.688979	0.643313	0.623553	0.777085	0.50752	0.651034	0.494296		0.0014297	0.62654	0.0992529	0.0375141
0.0015703	-0.74176	-0.76721	-0.74149	-0.75659	-0.79028	-0.78598	-0.76987		0.0015703	0.03591	0.026505	0.03307	0.0301925	0.023395	0.025315	0.0259725		0.0015703	0.606998	0.555137	0.66008	0.597723	0.513668	0.51064	0.607793		0.0015703	0.578863	0.0548453	0.0207296
0.0017579	-0.74707	-0.78186	-0.75403	-0.75595	-0.80173	-0.78809	-0.77472		0.0017579	0.0306	0.011855	0.02053	0.0308325	0.011945	0.023205	0.0211225		0.0017579	0.517241	0.248298	0.40978	0.610393	0.262268	0.468079	0.494296		0.0017579	0.430051	0.133726	0.0505435
0.002008	-0.7554	-0.76859	-0.75247	-0.76337	-0.79807	-0.79404	-0.78543		0.002008	0.02227	0.025125	0.02209	0.0234125	0.015605	0.017255	0.0104125		0.002008	0.376437	0.526233	0.440918	0.463499	0.342628	0.348058	0.243667		0.002008	0.391634	0.0932166	0.0352326
0.0023415	-0.75613	-0.78067	-0.75275	-0.76437	-0.80292	-0.79156	-0.78488		0.0023415	0.02154	0.013045	0.02181	0.0224125	0.010755	0.019735	0.0109625		0.0023415	0.364097	0.273222	0.435329	0.443702	0.23614	0.398084	0.256538		0.0023415	0.343873	0.0874674	0.0330596
0.0027863	-0.75623	-0.77353	-0.75989	-0.76831	-0.79779	-0.80173	-0.78314		0.0027863	0.02144	0.020185	0.01467	0.0184725	0.015885	0.009565	0.0127025		0.0027863	0.362407	0.422767	0.292814	0.365702	0.348776	0.19294	0.297256		0.0027863	0.326095	0.0735036	0.0277817
0.0033794	-0.76007	-0.7782	-0.75595	-0.76932	-0.7988	-0.80219	-0.78506		0.0033794	0.0176	0.015515	0.01861	0.0174625	0.014875	0.009105	0.0107825		0.0033794	0.297498	0.324955	0.371457	0.345707	0.3266	0.183661	0.252326		0.0033794	0.300315	0.0636903	0.0240727
0.0041703	-0.76758	-0.78168	-0.76144	-0.76529	-0.80109	-0.80045	-0.78745		0.0041703	0.01009	0.012035	0.01312	0.0214925	0.012585	0.010845	0.0083925		0.0041703	0.170554	0.252068	0.261876	0.425489	0.27632	0.218759	0.196396		0.0041703	0.257352	0.0830832	0.0314025
0.005225	-0.76364	-0.78516	-0.75714	-0.76675	-0.80145	-0.80017	-0.78616		0.005225	0.01403	0.008555	0.01742	0.0200325	0.012225	0.011125	0.0096825		0.005225	0.237153	0.179181	0.347705	0.396585	0.268416	0.224407	0.226584		0.005225	0.268576	0.0767471	0.0290077
0.0066314	-0.76172	-0.78287	-0.76218	-0.76584	-0.80621	-0.80182	-0.79001		0.0066314	0.01595	0.010845	0.01238	0.0209425	0.007465	0.009475	0.0058325		0.0066314	0.269608	0.227144	0.247106	0.4146	0.163904	0.191125	0.136489		0.0066314	0.235711	0.0915996	0.0346214
0.0085069	-0.76639	-0.78442	-0.7608	-0.7673	-0.81207	-0.80301	-0.79102		0.0085069	0.01128	0.009295	0.01376	0.0194825	0.001605	0.008285	0.0048225		0.0085069	0.190669	0.19468	0.274651	0.385697	0.0352399	0.167121	0.112853		0.0085069	0.194416	0.112379	0.0424754
0.011008	-0.76447	-0.78397	-0.75595	-0.78094	-0.80283	-0.79697	-0.78992		0.011008	0.0132	0.009745	0.01861	0.0058425	0.010845	0.014325	0.0059225		0.011008	0.223124	0.204105	0.371457	0.115664	0.238116	0.288956	0.138595		0.011008	0.225717	0.0871481	0.0329389
0.0143432	-0.75266	-0.78159	-0.75833	-0.77307	-0.80154	-0.79706	-0.78561		0.0143432	0.02501	0.012125	0.01623	0.0137125	0.012135	0.014235	0.0102325		0.0143432	0.422752	0.253953	0.323952	0.271467	0.26644	0.287141	0.239455		0.0143432	0.295023	0.0623967	0.0235837
0.0187908	-0.76291	-0.78159	-0.76492	-0.7749	-0.80246	-0.80118	-0.79028		0.0187908	0.01476	0.012125	0.00964	0.0118825	0.011215	0.010115	0.0055625		0.0187908	0.249493	0.253953	0.192415	0.235239	0.24624	0.204034	0.13017		0.0187908	0.215935	0.0445589	0.0168417
0.0247217	-0.76236	-0.78168	-0.75421	-0.77518	-0.79889	-0.79834	-0.78873		0.0247217	0.01531	0.012035	0.02035	0.0116025	0.014785	0.012955	0.0071125		0.0247217	0.25879	0.252068	0.406188	0.229696	0.324624	0.261321	0.166442		0.0247217	0.271304	0.0757079	0.0286149
0.0326308	-0.77097	-0.78497	-0.7662	-0.76904	-0.80273	-0.8063	-0.78781		0.0326308	0.0067	0.008745	0.00836	0.0177425	0.010945	0.004995	0.0080325		0.0326308	0.113252	0.183161	0.166866	0.35125	0.240312	0.100756	0.187972		0.0326308	0.191938	0.0846041	0.0319774
0.0431777	-0.76456	-0.78708	-0.75613	-0.77142	-0.8075	-0.80182	-0.79138		0.0431777	0.01311	0.006635	0.01843	0.0153625	0.006175	0.009475	0.0044625		0.0431777	0.221602	0.138967	0.367864	0.304133	0.13558	0.191125	0.104429		0.0431777	0.2091	0.0966062	0.0365137
0.0572421	-0.76025	-0.78149	-0.75888	-0.78021	-0.80502	-0.80557	-0.78076		0.0572421	0.01742	0.012225	0.01568	0.0065725	0.008655	0.005725	0.0150825		0.0572421	0.294456	0.256048	0.312974	0.130116	0.190032	0.115482	0.352952		0.0572421	0.236008	0.0924398	0.034939
0.0759974	-0.76016	-0.77637	-0.76328	-0.77701	-0.80667	-0.80045	-0.78186		0.0759974	0.01751	0.017345	0.01128	0.0097725	0.007005	0.010845	0.0139825		0.0759974	0.295977	0.363284	0.22515	0.193467	0.153804	0.218759	0.32721		0.0759974	0.25395	0.0762042	0.0288025
0.101008	-0.76053	-0.78021	-0.75531	-0.7684	-0.802	-0.79733	-0.78845		0.101008	0.01714	0.013505	0.01925	0.0183825	0.011675	0.013965	0.0073925		0.101008	0.289723	0.282857	0.384232	0.36392	0.25634	0.281694	0.172995		0.101008	0.290251	0.0698649	0.0264064
0.13436	-0.76089	-0.78296	-0.75513	-0.77316	-0.80063	-0.80008	-0.78168		0.13436	0.01678	0.010755	0.01943	0.0136225	0.013045	0.011215	0.0141625		0.13436	0.283638	0.225259	0.387824	0.269686	0.28642	0.226223	0.331422		0.13436	0.28721	0.0576712	0.0217977
0.178836	-0.75558	-0.78149	-0.76712	-0.78406	-0.80612	-0.80347	-0.79028		0.178836	0.02209	0.012225	0.00744	0.0027225	0.007555	0.007825	0.0055625		0.178836	0.373394	0.256048	0.148503	0.0538976	0.16588	0.157842	0.13017		0.178836	0.183676	0.102597	0.0387781
0.238145	-0.76382	-0.78314	-0.76254	-0.78214	-0.80383	-0.79935	-0.78955		0.238145	0.01385	0.010575	0.01202	0.0046425	0.009845	0.011945	0.0062925		0.238145	0.234111	0.221489	0.23992	0.0919079	0.21616	0.240948	0.147253		0.238145	0.198827	0.0571742	0.0216098
0.317236	-0.76831	-0.78717	-0.7652	-0.77573	-0.80484	-0.8063	-0.79047		0.317236	0.00936	0.006545	0.00936	0.0110525	0.008835	0.004995	0.0053725		0.317236	0.158215	0.137082	0.186826	0.218807	0.193984	0.100756	0.125724		0.317236	0.160199	0.0419238	0.0158457
0.422704	-0.76208	-0.78433	-0.76282	-0.77811	-0.79807	-0.80118	-0.78845		0.422704	0.01559	0.009385	0.01174	0.0086725	0.015605	0.010115	0.0073925		0.422704	0.263523	0.196565	0.234331	0.17169	0.342628	0.204034	0.172995		0.422704	0.226538	0.0608077	0.0229832
0.563349	-0.76392	-0.78296	-0.77234	-0.776	-0.80145	-0.79742	-0.79376		0.563349	0.01375	0.010755	0.00222	0.0107825	0.012225	0.013875	0.0020825		0.563349	0.232421	0.225259	0.0443114	0.213462	0.268416	0.279879	0.0487334		0.563349	0.187497	0.0991279	0.0374668
0.750902	-0.76538	-0.78305	-0.76419	-0.77399	-0.80521	-0.79623	-0.7836		0.750902	0.01229	0.010665	0.01037	0.0127925	0.008465	0.015065	0.0122425		0.750902	0.207742	0.223374	0.206986	0.253254	0.18586	0.303883	0.286492		0.750902	0.238227	0.0442234	0.0167149
1.00101	-0.75714	-0.78296	-0.76254	-0.77545	-0.79843	-0.80045	-0.7933		1.00101	0.02053	0.010755	0.01202	0.0113325	0.015245	0.010845	0.0025425		1.00101	0.347025	0.225259	0.23992	0.22435	0.334724	0.218759	0.059498		1.00101	0.235648	0.0946826	0.0357866
1.33453	-0.7641	-0.79514	-0.76831	-0.77756	-0.80347	-0.80594	-0.78918		1.33453	0.01357	-0.001425	0.00625	0.0092225	0.010205	0.005355	0.0066625		1.33453	0.229378	-0.0298461	0.12475	0.182579	0.224064	0.108018	0.155912		1.33453	0.142122	0.0886875	0.0335207
1.77929	-0.76904	-0.79221	-0.77005	-0.77609	-0.81262	-0.80402	-0.78836		1.77929	0.00863	0.001505	0.00451	0.0106925	0.001055	0.007275	0.0074825		1.77929	0.145876	0.0315216	0.09002	0.21168	0.0231639	0.146747	0.175101		1.77929	0.11773	0.0717574	0.0271217
2.37238	-0.76584	-0.7901	-0.77225	-0.77747	-0.80603	-0.80411	-0.79587		2.37238	0.01183	0.003615	0.00231	0.0093125	0.007645	0.007185	-2.75e-05		2.37238	0.199966	0.0757147	0.0461078	0.18436	0.167856	0.144932	-0.000643538		2.37238	0.116899	0.0767653	0.0290145
3.16329	-0.76181	-0.78397	-0.77499	-0.78131	-0.80804	-0.79926	-0.78104		3.16329	0.01586	0.009745	-0.00043	0.0054725	0.005635	0.012035	0.0148025		3.16329	0.268087	0.204105	-0.00858283	0.10834	0.123724	0.242763	0.346399		3.16329	0.183548	0.118142	0.0446536
4.21797	-0.76456	-0.77994	-0.77042	-0.78149	-0.80942	-0.80374	-0.78845		4.21797	0.01311	0.013775	0.00414	0.0052925	0.004255	0.007555	0.0073925		4.21797	0.221602	0.288512	0.0826347	0.104776	0.0934241	0.152395	0.172995		4.21797	0.159477	0.0752799	0.0284531
5.62442	-0.76712	-0.78076	-0.76996	-0.77783	-0.80768	-0.80511	-0.79715		5.62442	0.01055	0.012955	0.0046	0.0089525	0.005995	0.006185	-0.0013075		5.62442	0.17833	0.271337	0.0918164	0.177233	0.131628	0.12476	-0.0305973		5.62442	0.13493	0.0927833	0.0350688
7.49995	-0.76117	-0.78818	-0.77609	-0.7825	-0.81161	-0.81592	-0.7998		7.49995	0.0165	0.005535	-0.00153	0.0042825	0.002065	-0.004625	-0.0039575		7.49995	0.278905	0.115928	-0.0305389	0.084781	0.0453398	-0.093293	-0.092611		7.49995	0.044073	0.132342	0.0500206
10.001	-0.76556	-0.78809	-0.77655	-0.79175	-0.80695	-0.80347	-0.79166		10.001	0.01211	0.005625	-0.00199	-0.0049675	0.006725	0.007825	0.0041825		10.001	0.204699	0.117813	-0.0397206	-0.098342	0.147656	0.157842	0.0978763		10.001	0.0839749	0.111029	0.0419649
13.3362	-0.76437	-0.78333	-0.77582	-0.78937	-0.81079	-0.8107	-0.78799		13.3362	0.0133	0.010385	-0.00126	-0.0025875	0.002885	0.000595	0.0078525		13.3362	0.224814	0.21751	-0.0251497	-0.0512249	0.0633439	0.012002	0.183759		13.3362	0.0892935	0.11777	0.044513
17.7838	-0.76593	-0.78122	-0.78067	-0.79349	-0.80649	-0.80914	-0.79404		17.7838	0.01174	0.012495	-0.00611	-0.0067075	0.007185	0.002155	0.0018025		17.7838	0.198445	0.261703	-0.121956	-0.132789	0.157756	0.0434695	0.042181		17.7838	0.0641156	0.152837	0.057767
23.7147	-0.7674	-0.78461	-0.78177	-0.78799	-0.81619	-0.81354	-0.78983		23.7147	0.01027	0.009105	-0.00721	-0.0012075	-0.002515	-0.002245	0.0060125		23.7147	0.173597	0.190701	-0.143912	-0.023905	-0.0552201	-0.0452849	0.140701		23.7147	0.0338109	0.132085	0.0499236
31.6238	-0.76465	-0.79056	-0.78131	-0.78259	-0.8129	-0.81281	-0.7934		31.6238	0.01302	0.003155	-0.00675	0.0041925	0.000775	-0.001515	0.0024425		31.6238	0.220081	0.0660802	-0.134731	0.0829993	0.0170161	-0.0305598	0.0571579		31.6238	0.0397206	0.109003	0.0411992
42.1707	-0.76666	-0.79257	-0.78534	-0.78644	-0.8118	-0.80411	-0.79944		42.1707	0.01101	0.001145	-0.01078	0.0003425	0.001875	0.007185	-0.0035975		42.1707	0.186105	0.0239816	-0.21517	0.0067805	0.0411681	0.144932	-0.0841865		42.1707	0.0148016	0.135283	0.051132
56.2351	-0.77197	-0.78122	-0.78836	-0.79733	-0.80823	-0.80786	-0.79623		56.2351	0.0057	0.012495	-0.0138	-0.0105475	0.005445	0.003435	-0.0003875		56.2351	0.0963489	0.261703	-0.275449	-0.20881	0.119552	0.069289	-0.00906804		56.2351	0.00765227	0.189742	0.0717156
74.9904	-0.7673	-0.78616	-0.78232	-0.80475	-0.80804	-0.80594	-0.78735		74.9904	0.01037	0.007555	-0.00776	-0.0179675	0.005635	0.005355	0.0084925		74.9904	0.175287	0.158236	-0.15489	-0.355704	0.123724	0.108018	0.198736		74.9904	0.0362011	0.209594	0.0792192
100.001	-0.77362	-0.78406	-0.78873	-0.80429	-0.81573	-0.80731	-0.7825		100.001	0.00405	0.009655	-0.01417	-0.0175075	-0.002055	0.003985	0.0133425		100.001	0.0684584	0.20222	-0.282834	-0.346597	-0.0451202	0.0803833	0.312233		100.001	-0.00160815	0.2421	0.091505

## Sheet:  Fig 2A Acetabularia
		Original data (arbitrary units)							Zero level set							Normalized to maximum						Averaged data (shown in Fig. 2A)							Maxima
Time (s)	Acetabularia 1	Acetabularia 2	Acetabularia 3	Acetabularia 4	Acetabularia 5		Time (s)	Acetabularia 1	Acetabularia 2	Acetabularia 3	Acetabularia 4	Acetabularia 5		Time (s)	Acetabularia 1	Acetabularia 2	Acetabularia 3	Acetabularia 4	Acetabularia 5		Time (s)	Average	stdev	SE	n		max1	max2	max3	max4	max5
0.000208	-0.60233	-0.70148	-0.70486	-0.67914	-0.68802		0.000208	0.000475	-0.004075	-0.0052375	0.0005475	-0.005015		0.000208	0.00484768	-0.0736291	-0.0547555	0.00493432	-0.0453006		0.000208	-0.0327806	0.0358697	0.0160414	5		0.097985	0.055345	0.0956525	0.110958	0.110705
0.000408	-0.60406	-0.69434	-0.69855	-0.68436	-0.68326		0.000408	-0.001255	0.003065	0.0010725	-0.0046725	-0.000255		0.000408	-0.0128081	0.0553799	0.0112125	-0.0421107	-0.00230342		0.000408	0.00187403	0.0357692	0.0159965
0.000608	-0.60324	-0.6937	-0.69983	-0.68005	-0.67712		0.000608	-0.000435	0.003705	-0.0002075	-0.0003625	0.005885		0.000608	-0.00443946	0.0669437	-0.00216931	-0.00326702	0.0531593		0.000608	0.0220454	0.0350444	0.0156724
0.000808	-0.60159	-0.7001	-0.69525	-0.6752	-0.68362		0.000808	0.001215	-0.002695	0.0043725	0.0044875	-0.000615		0.000808	0.0123999	-0.0486946	0.0457123	0.0404434	-0.0055553		0.000808	0.00886115	0.0383682	0.0171588
0.0011858	-0.50482	-0.64206	-0.60397	-0.56873	-0.5723		0.0011858	0.097985	0.055345	0.0956525	0.110958	0.110705		0.0011858	1	1	1	1	1		0.0011858	1	0	0
0.0012451	-0.51993	-0.64709	-0.62585	-0.58731	-0.58914		0.0012451	0.082875	0.050315	0.0737725	0.0923775	0.093865		0.0012451	0.845793	0.909116	0.771255	0.832548	0.847884		0.0012451	0.841319	0.0491053	0.0219606
0.0013242	-0.52872	-0.65167	-0.62906	-0.60278	-0.59299		0.0013242	0.074085	0.045735	0.0705625	0.0769075	0.090015		0.0013242	0.756085	0.826362	0.737696	0.693126	0.813107		0.0013242	0.765275	0.0549319	0.0245663
0.0014297	-0.53366	-0.65808	-0.64069	-0.61642	-0.61066		0.0014297	0.069145	0.039325	0.0589325	0.0632675	0.072345		0.0014297	0.705669	0.710543	0.61611	0.570196	0.653494		0.0014297	0.651202	0.0597635	0.0267271
0.0015703	-0.5451	-0.65936	-0.65863	-0.62109	-0.621		0.0015703	0.057705	0.038045	0.0409925	0.0585975	0.062005		0.0015703	0.588917	0.687415	0.428556	0.528108	0.560092		0.0015703	0.558618	0.0940157	0.0420451
0.0017579	-0.55746	-0.67429	-0.65863	-0.6243	-0.62238		0.0017579	0.045345	0.023115	0.0409925	0.0553875	0.060625		0.0017579	0.462775	0.417653	0.428556	0.499178	0.547627		0.0017579	0.471158	0.0533397	0.0238542
0.002008	-0.55765	-0.68042	-0.66394	-0.63446	-0.63657		0.002008	0.045155	0.016985	0.0356825	0.0452275	0.046435		0.002008	0.460836	0.306893	0.373043	0.407611	0.419448		0.002008	0.393566	0.0577186	0.0258126
0.0023415	-0.56277	-0.66504	-0.66879	-0.64224	-0.63629		0.0023415	0.040035	0.032365	0.0308325	0.0374475	0.046715		0.0023415	0.408583	0.584786	0.322339	0.337494	0.421977		0.0023415	0.415036	0.104296	0.0466425
0.0027863	-0.56808	-0.68097	-0.67694	-0.64343	-0.6351		0.0027863	0.034725	0.016435	0.0226825	0.0362575	0.047905		0.0027863	0.354391	0.296955	0.237134	0.326769	0.432727		0.0027863	0.329595	0.0722379	0.0323058
0.0033794	-0.57935	-0.67328	-0.67703	-0.6459	-0.63776		0.0033794	0.023455	0.024125	0.0225925	0.0337875	0.045245		0.0033794	0.239373	0.435902	0.236194	0.304508	0.408699		0.0033794	0.324935	0.0934654	0.041799
0.0041703	-0.5723	-0.68546	-0.67355	-0.64792	-0.63922		0.0041703	0.030505	0.011945	0.0260725	0.0317675	0.043785		0.0041703	0.311323	0.215828	0.272575	0.286303	0.395511		0.0041703	0.296308	0.0655877	0.0293317
0.005225	-0.56918	-0.67676	-0.6731	-0.6557	-0.64105		0.005225	0.033625	0.020645	0.0265225	0.0239875	0.041955		0.005225	0.343165	0.373024	0.27728	0.216186	0.37898		0.005225	0.317727	0.0696478	0.0311474
0.0066314	-0.57632	-0.68729	-0.68024	-0.64728	-0.64343		0.0066314	0.026485	0.010115	0.0193825	0.0324075	0.039575		0.0066314	0.270296	0.182763	0.202635	0.292071	0.357482		0.0066314	0.261049	0.0705127	0.0315342
0.0085069	-0.58127	-0.68619	-0.67465	-0.66138	-0.64563		0.0085069	0.021535	0.011215	0.0249725	0.0183075	0.037375		0.0085069	0.219779	0.202638	0.261075	0.164996	0.337609		0.0085069	0.237219	0.0658853	0.0294648
0.011008	-0.56992	-0.68326	-0.673	-0.65131	-0.64636		0.011008	0.032885	0.014145	0.0266225	0.0283775	0.036645		0.011008	0.335613	0.255579	0.278325	0.255751	0.331015		0.011008	0.291256	0.0395252	0.0176762
0.0143432	-0.58145	-0.68262	-0.68152	-0.64774	-0.6395		0.0143432	0.021355	0.014785	0.0181025	0.0319475	0.043505		0.0143432	0.217942	0.267142	0.189253	0.287926	0.392981		0.0143432	0.271049	0.0785471	0.0351273
0.0187908	-0.58026	-0.68317	-0.67776	-0.65057	-0.6459		0.0187908	0.022545	0.014235	0.0218625	0.0291175	0.037105		0.0187908	0.230086	0.257205	0.228562	0.26242	0.33517		0.0187908	0.262689	0.0433338	0.0193795
0.0247217	-0.5787	-0.68381	-0.67529	-0.6524	-0.647		0.0247217	0.024105	0.013595	0.0243325	0.0272875	0.036005		0.0247217	0.246007	0.245641	0.254384	0.245927	0.325234		0.0247217	0.263439	0.0347414	0.0155368
0.0326308	-0.57202	-0.68463	-0.68115	-0.65405	-0.64362		0.0326308	0.030785	0.012775	0.0184725	0.0256375	0.039385		0.0326308	0.314181	0.230825	0.193121	0.231057	0.355765		0.0326308	0.26499	0.0673494	0.0301196
0.0431777	-0.5722	-0.67859	-0.68756	-0.65607	-0.64975		0.0431777	0.030605	0.018815	0.0120625	0.0236175	0.033255		0.0431777	0.312344	0.339958	0.126108	0.212852	0.300393		0.0431777	0.258331	0.0878934	0.0393071
0.0572421	-0.57458	-0.68591	-0.67886	-0.64948	-0.65707		0.0572421	0.028225	0.011495	0.0207625	0.0302075	0.025935		0.0572421	0.288054	0.207697	0.217062	0.272244	0.234271		0.0572421	0.243866	0.0349164	0.0156151
0.0759974	-0.58328	-0.68198	-0.68234	-0.65799	-0.64929		0.0759974	0.019525	0.015425	0.0172825	0.0216975	0.033715		0.0759974	0.199265	0.278706	0.18068	0.195548	0.304548		0.0759974	0.23175	0.0558535	0.0249784
0.101008	-0.58136	-0.68976	-0.68033	-0.66074	-0.65213		0.101008	0.021445	0.007645	0.0192925	0.0189475	0.030875		0.101008	0.21886	0.138134	0.201694	0.170764	0.278894		0.101008	0.201669	0.0530358	0.0237183
0.13436	-0.58337	-0.67923	-0.68216	-0.659	-0.6524		0.13436	0.019435	0.018175	0.0174625	0.0206875	0.030605		0.13436	0.198347	0.328395	0.182562	0.186445	0.276455		0.13436	0.234441	0.0649814	0.0290606
0.178836	-0.58063	-0.68436	-0.67941	-0.66193	-0.65222		0.178836	0.022175	0.013045	0.0202125	0.0177575	0.030785		0.178836	0.22631	0.235703	0.211312	0.160039	0.278081		0.178836	0.222289	0.0427332	0.0191109
0.238145	-0.58163	-0.68976	-0.68161	-0.65982	-0.6503		0.238145	0.021175	0.007645	0.0180125	0.0198675	0.032705		0.238145	0.216105	0.138134	0.188312	0.179055	0.295425		0.238145	0.203406	0.0585449	0.0261821
0.317236	-0.58493	-0.68005	-0.68317	-0.66394	-0.65121		0.317236	0.017875	0.017355	0.0164525	0.0157475	0.031795		0.317236	0.182426	0.313578	0.172003	0.141924	0.287205		0.317236	0.219427	0.0759658	0.0339729
0.422704	-0.58145	-0.68472	-0.68234	-0.65982	-0.65112		0.422704	0.021355	0.012685	0.0172825	0.0198675	0.031885		0.422704	0.217942	0.229199	0.18068	0.179055	0.288018		0.422704	0.218979	0.0445325	0.0199156
0.563349	-0.58466	-0.68069	-0.67868	-0.66641	-0.64636		0.563349	0.018145	0.016715	0.0209425	0.0132775	0.036645		0.563349	0.185181	0.302015	0.218944	0.119663	0.331015		0.563349	0.231363	0.0861482	0.0385266
0.750902	-0.58658	-0.68729	-0.69058	-0.66248	-0.6611		0.750902	0.016225	0.010115	0.0090425	0.0172075	0.021905		0.750902	0.165587	0.182763	0.0945349	0.155082	0.197868		0.750902	0.159167	0.039654	0.0177338
1.00101	-0.58685	-0.68491	-0.68555	-0.659	-0.65222		1.00101	0.015955	0.012495	0.0140725	0.0206875	0.030785		1.00101	0.162831	0.225766	0.147121	0.186445	0.278081		1.00101	0.200049	0.0527304	0.0235818
1.33453	-0.58813	-0.69205	-0.6817	-0.66861	-0.65314		1.33453	0.014675	0.005355	0.0179225	0.0110775	0.029865		1.33453	0.149768	0.0967567	0.187371	0.0998355	0.269771		1.33453	0.1607	0.071625	0.0320317
1.77929	-0.58813	-0.68912	-0.68655	-0.66147	-0.66028		1.77929	0.014675	0.008285	0.0130725	0.0182175	0.022725		1.77929	0.149768	0.149697	0.136667	0.164184	0.205275		1.77929	0.161118	0.0265349	0.0118668
2.37238	-0.59006	-0.68985	-0.69617	-0.6731	-0.66129		2.37238	0.012745	0.007555	0.0034525	0.0065875	0.021715		2.37238	0.130071	0.136507	0.0360942	0.0593696	0.196152		2.37238	0.111639	0.0643034	0.0287574
3.16329	-0.59372	-0.69196	-0.69205	-0.66037	-0.66083		3.16329	0.009085	0.005445	0.0075725	0.0193175	0.022175		3.16329	0.0927183	0.0983829	0.0791668	0.174098	0.200307		3.16329	0.128935	0.0544418	0.0243471
4.21797	-0.59225	-0.69241	-0.69241	-0.66614	-0.66705		4.21797	0.010555	0.004995	0.0072125	0.0135475	0.015955		4.21797	0.107721	0.0902521	0.0754032	0.122096	0.144122		4.21797	0.107919	0.0268378	0.0120022
5.62442	-0.59573	-0.68271	-0.69498	-0.66962	-0.67017		5.62442	0.007075	0.014695	0.0046425	0.0100675	0.012835		5.62442	0.0722049	0.265516	0.0485351	0.0907329	0.115939		5.62442	0.118586	0.0857754	0.0383599
7.49995	-0.59665	-0.69223	-0.69077	-0.68042	-0.66769		7.49995	0.006155	0.005175	0.0088525	-0.0007325	0.015315		7.49995	0.0628157	0.0935044	0.0925485	-0.00660163	0.138341		7.49995	0.0761215	0.0535336	0.023941
10.001	-0.59161	-0.69131	-0.69287	-0.67996	-0.66357		10.001	0.011195	0.006095	0.0067525	-0.0002725	0.019435		10.001	0.114252	0.110127	0.0705941	-0.0024559	0.175557		10.001	0.0936149	0.0655221	0.0293024
13.3362	-0.5983	-0.6936	-0.69891	-0.67383	-0.67209		13.3362	0.004505	0.003805	0.0007125	0.0058575	0.010915		13.3362	0.0459764	0.0687506	0.00744884	0.0527905	0.0985954		13.3362	0.0547123	0.0333041	0.014894
17.7838	-0.59454	-0.70203	-0.69461	-0.6806	-0.66431		17.7838	0.008265	-0.004625	0.0050125	-0.0009125	0.018695		17.7838	0.0843496	-0.0835667	0.0524032	-0.00822387	0.168872		17.7838	0.0427669	0.0952428	0.0425939
23.7147	-0.59143	-0.7012	-0.7045	-0.68124	-0.6731		23.7147	0.011375	-0.003795	-0.0048775	-0.0015525	0.009905		23.7147	0.116089	-0.0685699	-0.0509919	-0.0139918	0.089472		23.7147	0.0144015	0.0835803	0.0373783
31.6238	-0.59692	-0.70276	-0.70175	-0.68985	-0.67328		31.6238	0.005885	-0.005355	-0.0021275	-0.0101625	0.009725		31.6238	0.0600602	-0.0967567	-0.022242	-0.0915891	0.0878461		31.6238	-0.0125363	0.0848285	0.0379365
42.1707	-0.59601	-0.69946	-0.7002	-0.68298	-0.67456		42.1707	0.006795	-0.002055	-0.0005775	-0.0032925	0.008445		42.1707	0.0693473	-0.0371307	-0.00603748	-0.0296735	0.0762838		42.1707	0.0145579	0.0544616	0.024356
56.2351	-0.5983	-0.69974	-0.70386	-0.69104	-0.67886		56.2351	0.004505	-0.002335	-0.0042375	-0.0113525	0.004145		56.2351	0.0459764	-0.0421899	-0.044301	-0.102314	0.0374418		56.2351	-0.0210773	0.0622599	0.0278435
74.9904	-0.60141	-0.70129	-0.70587	-0.69443	-0.67831		74.9904	0.001395	-0.003885	-0.0062475	-0.0147425	0.004695		74.9904	0.0142369	-0.070196	-0.0653146	-0.132866	0.04241		74.9904	-0.042346	0.0705023	0.0315296
100.001	-0.60168	-0.70587	-0.70569	-0.6882	-0.68024		100.001	0.001125	-0.008465	-0.0060675	-0.0085125	0.002765		100.001	0.0114813	-0.15295	-0.0634327	-0.0767186	0.0249763		100.001	-0.0513287	0.0722591	0.0323153

## Sheet: Fig 2B timida
		Original data (arbitrary units)						Zero level set						Normalized to max					Averaged data (shown in Fig. 2B)						Maxima
Time (s)	E timida 1	E timida 2	E timida 3	E timida 4		Time (s)	E timida 1	E timida 2	E timida 3	E timida 4		Time (s)	E timida 1	E timida 2	E timida 3	E timida 4		Time (s)	Average	stdev	SE	n		max1	max2	max3	max4
0.000208	-0.79907	-0.75714	-0.76923	-0.74918		0.000208	-0.0035	0.00325	0.0023775	0.00201		0.000208	-0.0520988	0.0282978	0.0250666	0.0146662		0.000208	0.00398292	0.0378375	0.0189187	4		0.06718	0.11485	0.0948475	0.13705
0.000408	-0.7934	-0.75613	-0.77097	-0.74908		0.000408	0.00217	0.00426	0.0006375	0.00211		0.000408	0.0323013	0.0370919	0.00672132	0.0153958		0.000408	0.0228776	0.0142344	0.00711719
0.000608	-0.79138	-0.7663	-0.77252	-0.75613		0.000608	0.00419	-0.00591	-0.0009125	-0.00494		0.000608	0.0623698	-0.0514584	-0.00962071	-0.0360452		0.000608	-0.00868865	0.0504242	0.0252121
0.000808	-0.79843	-0.76199	-0.77371	-0.75037		0.000808	-0.00286	-0.0016	-0.0021025	0.00082		0.000808	-0.0425722	-0.0139312	-0.0221672	0.00598322		0.000808	-0.0181718	0.0201063	0.0100531
0.0013242	-0.72995	-0.64554	-0.67676	-0.61853		0.0013242	0.06562	0.11485	0.0948475	0.13266		0.0013242	0.976779	1	1	0.967968		0.0013242	0.986187	0.0163508	0.00817541
0.002008	-0.73242	-0.647	-0.67776	-0.61652		0.002008	0.06315	0.11339	0.0938475	0.13467		0.002008	0.940012	0.987288	0.989457	0.982634		0.002008	0.974848	0.0233976	0.0116988
0.0041703	-0.73563	-0.65295	-0.68115	-0.61414		0.0041703	0.05994	0.10744	0.0904575	0.13705		0.0041703	0.89223	0.935481	0.953715	1		0.0041703	0.945357	0.0446309	0.0223154
0.011008	-0.72839	-0.65396	-0.67987	-0.62384		0.011008	0.06718	0.10643	0.0917375	0.12735		0.011008	1	0.926687	0.967211	0.929223		0.011008	0.95578	0.0348222	0.0174111
0.0326308	-0.7326	-0.64966	-0.67841	-0.62604		0.0326308	0.06297	0.11073	0.0931975	0.12515		0.0326308	0.937333	0.964127	0.982604	0.91317		0.0326308	0.949308	0.0304278	0.0152139
0.101008	-0.73737	-0.65799	-0.6947	-0.64023		0.101008	0.0582	0.1024	0.0769075	0.11096		0.101008	0.866329	0.891598	0.810854	0.809632		0.101008	0.844603	0.040998	0.020499
0.317236	-0.74039	-0.67786	-0.70331	-0.65616		0.317236	0.05518	0.08253	0.0682975	0.09503		0.317236	0.821375	0.718589	0.720077	0.693397		0.317236	0.73836	0.0566816	0.0283408
1.00101	-0.75998	-0.70514	-0.73068	-0.70175		1.00101	0.03559	0.05525	0.0409275	0.04944		1.00101	0.529771	0.481062	0.431508	0.360744		1.00101	0.450771	0.0721904	0.0360952
3.16329	-0.77527	-0.73279	-0.75266	-0.73096		3.16329	0.0203	0.0276	0.0189475	0.02023		3.16329	0.302173	0.240313	0.199768	0.14761		3.16329	0.222466	0.0652951	0.0326475
10.001	-0.79422	-0.75201	-0.76529	-0.75339		10.001	0.00135	0.00838	0.0063175	-0.0022		10.001	0.0200953	0.0729647	0.0666069	-0.0160525		10.001	0.0359036	0.041895	0.0209475
31.6238	-0.78323	-0.74753	-0.78433	-0.77188		31.6238	0.01234	0.01286	-0.0127225	-0.02069		31.6238	0.183686	0.111972	-0.134136	-0.150967		31.6238	0.00263865	0.170327	0.0851635
100.001	-0.78726	-0.74579	-0.77216	-0.77985		100.001	0.00831	0.0146	-0.0005525	-0.02866		100.001	0.123698	0.127122	-0.00582514	-0.209121		100.001	0.00896849	0.158014	0.0790068

## Sheet: Fig 2B Acetabularia
		Original data (arbitrary units)							Zero level set							Normalized to maximum						Averaged data (shown in Fig. 2B)							Maxima
Time (s)	Acetabularia 1	Acetabularia 2	Acetabularia 3	Acetabularia 4	Acetabularia 5		Time (s)	Acetabularia 1	Acetabularia 2	Acetabularia 3	Acetabularia 4	Acetabularia 5		Time (s)	Acetabularia 1	Acetabularia 2	Acetabularia 3	Acetabularia 4	Acetabularia 5		Time (s)	Average	stdev	SE	n		max1	max2	max3	max4	max5
0.000208	-0.56204	-0.64105	-0.59656	-0.63318	-0.63583		0.000208	0.0040975	-0.00112	-0.001055	-0.0010075	-0.00265		0.000208	0.0121596	-0.00293455	-0.00226904	-0.00275942	-0.0118722		0.000208	-0.00153513	0.00863707	0.00386262	5		0.336977	0.38166	0.464955	0.365113	0.22321
0.000408	-0.56735	-0.64096	-0.59665	-0.63675	-0.62943		0.000408	-0.0012125	-0.00103	-0.001145	-0.0045775	0.00375		0.000408	-0.00359816	-0.00269874	-0.0024626	-0.0125372	0.0168003		0.000408	-0.000899283	0.0107434	0.00537171
0.000608	-0.56589	-0.64014	-0.59958	-0.63556	-0.62952		0.000608	0.0002475	-0.00021	-0.004075	-0.0033875	0.00366		0.000608	0.00073447	-0.000550228	-0.00876429	-0.00927796	0.0163971		0.000608	-0.000292179	0.0103944	0.0051972
0.000808	-0.56927	-0.63757	-0.58923	-0.6232	-0.63794		0.000808	-0.0031325	0.00236	0.006275	0.0089725	-0.00476		0.000808	-0.00929587	0.00618351	0.0134959	0.0245746	-0.0213252		0.000808	0.0027266	0.0182229	0.00911144
0.0013242	-0.22916	-0.25827	-0.13055	-0.26706	-0.40997		0.0013242	0.336977	0.38166	0.464955	0.365113	0.22321		0.0013242	1	1	1	1	1		0.0013242	1	0	0
0.002008	-0.2352	-0.26843	-0.14493	-0.26752	-0.41208		0.002008	0.330937	0.3715	0.450575	0.364653	0.2211		0.002008	0.982076	0.973379	0.969072	0.99874	0.990547		0.002008	0.982763	0.0121637	0.00608183
0.0041703	-0.2319	-0.26495	-0.14923	-0.27576	-0.41428		0.0041703	0.334237	0.37498	0.446275	0.356413	0.2189		0.0041703	0.991869	0.982498	0.959824	0.976172	0.980691		0.0041703	0.978211	0.0117612	0.00588058
0.011008	-0.2384	-0.27621	-0.14886	-0.27667	-0.4162		0.011008	0.327737	0.36372	0.446645	0.355502	0.21698		0.011008	0.97258	0.952995	0.96062	0.973679	0.972089		0.011008	0.966393	0.00917405	0.00458703
0.0326308	-0.24719	-0.28336	-0.16571	-0.28738	-0.42453		0.0326308	0.318947	0.35657	0.429795	0.344793	0.20865		0.0326308	0.946495	0.934261	0.92438	0.944346	0.93477		0.0326308	0.93685	0.00888468	0.00444234
0.101008	-0.26688	-0.3165	-0.20764	-0.31833	-0.44211		0.101008	0.299257	0.32343	0.387865	0.313843	0.19107		0.101008	0.888064	0.84743	0.834199	0.859578	0.85601		0.101008	0.857056	0.0199	0.00995
0.317236	-0.32858	-0.36804	-0.29984	-0.37436	-0.47443		0.317236	0.237557	0.27189	0.295665	0.257812	0.15875		0.317236	0.704965	0.712388	0.6359	0.706118	0.711214		0.317236	0.694117	0.0326995	0.0163497
1.00101	-0.42426	-0.48184	-0.42508	-0.48148	-0.53		1.00101	0.141877	0.15809	0.170425	0.150693	0.10318		1.00101	0.42103	0.414217	0.366541	0.412729	0.462255		1.00101	0.415354	0.0339958	0.0169979
3.16329	-0.51535	-0.57312	-0.53568	-0.56461	-0.58768		3.16329	0.0507875	0.06681	0.059825	0.0675625	0.0455		3.16329	0.150715	0.175051	0.128668	0.185046	0.203844		3.16329	0.168665	0.0294474	0.0147237
10.001	-0.56213	-0.62448	-0.58411	-0.61798	-0.62585		10.001	0.0040075	0.01545	0.011395	0.0141925	0.00733		10.001	0.0118925	0.0404811	0.0245077	0.0388716	0.032839		10.001	0.0297184	0.0117714	0.00588572
31.6238	-0.56763	-0.64417	-0.60196	-0.62997	-0.63007		31.6238	-0.0014925	-0.00424	-0.006455	0.0022025	0.00311		31.6238	-0.00442908	-0.0111094	-0.0138831	0.00603239	0.0139331		31.6238	-0.00189121	0.0117091	0.00585454
100.001	-0.5777	-0.64783	-0.60489	-0.64563	-0.63098		100.001	-0.0115625	-0.0079	-0.009385	-0.0134575	0.0022		100.001	-0.0343124	-0.0206991	-0.0201847	-0.0368585	0.00985619		100.001	-0.0204397	0.0185742	0.00928709

## Sheet: Fig 2C timida
		Original data (arbitrary units)							Zero level set							Normalized to maximum						Averaged data (shown in Fig. 2C)							Maxima
Time (s)	E timida 1	E timida 2	E timida 3	E timida 4	E timida 5		Time (s)	E timida 1	E timida 2	E timida 3	E timida 4	E timida 5		Time (s)	E timida 1	E timida 2	E timida 3	E timida 4	E timida 5		Time (s)	Average	stdev	SE	n		max1	max2	max3	max4	max5
0.000208	-0.77023	-0.79065	-0.78314	-0.81281	-0.77545		0.000208	-0.0007775	0.003135	0.0061375	-0.003985	0.004375		0.000208	-0.00972209	0.038903	0.068754	-0.0613502	0.0496849		0.000208	0.0172539	0.0526285	0.0235362	5		0.0799725	0.080585	0.0892675	0.064955	0.088055
0.000408	-0.76776	-0.79321	-0.79047	-0.80603	-0.77875		0.000408	0.0016925	0.000575	-0.0011925	0.002795	0.001075		0.000408	0.0211635	0.00713532	-0.0133587	0.0430298	0.0122083		0.000408	0.0140356	0.0205723	0.0092002
0.000608	-0.77087	-0.79202	-0.79047	-0.80539	-0.78159		0.000608	-0.0014175	0.001765	-0.0011925	0.003435	-0.001765		0.000608	-0.0177248	0.0219023	-0.0133587	0.0528828	-0.0200443		0.000608	0.00473145	0.0318542	0.0142456
0.000808	-0.76895	-0.79926	-0.79303	-0.81107	-0.78351		0.000808	0.0005025	-0.005475	-0.0037525	-0.002245	-0.003685		0.000808	0.00628341	-0.0679407	-0.0420366	-0.0345624	-0.0418488		0.000808	-0.036021	0.0268366	0.0120017
0.0011858	-0.68948	-0.71429	-0.70001	-0.74506	-0.69177		0.0011858	0.0799725	0.079495	0.0892675	0.063765	0.088055		0.0011858	1	0.986474	1	0.98168	1		0.0011858	0.993631	0.0088847	0.00397336
0.0012451	-0.7002	-0.72034	-0.7077	-0.74817	-0.69974		0.0012451	0.0692525	0.073445	0.0815775	0.060655	0.080085		0.0012451	0.865954	0.911398	0.913854	0.9338	0.909488		0.0012451	0.906899	0.0248772	0.0111254
0.0013242	-0.70239	-0.7132	-0.71201	-0.74387	-0.70276		0.0013242	0.0670625	0.080585	0.0772675	0.064955	0.077065		0.0013242	0.83857	1	0.865573	1	0.875192		0.0013242	0.915867	0.0779674	0.0348681
0.0014297	-0.69882	-0.72098	-0.70963	-0.75073	-0.69653		0.0014297	0.0706325	0.072805	0.0796475	0.058095	0.083295		0.0014297	0.88321	0.903456	0.892234	0.894388	0.945943		0.0014297	0.903846	0.0246091	0.0110055
0.0015703	-0.69836	-0.72601	-0.71347	-0.75247	-0.69617		0.0015703	0.0710925	0.067775	0.0758075	0.056355	0.083655		0.0015703	0.888962	0.841037	0.849217	0.867601	0.950031		0.0015703	0.87937	0.043595	0.0194963
0.0017579	-0.70386	-0.73004	-0.71494	-0.75137	-0.69873		0.0017579	0.0655925	0.063745	0.0743375	0.057455	0.081095		0.0017579	0.820188	0.791028	0.83275	0.884535	0.920958		0.0017579	0.849892	0.0521818	0.0233364
0.002008	-0.69992	-0.73563	-0.72153	-0.75824	-0.69974		0.002008	0.0695325	0.058155	0.0677475	0.050585	0.080085		0.002008	0.869455	0.72166	0.758927	0.77877	0.909488		0.002008	0.80766	0.0787292	0.0352088
0.0023415	-0.71091	-0.73764	-0.72308	-0.76611	-0.71054		0.0023415	0.0585425	0.056145	0.0661975	0.042715	0.069285		0.0023415	0.732033	0.696718	0.741563	0.657609	0.786838		0.0023415	0.722952	0.0486522	0.0217579
0.0027863	-0.70386	-0.73663	-0.72327	-0.7706	-0.70523		0.0027863	0.0655925	0.057155	0.0660075	0.038225	0.074595		0.0027863	0.820188	0.709251	0.739435	0.588484	0.847141		0.0027863	0.7409	0.102235	0.0457209
0.0033794	-0.70871	-0.7435	-0.7261	-0.76483	-0.70386		0.0033794	0.0607425	0.050285	0.0631775	0.043995	0.075965		0.0033794	0.759542	0.624	0.707732	0.677315	0.862699		0.0033794	0.726258	0.0907187	0.0405706
0.0041703	-0.71494	-0.74231	-0.72968	-0.76694	-0.70761		0.0041703	0.0545125	0.051475	0.0595975	0.041885	0.072215		0.0041703	0.681641	0.638767	0.667628	0.644831	0.820112		0.0041703	0.690596	0.0744361	0.0332889
0.005225	-0.7197	-0.74313	-0.73453	-0.77481	-0.71365		0.005225	0.0497525	0.050655	0.0547475	0.034015	0.066175		0.005225	0.62212	0.628591	0.613297	0.52367	0.751519		0.005225	0.627839	0.081229	0.0363267
0.0066314	-0.72253	-0.75137	-0.73114	-0.77847	-0.72235		0.0066314	0.0469225	0.042415	0.0581375	0.030355	0.057475		0.0066314	0.586733	0.526339	0.651273	0.467324	0.652717		0.0066314	0.576877	0.080529	0.0360137
0.0085069	-0.72116	-0.75311	-0.74277	-0.77618	-0.71539		0.0085069	0.0482925	0.040675	0.0465075	0.032645	0.064435		0.0085069	0.603864	0.504747	0.52099	0.502579	0.731759		0.0085069	0.572788	0.0980808	0.043863
0.011008	-0.7337	-0.75677	-0.74954	-0.78012	-0.72336		0.011008	0.0357525	0.037015	0.0397375	0.028705	0.056465		0.011008	0.44706	0.459329	0.445151	0.441921	0.641247		0.011008	0.486942	0.0865108	0.0386888
0.0143432	-0.7326	-0.74899	-0.74579	-0.77893	-0.73846		0.0143432	0.0368525	0.044795	0.0434875	0.029895	0.041365		0.0143432	0.460815	0.555873	0.487159	0.460242	0.469763		0.0143432	0.48677	0.040131	0.0179471
0.0187908	-0.73389	-0.75677	-0.75696	-0.78488	-0.73618		0.0187908	0.0355625	0.037015	0.0323175	0.023945	0.043645		0.0187908	0.444684	0.459329	0.36203	0.36864	0.495656		0.0187908	0.426068	0.0585111	0.026167
0.0247217	-0.73526	-0.76135	-0.75659	-0.7912	-0.7359		0.0247217	0.0341925	0.032435	0.0326875	0.017625	0.043925		0.0247217	0.427553	0.402494	0.366175	0.271342	0.498836		0.0247217	0.39328	0.0836739	0.0374201
0.0326308	-0.74112	-0.76392	-0.75037	-0.79294	-0.74405		0.0326308	0.0283325	0.029865	0.0389075	0.015885	0.035775		0.0326308	0.354278	0.370602	0.435853	0.244554	0.40628		0.0326308	0.362314	0.073044	0.0326663
0.0431777	-0.74689	-0.7674	-0.76556	-0.78571	-0.7446		0.0431777	0.0225625	0.026385	0.0237175	0.023115	0.035225		0.0431777	0.282128	0.327418	0.26569	0.355862	0.400034		0.0431777	0.326227	0.0546272	0.02443
0.0572421	-0.74222	-0.76611	-0.76465	-0.78323	-0.74231		0.0572421	0.0272325	0.027675	0.0246275	0.025595	0.037515		0.0572421	0.340523	0.343426	0.275884	0.394042	0.426041		0.0572421	0.355983	0.0573782	0.0256603
0.0759974	-0.7532	-0.76749	-0.76474	-0.77939	-0.74808		0.0759974	0.0162525	0.026295	0.0245375	0.029435	0.031745		0.0759974	0.203226	0.326301	0.274876	0.45316	0.360513		0.0759974	0.323615	0.0935676	0.0418447
0.101008	-0.75476	-0.7717	-0.76657	-0.78644	-0.75494		0.101008	0.0146925	0.022085	0.0227075	0.022385	0.024885		0.101008	0.183719	0.274058	0.254376	0.344623	0.282607		0.101008	0.267877	0.0579007	0.025894
0.13436	-0.75192	-0.76868	-0.76529	-0.79468	-0.75192		0.13436	0.0175325	0.025105	0.0239875	0.014145	0.027905		0.13436	0.219232	0.311534	0.268715	0.217766	0.316904		0.13436	0.26683	0.0479122	0.021427
0.178836	-0.75092	-0.77673	-0.77042	-0.78845	-0.76044		0.178836	0.0185325	0.017055	0.0188575	0.020375	0.019385		0.178836	0.231736	0.21164	0.211247	0.313679	0.220146		0.178836	0.23769	0.0432878	0.0193589
0.238145	-0.75659	-0.77463	-0.77399	-0.79202	-0.75604		0.238145	0.0128625	0.019155	0.0152875	0.016805	0.023785		0.238145	0.160837	0.237699	0.171255	0.258718	0.270115		0.238145	0.219725	0.0504972	0.022583
0.317236	-0.76062	-0.77692	-0.77115	-0.79385	-0.75467		0.317236	0.0088325	0.016865	0.0181275	0.014975	0.025155		0.317236	0.110444	0.209282	0.203069	0.230544	0.285674		0.317236	0.207803	0.063412	0.0283587
0.422704	-0.7576	-0.77417	-0.77225	-0.78873	-0.76025		0.422704	0.0118525	0.019615	0.0170275	0.020095	0.019575		0.422704	0.148207	0.243408	0.190747	0.309368	0.222304		0.422704	0.222807	0.0602296	0.0269355
0.563349	-0.76364	-0.77692	-0.77527	-0.79633	-0.76328		0.563349	0.0058125	0.016865	0.0140075	0.012495	0.016545		0.563349	0.0726812	0.209282	0.156916	0.192364	0.187894		0.563349	0.163827	0.0543485	0.0243054
0.750902	-0.75632	-0.78772	-0.78186	-0.80292	-0.76126		0.750902	0.0131325	0.006065	0.0074175	0.005905	0.018565		0.750902	0.164213	0.0752621	0.083093	0.0909091	0.210834		0.750902	0.124862	0.0597856	0.0267369
1.00101	-0.76199	-0.78278	-0.77902	-0.80228	-0.763		1.00101	0.0074625	0.011005	0.0102575	0.006545	0.016825		1.00101	0.0933133	0.136564	0.114907	0.100762	0.191074		1.00101	0.127324	0.0392614	0.0175582
1.33453	-0.76199	-0.77481	-0.77637	-0.80255	-0.77261		1.33453	0.0074625	0.018975	0.0129075	0.006275	0.007215		1.33453	0.0933133	0.235466	0.144593	0.0966053	0.0819374		1.33453	0.130383	0.0634554	0.0283781
1.77929	-0.76822	-0.78085	-0.77847	-0.80191	-0.76419		1.77929	0.0012325	0.012935	0.0108075	0.006915	0.015635		1.77929	0.0154115	0.160514	0.121069	0.106458	0.177559		1.77929	0.116202	0.0632566	0.0282892
2.37238	-0.76245	-0.77893	-0.78497	-0.80612	-0.77042		2.37238	0.0070025	0.014855	0.0043075	0.002705	0.009405		2.37238	0.0875613	0.18434	0.0482538	0.0416442	0.106808		2.37238	0.0937214	0.057446	0.0256906
3.16329	-0.76483	-0.77682	-0.77774	-0.80054	-0.77115		3.16329	0.0046225	0.016965	0.0115375	0.008285	0.008675		3.16329	0.0578011	0.210523	0.129246	0.12755	0.098518		3.16329	0.124728	0.0560253	0.0250553
4.21797	-0.77124	-0.78488	-0.78836	-0.81958	-0.77005		4.21797	-0.0017875	0.008905	0.0009175	-0.010755	0.009775		4.21797	-0.0223514	0.110504	0.0102781	-0.165576	0.11101		4.21797	0.00877302	0.114204	0.0510736
5.62442	-0.77133	-0.79129	-0.78442	-0.81335	-0.7684		5.62442	-0.0018775	0.002495	0.0048575	-0.004525	0.011425		5.62442	-0.0234768	0.0309611	0.0544151	-0.0696636	0.129748		5.62442	0.0243968	0.0761288	0.0340459
7.49995	-0.7674	-0.78589	-0.78616	-0.80777	-0.76685		7.49995	0.0020525	0.007895	0.0031175	0.001055	0.012975		7.49995	0.0256651	0.0979711	0.0349231	0.016242	0.147351		7.49995	0.0644305	0.0563391	0.0251956
10.001	-0.76877	-0.78323	-0.78671	-0.81161	-0.76776		10.001	0.0006825	0.010555	0.0025675	-0.002785	0.012065		10.001	0.00853418	0.13098	0.0287619	-0.0428758	0.137017		10.001	0.0524833	0.078891	0.0352811
13.3362	-0.76767	-0.78543	-0.78607	-0.81335	-0.76712		13.3362	0.0017825	0.008355	0.0032075	-0.004525	0.012705		13.3362	0.0222889	0.103679	0.0359313	-0.0696636	0.144285		13.3362	0.0473042	0.0821888	0.0367559
17.7838	-0.77087	-0.79395	-0.78415	-0.80997	-0.77216		17.7838	-0.0014175	-0.000165	0.0051275	-0.001145	0.007665		17.7838	-0.0177248	-0.00204753	0.0574397	-0.0176276	0.0870479		17.7838	0.0214175	0.0479901	0.0214618
23.7147	-0.77243	-0.7847	-0.78543	-0.81583	-0.77289		23.7147	-0.0029775	0.009085	0.0038475	-0.007005	0.006935		23.7147	-0.0372315	0.112738	0.0431008	-0.107844	0.0787576		23.7147	0.0179042	0.0896995	0.0401148
31.6238	-0.76895	-0.79037	-0.79852	-0.81601	-0.76373		31.6238	0.0005025	0.003415	-0.0092425	-0.007185	0.016095		31.6238	0.00628341	0.0423776	-0.103537	-0.110615	0.182783		31.6238	0.00345847	0.120562	0.053917
42.1707	-0.76273	-0.78854	-0.80017	-0.81363	-0.76529		42.1707	0.0067225	0.005245	-0.0108925	-0.004805	0.014535		42.1707	0.0840601	0.0650866	-0.122021	-0.0739743	0.165067		42.1707	0.0236438	0.118444	0.0529697
56.2351	-0.76245	-0.79568	-0.80356	-0.81482	-0.76538		56.2351	0.0070025	-0.001895	-0.0142825	-0.005995	0.014445		56.2351	0.0875613	-0.0235155	-0.159997	-0.0922947	0.164045		56.2351	-0.00484006	0.131464	0.0587924
74.9904	-0.75861	-0.77957	-0.78891	-0.81171	-0.76968		74.9904	0.0108425	0.014215	0.0003675	-0.002885	0.010145		74.9904	0.135578	0.176398	0.00411684	-0.0444154	0.115212		74.9904	0.0773778	0.0933064	0.0417279
100.001	-0.76245	-0.78772	-0.77737	-0.81097	-0.76749		100.001	0.0070025	0.006065	0.0119075	-0.002145	0.012335		100.001	0.0875613	0.0752621	0.133391	-0.0330229	0.140083		100.001	0.0806549	0.0694842	0.0310743

## Sheet: Fig 2C Acetabularia
		Original data (arbitrary units)							Zero level set							Normalized to maximum						Averaged data (shown in Fig. 2C)							Maxima
Time (s)	Acetabularia 1	Acetabularia 2	Acetabularia 3	Acetabularia 4	Acetabularia 5		Time (s)	Acetabularia 1	Acetabularia 2	Acetabularia 3	Acetabularia 4	Acetabularia 5		Time (s)	Acetabularia 1	Acetabularia 2	Acetabularia 3	Acetabularia 4	Acetabularia 5		Time (s)	Average	stdev	SE	n		max1	max2	max3	max4	max5
0.000208	-0.65378	-0.71494	-0.65359	-0.64059	-0.58438		0.000208	-0.004215	0.00352	-0.0029725	-0.0075725	0.0008475		0.000208	-0.0148178	0.0252692	-0.0119609	-0.0294641	0.0036341		0.000208	-0.00546791	0.0208147	0.00930864	5		0.284455	0.1393	0.248517	0.257007	0.233208
0.000408	-0.64636	-0.71594	-0.64874	-0.6254	-0.58319		0.000408	0.003205	0.00252	0.0018775	0.0076175	0.0020375		0.000408	0.0112672	0.0180905	0.0075548	0.0296392	0.00873685		0.000408	0.0150577	0.00911637	0.00407697
0.000608	-0.65469	-0.72363	-0.64471	-0.6329	-0.58658		0.000608	-0.005125	-0.00517	0.0059075	0.0001175	-0.0013525		0.000608	-0.0180169	-0.0371141	0.023771	0.000457185	-0.00579956		0.000608	-0.00734049	0.0225364	0.0100786
0.000808	-0.64343	-0.71933	-0.65543	-0.63318	-0.58676		0.000808	0.006135	-0.00087	-0.0048125	-0.0001625	-0.0015325		0.000808	0.0215676	-0.00624551	-0.0193648	-0.000632277	-0.0065714		0.000808	-0.00224929	0.0149787	0.00669869
0.0011858	-0.37665	-0.57916	-0.4021	-0.37692	-0.35202		0.0011858	0.272915	0.1393	0.248517	0.256098	0.233208		0.0011858	0.959431	1	1	0.996459	1		0.0011858	0.991178	0.0178132	0.00796629
0.0012451	-0.36511	-0.58603	-0.40878	-0.37601	-0.35751		0.0012451	0.284455	0.13243	0.241837	0.257007	0.227718		0.0012451	1	0.950682	0.973121	1	0.976459		0.0012451	0.980052	0.0207328	0.009272
0.0013242	-0.37527	-0.58356	-0.4173	-0.38113	-0.35944		0.0013242	0.274295	0.1349	0.233317	0.251887	0.225788		0.0013242	0.964283	0.968413	0.938837	0.980078	0.968183		0.0013242	0.963959	0.0152375	0.00681441
0.0014297	-0.38077	-0.58997	-0.41061	-0.39203	-0.36218		0.0014297	0.268795	0.12849	0.240007	0.240988	0.223048		0.0014297	0.944947	0.922398	0.965757	0.937667	0.956434		0.0014297	0.945441	0.0167723	0.00750082
0.0015703	-0.38058	-0.58694	-0.41409	-0.3902	-0.37546		0.0015703	0.268985	0.13152	0.236527	0.242818	0.209767		0.0015703	0.945615	0.944149	0.951754	0.944788	0.899489		0.0015703	0.937159	0.0212758	0.00951482
0.0017579	-0.38306	-0.59161	-0.42279	-0.39853	-0.37225		0.0017579	0.266505	0.12685	0.227827	0.234488	0.212977		0.0017579	0.936897	0.910625	0.916746	0.912376	0.913253		0.0017579	0.917979	0.0108076	0.00483332
0.002008	-0.39047	-0.59427	-0.41336	-0.39597	-0.37445		0.002008	0.259095	0.12419	0.237257	0.237048	0.210778		0.002008	0.910847	0.891529	0.954691	0.922337	0.90382		0.002008	0.916645	0.0240252	0.0107444
0.0023415	-0.40109	-0.59537	-0.43387	-0.40494	-0.37143		0.0023415	0.248475	0.12309	0.216747	0.228077	0.213798		0.0023415	0.873513	0.883632	0.872162	0.887435	0.916769		0.0023415	0.886702	0.0180235	0.00806035
0.0027863	-0.39981	-0.60306	-0.43048	-0.4183	-0.39038		0.0027863	0.249755	0.1154	0.220137	0.214718	0.194848		0.0027863	0.878012	0.828428	0.885803	0.835452	0.835511		0.0027863	0.852641	0.0270119	0.0120801
0.0033794	-0.41116	-0.60764	-0.44513	-0.414	-0.39093		0.0033794	0.238405	0.11082	0.205487	0.219018	0.194298		0.0033794	0.838111	0.795549	0.826853	0.852183	0.833153		0.0033794	0.82917	0.020983	0.0093839
0.0041703	-0.41464	-0.60974	-0.44769	-0.41739	-0.3978		0.0041703	0.234925	0.10872	0.202927	0.215628	0.187428		0.0041703	0.825878	0.780474	0.816552	0.838993	0.803694		0.0041703	0.813118	0.0223527	0.00999642
0.005225	-0.42545	-0.61652	-0.45374	-0.43158	-0.41226		0.005225	0.224115	0.10194	0.196877	0.201437	0.172967		0.005225	0.787875	0.731802	0.792208	0.783781	0.741689		0.005225	0.767471	0.0284219	0.0127107
0.0066314	-0.44431	-0.62054	-0.46802	-0.44403	-0.42233		0.0066314	0.205255	0.09792	0.182597	0.188988	0.162898		0.0066314	0.721573	0.702943	0.734747	0.735338	0.698509		0.0066314	0.718622	0.0173099	0.00774121
0.0085069	-0.45886	-0.63492	-0.48642	-0.45493	-0.4325		0.0085069	0.190705	0.08354	0.164197	0.178088	0.152728		0.0085069	0.670422	0.599713	0.660708	0.692927	0.6549		0.0085069	0.655734	0.0345069	0.0154319
0.011008	-0.47891	-0.64352	-0.49796	-0.47443	-0.4498		0.011008	0.170655	0.07494	0.152657	0.158587	0.135428		0.011008	0.599937	0.537976	0.614273	0.617054	0.580717		0.011008	0.589991	0.032452	0.014513
0.0143432	-0.49448	-0.65698	-0.51315	-0.48376	-0.4584		0.0143432	0.155085	0.06148	0.137467	0.149257	0.126828		0.0143432	0.5452	0.44135	0.55315	0.580752	0.54384		0.0143432	0.532858	0.0532735	0.0238247
0.0187908	-0.51224	-0.66714	-0.52066	-0.49438	-0.46637		0.0187908	0.137325	0.05132	0.129957	0.138638	0.118858		0.0187908	0.482765	0.368413	0.522931	0.53943	0.509664		0.0187908	0.484641	0.0682027	0.0305012
0.0247217	-0.52386	-0.6785	-0.53632	-0.5105	-0.47177		0.0247217	0.125705	0.03996	0.114297	0.122518	0.113457		0.0247217	0.441915	0.286863	0.459917	0.476708	0.486509		0.0247217	0.430382	0.0820052	0.0366738
0.0326308	-0.53156	-0.68124	-0.54227	-0.51315	-0.48688		0.0326308	0.118005	0.03722	0.108347	0.119868	0.0983475		0.0326308	0.414846	0.267193	0.435975	0.466397	0.421717		0.0326308	0.401226	0.0774999	0.034659
0.0431777	-0.53769	-0.68362	-0.54163	-0.517	-0.48761		0.0431777	0.111875	0.03484	0.108988	0.116017	0.0976175		0.0431777	0.393296	0.250108	0.438551	0.451417	0.418586		0.0431777	0.390391	0.0814345	0.0364186
0.0572421	-0.54877	-0.685	-0.54904	-0.52853	-0.49017		0.0572421	0.100795	0.03346	0.101577	0.104487	0.0950575		0.0572421	0.354344	0.240201	0.408734	0.406554	0.407609		0.0572421	0.363488	0.072684	0.0325053
0.0759974	-0.55737	-0.68692	-0.5582	-0.52725	-0.49896		0.0759974	0.092195	0.03154	0.0924175	0.105768	0.0862675		0.0759974	0.324111	0.226418	0.371875	0.411535	0.369917		0.0759974	0.340771	0.0710259	0.0317637
0.101008	-0.55142	-0.69113	-0.56003	-0.53192	-0.50665		0.101008	0.098145	0.02733	0.0905875	0.101098	0.0785775		0.101008	0.345028	0.196195	0.364512	0.393364	0.336942		0.101008	0.327208	0.0763951	0.0341649
0.13436	-0.56186	-0.69159	-0.56287	-0.53879	-0.49695		0.13436	0.087705	0.02687	0.0877475	0.0942275	0.0882775		0.13436	0.308326	0.192893	0.353084	0.366633	0.378536		0.13436	0.319895	0.0758091	0.0339029
0.178836	-0.57184	-0.68893	-0.57266	-0.54419	-0.50931		0.178836	0.077725	0.02953	0.0779575	0.0888275	0.0759175		0.178836	0.273242	0.211989	0.31369	0.345622	0.325536		0.178836	0.294016	0.0529242	0.0236684
0.238145	-0.57257	-0.70459	-0.57422	-0.54648	-0.5159		0.238145	0.076995	0.01387	0.0763975	0.0865375	0.0693275		0.238145	0.270676	0.0995693	0.307413	0.336712	0.297278		0.238145	0.26233	0.0940043	0.04204
0.317236	-0.57935	-0.69754	-0.57825	-0.55353	-0.517		0.317236	0.070215	0.02092	0.0723675	0.0794875	0.0682275		0.317236	0.24684	0.150179	0.291197	0.309281	0.292561		0.317236	0.258012	0.0645679	0.0288756
0.422704	-0.58566	-0.6969	-0.58466	-0.5614	-0.52762		0.422704	0.063905	0.02156	0.0659575	0.0716175	0.0576075		0.422704	0.224658	0.154774	0.265404	0.278659	0.247023		0.422704	0.234103	0.0487705	0.0218108
0.563349	-0.58868	-0.7001	-0.5928	-0.56689	-0.52853		0.563349	0.060885	0.01836	0.0578175	0.0661275	0.0566975		0.563349	0.214041	0.131802	0.23265	0.257298	0.24312		0.563349	0.215782	0.0495257	0.0221486
0.750902	-0.59006	-0.70752	-0.59161	-0.57266	-0.52478		0.750902	0.059505	0.01094	0.0590075	0.0603575	0.0604475		0.750902	0.20919	0.0785355	0.237438	0.234847	0.2592		0.750902	0.203842	0.072258	0.0323148
1.00101	-0.59509	-0.70377	-0.59802	-0.58218	-0.53357		1.00101	0.054475	0.01469	0.0525975	0.0508375	0.0516575		1.00101	0.191507	0.105456	0.211645	0.197806	0.221509		1.00101	0.185584	0.0462999	0.020706
1.33453	-0.61121	-0.70596	-0.60947	-0.58795	-0.53339		1.33453	0.038355	0.0125	0.0411475	0.0450675	0.0518375		1.33453	0.134837	0.0897344	0.165572	0.175355	0.222281		1.33453	0.157556	0.0492094	0.0220071
1.77929	-0.61597	-0.7056	-0.60873	-0.58942	-0.53384		1.77929	0.033595	0.01286	0.0418875	0.0435975	0.0513875		1.77929	0.118103	0.0923187	0.168549	0.169635	0.220351		1.77929	0.153791	0.0498787	0.0223064
2.37238	-0.6167	-0.71191	-0.62219	-0.59482	-0.54337		2.37238	0.032865	0.00655	0.0284275	0.0381975	0.0418575		2.37238	0.115537	0.0470208	0.114388	0.148624	0.179486		2.37238	0.121011	0.0493209	0.022057
3.16329	-0.62201	-0.7099	-0.61853	-0.60315	-0.55508		3.16329	0.027555	0.00856	0.0320875	0.0298675	0.0301475		3.16329	0.0968695	0.0614501	0.129116	0.116213	0.129273		3.16329	0.106584	0.0284896	0.0127409
4.21797	-0.62558	-0.7034	-0.62393	-0.60709	-0.55472		4.21797	0.023985	0.01506	0.0266875	0.0259275	0.0305075		4.21797	0.0843191	0.108112	0.107387	0.100882	0.130817		4.21797	0.106303	0.0167187	0.00747682
5.62442	-0.62823	-0.71448	-0.64215	-0.61157	-0.55746		5.62442	0.021335	0.00398	0.0084675	0.0214475	0.0277675		5.62442	0.0750031	0.0285714	0.034072	0.0834509	0.119068		5.62442	0.068033	0.0374213	0.0167353
7.49995	-0.63831	-0.71393	-0.63849	-0.61771	-0.56085		7.49995	0.011255	0.00453	0.0121275	0.0153075	0.0243775		7.49995	0.0395669	0.0325197	0.0487994	0.0595605	0.104531		7.49995	0.0569956	0.028444	0.0127205
10.001	-0.64124	-0.71613	-0.64252	-0.62045	-0.5592		10.001	0.008325	0.00233	0.0080975	0.0125675	0.0260275		10.001	0.0292665	0.0167265	0.0325832	0.0488994	0.111607		10.001	0.0478164	0.0374603	0.0167528
13.3362	-0.6405	-0.71667	-0.63757	-0.62659	-0.5658		13.3362	0.009065	0.00179	0.0130475	0.0064275	0.0194275		13.3362	0.031868	0.01285	0.0525013	0.025009	0.0833056		13.3362	0.0411068	0.0276293	0.0123562
17.7838	-0.64096	-0.71594	-0.64124	-0.62238	-0.5722		17.7838	0.008605	0.00252	0.0093775	0.0106375	0.0130275		17.7838	0.0302508	0.0180905	0.0377338	0.0413898	0.0558623		17.7838	0.0366654	0.0139477	0.00623762
23.7147	-0.64655	-0.71832	-0.64362	-0.62183	-0.57065		23.7147	0.003015	0.00014	0.0069975	0.0111875	0.0145775		23.7147	0.0105992	0.00100503	0.028157	0.0435299	0.0625087		23.7147	0.02916	0.0247833	0.0110834
31.6238	-0.64865	-0.71841	-0.64453	-0.62421	-0.56808		31.6238	0.000915	5e-05	0.0060875	0.0088075	0.0171475		31.6238	0.00321668	0.000358938	0.0244953	0.0342694	0.0735289		31.6238	0.0271738	0.0295774	0.0132274
42.1707	-0.63986	-0.71127	-0.63794	-0.62137	-0.56708		42.1707	0.009705	0.00719	0.0126775	0.0116475	0.0181475		42.1707	0.0341179	0.0516152	0.0510125	0.0453197	0.077817		42.1707	0.0519765	0.0160626	0.00718343
56.2351	-0.64389	-0.72162	-0.64261	-0.62869	-0.56186		56.2351	0.005675	-0.00316	0.0080075	0.0043275	0.0233675		56.2351	0.0199504	-0.0226849	0.0322211	0.016838	0.1002		56.2351	0.029305	0.044667	0.0199757
74.9904	-0.64737	-0.72208	-0.64563	-0.62228	-0.56277		74.9904	0.002195	-0.00362	0.0049875	0.0107375	0.0224575		74.9904	0.00771651	-0.0259871	0.020069	0.0417789	0.0962984		74.9904	0.0279751	0.0453967	0.020302
100.001	-0.65268	-0.7121	-0.64206	-0.62247	-0.56232		100.001	-0.003115	0.00636	0.0085575	0.0105475	0.0229075		100.001	-0.0109508	0.0456569	0.0344342	0.0410397	0.098228		100.001	0.0416816	0.0388471	0.017373

## Sheet: Fig 2D timida
		Original data (arbitrary units)							Zero level set							Normalized to maximum						Averaged data (shown in Fig. 2D)							Maxima
Time (s)	E timida 1	E timida 2	E timida 3	E timida 4	E timida 5		Time (s)	E timida 1	E timida 2	E timida 3	E timida 4	E timida 5		Time (s)	E timida 1	E timida 2	E timida 3	E timida 4	E timida 5		Time (s)	Average	stdev	SE	n		max1	max2	max3	max4	max5
0.000208	-0.82013	-0.75879	-0.7858	-0.82022	-0.83276		0.000208	-0.002885	-0.0002525	0.00098	0.0009625	-0.0010275		0.000208	-0.0832492	-0.00599229	0.0263795	0.0458061	-0.0395611		0.000208	-0.0113234	0.0516827	0.0231132	5		0.034655	0.0421375	0.03715	0.0210125	0.0259725
0.000408	-0.81573	-0.75412	-0.79092	-0.82178	-0.82892		0.000408	0.001515	0.0044175	-0.00414	-0.0005975	0.0028125		0.000408	0.0437166	0.104835	-0.11144	-0.0284355	0.108288		0.000408	0.0233928	0.0937005	0.0419042
0.000608	-0.81619	-0.75934	-0.78387	-0.8237	-0.82736		0.000608	0.001055	-0.0008025	0.00291	-0.0025175	0.0043725		0.000608	0.0304429	-0.0190448	0.0783311	-0.11981	0.168351		0.000608	0.0276541	0.107585	0.0481134
0.000808	-0.81693	-0.7619	-0.78653	-0.81903	-0.83789		0.000808	0.000315	-0.0033625	0.00025	0.0021525	-0.0061575		0.000808	0.0090896	-0.0797983	0.00672948	0.102439	-0.237078		0.000808	-0.0397236	0.127775	0.0571426
0.0011858	-0.78259	-0.72482	-0.74963	-0.80017	-0.80576		0.0011858	0.034655	0.0337175	0.03715	0.0210125	0.0259725		0.0011858	1	0.800178	1	1	1		0.0011858	0.960036	0.0893631	0.0399644
0.0012451	-0.78571	-0.7164	-0.76813	-0.80173	-0.80612		0.0012451	0.031535	0.0421375	0.01865	0.0194525	0.0256125		0.0012451	0.90997	1	0.502019	0.925758	0.986139		0.0012451	0.864777	0.206379	0.0922954
0.0013242	-0.79422	-0.73206	-0.76538	-0.80832	-0.81418		0.0013242	0.023025	0.0264775	0.0214	0.0128625	0.0175525		0.0013242	0.664406	0.62836	0.576043	0.612136	0.675811		0.0013242	0.631351	0.0403314	0.0180367
0.0014297	-0.79651	-0.73627	-0.77023	-0.80978	-0.82114		0.0014297	0.020735	0.0222675	0.01655	0.0114025	0.0105925		0.0014297	0.598326	0.528449	0.445491	0.542653	0.407835		0.0014297	0.504551	0.0769069	0.0343938
0.0015703	-0.79422	-0.73901	-0.76483	-0.81638	-0.81656		0.0015703	0.023025	0.0195275	0.02195	0.0048025	0.0151725		0.0015703	0.664406	0.463423	0.590848	0.228554	0.584176		0.0015703	0.506282	0.171166	0.0765479
0.0017579	-0.79065	-0.74194	-0.77417	-0.81244	-0.81473		0.0017579	0.026595	0.0165975	0.01261	0.0087425	0.0170025		0.0017579	0.767422	0.393889	0.339435	0.416062	0.654635		0.0017579	0.514288	0.186072	0.0832141
0.002008	-0.80164	-0.74304	-0.77097	-0.81802	-0.82095		0.002008	0.015605	0.0154975	0.01581	0.0031625	0.0107825		0.002008	0.450296	0.367784	0.425572	0.150506	0.415151		0.002008	0.361862	0.121887	0.0545095
0.0023415	-0.80676	-0.74203	-0.7695	-0.81317	-0.81885		0.0023415	0.010485	0.0165075	0.01728	0.0080125	0.0128825		0.0023415	0.302554	0.391753	0.465141	0.381321	0.496005		0.0023415	0.407355	0.0759978	0.0339872
0.0027863	-0.80511	-0.74854	-0.78058	-0.81171	-0.81674		0.0027863	0.012135	0.0099975	0.0062	0.0094725	0.0149925		0.0027863	0.350166	0.237259	0.166891	0.450803	0.577245		0.0027863	0.356473	0.164189	0.0734274
0.0033794	-0.79807	-0.74496	-0.77005	-0.81674	-0.82187		0.0033794	0.019175	0.0135775	0.01673	0.0044425	0.0098625		0.0033794	0.553311	0.322219	0.450336	0.211422	0.379729		0.0033794	0.383403	0.129116	0.0577423
0.0041703	-0.80887	-0.74716	-0.77499	-0.81573	-0.82755		0.0041703	0.008375	0.0113775	0.01179	0.0054525	0.0041825		0.0041703	0.241668	0.270009	0.317362	0.259488	0.161036		0.0041703	0.249913	0.0570352	0.0255069
0.005225	-0.80228	-0.7511	-0.77325	-0.81885	-0.82196		0.005225	0.014965	0.0074375	0.01353	0.0023325	0.0097725		0.005225	0.431828	0.176505	0.364199	0.111005	0.376263		0.005225	0.29196	0.139609	0.0624351
0.0066314	-0.80402	-0.74561	-0.77948	-0.8205	-0.82452		0.0066314	0.013225	0.0129275	0.0073	0.0006825	0.0072125		0.0066314	0.381619	0.306793	0.196501	0.0324807	0.277698		0.0066314	0.239018	0.133126	0.0595357
0.0085069	-0.80511	-0.73627	-0.77774	-0.81729	-0.82553		0.0085069	0.012135	0.0222675	0.00904	0.0038925	0.0062025		0.0085069	0.350166	0.528449	0.243338	0.185247	0.23881		0.0085069	0.309202	0.136386	0.0609939
0.011008	-0.80109	-0.74799	-0.77023	-0.82086	-0.82397		0.011008	0.016155	0.0105475	0.01655	0.0003225	0.0077625		0.011008	0.466166	0.250311	0.445491	0.015348	0.298874		0.011008	0.295238	0.181771	0.0812904
0.0143432	-0.80841	-0.75293	-0.77774	-0.81967	-0.82452		0.0143432	0.008835	0.0056075	0.00904	0.0015125	0.0072125		0.0143432	0.254942	0.133076	0.243338	0.071981	0.277698		0.0143432	0.196207	0.0890637	0.0398305
0.0187908	-0.80017	-0.74542	-0.77527	-0.81418	-0.82471		0.0187908	0.017075	0.0131175	0.01151	0.0070025	0.0070225		0.0187908	0.492714	0.311302	0.309825	0.333254	0.270382		0.0187908	0.343495	0.0864388	0.0386566
0.0247217	-0.8009	-0.74982	-0.77179	-0.8161	-0.82416		0.0247217	0.016345	0.0087175	0.01499	0.0050825	0.0075725		0.0247217	0.471649	0.206882	0.403499	0.24188	0.291558		0.0247217	0.323094	0.111388	0.0498142
0.0326308	-0.80978	-0.74936	-0.77582	-0.82645	-0.82544		0.0326308	0.007465	0.0091775	0.01096	-0.0052675	0.0062925		0.0326308	0.215409	0.217799	0.29502	-0.250684	0.242275		0.0326308	0.143964	0.222927	0.0996961
0.0431777	-0.80603	-0.75385	-0.77838	-0.8259	-0.82196		0.0431777	0.011215	0.0046875	0.0084	-0.0047175	0.0097725		0.0431777	0.323619	0.111243	0.22611	-0.224509	0.376263		0.0431777	0.162545	0.238801	0.106795
0.0572421	-0.81134	-0.74872	-0.77225	-0.81555	-0.82526		0.0572421	0.005905	0.0098175	0.01453	0.0056325	0.0064725		0.0572421	0.170394	0.232987	0.391117	0.268055	0.249206		0.0572421	0.262352	0.0807842	0.0361278
0.0759974	-0.80026	-0.74597	-0.77518	-0.82278	-0.82956		0.0759974	0.016985	0.0125675	0.0116	-0.0015975	0.0021725		0.0759974	0.490117	0.29825	0.312248	-0.0760262	0.0836462		0.0759974	0.221647	0.220117	0.0984393
0.101008	-0.80182	-0.74542	-0.77747	-0.82141	-0.82443		0.101008	0.015425	0.0131175	0.00931	-0.0002275	0.0073025		0.101008	0.445102	0.311302	0.250606	-0.0108269	0.281163		0.101008	0.255469	0.166339	0.0743893
0.13436	-0.80685	-0.74771	-0.77609	-0.81345	-0.82535		0.13436	0.010395	0.0108275	0.01069	0.0077325	0.0063825		0.13436	0.299957	0.256956	0.287752	0.367995	0.245741		0.13436	0.29168	0.0480211	0.0214757
0.178836	-0.8107	-0.75037	-0.7836	-0.81747	-0.82269		0.178836	0.006545	0.0081675	0.00318	0.0037125	0.0090425		0.178836	0.188862	0.19383	0.0855989	0.176681	0.348157		0.178836	0.198626	0.0945179	0.0422697
0.238145	-0.7999	-0.75211	-0.77518	-0.82187	-0.82782		0.238145	0.017345	0.0064275	0.0116	-0.0006875	0.0039125		0.238145	0.500505	0.152536	0.312248	-0.0327186	0.15064		0.238145	0.216642	0.200228	0.0895447
0.317236	-0.80347	-0.75101	-0.77014	-0.81454	-0.83267		0.317236	0.013775	0.0075275	0.01664	0.0066425	-0.0009375		0.317236	0.39749	0.178641	0.447914	0.316121	-0.0360959		0.317236	0.260814	0.194713	0.0870785
0.422704	-0.81042	-0.74954	-0.77573	-0.81793	-0.8237		0.422704	0.006825	0.0089975	0.01105	0.0032525	0.0080325		0.422704	0.196941	0.213527	0.297443	0.154789	0.309269		0.422704	0.234394	0.0666269	0.0297965
0.563349	-0.80539	-0.75549	-0.77371	-0.81326	-0.83533		0.563349	0.011855	0.0030475	0.01307	0.0079225	-0.0035975		0.563349	0.342086	0.0723228	0.351817	0.377037	-0.138512		0.563349	0.20095	0.226642	0.101357
0.750902	-0.80869	-0.74982	-0.77554	-0.81802	-0.82498		0.750902	0.008555	0.0087175	0.01124	0.0031625	0.0067525		0.750902	0.246862	0.206882	0.302557	0.150506	0.259987		0.750902	0.233359	0.0575444	0.0257346
1.00101	-0.79944	-0.7554	-0.77078	-0.8194	-0.82938		1.00101	0.017805	0.0031375	0.016	0.0017825	0.0023525		1.00101	0.513779	0.0744586	0.430686	0.0848305	0.0905766		1.00101	0.238866	0.215127	0.0962077
1.33453	-0.80054	-0.75302	-0.77463	-0.81921	-0.82654		1.33453	0.016705	0.0055175	0.01215	0.0019725	0.0051925		1.33453	0.482037	0.13094	0.327052	0.0938727	0.199923		1.33453	0.246765	0.158733	0.0709876
1.77929	-0.80658	-0.75357	-0.78214	-0.81949	-0.82535		1.77929	0.010665	0.0049675	0.00464	0.0016925	0.0063825		1.77929	0.307748	0.117888	0.124899	0.0805473	0.245741		1.77929	0.175365	0.0965903	0.0431965
2.37238	-0.7999	-0.74863	-0.78891	-0.81821	-0.83148		2.37238	0.017345	0.0099075	-0.00213	0.0029725	0.0002525		2.37238	0.500505	0.235123	-0.0573351	0.141463	0.00972182		2.37238	0.165896	0.218846	0.0978711
3.16329	-0.80887	-0.75595	-0.78186	-0.82022	-0.81967		3.16329	0.008375	0.0025875	0.00492	0.0009625	0.0120625		3.16329	0.241668	0.0614061	0.132436	0.0458061	0.464434		3.16329	0.18915	0.172207	0.0770135
4.21797	-0.8063	-0.76373	-0.77966	-0.82059	-0.82169		4.21797	0.010945	-0.0051925	0.00712	0.0005925	0.0100425		4.21797	0.315827	-0.123228	0.191655	0.0281975	0.386659		4.21797	0.159822	0.208715	0.0933403
5.62442	-0.80704	-0.75998	-0.78415	-0.815	-0.82315		5.62442	0.010205	-0.0014425	0.00263	0.0061825	0.0085825		5.62442	0.294474	-0.0342332	0.0707941	0.29423	0.330446		5.62442	0.191142	0.162779	0.0727969
7.49995	-0.80795	-0.77206	-0.789	-0.81619	-0.81509		7.49995	0.009295	-0.0135225	-0.00222	0.0049925	0.0166425		7.49995	0.268215	-0.320914	-0.0597577	0.237597	0.640774		7.49995	0.153183	0.363392	0.162514
10.001	-0.80988	-0.76804	-0.78891	-0.81812	-0.81747		10.001	0.007365	-0.0095025	-0.00213	0.0030625	0.0142625		10.001	0.212523	-0.225512	-0.0573351	0.145747	0.549139		10.001	0.124912	0.293295	0.131166
13.3362	-0.8063	-0.7804	-0.78946	-0.8194	-0.81097		13.3362	0.010945	-0.0218625	-0.00268	0.0017825	0.0207625		13.3362	0.315827	-0.518837	-0.07214	0.0848305	0.799403		13.3362	0.121817	0.486361	0.217507
17.7838	-0.81015	-0.78351	-0.78534	-0.81519	-0.81573		17.7838	0.007095	-0.0249725	0.00144	0.0059925	0.0160025		17.7838	0.204732	-0.592643	0.0387618	0.285187	0.616132		17.7838	0.110434	0.445706	0.199326
23.7147	-0.80502	-0.7868	-0.79257	-0.81931	-0.82278		23.7147	0.012225	-0.0282625	-0.00579	0.0018725	0.0089525		23.7147	0.352763	-0.670721	-0.155855	0.0891136	0.344692		23.7147	-0.00800149	0.425744	0.190399
31.6238	-0.80621	-0.78268	-0.79871	-0.82169	-0.82159		31.6238	0.011035	-0.0241425	-0.01193	-0.0005075	0.0101425		31.6238	0.318424	-0.572946	-0.321131	-0.0241523	0.390509		31.6238	-0.041859	0.411432	0.183998
42.1707	-0.79852	-0.78635	-0.79385	-0.82645	-0.82324		42.1707	0.018725	-0.0278125	-0.00707	-0.0052675	0.0084925		42.1707	0.540326	-0.660042	-0.19031	-0.250684	0.32698		42.1707	-0.0467457	0.480275	0.214786
56.2351	-0.81317	-0.75403	-0.79413	-0.81711	-0.81564		56.2351	0.004075	0.0045075	-0.00735	0.0040725	0.0160925		56.2351	0.117588	0.106971	-0.197847	0.193813	0.619598		56.2351	0.168025	0.293563	0.131285
74.9904	-0.81381	-0.76566	-0.79669	-0.81573	-0.81738		74.9904	0.003435	-0.0071225	-0.00991	0.0054525	0.0143525		74.9904	0.0991199	-0.16903	-0.266756	0.259488	0.552604		74.9904	0.0950851	0.33055	0.147827
100.001	-0.79962	-0.77893	-0.82452	-0.81839	-0.8204		100.001	0.017625	-0.0203925	-0.03774	0.0027925	0.0113325		100.001	0.508585	-0.483951	-1.01588	0.132897	0.436327		100.001	-0.0844049	0.651403	0.291316

## Sheet: Fig 2D Acetabularia
		Original data (arbitrary units)							Zero level set							Normalized to maximum						Averaged data (shown in Fig. 2D)							Maxima
Time (s)	Acetabularia 1	Acetabularia 2	Acetabularia 3	Acetabularia 4	Acetabularia 5		Time (s)	Acetabularia 1	Acetabularia 2	Acetabularia 3	Acetabularia 4	Acetabularia 5		Time (s)	Acetabularia 1	Acetabularia 2	Acetabularia 3	Acetabularia 4	Acetabularia 5		Time (s)	Average	stdev	SE	n		max1	max2	max3	max4	max5
0.000208	-0.53833	-0.02417	-0.088623	-0.014465	-0.022064		0.000208	-0.0011	-0.00189975	-0.0017165	-0.00256315	0.00702675		0.000208	-0.00866278	-0.0323592	-0.0352917	-0.0275555	0.110314		0.000208	0.00128897	0.061822	0.0276476	5		0.12698	0.0587082	0.0486375	0.0930178	0.0636977
0.000408	-0.53036	-0.020966	-0.083588	-0.010071	-0.030487		0.000408	0.00687	0.00130425	0.0033185	0.00183085	-0.00139625		0.000408	0.054103	0.0222158	0.0682292	0.0196828	-0.0219199		0.000408	0.0284622	0.0349761	0.0156418
0.000608	-0.53833	-0.024902	-0.085693	-0.0085144	-0.0336		0.000608	-0.0011	-0.00263175	0.0012135	0.00338745	-0.00450925		0.000608	-0.00866278	-0.0448276	0.0249499	0.0364172	-0.0707914		0.000608	-0.0125829	0.0454231	0.0203138
0.000808	-0.5419	-0.019043	-0.089722	-0.014557	-0.030212		0.000808	-0.00467	0.00322725	-0.0028155	-0.00265515	-0.00112125		0.000808	-0.0367774	0.054971	-0.0578874	-0.0285445	-0.0176027		0.000808	-0.0171682	0.0429425	0.0192045
0.0011858	-0.41025	0.036438	-0.038269	0.079559	0.031586		0.0011858	0.12698	0.0587082	0.0486375	0.0914609	0.0606768		0.0011858	1	1	1	0.983261	0.952573		0.0011858	0.987167	0.0206523	0.00923597
0.0012451	-0.4216	0.031403	-0.049072	0.081116	0.034607		0.0012451	0.11563	0.0536732	0.0378345	0.0930178	0.0636977		0.0012451	0.910616	0.914237	0.777887	1	1		0.0012451	0.920548	0.0909887	0.0406914
0.0013242	-0.4324	0.032684	-0.050995	0.0737	0.032867		0.0013242	0.10483	0.0549542	0.0359115	0.0856019	0.0619578		0.0013242	0.825563	0.936057	0.73835	0.920273	0.972683		0.0013242	0.878585	0.095358	0.0426454
0.0014297	-0.44083	0.030762	-0.046509	0.063904	0.021332		0.0014297	0.0964	0.0530323	0.0403975	0.0758059	0.0504228		0.0014297	0.759175	0.903319	0.830583	0.81496	0.791594		0.0014297	0.819926	0.0538191	0.0240686
0.0015703	-0.43982	0.021423	-0.054199	0.062714	0.019867		0.0015703	0.09741	0.0436933	0.0327075	0.0746159	0.0489578		0.0015703	0.767129	0.744244	0.672475	0.802167	0.768595		0.0015703	0.750922	0.0484757	0.021679
0.0017579	-0.44559	0.020966	-0.048889	0.064362	0.018768		0.0017579	0.09164	0.0432362	0.0380175	0.0762639	0.0478588		0.0017579	0.721688	0.73646	0.78165	0.819884	0.751341		0.0017579	0.762205	0.0391389	0.0175035
0.002008	-0.45135	0.014191	-0.061157	0.057587	0.014374		0.002008	0.08588	0.0364613	0.0257495	0.0694889	0.0434648		0.002008	0.676327	0.621058	0.529417	0.747049	0.682359		0.002008	0.651242	0.0814385	0.0364204
0.0023415	-0.46042	0.016937	-0.060883	0.049072	0.0054932		0.0023415	0.07681	0.0392072	0.0260235	0.0609738	0.034584		0.0023415	0.604898	0.667832	0.53505	0.655507	0.542938		0.0023415	0.601245	0.0615893	0.0275436
0.0027863	-0.45602	0.0071411	-0.061981	0.039642	0.0064087		0.0027863	0.08121	0.0294113	0.0249255	0.0515438	0.0354995		0.0027863	0.63955	0.500975	0.512475	0.554129	0.557311		0.0027863	0.552888	0.0544507	0.0243511
0.0033794	-0.46655	-0.00045776	-0.067017	0.036255	0.0075989		0.0033794	0.07068	0.0218125	0.0198895	0.0481569	0.0366897		0.0033794	0.556623	0.37154	0.408933	0.517716	0.575996		0.0033794	0.486162	0.0910123	0.0407019
0.0041703	-0.4682	-0.0076904	-0.070404	0.030396	0.0048523		0.0041703	0.06903	0.0145798	0.0165025	0.0422978	0.0339431		0.0041703	0.543629	0.248344	0.339296	0.454728	0.532877		0.0041703	0.423775	0.127612	0.0570697
0.005225	-0.46747	-0.014648	-0.084961	0.015015	-0.0083313		0.005225	0.06976	0.00762225	0.0019455	0.0269168	0.0207595		0.005225	0.549378	0.129833	0.04	0.289373	0.325906		0.005225	0.266898	0.196247	0.0877643
0.0066314	-0.46912	-0.040924	-0.097778	-0.0032959	-0.019135		0.0066314	0.06811	-0.0186538	-0.0108715	0.00860595	0.00995575		0.0066314	0.536384	-0.317736	-0.223521	0.0925193	0.156297		0.0066314	0.0487885	0.33901	0.15161
0.0085069	-0.47287	-0.062073	-0.1257	-0.03241	-0.031586		0.0085069	0.06436	-0.0398028	-0.0387935	-0.0205082	-0.00249525		0.0085069	0.506851	-0.677975	-0.797605	-0.220475	-0.0391733		0.0085069	-0.245675	0.524663	0.234636
0.011008	-0.47324	-0.081299	-0.14804	-0.058228	-0.03772		0.011008	0.06399	-0.0590287	-0.0611335	-0.0463262	-0.00862925		0.011008	0.503938	-1.00546	-1.25692	-0.498035	-0.135472		0.011008	-0.47839	0.701224	0.313597
0.0143432	-0.47809	-0.10684	-0.16333	-0.08432	-0.06601		0.0143432	0.05914	-0.0845697	-0.0764235	-0.0724182	-0.0369193		0.0143432	0.465743	-1.44051	-1.57129	-0.77854	-0.579601		0.0143432	-0.780839	0.814623	0.36431
0.0187908	-0.48441	-0.13568	-0.19189	-0.10464	-0.069122		0.0187908	0.05282	-0.11341	-0.104984	-0.0927381	-0.0400313		0.0187908	0.415971	-1.93175	-2.15849	-0.996993	-0.628456		0.0187908	-1.05994	1.04107	0.465581
0.0247217	-0.48431	-0.14566	-0.20874	-0.12735	-0.088348		0.0247217	0.05292	-0.12339	-0.121834	-0.115448	-0.0592572		0.0247217	0.416759	-2.10174	-2.50493	-1.24114	-0.930288		0.0247217	-1.27227	1.13778	0.508833
0.0326308	-0.48395	-0.1637	-0.21991	-0.14822	-0.099701		0.0326308	0.05328	-0.14143	-0.133003	-0.136318	-0.0706102		0.0326308	0.419594	-2.40903	-2.73459	-1.46551	-1.10852		0.0326308	-1.45961	1.24315	0.555953
0.0431777	-0.48495	-0.17139	-0.23099	-0.15829	-0.11169		0.0431777	0.05228	-0.14912	-0.144084	-0.146388	-0.0825992		0.0431777	0.411718	-2.54001	-2.9624	-1.57376	-1.29674		0.0431777	-1.59224	1.3114	0.586477
0.0572421	-0.49429	-0.18155	-0.23758	-0.1658	-0.10968		0.0572421	0.04294	-0.15928	-0.150674	-0.153898	-0.0805893		0.0572421	0.338163	-2.71307	-3.09789	-1.6545	-1.26518		0.0572421	-1.6785	1.35308	0.605117
0.0759974	-0.492	-0.18146	-0.24554	-0.17212	-0.11792		0.0759974	0.04523	-0.15919	-0.158634	-0.160218	-0.0888292		0.0759974	0.356198	-2.71154	-3.26155	-1.72245	-1.39454		0.0759974	-1.74678	1.39396	0.623396
0.101008	-0.49796	-0.19043	-0.24893	-0.17926	-0.12122		0.101008	0.03927	-0.16816	-0.162024	-0.167358	-0.0921292		0.101008	0.309261	-2.86433	-3.33125	-1.7992	-1.44635		0.101008	-1.82637	1.41846	0.634353
0.13436	-0.49191	-0.18787	-0.24591	-0.17377	-0.12653		0.13436	0.04532	-0.1656	-0.159003	-0.161868	-0.0974393		0.13436	0.356907	-2.82072	-3.26915	-1.74018	-1.52971		0.13436	-1.80057	1.40794	0.629649
0.178836	-0.49612	-0.18494	-0.2428	-0.17697	-0.12433		0.178836	0.04111	-0.16267	-0.155893	-0.165068	-0.0952392		0.178836	0.323752	-2.77082	-3.20521	-1.77459	-1.49517		0.178836	-1.78441	1.37111	0.613179
0.238145	-0.49612	-0.1908	-0.23602	-0.17697	-0.12149		0.238145	0.04111	-0.16853	-0.149114	-0.165068	-0.0923993		0.238145	0.323752	-2.87063	-3.06581	-1.77459	-1.45059		0.238145	-1.76757	1.35797	0.607303
0.317236	-0.49429	-0.18228	-0.24161	-0.168	-0.12845		0.317236	0.04294	-0.16001	-0.154703	-0.156098	-0.0993593		0.317236	0.338163	-2.72551	-3.18075	-1.67815	-1.55985		0.317236	-1.76122	1.36013	0.608266
0.422704	-0.50153	-0.17926	-0.23181	-0.17303	-0.12039		0.422704	0.0357	-0.15699	-0.144903	-0.161128	-0.0912992		0.422704	0.281147	-2.67407	-2.97925	-1.73223	-1.43332		0.422704	-1.70754	1.28278	0.573677
0.563349	-0.49924	-0.17139	-0.22247	-0.16763	-0.10574		0.563349	0.03799	-0.14912	-0.135564	-0.155728	-0.0766493		0.563349	0.299181	-2.54001	-2.78722	-1.67417	-1.20333		0.563349	-1.58111	1.23096	0.550503
0.750902	-0.50693	-0.16562	-0.23154	-0.16058	-0.11627		0.750902	0.0303	-0.14335	-0.144633	-0.148678	-0.0871792		0.750902	0.23862	-2.44173	-2.9737	-1.59838	-1.36864		0.750902	-1.62877	1.22734	0.548885
1.00101	-0.51736	-0.15573	-0.21487	-0.14813	-0.10153		1.00101	0.01987	-0.13346	-0.127964	-0.136228	-0.0724392		1.00101	0.156481	-2.27327	-2.63096	-1.46454	-1.13723		1.00101	-1.4699	1.08964	0.487303
1.33453	-0.51178	-0.14209	-0.20224	-0.14438	-0.10373		1.33453	0.02545	-0.11982	-0.115334	-0.132478	-0.0746393		1.33453	0.200425	-2.04094	-2.37129	-1.42422	-1.17177		1.33453	-1.36156	0.995094	0.445019
1.77929	-0.51379	-0.12698	-0.19052	-0.13193	-0.088898		1.77929	0.02344	-0.10471	-0.103613	-0.120028	-0.0598073		1.77929	0.184596	-1.78356	-2.13032	-1.29038	-0.938922		1.77929	-1.19172	0.894306	0.399946
2.37238	-0.51663	-0.1192	-0.17761	-0.11636	-0.087433		2.37238	0.0206	-0.0969298	-0.0907035	-0.104458	-0.0583422		2.37238	0.16223	-1.65104	-1.86489	-1.12299	-0.915923		2.37238	-1.07852	0.792785	0.354544
3.16329	-0.52634	-0.10794	-0.17294	-0.11224	-0.0802		3.16329	0.01089	-0.0856697	-0.0860335	-0.100338	-0.0511092		3.16329	0.0857615	-1.45925	-1.76887	-1.0787	-0.802371		3.16329	-1.00468	0.711704	0.318284
4.21797	-0.52103	-0.095581	-0.15939	-0.094666	-0.069855		4.21797	0.0162	-0.0733108	-0.0724835	-0.0827641	-0.0407643		4.21797	0.127579	-1.24873	-1.49028	-0.889766	-0.639964		4.21797	-0.828232	0.626086	0.279994
5.62442	-0.53	-0.072418	-0.14969	-0.084137	-0.063812		5.62442	0.00723	-0.0501477	-0.0627835	-0.0722351	-0.0347212		5.62442	0.0569381	-0.854186	-1.29085	-0.776573	-0.545094		5.62442	-0.681952	0.493472	0.220687
7.49995	-0.52753	-0.074524	-0.1376	-0.069672	-0.055298		7.49995	0.0097	-0.0522538	-0.0506935	-0.0577701	-0.0262072		7.49995	0.07639	-0.890058	-1.04227	-0.621065	-0.411431		7.49995	-0.577687	0.438963	0.19631
10.001	-0.53357	-0.062439	-0.13028	-0.055573	-0.052094		10.001	0.00366	-0.0401688	-0.0433735	-0.0436711	-0.0230032		10.001	0.0288234	-0.68421	-0.891771	-0.469492	-0.361131		10.001	-0.475556	0.347958	0.155612
13.3362	-0.52487	-0.054932	-0.12177	-0.055847	-0.043854		13.3362	0.01236	-0.0326618	-0.0348635	-0.0439452	-0.0147632		13.3362	0.0973382	-0.55634	-0.716803	-0.472438	-0.23177		13.3362	-0.376003	0.317341	0.141919
17.7838	-0.53238	-0.04248	-0.11691	-0.045685	-0.042389		17.7838	0.00485	-0.0202097	-0.0300035	-0.0337832	-0.0132983		17.7838	0.038195	-0.34424	-0.61688	-0.36319	-0.208771		17.7838	-0.298977	0.239299	0.107018
23.7147	-0.52872	-0.041931	-0.10666	-0.044769	-0.039459		23.7147	0.00851	-0.0196608	-0.0197535	-0.0328672	-0.0103682		23.7147	0.0670184	-0.334889	-0.406137	-0.353342	-0.162773		23.7147	-0.238025	0.193428	0.0865034
31.6238	-0.52753	-0.046783	-0.11389	-0.03717	-0.033875		31.6238	0.0097	-0.0245127	-0.0269835	-0.0252682	-0.00478425		31.6238	0.07639	-0.417535	-0.554788	-0.271648	-0.0751086		31.6238	-0.248538	0.254234	0.113697
42.1707	-0.52936	-0.034973	-0.10959	-0.03891	-0.038177		42.1707	0.00787	-0.0127027	-0.0226835	-0.0270082	-0.00908625		42.1707	0.0619783	-0.216371	-0.466379	-0.290354	-0.142646		42.1707	-0.210754	0.194122	0.086814
56.2351	-0.52112	-0.034424	-0.10602	-0.038452	-0.035522		56.2351	0.01611	-0.0121538	-0.0191135	-0.0265502	-0.00643125		56.2351	0.12687	-0.207019	-0.392979	-0.285431	-0.100965		56.2351	-0.171905	0.198301	0.0886831
74.9904	-0.51352	-0.042938	-0.10767	-0.038452	-0.03653		74.9904	0.02371	-0.0206677	-0.0207635	-0.0265502	-0.00743925		74.9904	0.186722	-0.352042	-0.426903	-0.285431	-0.11679		74.9904	-0.198889	0.244117	0.109172
100.001	-0.5137	-0.03772	-0.1041	-0.038818	-0.034515		100.001	0.02353	-0.0154497	-0.0171935	-0.0269161	-0.00542425		100.001	0.185305	-0.263161	-0.353503	-0.289365	-0.0851561		100.001	-0.161176	0.217745	0.0973784
