# Supplementary material for: Photosynthetic sea slugs induce protective changes to the light reactions of the chloroplasts they steal from algae
Source: eLife. 2020 Oct 20;9:e57389. doi: 10.7554/eLife.57389 (PMC7679141; doi:10.7554/eLife.57389)
Supplement: Figure 3—source data 1. [file elife-57389-fig3-data1.xlsx]

## Sheet: Fig3A timida
				Original data (arbitrary units)												Maxima												Normalized to maximum								Averaged data (shown in Fig. 3A)
Time (ms)	E timida 1	E timida 2	E timida 3	E timida 4	E timida 5	E timida 6	E timida 7	E timida 8	E timida 9	E timida 10		max1	max2	max3	max4	max5	max6	max7	max8	max9	max10		Time (ms)	E timida 1	E timida 2	E timida 3	E timida 4	E timida 5	E timida 6	E timida 7	E timida 8	E timida 9	E timida 10		Time (ms)	Average	stdev	SE	n
11	227	227	260	260	260	260	260	260	260	292		50717	69638	45092	67037	33713	57381	63656	94086	34721	70743		11	0.00447582	0.00325971	0.00576599	0.00387846	0.00771216	0.00453112	0.00408445	0.00276343	0.00748826	0.00412762		11	0.0048087	0.00167168	0.000528632	10
21	12841	14044	9493	13004	7737	13297	13752	18823	7607	14402													21	0.253189	0.201672	0.210525	0.193982	0.229496	0.231732	0.216036	0.200062	0.219089	0.203582		21	0.215937	0.0181061	0.00572564
31	13427	14694	9948	13557	8095	13947	14337	19766	7932	15150													31	0.264744	0.211005	0.220616	0.202232	0.240115	0.24306	0.225226	0.210084	0.22845	0.214155		31	0.225969	0.0188864	0.00597242
41	13687	15085	10143	13817	8192	14207	14597	20221	8030	15345													41	0.26987	0.21662	0.22494	0.20611	0.242992	0.247591	0.229311	0.21492	0.231272	0.216912		41	0.230054	0.0189853	0.00600367
51	13882	15280	10240	14012	8290	14434	14792	20481	8127	15540													51	0.273715	0.21942	0.227091	0.209019	0.245899	0.251547	0.232374	0.217684	0.234066	0.219668		51	0.233048	0.0193687	0.00612491
61	14109	15605	10371	14174	8355	14662	14987	20839	8192	15735													61	0.278191	0.224087	0.229996	0.211435	0.247827	0.25552	0.235437	0.221489	0.235938	0.222425		61	0.236235	0.0196553	0.00621555
71	14272	15865	10533	14304	8420	14890	15182	21132	8290	15962													71	0.281405	0.227821	0.233589	0.213375	0.249755	0.259494	0.238501	0.224603	0.23876	0.225634		71	0.239294	0.0198049	0.00626285
81	14532	16092	10696	14532	8517	15150	15410	21457	8387	16125													81	0.286531	0.231081	0.237204	0.216776	0.252633	0.264025	0.242082	0.228057	0.241554	0.227938		81	0.242788	0.020401	0.00645135
91	14727	16385	10858	14759	8647	15377	15605	21782	8485	16320													91	0.290376	0.235288	0.240797	0.220162	0.256489	0.267981	0.245146	0.231512	0.244377	0.230694		91	0.246282	0.0205982	0.00651371
101	14955	16645	11021	14857	8680	15605	15800	22107	8517	16515													101	0.294872	0.239022	0.244411	0.221624	0.257467	0.271954	0.248209	0.234966	0.245298	0.233451		101	0.249127	0.0211496	0.0066881
111	15182	16938	11151	15085	8745	15832	16027	22465	8582	16743													111	0.299347	0.243229	0.247294	0.225025	0.259395	0.27591	0.251775	0.238771	0.24717	0.236674		111	0.252459	0.0214115	0.0067709
121	15442	17230	11346	15280	8875	16027	16255	22822	8745	16970													121	0.304474	0.247422	0.251619	0.227934	0.263252	0.279308	0.255357	0.242565	0.251865	0.239882		121	0.256368	0.0218136	0.00689806
131	15670	17523	11508	15442	8940	16353	16483	23180	8777	17198													131	0.308969	0.25163	0.255212	0.23035	0.26518	0.28499	0.258939	0.24637	0.252786	0.243105		131	0.259753	0.0224726	0.00710646
141	15832	17848	11638	15670	9070	16613	16678	23537	8875	17425													141	0.312164	0.256297	0.258095	0.233752	0.269036	0.289521	0.262002	0.250165	0.255609	0.246314		141	0.263295	0.0225567	0.00713304
151	16092	18173	11834	15897	9168	16840	16873	23928	8940	17588													151	0.31729	0.260964	0.262441	0.237138	0.271943	0.293477	0.265065	0.254321	0.257481	0.248618		151	0.266874	0.0230853	0.00730021
161	16353	18466	11964	16092	9265	17100	17100	24285	9070	17816													161	0.322436	0.265171	0.265324	0.240047	0.27482	0.298008	0.268631	0.258115	0.261225	0.251841		161	0.270562	0.0236792	0.00748802
171	16580	18758	12159	16288	9298	17328	17295	24675	9135	18076													171	0.326912	0.269364	0.269649	0.24297	0.275799	0.301981	0.271695	0.26226	0.263097	0.255516		171	0.273924	0.0240202	0.00759587
181	16775	19083	12354	16483	9428	17588	17555	25065	9265	18271													181	0.330757	0.274031	0.273973	0.245879	0.279655	0.306513	0.275779	0.266405	0.266841	0.258273		181	0.277811	0.0243023	0.00768505
191	17003	19409	12516	16710	9493	17848	17816	25456	9298	18498													191	0.335252	0.278713	0.277566	0.249265	0.281583	0.311044	0.279879	0.270561	0.267792	0.261482		191	0.281314	0.0247994	0.00784225
201	17230	19734	12711	16938	9623	18108	17978	25911	9428	18758													201	0.339728	0.28338	0.28189	0.252666	0.285439	0.315575	0.282424	0.275397	0.271536	0.265157		201	0.285319	0.0250795	0.00793082
211	17490	20091	12841	17133	9688	18336	18206	26236	9493	18986													211	0.344855	0.288506	0.284773	0.255575	0.287367	0.319548	0.286006	0.278851	0.273408	0.26838		211	0.288727	0.0257562	0.00814484
221	17685	20384	13036	17328	9818	18596	18466	26626	9558	19181													221	0.3487	0.292714	0.289098	0.258484	0.291223	0.324079	0.29009	0.282996	0.27528	0.271136		221	0.29238	0.0261935	0.00828312
231	17946	20709	13199	17555	9915	18888	18661	27016	9688	19409													231	0.353846	0.297381	0.292713	0.26187	0.2941	0.329168	0.293154	0.287142	0.279024	0.274359		231	0.296276	0.0268116	0.00847856
241	18141	21002	13394	17718	9980	19116	18888	27406	9785	19701													241	0.357691	0.301588	0.297037	0.264302	0.296028	0.333142	0.29672	0.291287	0.281818	0.278487		241	0.29981	0.027096	0.00856851
251	18336	21359	13589	17978	10078	19344	19148	27764	9850	19896													251	0.361536	0.306715	0.301362	0.26818	0.298935	0.337115	0.300804	0.295092	0.28369	0.281243		251	0.303467	0.0273802	0.00865838
261	18596	21652	13784	18206	10208	19604	19344	28187	9980	20091													261	0.366662	0.310922	0.305686	0.271581	0.302791	0.341646	0.303883	0.299588	0.287434	0.284		261	0.307419	0.0279363	0.00883425
271	18791	22009	13882	18401	10305	19831	19571	28577	10078	20384													271	0.370507	0.316049	0.307859	0.27449	0.305668	0.345602	0.307449	0.303733	0.290257	0.288142		271	0.310976	0.0281925	0.00891524
281	19018	22302	14109	18596	10403	20059	19766	28934	10143	20579													281	0.374983	0.320256	0.312894	0.277399	0.308575	0.349576	0.310513	0.307527	0.292129	0.290898		281	0.314475	0.0287862	0.00910299
291	19181	22627	14272	18823	10468	20286	19994	29324	10240	20839													291	0.378197	0.324923	0.316508	0.280785	0.310503	0.353532	0.314095	0.311672	0.294922	0.294573		291	0.317971	0.0288946	0.00913729
301	19441	22952	14402	19051	10566	20481	20221	29715	10305	21002													301	0.383323	0.32959	0.319391	0.284186	0.31341	0.35693	0.317661	0.315828	0.296794	0.296877		301	0.321399	0.0295682	0.00935027
311	19636	23212	14597	19279	10663	20742	20449	30105	10403	21294													311	0.387168	0.333324	0.323716	0.287587	0.316287	0.361479	0.321242	0.319973	0.299617	0.301005		311	0.32514	0.0298167	0.00942888
321	19831	23537	14825	19474	10761	20969	20676	30462	10501	21522													321	0.391013	0.337991	0.328772	0.290496	0.319194	0.365435	0.324808	0.323768	0.302439	0.304228		321	0.328814	0.0301779	0.0095431
331	19994	23798	14955	19636	10891	21197	20839	30787	10598	21717													331	0.394227	0.341739	0.331655	0.292913	0.32305	0.369408	0.327369	0.327222	0.305233	0.306984		331	0.33198	0.0304793	0.00963841
341	20189	24155	15117	19896	10956	21424	21067	31178	10696	21977													341	0.398072	0.346865	0.335248	0.296791	0.324978	0.373364	0.330951	0.331378	0.308056	0.31066		341	0.335636	0.0307226	0.00971535
351	20416	24448	15345	20091	11086	21619	21294	31568	10793	22205													351	0.402547	0.351073	0.340304	0.2997	0.328835	0.376762	0.334517	0.335523	0.310849	0.313883		351	0.339399	0.0311153	0.00983953
361	20579	24740	15442	20254	11183	21782	21457	31893	10891	22400													361	0.405761	0.355266	0.342455	0.302132	0.331712	0.379603	0.337077	0.338977	0.313672	0.316639		361	0.342329	0.0313209	0.00990452
371	20839	25000	15637	20449	11248	21977	21652	32218	10956	22660													371	0.410888	0.358999	0.34678	0.305041	0.33364	0.383001	0.340141	0.342431	0.315544	0.320314		371	0.345678	0.0319947	0.0101176
381	21002	25293	15767	20709	11378	22205	21879	32608	11053	22887													381	0.414102	0.363207	0.349663	0.308919	0.337496	0.386975	0.343707	0.346577	0.318338	0.323523		381	0.349251	0.0320485	0.0101346
391	21197	25553	15962	20839	11443	22432	22042	32933	11151	23082													391	0.417947	0.36694	0.353987	0.310858	0.339424	0.390931	0.346267	0.350031	0.32116	0.32628		391	0.352383	0.0326436	0.0103228
401	21359	25813	16060	21067	11573	22595	22270	33258	11248	23310													401	0.421141	0.370674	0.356161	0.314259	0.34328	0.393771	0.349849	0.353485	0.323954	0.329503		401	0.355608	0.0325937	0.010307
411	21522	26106	16190	21262	11638	22790	22465	33551	11346	23505													411	0.424355	0.374882	0.359044	0.317168	0.345208	0.39717	0.352913	0.356599	0.326776	0.332259		411	0.358637	0.0328557	0.0103899
421	21684	26398	16418	21457	11703	23017	22660	33908	11378	23700													421	0.427549	0.379075	0.3641	0.320077	0.347136	0.401126	0.355976	0.360394	0.327698	0.335015		421	0.361815	0.0334087	0.0105647
431	21847	26626	16580	21619	11801	23180	22822	34266	11476	23993													431	0.430763	0.382349	0.367693	0.322494	0.350043	0.403966	0.358521	0.364199	0.33052	0.339157		431	0.36497	0.0334684	0.0105836
441	22009	26919	16710	21814	11899	23407	23050	34526	11573	24155													441	0.433957	0.386556	0.370576	0.325402	0.35295	0.407922	0.362103	0.366962	0.333314	0.341447		441	0.368119	0.0337968	0.0106875
451	22205	27146	16840	22009	11964	23537	23212	34851	11671	24350													451	0.437822	0.389816	0.373459	0.328311	0.354878	0.410188	0.364647	0.370416	0.336137	0.344204		451	0.370988	0.0340218	0.0107586
461	22367	27341	16970	22205	12061	23700	23407	35209	11736	24610													461	0.441016	0.392616	0.376342	0.331235	0.357755	0.413029	0.367711	0.374221	0.338009	0.347879		461	0.373981	0.0341181	0.0107891
471	22497	27601	17165	22367	12159	23830	23602	35404	11834	24740													471	0.443579	0.39635	0.380666	0.333652	0.360662	0.415294	0.370774	0.376294	0.340831	0.349717		471	0.376782	0.0341962	0.0108138
481	22660	27894	17263	22530	12256	24025	23765	35762	11899	25000													481	0.446793	0.400557	0.38284	0.336083	0.363539	0.418693	0.373335	0.380099	0.342703	0.353392		481	0.379803	0.0345315	0.0109198
491	22822	28089	17425	22725	12354	24188	23928	36022	11964	25196													491	0.449987	0.403357	0.386432	0.338992	0.366446	0.421533	0.375895	0.382862	0.344575	0.356162		491	0.382624	0.0347288	0.0109822
501	22985	28349	17555	22920	12451	24318	24090	36347	12094	25391													501	0.453201	0.407091	0.389315	0.341901	0.369323	0.423799	0.37844	0.386317	0.348319	0.358919		501	0.385663	0.0346935	0.010971
511	23115	28577	17685	23050	12516	24545	24253	36639	12159	25586													511	0.455764	0.410365	0.392198	0.34384	0.371251	0.427755	0.381001	0.38942	0.350192	0.361675		511	0.388346	0.035108	0.0111021
521	23212	28804	17816	23212	12614	24675	24415	36899	12224	25781													521	0.457677	0.413625	0.395103	0.346257	0.374158	0.43002	0.383546	0.392184	0.352064	0.364432		521	0.390907	0.0350579	0.0110863
531	23375	29064	17946	23440	12679	24838	24578	37192	12321	25943													531	0.460891	0.417358	0.397986	0.349658	0.376086	0.432861	0.386107	0.395298	0.354857	0.366722		531	0.393782	0.0352341	0.011142
541	23537	29259	18043	23602	12776	25000	24740	37452	12419	26171													541	0.464085	0.420159	0.400137	0.352074	0.378964	0.435684	0.388652	0.398061	0.35768	0.369945		541	0.396544	0.0353294	0.0111721
551	23635	29454	18173	23765	12874	25163	24903	37777	12484	26333													551	0.466017	0.422959	0.40302	0.354506	0.38187	0.438525	0.391212	0.401516	0.359552	0.372235		551	0.399141	0.0353651	0.0111834
561	23830	29650	18271	23895	12971	25326	25098	37940	12549	26528													561	0.469862	0.425773	0.405194	0.356445	0.384748	0.441366	0.394275	0.403248	0.361424	0.374991		561	0.401733	0.0358075	0.0113233
571	23960	29845	18433	24058	13004	25423	25261	38265	12614	26659													571	0.472425	0.428573	0.408786	0.358876	0.385727	0.443056	0.396836	0.406702	0.363296	0.376843		571	0.404112	0.0359893	0.0113808
581	24058	30072	18596	24220	13069	25618	25423	38493	12711	26821													581	0.474358	0.431833	0.412401	0.361293	0.387655	0.446454	0.399381	0.409126	0.36609	0.379133		581	0.406772	0.036079	0.0114092
591	24220	30300	18693	24383	13166	25748	25586	38753	12744	27081													591	0.477552	0.435107	0.414552	0.363725	0.390532	0.44872	0.401942	0.411889	0.36704	0.382808		591	0.409387	0.0363375	0.0114909
601	24318	30495	18791	24480	13264	25813	25748	38980	12841	27244													601	0.479484	0.437907	0.416726	0.365171	0.393439	0.449853	0.404487	0.414302	0.369834	0.385112		601	0.411631	0.0361774	0.0114403
611	24448	30690	18888	24643	13362	26008	25878	39208	12906	27374													611	0.482047	0.440708	0.418877	0.367603	0.396346	0.453251	0.406529	0.416725	0.371706	0.38695		611	0.414074	0.0364482	0.0115259
1021	28219	36477	22400	29422	15832	30137	30365	46458	15215	32641													1021	0.556401	0.523809	0.496762	0.438892	0.469611	0.525209	0.477017	0.493782	0.438207	0.461403		1021	0.488109	0.038748	0.0122532
1121	28869	37420	22952	30267	16288	30885	31178	47628	15637	33583													1121	0.569217	0.53735	0.509004	0.451497	0.483137	0.538244	0.489789	0.506218	0.450361	0.474718		1121	0.500954	0.0388783	0.0122944
1221	29422	38265	23537	31048	16678	31470	31893	48701	16027	34331													1221	0.580121	0.549484	0.521977	0.463147	0.494705	0.548439	0.501021	0.517622	0.461594	0.485292		1221	0.51234	0.0388211	0.0122763
1321	29942	39078	23993	31730	17068	32023	32511	49644	16353	35079													1321	0.590374	0.561159	0.53209	0.473321	0.506274	0.558077	0.51073	0.527645	0.470983	0.495865		1321	0.522652	0.0389718	0.012324
1421	30365	39695	24415	32315	17393	32543	33096	50457	16645	35664													1421	0.598714	0.570019	0.541449	0.482047	0.515914	0.567139	0.51992	0.536286	0.479393	0.504135		1421	0.531502	0.0389874	0.0123289
1521	30755	40281	24740	32836	17718	33031	33616	51204	16938	36282													1521	0.606404	0.578434	0.548656	0.489819	0.525554	0.575644	0.528088	0.544225	0.487832	0.512871		1521	0.539753	0.0388381	0.0122817
1621	31113	40801	25163	33356	17946	33421	34039	51887	17165	36737													1621	0.613463	0.585901	0.558037	0.497576	0.532317	0.58244	0.534734	0.551485	0.494369	0.519302		1621	0.546962	0.0389793	0.0123263
1721	31438	41288	25391	33746	18206	33811	34429	52440	17393	37192													1721	0.619871	0.592895	0.563093	0.503394	0.540029	0.589237	0.54086	0.557362	0.500936	0.525734		1721	0.553341	0.0390536	0.0123498
1821	31795	41711	25716	34201	18433	34136	34786	52960	17620	37582													1821	0.62691	0.598969	0.570301	0.510181	0.546762	0.594901	0.546469	0.562889	0.507474	0.531247		1821	0.55961	0.0390904	0.0123615
1921	32088	42101	26008	34559	18628	34429	35144	53448	17783	37972													1921	0.632687	0.604569	0.576776	0.515521	0.552546	0.600007	0.552092	0.568076	0.512168	0.53676		1921	0.56512	0.0392702	0.0124183
2021	32315	42394	26203	34949	18823	34721	35436	53903	17978	38232													2021	0.637163	0.608777	0.581101	0.521339	0.558331	0.605096	0.55668	0.572912	0.517785	0.540435		2021	0.569962	0.0389586	0.0123198
2121	32543	42686	26398	35241	18986	34981	35697	54260	18108	38558													2121	0.641659	0.61297	0.585425	0.525695	0.563166	0.609627	0.56078	0.576706	0.521529	0.545043		2121	0.57426	0.0390442	0.0123469
2221	32803	42979	26594	35534	19148	35274	35989	54716	18238	38850													2221	0.646785	0.617177	0.589772	0.530065	0.567971	0.614733	0.565367	0.581553	0.525273	0.549171		2221	0.578787	0.0393415	0.0124409
2321	32998	43272	26756	35794	19279	35502	36249	55041	18401	39143													2321	0.65063	0.621385	0.593365	0.533944	0.571857	0.618707	0.569451	0.585007	0.529967	0.553313		2321	0.582763	0.039216	0.0124012
2421	33161	43532	26919	36054	19441	35729	36444	55301	18531	39305													2421	0.653844	0.625118	0.59698	0.537822	0.576662	0.622663	0.572515	0.587771	0.533712	0.555603		2421	0.586269	0.0392264	0.0124045
2521	33323	43727	27114	36282	19604	35827	36672	55626	18596	39565													2521	0.657038	0.627919	0.601304	0.541224	0.581497	0.62437	0.576097	0.591225	0.535584	0.559278		2521	0.589553	0.039144	0.0123784
2621	33518	43954	27276	36509	19669	36054	36867	55918	18791	39760													2621	0.660883	0.631178	0.604897	0.54461	0.583425	0.628326	0.57916	0.594329	0.5412	0.562034		2621	0.593004	0.0390497	0.0123486
2721	33681	44182	27341	36672	19799	36249	37062	56179	18856	39923													2721	0.664097	0.634452	0.606338	0.547041	0.587281	0.631725	0.582223	0.597103	0.543072	0.564339		2721	0.595767	0.0393929	0.0124571
2821	33843	44312	27504	36867	19929	36412	37225	56471	18986	40086													2821	0.667291	0.636319	0.609953	0.54995	0.591137	0.634565	0.584784	0.600206	0.546816	0.566643		2821	0.598766	0.0392742	0.0124196
2921	33941	44507	27634	37095	20026	36542	37387	56666	19083	40248													2921	0.669223	0.639119	0.612836	0.553351	0.594014	0.636831	0.587329	0.602279	0.54961	0.568933		2921	0.601352	0.039026	0.0123411
3021	34104	44637	27699	37257	20091	36737	37550	56926	19181	40443													3021	0.672437	0.640986	0.614277	0.555768	0.595942	0.640229	0.589889	0.605042	0.552432	0.571689		3021	0.603869	0.0391072	0.0123668
3121	34234	44832	27861	37452	20221	36867	37712	57121	19246	40541													3121	0.675	0.643786	0.61787	0.558677	0.599798	0.642495	0.592434	0.607115	0.554304	0.573074		3121	0.606455	0.0392702	0.0124183
3221	34331	44995	27959	37615	20254	37030	37842	57349	19311	40703													3221	0.676913	0.646127	0.620043	0.561108	0.600777	0.645336	0.594477	0.609538	0.556176	0.575364		3221	0.608586	0.0393352	0.0124389
3321	34461	45092	28089	37712	20351	37127	37972	57576	19409	40898													3321	0.679476	0.64752	0.622926	0.562555	0.603654	0.647026	0.596519	0.611951	0.558999	0.578121		3321	0.610875	0.0392419	0.0124094
3421	34559	45222	28187	37875	20449	37225	38102	57772	19506	40931													3421	0.681409	0.649387	0.6251	0.564986	0.606561	0.648734	0.598561	0.614034	0.561793	0.578587		3421	0.612915	0.0391432	0.0123782
3521	34656	45320	28252	38005	20514	37355	38232	57934	19604	41093													3521	0.683321	0.650794	0.626541	0.566926	0.608489	0.650999	0.600603	0.615756	0.564615	0.580877		3521	0.614892	0.0389336	0.0123119
3621	34721	45450	28284	38070	20546	37517	38395	58064	19636	41223													3621	0.684603	0.652661	0.627251	0.567895	0.609438	0.653823	0.603164	0.617138	0.565537	0.582715		3621	0.616422	0.0391341	0.0123753
3721	34884	45547	28447	38265	20676	37615	38525	58227	19701	41353													3721	0.687817	0.654054	0.630866	0.570804	0.613295	0.655531	0.605206	0.61887	0.567409	0.584553		3721	0.61884	0.0392053	0.0123978
3821	34949	45710	28544	38395	20742	37777	38623	58454	19831	41419													3821	0.689098	0.656394	0.633017	0.572743	0.615252	0.658354	0.606746	0.621283	0.571153	0.585485		3821	0.620953	0.0390738	0.0123562
3921	35046	45808	28577	38525	20774	37875	38753	58584	19929	41581													3921	0.691011	0.657802	0.633749	0.574683	0.616201	0.660062	0.608788	0.622664	0.573975	0.587775		3921	0.622671	0.038804	0.0122709
4021	35111	45873	28707	38623	20839	37972	38850	58779	19929	41646													4021	0.692293	0.658735	0.636632	0.576145	0.61813	0.661752	0.610312	0.624737	0.573975	0.588694		4021	0.62414	0.0390391	0.0123452
4121	35209	46035	28772	38753	20937	38102	39013	58909	20026	41841													4121	0.694225	0.661061	0.638073	0.578084	0.621036	0.664018	0.612872	0.626119	0.576769	0.591451		4121	0.626371	0.0388501	0.0122855
4221	35306	46133	28837	38850	21034	38167	39078	59072	20091	41874													4221	0.696137	0.662469	0.639515	0.579531	0.623914	0.66515	0.613893	0.627851	0.578641	0.591917		4221	0.627902	0.0389397	0.0123138
4321	35371	46198	28934	38948	21002	38297	39208	59202	20156	42004													4321	0.697419	0.663402	0.641666	0.580993	0.622964	0.667416	0.615936	0.629233	0.580513	0.593755		4321	0.62933	0.03888	0.0122949
4421	35469	46263	28999	39078	21067	38395	39305	59430	20221	42134													4421	0.699351	0.664336	0.643107	0.582932	0.624892	0.669124	0.617459	0.631656	0.582385	0.595592		4421	0.631084	0.0387755	0.0122619
4521	35567	46360	29129	39208	21164	38525	39435	59527	20286	42231													4521	0.701284	0.665728	0.64599	0.584871	0.62777	0.671389	0.619502	0.632687	0.584257	0.596964		4521	0.633044	0.0388398	0.0122822
4621	35664	46490	29227	39305	21229	38590	39533	59657	20351	42296													4621	0.703196	0.667595	0.648164	0.586318	0.629698	0.672522	0.621041	0.634069	0.586129	0.597882		4621	0.634662	0.0389487	0.0123167
4721	35729	46523	29259	39370	21262	38720	39630	59885	20416	42394													4721	0.704478	0.668069	0.648873	0.587288	0.630677	0.674788	0.622565	0.636492	0.588001	0.599268		4721	0.63605	0.0389058	0.0123031
4821	35827	46685	29357	39533	21294	38785	39728	59950	20449	42491													4821	0.70641	0.670395	0.651047	0.589719	0.631626	0.675921	0.624105	0.637183	0.588952	0.600639		4821	0.6376	0.0390199	0.0123392
4921	35892	46750	29454	39598	21327	38883	39858	60145	20579	42621													4921	0.707692	0.671329	0.653198	0.590689	0.632605	0.677628	0.626147	0.639256	0.592696	0.602477		4921	0.639372	0.0386929	0.0122358
5021	35989	46880	29585	39728	21424	38980	39923	60275	20611	42654													5021	0.709604	0.673196	0.656103	0.592628	0.635482	0.679319	0.627168	0.640637	0.593618	0.602943		5021	0.64107	0.0390081	0.0123354
5121	36022	46913	29585	39825	21457	39110	39988	60437	20676	42849													5121	0.710255	0.67367	0.656103	0.594075	0.636461	0.681584	0.628189	0.642359	0.59549	0.6057		5121	0.642389	0.0386226	0.0122135
5221	36119	47010	29682	39891	21489	39175	40151	60600	20742	42914													5221	0.712168	0.675062	0.658254	0.595059	0.63741	0.682717	0.63075	0.644092	0.597391	0.606618		5221	0.643952	0.0387268	0.0122465
5321	36184	47075	29747	39988	21587	39273	40183	60763	20807	43012													5321	0.713449	0.675996	0.659696	0.596506	0.640317	0.684425	0.631252	0.645824	0.599263	0.608004		5321	0.645473	0.0386408	0.0122193
5421	36249	47140	29845	40118	21619	39403	40313	60828	20872	43109													5421	0.714731	0.676929	0.661869	0.598446	0.641266	0.686691	0.633295	0.646515	0.601135	0.609375		5421	0.647025	0.0385536	0.0121917
5521	36314	47238	29877	40216	21684	39403	40378	61055	20937	43239													5521	0.716012	0.678337	0.662579	0.599908	0.643194	0.686691	0.634316	0.648928	0.603007	0.611212		5521	0.648418	0.0382326	0.0120902
5621	36379	47270	29975	40281	21717	39500	40508	61185	20904	43272													5621	0.717294	0.678796	0.664752	0.600877	0.644173	0.688381	0.636358	0.650309	0.602056	0.611679		5621	0.649468	0.0386522	0.0122229
5721	36477	47368	30072	40346	21749	39630	40573	61315	21002	43369													5721	0.719226	0.680203	0.666903	0.601847	0.645122	0.690647	0.637379	0.651691	0.604879	0.61305		5721	0.651095	0.0387819	0.0122639
5821	36542	47498	30105	40411	21814	39695	40703	61478	21067	43499													5821	0.720508	0.68207	0.667635	0.602816	0.64705	0.69178	0.639421	0.653423	0.606751	0.614888		5821	0.652634	0.0386566	0.0122243
5921	36574	47563	30202	40541	21879	39760	40768	61608	21164	43564													5921	0.721139	0.683004	0.669786	0.604756	0.648978	0.692912	0.640442	0.654805	0.609545	0.615807		5921	0.654117	0.0382706	0.0121022
6021	36639	47628	30235	40638	21944	39858	40833	61738	21164	43662													6021	0.72242	0.683937	0.670518	0.606203	0.650906	0.69462	0.641463	0.656187	0.609545	0.617192		6021	0.655299	0.0383996	0.012143
6121	36737	47693	30365	40768	21944	39956	40996	61900	21262	43792													6121	0.724353	0.68487	0.673401	0.608142	0.650906	0.696328	0.644024	0.657909	0.612367	0.619029		6121	0.657133	0.0382332	0.0120904
6221	36769	47823	30430	40866	22009	39988	41028	62030	21294	43824													6221	0.724984	0.686737	0.674843	0.609604	0.652834	0.696886	0.644527	0.65929	0.613289	0.619482		6221	0.658247	0.0382138	0.0120843
6321	36834	47856	30495	40898	22074	40086	41093	62128	21327	43954													6321	0.726265	0.687211	0.676284	0.610081	0.654762	0.698594	0.645548	0.660332	0.614239	0.621319		6321	0.659464	0.0382998	0.0121114
6421	36899	47953	30560	40996	22107	40216	41191	62258	21392	44052													6421	0.727547	0.688604	0.677726	0.611543	0.655741	0.700859	0.647087	0.661714	0.616111	0.622705		6421	0.660964	0.038309	0.0121144
6521	36997	47986	30625	41093	22107	40281	41288	62388	21489	44117													6521	0.729479	0.689078	0.679167	0.61299	0.655741	0.701992	0.648611	0.663095	0.618905	0.623624		6521	0.662268	0.0381977	0.0120792
6621	37062	48051	30690	41191	22172	40346	41321	62518	21522	44247													6621	0.730761	0.690011	0.680609	0.614452	0.657669	0.703125	0.64913	0.664477	0.619855	0.625461		6621	0.663555	0.0381352	0.0120594
6721	37095	48148	30755	41256	22205	40443	41451	62648	21554	44312													6721	0.731412	0.691404	0.68205	0.615421	0.658648	0.704815	0.651172	0.665859	0.620777	0.62638		6721	0.664794	0.0381819	0.0120742
6821	37160	48213	30820	41288	22302	40508	41549	62778	21619	44377													6821	0.732693	0.692338	0.683492	0.615899	0.661525	0.705948	0.652711	0.667241	0.622649	0.627299		6821	0.666179	0.0381932	0.0120778
6921	37225	48311	30885	41419	22302	40573	41646	62908	21684	44475													6921	0.733975	0.693745	0.684933	0.617853	0.661525	0.707081	0.654235	0.668622	0.624521	0.628684		6921	0.667517	0.0380202	0.012023
7021	37290	48376	30982	41516	22367	40671	41711	63038	21782	44572													7021	0.735256	0.694678	0.687084	0.6193	0.663453	0.708789	0.655256	0.670004	0.627344	0.630055		7021	0.669122	0.0378624	0.0119731
7121	37290	48408	31015	41614	22432	40736	41776	63168	21782	44637													7121	0.735256	0.695138	0.687816	0.620762	0.665381	0.709921	0.656277	0.671386	0.627344	0.630974		7121	0.670026	0.0376829	0.0119164
7221	37387	48538	31113	41614	22400	40801	41874	63266	21814	44735													7221	0.737169	0.697005	0.689989	0.620762	0.664432	0.711054	0.657817	0.672427	0.628265	0.632359		7221	0.671128	0.0381249	0.0120561
7321	37452	48571	31178	41776	22497	40898	41906	63396	21879	44865													7321	0.738451	0.697478	0.691431	0.623178	0.667309	0.712745	0.65832	0.673809	0.630137	0.634197		7321	0.672706	0.0378228	0.0119606
7421	37517	48636	31243	41841	22562	40898	42004	63559	21944	44930													7421	0.739732	0.698412	0.692872	0.624148	0.669237	0.712745	0.659859	0.675542	0.632009	0.635116		7421	0.673967	0.0376525	0.0119068
7521	37517	48701	31308	41939	22562	41061	42069	63689	21977	44995													7521	0.739732	0.699345	0.694314	0.62561	0.669237	0.715585	0.66088	0.676923	0.63296	0.636035		7521	0.675062	0.0376599	0.0119091
7621	37647	48799	31373	42004	22627	41061	42166	63786	22009	45092													7621	0.742295	0.700752	0.695755	0.626579	0.671165	0.715585	0.662404	0.677954	0.633882	0.637406		7621	0.676378	0.0378323	0.0119636
7721	37680	48864	31405	42069	22660	41158	42231	63851	22074	45157													7721	0.742946	0.701686	0.696465	0.627549	0.672144	0.717276	0.663425	0.678645	0.635754	0.638325		7721	0.677421	0.0377279	0.0119306
7821	37777	48929	31470	42166	22692	41256	42329	63981	22139	45222													7821	0.744859	0.702619	0.697907	0.628996	0.673093	0.718984	0.664965	0.680027	0.637626	0.639243		7821	0.678832	0.0378254	0.0119614
7921	37745	48994	31568	42264	22725	41321	42394	64111	22172	45352													7921	0.744228	0.703553	0.70008	0.630458	0.674072	0.720116	0.665986	0.681408	0.638576	0.641081		7921	0.679956	0.0374329	0.0118373
8021	37875	49026	31600	42296	22757	41353	42459	64209	22172	45417													8021	0.746791	0.704012	0.700789	0.630935	0.675022	0.720674	0.667007	0.68245	0.638576	0.642		8021	0.680826	0.0378364	0.0119649
8121	37940	49124	31698	42394	22790	41484	42524	64339	22270	45515													8121	0.748073	0.705419	0.702963	0.632397	0.676	0.722957	0.668028	0.683832	0.641399	0.643385		8121	0.682445	0.0378059	0.0119553
8221	37972	49189	31698	42491	22855	41516	42589	64436	22302	45612													8221	0.748704	0.706353	0.702963	0.633844	0.677928	0.723515	0.669049	0.684863	0.64232	0.644756		8221	0.68343	0.0375026	0.0118594
8321	38005	49254	31795	42556	22887	41581	42686	64501	22335	45645													8321	0.749354	0.707286	0.705114	0.634814	0.678878	0.724648	0.670573	0.685554	0.643271	0.645223		8321	0.684471	0.0375648	0.011879
8421	38070	49286	31860	42589	22920	41679	42751	64664	22367	45775													8421	0.750636	0.707746	0.706555	0.635306	0.679856	0.726355	0.671594	0.687286	0.644192	0.64706		8421	0.685659	0.0376852	0.0119171
8521	38102	49384	31893	42686	22985	41711	42784	64794	22432	45775													8521	0.751267	0.709153	0.707287	0.636753	0.681784	0.726913	0.672113	0.688668	0.646064	0.64706		8521	0.686706	0.0375234	0.0118659
8621	38167	49416	31958	42719	23017	41744	42849	64826	22465	45905													8621	0.752548	0.709613	0.708729	0.637245	0.682734	0.727488	0.673134	0.689008	0.647015	0.648898		8621	0.687641	0.0374995	0.0118584
8721	38232	49481	32055	42816	23050	41841	42914	64956	22497	45970													8721	0.75383	0.710546	0.71088	0.638692	0.683713	0.729179	0.674155	0.69039	0.647936	0.649817		8721	0.688914	0.0376576	0.0119084
8821	38200	49579	32055	42882	23082	41874	42979	65119	22562	46035													8821	0.753199	0.711953	0.71088	0.639677	0.684662	0.729754	0.675176	0.692122	0.649808	0.650736		8821	0.689797	0.0371696	0.0117541
8921	38330	49611	32120	42979	23115	41971	43077	65184	22595	46068													8921	0.755762	0.712413	0.712321	0.641124	0.685641	0.731444	0.676715	0.692813	0.650759	0.651202		8921	0.691019	0.0375203	0.0118649
9021	38330	49611	32218	43044	23147	42036	43142	65314	22595	46198													9021	0.755762	0.712413	0.714495	0.642093	0.68659	0.732577	0.677737	0.694195	0.650759	0.65304		9021	0.691966	0.0373895	0.0118236
9121	38428	49709	32218	43109	23180	42101	43207	65379	22660	46295													9121	0.757695	0.71382	0.714495	0.643063	0.687569	0.73371	0.678758	0.694886	0.652631	0.654411		9121	0.693104	0.0373965	0.0118258
9221	38460	49774	32283	43174	23212	42101	43239	65542	22725	46328													9221	0.758326	0.714753	0.715936	0.644032	0.688518	0.73371	0.67926	0.696618	0.654503	0.654878		9221	0.694053	0.0372201	0.01177
9321	38493	49839	32315	43272	23277	42199	43304	65574	22757	46425													9321	0.758976	0.715687	0.716646	0.645494	0.690446	0.735418	0.680282	0.696958	0.655425	0.656249		9321	0.695158	0.0370925	0.0117297
9421	38558	49904	32413	43304	23277	42231	43369	65672	22757	46458													9421	0.760258	0.71662	0.718819	0.645972	0.690446	0.735975	0.681303	0.698	0.655425	0.656715		9421	0.695953	0.0374408	0.0118398
9521	38623	49936	32478	43402	23342	42296	43499	65737	22855	46588													9521	0.76154	0.71708	0.720261	0.647434	0.692374	0.737108	0.683345	0.698691	0.658247	0.658553		9521	0.697463	0.037064	0.0117207
9621	38590	50034	32478	43434	23375	42361	43499	65867	22855	46620													9621	0.760889	0.718487	0.720261	0.647911	0.693353	0.738241	0.683345	0.700072	0.658247	0.659005		9621	0.697981	0.0370286	0.0117095
9721	38688	50034	32543	43532	23407	42426	43564	65964	22920	46718													9721	0.762821	0.718487	0.721702	0.649373	0.694302	0.739374	0.684366	0.701103	0.660119	0.66039		9721	0.699204	0.0369742	0.0116923
9821	38720	50131	32608	43564	23472	42556	43597	66062	22920	46783													9821	0.763452	0.71988	0.723144	0.64985	0.69623	0.741639	0.684884	0.702145	0.660119	0.661309		9821	0.700265	0.0373272	0.0118039
9921	38785	50131	32608	43662	23472	42556	43694	66127	22985	46815													9921	0.764734	0.71988	0.723144	0.651312	0.69623	0.741639	0.686408	0.702836	0.661991	0.661762		9921	0.700994	0.0370129	0.0117045
10021	38785	50262	32706	43727	23505	42621	43759	66224	23050	46913													10021	0.764734	0.721761	0.725317	0.652282	0.697209	0.742772	0.687429	0.703867	0.663863	0.663147		10021	0.702238	0.0368271	0.0116458
10121	38850	50294	32771	43759	23537	42654	43792	66387	23082	46978													10121	0.766015	0.722221	0.726759	0.652759	0.698158	0.743347	0.687948	0.705599	0.664785	0.664066		10121	0.703166	0.0369529	0.0116855
10221	38915	50327	32803	43824	23602	42686	43857	66387	23115	47043													10221	0.767297	0.722695	0.727468	0.653729	0.700086	0.743905	0.688969	0.705599	0.665735	0.664985		10221	0.704047	0.0369031	0.0116698
10321	38948	50359	32868	43922	23602	42784	43889	66550	23115	47108													10321	0.767948	0.723154	0.72891	0.65519	0.700086	0.745613	0.689472	0.707332	0.665735	0.665903		10321	0.704934	0.037021	0.0117071
10421	38980	50424	32901	43954	23635	42784	43954	66680	23180	47140													10421	0.768579	0.724087	0.729642	0.655668	0.701065	0.745613	0.690493	0.708713	0.667607	0.666356		10421	0.705782	0.0368511	0.0116533
10521	39078	50457	32966	44019	23668	42882	44052	66712	23212	47238													10521	0.770511	0.724561	0.731083	0.656637	0.702044	0.747321	0.692032	0.709053	0.668529	0.667741		10521	0.706951	0.0370559	0.0117181
10621	39110	50489	33031	44117	23668	42914	44052	66777	23245	47270													10621	0.771142	0.725021	0.732525	0.658099	0.702044	0.747878	0.692032	0.709744	0.66948	0.668193		10621	0.707616	0.0369967	0.0116994
10721	39110	50619	33063	44117	23733	42947	44117	66875	23310	47336													10721	0.771142	0.726888	0.733234	0.658099	0.703972	0.748453	0.693053	0.710786	0.671352	0.669126		10721	0.708611	0.0368252	0.0116452
10821	39143	50587	33063	44214	23733	43012	44214	66907	23277	47401													10821	0.771792	0.726428	0.733234	0.659546	0.703972	0.749586	0.694577	0.711126	0.670401	0.670045		10821	0.709071	0.0367755	0.0116294
10921	39208	50652	33096	44279	23798	43044	44214	67070	23342	47433													10921	0.773074	0.727361	0.733966	0.660516	0.7059	0.750144	0.694577	0.712858	0.672273	0.670497		10921	0.710117	0.0367587	0.0116241
11021	39240	50684	33128	44312	23830	43109	44312	67102	23375	47531													11021	0.773705	0.727821	0.734676	0.661008	0.706849	0.751277	0.696117	0.713199	0.673224	0.671883		11021	0.710976	0.036663	0.0115939
11121	39305	50717	33226	44377	23863	43174	44377	67232	23407	47563													11121	0.774987	0.728295	0.736849	0.661978	0.707828	0.752409	0.697138	0.71458	0.674145	0.672335		11121	0.712054	0.0368732	0.0116603
11221	39273	50814	33258	44442	23895	43239	44377	67265	23440	47661													11221	0.774356	0.729688	0.737559	0.662947	0.708777	0.753542	0.697138	0.714931	0.675096	0.67372		11221	0.712775	0.0365868	0.0115698
11321	39370	50814	33291	44507	23895	43239	44442	67330	23505	47693													11321	0.776268	0.729688	0.738291	0.663917	0.708777	0.753542	0.698159	0.715622	0.676968	0.674173		11321	0.71354	0.0365479	0.0115574
11421	39403	50879	33356	44572	23928	43337	44475	67427	23570	47758													11421	0.776919	0.730621	0.739732	0.664887	0.709756	0.75525	0.698677	0.716653	0.67884	0.675092		11421	0.714643	0.0365402	0.011555
11521	39435	50944	33388	44572	23928	43369	44540	67525	23537	47823													11521	0.77755	0.731555	0.740442	0.664887	0.709756	0.755808	0.699698	0.717694	0.677889	0.67601		11521	0.715129	0.0367825	0.0116317
11621	39500	50977	33453	44637	23993	43402	44605	67622	23602	47888													11621	0.778832	0.732028	0.741883	0.665856	0.711684	0.756383	0.700719	0.718725	0.679762	0.676929		11621	0.71628	0.0366945	0.0116038
11721	39533	51042	33486	44735	24058	43467	44670	67655	23635	47953													11721	0.779482	0.732962	0.742615	0.667318	0.713612	0.757516	0.701741	0.719076	0.680712	0.677848		11721	0.717288	0.0365487	0.0115577
11821	39533	51107	33518	44767	24090	43499	44670	67720	23668	47986													11821	0.779482	0.733895	0.743325	0.667795	0.714561	0.758073	0.701741	0.719767	0.681662	0.678314		11821	0.717862	0.0364767	0.0115349
11921	39598	51139	33551	44832	24090	43564	44735	67817	23668	48018													11921	0.780764	0.734355	0.744057	0.668765	0.714561	0.759206	0.702762	0.720798	0.681662	0.678767		11921	0.71857	0.0366909	0.0116027
12021	39630	51172	33616	44930	24090	43629	44800	67882	23700	48083													12021	0.781395	0.734829	0.745498	0.670227	0.714561	0.760339	0.703783	0.721489	0.682584	0.679686		12021	0.719439	0.0366072	0.0115762
12121	39695	51237	33616	44930	24155	43662	44832	67947	23733	48213													12121	0.782676	0.735762	0.745498	0.670227	0.716489	0.760914	0.704286	0.72218	0.683534	0.681523		12121	0.720309	0.0365931	0.0115718
12221	39695	51204	33648	44995	24220	43694	44897	68078	23733	48213													12221	0.782676	0.735288	0.746208	0.671197	0.718417	0.761472	0.705307	0.723572	0.683534	0.681523		12221	0.720919	0.0364897	0.0115391
12321	39728	51269	33713	45060	24188	43759	44930	68143	23830	48278													12321	0.783327	0.736222	0.747649	0.672166	0.717468	0.762604	0.705825	0.724263	0.686328	0.682442		12321	0.721829	0.0363281	0.011488
12421	39793	51367	33713	45125	24220	43759	44995	68175	23830	48311													12421	0.784609	0.737629	0.747649	0.673136	0.718417	0.762604	0.706846	0.724603	0.686328	0.682909		12421	0.722473	0.0363716	0.0115017
12521	39760	51399	33778	45190	24220	43824	45027	68273	23830	48343													12521	0.783958	0.738088	0.749091	0.674105	0.718417	0.763737	0.707349	0.725645	0.686328	0.683361		12521	0.723008	0.0363066	0.0114811
12621	39891	51432	33876	45190	24253	43857	45060	68305	23895	48408													12621	0.786541	0.738562	0.751264	0.674105	0.719396	0.764312	0.707867	0.725985	0.6882	0.68428		12621	0.724051	0.0367061	0.0116075
12721	39858	51432	33876	45255	24285	43954	45092	68435	23928	48473													12721	0.78589	0.738562	0.751264	0.675075	0.720345	0.766003	0.70837	0.727366	0.689151	0.685199		12721	0.724723	0.0364043	0.0115121
12821	39891	51497	33908	45287	24350	43987	45157	68468	23960	48538													12821	0.786541	0.739496	0.751974	0.675552	0.722273	0.766578	0.709391	0.727717	0.690072	0.686117		12821	0.725571	0.0363407	0.0114919
12921	39923	51562	33941	45385	24318	43987	45255	68533	23960	48571													12921	0.787172	0.740429	0.752706	0.677014	0.721324	0.766578	0.710931	0.728408	0.690072	0.686584		12921	0.726122	0.0362225	0.0114545
13021	39988	51562	33973	45352	24350	44019	45255	68598	24025	48668													13021	0.788454	0.740429	0.753415	0.676522	0.722273	0.767135	0.710931	0.729099	0.691944	0.687955		13021	0.726816	0.0362883	0.0114754
13121	40021	51627	34006	45450	24415	44052	45320	68663	24025	48636													13121	0.789104	0.741362	0.754147	0.677984	0.724201	0.767711	0.711952	0.72979	0.691944	0.687503		13121	0.72757	0.0363438	0.0114929
13221	40053	51659	34039	45482	24383	44117	45320	68728	24090	48766													13221	0.789735	0.741822	0.754879	0.678461	0.723252	0.768843	0.711952	0.730481	0.693816	0.68934		13221	0.728258	0.0362027	0.0114483
13321	40086	51692	34071	45580	24448	44214	45352	68825	24123	48799													13321	0.790386	0.742296	0.755589	0.679923	0.72518	0.770534	0.712454	0.731512	0.694767	0.689807		13321	0.729245	0.0361903	0.0114444
13421	40118	51725	34136	45580	24448	44182	45450	68890	24123	48831													13421	0.791017	0.74277	0.75703	0.679923	0.72518	0.769976	0.713994	0.732202	0.694767	0.690259		13421	0.729712	0.0362502	0.0114633
13521	40151	51757	34169	45645	24513	44214	45482	68988	24155	48896													13521	0.791667	0.743229	0.757762	0.680893	0.727108	0.770534	0.714497	0.733244	0.695688	0.691178		13521	0.73058	0.0361224	0.0114229
13621	40151	51790	34169	45677	24513	44247	45515	69020	24188	48961													13621	0.791667	0.743703	0.757762	0.68137	0.727108	0.771109	0.715015	0.733584	0.696639	0.692097		13621	0.731005	0.0359034	0.0113536
13721	40216	51855	34266	45775	24545	44312	45547	69053	24188	48994													13721	0.792949	0.744637	0.759913	0.682832	0.728057	0.772242	0.715518	0.733935	0.696639	0.692563		13721	0.731928	0.0361894	0.0114441
13821	40281	51855	34266	45775	24578	44377	45612	69118	24253	49026													13821	0.794231	0.744637	0.759913	0.682832	0.729036	0.773374	0.716539	0.734626	0.698511	0.693016		13821	0.732671	0.0362589	0.0114661
13921	40281	51887	34299	45873	24578	44377	45677	69215	24253	49059													13921	0.794231	0.745096	0.760645	0.684294	0.729036	0.773374	0.71756	0.735657	0.698511	0.693482		13921	0.733189	0.0360156	0.0113891
15321	40703	52375	34754	46490	24935	44865	46198	70061	24610	49676													15321	0.802551	0.752104	0.770735	0.693498	0.739626	0.781879	0.725745	0.744649	0.708793	0.702204		15321	0.742178	0.0357462	0.0113039
16321	40931	52700	35046	46815	25131	45222	46523	70548	24838	50099													16321	0.807047	0.756771	0.777211	0.698346	0.745439	0.788101	0.73085	0.749825	0.71536	0.708183		16321	0.747713	0.0356594	0.0112765
17321	41256	52960	35339	47205	25293	45580	46913	71036	25098	50489													17321	0.813455	0.760504	0.783709	0.704163	0.750245	0.79434	0.736977	0.755011	0.722848	0.713696		17321	0.753495	0.0356963	0.0112882
18321	41419	53285	35599	47628	25488	45808	47173	71556	25326	50847													18321	0.816669	0.765171	0.789475	0.710473	0.756029	0.798313	0.741061	0.760538	0.729414	0.718757		18321	0.75859	0.0349905	0.011065
19321	41646	53480	35827	47888	25651	46100	47563	72011	25488	51204													19321	0.821145	0.767972	0.794531	0.714352	0.760864	0.803402	0.747188	0.765374	0.73408	0.723803		19321	0.763271	0.0350094	0.011071
20321	41874	53773	36022	48213	25813	46360	47823	72434	25683	51562													20321	0.82564	0.772179	0.798856	0.7192	0.765669	0.807933	0.751272	0.76987	0.739696	0.728864		20321	0.767918	0.0347842	0.0109997
21321	42069	54000	36249	48473	26008	46620	48083	72824	25878	51855													21321	0.829485	0.775439	0.80389	0.723078	0.771453	0.812464	0.755357	0.774015	0.745313	0.733005		21321	0.77235	0.0347642	0.0109934
22321	42264	54195	36444	48831	26106	46783	48376	73247	26008	52147													22321	0.83333	0.778239	0.808214	0.728419	0.77436	0.815305	0.75996	0.778511	0.749057	0.737133		22321	0.776253	0.0343844	0.0108733
23321	42459	54455	36639	49059	26236	47043	48603	73604	26203	52407													23321	0.837175	0.781972	0.812539	0.73182	0.778216	0.819836	0.763526	0.782306	0.754673	0.740808		23321	0.780287	0.0344744	0.0109018
24321	42621	54618	36802	49286	26366	47270	48864	73995	26366	52667													24321	0.840369	0.784313	0.816154	0.735206	0.782072	0.823792	0.767626	0.786461	0.759368	0.744484		24321	0.783984	0.0343542	0.0108637
25321	42784	54813	36997	49546	26496	47433	49124	74287	26496	52992													25321	0.843583	0.787113	0.820478	0.739084	0.785928	0.826633	0.77171	0.789565	0.763112	0.749078		25321	0.787628	0.0340512	0.0107679
26321	42979	55041	37127	49806	26594	47661	49319	74580	26626	53188													26321	0.847428	0.790387	0.823361	0.742963	0.788835	0.830606	0.774774	0.792679	0.766856	0.751848		26321	0.790974	0.0341476	0.0107984
27321	43077	55171	37290	50034	26724	47856	49579	74905	26756	53480													27321	0.84936	0.792254	0.826976	0.746364	0.792691	0.834004	0.778858	0.796133	0.7706	0.755976		27321	0.794322	0.0337518	0.0106733
28321	43207	55398	37420	50229	26821	48018	49774	75230	26919	53643													28321	0.851923	0.795514	0.829859	0.749273	0.795568	0.836828	0.781922	0.799588	0.775294	0.75828		28321	0.797405	0.0336113	0.0106288
29321	43402	55528	37582	50489	26951	48181	49969	75490	27016	53870													29321	0.855768	0.797381	0.833452	0.753151	0.799425	0.839668	0.784985	0.802351	0.778088	0.761489		29321	0.800576	0.0336577	0.0106435
30321	43532	55658	37712	50619	27049	48311	50196	75815	27114	54065													30321	0.858332	0.799248	0.836335	0.75509	0.802331	0.841934	0.788551	0.805805	0.780911	0.764245		30321	0.803278	0.0336719	0.010648
31321	43629	55886	37875	50814	27146	48506	50359	76043	27276	54293													31321	0.860244	0.802522	0.839949	0.757999	0.805209	0.845332	0.791112	0.808229	0.785576	0.767468		31321	0.806364	0.0334762	0.0105861
32321	43759	56016	37972	51009	27211	48636	50554	76303	27374	54520													32321	0.862807	0.804388	0.842101	0.760908	0.807137	0.847598	0.794175	0.810992	0.788399	0.770677		32321	0.808918	0.0332248	0.0105066
33321	43922	56179	38135	51204	27309	48766	50749	76498	27504	54748													33321	0.866021	0.806729	0.845715	0.763817	0.810044	0.849863	0.797238	0.813065	0.792143	0.7739		33321	0.811854	0.0331773	0.0104916
34321	44052	56309	38167	51367	27374	48929	50912	76758	27601	54911													34321	0.868584	0.808596	0.846425	0.766248	0.811972	0.852704	0.799799	0.815828	0.794937	0.776204		34321	0.81413	0.0330642	0.0104558
35321	44149	56439	38362	51497	27504	49059	51009	77018	27731	55106													35321	0.870497	0.810463	0.85075	0.768188	0.815828	0.854969	0.801323	0.818592	0.798681	0.77896		35321	0.816825	0.0331662	0.0104881
36321	44279	56569	38362	51692	27569	49189	51302	77213	27829	55366													36321	0.87306	0.812329	0.85075	0.771097	0.817756	0.857235	0.805926	0.820664	0.801503	0.782636		36321	0.819296	0.0325484	0.0102927
37321	44377	56699	38493	51855	27634	49254	51399	77441	27894	55463													37321	0.874993	0.814196	0.853655	0.773528	0.819684	0.858368	0.807449	0.823087	0.803375	0.784007		37321	0.821234	0.0325679	0.0102989
38321	44442	56829	38525	51985	27666	49416	51562	77636	27991	55593													38321	0.876274	0.816063	0.854364	0.775467	0.820633	0.861191	0.81001	0.82516	0.806169	0.785845		38321	0.823118	0.0323704	0.0102364
39321	44540	56959	38688	52147	27764	49514	51725	77798	28089	55788													39321	0.878207	0.81793	0.857979	0.777884	0.82354	0.862899	0.812571	0.826882	0.808992	0.788601		39321	0.825548	0.0322544	0.0101997
40321	44637	57089	38753	52277	27861	49644	51855	78026	28219	55983													40321	0.880119	0.819797	0.859421	0.779823	0.826417	0.865164	0.814613	0.829305	0.812736	0.791357		40321	0.827875	0.032028	0.0101281
41321	44767	57219	38785	52407	27894	49709	52017	78123	28219	56113													41321	0.882682	0.821663	0.86013	0.781762	0.827396	0.866297	0.817158	0.830336	0.812736	0.793195		41321	0.829336	0.0320021	0.0101199
42321	44865	57284	38915	52570	27959	49806	52147	78319	28382	56244													42321	0.884615	0.822597	0.863013	0.784194	0.829324	0.867988	0.8192	0.832419	0.81743	0.795047		42321	0.831583	0.0318788	0.010081
43321	44897	57414	38948	52667	28024	49936	52245	78481	28447	56439													43321	0.885246	0.824464	0.863745	0.785641	0.831252	0.870253	0.82074	0.834141	0.819302	0.797803		43321	0.833259	0.0315504	0.00997713
44321	44995	57544	39013	52765	28089	50066	52407	78644	28479	56504													44321	0.887178	0.82633	0.865187	0.787103	0.83318	0.872519	0.823285	0.835874	0.820224	0.798722		44321	0.83496	0.0317743	0.0100479
45321	45092	57576	39143	52862	28122	50131	52505	78774	28577	56666													45321	0.88909	0.82679	0.86807	0.78855	0.834159	0.873652	0.824824	0.837255	0.823047	0.801012		45321	0.836645	0.0318307	0.0100657
46321	45157	57674	39143	52992	28219	50229	52602	78936	28609	56796													46321	0.890372	0.828197	0.86807	0.790489	0.837036	0.875359	0.826348	0.838977	0.823968	0.80285		46321	0.838167	0.0315629	0.00998107
47321	45287	57772	39208	53057	28284	50294	52700	79131	28674	56894													47321	0.892935	0.829605	0.869511	0.791458	0.838964	0.876492	0.827887	0.84105	0.82584	0.804235		47321	0.839798	0.0317931	0.0100539
48321	45320	57902	39273	53220	28317	50392	52960	79229	28804	57056													48321	0.893586	0.831471	0.870953	0.79389	0.839943	0.8782	0.831972	0.842091	0.829584	0.806525		48321	0.841822	0.0311847	0.00986146
49321	45417	57967	39338	53285	28349	50424	52992	79359	28869	57186													49321	0.895499	0.832405	0.872394	0.79486	0.840892	0.878758	0.832475	0.843473	0.831456	0.808363		49321	0.843057	0.0312284	0.00987529
50321	45482	58064	39338	53383	28382	50489	53122	79456	28902	57284													50321	0.89678	0.833798	0.872394	0.796321	0.841871	0.879891	0.834517	0.844504	0.832407	0.809748		50321	0.844223	0.0310184	0.00980888
51321	45580	58097	39338	53480	28447	50587	53253	79554	28934	57349													51321	0.898712	0.834272	0.872394	0.797768	0.843799	0.881598	0.836575	0.845546	0.833329	0.810667		51321	0.845466	0.0311027	0.00983553
52321	45645	58227	39435	53513	28479	50684	53318	79782	29032	57446													52321	0.899994	0.836138	0.874545	0.798261	0.844748	0.883289	0.837596	0.847969	0.836151	0.812038		52321	0.847073	0.0312907	0.00989497
53321	45645	58227	39468	53675	28512	50684	53383	79782	29064	57609													53321	0.899994	0.836138	0.875277	0.800677	0.845727	0.883289	0.838617	0.847969	0.837073	0.814342		53321	0.84791	0.0305837	0.00967142
54321	45742	58324	39533	53708	28577	50782	53513	79912	29129	57674													54321	0.901907	0.837531	0.876719	0.80117	0.847655	0.884997	0.840659	0.849351	0.838945	0.815261		54321	0.849419	0.0308971	0.00977052
55321	45808	58422	39565	53805	28577	50814	53643	80042	29162	57772													55321	0.903208	0.838939	0.877428	0.802616	0.847655	0.885554	0.842701	0.850732	0.839895	0.816646		55321	0.850538	0.0307066	0.00971029
56321	45905	58454	39598	53903	28674	50912	53675	80107	29259	57869													56321	0.905121	0.839398	0.87816	0.804078	0.850532	0.887262	0.843204	0.851423	0.842689	0.818017		56321	0.851989	0.0307792	0.00973325
57321	45970	58487	39598	53935	28674	50977	53805	80204	29259	57934													57321	0.906402	0.839872	0.87816	0.804556	0.850532	0.888395	0.845246	0.852454	0.842689	0.818936		57321	0.852724	0.0308927	0.00976914
58321	46003	58552	39630	54033	28707	51009	53870	80302	29324	58064													58321	0.907053	0.840805	0.87887	0.806018	0.851511	0.888953	0.846267	0.853496	0.844561	0.820774		58321	0.853831	0.0305328	0.00965531
59321	46003	58649	39663	54098	28739	51074	53935	80367	29357	58064													59321	0.907053	0.842198	0.879602	0.806987	0.85246	0.890086	0.847289	0.854187	0.845511	0.820774		59321	0.854615	0.0304438	0.00962717
60321	46100	58714	39728	54195	28804	51107	54033	80432	29422	58194													60321	0.908965	0.843132	0.881043	0.808434	0.854389	0.890661	0.848828	0.854877	0.847383	0.822611		60321	0.856032	0.0303796	0.00960688
61321	46165	58747	39695	54228	28837	51172	54098	80562	29422	58292													61321	0.910247	0.843606	0.880311	0.808926	0.855367	0.891793	0.849849	0.856259	0.847383	0.823997		61321	0.856774	0.030396	0.00961207
62321	46198	58812	39760	54293	28837	51237	54130	80627	29487	58324													62321	0.910898	0.844539	0.881753	0.809896	0.855367	0.892926	0.850352	0.85695	0.849255	0.824449		62321	0.857639	0.0304499	0.0096291
63321	46230	58844	39825	54390	28837	51237	54195	80692	29519	58422													63321	0.911529	0.844998	0.883194	0.811343	0.855367	0.892926	0.851373	0.857641	0.850177	0.825834		63321	0.858438	0.0302043	0.00955145
64321	46263	58909	39760	54423	28902	51302	54325	80757	29585	58519													64321	0.912179	0.845932	0.881753	0.811835	0.857295	0.894059	0.853415	0.858332	0.852078	0.827206		64321	0.859408	0.0299292	0.00946446
65321	46360	58974	39760	54455	28902	51334	54390	80822	29617	58552													65321	0.914092	0.846865	0.881753	0.812313	0.857295	0.894617	0.854436	0.859023	0.853	0.827672		65321	0.860107	0.0301427	0.00953197
66321	46360	58974	39825	54520	28934	51367	54455	80919	29650	58617													66321	0.914092	0.846865	0.883194	0.813282	0.858245	0.895192	0.855457	0.860054	0.85395	0.828591		66321	0.860892	0.0299932	0.00948469
67321	46393	59072	39858	54553	28934	51464	54520	80952	29682	58714													67321	0.914743	0.848272	0.883926	0.813774	0.858245	0.896882	0.856479	0.860404	0.854872	0.829962		67321	0.861756	0.0300319	0.00949692
68321	46425	59072	39858	54618	28967	51432	54553	80984	29715	58779													68321	0.915374	0.848272	0.883926	0.814744	0.859223	0.896325	0.856997	0.860744	0.855822	0.830881		68321	0.862231	0.0297575	0.00941015
69321	46490	59105	39858	54683	28999	51464	54618	81049	29747	58812													69321	0.916655	0.848746	0.883926	0.815714	0.860173	0.896882	0.858018	0.861435	0.856744	0.831347		69321	0.862964	0.0297774	0.00941644
70321	46490	59105	39891	54781	28999	51529	54716	81114	29812	58877													70321	0.916655	0.848746	0.884658	0.817176	0.860173	0.898015	0.859558	0.862126	0.858616	0.832266		70321	0.863799	0.0295429	0.00934229
71321	46490	59170	39956	54813	29032	51562	54813	81147	29812	58909													71321	0.916655	0.84968	0.8861	0.817653	0.861151	0.89859	0.861081	0.862477	0.858616	0.832718		71321	0.864472	0.0295048	0.00933024
72321	46555	59202	39891	54813	29064	51562	54846	81244	29845	58974													72321	0.917937	0.850139	0.884658	0.817653	0.862101	0.89859	0.8616	0.863508	0.859566	0.833637		72321	0.864939	0.0294674	0.0093184
73321	46555	59235	39988	54846	29097	51627	54846	81277	29910	59039													73321	0.917937	0.850613	0.886809	0.818145	0.86308	0.899723	0.8616	0.863859	0.861438	0.834556		73321	0.865776	0.0295071	0.00933097
74321	46555	59300	39956	54911	29064	51627	54911	81277	29910	59007													74321	0.917937	0.851547	0.8861	0.819115	0.862101	0.899723	0.862621	0.863859	0.861438	0.834104		74321	0.865854	0.0292783	0.0092586
75321	46588	59300	40021	54976	29097	51692	55008	81375	29942	59072													75321	0.918587	0.851547	0.887541	0.820084	0.86308	0.900856	0.864145	0.8649	0.86236	0.835023		75321	0.866812	0.0293276	0.00927419
76321	46653	59365	40021	55008	29097	51725	55041	81407	29975	59137													76321	0.919869	0.85248	0.887541	0.820562	0.86308	0.901431	0.864663	0.86524	0.86331	0.835941		76321	0.867412	0.0293832	0.0092918
77321	46653	59365	40053	55041	29162	51757	55106	81472	30007	59202													77321	0.919869	0.85248	0.888251	0.821054	0.865008	0.901988	0.865684	0.865931	0.864232	0.83686		77321	0.868136	0.0292552	0.00925131
78321	46685	59430	40021	55106	29129	51790	55138	81537	30007	59235													78321	0.9205	0.853413	0.887541	0.822024	0.864029	0.902564	0.866187	0.866622	0.864232	0.837327		78321	0.868444	0.0291231	0.00920952
79321	46718	59462	40086	55138	29194	51757	55203	81505	30072	59267													79321	0.921151	0.853873	0.888983	0.822501	0.865957	0.901988	0.867208	0.866282	0.866104	0.837779		79321	0.869183	0.029061	0.0091899
80321	46783	59430	40086	55138	29162	51822	55203	81602	30040	59332													80321	0.922432	0.853413	0.888983	0.822501	0.865008	0.903121	0.867208	0.867313	0.865182	0.838698		80321	0.869386	0.0293957	0.00929574
81321	46750	59462	40086	55171	29162	51855	55268	81635	30105	59365													81321	0.921782	0.853873	0.888983	0.822993	0.865008	0.903696	0.868229	0.867664	0.867055	0.839164		81321	0.869845	0.029135	0.00921329
82321	46750	59527	40151	55236	29194	51887	55333	81602	30105	59430													82321	0.921782	0.854806	0.890424	0.823963	0.865957	0.904254	0.86925	0.867313	0.867055	0.840083		82321	0.870489	0.0289588	0.00915758
83321	46815	59560	40118	55268	29194	51887	55366	81667	30137	59462													83321	0.923063	0.85528	0.889692	0.82444	0.865957	0.904254	0.869769	0.868004	0.867976	0.840535		83321	0.870897	0.0289708	0.00916139
84321	46815	59560	40151	55301	29227	51887	55398	81667	30170	59495													84321	0.923063	0.85528	0.890424	0.824932	0.866936	0.904254	0.870271	0.868004	0.868927	0.841002		84321	0.871309	0.0288527	0.00912401
85321	46783	59560	40151	55301	29227	51887	55431	81732	30170	59560													85321	0.922432	0.85528	0.890424	0.824932	0.866936	0.904254	0.87079	0.868695	0.868927	0.841921		85321	0.871459	0.0286112	0.00904766
86321	46848	59592	40151	55366	29227	51952	55463	81830	30170	59560													86321	0.923714	0.85574	0.890424	0.825902	0.866936	0.905387	0.871293	0.869736	0.868927	0.841921		86321	0.871998	0.0287969	0.00910638
87321	46880	59592	40183	55366	29259	51985	55496	81862	30202	59592													87321	0.924345	0.85574	0.891134	0.825902	0.867885	0.905962	0.871811	0.870076	0.869848	0.842373		87321	0.872508	0.0289624	0.00915872
88321	46880	59625	40151	55366	29227	51952	55561	81862	30235	59592													88321	0.924345	0.856214	0.890424	0.825902	0.866936	0.905387	0.872832	0.870076	0.870799	0.842373		88321	0.872529	0.0288189	0.00911335
89321	46848	59625	40216	55398	29259	51952	55626	81862	30235	59690													89321	0.923714	0.856214	0.891866	0.826379	0.867885	0.905387	0.873853	0.870076	0.870799	0.843758		89321	0.872993	0.0285333	0.00902302
90321	46880	59625	40248	55431	29259	51985	55658	81927	30300	59657													90321	0.924345	0.856214	0.892575	0.826872	0.867885	0.905962	0.874356	0.870767	0.872671	0.843292		90321	0.873494	0.0287302	0.00908528
101621	47010	59787	40378	55756	29324	52115	56048	82155	30462	60015													101621	0.926908	0.85854	0.895458	0.83172	0.869813	0.908227	0.880483	0.87319	0.877336	0.848352		101621	0.877003	0.0280809	0.00887997
111621	47108	59950	40476	56016	29324	52245	56406	82512	30495	60145													111621	0.92884	0.860881	0.897632	0.835598	0.869813	0.910493	0.886107	0.876985	0.878287	0.85019		111621	0.879483	0.027893	0.00882055
121621	47205	60112	40638	56244	29324	52277	56699	82707	30592	60340													121621	0.930753	0.863207	0.901224	0.838999	0.869813	0.911051	0.890709	0.879057	0.881081	0.852947		121621	0.881884	0.0276294	0.00873718
131621	47303	60210	40801	56341	29292	52375	57024	82968	30690	60567													131621	0.932685	0.864614	0.904839	0.840446	0.868864	0.912759	0.895815	0.881832	0.883903	0.856155		131621	0.884191	0.0279934	0.0088523
141621	47303	60405	40996	56601	29292	52472	57349	83228	30787	60763													141621	0.932685	0.867414	0.909163	0.844325	0.868864	0.914449	0.900921	0.884595	0.886697	0.858926		141621	0.886804	0.0275942	0.00872604
151621	47368	60535	41093	56829	29259	52537	57674	83520	30787	60958													151621	0.933967	0.869281	0.911315	0.847726	0.867885	0.915582	0.906026	0.887698	0.886697	0.861682		151621	0.888786	0.0275025	0.00869705
161621	47401	60763	41288	57024	29194	52602	57999	83910	30852	61153													161621	0.934618	0.872555	0.915639	0.850635	0.865957	0.916715	0.911132	0.891844	0.888569	0.864439		161621	0.89121	0.0276576	0.00874612
171621	47368	60860	41484	57251	29227	52732	58389	84268	30885	61445													171621	0.933967	0.873948	0.919986	0.854021	0.866936	0.91898	0.917258	0.895649	0.889519	0.868567		171621	0.893883	0.0275681	0.00871779
181621	47401	61120	41614	57511	29259	52797	58682	84593	30982	61640													181621	0.934618	0.877682	0.922869	0.857899	0.867885	0.920113	0.921861	0.899103	0.892313	0.871323		181621	0.896567	0.0272236	0.00860887
191621	47433	61283	41841	57739	29259	52895	59039	85016	31015	61900													191621	0.935249	0.880022	0.927903	0.8613	0.867885	0.921821	0.92747	0.903599	0.893263	0.874998		191621	0.899351	0.0276066	0.00872997
201621	47466	61445	42069	57934	29259	53057	59365	85406	31080	62161													201621	0.935899	0.882349	0.932959	0.864209	0.867885	0.924644	0.932591	0.907744	0.895136	0.878688		201621	0.90221	0.0282006	0.00891782
211621	47563	61673	42199	58162	29292	53220	59690	85764	31145	62421													211621	0.937812	0.885623	0.935842	0.86761	0.868864	0.927485	0.937696	0.911549	0.897008	0.882363		211621	0.905185	0.0284812	0.00900656
221621	47596	61835	42361	58422	29324	53350	60015	86219	31145	62746													221621	0.938462	0.887949	0.939435	0.871489	0.869813	0.92975	0.942802	0.916385	0.897008	0.886957		221621	0.908005	0.028728	0.00908459
231621	47596	62096	42524	58617	29357	53480	60340	86609	31210	62941													231621	0.938462	0.891697	0.94305	0.874398	0.870792	0.932016	0.947908	0.92053	0.89888	0.889713		231621	0.910745	0.0290678	0.00919204
241621	47563	62258	42654	58844	29389	53545	60633	87064	31243	63136													241621	0.937812	0.894023	0.945933	0.877784	0.871741	0.933149	0.95251	0.925366	0.89983	0.89247		241621	0.913062	0.0292834	0.00926021
251621	47596	62453	42784	58974	29389	53708	60925	87389	31275	63461													251621	0.938462	0.896824	0.948816	0.879723	0.871741	0.935989	0.957098	0.92882	0.900752	0.897064		251621	0.915529	0.0299367	0.00946682
261621	47661	62616	42947	59267	29487	53838	61153	87714	31243	63689													261621	0.939744	0.899164	0.952431	0.884094	0.874648	0.938255	0.960679	0.932275	0.89983	0.900287		261621	0.918141	0.0300395	0.00949932
271621	47726	62778	43044	59462	29519	54033	61510	88072	31275	63884													271621	0.941026	0.901491	0.954582	0.887003	0.875597	0.941653	0.966288	0.93608	0.900752	0.903043		271621	0.920751	0.0308461	0.00975441
281621	47856	62973	43207	59657	29552	54098	61640	88364	31243	64144													281621	0.943589	0.904291	0.958197	0.889912	0.876576	0.942786	0.96833	0.939183	0.89983	0.906719		281621	0.922941	0.0312212	0.009873
291621	47921	63103	43337	59885	29585	54195	61835	88755	31308	64306													291621	0.944871	0.906158	0.96108	0.893313	0.877555	0.944476	0.971393	0.943339	0.901702	0.909009		291621	0.925289	0.0315743	0.00998466
301621	47986	63266	43434	60015	29682	54390	61998	89080	31340	64469													301621	0.946152	0.908498	0.963231	0.895252	0.880432	0.947875	0.973954	0.946793	0.902624	0.911313		301621	0.927612	0.0317403	0.0100372
311621	47986	63461	43532	60275	29650	54488	62193	89372	31373	64664													311621	0.946152	0.911298	0.965404	0.89913	0.879483	0.949583	0.977017	0.949897	0.903574	0.914069		311621	0.929561	0.0321614	0.0101703
321621	47986	63591	43629	60372	29747	54585	62291	89697	31373	64891													321621	0.946152	0.913165	0.967555	0.900577	0.88236	0.951273	0.978557	0.953351	0.903574	0.917278		321621	0.931384	0.0321222	0.0101579
331621	47986	63754	43727	60502	29877	54683	62421	89957	31405	65022													331621	0.946152	0.915506	0.969729	0.902517	0.886216	0.952981	0.980599	0.956115	0.904496	0.91913		331621	0.933344	0.0318832	0.0100824
341621	48083	63884	43824	60698	29877	54846	62486	90250	31470	65152													341621	0.948065	0.917373	0.97188	0.90544	0.886216	0.955822	0.98162	0.959229	0.906368	0.920967		341621	0.935298	0.0321541	0.010168
351621	48181	64046	43922	60828	29942	54878	62518	90543	31568	65347													351621	0.949997	0.919699	0.974053	0.90738	0.888144	0.956379	0.982123	0.962343	0.90919	0.923724		351621	0.937303	0.031812	0.0100598
361621	48278	64241	43987	61023	30007	55008	62583	90770	31600	65509													361621	0.95191	0.922499	0.975495	0.910288	0.890072	0.958645	0.983144	0.964756	0.910112	0.926014		361621	0.939293	0.031604	0.00999407
371621	48343	64306	44052	61153	30072	55106	62681	91095	31665	65672													371621	0.953191	0.923433	0.976936	0.912228	0.892	0.960353	0.984683	0.96821	0.911984	0.928318		371621	0.941134	0.0316284	0.0100018
381621	48408	64566	44149	61283	30170	55236	62681	91290	31763	65834													381621	0.954473	0.927166	0.979087	0.914167	0.894907	0.962618	0.984683	0.970283	0.914807	0.930608		381621	0.94328	0.0309897	0.00979981
391621	48343	64696	44182	61380	30235	55366	62746	91550	31828	65997													391621	0.953191	0.929033	0.979819	0.915614	0.896835	0.964884	0.985704	0.973046	0.916679	0.932912		391621	0.944772	0.0307396	0.00972071
401621	48376	64891	44312	61608	30300	55431	62778	91778	31958	66192													401621	0.953842	0.931833	0.982702	0.919015	0.898763	0.966017	0.986207	0.975469	0.920423	0.935669		401621	0.946994	0.0301948	0.00954843
411621	48441	65054	44410	61738	30332	55496	62876	91941	32088	66354													411621	0.955124	0.934174	0.984875	0.920954	0.899712	0.967149	0.987747	0.977202	0.924167	0.937959		411621	0.948906	0.0300458	0.00950132
421621	48473	65184	44442	61868	30462	55593	62843	92233	32120	66582													421621	0.955754	0.936041	0.985585	0.922893	0.903568	0.96884	0.987228	0.980305	0.925089	0.941181		421621	0.950649	0.0293227	0.00927264
431621	48603	65314	44507	62030	30527	55691	62908	92428	32218	66712													431621	0.958318	0.937907	0.987027	0.92531	0.905496	0.970548	0.988249	0.982378	0.927911	0.943019		431621	0.952616	0.0290178	0.00917624
441621	48668	65477	44540	62096	30560	55788	62908	92656	32380	66907													441621	0.959599	0.940248	0.987758	0.926294	0.906475	0.972238	0.988249	0.984801	0.932577	0.945776		441621	0.954402	0.0286078	0.00904657
451621	48668	65704	44605	62291	30690	55951	62973	92818	32511	67102													451621	0.959599	0.943508	0.9892	0.929203	0.910331	0.975079	0.98927	0.986523	0.93635	0.948532		451621	0.95676	0.0277161	0.0087646
461621	48668	65834	44670	62421	30755	56016	62973	93013	32608	67265													461621	0.959599	0.945375	0.990641	0.931143	0.912259	0.976212	0.98927	0.988596	0.939143	0.950836		461621	0.958307	0.0272692	0.00862328
471621	48701	66029	44735	62518	30917	56048	63071	93176	32738	67427													471621	0.96025	0.948175	0.992083	0.932589	0.917065	0.976769	0.99081	0.990328	0.942888	0.953126		471621	0.960408	0.0263579	0.00833511
481621	48701	66192	44767	62648	30982	56179	63168	93404	32901	67590													481621	0.96025	0.950516	0.992793	0.934529	0.918993	0.979052	0.992334	0.992751	0.947582	0.95543		481621	0.962423	0.0260198	0.00822817
491621	48733	66289	44800	62778	31080	56244	63233	93469	33063	67817													491621	0.960881	0.951908	0.993524	0.936468	0.9219	0.980185	0.993355	0.993442	0.952248	0.958639		491621	0.964255	0.0251988	0.00796854
501621	48864	66452	44865	62908	31178	56276	63201	93599	33161	67980													501621	0.963464	0.954249	0.994966	0.938407	0.924806	0.980743	0.992852	0.994824	0.95507	0.960943		501621	0.966032	0.024395	0.00771437
511621	48929	66550	44865	63006	31340	56406	63298	93761	33323	68110													511621	0.964746	0.955656	0.994966	0.939869	0.929612	0.983008	0.994376	0.996546	0.959736	0.962781		511621	0.96813	0.0235379	0.00744333
521621	49026	66777	44897	63103	31470	56471	63331	93859	33486	68305													521621	0.966658	0.958916	0.995676	0.941316	0.933468	0.984141	0.994894	0.997587	0.964431	0.965537		521621	0.970262	0.0225626	0.00713492
531621	49059	66940	44897	63266	31600	56601	63331	93859	33583	68468													531621	0.967309	0.961257	0.995676	0.943747	0.937324	0.986407	0.994894	0.997587	0.967224	0.967841		531621	0.971927	0.0214089	0.00677008
541621	49059	67070	44930	63363	31698	56634	63428	93989	33746	68663													541621	0.967309	0.963124	0.996407	0.945194	0.940231	0.986982	0.996418	0.998969	0.971919	0.970598		541621	0.973715	0.0209362	0.00662061
551621	49091	67200	44962	63526	31828	56699	63461	93989	33811	68825													551621	0.96794	0.96499	0.997117	0.947626	0.944087	0.988115	0.996937	0.998969	0.973791	0.972888		551621	0.975246	0.0199366	0.0063045
561621	49156	67395	45027	63656	31958	56764	63461	94086	33941	68923													561621	0.969221	0.967791	0.998559	0.949565	0.947943	0.989247	0.996937	1	0.977535	0.974273		561621	0.977107	0.0191228	0.00604717
571621	49189	67427	45027	63754	32088	56796	63559	94054	34039	69118													571621	0.969872	0.96825	0.998559	0.951027	0.951799	0.989805	0.998476	0.99966	0.980358	0.97703		571621	0.978483	0.0183477	0.00580206
581621	49254	67655	44995	63884	32218	56894	63526	94054	34169	69248													581621	0.971154	0.971524	0.997849	0.952966	0.955655	0.991513	0.997958	0.99966	0.984102	0.978867		581621	0.980125	0.0171648	0.00542798
591621	49319	67687	45060	64046	32348	56894	63526	94054	34299	69345													591621	0.972435	0.971984	0.99929	0.955383	0.959511	0.991513	0.997958	0.99966	0.987846	0.980238		591621	0.981582	0.0163215	0.00516132
601621	49449	67817	45060	64176	32445	56926	63624	94086	34364	69476													601621	0.974999	0.97385	0.99929	0.957322	0.962388	0.992071	0.999497	1	0.989718	0.98209		601621	0.983123	0.0155869	0.004929
611621	49449	67980	45092	64274	32608	57056	63591	94021	34494	69573													611621	0.974999	0.976191	1	0.958784	0.967223	0.994336	0.998979	0.999309	0.993462	0.983461		611621	0.984674	0.0147805	0.00467399
621621	49449	68045	45092	64436	32738	57056	63656	94054	34494	69703													621621	0.974999	0.977125	1	0.961201	0.971079	0.994336	1	0.99966	0.993462	0.985299		621621	0.985716	0.013908	0.0043981
631621	49481	68143	45092	64534	32836	57154	63591	94021	34591	69801													631621	0.975629	0.978532	1	0.962662	0.973986	0.996044	0.998979	0.999309	0.996256	0.986684		631621	0.986808	0.0133078	0.0042083
641621	49546	68305	45092	64664	32966	57154	63656	93989	34656	69866													641621	0.976911	0.980858	1	0.964602	0.977842	0.996044	1	0.998969	0.998128	0.987603		641621	0.988096	0.0124735	0.00394447
651621	49611	68403	45060	64761	33096	57219	63624	93956	34689	70028													651621	0.978193	0.982265	0.99929	0.966049	0.981698	0.997177	0.999497	0.998618	0.999078	0.989893		651621	0.989176	0.0116416	0.00368141
661621	49676	68500	45060	64891	33161	57219	63656	94021	34689	70093													661621	0.979474	0.983658	0.99929	0.967988	0.983626	0.997177	1	0.999309	0.999078	0.990812		661621	0.990041	0.0109732	0.00347003
671621	49774	68533	44995	65022	33258	57251	63591	94021	34689	70158													671621	0.981407	0.984132	0.997849	0.969942	0.986504	0.997734	0.998979	0.999309	0.999078	0.991731		671621	0.990666	0.00995825	0.00314908
681621	49806	68630	44995	65152	33388	57284	63526	94021	34689	70223													681621	0.982038	0.985525	0.997849	0.971881	0.99036	0.99831	0.997958	0.999309	0.999078	0.992649		681621	0.991496	0.00918664	0.00290507
691621	49806	68760	45027	65249	33486	57316	63493	93989	34721	70223													691621	0.982038	0.987392	0.998559	0.973328	0.993267	0.998867	0.997439	0.998969	1	0.992649		691621	0.992251	0.00883708	0.00279453
701621	49871	68793	44962	65379	33518	57219	63428	93956	34721	70288													701621	0.983319	0.987866	0.997117	0.975267	0.994216	0.997177	0.996418	0.998618	1	0.993568		701621	0.992357	0.00787987	0.00249183
711621	49839	68890	44930	65444	33583	57284	63298	93989	34689	70288													711621	0.982688	0.989259	0.996407	0.976237	0.996144	0.99831	0.994376	0.998969	0.999078	0.993568		711621	0.992504	0.00762555	0.00241141
721621	49936	68923	44930	65574	33616	57381	63266	93989	34624	70353													721621	0.984601	0.989733	0.996407	0.978176	0.997123	1	0.993873	0.998969	0.997206	0.994487		721621	0.993058	0.00695091	0.00219807
731621	50001	68955	44897	65639	33681	57284	63266	93924	34656	70386													731621	0.985882	0.990192	0.995676	0.979146	0.999051	0.99831	0.993873	0.998278	0.998128	0.994954		731621	0.993349	0.00649752	0.0020547
741621	50066	69053	44865	65737	33681	57316	63136	93924	34624	70353													741621	0.987164	0.991599	0.994966	0.980608	0.999051	0.998867	0.991831	0.998278	0.997206	0.994487		741621	0.993406	0.00588758	0.00186182
751621	50131	69150	44865	65769	33713	57284	63103	93859	34624	70386													751621	0.988446	0.992992	0.994966	0.981085	1	0.99831	0.991313	0.997587	0.997206	0.994954		751621	0.993686	0.00562197	0.00177782
761621	50131	69150	44767	65899	33713	57316	63038	93891	34591	70451													761621	0.988446	0.992992	0.992793	0.983024	1	0.998867	0.990292	0.997927	0.996256	0.995872		761621	0.993647	0.00527052	0.00166668
771621	50164	69215	44767	65964	33681	57251	62908	93891	34591	70451													771621	0.989096	0.993926	0.992793	0.983994	0.999051	0.997734	0.988249	0.997927	0.996256	0.995872		771621	0.99349	0.00493936	0.00156196
781621	50099	69215	44702	66029	33681	57251	62876	93859	34559	70451													781621	0.987815	0.993926	0.991351	0.984964	0.999051	0.997734	0.987747	0.997587	0.995334	0.995872		781621	0.993138	0.00490153	0.00155
791621	50164	69248	44670	66094	33681	57186	62811	93859	34559	70516													791621	0.989096	0.9944	0.990641	0.985933	0.999051	0.996602	0.986726	0.997587	0.995334	0.996791		791621	0.993216	0.00473817	0.00149834
801621	50164	69345	44670	66159	33616	57219	62713	93826	34494	70516													801621	0.989096	0.995793	0.990641	0.986903	0.997123	0.997177	0.985186	0.997237	0.993462	0.996791		801621	0.992941	0.00464014	0.00146734
811621	50262	69378	44605	66192	33648	57186	62583	93794	34461	70548													811621	0.991029	0.996266	0.9892	0.987395	0.998072	0.996602	0.983144	0.996896	0.992512	0.997244		811621	0.992836	0.0050488	0.00159657
821621	50327	69378	44540	66289	33551	57154	62486	93729	34461	70613													821621	0.99231	0.996266	0.987758	0.988842	0.995195	0.996044	0.98162	0.996206	0.992512	0.998162		821621	0.992492	0.00509985	0.00161271
831621	50327	69443	44507	66322	33616	57154	62388	93761	34364	70581													831621	0.99231	0.9972	0.987027	0.989334	0.997123	0.996044	0.98008	0.996546	0.989718	0.99771		831621	0.992309	0.00578473	0.00182929
841621	50327	69476	44442	66354	33551	57089	62258	93696	34364	70613													841621	0.99231	0.997674	0.985585	0.989812	0.995195	0.994911	0.978038	0.995855	0.989718	0.998162		841621	0.991726	0.00622836	0.00196958
851621	50359	69476	44410	66419	33551	57056	62128	93664	34299	70613													851621	0.992941	0.997674	0.984875	0.990781	0.995195	0.994336	0.975996	0.995515	0.987846	0.998162		851621	0.991332	0.00683324	0.00216086
861621	50327	69541	44410	66517	33486	57024	62030	93631	34234	70678													861621	0.99231	0.998607	0.984875	0.992243	0.993267	0.993778	0.974456	0.995164	0.985974	0.999081		861621	0.990976	0.00740186	0.00234067
871621	50424	69541	44312	66517	33453	56926	61835	93566	34169	70678													871621	0.994223	0.998607	0.982702	0.992243	0.992288	0.992071	0.971393	0.994473	0.984102	0.999081		871621	0.990118	0.00845293	0.00267305
881621	50424	69541	44312	66550	33421	56959	61705	93566	34136	70743													881621	0.994223	0.998607	0.982702	0.992735	0.991339	0.992646	0.969351	0.994473	0.983151	1		881621	0.989923	0.00915719	0.00289576
891621	50489	69573	44182	66647	33421	56894	61640	93501	34039	70743													891621	0.995504	0.999067	0.979819	0.994182	0.991339	0.991513	0.96833	0.993782	0.980358	1		891621	0.989389	0.0100602	0.00318133
901621	50489	69606	44182	66680	33356	56894	61510	93436	33941	70743													901621	0.995504	0.99954	0.979819	0.994675	0.989411	0.991513	0.966288	0.993091	0.977535	1		901621	0.988738	0.0108563	0.00343306
911621	50522	69638	44117	66712	33323	56829	61315	93371	33843	70743													911621	0.996155	1	0.978378	0.995152	0.988432	0.99038	0.963224	0.992401	0.974713	1		911621	0.987883	0.0120818	0.00382059
921621	50554	69606	44052	66777	33323	56829	61185	93339	33713	70743													921621	0.996786	0.99954	0.976936	0.996122	0.988432	0.99038	0.961182	0.99206	0.970969	1		921621	0.987241	0.0132018	0.00417479
931621	50489	69638	44019	66842	33291	56764	61023	93274	33616	70678													931621	0.995504	1	0.976204	0.997091	0.987483	0.989247	0.958637	0.99137	0.968175	0.999081		931621	0.986279	0.0140779	0.00445182
941621	50489	69606	43954	66842	33258	56731	60893	93209	33486	70678													941621	0.995504	0.99954	0.974763	0.997091	0.986504	0.988672	0.956595	0.990679	0.964431	0.999081		941621	0.985286	0.0150856	0.00477048
951621	50554	69606	43954	66875	33258	56699	60795	93144	33356	70646													951621	0.996786	0.99954	0.974763	0.997583	0.986504	0.988115	0.955055	0.989988	0.960687	0.998629		951621	0.984765	0.016067	0.00508084
961621	50652	69606	43889	66940	33226	56731	60600	93111	33226	70646													961621	0.998718	0.99954	0.973321	0.998553	0.985555	0.988672	0.951992	0.989637	0.956942	0.998629		961621	0.984156	0.017671	0.00558805
971621	50652	69573	43824	66972	33226	56634	60470	93111	33063	70548													971621	0.998718	0.999067	0.97188	0.99903	0.985555	0.986982	0.94995	0.989637	0.952248	0.997244		971621	0.983031	0.018836	0.00595646
981621	50684	69573	43759	66972	33226	56601	60307	92948	32901	70548													981621	0.999349	0.999067	0.970438	0.99903	0.985555	0.986407	0.947389	0.987905	0.947582	0.997244		981621	0.981997	0.0202697	0.00640986
991621	50619	69573	43727	67005	33226	56569	60177	92948	32803	70483													991621	0.998068	0.999067	0.969729	0.999523	0.985555	0.985849	0.945347	0.987905	0.94476	0.996325		991621	0.981212	0.0210784	0.00666557
1001621	50587	69541	43629	67005	33258	56536	59982	92753	32641	70451													1001621	0.997437	0.998607	0.967555	0.999523	0.986504	0.985274	0.942284	0.985832	0.940094	0.995872		1001621	0.979898	0.0225025	0.00711591
1011621	50619	69541	43597	67005	33258	56504	59852	92753	32543	70451													1011621	0.998068	0.998607	0.966846	0.999523	0.986504	0.984716	0.940241	0.985832	0.937271	0.995872		1011621	0.979348	0.023522	0.00743831
1021621	50619	69573	43597	67037	33258	56504	59690	92688	32413	70451													1021621	0.998068	0.999067	0.966846	1	0.986504	0.984716	0.937696	0.985141	0.933527	0.995872		1021621	0.978744	0.0248092	0.00784535
1031621	50652	69508	43499	67037	33258	56439	59560	92623	32218	70418													1031621	0.998718	0.998133	0.964672	1	0.986504	0.983583	0.935654	0.98445	0.927911	0.995406		1031621	0.977503	0.0263394	0.00832926
1041621	50717	69476	43434	66972	33258	56406	59430	92461	32055	70418													1041621	1	0.997674	0.963231	0.99903	0.986504	0.983008	0.933612	0.982729	0.923216	0.995406		1041621	0.976441	0.0276916	0.00875685
1051621	50717	69443	43434	66972	33193	56439	59300	92428	31925	70418													1051621	1	0.9972	0.963231	0.99903	0.984576	0.983583	0.93157	0.982378	0.919472	0.995406		1051621	0.975645	0.0287429	0.00908929
1061621	50717	69443	43337	66907	33226	56374	59137	92331	31795	70321													1061621	1	0.9972	0.96108	0.998061	0.985555	0.982451	0.929009	0.981347	0.915728	0.994035		1061621	0.974446	0.0298853	0.00945055
1071621	50717	69443	43272	66875	33226	56341	58974	92233	31665	70353													1071621	1	0.9972	0.959638	0.997583	0.985555	0.981876	0.926448	0.980305	0.911984	0.994487		1071621	0.973508	0.0311562	0.00985246
1081621	50619	69378	43239	66810	33226	56309	58909	92136	31535	70288													1081621	0.998068	0.996266	0.958906	0.996614	0.985555	0.981318	0.925427	0.979274	0.90824	0.993568		1081621	0.972324	0.0317414	0.0100375
1091621	50619	69378	43174	66810	33226	56244	58747	92071	31438	70288													1091621	0.998068	0.996266	0.957465	0.996614	0.985555	0.980185	0.922882	0.978583	0.905446	0.993568		1091621	0.971463	0.0328021	0.0103729
1101621	50684	69378	43142	66745	33226	56244	58552	91941	31308	70288													1101621	0.999349	0.996266	0.956755	0.995644	0.985555	0.980185	0.919819	0.977202	0.901702	0.993568		1101621	0.970605	0.0341832	0.0108097
1111621	50684	69313	43044	66647	33226	56211	58422	91843	31210	70256													1111621	0.999349	0.995333	0.954582	0.994182	0.985555	0.97961	0.917777	0.97616	0.89888	0.993116		1111621	0.969454	0.0349835	0.0110628
1121621	50717	69345	43012	66582	33226	56113	58292	91811	31080	70288													1121621	1	0.995793	0.953872	0.993213	0.985555	0.977902	0.915735	0.97582	0.895136	0.993568		1121621	0.968659	0.036193	0.0114452
1131621	50717	69313	42947	66550	33226	56146	58129	91681	30950	70288													1131621	1	0.995333	0.952431	0.992735	0.985555	0.978477	0.913174	0.974438	0.891391	0.993568		1131621	0.96771	0.037435	0.011838
1141621	50717	69248	42914	66485	33226	56146	57967	91453	30852	70223													1141621	1	0.9944	0.951699	0.991766	0.985555	0.978477	0.910629	0.972015	0.888569	0.992649		1141621	0.966576	0.0382587	0.0120985
1151621	50619	69248	42849	66354	33193	56048	57772	91388	30755	70223													1151621	0.998068	0.9944	0.950257	0.989812	0.984576	0.976769	0.907566	0.971324	0.885775	0.992649		1151621	0.96512	0.0390044	0.0123343
1161621	50587	69280	42784	66322	33226	56048	57674	91290	30690	70223													1161621	0.997437	0.994859	0.948816	0.989334	0.985555	0.976769	0.906026	0.970283	0.883903	0.992649		1161621	0.964563	0.0397267	0.0125627
1171621	50619	69215	42751	66224	33161	55983	57544	91160	30625	70223													1171621	0.998068	0.993926	0.948084	0.987872	0.983626	0.975637	0.903984	0.968901	0.882031	0.992649		1171621	0.963478	0.0402256	0.0127205
1181621	50619	69183	42686	66127	33161	55951	57381	91063	30527	70223													1181621	0.998068	0.993466	0.946642	0.986425	0.983626	0.975079	0.901423	0.96787	0.879209	0.992649		1181621	0.962446	0.0411745	0.0130205
1191621	50587	69183	42654	66062	33128	55951	57284	90933	30495	70158													1191621	0.997437	0.993466	0.945933	0.985456	0.982648	0.975079	0.899899	0.966488	0.878287	0.991731		1191621	0.961642	0.0413907	0.0130889
1201621	50619	69150	42556	65932	33161	55918	57056	90835	30397	70158													1201621	0.998068	0.992992	0.943759	0.983517	0.983626	0.974504	0.896318	0.965447	0.875464	0.991731		1201621	0.960543	0.0426331	0.0134818
1211621	50652	69183	42524	65834	33128	55853	56894	90705	30332	70126													1211621	0.998718	0.993466	0.94305	0.982055	0.982648	0.973371	0.893773	0.964065	0.873592	0.991278		1211621	0.959602	0.0433719	0.0137154
1221621	50554	69085	42491	65769	33063	55853	56829	90608	30267	70126													1221621	0.996786	0.992059	0.942318	0.981085	0.98072	0.973371	0.892752	0.963034	0.87172	0.991278		1221621	0.958512	0.0434963	0.0137547
1231621	50457	69053	42394	65672	33063	55788	56699	90478	30300	70028													1231621	0.994874	0.991599	0.940167	0.979638	0.98072	0.972238	0.890709	0.961652	0.872671	0.989893		1231621	0.957416	0.0432434	0.0136748
1241621	50522	69053	42361	65574	33031	55756	56536	90445	30202	69996													1241621	0.996155	0.991599	0.939435	0.978176	0.97977	0.971681	0.888149	0.961301	0.869848	0.989441		1241621	0.956556	0.0442544	0.0139945
1251621	50489	68988	42296	65477	33096	55691	56374	90315	30202	69963													1251621	0.995504	0.990666	0.937993	0.976729	0.981698	0.970548	0.885604	0.95992	0.869848	0.988974		1251621	0.955749	0.0445572	0.0140902
1261621	50554	68923	42231	65379	33031	55593	56179	90250	30137	69898													1261621	0.996786	0.989733	0.936552	0.975267	0.97977	0.96884	0.882541	0.959229	0.867976	0.988055		1261621	0.954475	0.0452646	0.0143139
1271621	50489	68955	42166	65314	32998	55528	56081	90185	30040	69801													1271621	0.995504	0.990192	0.93511	0.974298	0.978792	0.967707	0.881001	0.958538	0.865182	0.986684		1271621	0.953301	0.045832	0.0144934
1281621	50424	68858	42166	65217	32933	55496	55853	90055	30072	69703													1281621	0.994223	0.988799	0.93511	0.972851	0.976864	0.967149	0.877419	0.957156	0.866104	0.985299		1281621	0.952097	0.0456805	0.0144454
1291621	50424	68825	42069	65119	32868	55463	55756	89990	30040	69703													1291621	0.994223	0.988325	0.932959	0.971389	0.974935	0.966574	0.875895	0.956465	0.865182	0.985299		1291621	0.951125	0.0459825	0.0145409
1301621	50392	68760	42036	64956	32868	55463	55528	89957	30040	69606													1301621	0.993592	0.987392	0.932227	0.968957	0.974935	0.966574	0.872314	0.956115	0.865182	0.983928		1301621	0.950122	0.0462933	0.0146392
1311621	50359	68793	41939	64859	32803	55366	55366	89827	30007	69443													1311621	0.992941	0.987866	0.930076	0.96751	0.973007	0.964884	0.869769	0.954733	0.864232	0.981624		1311621	0.948664	0.0465833	0.0147309
1321621	50327	68728	41906	64696	32803	55333	55236	89730	29975	69378													1321621	0.99231	0.986932	0.929344	0.965079	0.973007	0.964309	0.867727	0.953702	0.86331	0.980705		1321621	0.947643	0.0468179	0.0148051
1331621	50327	68663	41841	64566	32738	55268	55041	89632	29975	69215													1331621	0.99231	0.985999	0.927903	0.96314	0.971079	0.963176	0.864663	0.95266	0.86331	0.978401		1331621	0.946264	0.0469474	0.0148461
1341621	50294	68663	41809	64436	32673	55203	54976	89600	29910	69150													1341621	0.99166	0.985999	0.927193	0.961201	0.969151	0.962043	0.863642	0.95232	0.861438	0.977482		1341621	0.945213	0.0471654	0.014915
1351621	50294	68663	41679	64241	32608	55203	54748	89502	29942	69053													1351621	0.99166	0.985999	0.92431	0.958292	0.967223	0.962043	0.86006	0.951279	0.86236	0.976111		1351621	0.943934	0.0474777	0.0150138
1361621	50196	68598	41646	64111	32608	55138	54716	89405	29942	68923													1361621	0.989727	0.985066	0.923578	0.956352	0.967223	0.96091	0.859558	0.950248	0.86236	0.974273		1361621	0.94293	0.0470365	0.0148743
1371621	50164	68533	41581	63981	32478	55041	54553	89340	29942	68793													1371621	0.989096	0.984132	0.922137	0.954413	0.963367	0.95922	0.856997	0.949557	0.86236	0.972435		1371621	0.941372	0.0469544	0.0148483
1381621	50099	68565	41549	63819	32478	55073	54390	89242	29942	68695													1381621	0.987815	0.984592	0.921427	0.951997	0.963367	0.959778	0.854436	0.948515	0.86236	0.97105		1381621	0.940534	0.0472389	0.0149382
1391621	50066	68533	41419	63689	32413	54976	54325	89177	29942	68500													1391621	0.987164	0.984132	0.918544	0.950057	0.961439	0.958087	0.853415	0.947824	0.86236	0.968294		1391621	0.939132	0.0470219	0.0148696
1401621	50001	68565	41386	63591	32413	54878	54195	89015	30007	68403													1401621	0.985882	0.984592	0.917812	0.948596	0.961439	0.956379	0.851373	0.946103	0.864232	0.966923		1401621	0.938333	0.0468064	0.0148015
1411621	50066	68500	41321	63363	32348	54781	54098	88982	29975	68240													1411621	0.987164	0.983658	0.916371	0.945194	0.959511	0.954689	0.849849	0.945752	0.86331	0.964618		1411621	0.937012	0.0469877	0.0148588
1421621	49969	68533	41288	63201	32315	54748	54000	88852	29975	68045													1421621	0.985251	0.984132	0.915639	0.942778	0.958532	0.954114	0.84831	0.94437	0.86331	0.961862		1421621	0.93583	0.0468458	0.0148139
1431621	49936	68500	41158	63006	32250	54716	53968	88852	29975	67850													1431621	0.984601	0.983658	0.912756	0.939869	0.956604	0.953556	0.847807	0.94437	0.86331	0.959105		1431621	0.934564	0.0466267	0.0147447
1441621	49871	68565	41158	62876	32185	54585	53838	88755	29975	67622													1441621	0.983319	0.984592	0.912756	0.93793	0.954676	0.951273	0.845765	0.943339	0.86331	0.955883		1441621	0.933284	0.0465808	0.0147301
1451621	49774	68500	41061	62713	32120	54520	53773	88624	29975	67427													1451621	0.981407	0.983658	0.910605	0.935498	0.952748	0.95014	0.844744	0.941947	0.86331	0.953126		1451621	0.931718	0.0462067	0.0146118
1461621	49741	68500	40996	62551	32088	54488	53740	88559	29975	67297													1461621	0.980756	0.983658	0.909163	0.933082	0.951799	0.949583	0.844225	0.941256	0.86331	0.951288		1461621	0.930812	0.0461108	0.0145815
1471621	49676	68500	40931	62356	32023	54390	53675	88429	29975	67102													1471621	0.979474	0.983658	0.907722	0.930173	0.949871	0.947875	0.843204	0.939874	0.86331	0.948532		1471621	0.929369	0.0458931	0.0145127
1481621	49676	68500	40866	62291	31958	54325	53610	88364	29942	66972													1481621	0.979474	0.983658	0.90628	0.929203	0.947943	0.946742	0.842183	0.939183	0.86236	0.946694		1481621	0.928372	0.0460868	0.0145739
1491621	49709	68403	40768	62128	31925	54260	53610	88267	29942	66777													1491621	0.980125	0.982265	0.904107	0.926772	0.946964	0.945609	0.842183	0.938152	0.86236	0.943938		1491621	0.927248	0.0458602	0.0145023
1501621	49644	68468	40736	61933	31925	54195	53545	88104	29975	66647													1501621	0.978843	0.983199	0.903397	0.923863	0.946964	0.944476	0.841162	0.93642	0.86331	0.9421		1501621	0.926374	0.0457704	0.0144739
1511621	49579	68468	40671	61803	31893	54098	53513	88007	29975	66517													1511621	0.977562	0.983199	0.901956	0.921924	0.946015	0.942786	0.840659	0.935389	0.86331	0.940263		1511621	0.925306	0.0455914	0.0144173
1521621	49546	68468	40606	61705	31795	54065	53448	87909	30007	66387													1521621	0.976911	0.983199	0.900515	0.920462	0.943108	0.942211	0.839638	0.934347	0.864232	0.938425		1521621	0.924305	0.0454218	0.0143636
1531621	49481	68468	40573	61575	31795	53935	53383	87844	29975	66289													1531621	0.975629	0.983199	0.899783	0.918523	0.943108	0.939945	0.838617	0.933656	0.86331	0.93704		1531621	0.923281	0.0455065	0.0143904
1541621	49449	68468	40476	61478	31795	53935	53318	87779	29975	66127													1541621	0.974999	0.983199	0.897632	0.917076	0.943108	0.939945	0.837596	0.932966	0.86331	0.93475		1541621	0.922458	0.045691	0.0144488
1551621	49449	68403	40508	61348	31730	53870	53318	87649	29975	66029													1551621	0.974999	0.982265	0.898341	0.915136	0.94118	0.938812	0.837596	0.931584	0.86331	0.933364		1551621	0.921659	0.0453217	0.014332
1561621	49384	68370	40411	61250	31763	53838	53285	87649	30040	65932													1561621	0.973717	0.981792	0.89619	0.913675	0.942159	0.938255	0.837077	0.931584	0.865182	0.931993		1561621	0.921162	0.0450685	0.0142519
1571621	49384	68435	40378	61185	31698	53708	53188	87584	30040	65834													1571621	0.973717	0.982725	0.895458	0.912705	0.940231	0.935989	0.835554	0.930893	0.865182	0.930608		1571621	0.920306	0.0453466	0.0143398
1581621	49286	68435	40346	61055	31665	53740	53090	87487	30040	65737													1581621	0.971785	0.982725	0.894749	0.910766	0.939252	0.936547	0.834014	0.929862	0.865182	0.929237		1581621	0.919412	0.045413	0.0143609
1591621	49254	68435	40313	60958	31633	53643	53090	87454	30072	65639													1591621	0.971154	0.982725	0.894017	0.909319	0.938303	0.934856	0.834014	0.929511	0.866104	0.927852		1591621	0.918785	0.0451316	0.0142719
1601621	49156	68370	40248	60893	31568	53643	53025	87389	30040	65542													1601621	0.969221	0.981792	0.892575	0.908349	0.936375	0.934856	0.832993	0.92882	0.865182	0.92648		1601621	0.917664	0.0450408	0.0142432
1611621	49124	68403	40216	60828	31600	53643	52862	87324	30105	65412													1611621	0.96859	0.982265	0.891866	0.90738	0.937324	0.934856	0.830432	0.92813	0.867055	0.924643		1611621	0.917254	0.0453964	0.0143556
1621621	49059	68338	40183	60763	31535	53578	52862	87292	30105	65314													1621621	0.967309	0.981332	0.891134	0.90641	0.935396	0.933724	0.830432	0.927789	0.867055	0.923257		1621621	0.916384	0.0449805	0.0142241
1631621	49026	68370	40118	60698	31503	53513	52765	87227	30105	65217													1631621	0.966658	0.981792	0.889692	0.90544	0.934447	0.932591	0.828909	0.927099	0.867055	0.921886		1631621	0.915557	0.0452774	0.014318
1641621	48961	68338	40118	60633	31503	53513	52602	87227	30137	65152													1641621	0.965377	0.981332	0.889692	0.904471	0.934447	0.932591	0.826348	0.927099	0.867976	0.920967		1641621	0.91503	0.0454962	0.0143872
1651621	48929	68338	40053	60567	31438	53448	52537	87161	30137	65022													1651621	0.964746	0.981332	0.888251	0.903486	0.932519	0.931458	0.825327	0.926397	0.867976	0.91913		1651621	0.914062	0.0455718	0.0144111
1661621	48766	68305	40021	60567	31438	53448	52407	87096	30202	64989													1661621	0.961532	0.980858	0.887541	0.903486	0.932519	0.931458	0.823285	0.925706	0.869848	0.918663		1661621	0.91349	0.0453658	0.0143459
1671621	48733	68240	39988	60502	31438	53350	52310	86999	30202	64924													1671621	0.960881	0.979925	0.886809	0.902517	0.932519	0.92975	0.821761	0.924675	0.869848	0.917745		1671621	0.912643	0.0454278	0.0143655
1681621	48701	68240	39923	60470	31405	53350	52147	86999	30235	64794													1681621	0.96025	0.979925	0.885368	0.902039	0.93154	0.92975	0.8192	0.924675	0.870799	0.915907		1681621	0.911945	0.0458651	0.0145038
1691621	48603	68208	39891	60372	31373	53285	52082	86869	30267	64729													1691621	0.958318	0.979465	0.884658	0.900577	0.930591	0.928617	0.818179	0.923294	0.87172	0.914988		1691621	0.911041	0.0456421	0.0144333
1701621	48603	68175	39858	60340	31405	53285	52017	86901	30267	64696													1701621	0.958318	0.978991	0.883926	0.9001	0.93154	0.928617	0.817158	0.923634	0.87172	0.914522		1701621	0.910853	0.0459068	0.014517
1711621	48506	68110	39825	60340	31340	53253	51920	86901	30267	64566													1711621	0.956405	0.978058	0.883194	0.9001	0.929612	0.92806	0.815634	0.923634	0.87172	0.912684		1711621	0.90991	0.0457966	0.0144821
1721621	48473	68045	39760	60307	31373	53188	51855	86869	30267	64534													1721621	0.955754	0.977125	0.881753	0.899608	0.930591	0.926927	0.814613	0.923294	0.87172	0.912232		1721621	0.909362	0.0458951	0.0145133
1731621	48311	67980	39695	60372	31405	53188	51725	86804	30267	64469													1731621	0.95256	0.976191	0.880311	0.900577	0.93154	0.926927	0.812571	0.922603	0.87172	0.911313		1731621	0.908631	0.0459625	0.0145346
1741621	48311	67882	39728	60275	31340	53155	51627	86771	30202	64371													1741621	0.95256	0.974784	0.881043	0.89913	0.929612	0.926352	0.811031	0.922252	0.869848	0.909927		1741621	0.907654	0.0460906	0.0145751
1751621	48181	67850	39695	60242	31373	53090	51562	86674	30170	64306													1751621	0.949997	0.974324	0.880311	0.898638	0.930591	0.925219	0.81001	0.921221	0.868927	0.909009		1751621	0.906825	0.0460852	0.0145734
1761621	48116	67817	39663	60275	31438	53090	51432	86674	30105	64176													1761621	0.948715	0.97385	0.879602	0.89913	0.932519	0.925219	0.807968	0.921221	0.867055	0.907171		1761621	0.906245	0.046672	0.014759
1771621	48083	67752	39630	60177	31438	53057	51367	86576	30105	64144													1771621	0.948065	0.972917	0.87887	0.897668	0.932519	0.924644	0.806947	0.920179	0.867055	0.906719		1771621	0.905558	0.0467042	0.0147692
1781621	48051	67687	39630	60210	31405	53025	51269	86511	30040	64079													1781621	0.947434	0.971984	0.87887	0.898161	0.93154	0.924086	0.805407	0.919489	0.865182	0.9058		1781621	0.904795	0.0469041	0.0148324
1791621	47986	67622	39598	60145	31438	53057	51204	86479	30007	64046													1791621	0.946152	0.97105	0.87816	0.897191	0.932519	0.924644	0.804386	0.919148	0.864232	0.905333		1791621	0.904282	0.0470944	0.0148926
1801621	47888	67557	39533	60145	31535	53025	51107	86414	29942	63949													1801621	0.94422	0.970117	0.876719	0.897191	0.935396	0.924086	0.802862	0.918458	0.86236	0.903962		1801621	0.903537	0.0475377	0.0150327
1811621	47856	67427	39500	60080	31535	52992	51042	86316	29942	63949													1811621	0.943589	0.96825	0.875987	0.896221	0.935396	0.923511	0.801841	0.917416	0.86236	0.903962		1811621	0.902853	0.0474273	0.0149978
1821621	47726	67362	39468	60015	31600	52992	50977	86316	29845	63819													1821621	0.941026	0.967317	0.875277	0.895252	0.937324	0.923511	0.80082	0.917416	0.859566	0.902125		1821621	0.901963	0.0477669	0.0151052
1831621	47726	67330	39403	59982	31633	52992	50912	86284	29812	63786													1831621	0.941026	0.966857	0.873836	0.89476	0.938303	0.923511	0.799799	0.917076	0.858616	0.901658		1831621	0.901544	0.048199	0.0152419
1841621	47628	67200	39338	59917	31665	52992	50847	86154	29747	63689													1841621	0.939093	0.96499	0.872394	0.89379	0.939252	0.923511	0.798778	0.915694	0.856744	0.900287		1841621	0.900453	0.0483133	0.015278
1851621	47596	67167	39338	59885	31665	52927	50782	86121	29715	63656													1851621	0.938462	0.964516	0.872394	0.893313	0.939252	0.922378	0.797757	0.915343	0.855822	0.89982		1851621	0.899906	0.0484548	0.0153227
1861621	47563	67102	39273	59820	31730	52992	50684	85991	29715	63591													1861621	0.937812	0.963583	0.870953	0.892343	0.94118	0.923511	0.796217	0.913962	0.855822	0.898902		1861621	0.899428	0.0489205	0.01547
1871621	47498	67037	39208	59690	31698	52895	50652	85959	29617	63526													1871621	0.93653	0.96265	0.869511	0.890404	0.940231	0.921821	0.795714	0.913622	0.853	0.897983		1871621	0.898146	0.0490074	0.0154975
1881621	47336	67005	39110	59690	31698	52927	50619	85829	29585	63461													1881621	0.933336	0.96219	0.867338	0.890404	0.940231	0.922378	0.795196	0.91224	0.852078	0.897064		1881621	0.897246	0.0490125	0.0154991
1891621	47270	66875	39078	59625	31730	52927	50587	85731	29552	63396													1891621	0.932035	0.960323	0.866628	0.889434	0.94118	0.922378	0.794693	0.911198	0.851128	0.896145		1891621	0.896514	0.0489714	0.0154861
1901621	47238	66810	39013	59527	31698	52862	50522	85666	29552	63331													1901621	0.931404	0.95939	0.865187	0.887972	0.940231	0.921246	0.793672	0.910507	0.851128	0.895226		1901621	0.895596	0.0489595	0.0154823
1911621	47173	66745	39013	59495	31730	52862	50587	85536	29519	63298													1911621	0.930122	0.958457	0.865187	0.887495	0.94118	0.921246	0.794693	0.909126	0.850177	0.89476		1911621	0.895244	0.0486443	0.0153827
1921621	47173	66680	38883	59397	31698	52797	50554	85471	29454	63233													1921621	0.930122	0.957523	0.862304	0.886033	0.940231	0.920113	0.794175	0.908435	0.848305	0.893841		1921621	0.894108	0.0488633	0.0154519
1931621	47140	66647	38850	59300	31665	52797	50522	85373	29487	63233													1931621	0.929471	0.957049	0.861572	0.884586	0.939252	0.920113	0.793672	0.907393	0.849255	0.893841		1931621	0.893621	0.0487043	0.0154016
1941621	47010	66582	38753	59267	31665	52830	50489	85308	29519	63233													1941621	0.926908	0.956116	0.859421	0.884094	0.939252	0.920688	0.793154	0.906702	0.850177	0.893841		1941621	0.893035	0.0485771	0.0153614
1951621	46945	66485	38720	59202	31665	52797	50587	85211	29487	63168													1951621	0.925627	0.954723	0.858689	0.883124	0.939252	0.920113	0.794693	0.905671	0.849255	0.892922		1951621	0.892407	0.0480257	0.015187
1961621	46815	66387	38655	59137	31665	52765	50554	85113	29519	63168													1961621	0.923063	0.953316	0.857247	0.882155	0.939252	0.919555	0.794175	0.90463	0.850177	0.892922		1961621	0.891649	0.0477252	0.015092
1971621	46783	66354	38558	59105	31633	52797	50522	85048	29552	63168													1971621	0.922432	0.952842	0.855096	0.881677	0.938303	0.920113	0.793672	0.903939	0.851128	0.892922		1971621	0.891212	0.0477338	0.0150948
1981621	46750	66289	38493	59007	31633	52732	50554	84983	29552	63136													1981621	0.921782	0.951908	0.853655	0.880215	0.938303	0.91898	0.794175	0.903248	0.851128	0.89247		1981621	0.890586	0.0474975	0.01502
1991621	46620	66257	38428	58909	31568	52732	50554	84853	29617	63103													1991621	0.919218	0.951449	0.852213	0.878754	0.936375	0.91898	0.794175	0.901866	0.853	0.892003		1991621	0.889803	0.0469874	0.0148587
2001621	46653	66224	38362	58844	31535	52732	50522	84853	29650	63103													2001621	0.919869	0.950975	0.85075	0.877784	0.935396	0.91898	0.793672	0.901866	0.85395	0.892003		2001621	0.889525	0.0470482	0.0148779

## Sheet: Fig3A Acetabularia
					Original data (arbitrary units)														Maxima													Normalized to maximum										Averaged data (shown in Fig. 3A)
Time (ms)	Acetabularia 1	Acetabularia 2	Acetabularia 3	Acetabularia 4	Acetabularia 5	Acetabularia 6	Acetabularia 7	Acetabularia 8	Acetabularia 9	Acetabularia 10	Acetabularia 11	Acetabularia 12		max1	max2	max3	max4	max5	max6	max7	max8	max9	max10	max11	max12		Time (ms)	Acetabularia 1	Acetabularia 2	Acetabularia 3	Acetabularia 4	Acetabularia 5	Acetabularia 6	Acetabularia 7	Acetabularia 8	Acetabularia 9	Acetabularia 10	Acetabularia 11	Acetabularia 12		Time (ms)	Average	stdev	SE	n
11	260	260	227	227	227	227	227	227	227	227	227	227		119087	119868	54260	42459	44084	30235	58747	29129	35534	86121	29097	31503		11	0.00218328	0.00216905	0.00418356	0.00534633	0.00514926	0.00750786	0.00386403	0.00779292	0.00638825	0.00263583	0.00780149	0.00720566		11	0.00518563	0.00217326	0.000627365	12
21	25716	26463	10143	9493	9558	6209	11573	5917	6924	18888	6177	7087															21	0.215943	0.220768	0.186933	0.22358	0.216813	0.205358	0.196997	0.203131	0.194856	0.219319	0.21229	0.224963		21	0.210079	0.0124215	0.00358579
31	27179	28056	10663	9948	10013	6534	12126	6209	7249	19961	6469	7477															31	0.228228	0.234057	0.196517	0.234297	0.227135	0.216107	0.206411	0.213155	0.204002	0.231779	0.222325	0.237342		31	0.220946	0.0135138	0.0039011
41	27796	28804	10826	10143	10208	6664	12354	6274	7347	20416	6567	7575															41	0.233409	0.240298	0.199521	0.238889	0.231558	0.220407	0.210292	0.215387	0.20676	0.237062	0.225693	0.240453		41	0.224977	0.0142611	0.00411682
51	28187	29422	10988	10273	10371	6664	12484	6339	7445	20742	6664	7672															51	0.236693	0.245453	0.202506	0.241951	0.235255	0.220407	0.212504	0.217618	0.209518	0.240847	0.229027	0.243532		51	0.227943	0.0148686	0.00429221
61	28642	29910	11118	10468	10533	6762	12679	6404	7477	21099	6762	7802															61	0.240513	0.249524	0.204902	0.246544	0.23893	0.223648	0.215824	0.21985	0.210418	0.244993	0.232395	0.247659		61	0.231267	0.0157421	0.00454436
71	29097	30560	11183	10598	10663	6794	12776	6469	7607	21489	6827	7900															71	0.244334	0.254947	0.2061	0.249606	0.241879	0.224706	0.217475	0.222081	0.214077	0.249521	0.234629	0.25077		71	0.234177	0.016652	0.00480701
81	29519	31178	11378	10728	10826	6859	12971	6502	7672	21847	6892	7997															81	0.247878	0.260103	0.209694	0.252667	0.245577	0.226856	0.220794	0.223214	0.215906	0.253678	0.236863	0.253849		81	0.237257	0.017264	0.00498369
91	29975	31730	11541	10858	10956	6924	13101	6567	7705	22205	7022	8127															91	0.251707	0.264708	0.212698	0.255729	0.248526	0.229006	0.223007	0.225445	0.216835	0.257835	0.241331	0.257975		91	0.2404	0.0181212	0.00523114
101	30430	32348	11638	11021	11086	6957	13231	6664	7802	22562	7054	8225															101	0.255527	0.269864	0.214486	0.259568	0.251474	0.230098	0.22522	0.228775	0.219564	0.26198	0.24243	0.261086		101	0.243339	0.0189699	0.00547614
111	30852	32966	11768	11151	11281	7022	13394	6697	7900	22887	7119	8322															111	0.259071	0.275019	0.216882	0.26263	0.255898	0.232247	0.227995	0.229908	0.222322	0.265754	0.244664	0.264165		111	0.24638	0.019745	0.00569989
121	31340	33518	11899	11313	11411	7087	13557	6762	7965	23277	7184	8452															121	0.263169	0.279624	0.219296	0.266445	0.258847	0.234397	0.230769	0.23214	0.224152	0.270283	0.246898	0.268292		121	0.249526	0.0206613	0.00596439
131	31795	34136	12029	11476	11541	7119	13654	6827	8030	23602	7282	8582															131	0.26699	0.28478	0.221692	0.270284	0.261796	0.235456	0.23242	0.234371	0.225981	0.274056	0.250266	0.272418		131	0.252543	0.0217335	0.00627392
141	32185	34721	12159	11606	11703	7217	13849	6859	8095	23993	7347	8647															141	0.270265	0.28966	0.224088	0.273346	0.26547	0.238697	0.23574	0.23547	0.22781	0.278596	0.2525	0.274482		141	0.25551	0.0224278	0.00647434
151	32673	35339	12354	11768	11834	7249	14012	6892	8160	24318	7445	8745															151	0.274362	0.294816	0.227682	0.277161	0.268442	0.239755	0.238514	0.236603	0.229639	0.28237	0.255868	0.277593		151	0.258567	0.0232999	0.00672611
161	33128	35924	12451	11899	11996	7314	14142	6957	8225	24675	7510	8908															161	0.278183	0.299696	0.229469	0.280247	0.272117	0.241905	0.240727	0.238834	0.231468	0.286515	0.258102	0.282767		161	0.261669	0.0243978	0.00704304
171	33583	36542	12581	12061	12126	7347	14337	7022	8322	25098	7607	8973															171	0.282004	0.304852	0.231865	0.284062	0.275066	0.242997	0.244047	0.241066	0.234198	0.291427	0.261436	0.28483		171	0.264821	0.0252058	0.0072763
181	34006	37127	12711	12191	12256	7477	14434	7087	8387	25456	7672	9103															181	0.285556	0.309732	0.234261	0.287124	0.278015	0.247296	0.245698	0.243297	0.236027	0.295584	0.26367	0.288957		181	0.267935	0.025992	0.00750325
191	34461	37712	12841	12354	12419	7445	14597	7119	8485	25813	7802	9200															191	0.289377	0.314613	0.236657	0.290963	0.281712	0.246238	0.248472	0.244396	0.238785	0.299729	0.268138	0.292036		191	0.270926	0.0270937	0.00782127
201	34916	38330	12971	12484	12581	7575	14727	7152	8517	26138	7835	9298															201	0.293197	0.319768	0.239053	0.294025	0.285387	0.250537	0.250685	0.245529	0.239686	0.303503	0.269272	0.295146		201	0.273816	0.0280211	0.00808898
211	35306	38915	13101	12646	12679	7575	14922	7249	8582	26496	7867	9363															211	0.296472	0.324649	0.241449	0.29784	0.28761	0.250537	0.254004	0.248859	0.241515	0.30766	0.270372	0.29721		211	0.276515	0.0288099	0.00831671
221	35827	39500	13264	12809	12841	7640	15052	7249	8647	26854	7965	9493															221	0.300847	0.329529	0.244453	0.301679	0.291285	0.252687	0.256217	0.248859	0.243344	0.311817	0.27374	0.301336		221	0.279649	0.0299682	0.00865107
231	36184	40053	13362	12939	12971	7705	15150	7314	8745	27179	8030	9558															231	0.303845	0.334143	0.246259	0.304741	0.294234	0.254837	0.257886	0.25109	0.246102	0.315591	0.275973	0.3034		231	0.282342	0.0306371	0.00884416
241	36639	40638	13524	13069	13101	7737	15345	7412	8777	27471	8095	9655															241	0.307666	0.339023	0.249244	0.307803	0.297183	0.255895	0.261205	0.254454	0.247003	0.318981	0.278207	0.306479		241	0.285262	0.0313783	0.00905813
251	37030	41158	13622	13231	13231	7802	15475	7445	8875	27829	8192	9720															251	0.310949	0.343361	0.25105	0.311618	0.300132	0.258045	0.263418	0.255587	0.249761	0.323138	0.281541	0.308542		251	0.288095	0.0321565	0.00928279
261	37517	41776	13752	13362	13362	7835	15605	7477	8940	28154	8257	9850															261	0.315039	0.348517	0.253446	0.314704	0.303103	0.259137	0.265631	0.256686	0.25159	0.326912	0.283775	0.312669		261	0.290934	0.0333105	0.00961592
271	37875	42329	13914	13524	13492	7932	15735	7542	8940	28512	8355	9980															271	0.318045	0.35313	0.256432	0.318519	0.306052	0.262345	0.267843	0.258917	0.25159	0.331069	0.287143	0.316795		271	0.29399	0.0342301	0.00988137
281	38362	42849	14044	13654	13589	7932	15897	7575	9070	28804	8387	10045															281	0.322134	0.357468	0.258828	0.321581	0.308252	0.262345	0.270601	0.26005	0.255248	0.33446	0.288243	0.318859		281	0.296506	0.0349509	0.0100895
291	38753	43369	14142	13752	13752	7997	16060	7640	9135	29129	8485	10110															291	0.325418	0.361806	0.260634	0.323889	0.31195	0.264495	0.273376	0.262282	0.257078	0.338233	0.291611	0.320922		291	0.299308	0.0355833	0.010272
301	39175	43889	14272	13849	13882	8095	16190	7705	9200	29454	8550	10208															301	0.328961	0.366144	0.26303	0.326173	0.314899	0.267736	0.275589	0.264513	0.258907	0.342007	0.293845	0.324033		301	0.302153	0.0361775	0.0104435
311	39565	44410	14434	13979	14012	8095	16288	7737	9265	29747	8647	10305															311	0.332236	0.370491	0.266015	0.329235	0.317848	0.267736	0.277257	0.265612	0.260736	0.345409	0.297178	0.327112		311	0.304739	0.0371169	0.0107147
321	39988	44930	14499	14142	14109	8160	16418	7802	9363	30072	8680	10436															321	0.335788	0.374829	0.267213	0.333074	0.320048	0.269886	0.27947	0.267843	0.263494	0.349183	0.298313	0.33127		321	0.307534	0.0379767	0.0109629
331	40346	45482	14629	14239	14239	8192	16613	7867	9395	30300	8745	10468															331	0.338794	0.379434	0.269609	0.335359	0.322997	0.270944	0.282789	0.270074	0.264395	0.351831	0.300546	0.332286		331	0.309922	0.0385758	0.0111359
341	40703	45905	14759	14369	14337	8257	16710	7900	9460	30625	8842	10598															341	0.341792	0.382963	0.272005	0.338421	0.32522	0.273094	0.28444	0.271207	0.266224	0.355604	0.30388	0.336412		341	0.312605	0.0392975	0.0113442
351	41126	46458	14890	14499	14499	8355	16873	7965	9525	30917	8908	10663															351	0.345344	0.387576	0.274419	0.341482	0.328895	0.276335	0.287215	0.273439	0.268053	0.358995	0.306148	0.338476		351	0.315532	0.0398739	0.0115106
361	41484	46913	15020	14597	14597	8322	16970	7965	9558	31178	8973	10728															361	0.34835	0.391372	0.276815	0.34379	0.331118	0.275244	0.288866	0.273439	0.268982	0.362026	0.308382	0.340539		361	0.31741	0.0409412	0.0118187
371	41874	47401	15117	14694	14694	8420	17100	8062	9655	31438	9038	10826															371	0.351625	0.395443	0.278603	0.346075	0.333318	0.278485	0.291079	0.276769	0.271712	0.365045	0.310616	0.34365		371	0.320202	0.0412303	0.0119022
381	42231	47856	15280	14857	14857	8452	17295	8062	9688	31698	9070	10891															381	0.354623	0.399239	0.281607	0.349914	0.337016	0.279544	0.294398	0.276769	0.27264	0.368064	0.311716	0.345713		381	0.322604	0.0421023	0.0121539
391	42621	48376	15345	14955	14955	8517	17393	8160	9753	31990	9168	10923															391	0.357898	0.403577	0.282805	0.352222	0.339239	0.281693	0.296066	0.280133	0.27447	0.371454	0.315084	0.346729		391	0.325114	0.0426275	0.0123055
401	42979	48799	15475	15085	15052	8550	17523	8192	9850	32250	9233	11053															401	0.360904	0.407106	0.285201	0.355284	0.341439	0.282785	0.298279	0.281232	0.277199	0.374473	0.317318	0.350855		401	0.327673	0.0432623	0.0124888
411	43304	49221	15572	15182	15117	8615	17653	8225	9883	32543	9265	11151															411	0.363633	0.410627	0.286989	0.357568	0.342914	0.284935	0.300492	0.282365	0.278128	0.377875	0.318418	0.353966		411	0.329826	0.0439734	0.012694
421	43662	49676	15735	15312	15280	8680	17751	8257	9948	32771	9363	11151															421	0.36664	0.414423	0.289993	0.36063	0.346611	0.287085	0.30216	0.283463	0.279957	0.380523	0.321786	0.353966		421	0.33227	0.0444192	0.0128227
431	44019	50099	15832	15410	15377	8680	17881	8355	10013	33063	9395	11281															431	0.369637	0.417951	0.29178	0.362938	0.348811	0.287085	0.304373	0.286828	0.281786	0.383913	0.322886	0.358093		431	0.334674	0.0451033	0.0130202
441	44377	50522	15962	15540	15475	8745	18043	8387	10078	33258	9460	11346															441	0.372644	0.42148	0.294176	0.366	0.351034	0.289234	0.307131	0.287926	0.283616	0.386178	0.325119	0.360156		441	0.337058	0.0455341	0.0131446
451	44670	50977	16092	15637	15572	8810	18108	8387	10110	33518	9558	11411															451	0.375104	0.425276	0.296572	0.368285	0.353235	0.291384	0.308237	0.287926	0.284516	0.389197	0.328487	0.362219		451	0.339203	0.0462866	0.0133618
461	45027	51367	16157	15702	15702	8875	18271	8485	10175	33746	9623	11476															461	0.378102	0.42853	0.29777	0.369816	0.356184	0.293534	0.311012	0.29129	0.286345	0.391844	0.330721	0.364283		461	0.341619	0.0465212	0.0134295
471	45352	51822	16320	15800	15767	8875	18401	8485	10273	33973	9655	11573															471	0.380831	0.432326	0.300774	0.372124	0.357658	0.293534	0.313225	0.29129	0.289103	0.39448	0.331821	0.367362		471	0.343711	0.0472239	0.0136324
481	45677	52180	16385	15897	15897	8973	18498	8550	10273	34266	9753	11671															481	0.38356	0.435312	0.301972	0.374408	0.360607	0.296775	0.314876	0.293522	0.289103	0.397882	0.335189	0.370473		481	0.34614	0.0478031	0.0137996
491	46035	52602	16515	16027	15995	9005	18596	8615	10371	34494	9785	11703															491	0.386566	0.438833	0.304368	0.37747	0.36283	0.297834	0.316544	0.295753	0.291861	0.400529	0.336289	0.371488		491	0.348364	0.048208	0.0139165
501	46328	53057	16613	16092	16125	9038	18758	8647	10436	34689	9850	11801															501	0.389027	0.442629	0.306174	0.379001	0.365779	0.298925	0.319301	0.296852	0.293691	0.402794	0.338523	0.374599		501	0.350608	0.0487852	0.0140831
511	46653	53383	16710	16222	16190	9103	18856	8712	10501	34916	9915	11834															511	0.391756	0.445348	0.307962	0.382063	0.367253	0.301075	0.32097	0.299083	0.29552	0.40543	0.340757	0.375647		511	0.352739	0.0490365	0.0141556
521	46945	53773	16840	16288	16255	9135	18986	8712	10533	35144	10013	11931															521	0.394208	0.448602	0.310358	0.383617	0.368728	0.302133	0.323182	0.299083	0.29642	0.408077	0.344125	0.378726		521	0.354772	0.0496919	0.0143448
531	47270	54163	16938	16385	16385	9200	19083	8810	10598	35371	10013	11964															531	0.396937	0.451855	0.312164	0.385902	0.371677	0.304283	0.324834	0.302448	0.29825	0.410713	0.344125	0.379773		531	0.356913	0.0499674	0.0144244
541	47563	54520	17068	16515	16515	9233	19214	8842	10696	35599	10110	12061															541	0.399397	0.454834	0.31456	0.388963	0.374626	0.305375	0.327064	0.303546	0.301007	0.41336	0.347459	0.382852		541	0.35942	0.0503821	0.014544
551	47856	54911	17165	16580	16548	9265	19311	8875	10696	35794	10175	12094															551	0.401857	0.458096	0.316347	0.390494	0.375374	0.306433	0.328715	0.304679	0.301007	0.415625	0.349692	0.3839		551	0.361018	0.0509852	0.0147182
561	48213	55268	17263	16678	16645	9330	19441	8940	10761	36022	10240	12191															561	0.404855	0.461074	0.318153	0.392802	0.377575	0.308583	0.330928	0.306911	0.302837	0.418272	0.351926	0.386979		561	0.363408	0.0513352	0.0148192
571	48441	55593	17328	16743	16775	9428	19539	8973	10793	36249	10273	12224															571	0.40677	0.463785	0.319351	0.394333	0.380524	0.311824	0.332596	0.308044	0.303737	0.420908	0.35306	0.388027		571	0.365247	0.0516642	0.0149142
581	48733	55951	17490	16873	16840	9428	19669	9005	10923	36477	10305	12321															581	0.409222	0.466772	0.322337	0.397395	0.381998	0.311824	0.334809	0.309142	0.307396	0.423555	0.35416	0.391106		581	0.367476	0.0520518	0.0150261
591	48994	56309	17555	16905	16938	9460	19766	9070	10956	36672	10371	12354															591	0.411414	0.469758	0.323535	0.398149	0.384221	0.312882	0.33646	0.311374	0.308324	0.425819	0.356428	0.392153		591	0.36921	0.0524248	0.0151337
601	49254	56699	17685	17035	17035	9493	19864	9103	11021	36867	10436	12419															601	0.413597	0.473012	0.325931	0.401211	0.386421	0.313974	0.338128	0.312506	0.310154	0.428084	0.358662	0.394216		601	0.371325	0.0529215	0.0152771
611	49579	56959	17751	17133	17100	9590	19994	9135	11053	37062	10501	12484															611	0.416326	0.475181	0.327147	0.403519	0.387896	0.317182	0.340341	0.313605	0.311054	0.430348	0.360896	0.39628		611	0.373315	0.0531697	0.0153488
1021	58292	66712	21262	19799	19961	11183	23733	10663	13004	43142	12386	14499															1021	0.489491	0.556546	0.391854	0.466309	0.452795	0.369869	0.403987	0.366061	0.365959	0.500946	0.42568	0.460242		1021	0.437478	0.0607703	0.0175429
1121	59885	68305	21912	20221	20481	11541	24415	10923	13427	44149	12711	14890															1121	0.502868	0.569835	0.403833	0.476248	0.46459	0.38171	0.415596	0.374987	0.377863	0.512639	0.436849	0.472653		1121	0.449139	0.0613983	0.0177242
1221	61185	69606	22530	20676	21002	11866	25098	11281	13752	45092	13036	15182															1221	0.513784	0.580689	0.415223	0.486964	0.476409	0.392459	0.427222	0.387277	0.38701	0.523589	0.448019	0.481922		1221	0.460047	0.0613335	0.0177055
1321	62453	70776	23050	21067	21457	12159	25683	11508	14109	45905	13329	15475															1321	0.524432	0.590449	0.424806	0.496173	0.48673	0.40215	0.43718	0.39507	0.397056	0.533029	0.458088	0.491223		1321	0.469699	0.0615395	0.0177649
1421	63526	71751	23570	21424	21782	12451	26236	11768	14402	46620	13589	15767															1421	0.533442	0.598583	0.43439	0.504581	0.494102	0.411808	0.446593	0.403996	0.405302	0.541331	0.467024	0.500492		1421	0.47847	0.0612342	0.0176768
1521	64469	72564	24025	21684	22172	12679	26756	12029	14694	47238	13817	15995															1521	0.541361	0.605366	0.442776	0.510704	0.502949	0.419348	0.455445	0.412956	0.413519	0.548507	0.47486	0.507729		1521	0.486293	0.0607126	0.0175262
1621	65314	73312	24448	21977	22465	12939	27179	12224	14955	47758	14044	16222															1621	0.548456	0.611606	0.450571	0.517605	0.509595	0.427948	0.462645	0.419651	0.420865	0.554545	0.482661	0.514935		1621	0.493424	0.0602528	0.0173935
1721	66062	73930	24903	22237	22725	13101	27601	12419	15182	48278	14207	16418															1721	0.554737	0.616762	0.458957	0.523729	0.515493	0.433306	0.469828	0.426345	0.427253	0.560583	0.488263	0.521157		1721	0.499701	0.0598843	0.0172871
1821	66712	74450	25163	22465	22985	13329	27959	12581	15410	48733	14369	16548															1821	0.560195	0.6211	0.463749	0.529099	0.521391	0.440847	0.475922	0.431906	0.433669	0.565867	0.493831	0.525283		1821	0.505238	0.0593211	0.0171245
1921	67362	74905	25488	22692	23180	13524	28317	12711	15605	49124	14532	16710															1921	0.565654	0.624896	0.469738	0.534445	0.525814	0.447296	0.482016	0.436369	0.439157	0.570407	0.499433	0.530426		1921	0.510471	0.0588506	0.0169887
2021	67947	75360	25846	22920	23407	13687	28642	12874	15767	49514	14694	16873															2021	0.570566	0.628692	0.476336	0.539815	0.530964	0.452687	0.487548	0.441965	0.443716	0.574935	0.505001	0.5356		2021	0.515652	0.0584204	0.0168645
2121	68435	75685	26106	23082	23602	13849	28934	13069	15962	49806	14792	17003															2121	0.574664	0.631403	0.481128	0.54363	0.535387	0.458045	0.492519	0.448659	0.449204	0.578326	0.508369	0.539726		2121	0.520088	0.0574665	0.0165891
2221	68890	76010	26333	23212	23798	14012	29162	13166	16092	50099	14922	17133															2221	0.578485	0.634114	0.485311	0.546692	0.539833	0.463436	0.4964	0.451989	0.452862	0.581728	0.512836	0.543853		2221	0.523962	0.0571149	0.0164877
2321	69410	76335	26594	23407	23928	14142	29422	13329	16255	50424	15085	17263															2321	0.582851	0.636826	0.490122	0.551285	0.542782	0.467736	0.500826	0.457585	0.457449	0.585502	0.518438	0.54798		2321	0.528282	0.0565276	0.0163181
2421	69703	76628	26756	23537	24058	14272	29682	13427	16418	50652	15182	17393															2421	0.585312	0.63927	0.493107	0.554347	0.545731	0.472036	0.505251	0.46095	0.462036	0.588149	0.521772	0.552106		2421	0.531672	0.0559741	0.0161583
2521	70191	76856	26984	23668	24220	14402	29910	13557	16515	50944	15312	17523															2521	0.589409	0.641172	0.497309	0.557432	0.549406	0.476335	0.509132	0.465412	0.464766	0.59154	0.52624	0.556233		2521	0.535366	0.0555737	0.0160427
2621	70548	77116	27179	23798	24383	14499	30105	13687	16613	51172	15410	17588															2621	0.592407	0.643341	0.500903	0.560494	0.553103	0.479544	0.512452	0.469875	0.467524	0.594187	0.529608	0.558296		2621	0.538478	0.0551703	0.0159263
2721	70841	77343	27374	23928	24513	14597	30300	13784	16775	51367	15475	17685															2721	0.594868	0.645235	0.504497	0.563555	0.556052	0.482785	0.515771	0.473205	0.472083	0.596452	0.531842	0.561375		2721	0.541477	0.0545866	0.0157578
2821	71166	77603	27569	23993	24610	14727	30495	13882	16840	51627	15605	17783															2821	0.597597	0.647404	0.508091	0.565086	0.558252	0.487085	0.51909	0.47657	0.473912	0.599471	0.53631	0.564486		2821	0.544446	0.0542508	0.0156608
2921	71459	77798	27699	24155	24740	14825	30722	14012	16970	51790	15637	17881															2921	0.600057	0.649031	0.510487	0.568902	0.561201	0.490326	0.522954	0.481033	0.477571	0.601363	0.537409	0.567597		2921	0.547328	0.0536592	0.0154901
3021	71751	77928	27894	24253	24903	14922	30852	14077	17100	52017	15767	17978															3021	0.602509	0.650115	0.51408	0.57121	0.564899	0.493534	0.525167	0.483264	0.481229	0.603999	0.541877	0.570676		3021	0.550213	0.0532057	0.0153592
3121	72011	78221	28056	24318	25033	15052	31080	14174	17165	52180	15800	18076															3121	0.604692	0.652559	0.517066	0.572741	0.567848	0.497834	0.529048	0.486594	0.483058	0.605892	0.543011	0.573787		3121	0.552844	0.0528577	0.0152587
3221	72271	78384	28187	24415	25131	15117	31210	14272	17263	52342	15865	18141															3221	0.606876	0.653919	0.51948	0.575025	0.570071	0.499983	0.531261	0.489958	0.485816	0.607773	0.545245	0.57585		3221	0.555105	0.0524731	0.0151477
3321	72499	78611	28317	24545	25228	15182	31405	14369	17360	52537	15962	18238															3321	0.60879	0.655813	0.521876	0.578087	0.572271	0.502133	0.53458	0.493288	0.488546	0.610037	0.548579	0.578929		3321	0.557744	0.0522006	0.015069
3421	72792	78774	28512	24610	25326	15280	31535	14434	17458	52765	16060	18336															3421	0.611251	0.657173	0.52547	0.579618	0.574494	0.505375	0.536793	0.49552	0.491304	0.612684	0.551947	0.58204		3421	0.560306	0.0518572	0.0149699
3521	73052	78969	28609	24740	25423	15377	31730	14499	17523	52895	16190	18433															3521	0.613434	0.6588	0.527258	0.58268	0.576694	0.508583	0.540113	0.497751	0.493133	0.614194	0.556415	0.585119		3521	0.562848	0.0516548	0.0149115
3621	73312	79196	28707	24805	25553	15442	31860	14597	17620	53057	16190	18498															3621	0.615617	0.660693	0.529064	0.584211	0.579643	0.510733	0.542326	0.501116	0.495863	0.616075	0.556415	0.587182		3621	0.564911	0.051424	0.0148448
3721	73572	79359	28837	24903	25651	15540	31990	14662	17718	53253	16255	18596															3721	0.6178	0.662053	0.53146	0.586519	0.581866	0.513974	0.544538	0.503347	0.498621	0.618351	0.558649	0.590293		3721	0.567289	0.051144	0.014764
3821	73832	79554	28967	25000	25748	15605	32153	14727	17783	53383	16288	18628															3821	0.619984	0.66368	0.533856	0.588803	0.584067	0.516124	0.547313	0.505579	0.50045	0.61986	0.559783	0.591309		3821	0.569234	0.0509673	0.014713
3921	74027	79782	29129	25098	25878	15670	32250	14825	17881	53545	16418	18758															3921	0.621621	0.665582	0.536841	0.591111	0.587016	0.518274	0.548964	0.508943	0.503208	0.621742	0.564251	0.595435		3921	0.571916	0.0506825	0.0146308
4021	74287	79944	29227	25163	26008	15735	32413	14922	17978	53708	16450	18823															4021	0.623804	0.666934	0.538647	0.592642	0.589965	0.520423	0.551739	0.512273	0.505938	0.623634	0.56535	0.597499		4021	0.574071	0.0503339	0.0145302
4121	74515	80172	29357	25196	26073	15832	32543	14987	18043	53870	16483	18888															4121	0.625719	0.668836	0.541043	0.59342	0.591439	0.523632	0.553952	0.514504	0.507767	0.625515	0.566485	0.599562		4121	0.575989	0.0501069	0.0144646
4221	74742	80367	29454	25326	26203	15865	32706	15052	18141	54000	16580	18986															4221	0.627625	0.670463	0.542831	0.596481	0.594388	0.524723	0.556726	0.516736	0.510525	0.627025	0.569818	0.602673		4221	0.578334	0.0500308	0.0144427
4321	74970	80529	29585	25423	26301	15962	32803	15150	18238	54195	16645	19051															4321	0.62954	0.671814	0.545245	0.598766	0.596611	0.527931	0.558377	0.5201	0.513255	0.629289	0.572052	0.604736		4321	0.580643	0.049581	0.0143128
4421	75132	80724	29715	25521	26431	16060	32998	15182	18238	54358	16710	19083															4421	0.6309	0.673441	0.547641	0.601074	0.59956	0.531172	0.561697	0.521199	0.513255	0.631182	0.574286	0.605752		4421	0.582597	0.0496001	0.0143183
4521	75393	80952	29845	25553	26496	16092	33031	15247	18368	54520	16743	19214															4521	0.633092	0.675343	0.550037	0.601828	0.601034	0.532231	0.562258	0.52343	0.516913	0.633063	0.57542	0.60991		4521	0.584547	0.0495301	0.0142981
4621	75620	81114	29975	25651	26626	16157	33161	15312	18433	54650	16840	19279															4621	0.634998	0.676694	0.552433	0.604136	0.603983	0.534381	0.564471	0.525662	0.518743	0.634572	0.578754	0.611973		4621	0.586733	0.0493389	0.0142429
4721	75848	81310	30072	25748	26691	16255	33356	15377	18498	54813	16905	19376															4721	0.636913	0.678329	0.55422	0.60642	0.605458	0.537622	0.567791	0.527893	0.520572	0.636465	0.580988	0.615053		4721	0.588977	0.0491391	0.0141852
4821	76075	81505	30170	25781	26821	16320	33518	15442	18628	54943	16970	19409															4821	0.638819	0.679956	0.556027	0.607198	0.608407	0.539772	0.570548	0.530125	0.52423	0.637974	0.583222	0.6161		4821	0.591031	0.0487032	0.0140594
4921	76238	81732	30267	25878	26886	16353	33616	15507	18693	55138	17003	19539															4921	0.640187	0.68185	0.557814	0.609482	0.609881	0.540863	0.572216	0.532356	0.52606	0.640239	0.584356	0.620227		4921	0.592961	0.0488709	0.0141078
5021	76465	81927	30430	25943	27016	16418	33713	15605	18726	55268	17068	19571															5021	0.642094	0.683477	0.560818	0.611013	0.61283	0.543013	0.573868	0.53572	0.526988	0.641748	0.58659	0.621242		5021	0.59495	0.0486381	0.0140406
5121	76660	82122	30495	26073	27081	16515	33876	15670	18791	55496	17165	19669															5121	0.643731	0.685104	0.562016	0.614075	0.614305	0.546221	0.576642	0.537952	0.528817	0.644396	0.589923	0.624353		5121	0.597295	0.0485545	0.0140165
5221	76888	82220	30690	26138	27179	16580	33941	15735	18888	55561	17198	19701															5221	0.645646	0.685921	0.56561	0.615606	0.616528	0.548371	0.577749	0.540183	0.531547	0.64515	0.591057	0.625369		5221	0.599061	0.0479975	0.0138557
5321	77083	82480	30755	26236	27309	16645	34104	15800	18986	55723	17263	19799															5321	0.647283	0.68809	0.566808	0.617914	0.619476	0.550521	0.580523	0.542415	0.534305	0.647032	0.593291	0.62848		5321	0.601345	0.0479614	0.0138453
5421	77311	82675	30820	26301	27406	16678	34201	15832	19018	55886	17328	19831															5421	0.649198	0.689717	0.568006	0.619445	0.621677	0.551612	0.582174	0.543513	0.535206	0.648924	0.595525	0.629496		5421	0.602874	0.0482171	0.0139191
5521	77473	82838	30950	26333	27504	16808	34364	15930	19116	56113	17360	19896															5521	0.650558	0.691077	0.570402	0.620198	0.6239	0.555912	0.584949	0.546878	0.537964	0.65156	0.596625	0.631559		5521	0.605132	0.0475747	0.0137336
5621	77636	83033	31080	26431	27536	16873	34461	15962	19148	56244	17458	20026															5621	0.651927	0.692704	0.572798	0.622506	0.624626	0.558062	0.5866	0.547976	0.538864	0.653081	0.599993	0.635685		5621	0.607069	0.0476895	0.0137668
5721	77896	83195	31178	26496	27666	16905	34591	16027	19246	56309	17523	20091															5721	0.65411	0.694055	0.574604	0.624037	0.627575	0.55912	0.588813	0.550208	0.541622	0.653836	0.602227	0.637749		5721	0.608996	0.0474801	0.0137063
5821	78058	83390	31275	26561	27764	16938	34689	16092	19344	56504	17588	20156															5821	0.65547	0.695682	0.576391	0.625568	0.629798	0.560212	0.590481	0.552439	0.54438	0.6561	0.604461	0.639812		5821	0.6109	0.0473736	0.0136756
5921	78253	83520	31373	26626	27861	17003	34819	16125	19376	56601	17620	20189															5921	0.657108	0.696766	0.578198	0.627099	0.631998	0.562362	0.592694	0.553572	0.545281	0.657226	0.605561	0.64086		5921	0.612394	0.0473003	0.0136544
6021	78481	83715	31503	26724	27926	17068	34916	16190	19441	56764	17685	20221															6021	0.659022	0.698393	0.580593	0.629407	0.633472	0.564511	0.594345	0.555803	0.54711	0.659119	0.607795	0.641875		6021	0.614287	0.0471252	0.0136039
6121	78611	83878	31600	26821	28056	17133	35046	16288	19539	56926	17718	20319															6121	0.660114	0.699753	0.582381	0.631692	0.636421	0.566661	0.596558	0.559168	0.549868	0.661	0.608929	0.644986		6121	0.616461	0.0467901	0.0135071
6221	78806	84073	31698	26854	28089	17165	35111	16320	19571	57024	17751	20384															6221	0.661751	0.70138	0.584187	0.632469	0.63717	0.56772	0.597665	0.560266	0.550768	0.662138	0.610063	0.647049		6221	0.617719	0.0469386	0.01355
6321	79034	84236	31795	26919	28252	17295	35306	16385	19636	57186	17816	20481															6321	0.663666	0.70274	0.585975	0.634	0.640867	0.572019	0.600984	0.562498	0.552598	0.664019	0.612297	0.650129		6321	0.620149	0.0466706	0.0134726
6421	79261	84398	31925	26951	28284	17328	35371	16450	19734	57284	17881	20514															6421	0.665572	0.704091	0.588371	0.634754	0.641593	0.573111	0.60209	0.564729	0.555355	0.665157	0.614531	0.651176		6421	0.621711	0.0463107	0.0133688
6521	79391	84561	31990	27016	28317	17328	35469	16515	19766	57446	17978	20546															6521	0.666664	0.705451	0.589569	0.636284	0.642342	0.573111	0.603758	0.566961	0.556256	0.667038	0.617864	0.652192		6521	0.623124	0.0463632	0.0133839
6621	79554	84788	32088	27114	28447	17458	35567	16580	19864	57609	18011	20611															6621	0.668033	0.707345	0.591375	0.638593	0.645291	0.57741	0.605427	0.569192	0.559014	0.668931	0.618999	0.654255		6621	0.625322	0.0460205	0.013285
6721	79716	84853	32218	27211	28512	17490	35697	16580	19896	57707	18011	20676															6721	0.669393	0.707887	0.593771	0.640877	0.646765	0.578469	0.60764	0.569192	0.559914	0.670069	0.618999	0.656318		6721	0.626608	0.046099	0.0133076
6821	79879	85016	32315	27244	28642	17523	35794	16645	19961	57837	18108	20742															6821	0.670762	0.709247	0.595558	0.641654	0.649714	0.57956	0.609291	0.571424	0.561744	0.671578	0.622332	0.658413		6821	0.62844	0.0460051	0.0132805
6921	80042	85211	32380	27309	28707	17588	35892	16710	20026	57967	18173	20807															6921	0.67213	0.710874	0.596756	0.643185	0.651189	0.58171	0.610959	0.573655	0.563573	0.673088	0.624566	0.660477		6921	0.63018	0.0458652	0.0132401
7021	80237	85341	32478	27374	28837	17653	36022	16775	20091	58097	18173	20839															7021	0.673768	0.711958	0.598562	0.644716	0.654138	0.58386	0.613172	0.575887	0.565402	0.674597	0.624566	0.661493		7021	0.631843	0.0456299	0.0131722
7121	80399	85471	32576	27439	28902	17685	36119	16840	20189	58259	18238	20872															7121	0.675128	0.713043	0.600369	0.646247	0.655612	0.584918	0.614823	0.578118	0.56816	0.676478	0.6268	0.66254		7121	0.63352	0.045317	0.0130819
7221	80497	85633	32641	27471	28934	17751	36217	16873	20189	58357	18303	20969															7221	0.675951	0.714394	0.601567	0.647001	0.656338	0.587101	0.616491	0.579251	0.56816	0.677616	0.629034	0.665619		7221	0.634877	0.0454263	0.0131135
7321	80724	85796	32771	27569	29032	17816	36314	16905	20254	58487	18368	20969															7321	0.677857	0.715754	0.603962	0.649309	0.658561	0.589251	0.618142	0.580349	0.569989	0.679126	0.631268	0.665619		7321	0.636599	0.0452661	0.0130672
7421	80854	85861	32803	27634	29097	17881	36412	16970	20319	58584	18401	21067															7421	0.678949	0.716296	0.604552	0.65084	0.660035	0.591401	0.61981	0.582581	0.571819	0.680252	0.632402	0.66873		7421	0.638139	0.0450158	0.0129949
7521	80984	86056	32933	27699	29162	17946	36509	17035	20351	58714	18433	21132															7521	0.680041	0.717923	0.606948	0.652371	0.66151	0.593551	0.621462	0.584812	0.572719	0.681762	0.633502	0.670793		7521	0.639783	0.044915	0.0129658
7621	81179	86154	33031	27764	29227	17978	36607	17100	20449	58844	18498	21132															7621	0.681678	0.718741	0.608754	0.653901	0.662984	0.594609	0.62313	0.587044	0.575477	0.683271	0.635736	0.670793		7621	0.641343	0.0444815	0.0128407
7721	81277	86381	33063	27829	29292	18043	36672	17133	20481	58942	18596	21197															7721	0.682501	0.720634	0.609344	0.655432	0.664459	0.596759	0.624236	0.588177	0.576378	0.684409	0.639104	0.672857		7721	0.642857	0.0446102	0.0128778
7821	81472	86511	33193	27894	29357	18108	36769	17165	20546	59039	18628	21262															7821	0.684138	0.721719	0.61174	0.656963	0.665933	0.598909	0.625887	0.589275	0.578207	0.685535	0.640203	0.67492		7821	0.644453	0.044435	0.0128273
7921	81602	86576	33258	27959	29454	18141	36899	17230	20611	59170	18661	21262															7921	0.68523	0.722261	0.612938	0.658494	0.668134	0.6	0.6281	0.591507	0.580036	0.687057	0.641338	0.67492		7921	0.645834	0.0441016	0.012731
8021	81765	86739	33323	27959	29552	18206	36932	17263	20644	59300	18693	21359															8021	0.686599	0.723621	0.614136	0.658494	0.670357	0.60215	0.628662	0.59264	0.580965	0.688566	0.642437	0.677999		8021	0.647219	0.0442811	0.0127829
8121	81895	86836	33421	28024	29552	18206	37030	17295	20742	59365	18726	21359															8121	0.687691	0.72443	0.615942	0.660025	0.670357	0.60215	0.63033	0.593738	0.583723	0.689321	0.643572	0.677999		8121	0.648273	0.0439064	0.0126747
8221	81992	86966	33486	28089	29650	18303	37160	17328	20774	59527	18791	21424															8221	0.688505	0.725515	0.61714	0.661556	0.67258	0.605358	0.632543	0.594871	0.584623	0.691202	0.645805	0.680062		8221	0.64998	0.0438367	0.0126546
8321	82187	87096	33583	28154	29682	18336	37225	17393	20839	59592	18856	21457															8321	0.690143	0.726599	0.618927	0.663087	0.673306	0.606449	0.633649	0.597103	0.586452	0.691957	0.648039	0.68111		8321	0.651402	0.0435552	0.0125733
8421	82317	87259	33681	28187	29747	18368	37290	17425	20904	59690	18856	21522															8421	0.691234	0.727959	0.620734	0.663864	0.67478	0.607508	0.634756	0.598201	0.588282	0.693095	0.648039	0.683173		8421	0.652635	0.0435358	0.0125677
8521	82447	87324	33746	28252	29812	18401	37420	17490	20904	59852	18921	21554															8521	0.692326	0.728501	0.621931	0.665395	0.676254	0.608599	0.636969	0.600433	0.588282	0.694976	0.650273	0.684189		8521	0.654011	0.0435021	0.012558
8621	82545	87519	33811	28317	29910	18466	37485	17523	20969	59917	18986	21587															8621	0.693149	0.730128	0.623129	0.666926	0.678477	0.610749	0.638075	0.601565	0.590111	0.69573	0.652507	0.685236		8621	0.655482	0.0433755	0.0125214
8721	82675	87552	33876	28349	29877	18498	37517	17555	21034	60047	19018	21684															8721	0.69424	0.730403	0.624327	0.667679	0.677729	0.611808	0.63862	0.602664	0.59194	0.69724	0.653607	0.688315		8721	0.656548	0.0432335	0.0124804
8821	82838	87714	33941	28414	30072	18563	37647	17620	21099	60177	19051	21684															8821	0.695609	0.731755	0.625525	0.66921	0.682152	0.613957	0.640833	0.604895	0.593769	0.698749	0.654741	0.688315		8821	0.658293	0.0430508	0.0124277
8921	82935	87812	34039	28414	30072	18596	37777	17653	21132	60210	19051	21717															8921	0.696424	0.732572	0.627331	0.66921	0.682152	0.615049	0.643046	0.606028	0.594698	0.699133	0.654741	0.689363		8921	0.659146	0.0427828	0.0123503
9021	83000	87942	34104	28544	30105	18596	37810	17718	21229	60307	19083	21749															9021	0.696969	0.733657	0.628529	0.672272	0.682901	0.615049	0.643607	0.60826	0.597428	0.700259	0.655841	0.690379		9021	0.660429	0.0425312	0.0122777
9121	83195	88039	34201	28544	30202	18693	37907	17751	21262	60437	19148	21782															9121	0.698607	0.734466	0.630317	0.672272	0.685101	0.618257	0.645258	0.609393	0.598357	0.701768	0.658075	0.691426		9121	0.661941	0.0423288	0.0122193
9221	83325	88137	34234	28609	30235	18726	37940	17783	21294	60567	19181	21847															9221	0.699699	0.735284	0.630925	0.673803	0.68585	0.619348	0.64582	0.610491	0.599257	0.703278	0.659209	0.69349		9221	0.663038	0.0424548	0.0122557
9321	83390	88299	34266	28642	30267	18791	38005	17848	21327	60600	19246	21912															9321	0.700244	0.736635	0.631515	0.67458	0.686576	0.621498	0.646927	0.612723	0.600186	0.703661	0.661443	0.695553		9321	0.664295	0.0422547	0.0121979
9421	83488	88364	34396	28707	30365	18823	38102	17881	21327	60698	19246	21944															9421	0.701067	0.737178	0.633911	0.676111	0.688799	0.622557	0.648578	0.613856	0.600186	0.704799	0.661443	0.696569		9421	0.665421	0.0422607	0.0121996
9521	83650	88397	34429	28739	30430	18856	38200	17913	21392	60828	19311	21944															9521	0.702428	0.737453	0.634519	0.676865	0.690273	0.623648	0.650246	0.614954	0.602015	0.706309	0.663677	0.696569		9521	0.66658	0.0420314	0.0121334
9621	83748	88559	34526	28804	30462	18921	38297	17946	21489	60893	19376	21977															9621	0.703251	0.738804	0.636307	0.678396	0.690999	0.625798	0.651897	0.616087	0.604745	0.707063	0.665911	0.697616		9621	0.668073	0.0416055	0.0120105
9721	83845	88657	34559	28837	30495	18953	38330	17946	21457	60990	19376	22042															9721	0.704065	0.739622	0.636915	0.679173	0.691748	0.626856	0.652459	0.616087	0.603844	0.70819	0.665911	0.699679		9721	0.668712	0.0420473	0.012138
9821	83943	88722	34656	28837	30527	18986	38395	18011	21522	61023	19409	22107															9821	0.704888	0.740164	0.638703	0.679173	0.692473	0.627948	0.653565	0.618319	0.605673	0.708573	0.667045	0.701743		9821	0.669856	0.0416263	0.0120165
9921	84073	88885	34721	28869	30592	19051	38525	18076	21587	61185	19441	22107															9921	0.70598	0.741524	0.6399	0.679927	0.693948	0.630098	0.655778	0.62055	0.607503	0.710454	0.668144	0.701743		9921	0.671296	0.0412986	0.0119219
10021	84203	88917	34754	28934	30657	19083	38558	18076	21652	61283	19474	22172															10021	0.707071	0.741791	0.640509	0.681457	0.695422	0.631156	0.65634	0.62055	0.609332	0.711592	0.669279	0.703806		10021	0.672359	0.0413449	0.0119352
10121	84268	89080	34819	28967	30722	19083	38623	18108	21684	61315	19506	22205															10121	0.707617	0.743151	0.641707	0.682235	0.696897	0.631156	0.657446	0.621649	0.610232	0.711963	0.670378	0.704854		10121	0.673274	0.0414108	0.0119543
10221	84463	89112	34851	29032	30755	19148	38655	18173	21749	61445	19571	22205															10221	0.709255	0.743418	0.642296	0.683766	0.697645	0.633306	0.657991	0.62388	0.612062	0.713473	0.672612	0.704854		10221	0.674546	0.0409993	0.0118355
10321	84496	89242	34916	29064	30787	19181	38753	18206	21749	61543	19539	22270															10321	0.709532	0.744502	0.643494	0.684519	0.698371	0.634397	0.659659	0.625013	0.612062	0.714611	0.671513	0.706917		10321	0.675382	0.0411145	0.0118687
10421	84593	89307	34981	29064	30885	19214	38850	18206	21782	61608	19604	22270															10421	0.710346	0.745045	0.644692	0.684519	0.700594	0.635489	0.66131	0.625013	0.61299	0.715366	0.673746	0.706917		10421	0.676336	0.0410549	0.0118515
10521	84756	89437	35079	29162	30917	19279	38883	18238	21879	61705	19669	22302															10521	0.711715	0.746129	0.646498	0.686827	0.70132	0.637638	0.661872	0.626111	0.61572	0.716492	0.67598	0.707933		10521	0.677853	0.0407142	0.0117532
10621	84756	89502	35144	29227	30982	19279	38948	18303	21879	61803	19701	22335															10621	0.711715	0.746671	0.647696	0.688358	0.702795	0.637638	0.662979	0.628343	0.61572	0.71763	0.67708	0.70898		10621	0.6788	0.0406935	0.0117472
10721	84918	89535	35176	29227	31015	19311	39013	18336	21879	61900	19701	22367															10721	0.713075	0.746947	0.648286	0.688358	0.703543	0.638697	0.664085	0.629476	0.61572	0.718756	0.67708	0.709996		10721	0.679502	0.0407397	0.0117605
10821	84951	89730	35241	29259	31048	19344	39078	18368	21944	61933	19734	22400															10821	0.713352	0.748573	0.649484	0.689112	0.704292	0.639788	0.665191	0.630574	0.617549	0.719139	0.678214	0.711043		10821	0.680526	0.0405572	0.0117079
10921	85113	89795	35274	29292	31080	19409	39143	18401	21977	62030	19799	22432															10921	0.714713	0.749116	0.650092	0.689889	0.705018	0.641938	0.666298	0.631707	0.618478	0.720266	0.680448	0.712059		10921	0.681668	0.0404178	0.0116676
11021	85178	89860	35274	29357	31113	19441	39175	18433	22042	62096	19831	22432															11021	0.715259	0.749658	0.650092	0.69142	0.705766	0.642997	0.666843	0.632806	0.620307	0.721032	0.681548	0.712059		11021	0.682482	0.040178	0.0115984
11121	85276	89925	35404	29389	31210	19506	39240	18466	22042	62161	19864	22497															11121	0.716082	0.7502	0.652488	0.692174	0.707967	0.645146	0.667949	0.633939	0.620307	0.721787	0.682682	0.714122		11121	0.683737	0.0401272	0.0115837
11221	85373	89990	35436	29422	31210	19539	39273	18466	22107	62291	19896	22530															11221	0.716896	0.750742	0.653078	0.692951	0.707967	0.646238	0.668511	0.633939	0.622137	0.723296	0.683782	0.71517		11221	0.684559	0.0400665	0.0115662
11321	85503	90055	35502	29422	31275	19539	39370	18531	22172	62356	19929	22562															11321	0.717988	0.751285	0.654294	0.692951	0.709441	0.646238	0.670162	0.63617	0.623966	0.724051	0.684916	0.716186		11321	0.685637	0.0397837	0.0114846
11421	85503	90185	35534	29487	31308	19571	39468	18531	22172	62421	19896	22562															11421	0.717988	0.752369	0.654884	0.694482	0.71019	0.647296	0.67183	0.63617	0.623966	0.724806	0.683782	0.716186		11421	0.686162	0.039892	0.0115158
11521	85568	90283	35599	29552	31373	19604	39500	18563	22237	62486	19929	22595															11521	0.718534	0.753187	0.656082	0.696013	0.711664	0.648388	0.672375	0.637269	0.625795	0.725561	0.684916	0.717233		11521	0.687251	0.0397139	0.0114644
11621	85731	90348	35664	29552	31405	19636	39598	18596	22237	62583	19961	22627															11621	0.719902	0.753729	0.65728	0.696013	0.71239	0.649446	0.674043	0.638402	0.625795	0.726687	0.686016	0.718249		11621	0.688163	0.0397342	0.0114703
11721	85829	90478	35729	29617	31470	19701	39663	18628	22270	62681	19994	22660															11721	0.720725	0.754814	0.658478	0.697544	0.713864	0.651596	0.675149	0.6395	0.626724	0.727825	0.68715	0.719297		11721	0.689389	0.0396658	0.0114505
11821	85894	90510	35762	29617	31470	19734	39663	18661	22302	62746	20059	22725															11821	0.721271	0.755081	0.659086	0.697544	0.713864	0.652687	0.675149	0.640633	0.627624	0.72858	0.689384	0.72136		11821	0.690189	0.0395519	0.0114176
11921	85959	90640	35827	29682	31568	19766	39760	18661	22367	62811	20124	22757															11921	0.721817	0.756165	0.660284	0.699074	0.716087	0.653746	0.676801	0.640633	0.629453	0.729334	0.691618	0.722376		11921	0.691449	0.0395434	0.0114152
12021	86056	90738	35859	29747	31600	19766	39793	18693	22400	62876	20091	22757															12021	0.722631	0.756983	0.660874	0.700605	0.716813	0.653746	0.677362	0.641732	0.630382	0.730089	0.690484	0.722376		12021	0.692006	0.0395391	0.0114139
12121	86121	90803	35892	29747	31633	19799	39858	18758	22432	62973	20124	22790															12121	0.723177	0.757525	0.661482	0.700605	0.717562	0.654837	0.678469	0.643963	0.631283	0.731215	0.691618	0.723423		12121	0.69293	0.0393096	0.0113477
12221	86219	90803	35989	29780	31633	19864	39891	18823	22465	63071	20156	22822															12221	0.724	0.757525	0.663269	0.701383	0.717562	0.656987	0.67903	0.646195	0.632211	0.732353	0.692717	0.724439		12221	0.693973	0.0388305	0.0112094
12321	86316	90933	35989	29780	31698	19864	39956	18791	22465	63103	20189	22855															12321	0.724815	0.758609	0.663269	0.701383	0.719036	0.656987	0.680137	0.645096	0.632211	0.732725	0.693852	0.725486		12321	0.694467	0.0393234	0.0113517
12421	86381	90965	36054	29845	31698	19896	40021	18823	22562	63136	20189	22855															12421	0.72536	0.758876	0.664467	0.702913	0.719036	0.658045	0.681243	0.646195	0.634941	0.733108	0.693852	0.725486		12421	0.695294	0.0387303	0.0111805
12521	86479	91095	36087	29845	31795	19961	40053	18856	22562	63298	20221	22920															12521	0.726183	0.759961	0.665076	0.702913	0.721237	0.660195	0.681788	0.647327	0.634941	0.734989	0.694951	0.72755		12521	0.696426	0.039009	0.0112609
12621	86511	91128	36152	29877	31828	19961	40118	18921	22562	63331	20286	22952															12621	0.726452	0.760236	0.666273	0.703667	0.721985	0.660195	0.682894	0.649559	0.634941	0.735372	0.697185	0.728566		12621	0.697277	0.03885	0.011215
12721	86674	91193	36217	29942	31860	19994	40183	18953	22627	63461	20286	22920															12721	0.727821	0.760779	0.667471	0.705198	0.722711	0.661287	0.684001	0.650657	0.63677	0.736882	0.697185	0.72755		12721	0.698193	0.0385467	0.0111275
12821	86739	91355	36282	29975	31893	20059	40248	18953	22660	63461	20319	22952															12821	0.728367	0.76213	0.668669	0.705975	0.72346	0.663436	0.685107	0.650657	0.637699	0.736882	0.698319	0.728566		12821	0.699106	0.0384669	0.0111044
12921	86771	91388	36282	29975	31925	20059	40281	18953	22692	63591	20319	22985															12921	0.728635	0.762405	0.668669	0.705975	0.724186	0.663436	0.685669	0.650657	0.6386	0.738391	0.698319	0.729613		12921	0.699546	0.0386297	0.0111514
13021	86836	91388	36314	30007	31925	20091	40346	19018	22692	63624	20351	23017															13021	0.729181	0.762405	0.669259	0.706729	0.724186	0.664495	0.686775	0.652889	0.6386	0.738775	0.699419	0.730629		13021	0.700278	0.0383609	0.0110738
13121	86934	91518	36412	30040	31990	20124	40378	19051	22757	63689	20384	23050															13121	0.730004	0.76349	0.671065	0.707506	0.72566	0.665586	0.68732	0.654022	0.640429	0.739529	0.700553	0.731676		13121	0.701403	0.0381786	0.0110212
13221	86999	91616	36412	30105	32055	20156	40411	19051	22790	63754	20416	23050															13221	0.73055	0.764307	0.671065	0.709037	0.727135	0.666645	0.687882	0.654022	0.641358	0.740284	0.701653	0.731676		13221	0.702134	0.03827	0.0110476
13321	87064	91648	36444	30137	32055	20189	40508	19083	22822	63786	20481	23082															13321	0.731096	0.764574	0.671655	0.709791	0.727135	0.667736	0.689533	0.65512	0.642258	0.740656	0.703887	0.732692		13321	0.703011	0.0380181	0.0109749
13421	87161	91681	36509	30202	32153	20189	40508	19083	22855	63884	20481	23147															13421	0.73191	0.76485	0.672853	0.711322	0.729358	0.667736	0.689533	0.65512	0.643187	0.741794	0.703887	0.734755		13421	0.703859	0.0382982	0.0110557
13521	87259	91778	36542	30202	32120	20221	40573	19116	22855	63981	20481	23115															13521	0.732733	0.765659	0.673461	0.711322	0.728609	0.668794	0.69064	0.656253	0.643187	0.74292	0.703887	0.73374		13521	0.704267	0.0381546	0.0110143
13621	87324	91843	36607	30235	32185	20254	40606	19148	22887	64014	20481	23180															13621	0.733279	0.766201	0.674659	0.712099	0.730083	0.669886	0.691201	0.657352	0.644087	0.743303	0.703887	0.735803		13621	0.705153	0.0380985	0.0109981
13721	87389	91908	36672	30267	32218	20286	40671	19181	22952	64111	20546	23180															13721	0.733825	0.766743	0.675857	0.712852	0.730832	0.670944	0.692308	0.658485	0.645917	0.744429	0.706121	0.735803		13721	0.706176	0.0377612	0.0109007
13821	87487	91908	36672	30267	32283	20319	40671	19214	22952	64176	20611	23180															13821	0.734648	0.766743	0.675857	0.712852	0.732307	0.672036	0.692308	0.659618	0.645917	0.745184	0.708355	0.735803		13821	0.706802	0.0377575	0.0108996
13921	87552	92071	36704	30300	32315	20319	40768	19214	23017	64209	20611	23245															13921	0.735194	0.768103	0.676447	0.71363	0.733032	0.672036	0.693959	0.659618	0.647746	0.745567	0.708355	0.737866		13921	0.707629	0.0378629	0.0109301
15321	88462	92948	37290	30690	32706	20709	41353	19539	23407	65087	20904	23602															15321	0.742835	0.77542	0.687247	0.722815	0.741902	0.684935	0.703917	0.670775	0.658721	0.755762	0.718425	0.749198		15321	0.717663	0.0367894	0.0106202
16321	89145	93534	37615	30950	33031	20969	41809	19701	23700	65704	21132	23733															16321	0.74857	0.780308	0.693236	0.728939	0.749274	0.693534	0.711679	0.676336	0.666967	0.762927	0.72626	0.753357		16321	0.724282	0.0361434	0.0104337
17321	89665	94086	37907	31178	33388	21164	42166	19961	23928	66289	21392	23960															17321	0.752937	0.784913	0.698618	0.734308	0.757372	0.699983	0.717756	0.685262	0.673383	0.769719	0.735196	0.760562		17321	0.730834	0.0357802	0.0103288
18321	90250	94704	38232	31373	33648	21392	42524	20059	24123	66842	21522	24090															18321	0.757849	0.790069	0.704607	0.738901	0.76327	0.707524	0.72385	0.688626	0.678871	0.776141	0.739664	0.764689		18321	0.736172	0.0357419	0.0103178
19321	90705	95159	38460	31568	33908	21554	42849	20189	24350	67297	21717	24285															19321	0.76167	0.793865	0.708809	0.743494	0.769168	0.712882	0.729382	0.693089	0.685259	0.781424	0.746366	0.770879		19321	0.741357	0.0355987	0.0102765
20321	91290	95712	38753	31795	34201	21782	43174	20351	24545	67785	21879	24480															20321	0.766582	0.798478	0.714209	0.74884	0.775814	0.720423	0.734914	0.698651	0.690747	0.78709	0.751933	0.777069		20321	0.747063	0.0354612	0.0102368
21321	91746	96135	39045	31990	34396	21944	43532	20481	24740	68273	22042	24610															21321	0.770412	0.802007	0.719591	0.753433	0.780238	0.725781	0.741008	0.703114	0.696235	0.792757	0.757535	0.781195		21321	0.751942	0.0350862	0.0101285
22321	92266	96687	39305	32120	34624	22139	43792	20644	24968	68663	22172	24773															22321	0.774778	0.806612	0.724383	0.756495	0.78541	0.732231	0.745434	0.70871	0.702651	0.797285	0.762003	0.78637		22321	0.756863	0.0346306	0.00999699
23321	92721	97175	39500	32315	34851	22302	44117	20742	25131	69118	22335	24903															23321	0.778599	0.810683	0.727976	0.761087	0.790559	0.737622	0.750966	0.712074	0.707238	0.802568	0.767605	0.790496		23321	0.761456	0.0347888	0.0100427
24321	93209	97728	39793	32445	35046	22432	44410	20839	25293	69443	22432	25098															24321	0.782697	0.815297	0.733376	0.764149	0.794982	0.741922	0.755953	0.715404	0.711797	0.806342	0.770939	0.796686		24321	0.765795	0.0348872	0.0100711
25321	93696	98248	40021	32608	35274	22595	44702	21002	25521	69866	22627	25293															25321	0.786786	0.819635	0.737578	0.767988	0.800154	0.747313	0.760924	0.721	0.718214	0.811254	0.77764	0.802876		25321	0.770947	0.0346675	0.0100076
26321	94151	98800	40281	32738	35436	22757	44995	21067	25716	70191	22757	25423															26321	0.790607	0.82424	0.74237	0.77105	0.803829	0.752671	0.765911	0.723231	0.723701	0.815028	0.782108	0.807003		26321	0.775146	0.034574	0.00998066
27321	94541	99288	40508	32901	35632	22887	45190	21197	25846	70646	22855	25553															27321	0.793882	0.828311	0.746554	0.774889	0.808275	0.75697	0.769231	0.727694	0.72736	0.820311	0.785476	0.811129		27321	0.779173	0.0346934	0.0100151
28321	95029	99808	40768	33031	35827	23050	45482	21327	26073	70971	23017	25716															28321	0.79798	0.832649	0.751345	0.77795	0.812698	0.762362	0.774201	0.732157	0.733748	0.824085	0.791044	0.816303		28321	0.783877	0.0343321	0.00991082
29321	95452	100328	40996	33193	35989	23180	45775	21457	26236	71231	23115	25813															29321	0.801532	0.836987	0.755547	0.781766	0.816373	0.766661	0.779189	0.73662	0.738335	0.827104	0.794412	0.819382		29321	0.787826	0.033944	0.00979879
30321	95939	100849	41191	33323	36119	23277	46003	21554	26431	71589	23277	26008															30321	0.805621	0.841334	0.759141	0.784828	0.819322	0.769869	0.78307	0.73995	0.743823	0.831261	0.799979	0.825572		30321	0.791981	0.0341506	0.00985844
31321	96330	101401	41419	33453	36282	23440	46230	21619	26561	71849	23375	26138															31321	0.808904	0.845939	0.763343	0.787889	0.82302	0.77526	0.786934	0.742181	0.747481	0.83428	0.803347	0.829699		31321	0.79569	0.0342973	0.00990077
32321	96720	101791	41614	33551	36477	23537	46458	21782	26756	72174	23472	26236															32321	0.812179	0.849192	0.766937	0.790198	0.827443	0.778469	0.790815	0.747777	0.752969	0.838053	0.806681	0.83281		32321	0.79946	0.0337954	0.00975588
33321	97110	102279	41874	33713	36607	23733	46685	21814	26919	72467	23635	26366															33321	0.815454	0.853264	0.771729	0.794013	0.830392	0.784951	0.794679	0.748876	0.757556	0.841456	0.812283	0.836936		33321	0.803466	0.0338367	0.00976782
34321	97500	102702	42069	33811	36769	23798	46880	21912	27016	72824	23733	26463															34321	0.818729	0.856792	0.775323	0.796321	0.834067	0.787101	0.797998	0.75224	0.760286	0.845601	0.815651	0.840015		34321	0.806677	0.0340834	0.00983903
35321	97923	103157	42264	33941	36932	23895	47108	22042	27211	73052	23798	26561															35321	0.822281	0.860588	0.778916	0.799383	0.837764	0.790309	0.801879	0.756703	0.765774	0.848248	0.817885	0.843126		35321	0.810238	0.0336179	0.00970464
36321	98215	103515	42491	34071	37030	24025	47303	22107	27374	73279	23960	26594															36321	0.824733	0.863575	0.7831	0.802445	0.839987	0.794609	0.805199	0.758934	0.770361	0.850884	0.823453	0.844174		36321	0.813454	0.0331434	0.00956767
37321	98508	103872	42654	34169	37192	24090	47466	22172	27471	73572	24025	26724															37321	0.827194	0.866553	0.786104	0.804753	0.843662	0.796759	0.807973	0.761166	0.773091	0.854286	0.825686	0.8483		37321	0.816294	0.0335085	0.00967306
38321	98963	104262	42784	34266	37355	24253	47693	22270	27634	73799	24123	26789															38321	0.831014	0.869807	0.7885	0.807037	0.84736	0.80215	0.811837	0.76453	0.777678	0.856922	0.829055	0.850363		38321	0.819688	0.0332076	0.00958622
39321	99321	104620	42979	34364	37420	24350	47888	22335	27829	74027	24253	26886															39321	0.834021	0.872793	0.792094	0.809345	0.848834	0.805358	0.815157	0.766762	0.783165	0.85957	0.833522	0.853443		39321	0.822839	0.0329002	0.00949748
40321	99581	104880	43207	34396	37517	24448	48051	22465	27926	74255	24350	26951															40321	0.836204	0.874962	0.796296	0.810099	0.851034	0.808599	0.817931	0.771225	0.785895	0.862217	0.836856	0.855506		40321	0.825569	0.0323867	0.00934923
41321	99906	105173	43337	34559	37712	24513	48148	22497	28056	74515	24415	27049															41321	0.838933	0.877407	0.798691	0.813938	0.855458	0.810749	0.819582	0.772323	0.789554	0.865236	0.83909	0.858617		41321	0.828298	0.0327019	0.00944021
42321	100166	105465	43467	34656	37810	24578	48343	22595	28154	74710	24480	27146															42321	0.841116	0.879843	0.801087	0.816223	0.857681	0.812899	0.822902	0.775687	0.792312	0.8675	0.841324	0.861696		42321	0.830856	0.0325343	0.00939185
43321	100426	105725	43629	34754	37875	24708	48506	22660	28252	74937	24545	27146															43321	0.843299	0.882012	0.804073	0.818531	0.859155	0.817199	0.825676	0.777919	0.79507	0.870136	0.843558	0.861696		43321	0.833194	0.0320908	0.00926381
44321	100784	105953	43792	34786	38005	24773	48636	22757	28382	75132	24643	27244															44321	0.846306	0.883914	0.807077	0.819284	0.862104	0.819348	0.827889	0.781249	0.798728	0.8724	0.846926	0.864807		44321	0.835836	0.0319134	0.00921261
45321	100979	106213	43889	34884	38135	24838	48766	22790	28479	75295	24708	27309															45321	0.847943	0.886083	0.808865	0.821593	0.865053	0.821498	0.830102	0.782382	0.801458	0.874293	0.84916	0.86687		45321	0.837942	0.0320502	0.00925208
46321	101271	106408	44019	34916	38135	24903	48929	22855	28577	75490	24773	27309															46321	0.850395	0.88771	0.811261	0.822346	0.865053	0.823648	0.832877	0.784613	0.804216	0.876557	0.851394	0.86687		46321	0.839745	0.0316276	0.0091301
47321	101466	106603	44182	35014	38232	25000	48994	22887	28674	75685	24805	27406															47321	0.852033	0.889337	0.814265	0.824654	0.867253	0.826856	0.833983	0.785712	0.806945	0.878822	0.852493	0.869949		47321	0.841859	0.0316039	0.00912327
48321	101694	106766	44279	35079	38330	25131	49124	22985	28804	75880	24903	27439															48321	0.853947	0.890696	0.816052	0.826185	0.869476	0.831189	0.836196	0.789076	0.810604	0.881086	0.855861	0.870996		48321	0.844281	0.0310833	0.00897296
49321	101954	106993	44377	35209	38362	25098	49286	23017	28837	76043	24968	27504															49321	0.85613	0.89259	0.817858	0.829247	0.870202	0.830098	0.838953	0.790175	0.811533	0.882979	0.858095	0.87306		49321	0.84591	0.0313115	0.00903884
50321	102117	107188	44507	35306	38460	25228	49351	23082	28902	76238	25000	27569															50321	0.857499	0.894217	0.820254	0.831532	0.872425	0.834397	0.84006	0.792406	0.813362	0.885243	0.859195	0.875123		50321	0.847976	0.0311163	0.00898249
51321	102312	107351	44605	35306	38590	25293	49481	23115	28999	76400	25098	27569															51321	0.859137	0.895577	0.82206	0.831532	0.875374	0.836547	0.842273	0.793539	0.816092	0.887124	0.862563	0.875123		51321	0.849745	0.0311463	0.00899115
52321	102507	107416	44670	35371	38623	25358	49514	23147	29097	76530	25065	27634															52321	0.860774	0.896119	0.823258	0.833062	0.876123	0.838697	0.842835	0.794638	0.81885	0.888633	0.861429	0.877186		52321	0.850967	0.0308853	0.00891582
53321	102669	107611	44800	35404	38753	25423	49676	23212	29194	76693	25163	27666															53321	0.862134	0.897746	0.825654	0.83384	0.879072	0.840847	0.845592	0.796869	0.821579	0.890526	0.864797	0.878202		53321	0.853072	0.0307531	0.00887764
54321	102897	107741	44897	35469	38785	25456	49774	23245	29259	76790	25228	27666															54321	0.864049	0.89883	0.827442	0.835371	0.879798	0.841938	0.84726	0.798002	0.823409	0.891652	0.867031	0.878202		54321	0.854415	0.0305441	0.00881732
55321	103059	107871	44962	35502	38883	25521	49871	23310	29357	76921	25261	27764															55321	0.865409	0.899915	0.82864	0.836148	0.882021	0.844088	0.848911	0.800233	0.826166	0.893174	0.868165	0.881313		55321	0.856182	0.0304498	0.00879011
56321	103189	107936	45092	35599	38883	25586	49936	23342	29422	77116	25293	27731															56321	0.866501	0.900457	0.831036	0.838432	0.882021	0.846238	0.850018	0.801332	0.827996	0.895438	0.869265	0.880265		56321	0.857417	0.0299933	0.00865831
57321	103384	108066	45190	35599	38948	25618	50034	23407	29487	77148	25326	27796															57321	0.868138	0.901542	0.832842	0.838432	0.883495	0.847296	0.851686	0.803563	0.829825	0.895809	0.870399	0.882329		57321	0.85878	0.0297627	0.00859174
58321	103482	108164	45255	35664	38980	25716	50131	23440	29519	77376	25391	27829															58321	0.868961	0.902359	0.83404	0.839963	0.884221	0.850537	0.853337	0.804696	0.830726	0.898457	0.872633	0.883376		58321	0.860276	0.0298026	0.00860327
59321	103612	108326	45320	35729	39013	25716	50196	23472	29617	77473	25456	27861															59321	0.870053	0.903711	0.835238	0.841494	0.88497	0.850537	0.854444	0.805795	0.833483	0.899583	0.874867	0.884392		59321	0.861547	0.0297056	0.00857526
60321	103807	108391	45385	35729	39110	25748	50327	23505	29650	77571	25456	27894															60321	0.87169	0.904253	0.836436	0.841494	0.88717	0.851596	0.856674	0.806928	0.834412	0.900721	0.874867	0.885439		60321	0.86264	0.0297364	0.00858416
61321	103970	108456	45450	35794	39143	25846	50359	23505	29747	77603	25488	27861															61321	0.873059	0.904795	0.837634	0.843025	0.887919	0.854837	0.857218	0.806928	0.837142	0.901093	0.875967	0.884392		61321	0.863667	0.029381	0.00848156
62321	104100	108586	45515	35892	39240	25878	50424	23570	29747	77798	25521	27959															62321	0.874151	0.90588	0.838832	0.845333	0.890119	0.855895	0.858325	0.809159	0.837142	0.903357	0.877101	0.887503		62321	0.865233	0.0295459	0.00852916
63321	104230	108619	45612	35924	39273	25911	50522	23602	29812	77896	25521	27959															63321	0.875242	0.906155	0.840619	0.846087	0.890867	0.856987	0.859993	0.810258	0.838971	0.904495	0.877101	0.887503		63321	0.86619	0.0292	0.00842932
64321	104327	108716	45677	35957	39338	25976	50619	23668	29910	77993	25553	27991															64321	0.876057	0.906964	0.841817	0.846864	0.892342	0.859137	0.861644	0.812524	0.841729	0.905621	0.878201	0.888519		64321	0.867618	0.028815	0.00831817
65321	104392	108846	45710	35957	39338	26008	50684	23668	29975	78058	25618	27991															65321	0.876603	0.908049	0.842425	0.846864	0.892342	0.860195	0.86275	0.812524	0.843558	0.906376	0.880434	0.888519		65321	0.868387	0.0288905	0.00833997
66321	104522	108944	45808	35989	39403	26041	50717	23700	30007	78156	25618	28024															66321	0.877694	0.908866	0.844231	0.847618	0.893816	0.861287	0.863312	0.813622	0.844459	0.907514	0.880434	0.889566		66321	0.869368	0.0288376	0.0083247
67321	104685	109009	45840	36022	39435	26041	50782	23733	30040	78253	25651	28089															67321	0.879063	0.909409	0.844821	0.848395	0.894542	0.861287	0.864419	0.814755	0.845388	0.90864	0.881569	0.891629		67321	0.870326	0.0289145	0.00834691
68321	104750	109041	45938	36054	39435	26106	50847	23798	30105	78319	25748	28024															68321	0.879609	0.909676	0.846627	0.849149	0.894542	0.863436	0.865525	0.816987	0.847217	0.909407	0.884902	0.889566		68321	0.871387	0.0282476	0.00815438
69321	104913	109106	46035	36054	39500	26171	50879	23830	30137	78481	25716	28089															69321	0.880978	0.910218	0.848415	0.849149	0.896017	0.865586	0.86607	0.818085	0.848117	0.911288	0.883802	0.891629		69321	0.872446	0.0283095	0.00817224
70321	104978	109171	46003	36184	39468	26203	50912	23863	30202	78514	25748	28089															70321	0.881524	0.91076	0.847825	0.85221	0.895291	0.866645	0.866631	0.819218	0.849947	0.911671	0.884902	0.891629		70321	0.873188	0.0278796	0.00804814
71321	105140	109236	46068	36184	39598	26203	51009	23895	30235	78611	25781	28089															71321	0.882884	0.911302	0.849023	0.85221	0.89824	0.866645	0.868283	0.820317	0.850875	0.912797	0.886036	0.891629		71321	0.874187	0.0279943	0.00808127
72321	105205	109334	46100	36217	39630	26236	51042	23928	30300	78611	25781	28122															72321	0.88343	0.91212	0.849613	0.852988	0.898966	0.867736	0.868844	0.821449	0.852704	0.912797	0.886036	0.892677		72321	0.874947	0.0277499	0.00801071
73321	105335	109367	46165	36184	39663	26268	51107	23928	30300	78741	25781	28187															73321	0.884521	0.912395	0.850811	0.85221	0.899714	0.868794	0.869951	0.821449	0.852704	0.914307	0.886036	0.89474		73321	0.875636	0.0280984	0.00811131
74321	105433	109432	46230	36282	39663	26333	51204	23960	30365	78774	25846	28154															74321	0.885344	0.912938	0.852009	0.854518	0.899714	0.870944	0.871602	0.822548	0.854534	0.91469	0.88827	0.893693		74321	0.876734	0.0275812	0.00796201
75321	105530	109464	46230	36314	39728	26366	51269	23993	30430	78806	25878	28187															75321	0.886159	0.913205	0.852009	0.855272	0.901189	0.872036	0.872708	0.823681	0.856363	0.915061	0.88937	0.89474		75321	0.877649	0.0274684	0.00792943
76321	105563	109529	46328	36314	39728	26366	51269	23960	30430	78904	25878	28252															76321	0.886436	0.913747	0.853815	0.855272	0.901189	0.872036	0.872708	0.822548	0.856363	0.916199	0.88937	0.896803		76321	0.878041	0.0278582	0.00804196
77321	105725	109562	46360	36347	39760	26398	51302	24025	30462	79001	25911	28252															77321	0.887796	0.914022	0.854405	0.856049	0.901915	0.873094	0.87327	0.824779	0.857263	0.917326	0.890504	0.896803		77321	0.878936	0.0275662	0.00795767
78321	105725	109627	46425	36379	39760	26431	51399	24090	30462	79034	25943	28252															78321	0.887796	0.914564	0.855603	0.856803	0.901915	0.874186	0.874921	0.827011	0.857263	0.917709	0.891604	0.896803		78321	0.879682	0.0271213	0.00782924
79321	105855	109724	46458	36379	39825	26431	51432	24090	30527	79099	25943	28284															79321	0.888888	0.915374	0.856211	0.856803	0.903389	0.874186	0.875483	0.827011	0.859093	0.918464	0.891604	0.897819		79321	0.88036	0.0273206	0.00788679
80321	105920	109724	46458	36444	39825	26496	51497	24123	30560	79196	25976	28284															80321	0.889434	0.915374	0.856211	0.858334	0.903389	0.876335	0.876589	0.828144	0.860021	0.91959	0.892738	0.897819		80321	0.881165	0.0270804	0.00781743
81321	106050	109789	46523	36477	39923	26496	51497	24155	30625	79164	26008	28317															81321	0.890525	0.915916	0.857409	0.859111	0.905612	0.876335	0.876589	0.829242	0.861851	0.919218	0.893838	0.898867		81321	0.882043	0.0269168	0.00777021
82321	106148	109919	46523	36477	39891	26561	51529	24155	30657	79229	26041	28317															82321	0.891348	0.917	0.857409	0.859111	0.904886	0.878485	0.877134	0.829242	0.862751	0.919973	0.894972	0.898867		82321	0.882598	0.027044	0.00780693
83321	106213	109952	46555	36542	39923	26528	51562	24188	30690	79326	26041	28317															83321	0.891894	0.917276	0.857999	0.860642	0.905612	0.877394	0.877696	0.830375	0.86368	0.921099	0.894972	0.898867		83321	0.883125	0.0268647	0.00775517
84321	106278	109984	46653	36574	39956	26594	51627	24220	30690	79326	26073	28349															84321	0.89244	0.917543	0.859805	0.861396	0.906361	0.879577	0.878802	0.831474	0.86368	0.921099	0.896072	0.899883		84321	0.884011	0.0266041	0.00767994
85321	106376	110049	46653	36607	39923	26594	51659	24253	30722	79424	26073	28349															85321	0.893263	0.918085	0.859805	0.862173	0.905612	0.879577	0.879347	0.832607	0.86458	0.922237	0.896072	0.899883		85321	0.884437	0.026447	0.0076346
86321	106441	110049	46750	36574	40021	26626	51725	24285	30755	79489	26138	28382															86321	0.893809	0.918085	0.861592	0.861396	0.907835	0.880635	0.88047	0.833705	0.865509	0.922992	0.898306	0.90093		86321	0.885439	0.026494	0.00764815
87321	106538	110147	46783	36607	40021	26659	51757	24285	30820	79554	26106	28414															87321	0.894623	0.918902	0.862201	0.862173	0.907835	0.881726	0.881015	0.833705	0.867338	0.923747	0.897206	0.901946		87321	0.886035	0.0264551	0.00763694
88321	106571	110147	46783	36672	40021	26691	51790	24350	30787	79554	26106	28382															88321	0.8949	0.918902	0.862201	0.863704	0.907835	0.882785	0.881577	0.835937	0.86641	0.923747	0.897206	0.90093		88321	0.886344	0.0259264	0.00748432
89321	106636	110244	46848	36737	40053	26724	51822	24350	30852	79586	26203	28382															89321	0.895446	0.919712	0.863398	0.865235	0.908561	0.883876	0.882122	0.835937	0.868239	0.924118	0.90054	0.90093		89321	0.887343	0.0259085	0.00747914
90321	106831	110309	46815	36639	40086	26691	51855	24383	30885	79651	26171	28414															90321	0.897084	0.920254	0.86279	0.862927	0.90931	0.882785	0.882683	0.83707	0.869168	0.924873	0.89944	0.901946		90321	0.887527	0.0261594	0.00755157
101621	107578	110797	47238	36965	40281	26951	52245	24643	31210	80107	26366	28609															101621	0.903356	0.924325	0.870586	0.870605	0.913733	0.891384	0.889322	0.845995	0.878314	0.930168	0.906142	0.908136		101621	0.894339	0.0247263	0.00713788
111621	108326	111382	47531	37225	40443	27114	52570	24903	31438	80497	26528	28707															111621	0.909637	0.929205	0.875986	0.876728	0.917408	0.896775	0.894854	0.854921	0.88473	0.934697	0.911709	0.911247		111621	0.899825	0.0236188	0.00681816
121621	109009	111935	47823	37452	40573	27276	52862	25196	31665	80692	26691	28869															121621	0.915373	0.933819	0.881367	0.882074	0.920357	0.902133	0.899825	0.86498	0.891118	0.936961	0.917311	0.916389		121621	0.905142	0.0221356	0.00639001
131621	109789	112488	48148	37712	40703	27439	53122	25488	31925	80919	26854	28967															131621	0.921923	0.938432	0.887357	0.888198	0.923306	0.907524	0.90425	0.875004	0.898435	0.939597	0.922913	0.9195		131621	0.910537	0.0205442	0.00593061
141621	110569	113138	48473	37972	40898	27634	53383	25748	32153	81212	27016	29129															141621	0.928472	0.943855	0.893347	0.894322	0.927729	0.913974	0.908693	0.88393	0.904852	0.942999	0.928481	0.924642		141621	0.916275	0.0195887	0.00565477
151621	111252	113723	48799	38200	40996	27764	53708	26041	32380	81472	27146	29292															151621	0.934208	0.948735	0.899355	0.899691	0.929952	0.918274	0.914225	0.893989	0.91124	0.946018	0.932948	0.929816		151621	0.921538	0.0182595	0.00527106
161621	111967	114308	49156	38493	41191	27926	54000	26301	32543	81602	27309	29454															161621	0.940212	0.953616	0.905934	0.906592	0.934375	0.923632	0.919196	0.902915	0.915827	0.947527	0.93855	0.934959		161621	0.926945	0.017037	0.00491815
171621	112585	114861	49481	38818	41321	28122	54293	26594	32803	81862	27504	29617															171621	0.945401	0.958229	0.911924	0.914247	0.937324	0.930114	0.924183	0.912973	0.923144	0.950546	0.945252	0.940133		171621	0.932789	0.0156597	0.00452056
181621	113268	115414	49871	39078	41451	28284	54585	26854	33063	82122	27634	29812															181621	0.951137	0.962842	0.919112	0.92037	0.940273	0.935472	0.929154	0.921899	0.930461	0.953565	0.94972	0.946323		181621	0.938361	0.014493	0.00418377
191621	113918	115901	50196	39338	41646	28382	54911	27049	33258	82285	27699	29942															191621	0.956595	0.966905	0.925101	0.926494	0.944696	0.938713	0.934703	0.928593	0.935949	0.955458	0.951954	0.950449		191621	0.942968	0.0134411	0.00388012
201621	114503	116389	50489	39630	41776	28577	55171	27276	33421	82577	27894	30105															201621	0.961507	0.970976	0.930501	0.933371	0.947645	0.945163	0.939129	0.936386	0.940536	0.958849	0.958656	0.955623		201621	0.948195	0.0127811	0.00368959
211621	115056	116779	50814	39891	41971	28739	55463	27536	33648	82773	28024	30267															211621	0.966151	0.97423	0.936491	0.939518	0.952069	0.950521	0.944099	0.945312	0.946924	0.961124	0.963123	0.960766		211621	0.953361	0.0116285	0.00335687
221621	115544	117234	51139	40118	42101	28869	55788	27699	33908	82968	28154	30397															221621	0.970249	0.978026	0.942481	0.944864	0.955018	0.954821	0.949631	0.950908	0.954241	0.963389	0.967591	0.964892		221621	0.958009	0.0108143	0.00312183
231621	116031	117592	51399	40346	42231	28999	56016	27926	34039	83195	28187	30560															231621	0.974338	0.981012	0.947272	0.950234	0.957967	0.95912	0.953513	0.958701	0.957928	0.966025	0.968725	0.970066		231621	0.962075	0.0100884	0.00291226
241621	116454	117917	51725	40606	42394	29129	56309	28024	34234	83358	28284	30657															241621	0.97789	0.983724	0.953281	0.956358	0.961664	0.96342	0.9585	0.962065	0.963415	0.967917	0.972059	0.973145		241621	0.96612	0.00907245	0.00261899
251621	116812	118307	51952	40801	42524	29259	56504	28219	34331	83553	28414	30755															251621	0.980896	0.986977	0.957464	0.960951	0.964613	0.96772	0.961819	0.96876	0.966145	0.970181	0.976527	0.976256		251621	0.969859	0.008765	0.00253024
261621	117039	118535	52245	40963	42686	29389	56731	28349	34494	83780	28512	30820															261621	0.982802	0.988879	0.962864	0.964766	0.968288	0.972019	0.965683	0.973223	0.970732	0.972817	0.979895	0.97832		261621	0.973357	0.00783356	0.00226135
271621	117364	118730	52440	41093	42784	29454	56959	28479	34624	84008	28544	30950															271621	0.985532	0.990506	0.966458	0.967828	0.970511	0.974169	0.969564	0.977685	0.974391	0.975465	0.980995	0.982446		271621	0.976296	0.00741734	0.0021412
281621	117657	118925	52635	41256	42914	29552	57121	28577	34786	84138	28609	31015															281621	0.987992	0.992133	0.970052	0.971667	0.97346	0.97741	0.972322	0.98105	0.97895	0.976974	0.983229	0.984509		281621	0.979146	0.00688401	0.00198724
291621	117949	119120	52895	41419	43044	29650	57349	28674	34819	84333	28707	31113															291621	0.990444	0.99376	0.974843	0.975506	0.976409	0.980652	0.976203	0.98438	0.979878	0.979239	0.986597	0.98762		291621	0.982127	0.00632443	0.00182571
301621	118144	119282	53025	41581	43142	29747	57511	28772	34949	84528	28707	31210															301621	0.992081	0.995111	0.977239	0.979321	0.978632	0.98386	0.978961	0.987744	0.983537	0.981503	0.986597	0.990699		301621	0.984607	0.00586416	0.00169284
311621	118307	119380	53188	41711	43304	29845	57609	28837	35046	84626	28837	31178															311621	0.99345	0.995929	0.980243	0.982383	0.982307	0.987101	0.980629	0.989976	0.986267	0.982641	0.991064	0.989684		311621	0.986806	0.00524487	0.00151406
321621	118437	119477	53350	41841	43402	29910	57772	28934	35111	84821	28869	31275															321621	0.994542	0.996738	0.983229	0.985445	0.98453	0.989251	0.983403	0.993306	0.988096	0.984905	0.992164	0.992763		321621	0.989031	0.00475	0.00137121
331621	118600	119640	53513	41906	43434	29975	57902	28967	35209	84951	28902	31275															331621	0.995911	0.998098	0.986233	0.986976	0.985255	0.991401	0.985616	0.994439	0.990854	0.986414	0.993298	0.992763		331621	0.990605	0.00442046	0.00127608
341621	118730	119640	53610	42004	43532	29975	58064	28967	35306	85081	28902	31340															341621	0.997002	0.998098	0.988021	0.989284	0.987478	0.991401	0.988374	0.994439	0.993584	0.987924	0.993298	0.994826		341621	0.991977	0.00374294	0.00108049
351621	118827	119738	53740	42101	43629	30040	58194	29064	35306	85113	28999	31373															351621	0.997817	0.998915	0.990417	0.991568	0.989679	0.993551	0.990587	0.997769	0.993584	0.988296	0.996632	0.995873		351621	0.993724	0.00362374	0.00104608
361621	118925	119770	53805	42199	43694	30072	58227	29032	35339	85243	28999	31438															361621	0.99864	0.999182	0.991614	0.993876	0.991153	0.994609	0.991148	0.99667	0.994512	0.989805	0.996632	0.997937		361621	0.994648	0.00320605	0.000925507
371621	118925	119868	53935	42199	43759	30072	58292	29064	35404	85406	29032	31470															371621	0.99864	1	0.99401	0.993876	0.992628	0.994609	0.992255	0.997769	0.996342	0.991698	0.997766	0.998952		371621	0.995712	0.00288198	0.000831957
381621	119055	119835	54000	42296	43824	30137	58422	29129	35469	85503	28999	31470															381621	0.999731	0.999725	0.995208	0.996161	0.994102	0.996759	0.994468	1	0.998171	0.992824	0.996632	0.998952		381621	0.996894	0.00243626	0.000703288
391621	119087	119835	54065	42361	43857	30202	58519	29129	35469	85666	29032	31405															391621	1	0.999725	0.996406	0.997692	0.994851	0.998909	0.996119	1	0.998171	0.994717	0.997766	0.996889		391621	0.997604	0.00186118	0.000537276
401621	119055	119803	54098	42361	43889	30170	58519	29097	35469	85666	29032	31438															401621	0.999731	0.999458	0.997014	0.997692	0.995577	0.99785	0.996119	0.998901	0.998171	0.994717	0.997766	0.997937		401621	0.997578	0.00151246	0.000436609
411621	119022	119770	54130	42426	43987	30170	58617	29129	35502	85699	29064	31503															411621	0.999454	0.999182	0.997604	0.999223	0.9978	0.99785	0.997787	1	0.999099	0.9951	0.998866	1		411621	0.998497	0.00137099	0.000395771
421621	119055	119738	54163	42426	43987	30235	58649	29097	35534	85829	29064	31470															421621	0.999731	0.998915	0.998212	0.999223	0.9978	1	0.998332	0.998901	1	0.996609	0.998866	0.998952		421621	0.998795	0.000969576	0.000279893
431621	119022	119770	54228	42426	44019	30235	58617	29064	35534	85894	29032	31438															431621	0.999454	0.999182	0.99941	0.999223	0.998526	1	0.997787	0.997769	1	0.997364	0.997766	0.997937		431621	0.998701	0.000950114	0.000274274
441621	118990	119705	54260	42394	44052	30202	58714	29097	35502	85926	29032	31373															441621	0.999185	0.99864	1	0.998469	0.999274	0.998909	0.999438	0.998901	0.999099	0.997736	0.997766	0.995873		441621	0.998608	0.0010783	0.000311279
451621	118957	119640	54228	42426	44052	30170	58682	29064	35502	85894	29097	31405															451621	0.998908	0.998098	0.99941	0.999223	0.999274	0.99785	0.998894	0.997769	0.999099	0.997364	1	0.996889		451621	0.998565	0.00094554	0.000272954
461621	118892	119542	54228	42459	44019	30170	58747	28999	35502	86056	29032	31373															461621	0.998363	0.99728	0.99941	1	0.998526	0.99785	1	0.995537	0.999099	0.999245	0.997766	0.995873		461621	0.998246	0.00146517	0.000422958
471621	118860	119380	54228	42394	44084	30137	58714	29032	35436	85991	29032	31340															471621	0.998094	0.995929	0.99941	0.998469	1	0.996759	0.999438	0.99667	0.997242	0.99849	0.997766	0.994826		471621	0.997758	0.00154115	0.00044489
481621	118762	119445	54195	42361	44052	30137	58682	28967	35469	86056	29032	31308															481621	0.997271	0.996471	0.998802	0.997692	0.999274	0.996759	0.998894	0.994439	0.998171	0.999245	0.997766	0.99381		481621	0.997383	0.00178049	0.000513985
491621	118632	119347	54163	42361	44052	30072	58714	28869	35436	86056	28999	31275															491621	0.996179	0.995654	0.998212	0.997692	0.999274	0.994609	0.999438	0.991074	0.997242	0.999245	0.996632	0.992763		491621	0.996501	0.00263869	0.000761724
501621	118600	119250	54130	42329	44052	30040	58682	28869	35404	86056	28999	31243															501621	0.995911	0.994844	0.997604	0.996938	0.999274	0.993551	0.998894	0.991074	0.996342	0.999245	0.996632	0.991747		501621	0.996005	0.0027517	0.000794346
511621	118437	119055	54130	42329	43987	30040	58682	28837	35371	86056	28902	31210															511621	0.994542	0.993218	0.997604	0.996938	0.9978	0.993551	0.998894	0.989976	0.995413	0.999245	0.993298	0.990699		511621	0.995098	0.00307094	0.000886505
521621	118307	118957	54098	42264	44019	30007	58617	28804	35339	86089	28902	31178															521621	0.99345	0.9924	0.997014	0.995407	0.998526	0.992459	0.997787	0.988843	0.994512	0.999628	0.993298	0.989684		521621	0.994417	0.00339384	0.000979717
531621	118210	118860	54000	42231	44019	29910	58584	28739	35274	86056	28869	31113															531621	0.992636	0.991591	0.995208	0.99463	0.998526	0.989251	0.997225	0.986611	0.992683	0.999245	0.992164	0.98762		531621	0.993116	0.00406194	0.00117258
541621	118014	118762	53968	42199	43954	29910	58584	28674	35241	86121	28837	31080															541621	0.99099	0.990773	0.994619	0.993876	0.997051	0.989251	0.997225	0.98438	0.991754	1	0.991064	0.986573		541621	0.992296	0.00451949	0.00130466
551621	117949	118600	53870	42134	43922	29845	58487	28642	35241	86089	28804	30982															551621	0.990444	0.989422	0.992812	0.992346	0.996325	0.987101	0.995574	0.983281	0.991754	0.999628	0.98993	0.983462		551621	0.991007	0.00490773	0.00141674
561621	117819	118502	53805	42101	43922	29780	58487	28577	35144	86024	28804	30982															561621	0.989352	0.988604	0.991614	0.991568	0.996325	0.984951	0.995574	0.98105	0.989025	0.998874	0.98993	0.983462		561621	0.990028	0.005279	0.00152392
571621	117657	118372	53740	42036	43857	29780	58357	28544	35111	86024	28739	30950															571621	0.987992	0.98752	0.990417	0.990037	0.994851	0.984951	0.993361	0.979917	0.988096	0.998874	0.987696	0.982446		571621	0.988846	0.00523203	0.00151036
581621	117462	118177	53675	41939	43857	29715	58292	28447	35046	85991	28739	30885															581621	0.986355	0.985893	0.989219	0.987753	0.994851	0.982801	0.992255	0.976587	0.986267	0.99849	0.987696	0.980383		581621	0.987379	0.00601179	0.00173545
591621	117332	118079	53610	41841	43759	29650	58259	28382	34981	85991	28674	30787															591621	0.985263	0.985075	0.988021	0.985445	0.992628	0.980652	0.991693	0.974355	0.984437	0.99849	0.985462	0.977272		591621	0.985733	0.0066085	0.00190771
601621	117234	117949	53545	41841	43727	29617	58259	28317	34916	85959	28674	30820															601621	0.98444	0.983991	0.986823	0.985445	0.991902	0.97956	0.991693	0.972124	0.982608	0.998119	0.985462	0.97832		601621	0.985041	0.00684451	0.00197584
611621	116974	117884	53448	41744	43694	29585	58194	28252	34851	85926	28642	30722															611621	0.982257	0.983448	0.985035	0.98316	0.991153	0.978502	0.990587	0.969893	0.980779	0.997736	0.984363	0.975209		611621	0.98351	0.00740091	0.00213646
621621	116909	117657	53350	41679	43694	29552	58064	28187	34851	85894	28544	30657															621621	0.981711	0.981555	0.983229	0.981629	0.991153	0.97741	0.988374	0.967661	0.980779	0.997364	0.980995	0.973145		621621	0.982084	0.00780377	0.00225275
631621	116714	117494	53253	41614	43597	29454	58032	28154	34754	85796	28512	30657															631621	0.980073	0.980195	0.981441	0.980098	0.988953	0.974169	0.987829	0.966528	0.978049	0.996226	0.979895	0.973145		631621	0.98055	0.00780169	0.00225215
641621	116584	117299	53155	41549	43532	29422	57967	28056	34689	85699	28512	30592															641621	0.978982	0.978568	0.979635	0.978568	0.987478	0.973111	0.986723	0.963164	0.97622	0.9951	0.979895	0.971082		641621	0.979044	0.00824718	0.00238076
651621	116421	117234	53057	41484	43499	29357	57869	28024	34624	85731	28414	30560															651621	0.977613	0.978026	0.977829	0.977037	0.98673	0.970961	0.985055	0.962065	0.974391	0.995471	0.976527	0.970066		651621	0.977648	0.00859414	0.00248092
661621	116291	117104	53025	41419	43434	29324	57804	27926	34591	85699	28447	30462															661621	0.976521	0.976941	0.977239	0.975506	0.985255	0.969869	0.983948	0.958701	0.973462	0.9951	0.977661	0.966956		661621	0.97643	0.009255	0.00267169
671621	116064	116877	52862	41353	43369	29292	57642	27926	34494	85601	28382	30430															671621	0.974615	0.975048	0.974235	0.973951	0.983781	0.968811	0.981191	0.958701	0.970732	0.993962	0.975427	0.96594		671621	0.974699	0.0089452	0.00258226
681621	115966	116779	52765	41288	43337	29194	57642	27861	34429	85536	28317	30397															681621	0.973792	0.97423	0.972447	0.97242	0.983055	0.96557	0.981191	0.956469	0.968903	0.993207	0.973193	0.964892		681621	0.973281	0.00948387	0.00273776
691621	115804	116649	52732	41191	43304	29227	57511	27829	34364	85471	28252	30365															691621	0.972432	0.973145	0.971839	0.970136	0.982307	0.966661	0.978961	0.955371	0.967074	0.992452	0.970959	0.963876		691621	0.972101	0.00941095	0.00271671
701621	115706	116519	52602	41126	43174	29162	57511	27731	34364	85406	28252	30332															701621	0.971609	0.972061	0.969443	0.968605	0.979358	0.964511	0.978961	0.952007	0.967074	0.991698	0.970959	0.962829		701621	0.97076	0.00979617	0.00282791
711621	115479	116324	52472	41061	43142	29097	57349	27699	34266	85373	28219	30267															711621	0.969703	0.970434	0.967048	0.967074	0.978632	0.962362	0.976203	0.950908	0.964316	0.991315	0.969825	0.960766		711621	0.969049	0.0100655	0.00290565
721621	115381	116226	52407	40963	43174	29064	57284	27634	34201	85308	28219	30267															721621	0.96888	0.969617	0.96585	0.964766	0.979358	0.96127	0.975097	0.948677	0.962487	0.99056	0.969825	0.960766		721621	0.968096	0.0104942	0.00302942
731621	115218	116096	52342	40898	43044	29032	57154	27634	34201	85276	28154	30235															731621	0.967511	0.968532	0.964652	0.963235	0.976409	0.960212	0.972884	0.948677	0.962487	0.990188	0.967591	0.95975		731621	0.966844	0.0101711	0.00293613
741621	115088	115966	52212	40801	42979	28999	57154	27569	34169	85243	28122	30170															741621	0.96642	0.967448	0.962256	0.960951	0.974934	0.95912	0.972884	0.946445	0.961586	0.989805	0.966491	0.957687		741621	0.965502	0.0106654	0.00307884
751621	115023	115934	52147	40768	42947	28934	56991	27471	34071	85113	28122	30137															751621	0.965874	0.967181	0.961058	0.960173	0.974208	0.95697	0.970109	0.943081	0.958828	0.988296	0.966491	0.956639		751621	0.964076	0.0110488	0.00318951
761621	114893	115771	52082	40671	42914	28934	56959	27406	34039	85081	28089	30105															761621	0.964782	0.965821	0.95986	0.957889	0.97346	0.95697	0.969564	0.940849	0.957928	0.987924	0.965357	0.955623		761621	0.963002	0.0114158	0.00329546
771621	114763	115674	51952	40606	42849	28902	56861	27439	33908	85048	28024	30072															771621	0.96369	0.965012	0.957464	0.956358	0.971985	0.955912	0.967896	0.941982	0.954241	0.987541	0.963123	0.954576		771621	0.961648	0.0112977	0.00326136
781621	114633	115511	51887	40541	42784	28837	56829	27341	33876	84983	27991	30007															781621	0.962599	0.963652	0.956266	0.954827	0.970511	0.953762	0.967352	0.938618	0.95334	0.986786	0.961989	0.952512		781621	0.960185	0.0118432	0.00341883
791621	114568	115381	51790	40443	42751	28869	56764	27309	33876	84918	27959	30040															791621	0.962053	0.962567	0.954478	0.952519	0.969762	0.954821	0.966245	0.937519	0.95334	0.986031	0.960889	0.95356		791621	0.959482	0.0117736	0.00339875
801621	114373	115316	51692	40411	42719	28804	56601	27341	33778	84853	27959	30007															801621	0.960415	0.962025	0.952672	0.951765	0.969036	0.952671	0.96347	0.938618	0.950583	0.985277	0.960889	0.952512		801621	0.958328	0.0116044	0.00334991
811621	114373	115186	51692	40378	42654	28739	56569	27276	33746	84788	27926	29975															811621	0.960415	0.96094	0.952672	0.950988	0.967562	0.950521	0.962926	0.936386	0.949682	0.984522	0.959755	0.951497		811621	0.957322	0.0118447	0.00341927
821621	114341	115088	51594	40313	42589	28707	56471	27211	33713	84756	27894	29975															821621	0.960147	0.960123	0.950866	0.949457	0.966087	0.949463	0.961258	0.934155	0.948753	0.98415	0.958656	0.951497		821621	0.956218	0.0121521	0.00350801
831621	114178	114991	51497	40248	42556	28739	56439	27244	33648	84658	27829	29942															831621	0.958778	0.959314	0.949079	0.947926	0.965339	0.950521	0.960713	0.935288	0.946924	0.983012	0.956422	0.950449		831621	0.955314	0.0118229	0.00341299
841621	114113	114958	51432	40183	42524	28739	56374	27211	33648	84658	27861	29910															841621	0.958232	0.959038	0.947881	0.946395	0.964613	0.950521	0.959606	0.934155	0.946924	0.983012	0.957521	0.949433		841621	0.954778	0.0120844	0.00348845
851621	113951	114828	51367	40151	42556	28707	56341	27146	33583	84593	27829	29877															851621	0.956872	0.957954	0.946683	0.945642	0.965339	0.949463	0.959045	0.931924	0.945095	0.982258	0.956422	0.948386		851621	0.953757	0.0125181	0.00361366
861621	113983	114796	51302	40151	42459	28674	56244	27114	33518	84463	27796	29812															861621	0.957141	0.957687	0.945485	0.945642	0.963139	0.948371	0.957394	0.930825	0.943266	0.980748	0.955287	0.946323		861621	0.952609	0.0124232	0.00358626
871621	113788	114601	51237	40086	42459	28707	56146	27179	33486	84528	27764	29812															871621	0.955503	0.95606	0.944287	0.944111	0.963139	0.949463	0.955725	0.933056	0.942365	0.981503	0.954188	0.946323		871621	0.952143	0.0122614	0.00353955
881621	113755	114568	51172	40021	42361	28674	56081	27081	33453	84431	27731	29877															881621	0.955226	0.955785	0.943089	0.94258	0.960916	0.948371	0.954619	0.929692	0.941436	0.980376	0.953054	0.948386		881621	0.951127	0.012475	0.00360123
891621	113690	114568	51139	39956	42426	28609	56048	27081	33421	84333	27731	29812															891621	0.95468	0.955785	0.942481	0.941049	0.96239	0.946221	0.954057	0.929692	0.940536	0.979239	0.953054	0.946323		891621	0.950459	0.0126256	0.00364471
901621	113593	114503	51074	39956	42361	28642	55983	27081	33388	84366	27699	29780															901621	0.953866	0.955242	0.941283	0.941049	0.960916	0.947313	0.952951	0.929692	0.939607	0.979622	0.951954	0.945307		901621	0.9499	0.0126391	0.00364859
911621	113593	114341	51074	39891	42329	28609	55983	27016	33356	84301	27699	29780															911621	0.953866	0.953891	0.941283	0.939518	0.96019	0.946221	0.952951	0.927461	0.938707	0.978867	0.951954	0.945307		911621	0.949184	0.0128964	0.00372287
921621	113495	114341	50977	39891	42361	28577	55853	27049	33356	84268	27699	29780															921621	0.953043	0.953891	0.939495	0.939518	0.960916	0.945163	0.950738	0.928593	0.938707	0.978484	0.951954	0.945307		921621	0.948817	0.0127703	0.00368646
931621	113398	114341	50977	39858	42296	28577	55853	27016	33323	84236	27666	29780															931621	0.952228	0.953891	0.939495	0.938741	0.959441	0.945163	0.950738	0.927461	0.937778	0.978112	0.95082	0.945307		931621	0.948265	0.0128082	0.00369742
941621	113430	114211	50879	39825	42296	28577	55821	27016	33258	84138	27699	29747															941621	0.952497	0.952806	0.937689	0.937964	0.959441	0.945163	0.950193	0.927461	0.935949	0.976974	0.951954	0.944259		941621	0.947696	0.0128956	0.00372263
951621	113365	114113	50814	39793	42231	28577	55756	26951	33226	84138	27666	29747															951621	0.951951	0.951989	0.936491	0.93721	0.957967	0.945163	0.949087	0.925229	0.935048	0.976974	0.95082	0.944259		951621	0.946849	0.0132143	0.00381463
961621	113333	114081	50782	39760	42199	28544	55756	26984	33226	84073	27666	29747															961621	0.951682	0.951722	0.935901	0.936433	0.957241	0.944071	0.949087	0.926362	0.935048	0.97622	0.95082	0.944259		961621	0.94657	0.012931	0.00373285
971621	113235	114048	50782	39728	42231	28577	55658	26951	33193	84073	27634	29747															971621	0.950859	0.951447	0.935901	0.935679	0.957967	0.945163	0.947419	0.925229	0.934119	0.97622	0.94972	0.944259		971621	0.946165	0.0131772	0.00380394
981621	113170	113886	50749	39695	42166	28544	55626	26951	33128	84008	27634	29747															981621	0.950314	0.950095	0.935293	0.934902	0.956492	0.944071	0.946874	0.925229	0.93229	0.975465	0.94972	0.944259		981621	0.945417	0.0131014	0.00378204
991621	113105	113951	50684	39728	42166	28512	55561	26919	33161	83943	27634	29715															991621	0.949768	0.950637	0.934095	0.935679	0.956492	0.943013	0.945767	0.924131	0.933219	0.97471	0.94972	0.943244		991621	0.94504	0.0130707	0.00377318
1001621	113105	113788	50684	39663	42199	28512	55593	26919	33096	83910	27601	29715															1001621	0.949768	0.949278	0.934095	0.934148	0.957241	0.943013	0.946312	0.924131	0.93139	0.974327	0.948586	0.943244		1001621	0.944628	0.0132402	0.00382211
1011621	113008	113755	50652	39630	42166	28544	55528	26919	33128	83910	27601	29682															1011621	0.948953	0.949002	0.933505	0.933371	0.956492	0.944071	0.945206	0.924131	0.93229	0.974327	0.948586	0.942196		1011621	0.944344	0.0131587	0.0037986
1021621	112975	113723	50652	39663	42101	28512	55496	26919	33096	83878	27601	29715															1021621	0.948676	0.948735	0.933505	0.934148	0.955018	0.943013	0.944661	0.924131	0.93139	0.973955	0.948586	0.943244		1021621	0.944088	0.0129577	0.00374057
1031621	112975	113593	50619	39598	42101	28512	55463	26886	33031	83813	27601	29682															1031621	0.948676	0.947651	0.932897	0.932617	0.955018	0.943013	0.944099	0.922998	0.92956	0.9732	0.948586	0.942196		1031621	0.943376	0.0132538	0.00382603
1041621	112845	113593	50587	39598	42134	28512	55431	26854	33063	83845	27601	29650															1041621	0.947585	0.947651	0.932307	0.932617	0.955766	0.943013	0.943555	0.921899	0.930461	0.973572	0.948586	0.94118		1041621	0.943183	0.0134816	0.00389181
1051621	112813	113528	50554	39565	42101	28512	55398	26854	32998	83813	27569	29650															1051621	0.947316	0.947108	0.931699	0.93184	0.955018	0.943013	0.942993	0.921899	0.928632	0.9732	0.947486	0.94118		1051621	0.942615	0.0135432	0.00390959
1061621	112780	113463	50554	39565	42134	28512	55431	26854	32998	83715	27601	29650															1061621	0.947039	0.946566	0.931699	0.93184	0.955766	0.943013	0.943555	0.921899	0.928632	0.972063	0.948586	0.94118		1061621	0.942653	0.0133959	0.00386707
1071621	112715	113463	50522	39533	42069	28479	55366	26821	32966	83715	27569	29650															1071621	0.946493	0.946566	0.931109	0.931086	0.954292	0.941922	0.942448	0.920766	0.927731	0.972063	0.947486	0.94118		1071621	0.941929	0.0135478	0.00391092
1081621	112683	113365	50522	39533	42069	28479	55398	26854	32998	83683	27536	29617															1081621	0.946224	0.945749	0.931109	0.931086	0.954292	0.941922	0.942993	0.921899	0.928632	0.971691	0.946352	0.940133		1081621	0.94184	0.0131706	0.00380203
1091621	112585	113333	50489	39533	42036	28512	55333	26821	32966	83650	27504	29650															1091621	0.945401	0.945482	0.930501	0.931086	0.953543	0.943013	0.941886	0.920766	0.927731	0.971308	0.945252	0.94118		1091621	0.941429	0.0132461	0.00382383
1101621	112553	113333	50457	39533	42069	28544	55301	26821	32933	83585	27536	29650															1101621	0.945133	0.945482	0.929912	0.931086	0.954292	0.944071	0.941342	0.920766	0.926802	0.970553	0.946352	0.94118		1101621	0.941414	0.0133335	0.00384904
1111621	112553	113203	50424	39468	42036	28479	55236	26821	32933	83553	27504	29585															1111621	0.945133	0.944397	0.929303	0.929556	0.953543	0.941922	0.940235	0.920766	0.926802	0.970181	0.945252	0.939117		1111621	0.940517	0.0132683	0.00383024
1121621	112520	113203	50457	39468	42004	28479	55268	26789	32901	83618	27536	29617															1121621	0.944855	0.944397	0.929912	0.929556	0.952817	0.941922	0.94078	0.919668	0.925902	0.970936	0.946352	0.940133		1121621	0.940602	0.0135766	0.00391924
1131621	112455	113138	50457	39500	42004	28512	55301	26789	32868	83553	27504	29585															1131621	0.94431	0.943855	0.929912	0.930309	0.952817	0.943013	0.941342	0.919668	0.924973	0.970181	0.945252	0.939117		1131621	0.940396	0.0134194	0.00387386
1141621	112390	113105	50392	39468	41971	28479	55268	26756	32868	83520	27504	29650															1141621	0.943764	0.94358	0.928714	0.929556	0.952069	0.941922	0.94078	0.918535	0.924973	0.969798	0.945252	0.94118		1141621	0.94001	0.0135408	0.00390888
1151621	112293	113040	50424	39468	41939	28479	55236	26756	32868	83488	27471	29552															1151621	0.942949	0.943037	0.929303	0.929556	0.951343	0.941922	0.940235	0.918535	0.924973	0.969427	0.944118	0.938069		1151621	0.939456	0.013292	0.00383708
1161621	112293	112943	50424	39435	42004	28447	55171	26756	32836	83455	27536	29617															1161621	0.942949	0.942228	0.929303	0.928778	0.952817	0.940863	0.939129	0.918535	0.924073	0.969044	0.946352	0.940133		1161621	0.939517	0.0135355	0.00390738
1171621	112260	112943	50424	39403	41939	28512	55203	26724	32836	83455	27504	29585															1171621	0.942672	0.942228	0.929303	0.928025	0.951343	0.943013	0.939674	0.917436	0.924073	0.969044	0.945252	0.939117		1171621	0.939265	0.0136048	0.00392736
1181621	112162	112813	50392	39403	41939	28479	55203	26756	32803	83455	27471	29552															1181621	0.941849	0.941144	0.928714	0.928025	0.951343	0.941922	0.939674	0.918535	0.923144	0.969044	0.944118	0.938069		1181621	0.938798	0.0134831	0.00389224
1191621	112162	112780	50327	39435	41906	28479	55138	26724	32771	83423	27504	29519															1191621	0.941849	0.940868	0.927516	0.928778	0.950594	0.941922	0.938567	0.917436	0.922243	0.968672	0.945252	0.937022		1191621	0.938393	0.0136712	0.00394654
1201621	112097	112683	50392	39403	41906	28447	55106	26724	32738	83358	27439	29585															1201621	0.941303	0.940059	0.928714	0.928025	0.950594	0.940863	0.938022	0.917436	0.921315	0.967917	0.943018	0.939117		1201621	0.938032	0.0134517	0.00388318
1211621	112000	112683	50294	39403	41939	28447	55106	26724	32771	83293	27504	29552															1211621	0.940489	0.940059	0.926907	0.928025	0.951343	0.940863	0.938022	0.917436	0.922243	0.967162	0.945252	0.938069		1211621	0.937989	0.0134617	0.00388607
1221621	111967	112585	50294	39370	41939	28512	55138	26659	32771	83293	27439	29519															1221621	0.940212	0.939241	0.926907	0.927247	0.951343	0.943013	0.938567	0.915205	0.922243	0.967162	0.943018	0.937022		1221621	0.937599	0.0137878	0.00398018
1231621	111935	112488	50327	39370	41906	28479	55073	26659	32738	83325	27439	29519															1231621	0.939943	0.938432	0.927516	0.927247	0.950594	0.941922	0.937461	0.915205	0.921315	0.967534	0.943018	0.937022		1231621	0.937267	0.0137965	0.00398269
1241621	111837	112455	50294	39305	41874	28447	55106	26626	32706	83228	27439	29519															1241621	0.93912	0.938157	0.926907	0.925717	0.949868	0.940863	0.938022	0.914072	0.920414	0.966408	0.943018	0.937022		1241621	0.936632	0.0138721	0.00400452
1251621	111805	112390	50327	39305	41906	28447	55073	26659	32673	83228	27406	29519															1251621	0.938851	0.937615	0.927516	0.925717	0.950594	0.940863	0.937461	0.915205	0.919486	0.966408	0.941884	0.937022		1251621	0.936552	0.013781	0.00397822
1261621	111740	112325	50294	39305	41874	28447	55073	26626	32673	83228	27439	29487															1261621	0.938306	0.937072	0.926907	0.925717	0.949868	0.940863	0.937461	0.914072	0.919486	0.966408	0.943018	0.936006		1261621	0.936265	0.0139467	0.00402607
1271621	111675	112195	50294	39338	41809	28479	55041	26659	32673	83228	27439	29454															1271621	0.93776	0.935988	0.926907	0.926494	0.948394	0.941922	0.936916	0.915205	0.919486	0.966408	0.943018	0.934959		1271621	0.936121	0.0136369	0.00393663
1281621	111707	112195	50262	39338	41841	28479	55073	26594	32673	83130	27406	29487															1281621	0.938029	0.935988	0.926318	0.926494	0.94912	0.941922	0.937461	0.912973	0.919486	0.96527	0.941884	0.936006		1281621	0.935912	0.0137899	0.00398079
1291621	111577	112065	50294	39273	41841	28447	55008	26626	32608	83130	27406	29454															1291621	0.936937	0.934903	0.926907	0.924963	0.94912	0.940863	0.936354	0.914072	0.917656	0.96527	0.941884	0.934959		1291621	0.935324	0.0138392	0.00399503
1301621	111545	112032	50294	39273	41841	28447	54976	26528	32608	83130	27471	29487															1301621	0.936668	0.934628	0.926907	0.924963	0.94912	0.940863	0.935809	0.910708	0.917656	0.96527	0.944118	0.936006		1301621	0.935226	0.014442	0.00416904
1311621	111480	111935	50229	39305	41809	28447	54976	26594	32576	83098	27439	29454															1311621	0.936122	0.933819	0.92571	0.925717	0.948394	0.940863	0.935809	0.912973	0.916756	0.964898	0.943018	0.934959		1311621	0.93492	0.0140315	0.00405056
1321621	111317	111870	50229	39240	41809	28447	55008	26528	32576	83098	27406	29454															1321621	0.934754	0.933277	0.92571	0.924186	0.948394	0.940863	0.936354	0.910708	0.916756	0.964898	0.941884	0.934959		1321621	0.934395	0.0144026	0.00415767
1331621	111317	111837	50262	39240	41809	28447	54943	26561	32543	83065	27406	29422															1331621	0.934754	0.933001	0.926318	0.924186	0.948394	0.940863	0.935248	0.91184	0.915827	0.964515	0.941884	0.933943		1331621	0.934231	0.0142278	0.00410722
1341621	111317	111772	50229	39208	41809	28447	54943	26496	32543	83033	27406	29422															1341621	0.934754	0.932459	0.92571	0.923432	0.948394	0.940863	0.935248	0.909609	0.915827	0.964143	0.941884	0.933943		1341621	0.933855	0.0145693	0.0042058
1351621	111220	111642	50229	39208	41776	28447	54943	26496	32511	83033	27406	29389															1351621	0.933939	0.931375	0.92571	0.923432	0.947645	0.940863	0.935248	0.909609	0.914927	0.964143	0.941884	0.932895		1351621	0.933472	0.0146149	0.00421896
1361621	111122	111577	50164	39208	41776	28414	54911	26496	32511	82968	27374	29454															1361621	0.933116	0.930832	0.924512	0.923432	0.947645	0.939772	0.934703	0.909609	0.914927	0.963389	0.940784	0.934959		1361621	0.93314	0.014438	0.00416789
1371621	111057	111545	50196	39175	41776	28414	54911	26463	32478	83000	27374	29389															1371621	0.93257	0.930565	0.925101	0.922655	0.947645	0.939772	0.934703	0.908476	0.913998	0.96376	0.940784	0.932895		1371621	0.932744	0.0147934	0.00427048
1381621	110960	111382	50164	39143	41744	28414	54846	26496	32445	82968	27406	29389															1381621	0.931756	0.929205	0.924512	0.921901	0.94692	0.939772	0.933597	0.909609	0.913069	0.963389	0.941884	0.932895		1381621	0.932376	0.0147502	0.00425802
1391621	110862	111317	50164	39143	41776	28414	54846	26463	32445	82968	27374	29389															1391621	0.930933	0.928663	0.924512	0.921901	0.947645	0.939772	0.933597	0.908476	0.913069	0.963389	0.940784	0.932895		1391621	0.932136	0.0149326	0.00431067
1401621	110862	111220	50164	39175	41744	28414	54813	26431	32380	82903	27374	29357															1401621	0.930933	0.927854	0.924512	0.922655	0.94692	0.939772	0.933035	0.907378	0.91124	0.962634	0.940784	0.93188		1401621	0.931633	0.0150667	0.00434937
1411621	110797	111122	50099	39078	41711	28414	54813	26431	32413	82903	27374	29357															1411621	0.930387	0.927036	0.923314	0.92037	0.946171	0.939772	0.933035	0.907378	0.912169	0.962634	0.940784	0.93188		1411621	0.931244	0.0151013	0.00435937
1421621	110699	111057	50099	39078	41744	28382	54813	26463	32315	82838	27341	29324															1421621	0.929564	0.926494	0.923314	0.92037	0.94692	0.938713	0.933035	0.908476	0.909411	0.961879	0.93965	0.930832		1421621	0.930722	0.0151128	0.0043627
1431621	110569	110992	50066	39110	41744	28382	54813	26398	32283	82838	27341	29292															1431621	0.928472	0.925952	0.922705	0.921124	0.94692	0.938713	0.933035	0.906245	0.90851	0.961879	0.93965	0.929816		1431621	0.930252	0.0155415	0.00448645
1441621	110569	110895	50099	39045	41679	28382	54781	26431	32315	82838	27309	29292															1441621	0.928472	0.925143	0.923314	0.919593	0.945445	0.938713	0.93249	0.907378	0.909411	0.961879	0.93855	0.929816		1441621	0.930017	0.01515	0.00437342
1451621	110472	110830	50099	39045	41711	28382	54716	26366	32250	82838	27341	29324															1451621	0.927658	0.9246	0.923314	0.919593	0.946171	0.938713	0.931384	0.905146	0.907581	0.961879	0.93965	0.930832		1451621	0.92971	0.0158298	0.00456966
1461621	110342	110797	50001	39045	41711	28414	54781	26366	32315	82740	27309	29324															1461621	0.926566	0.924325	0.921508	0.919593	0.946171	0.939772	0.93249	0.905146	0.909411	0.960741	0.93855	0.930832		1461621	0.929592	0.0155098	0.00447728
1471621	110374	110667	50034	39013	41711	28382	54716	26333	32218	82773	27309	29259															1471621	0.926835	0.923241	0.922116	0.918839	0.946171	0.938713	0.931384	0.904013	0.906681	0.961124	0.93855	0.928769		1471621	0.92887	0.0160366	0.00462936
1481621	110244	110569	50034	38980	41711	28349	54716	26333	32250	82707	27309	29259															1481621	0.925743	0.922423	0.922116	0.918062	0.946171	0.937622	0.931384	0.904013	0.907581	0.960358	0.93855	0.928769		1481621	0.928566	0.0158148	0.00456534
1491621	110179	110504	50001	38980	41679	28414	54748	26333	32185	82707	27276	29227															1491621	0.925198	0.921881	0.921508	0.918062	0.945445	0.939772	0.931928	0.904013	0.905752	0.960358	0.937416	0.927753		1491621	0.928257	0.0160959	0.00464649
1501621	110049	110407	50001	38980	41679	28349	54683	26268	32153	82707	27244	29292															1501621	0.924106	0.921072	0.921508	0.918062	0.945445	0.937622	0.930822	0.901782	0.904852	0.960358	0.936316	0.929816		1501621	0.927647	0.0163768	0.00472759
1511621	110017	110342	49969	38948	41646	28317	54683	26301	32120	82675	27276	29194															1511621	0.923837	0.920529	0.920918	0.917308	0.944696	0.936564	0.930822	0.902915	0.903923	0.959987	0.937416	0.926705		1511621	0.927135	0.0162681	0.00469619
1521621	109952	110179	49936	38948	41646	28349	54683	26268	32088	82642	27244	29227															1521621	0.923291	0.919169	0.92031	0.917308	0.944696	0.937622	0.930822	0.901782	0.903022	0.959603	0.936316	0.927753		1521621	0.926808	0.0165561	0.00477933
1531621	109822	110147	49936	38915	41679	28317	54650	26268	32088	82577	27244	29194															1531621	0.9222	0.918902	0.92031	0.916531	0.945445	0.936564	0.93026	0.901782	0.903022	0.958849	0.936316	0.926705		1531621	0.926407	0.0164956	0.00476188
1541621	109789	110017	49936	38883	41646	28317	54585	26236	32055	82642	27211	29194															1541621	0.921923	0.917818	0.92031	0.915778	0.944696	0.936564	0.929154	0.900683	0.902094	0.959603	0.935182	0.926705		1541621	0.925876	0.0168356	0.00486002
1551621	109724	109919	49904	38883	41646	28349	54618	26236	32055	82577	27244	29162															1551621	0.921377	0.917	0.91972	0.915778	0.944696	0.937622	0.929716	0.900683	0.902094	0.958849	0.936316	0.92569		1551621	0.925795	0.0169014	0.00487902
1561621	109627	109822	49871	38850	41614	28317	54585	26203	32023	82512	27244	29129															1561621	0.920562	0.916191	0.919112	0.915	0.943971	0.936564	0.929154	0.89955	0.901193	0.958094	0.936316	0.924642		1561621	0.925029	0.0170044	0.00490875
1571621	109562	109757	49871	38850	41581	28317	54553	26171	31958	82447	27179	29097															1571621	0.920016	0.915649	0.919112	0.915	0.943222	0.936564	0.928609	0.898452	0.899364	0.957339	0.934083	0.923626		1571621	0.924253	0.017086	0.0049323
1581621	109464	109757	49871	38818	41549	28317	54553	26203	31925	82512	27179	29129															1581621	0.919194	0.915649	0.919112	0.914247	0.942496	0.936564	0.928609	0.89955	0.898435	0.958094	0.934083	0.924642		1581621	0.924223	0.0171842	0.00496065
1591621	109334	109529	49839	38818	41549	28284	54455	26138	31893	82447	27211	29097															1591621	0.918102	0.913747	0.918522	0.914247	0.942496	0.935472	0.926941	0.897319	0.897535	0.957339	0.935182	0.923626		1591621	0.923377	0.0175596	0.00506902
1601621	109334	109464	49806	38818	41581	28284	54488	26106	31893	82480	27179	29097															1601621	0.918102	0.913205	0.917914	0.914247	0.943222	0.935472	0.927503	0.89622	0.897535	0.957722	0.934083	0.923626		1601621	0.923237	0.0178402	0.00515002
1611621	109269	109399	49774	38720	41549	28284	54455	26138	31860	82447	27146	29097															1611621	0.917556	0.912662	0.917324	0.911939	0.942496	0.935472	0.926941	0.897319	0.896606	0.957339	0.932948	0.923626		1611621	0.922686	0.0177758	0.00513144
1621621	109139	109236	49741	38720	41516	28284	54455	26106	31828	82350	27179	29032															1621621	0.916464	0.911302	0.916716	0.911939	0.941748	0.935472	0.926941	0.89622	0.895706	0.956213	0.934083	0.921563		1621621	0.922031	0.0179464	0.00518067
1631621	109041	109171	49741	38785	41516	28252	54390	26106	31763	82317	27114	29064															1631621	0.915642	0.91076	0.916716	0.913469	0.941748	0.934414	0.925835	0.89622	0.893876	0.95583	0.931849	0.922579		1631621	0.921578	0.0178921	0.00516501
1641621	109041	109139	49741	38688	41516	28219	54423	26041	31763	82350	27114	28967															1641621	0.915642	0.910493	0.916716	0.911185	0.941748	0.933322	0.926396	0.893989	0.893876	0.956213	0.931849	0.9195		1641621	0.920911	0.0183162	0.00528742
1651621	108879	108976	49709	38688	41516	28219	54390	26138	31763	82252	27114	28999															1651621	0.914281	0.909133	0.916126	0.911185	0.941748	0.933322	0.925835	0.897319	0.893876	0.955075	0.931849	0.920516		1651621	0.920855	0.0178045	0.00513971
1661621	108846	108911	49644	38655	41484	28252	54325	26041	31698	82285	27146	28999															1661621	0.914004	0.908591	0.914928	0.910408	0.941022	0.934414	0.924728	0.893989	0.892047	0.955458	0.932948	0.920516		1661621	0.920254	0.0186797	0.00539237
1671621	108749	108879	49676	38623	41484	28219	54325	26008	31633	82252	27114	28967															1671621	0.91319	0.908324	0.915518	0.909654	0.941022	0.933322	0.924728	0.892856	0.890218	0.955075	0.931849	0.9195		1671621	0.919605	0.0189362	0.00546641
1681621	108651	108684	49644	38623	41419	28252	54293	25976	31665	82252	27114	28934															1681621	0.912367	0.906697	0.914928	0.909654	0.939547	0.934414	0.924183	0.891757	0.891118	0.955075	0.931849	0.918452		1681621	0.91917	0.0190022	0.00548545
1691621	108586	108586	49611	38590	41419	28284	54293	26008	31600	82187	27081	28902															1691621	0.911821	0.90588	0.91432	0.908877	0.939547	0.935472	0.924183	0.892856	0.889289	0.95432	0.930715	0.917436		1691621	0.918726	0.0191192	0.00551924
1701621	108554	108489	49579	38558	41419	28187	54293	25976	31568	82122	27081	28902															1701621	0.911552	0.905071	0.91373	0.908123	0.939547	0.932264	0.924183	0.891757	0.888389	0.953565	0.930715	0.917436		1701621	0.918028	0.0191237	0.00552054
1711621	108456	108424	49579	38590	41419	28219	54195	25911	31470	82155	27049	28869															1711621	0.910729	0.904528	0.91373	0.908877	0.939547	0.933322	0.922515	0.889526	0.885631	0.953949	0.929615	0.916389		1711621	0.917363	0.0198603	0.00573317
1721621	108294	108359	49514	38525	41419	28219	54195	25976	31535	82090	27016	28869															1721621	0.909369	0.903986	0.912532	0.907346	0.939547	0.933322	0.922515	0.891757	0.88746	0.953194	0.928481	0.916389		1721621	0.917158	0.0193006	0.00557161
1731621	108196	108261	49514	38525	41419	28187	54163	25911	31438	82025	27016	28837															1731621	0.908546	0.903168	0.912532	0.907346	0.939547	0.932264	0.92197	0.889526	0.88473	0.952439	0.928481	0.915373		1731621	0.916327	0.0198245	0.00572284
1741621	108131	108099	49481	38493	41386	28154	54195	25878	31470	82025	27016	28837															1741621	0.908	0.901817	0.911924	0.906592	0.938799	0.931172	0.922515	0.888393	0.885631	0.952439	0.928481	0.915373		1741621	0.915928	0.0198427	0.00572809
1751621	108099	108001	49449	38428	41353	28187	54098	25878	31405	82025	26984	28804															1751621	0.907731	0.900999	0.911334	0.905061	0.93805	0.932264	0.920864	0.888393	0.883801	0.952439	0.927381	0.914326		1751621	0.91522	0.020138	0.00581333
1761621	108001	107936	49481	38428	41353	28154	54098	25846	31340	81992	27016	28804															1761621	0.906908	0.900457	0.911924	0.905061	0.93805	0.931172	0.920864	0.887294	0.881972	0.952056	0.928481	0.914326		1761621	0.914881	0.0205073	0.00591994
1771621	107904	107741	49449	38428	41321	28154	54033	25846	31275	81960	26951	28804															1771621	0.906094	0.89883	0.911334	0.905061	0.937324	0.931172	0.919758	0.887294	0.880143	0.951684	0.926247	0.914326		1771621	0.914106	0.0206293	0.00595516
1781621	107806	107741	49351	38395	41288	28154	54033	25813	31243	81960	26951	28739															1781621	0.905271	0.89883	0.909528	0.904284	0.936576	0.931172	0.919758	0.886162	0.879242	0.951684	0.926247	0.912262		1781621	0.913418	0.0209122	0.00603683
1791621	107643	107611	49351	38297	41288	28154	54033	25748	31275	81895	26951	28739															1791621	0.903902	0.897746	0.909528	0.901976	0.936576	0.931172	0.919758	0.88393	0.880143	0.95093	0.926247	0.912262		1791621	0.912847	0.0211484	0.00610501
1801621	107611	107513	49351	38362	41288	28089	54000	25781	31243	81862	26951	28707															1801621	0.903633	0.896928	0.909528	0.903507	0.936576	0.929023	0.919196	0.885063	0.879242	0.950546	0.926247	0.911247		1801621	0.912561	0.0209005	0.00603346
1811621	107448	107416	49319	38265	41288	28122	53968	25716	31145	81862	26919	28707															1811621	0.902265	0.896119	0.908938	0.901222	0.936576	0.930114	0.918651	0.882832	0.876484	0.950546	0.925147	0.911247		1811621	0.911678	0.0217819	0.0062879
1821621	107481	107318	49254	38265	41288	28056	53903	25716	31145	81797	26919	28707															1821621	0.902542	0.895301	0.907741	0.901222	0.936576	0.927931	0.917545	0.882832	0.876484	0.949792	0.925147	0.911247		1821621	0.911197	0.0215261	0.00621406
1831621	107351	107221	49254	38265	41223	28122	53903	25683	31113	81765	26919	28674															1831621	0.90145	0.894492	0.907741	0.901222	0.935101	0.930114	0.917545	0.881699	0.875584	0.94942	0.925147	0.910199		1831621	0.910809	0.021843	0.00630553
1841621	107188	107123	49221	38232	41223	28122	53870	25683	31113	81765	26854	28674															1841621	0.900081	0.893675	0.907132	0.900445	0.935101	0.930114	0.916983	0.881699	0.875584	0.94942	0.922913	0.910199		1841621	0.910279	0.0218529	0.00630839
1851621	107123	107026	49189	38232	41223	28089	53838	25683	31048	81732	26821	28674															1851621	0.899536	0.892865	0.906543	0.900445	0.935101	0.929023	0.916438	0.881699	0.873755	0.949037	0.921779	0.910199		1851621	0.909702	0.0219835	0.00634608
1861621	107091	106961	49156	38200	41223	28056	53805	25651	30982	81700	26886	28609															1861621	0.899267	0.892323	0.905934	0.899691	0.935101	0.927931	0.915877	0.8806	0.871897	0.948665	0.924013	0.908136		1861621	0.90912	0.0224384	0.00647741
1871621	107026	106798	49124	38167	41191	28024	53740	25651	30950	81602	26854	28609															1871621	0.898721	0.890963	0.905345	0.898914	0.934375	0.926873	0.91477	0.8806	0.870997	0.947527	0.922913	0.908136		1871621	0.908345	0.0222935	0.00643559
1881621	106896	106733	49091	38167	41158	28024	53740	25618	30950	81635	26821	28577															1881621	0.897629	0.890421	0.904736	0.898914	0.933627	0.926873	0.91477	0.879467	0.870997	0.94791	0.921779	0.90712		1881621	0.907854	0.0224319	0.00647553
1891621	106766	106603	49091	38070	41158	28024	53740	25586	30885	81570	26821	28609															1891621	0.896538	0.889337	0.904736	0.89663	0.933627	0.926873	0.91477	0.878369	0.869168	0.947156	0.921779	0.908136		1891621	0.90726	0.0229244	0.00661772
1901621	106701	106571	49026	38070	41158	28024	53643	25553	30852	81537	26789	28512															1901621	0.895992	0.88907	0.903539	0.89663	0.933627	0.926873	0.913119	0.877236	0.868239	0.946773	0.920679	0.905057		1901621	0.906403	0.0230816	0.00666308
1911621	106636	106408	48994	38005	41126	27991	53643	25553	30820	81537	26756	28544															1911621	0.895446	0.88771	0.902949	0.895099	0.932901	0.925781	0.913119	0.877236	0.867338	0.946773	0.919545	0.906072		1911621	0.905831	0.0231739	0.00668973
1921621	106441	106376	48994	38037	41126	27959	53643	25521	30755	81472	26789	28512															1921621	0.893809	0.887443	0.902949	0.895852	0.932901	0.924723	0.913119	0.876137	0.865509	0.946018	0.920679	0.905057		1921621	0.90535	0.0234989	0.00678355
1931621	106408	106180	48961	38037	41061	27991	53643	25521	30787	81440	26724	28512															1931621	0.893532	0.885808	0.902341	0.895852	0.931426	0.925781	0.913119	0.876137	0.86641	0.945646	0.918445	0.905057		1931621	0.904963	0.0232416	0.00670928
1941621	106343	106083	48929	38005	41061	27959	53545	25488	30690	81440	26756	28447															1941621	0.892986	0.884998	0.901751	0.895099	0.931426	0.924723	0.911451	0.875004	0.86368	0.945646	0.919545	0.902993		1941621	0.904109	0.0238313	0.00687949
1951621	106213	106050	48929	37940	41061	27991	53545	25456	30657	81375	26724	28447															1951621	0.891894	0.884723	0.901751	0.893568	0.931426	0.925781	0.911451	0.873906	0.862751	0.944891	0.918445	0.902993		1951621	0.903632	0.0241237	0.00696391
1961621	106115	105888	48864	37907	41028	27959	53545	25423	30625	81342	26691	28414															1961621	0.891071	0.883372	0.900553	0.892791	0.930678	0.924723	0.911451	0.872773	0.861851	0.944508	0.917311	0.901946		1961621	0.902752	0.0242754	0.00700769
1971621	106018	105758	48831	37842	40996	27959	53480	25423	30592	81375	26691	28414															1971621	0.890257	0.882287	0.899945	0.89126	0.929952	0.924723	0.910344	0.872773	0.860922	0.944891	0.917311	0.901946		1971621	0.902218	0.0245478	0.00708633
1981621	105888	105693	48799	37842	40996	27926	53415	25423	30527	81212	26724	28414															1981621	0.889165	0.881745	0.899355	0.89126	0.929952	0.923632	0.909238	0.872773	0.859093	0.942999	0.918445	0.901946		1981621	0.901633	0.0245764	0.00709458
1991621	105823	105628	48799	37842	40996	27926	53415	25391	30495	81244	26659	28382															1991621	0.888619	0.881203	0.899355	0.89126	0.929952	0.923632	0.909238	0.871674	0.858192	0.94337	0.916211	0.90093		1991621	0.901136	0.0248266	0.00716683
2001621	105758	105530	48733	37810	40963	27894	53415	25326	30462	81212	26626	28349															2001621	0.888073	0.880385	0.898139	0.890506	0.929203	0.922573	0.909238	0.869443	0.857263	0.942999	0.915077	0.899883		2001621	0.900232	0.0250528	0.00723211

## Sheet: Fig3B timida
				Original data (arbitrary units)												Maxima											Normalized to maximum									Averaged data (shown in Fig. 3B)
Time (ms)	E timida 1	E timida 2	E timida 3	E timida 4	E timida 5	E timida 6	E timida 7	E timida 8	E timida 9	E timida 10		max1	max2	max3	max4	max5	max6	max7	max8	max9	max10		Time (ms)	E timida 1	E timida 2	E timida 3	E timida 4	E timida 5	E timida 6	E timida 7	E timida 8	E timida 9	E timida 10		Time (ms)	Average	stdev	SE	n
11	260	260	260	260	260	260	260	260	227	227		58753	101324	73434	50492.2	73977.8	74527.2	50058.6	56454.2	65479.8	75403.5		11	0.00442531	0.00256603	0.00354059	0.00514931	0.00351457	0.00348866	0.00519392	0.0046055	0.00346672	0.00301047		11	0.00389611	0.000895291	0.000283116	10
21	19116	29747	26268	20254	25976	26073	19669	21034	19669	21912													21	0.325362	0.293584	0.357709	0.401131	0.351132	0.349845	0.39292	0.372585	0.300383	0.290597		21	0.343525	0.039984	0.012644
31	20091	31438	27666	21197	27504	27504	20611	22074	20644	23082													31	0.341957	0.310273	0.376746	0.419807	0.371787	0.369047	0.411738	0.391007	0.315273	0.306113		31	0.361375	0.0413657	0.013081
41	20481	32283	28317	21652	28219	28252	21002	22497	21132	23602													41	0.348595	0.318612	0.385612	0.428818	0.381452	0.379083	0.419549	0.3985	0.322725	0.313009		41	0.369596	0.041852	0.0132348
51	20872	33031	28804	21977	28902	28837	21392	22855	21489	24090													51	0.35525	0.325994	0.392243	0.435255	0.390685	0.386933	0.427339	0.404841	0.328177	0.319481		51	0.37662	0.0421457	0.0133276
61	21229	33746	29324	22270	29585	29422	21749	23212	21814	24578													61	0.361327	0.333051	0.399325	0.441058	0.399917	0.394782	0.434471	0.411165	0.333141	0.325953		61	0.383419	0.0424368	0.0134197
71	21522	34494	29845	22562	30235	30040	22074	23505	22205	25033													71	0.366314	0.340433	0.406419	0.446841	0.408704	0.403074	0.440963	0.416355	0.339112	0.331987		71	0.39002	0.0425389	0.013452
81	21944	35274	30365	22887	30950	30690	22400	23895	22562	25521													81	0.373496	0.348131	0.413501	0.453278	0.418369	0.411796	0.447476	0.423263	0.344564	0.338459		81	0.397233	0.0427773	0.0135274
91	22270	36054	30917	23212	31633	31275	22757	24188	22952	26008													91	0.379045	0.355829	0.421018	0.459714	0.427601	0.419645	0.454607	0.428453	0.35052	0.344918		91	0.404135	0.0430094	0.0136008
101	22562	36932	31438	23537	32283	31860	23115	24545	23342	26496													101	0.384015	0.364495	0.428112	0.466151	0.436388	0.427495	0.461759	0.434777	0.356476	0.35139		101	0.411106	0.0432177	0.0136666
111	22952	37712	31990	23798	32966	32511	23472	24903	23765	27049													111	0.390653	0.372193	0.435629	0.47132	0.44562	0.43623	0.468891	0.441118	0.362936	0.358724		111	0.418331	0.0431588	0.013648
121	23375	38590	32511	24123	33681	33161	23798	25261	24155	27536													121	0.397852	0.380858	0.442724	0.477757	0.455285	0.444952	0.475403	0.44746	0.368892	0.365182		121	0.425637	0.0432888	0.0136891
131	23733	39435	33063	24448	34364	33746	24155	25651	24545	28089													131	0.403946	0.389198	0.450241	0.484193	0.464518	0.452801	0.482535	0.454368	0.374848	0.372516		131	0.432916	0.0434823	0.0137503
141	24123	40313	33583	24740	35046	34396	24480	25943	25033	28642													141	0.410584	0.397863	0.457322	0.489976	0.473737	0.461523	0.489027	0.45954	0.382301	0.37985		141	0.440172	0.0431693	0.0136513
151	24480	41191	34136	25065	35762	34981	24870	26333	25456	29194													151	0.41666	0.406528	0.464853	0.496413	0.483415	0.469372	0.496818	0.466449	0.388761	0.38717		151	0.447644	0.0434264	0.0137326
161	24903	42069	34689	25391	36379	35567	25228	26724	25911	29780													161	0.42386	0.415194	0.472383	0.502869	0.491756	0.477235	0.50397	0.473375	0.39571	0.394942		161	0.455129	0.0432706	0.0136834
171	25261	42947	35209	25716	37095	36217	25553	27114	26268	30267													171	0.429953	0.423859	0.479465	0.509306	0.501434	0.485957	0.510462	0.480283	0.401162	0.401401		171	0.462328	0.0437276	0.0138279
181	25651	43857	35729	26008	37745	36867	25911	27471	26724	30820													181	0.436591	0.43284	0.486546	0.515089	0.510221	0.494679	0.517614	0.486607	0.408126	0.408734		181	0.469705	0.0436583	0.013806
191	26073	44702	36282	26366	38428	37485	26268	27829	27179	31438													191	0.443773	0.44118	0.494076	0.522179	0.519453	0.502971	0.524745	0.492948	0.415075	0.41693		191	0.477333	0.0436814	0.0138133
201	26431	45547	36802	26659	39078	38037	26594	28154	27634	31958													201	0.449867	0.449519	0.501158	0.527982	0.528239	0.510377	0.531258	0.498705	0.422023	0.423827		201	0.484295	0.043648	0.0138027
211	26821	46458	37322	26951	39695	38655	26951	28544	28056	32576													211	0.456505	0.45851	0.508239	0.533765	0.53658	0.51867	0.538389	0.505613	0.428468	0.432023		211	0.491676	0.0435354	0.0137671
221	27244	47303	37907	27276	40346	39175	27276	28902	28512	33128													221	0.463704	0.46685	0.516205	0.540202	0.54538	0.525647	0.544882	0.511954	0.435432	0.439343		221	0.49896	0.0434702	0.0137465
231	27569	48148	38395	27569	40931	39825	27601	29259	28934	33648													231	0.469236	0.475189	0.52285	0.546005	0.553288	0.534369	0.551374	0.518278	0.441877	0.446239		231	0.505871	0.0436127	0.0137916
241	27926	49026	38948	27861	41549	40378	27894	29617	29389	34169													241	0.475312	0.483855	0.530381	0.551788	0.561641	0.541789	0.557227	0.52462	0.448825	0.453149		241	0.512859	0.0435413	0.013769
251	28317	49839	39435	28154	42166	40898	28284	29975	29845	34754													251	0.481967	0.491878	0.537013	0.557591	0.569982	0.548766	0.565018	0.530961	0.455789	0.460907		251	0.519987	0.0434961	0.0137547
261	28707	50652	39923	28512	42719	41484	28577	30332	30267	35274													261	0.488605	0.499902	0.543658	0.564681	0.577457	0.556629	0.570871	0.537285	0.462234	0.467803		261	0.526913	0.0435365	0.0137674
271	29129	51464	40411	28772	43272	42004	28902	30657	30722	35794													271	0.495788	0.507916	0.550304	0.56983	0.584932	0.563606	0.577364	0.543042	0.469183	0.4747		271	0.533666	0.0432559	0.0136787
281	29487	52277	40898	29064	43857	42556	29259	31015	31178	36347													281	0.501881	0.51594	0.556935	0.575613	0.59284	0.571013	0.584495	0.549383	0.476147	0.482033		281	0.540628	0.0432592	0.0136797
291	29877	53057	41353	29324	44410	43044	29519	31373	31600	36899													291	0.508519	0.523638	0.563132	0.580763	0.600315	0.577561	0.589689	0.555724	0.482592	0.489354		291	0.547129	0.0429121	0.01357
301	30202	53838	41841	29585	44930	43564	29812	31698	31990	37387													301	0.514051	0.531346	0.569777	0.585932	0.607344	0.584538	0.595542	0.561481	0.488548	0.495826		301	0.553439	0.0429505	0.0135821
311	30560	54585	42296	29910	45450	44052	30105	32055	32478	37875													311	0.520144	0.538718	0.575973	0.592368	0.614373	0.591086	0.601396	0.567805	0.496	0.502298		311	0.560016	0.0427747	0.0135266
321	30950	55333	42751	30137	45970	44572	30430	32380	32868	38428													321	0.526782	0.546101	0.582169	0.596864	0.621403	0.598064	0.607888	0.573562	0.501956	0.509632		321	0.566442	0.042602	0.0134719
331	31308	56016	43174	30397	46393	45060	30657	32673	33258	38883													331	0.532875	0.552841	0.587929	0.602013	0.62712	0.604612	0.612423	0.578752	0.507912	0.515666		331	0.572214	0.0423136	0.0133807
341	31633	56699	43629	30690	46913	45547	30982	33063	33681	39338													341	0.538407	0.559582	0.594125	0.607816	0.63415	0.611146	0.618915	0.58566	0.514372	0.5217		341	0.578587	0.042498	0.0134391
351	31958	57446	44019	30917	47368	45970	31243	33356	34104	39858													351	0.543939	0.566955	0.599436	0.612312	0.6403	0.616822	0.624129	0.59085	0.520832	0.528596		351	0.584417	0.0420285	0.0132906
361	32283	58097	44475	31178	47823	46425	31503	33648	34494	40378													361	0.54947	0.57338	0.605646	0.617481	0.646451	0.622927	0.629323	0.596023	0.526788	0.535493		361	0.590298	0.0418173	0.0132238
371	32641	58779	44897	31438	48246	46880	31763	33941	34884	40833													371	0.555564	0.58011	0.611393	0.62263	0.652169	0.629032	0.634517	0.601213	0.532744	0.541527		371	0.59609	0.0415785	0.0131483
381	32998	59430	45352	31698	48733	47303	31990	34234	35274	41256													381	0.56164	0.586535	0.617589	0.62778	0.658752	0.634708	0.639051	0.606403	0.5387	0.547137		381	0.601829	0.0414662	0.0131127
391	33291	60080	45710	31958	49156	47726	32315	34559	35664	41711													391	0.566627	0.59295	0.622464	0.632929	0.66447	0.640384	0.645544	0.61216	0.544656	0.553171		391	0.607535	0.0414323	0.013102
401	33583	60698	46068	32218	49546	48116	32511	34884	36054	42134													401	0.571597	0.59905	0.627339	0.638078	0.669741	0.645617	0.649459	0.617916	0.550612	0.558781		401	0.612819	0.0411121	0.0130008
411	33908	61283	46458	32445	49936	48538	32771	35111	36379	42621													411	0.577128	0.604823	0.63265	0.642574	0.675013	0.651279	0.654653	0.621937	0.555576	0.565239		411	0.618087	0.0409064	0.0129357
421	34201	61900	46848	32641	50327	48929	33063	35436	36802	42979													421	0.582115	0.610913	0.637961	0.646456	0.680299	0.656525	0.660486	0.627694	0.562036	0.569987		421	0.623447	0.0407581	0.0128888
431	34494	62453	47205	32901	50717	49319	33258	35664	37095	43402													431	0.587102	0.61637	0.642822	0.651605	0.68557	0.661758	0.664382	0.631733	0.566511	0.575597		431	0.628345	0.0406915	0.0128678
441	34786	63038	47531	33128	51074	49709	33486	35957	37517	43857													441	0.592072	0.622144	0.647261	0.656101	0.690396	0.666991	0.668936	0.636923	0.572955	0.581631		441	0.633541	0.040177	0.0127051
451	35111	63591	47921	33323	51464	50099	33681	36249	37907	44247													451	0.597604	0.627602	0.652572	0.659963	0.695668	0.672224	0.672832	0.642095	0.578911	0.586803		451	0.638628	0.0398194	0.012592
461	35339	64144	48278	33551	51790	50424	33941	36477	38200	44637													461	0.601485	0.633059	0.657434	0.664478	0.700075	0.676585	0.678026	0.646134	0.583386	0.591975		461	0.643264	0.0398201	0.0125922
471	35697	64631	48571	33778	52147	50782	34136	36737	38590	44995													471	0.607578	0.637866	0.661424	0.668974	0.704901	0.681389	0.681921	0.650739	0.589342	0.596723		471	0.648086	0.0393523	0.0124443
481	35957	65184	48929	33973	52472	51139	34364	36997	38850	45417													481	0.612003	0.643324	0.666299	0.672836	0.709294	0.686179	0.686476	0.655345	0.593313	0.60232		481	0.652739	0.0392585	0.0124146
491	36217	65704	49286	34169	52797	51497	34591	37225	39240	45808													491	0.616429	0.648456	0.67116	0.676718	0.713687	0.690983	0.691011	0.659384	0.599269	0.607505		491	0.65746	0.0389009	0.0123015
501	36477	66224	49579	34331	53057	51790	34721	37517	39533	46165													501	0.620854	0.653588	0.67515	0.679926	0.717202	0.694914	0.693607	0.664556	0.603743	0.61224		501	0.661578	0.0383874	0.0121392
511	36737	66680	49871	34624	53448	52147	34949	37777	39923	46523													511	0.625279	0.658088	0.679127	0.685729	0.722487	0.699704	0.698162	0.669161	0.609699	0.616987		511	0.666443	0.0383312	0.0121214
521	36997	67135	50196	34754	53773	52472	35176	37972	40216	46880													521	0.629705	0.662579	0.683553	0.688304	0.72688	0.704065	0.702697	0.672616	0.614174	0.621722		521	0.670629	0.03817	0.0120704
531	37290	67622	50457	34981	54033	52765	35339	38232	40508	47270													531	0.634692	0.667385	0.687107	0.6928	0.730395	0.707997	0.705953	0.677221	0.618633	0.626894		531	0.674908	0.0376502	0.011906
541	37517	68078	50749	35144	54325	53122	35534	38428	40833	47596													541	0.638555	0.671886	0.691083	0.696028	0.734342	0.712787	0.709848	0.680693	0.623597	0.631218		541	0.679004	0.0374667	0.011848
551	37777	68533	51107	35306	54618	53383	35697	38623	41126	47921													551	0.64298	0.676376	0.695958	0.699236	0.738302	0.716289	0.713105	0.684147	0.628071	0.635528		551	0.682999	0.0371511	0.0117482
561	37940	68923	51334	35502	54878	53643	35892	38850	41353	48278													561	0.645755	0.680225	0.699049	0.703118	0.741817	0.719778	0.717	0.688168	0.631538	0.640262		561	0.686671	0.0371065	0.0117341
571	38232	69378	51627	35664	55138	53968	36087	39078	41744	48603													571	0.650725	0.684716	0.703039	0.706326	0.745332	0.724138	0.720896	0.692207	0.637509	0.644572		571	0.690946	0.0365201	0.0115487
581	38460	69801	51920	35892	55398	54260	36282	39273	41971	48896													581	0.654605	0.68889	0.707029	0.710842	0.748846	0.728056	0.724791	0.695661	0.640976	0.648458		581	0.694816	0.0365592	0.011561
591	38720	70223	52212	36054	55658	54520	36444	39468	42296	49254													591	0.659031	0.693055	0.711006	0.71405	0.752361	0.731545	0.728027	0.699115	0.64594	0.653206		591	0.698734	0.0360007	0.0113844
601	38948	70613	52440	36217	55951	54781	36607	39728	42556	49514													601	0.662911	0.696904	0.714111	0.717279	0.756321	0.735047	0.731283	0.70372	0.64991	0.656654		601	0.702414	0.0359093	0.0113555
611	39143	71004	52700	36379	56211	55041	36737	39923	42784	49806													611	0.66623	0.700763	0.717651	0.720487	0.759836	0.738536	0.73388	0.707175	0.653392	0.660527		611	0.705848	0.0357855	0.0113164
1021	45612	81797	60047	41288	62876	62453	41484	45645	50879	58617													1021	0.776335	0.807283	0.8177	0.81771	0.849931	0.837989	0.828709	0.808531	0.777018	0.777378		1021	0.809858	0.0261221	0.00826053
1121	46750	83618	61250	42069	63916	63624	42199	46653	52180	60080													1121	0.795705	0.825255	0.834082	0.833178	0.863989	0.853702	0.842992	0.826386	0.796887	0.79678		1121	0.826896	0.0241016	0.0076216
1221	47726	85113	62291	42849	64859	64696	42816	47498	53415	61315													1221	0.812317	0.84001	0.848258	0.848625	0.876736	0.868086	0.855318	0.841354	0.815748	0.813159		1221	0.841961	0.0224943	0.00711333
1321	48603	86446	63266	43467	65607	65574	43467	48278	54520	62388													1321	0.827244	0.853166	0.861536	0.860865	0.886847	0.879867	0.868323	0.855171	0.832623	0.827389		1321	0.855303	0.0208785	0.00660235
1421	49384	87552	64046	43987	66289	66354	43954	48929	55398	63428													1421	0.840536	0.864081	0.872157	0.871164	0.896066	0.890333	0.878051	0.866702	0.846032	0.841181		1421	0.86663	0.0193481	0.00611841
1521	50001	88624	64794	44540	66907	67037	44475	49449	56179	64306													1521	0.851038	0.874661	0.882343	0.882116	0.90442	0.899497	0.888459	0.875913	0.857959	0.852825		1521	0.876923	0.018474	0.00584198
1621	50619	89535	65477	44995	67460	67655	44865	49969	56959	65087													1621	0.861557	0.883652	0.891644	0.891127	0.911895	0.907789	0.89625	0.885124	0.869871	0.863183		1621	0.886209	0.0172968	0.00546973
1721	51204	90315	66062	45417	67882	68175	45222	50424	57642	65802													1721	0.871514	0.89135	0.899611	0.899485	0.917599	0.914767	0.903382	0.893184	0.880302	0.872665		1721	0.894386	0.0159597	0.00504691
1821	51692	91063	66582	45775	68370	68728	45547	50879	58259	66419													1821	0.87982	0.898732	0.906692	0.906575	0.924196	0.922187	0.909874	0.901243	0.889725	0.880848		1821	0.901989	0.0152986	0.00483785
1921	52180	91746	67037	46133	68760	69118	45873	51302	58747	67005													1921	0.888126	0.905473	0.912888	0.913665	0.929468	0.92742	0.916387	0.908736	0.897177	0.88862		1921	0.908796	0.0143474	0.00453706
2021	52570	92331	67492	46393	69150	69541	46165	51594	59235	67525													2021	0.894764	0.911247	0.919084	0.918814	0.93474	0.933096	0.92222	0.913908	0.90463	0.895516		2021	0.914802	0.0137923	0.00436149
2121	52992	92916	67947	46718	69443	69931	46360	51887	59690	68045													2121	0.901946	0.91702	0.92528	0.925251	0.9387	0.938329	0.926115	0.919098	0.911579	0.902412		2121	0.920573	0.0128716	0.00407035
2221	53318	93436	68273	46945	69801	70256	46653	52212	60112	68435													2221	0.907495	0.922152	0.929719	0.929747	0.94354	0.94269	0.931968	0.924855	0.918023	0.907584		2221	0.925777	0.0125189	0.00395882
2321	53643	93859	68598	47140	69996	70548	46913	52505	60437	68890													2321	0.913026	0.926327	0.934145	0.933609	0.946176	0.946608	0.937162	0.930045	0.922987	0.913618		2321	0.93037	0.0117224	0.00370694
2421	53903	94314	68890	47433	70288	70841	47075	52700	60795	69248													2421	0.917452	0.930818	0.938121	0.939412	0.950123	0.950539	0.940398	0.933499	0.928454	0.918366		2421	0.934718	0.0114257	0.00361314
2521	54195	94704	69183	47596	70483	71101	47270	52927	61088	69638													2521	0.922422	0.934667	0.942111	0.94264	0.952759	0.954028	0.944294	0.93752	0.932929	0.923538		2521	0.938691	0.0107334	0.00339421
2621	54488	95029	69410	47758	70743	71361	47368	53188	61380	69898													2621	0.927409	0.937874	0.945202	0.945848	0.956273	0.957516	0.946252	0.942144	0.937388	0.926986		2621	0.942289	0.0103463	0.00327178
2721	54716	95419	69703	47921	70906	71524	47563	53350	61673	70223													2721	0.931289	0.941723	0.949192	0.949077	0.958477	0.959703	0.950147	0.945013	0.941863	0.931297		2721	0.945778	0.0097113	0.00307098
2821	54943	95744	69898	48051	71069	71719	47693	53545	61835	70483													2821	0.935153	0.944931	0.951848	0.951651	0.96068	0.96232	0.952744	0.948467	0.944337	0.934745		2821	0.948688	0.00928297	0.00293553
2921	55138	95939	70126	48246	71264	71914	47856	53610	62096	70808													2921	0.938472	0.946855	0.954953	0.955513	0.963316	0.964936	0.956	0.949619	0.948323	0.939055		2921	0.951704	0.00899278	0.00284377
3021	55268	96232	70256	48343	71426	72076	47986	53805	62323	71004													3021	0.940685	0.949747	0.956723	0.957434	0.965506	0.96711	0.958597	0.953073	0.95179	0.941654		3021	0.954232	0.00880411	0.00278411
3121	55528	96557	70516	48441	71524	72271	48116	54000	62453	71231													3121	0.94511	0.952955	0.960264	0.959375	0.96683	0.969727	0.961194	0.956527	0.953775	0.944665		3121	0.957042	0.0082529	0.0026098
3221	55658	96785	70646	48603	71719	72467	48181	54130	62648	71426													3221	0.947323	0.955205	0.962034	0.962584	0.969466	0.972357	0.962493	0.95883	0.956753	0.947251		3221	0.959429	0.00826122	0.00261243
3321	55821	97045	70743	48668	71816	72564	48278	54260	62843	71654													3321	0.950097	0.957771	0.963355	0.963871	0.970778	0.973658	0.96443	0.961132	0.959731	0.950274		3321	0.96151	0.00763582	0.00241466
3421	55918	97240	71004	48831	71946	72662	48376	54325	63006	71849													3421	0.951748	0.959695	0.966909	0.967099	0.972535	0.974973	0.966388	0.962284	0.96222	0.952861		3421	0.963671	0.00756294	0.00239161
3521	56179	97435	71069	48896	72044	72759	48473	54455	63168	72044													3521	0.95619	0.96162	0.967794	0.968386	0.97386	0.976275	0.968326	0.964587	0.964694	0.955447		3521	0.965718	0.00676065	0.00213791
3621	56276	97630	71166	48961	72141	72922	48571	54553	63266	72174													3621	0.957841	0.963545	0.969115	0.969674	0.975171	0.978462	0.970283	0.966322	0.966191	0.957171		3621	0.967377	0.00677137	0.00214129
3721	56374	97793	71329	49091	72239	72987	48668	54716	63428	72304													3721	0.959509	0.965153	0.971335	0.972248	0.976496	0.979334	0.972221	0.96921	0.968665	0.958895		3721	0.969307	0.00662952	0.00209644
3821	56536	97988	71426	49124	72336	73084	48733	54716	63526	72467													3821	0.962267	0.967078	0.972656	0.972902	0.977807	0.980635	0.97352	0.96921	0.970162	0.961056		3821	0.970729	0.00619664	0.00195955
3921	56601	98150	71589	49286	72402	73182	48799	54846	63656	72662													3921	0.963373	0.968677	0.974875	0.97611	0.978699	0.98195	0.974838	0.971513	0.972147	0.963643		3921	0.972582	0.00604877	0.00191279
4021	56731	98248	71654	49286	72564	73247	48864	54976	63754	72824													4021	0.965586	0.969644	0.975761	0.97611	0.980889	0.982823	0.976137	0.973815	0.973644	0.965791		4021	0.97402	0.00572261	0.00180965
4121	56861	98345	71751	49351	72597	73377	48929	55008	63884	72824													4121	0.967798	0.970601	0.977081	0.977398	0.981335	0.984567	0.977435	0.974382	0.975629	0.965791		4121	0.975202	0.00581242	0.00183805
4221	56861	98540	71849	49449	72662	73474	48961	55073	63916	73052													4221	0.967798	0.972526	0.978416	0.979339	0.982213	0.985868	0.978074	0.975533	0.976118	0.968815		4221	0.97647	0.00563983	0.00178347
4321	57024	98703	71881	49449	72727	73507	49059	55138	64046	73182													4321	0.970573	0.974134	0.978852	0.979339	0.983092	0.986311	0.980032	0.976685	0.978103	0.970539		4321	0.977766	0.00504011	0.00159382
4421	57089	98735	72011	49579	72824	73572	49059	55171	64046	73182													4421	0.971679	0.97445	0.980622	0.981913	0.984403	0.987183	0.980032	0.977269	0.978103	0.970539		4421	0.978619	0.00533947	0.00168849
4521	57154	98898	72076	49579	72889	73637	49124	55301	64209	73344													4521	0.972785	0.976059	0.981507	0.981913	0.985282	0.988055	0.98133	0.979572	0.980592	0.972687		4521	0.979978	0.0049675	0.00157086
4621	57251	98996	72141	49644	72954	73702	49189	55333	64274	73442													4621	0.974436	0.977026	0.982392	0.983201	0.986161	0.988928	0.982629	0.980139	0.981585	0.973987		4621	0.981048	0.0048078	0.00152036
4721	57316	99158	72239	49644	72987	73734	49221	55398	64339	73507													4721	0.975542	0.978625	0.983727	0.983201	0.986607	0.989357	0.983268	0.98129	0.982578	0.974849		4721	0.981904	0.00455038	0.00143896
4821	57414	99256	72271	49709	73052	73799	49221	55431	64371	73604													4821	0.97721	0.979592	0.984163	0.984488	0.987485	0.990229	0.983268	0.981875	0.983066	0.976135		4821	0.982751	0.00433236	0.00137001
4921	57446	99321	72369	49806	73084	73799	49319	55496	64469	73702													4921	0.977755	0.980234	0.985497	0.986409	0.987918	0.990229	0.985226	0.983026	0.984563	0.977435		4921	0.983829	0.00422896	0.00133731
5021	57479	99418	72369	49806	73182	73864	49319	55561	64501	73734													5021	0.978317	0.981191	0.985497	0.986409	0.989243	0.991101	0.985226	0.984178	0.985052	0.977859		5021	0.984407	0.00427964	0.00135334
5121	57576	99483	72434	49839	73214	73897	49351	55626	64566	73799													5121	0.979968	0.981832	0.986382	0.987063	0.989675	0.991544	0.985865	0.985329	0.986044	0.978721		5121	0.985242	0.00404124	0.00127795
5221	57609	99613	72499	49871	73214	73995	49449	55691	64566	73930													5221	0.980529	0.983115	0.987267	0.987696	0.989675	0.992859	0.987823	0.98648	0.986044	0.980459		5221	0.986195	0.00390394	0.00123453
5321	57642	99743	72564	49904	73279	74060	49449	55691	64696	74027													5321	0.981091	0.984398	0.988153	0.98835	0.990554	0.993731	0.987823	0.98648	0.98803	0.981745		5321	0.987036	0.00383523	0.00121281
5421	57739	99743	72597	49936	73312	74060	49481	55691	64664	74060													5421	0.982742	0.984398	0.988602	0.988984	0.991	0.993731	0.988462	0.98648	0.987541	0.982183		5421	0.987412	0.00360421	0.00113975
5521	57804	99808	72662	49936	73344	74092	49481	55723	64729	74125													5521	0.983848	0.98504	0.989487	0.988984	0.991432	0.994161	0.988462	0.987047	0.988534	0.983045		5521	0.988004	0.00341356	0.00107946
5621	57837	99906	72662	50001	73377	74092	49514	55788	64794	74190													5621	0.98441	0.986007	0.989487	0.990271	0.991879	0.994161	0.989121	0.988199	0.989526	0.983907		5621	0.988697	0.00321022	0.00101516
5721	57869	99938	72727	50034	73409	74157	49579	55821	64891	74222													5721	0.984955	0.986323	0.990372	0.990925	0.992311	0.995033	0.99042	0.988783	0.991008	0.984331		5721	0.989446	0.00337272	0.00106655
5821	57869	100003	72727	50066	73474	74157	49579	55853	64891	74255													5821	0.984955	0.986964	0.990372	0.991558	0.99319	0.995033	0.99042	0.98935	0.991008	0.984769		5821	0.989762	0.00335246	0.00106014
5921	57934	100068	72792	50066	73474	74222	49579	55886	64956	74320													5921	0.986061	0.987606	0.991257	0.991558	0.99319	0.995905	0.99042	0.989935	0.992	0.985631		5921	0.990356	0.00320243	0.0010127
6021	58032	100133	72857	50131	73539	74222	49644	55918	64956	74417													6021	0.987729	0.988247	0.992143	0.992846	0.994068	0.995905	0.991718	0.990501	0.992	0.986917		6021	0.991208	0.00287641	0.0009096
6121	58064	100263	72857	50131	73539	74255	49676	55886	64989	74450													6121	0.988274	0.989531	0.992143	0.992846	0.994068	0.996348	0.992358	0.989935	0.992504	0.987355		6121	0.991536	0.00274816	0.000869046
6221	58097	100198	72889	50164	73572	74287	49644	55983	64989	74515													6221	0.988835	0.988889	0.992578	0.993499	0.994514	0.996777	0.991718	0.991653	0.992504	0.988217		6221	0.991919	0.00271043	0.000857112
6321	58064	100328	72889	50131	73604	74320	49709	56016	65022	74515													6321	0.988274	0.990172	0.992578	0.992846	0.994947	0.99722	0.993017	0.992237	0.993008	0.988217		6321	0.992252	0.00278874	0.000881875
6421	58097	100361	72954	50164	73669	74320	49709	55951	65087	74547													6421	0.988835	0.990498	0.993464	0.993499	0.995826	0.99722	0.993017	0.991086	0.994001	0.988641		6421	0.992609	0.0028283	0.000894386
6521	58194	100328	73019	50196	73669	74287	49741	56048	65087	74580													6521	0.990486	0.990172	0.994349	0.994133	0.995826	0.996777	0.993656	0.992804	0.994001	0.989079		6521	0.993128	0.00250221	0.000791267
6621	58194	100361	72987	50196	73702	74352	49741	56048	65152	74645													6621	0.990486	0.990498	0.993913	0.994133	0.996272	0.997649	0.993656	0.992804	0.994994	0.989941		6621	0.993435	0.00255884	0.000809176
6721	58227	100491	73019	50229	73669	74385	49774	56016	65119	74710													6721	0.991048	0.991781	0.994349	0.994787	0.995826	0.998092	0.994315	0.992237	0.99449	0.990803		6721	0.993773	0.00229994	0.000727304
6821	58227	100524	73052	50229	73734	74385	49774	56113	65152	74775													6821	0.991048	0.992106	0.994798	0.994787	0.996704	0.998092	0.994315	0.993955	0.994994	0.991665		6821	0.994247	0.00219965	0.000695592
6921	58259	100556	73117	50262	73702	74352	49806	56179	65184	74742													6921	0.991593	0.992422	0.995683	0.99544	0.996272	0.997649	0.994954	0.995125	0.995482	0.991228		6921	0.994585	0.00211632	0.00066924
7021	58292	100589	73084	50262	73702	74417	49806	56179	65217	74807													7021	0.992154	0.992748	0.995234	0.99544	0.996272	0.998521	0.994954	0.995125	0.995986	0.99209		7021	0.994852	0.00201879	0.000638396
7121	58292	100654	73084	50262	73734	74385	49774	56179	65249	74807													7121	0.992154	0.993389	0.995234	0.99544	0.996704	0.998092	0.994315	0.995125	0.996475	0.99209		7121	0.994902	0.0019562	0.000618603
7221	58357	100686	73149	50327	73799	74417	49839	56146	65217	74872													7221	0.993261	0.993705	0.996119	0.996727	0.997583	0.998521	0.995614	0.99454	0.995986	0.992952		7221	0.995501	0.00186365	0.000589338
7321	58357	100719	73149	50294	73767	74450	49871	56211	65282	74905													7321	0.993261	0.994031	0.996119	0.996074	0.99715	0.998964	0.996253	0.995691	0.996979	0.993389		7321	0.995791	0.00179532	0.000567731
7421	58389	100751	73182	50359	73799	74482	49871	56211	65249	74937													7421	0.993805	0.994347	0.996568	0.997361	0.997583	0.999394	0.996253	0.995691	0.996475	0.993814		7421	0.996129	0.00178719	0.00056516
7521	58389	100751	73182	50294	73799	74450	49871	56244	65249	74970													7521	0.993805	0.994347	0.996568	0.996074	0.997583	0.998964	0.996253	0.996276	0.996475	0.994251		7521	0.99606	0.00158321	0.000500655
7621	58422	100751	73182	50392	73832	74450	49904	56244	65314	74937													7621	0.994367	0.994347	0.996568	0.998015	0.998029	0.998964	0.996912	0.996276	0.997468	0.993814		7621	0.996476	0.00177211	0.00056039
7721	58422	100849	73247	50294	73832	74482	49936	56244	65347	75002													7721	0.994367	0.995314	0.997453	0.996074	0.998029	0.999394	0.997551	0.996276	0.997972	0.994676		7721	0.996711	0.00163179	0.000516017
7821	58519	100849	73214	50359	73864	74515	49904	56244	65314	74970													7821	0.996018	0.995314	0.997004	0.997361	0.998462	0.999836	0.996912	0.996276	0.997468	0.994251		7821	0.99689	0.00157427	0.000497829
7921	58487	100849	73247	50359	73897	74450	49936	56276	65314	75035													7921	0.995473	0.995314	0.997453	0.997361	0.998908	0.998964	0.997551	0.996843	0.997468	0.995113		7921	0.997045	0.00137817	0.000435815
8021	58454	100849	73279	50392	73864	74515	49936	56276	65347	75100													8021	0.994912	0.995314	0.997889	0.998015	0.998462	0.999836	0.997551	0.996843	0.997972	0.995975		8021	0.997277	0.00151885	0.000480304
8121	58519	100946	73247	50359	73832	74515	49936	56276	65379	75035													8121	0.996018	0.996271	0.997453	0.997361	0.998029	0.999836	0.997551	0.996843	0.99846	0.995113		8121	0.997294	0.00133726	0.000422877
8221	58519	100914	73279	50392	73864	74515	49936	56309	65347	75067													8221	0.996018	0.995955	0.997889	0.998015	0.998462	0.999836	0.997551	0.997427	0.997972	0.995538		8221	0.997466	0.0013103	0.000414352
8321	58519	101011	73247	50457	73897	74515	50001	56341	65379	75165													8321	0.996018	0.996913	0.997453	0.999302	0.998908	0.999836	0.99885	0.997994	0.99846	0.996837		8321	0.998057	0.0012272	0.000388075
8421	58519	101011	73279	50392	73897	74515	50001	56309	65379	75165													8421	0.996018	0.996913	0.997889	0.998015	0.998908	0.999836	0.99885	0.997427	0.99846	0.996837		8421	0.997915	0.00114802	0.000363036
8521	58552	101076	73344	50424	73897	74580	49969	56341	65379	75132													8521	0.99658	0.997554	0.998774	0.998649	0.998908	1.00071	0.998211	0.997994	0.99846	0.9964		8521	0.998224	0.00123437	0.000390342
8621	58584	101076	73312	50424	73930	74612	49969	56374	65412	75132													8621	0.997124	0.997554	0.998339	0.998649	0.999354	1.00114	0.998211	0.998579	0.998964	0.9964		8621	0.998431	0.00129923	0.000410853
8721	58617	101044	73344	50489	73995	74515	50001	56374	65379	75165													8721	0.997686	0.997238	0.998774	0.999936	1.00023	0.999836	0.99885	0.998579	0.99846	0.996837		8721	0.998643	0.00114835	0.00036314
8821	58617	101076	73409	50457	73897	74580	49969	56309	65379	75165													8821	0.997686	0.997554	0.99966	0.999302	0.998908	1.00071	0.998211	0.997427	0.99846	0.996837		8821	0.998475	0.00118243	0.000373917
8921	58617	101076	73344	50457	73897	74547	49969	56406	65444	75230													8921	0.997686	0.997554	0.998774	0.999302	0.998908	1.00027	0.998211	0.999146	0.999453	0.997699		8921	0.9987	0.000895057	0.000283042
9021	58617	101109	73377	50457	73930	74547	49969	56406	65444	75230													9021	0.997686	0.99788	0.999224	0.999302	0.999354	1.00027	0.998211	0.999146	0.999453	0.997699		9021	0.998822	0.000886574	0.000280359
9121	58617	101141	73377	50522	73962	74515	50034	56374	65412	75262													9121	0.997686	0.998196	0.999224	1.00059	0.999786	0.999836	0.999509	0.998579	0.998964	0.998124		9121	0.999049	0.000909759	0.000287691
9221	58649	101109	73344	50457	73962	74580	50034	56374	65444	75230													9221	0.998231	0.99788	0.998774	0.999302	0.999786	1.00071	0.999509	0.998579	0.999453	0.997699		9221	0.998992	0.000934471	0.000295506
9321	58714	101174	73409	50457	73962	74580	50001	56439	65412	75295													9321	0.999337	0.998521	0.99966	0.999302	0.999786	1.00071	0.99885	0.99973	0.998964	0.998561		9321	0.999342	0.000665446	0.000210432
9421	58649	101174	73344	50457	73930	74547	49969	56406	65444	75327													9421	0.998231	0.998521	0.998774	0.999302	0.999354	1.00027	0.998211	0.999146	0.999453	0.998986		9421	0.999024	0.000626649	0.000198164
9521	58682	101174	73409	50457	73995	74547	50034	56406	65477	75295													9521	0.998792	0.998521	0.99966	0.999302	1.00023	1.00027	0.999509	0.999146	0.999957	0.998561		9521	0.999395	0.000645535	0.000204136
9621	58649	101206	73377	50489	73962	74580	50034	56406	65444	75295													9621	0.998231	0.998837	0.999224	0.999936	0.999786	1.00071	0.999509	0.999146	0.999453	0.998561		9621	0.999339	0.00071566	0.000226312
9721	58682	101239	73409	50489	73995	74547	50034	56439	65444	75295													9721	0.998792	0.999163	0.99966	0.999936	1.00023	1.00027	0.999509	0.99973	0.999453	0.998561		9721	0.99953	0.00056565	0.000178874
9821	58649	101271	73409	50489	73995	74580	50066	56374	65412	75327													9821	0.998231	0.999479	0.99966	0.999936	1.00023	1.00071	1.00015	0.998579	0.998964	0.998986		9821	0.999492	0.000791904	0.000250422
9921	58747	101206	73442	50457	74027	74580	50034	56406	65477	75295													9921	0.999899	0.998837	1.00011	0.999302	1.00066	1.00071	0.999509	0.999146	0.999957	0.998561		9921	0.999669	0.000726839	0.000229847
10021	58714	101206	73442	50489	73995	74515	50034	56406	65477	75327													10021	0.999337	0.998837	1.00011	0.999936	1.00023	0.999836	0.999509	0.999146	0.999957	0.998986		10021	0.999589	0.00049405	0.000156232
10121	58649	101271	73409	50457	73995	74580	50099	56406	65477	75360													10121	0.998231	0.999479	0.99966	0.999302	1.00023	1.00071	1.00081	0.999146	0.999957	0.999423		10121	0.999695	0.000770643	0.000243699
10221	58747	101239	73442	50489	73962	74515	50034	56471	65444	75327													10221	0.999899	0.999163	1.00011	0.999936	0.999786	0.999836	0.999509	1.0003	0.999453	0.998986		10221	0.999697	0.000413725	0.000130831
10321	58747	101271	73442	50489	73962	74547	50034	56439	65477	75360													10321	0.999899	0.999479	1.00011	0.999936	0.999786	1.00027	0.999509	0.99973	0.999957	0.999423		10321	0.999809	0.0002787	8.81325e-05
10421	58714	101271	73409	50489	73995	74547	50066	56471	65444	75425													10421	0.999337	0.999479	0.99966	0.999936	1.00023	1.00027	1.00015	1.0003	0.999453	1.00029		10421	0.999909	0.000389356	0.000123125
10521	58747	101336	73474	50489	73995	74547	50034	56439	65509	75425													10521	0.999899	1.00012	1.00054	0.999936	1.00023	1.00027	0.999509	0.99973	1.00045	1.00029		10521	1.0001	0.000324973	0.000102765
10621	58747	101239	73409	50522	73962	74580	50099	56439	65444	75360													10621	0.999899	0.999163	0.99966	1.00059	0.999786	1.00071	1.00081	0.99973	0.999453	0.999423		10621	0.999922	0.000579054	0.000183113
10721	58747	101271	73442	50522	73962	74515	50099	56471	65509	75393													10721	0.999899	0.999479	1.00011	1.00059	0.999786	0.999836	1.00081	1.0003	1.00045	0.999861		10721	1.00011	0.000414847	0.000131186
10821	58747	101336	73409	50489	73995	74580	50066	56439	65477	75425													10821	0.999899	1.00012	0.99966	0.999936	1.00023	1.00071	1.00015	0.99973	0.999957	1.00029		10821	1.00007	0.000304285	9.62232e-05
10921	58779	101401	73409	50489	73995	74515	50034	56471	65509	75393													10921	1.00044	1.00076	0.99966	0.999936	1.00023	0.999836	0.999509	1.0003	1.00045	0.999861		10921	1.0001	0.000398375	0.000125977
11021	58779	101336	73409	50489	73930	74515	50066	56504	65509	75425													11021	1.00044	1.00012	0.99966	0.999936	0.999354	0.999836	1.00015	1.00088	1.00045	1.00029		11021	1.00011	0.000438605	0.000138699
11121	58747	101336	73409	50489	73995	74515	50066	56406	65509	75425													11121	0.999899	1.00012	0.99966	0.999936	1.00023	0.999836	1.00015	0.999146	1.00045	1.00029		11121	0.999971	0.00037258	0.00011782
11221	58747	101304	73442	50489	73995	74547	50099	56504	65509	75393													11221	0.999899	0.999804	1.00011	0.999936	1.00023	1.00027	1.00081	1.00088	1.00045	0.999861		11221	1.00022	0.000384949	0.000121731
11321	58747	101369	73442	50457	73995	74482	50066	56439	65444	75393													11321	0.999899	1.00045	1.00011	0.999302	1.00023	0.999394	1.00015	0.99973	0.999453	0.999861		11321	0.999857	0.000385833	0.000122011
11421	58779	101369	73442	50489	73962	74482	50034	56471	65477	75393													11421	1.00044	1.00045	1.00011	0.999936	0.999786	0.999394	0.999509	1.0003	0.999957	0.999861		11421	0.999974	0.000360275	0.000113929
11521	58779	101369	73442	50522	73995	74515	50066	56471	65477	75425													11521	1.00044	1.00045	1.00011	1.00059	1.00023	0.999836	1.00015	1.0003	0.999957	1.00029		11521	1.00023	0.000230799	7.29852e-05
11621	58812	101336	73474	50489	73930	74515	50034	56504	65509	75458													11621	1.00101	1.00012	1.00054	0.999936	0.999354	0.999836	0.999509	1.00088	1.00045	1.00072		11621	1.00024	0.000572946	0.000181181
11721	58779	101401	73442	50489	73962	74515	50034	56439	65444	75425													11721	1.00044	1.00076	1.00011	0.999936	0.999786	0.999836	0.999509	0.99973	0.999453	1.00029		11721	0.999985	0.000415992	0.000131548
11821	58747	101369	73442	50489	73995	74547	50066	56439	65477	75425													11821	0.999899	1.00045	1.00011	0.999936	1.00023	1.00027	1.00015	0.99973	0.999957	1.00029		11821	1.0001	0.00021763	6.88205e-05
11921	58779	101369	73474	50522	73995	74515	50066	56439	65477	75458													11921	1.00044	1.00045	1.00054	1.00059	1.00023	0.999836	1.00015	0.99973	0.999957	1.00072		11921	1.00027	0.000339475	0.000107351
12021	58779	101401	73409	50489	73962	74482	50034	56471	65477	75458													12021	1.00044	1.00076	0.99966	0.999936	0.999786	0.999394	0.999509	1.0003	0.999957	1.00072		12021	1.00005	0.000487886	0.000154283
12121	58779	101369	73442	50522	73995	74547	50066	56471	65509	75458													12121	1.00044	1.00045	1.00011	1.00059	1.00023	1.00027	1.00015	1.0003	1.00045	1.00072		12121	1.00037	0.000194972	6.16555e-05
12221	58747	101434	73474	50489	73995	74482	50066	56471	65477	75458													12221	0.999899	1.00109	1.00054	0.999936	1.00023	0.999394	1.00015	1.0003	0.999957	1.00072		12221	1.00022	0.000478219	0.000151226
12321	58779	101369	73474	50522	73962	74482	50034	56439	65509	75490													12321	1.00044	1.00045	1.00054	1.00059	0.999786	0.999394	0.999509	0.99973	1.00045	1.00115		12321	1.0002	0.000564475	0.000178503
12421	58747	101401	73442	50489	73962	74450	50034	56471	65444	75490													12421	0.999899	1.00076	1.00011	0.999936	0.999786	0.998964	0.999509	1.0003	0.999453	1.00115		12421	0.999986	0.000638402	0.000201881
12521	58779	101434	73474	50489	73962	74450	50034	56439	65444	75458													12521	1.00044	1.00109	1.00054	0.999936	0.999786	0.998964	0.999509	0.99973	0.999453	1.00072		12521	1.00002	0.000660896	0.000208994
12621	58779	101401	73442	50489	73930	74450	50034	56471	65477	75458													12621	1.00044	1.00076	1.00011	0.999936	0.999354	0.998964	0.999509	1.0003	0.999957	1.00072		12621	1.00001	0.000590369	0.000186691
12721	58812	101434	73377	50457	73962	74482	50066	56439	65444	75490													12721	1.00101	1.00109	0.999224	0.999302	0.999786	0.999394	1.00015	0.99973	0.999453	1.00115		12721	1.00003	0.000774495	0.000244917
12821	58779	101401	73409	50489	73930	74482	50066	56471	65444	75490													12821	1.00044	1.00076	0.99966	0.999936	0.999354	0.999394	1.00015	1.0003	0.999453	1.00115		12821	1.00006	0.000612188	0.000193591
12921	58812	101401	73409	50457	73930	74482	50034	56471	65477	75490													12921	1.00101	1.00076	0.99966	0.999302	0.999354	0.999394	0.999509	1.0003	0.999957	1.00115		12921	1.00004	0.000715807	0.000226358
13021	58812	101401	73507	50457	73930	74450	50099	56504	65477	75490													13021	1.00101	1.00076	1.00099	0.999302	0.999354	0.998964	1.00081	1.00088	0.999957	1.00115		13021	1.00032	0.000836395	0.000264491
13121	58812	101434	73409	50457	73962	74482	50099	56504	65477	75490													13121	1.00101	1.00109	0.99966	0.999302	0.999786	0.999394	1.00081	1.00088	0.999957	1.00115		13121	1.0003	0.000748336	0.000236645
13221	58812	101401	73442	50489	73930	74450	50066	56439	65477	75490													13221	1.00101	1.00076	1.00011	0.999936	0.999354	0.998964	1.00015	0.99973	0.999957	1.00115		13221	1.00011	0.000698127	0.000220767
13321	58812	101369	73409	50457	73962	74417	50034	56471	65477	75490													13321	1.00101	1.00045	0.99966	0.999302	0.999786	0.998521	0.999509	1.0003	0.999957	1.00115		13321	0.999963	0.000794262	0.000251168
13421	58779	101434	73442	50522	73930	74482	50066	56439	65477	75458													13421	1.00044	1.00109	1.00011	1.00059	0.999354	0.999394	1.00015	0.99973	0.999957	1.00072		13421	1.00015	0.000568404	0.000179745
13521	58812	101401	73474	50489	73962	74450	50034	56471	65444	75490													13521	1.00101	1.00076	1.00054	0.999936	0.999786	0.998964	0.999509	1.0003	0.999453	1.00115		13521	1.00014	0.000727037	0.000229909
13621	58779	101434	73409	50489	73897	74385	50034	56504	65444	75458													13621	1.00044	1.00109	0.99966	0.999936	0.998908	0.998092	0.999509	1.00088	0.999453	1.00072		13621	0.999869	0.000942899	0.000298171
13721	58779	101434	73409	50489	73897	74450	50066	56504	65444	75490													13721	1.00044	1.00109	0.99966	0.999936	0.998908	0.998964	1.00015	1.00088	0.999453	1.00115		13721	1.00006	0.000825998	0.000261204
13821	58812	101466	73409	50489	73930	74417	50034	56439	65477	75490													13821	1.00101	1.0014	0.99966	0.999936	0.999354	0.998521	0.999509	0.99973	0.999957	1.00115		13821	1.00002	0.000902495	0.000285394
13921	58779	101466	73442	50489	73930	74450	50034	56406	65444	75490													13921	1.00044	1.0014	1.00011	0.999936	0.999354	0.998964	0.999509	0.999146	0.999453	1.00115		13921	0.999946	0.000832029	0.000263111
15321	58747	101434	73344	50457	73897	74320	49969	56439	65412	75490													15321	0.999899	1.00109	0.998774	0.999302	0.998908	0.99722	0.998211	0.99973	0.998964	1.00115		15321	0.999324	0.00121115	0.000382999
16321	58779	101401	73377	50424	73799	74320	50001	56439	65347	75425													16321	1.00044	1.00076	0.999224	0.998649	0.997583	0.99722	0.99885	0.99973	0.997972	1.00029		16321	0.999072	0.00123609	0.000390886
17321	58747	101401	73312	50392	73799	74222	49936	56374	65217	75393													17321	0.999899	1.00076	0.998339	0.998015	0.997583	0.995905	0.997551	0.998579	0.995986	0.999861		17321	0.998248	0.00161073	0.000509358
18321	58779	101369	73247	50359	73734	74157	49871	56341	65249	75425													18321	1.00044	1.00045	0.997453	0.997361	0.996704	0.995033	0.996253	0.997994	0.996475	1.00029		18321	0.997845	0.00192939	0.000610125
19321	58714	101336	73247	50359	73702	74125	49904	56406	65249	75360													19321	0.999337	1.00012	0.997453	0.997361	0.996272	0.994603	0.996912	0.999146	0.996475	0.999423		19321	0.99771	0.0017487	0.000552988
20321	58682	101271	73149	50327	73669	74027	49871	56309	65184	75327													20321	0.998792	0.999479	0.996119	0.996727	0.995826	0.993288	0.996253	0.997427	0.995482	0.998986		20321	0.996838	0.00188817	0.000597091
21321	58649	101206	73149	50294	73637	73995	49839	56309	65119	75327													21321	0.998231	0.998837	0.996119	0.996074	0.995393	0.992859	0.995614	0.997427	0.99449	0.998986		21321	0.996403	0.00197309	0.000623946
22321	58617	101174	73084	50262	73539	73962	49806	56244	65087	75295													22321	0.997686	0.998521	0.995234	0.99544	0.994068	0.992416	0.994954	0.996276	0.994001	0.998561		22321	0.995716	0.00204379	0.000646303
23321	58552	101109	73117	50229	73539	73864	49806	56244	65087	75262													23321	0.99658	0.99788	0.995683	0.994787	0.994068	0.991101	0.994954	0.996276	0.994001	0.998124		23321	0.995345	0.00206994	0.000654572
24321	58584	101044	73052	50196	73474	73864	49741	56244	64989	75262													24321	0.997124	0.997238	0.994798	0.994133	0.99319	0.991101	0.993656	0.996276	0.992504	0.998124		24321	0.994815	0.00230624	0.000729297
25321	58519	101044	73052	50164	73442	73799	49774	56211	64956	75230													25321	0.996018	0.997238	0.994798	0.993499	0.992757	0.990229	0.994315	0.995691	0.992	0.997699		25321	0.994425	0.00235824	0.000745742
26321	58519	101044	72987	50164	73409	73734	49676	56211	64956	75132													26321	0.996018	0.997238	0.993913	0.993499	0.992311	0.989357	0.992358	0.995691	0.992	0.9964		26321	0.993879	0.00245845	0.000777431
27321	58487	100979	72954	50066	73344	73669	49676	56113	64891	75132													27321	0.995473	0.996597	0.993464	0.991558	0.991432	0.988485	0.992358	0.993955	0.991008	0.9964		27321	0.993073	0.00260324	0.000823218
28321	58422	100914	72954	50099	73344	73637	49644	56146	64859	75100													28321	0.994367	0.995955	0.993464	0.992212	0.991432	0.988055	0.991718	0.99454	0.990519	0.995975		28321	0.992824	0.00251786	0.000796217
29321	58389	100849	72922	50066	73279	73572	49644	56113	64794	75067													29321	0.993805	0.995314	0.993028	0.991558	0.990554	0.987183	0.991718	0.993955	0.989526	0.995538		29321	0.992218	0.00264252	0.000835639
30321	58357	100816	72857	50034	73214	73507	49611	56081	64761	75035													30321	0.993261	0.994988	0.992143	0.990925	0.989675	0.986311	0.991059	0.993389	0.989022	0.995113		30321	0.991589	0.00277175	0.000876504
31321	58357	100816	72857	49969	73182	73507	49546	56016	64729	75035													31321	0.993261	0.994988	0.992143	0.989637	0.989243	0.986311	0.989761	0.992237	0.988534	0.995113		31321	0.991123	0.00289004	0.000913912
32321	58324	100686	72792	49969	73117	73474	49514	56016	64631	74970													32321	0.992699	0.993705	0.991257	0.989637	0.988364	0.985868	0.989121	0.992237	0.987037	0.994251		32321	0.990418	0.00285496	0.000902818
33321	58357	100654	72759	49936	73117	73409	49481	55951	64599	75002													33321	0.993261	0.993389	0.990808	0.988984	0.988364	0.984996	0.988462	0.991086	0.986548	0.994676		33321	0.990057	0.00314126	0.000993353
34321	58292	100621	72727	49936	73117	73344	49416	55951	64566	74872													34321	0.992154	0.993064	0.990372	0.988984	0.988364	0.984124	0.987164	0.991086	0.986044	0.992952		34321	0.989431	0.00303215	0.00095885
35321	58259	100621	72694	49904	73052	73344	49481	55918	64599	74872													35321	0.991593	0.993064	0.989923	0.98835	0.987485	0.984124	0.988462	0.990501	0.986548	0.992952		35321	0.9893	0.00286448	0.000905829
36321	58194	100621	72694	49871	73019	73312	49384	55918	64534	74840													36321	0.990486	0.993064	0.989923	0.987696	0.987039	0.983695	0.986524	0.990501	0.985556	0.992527		36321	0.988701	0.00307426	0.000972168
37321	58194	100491	72629	49806	72922	73279	49351	55886	64469	74807													37321	0.990486	0.991781	0.989038	0.986409	0.985728	0.983252	0.985865	0.989935	0.984563	0.99209		37321	0.987915	0.00313679	0.000991939
38321	58162	100491	72597	49871	72922	73182	49384	55886	64404	74775													38321	0.989942	0.991781	0.988602	0.987696	0.985728	0.98195	0.986524	0.989935	0.98357	0.991665		38321	0.987739	0.00330949	0.00104655
39321	58097	100491	72597	49839	72889	73182	49351	55821	64404	74742													39321	0.988835	0.991781	0.988602	0.987063	0.985282	0.98195	0.985865	0.988783	0.98357	0.991228		39321	0.987296	0.00317055	0.00100261
40321	58129	100393	72532	49806	72889	73117	49319	55853	64371	74710													40321	0.98938	0.990814	0.987717	0.986409	0.985282	0.981078	0.985226	0.98935	0.983066	0.990803		40321	0.986912	0.00329344	0.00104148
41321	58097	100361	72499	49741	72857	73182	49221	55788	64339	74742													41321	0.988835	0.990498	0.987267	0.985122	0.984849	0.98195	0.983268	0.988199	0.982578	0.991228		41321	0.986379	0.00330432	0.00104492
42321	58129	100296	72499	49741	72792	73084	49254	55788	64306	74710													42321	0.98938	0.989856	0.987267	0.985122	0.983971	0.980635	0.983927	0.988199	0.982074	0.990803		42321	0.986123	0.00348063	0.00110067
43321	57999	100296	72467	49741	72792	73019	49254	55756	64241	74677													43321	0.987167	0.989856	0.986832	0.985122	0.983971	0.979763	0.983927	0.987632	0.981081	0.990365		43321	0.985572	0.00348152	0.00110095
44321	57999	100198	72434	49709	72759	73019	49221	55691	64241	74645													44321	0.987167	0.988889	0.986382	0.984488	0.983525	0.979763	0.983268	0.98648	0.981081	0.989941		44321	0.985099	0.00327383	0.00103528
45321	57967	100198	72402	49676	72694	72987	49189	55723	64241	74645													45321	0.986623	0.988889	0.985947	0.983834	0.982646	0.979334	0.982629	0.987047	0.981081	0.989941		45321	0.984797	0.00344533	0.00108951
46321	57967	100198	72336	49644	72662	72954	49189	55691	64176	74580													46321	0.986623	0.988889	0.985048	0.983201	0.982213	0.978891	0.982629	0.98648	0.980088	0.989079		46321	0.984314	0.0034953	0.00110531
47321	57934	100198	72369	49611	72629	72857	49124	55658	64176	74580													47321	0.986061	0.988889	0.985497	0.982547	0.981767	0.97759	0.98133	0.985896	0.980088	0.989079		47321	0.983874	0.00380413	0.00120297
48321	57869	100101	72336	49644	72629	72889	49124	55658	64144	74547													48321	0.984955	0.987932	0.985048	0.983201	0.981767	0.978019	0.98133	0.985896	0.9796	0.988641		48321	0.983639	0.00348309	0.00110145
49321	57869	100068	72304	49579	72629	72824	49091	55658	64111	74547													49321	0.984955	0.987606	0.984612	0.981913	0.981767	0.977147	0.980671	0.985896	0.979096	0.988641		49321	0.98323	0.00372594	0.00117824
50321	57869	100068	72304	49546	72564	72857	49091	55626	64014	74515													50321	0.984955	0.987606	0.984612	0.98126	0.980889	0.97759	0.980671	0.985329	0.977614	0.988217		50321	0.982874	0.00381964	0.00120787
51321	57837	100003	72206	49579	72564	72857	49059	55626	64046	74482													51321	0.98441	0.986964	0.983278	0.981913	0.980889	0.97759	0.980032	0.985329	0.978103	0.987779		51321	0.982629	0.00353352	0.0011174
52321	57804	100003	72271	49579	72532	72792	48994	55658	63981	74417													52321	0.983848	0.986964	0.984163	0.981913	0.980456	0.976717	0.978733	0.985896	0.97711	0.986917		52321	0.982272	0.00389065	0.00123033
53321	57772	99938	72239	49514	72467	72694	49026	55593	64014	74450													53321	0.983304	0.986323	0.983727	0.980626	0.979578	0.975402	0.979373	0.984744	0.977614	0.987355		53321	0.981805	0.00389612	0.00123206
54321	57772	99873	72239	49546	72467	72759	48994	55561	63916	74417													54321	0.983304	0.985681	0.983727	0.98126	0.979578	0.976275	0.978733	0.984178	0.976118	0.986917		54321	0.981577	0.00379821	0.0012011
55321	57739	99873	72206	49449	72434	72727	48961	55561	63949	74385													55321	0.982742	0.985681	0.983278	0.979339	0.979131	0.975845	0.978074	0.984178	0.976622	0.986493		55321	0.981138	0.00381183	0.00120541
56321	57707	99841	72174	49416	72369	72662	48961	55561	63949	74352													56321	0.982197	0.985366	0.982842	0.978685	0.978253	0.974973	0.978074	0.984178	0.976622	0.986055		56321	0.980724	0.00388358	0.0012281
57321	57707	99808	72174	49481	72336	72629	48896	55528	63949	74352													57321	0.982197	0.98504	0.982842	0.979972	0.977807	0.97453	0.976776	0.983593	0.976622	0.986055		57321	0.980543	0.00396468	0.00125374
58321	57674	99808	72076	49449	72304	72597	48896	55496	63884	74352													58321	0.981636	0.98504	0.981507	0.979339	0.977374	0.974101	0.976776	0.983026	0.975629	0.986055		58321	0.980048	0.00405222	0.00128142
59321	57707	99743	72109	49416	72304	72597	48896	55463	63851	74320													59321	0.982197	0.984398	0.981957	0.978685	0.977374	0.974101	0.976776	0.982442	0.975125	0.985631		59321	0.979869	0.00398728	0.00126089
60321	57674	99711	72076	49416	72271	72564	48864	55496	63819	74320													60321	0.981636	0.984083	0.981507	0.978685	0.976928	0.973658	0.976137	0.983026	0.974636	0.985631		60321	0.979593	0.00416205	0.00131615
61321	57576	99678	72076	49416	72271	72564	48831	55431	63786	74287													61321	0.979968	0.983757	0.981507	0.978685	0.976928	0.973658	0.975477	0.981875	0.974132	0.985193		61321	0.979118	0.00401892	0.00127089
62321	57609	99646	72076	49384	72239	72499	48831	55431	63819	74352													62321	0.980529	0.983441	0.981507	0.978051	0.976496	0.972786	0.975477	0.981875	0.974636	0.986055		62321	0.979085	0.00426298	0.00134807
63321	57609	99613	72011	49351	72206	72499	48766	55463	63786	74287													63321	0.980529	0.983115	0.980622	0.977398	0.976049	0.972786	0.974179	0.982442	0.974132	0.985193		63321	0.978645	0.00431628	0.00136493
64321	57544	99613	72076	49351	72239	72467	48799	55463	63721	74190													64321	0.979423	0.983115	0.981507	0.977398	0.976496	0.972357	0.974838	0.982442	0.97314	0.983907		64321	0.978462	0.00423049	0.0013378
65321	57511	99581	72044	49351	72206	72434	48733	55398	63721	74222													65321	0.978861	0.9828	0.981071	0.977398	0.976049	0.971914	0.97352	0.98129	0.97314	0.984331		65321	0.978037	0.00433354	0.00137039
66321	57544	99613	71979	49351	72141	72402	48733	55463	63689	74190													66321	0.979423	0.983115	0.980186	0.977398	0.975171	0.971484	0.97352	0.982442	0.972651	0.983907		66321	0.97793	0.00455888	0.00144164
67321	57511	99548	71979	49286	72109	72434	48733	55398	63689	74190													67321	0.978861	0.982474	0.980186	0.97611	0.974738	0.971914	0.97352	0.98129	0.972651	0.983907		67321	0.977565	0.00433722	0.00137155
68321	57479	99483	72011	49286	72109	72369	48733	55366	63656	74222													68321	0.978317	0.981832	0.980622	0.97611	0.974738	0.971042	0.97352	0.980724	0.972147	0.984331		68321	0.977338	0.0044938	0.00142106
69321	57544	99483	71914	49351	72109	72402	48701	55398	63656	74190													69321	0.979423	0.981832	0.979301	0.977398	0.974738	0.971484	0.97288	0.98129	0.972147	0.983907		69321	0.97744	0.00440849	0.00139409
70321	57446	99516	71946	49286	72109	72369	48668	55431	63591	74157													70321	0.977755	0.982158	0.979737	0.97611	0.974738	0.971042	0.972221	0.981875	0.971154	0.983469		70321	0.977026	0.00469865	0.00148584
71321	57479	99451	71946	49221	72044	72336	48636	55366	63624	74125													71321	0.978317	0.981517	0.979737	0.974823	0.97386	0.970599	0.971582	0.980724	0.971658	0.983045		71321	0.976586	0.00461618	0.00145977
72321	57479	99418	71881	49221	72044	72304	48603	55333	63559	74190													72321	0.978317	0.981191	0.978852	0.974823	0.97386	0.970169	0.970923	0.980139	0.970666	0.983907		72321	0.976285	0.00487036	0.00154014
73321	57381	99386	71881	49221	72044	72304	48603	55301	63559	74125													73321	0.976649	0.980875	0.978852	0.974823	0.97386	0.970169	0.970923	0.979572	0.970666	0.983045		73321	0.975943	0.00458107	0.00144866
74321	57446	99386	71914	49221	71979	72271	48603	55333	63559	74092													74321	0.977755	0.980875	0.979301	0.974823	0.972981	0.969727	0.970923	0.980139	0.970666	0.982607		74321	0.97598	0.00474479	0.00150043
75321	57381	99321	71881	49221	72011	72239	48603	55301	63559	74027													75321	0.976649	0.980234	0.978852	0.974823	0.973414	0.969297	0.970923	0.979572	0.970666	0.981745		75321	0.975617	0.00444744	0.0014064
76321	57381	99353	71849	49189	71946	72239	48538	55301	63461	74060													76321	0.976649	0.980549	0.978416	0.974189	0.972535	0.969297	0.969624	0.979572	0.969169	0.982183		76321	0.975218	0.00493694	0.0015612
77321	57381	99288	71849	49221	71946	72239	48571	55268	63493	74060													77321	0.976649	0.979908	0.978416	0.974823	0.972535	0.969297	0.970283	0.978988	0.969658	0.982183		77321	0.975274	0.00465039	0.00147058
78321	57381	99288	71849	49156	71946	72206	48538	55268	63461	74027													78321	0.976649	0.979908	0.978416	0.973536	0.972535	0.968854	0.969624	0.978988	0.969169	0.981745		78321	0.974942	0.00481582	0.0015229
79321	57316	99256	71816	49156	71946	72206	48506	55268	63493	74027													79321	0.975542	0.979592	0.977967	0.973536	0.972535	0.968854	0.968985	0.978988	0.969658	0.981745		79321	0.97474	0.00473305	0.00149672
80321	57381	99256	71849	49124	71914	72174	48538	55301	63461	74027													80321	0.976649	0.979592	0.978416	0.972902	0.972102	0.968425	0.969624	0.979572	0.969169	0.981745		80321	0.97482	0.00494952	0.00156518
81321	57349	99256	71816	49124	71849	72141	48473	55268	63461	73995													81321	0.976104	0.979592	0.977967	0.972902	0.971224	0.967982	0.968326	0.978988	0.969169	0.981321		81321	0.974357	0.00504743	0.00159614
82321	57316	99223	71751	49156	71849	72109	48538	55236	63428	73995													82321	0.975542	0.979266	0.977081	0.973536	0.971224	0.967553	0.969624	0.978421	0.968665	0.981321		82321	0.974223	0.00482294	0.00152515
83321	57284	99223	71784	49124	71849	72141	48473	55268	63396	73995													83321	0.974998	0.979266	0.977531	0.972902	0.971224	0.967982	0.968326	0.978988	0.968176	0.981321		83321	0.974071	0.00506466	0.00160159
84321	57284	99191	71751	49124	71784	72141	48473	55268	63428	73930													84321	0.974998	0.978951	0.977081	0.972902	0.970345	0.967982	0.968326	0.978988	0.968665	0.980459		84321	0.97387	0.00486322	0.00153789
85321	57251	99158	71751	49124	71849	72076	48408	55236	63428	73930													85321	0.974436	0.978625	0.977081	0.972902	0.971224	0.96711	0.967027	0.978421	0.968665	0.980459		85321	0.973595	0.00499066	0.00157819
86321	57219	99126	71751	49124	71784	72076	48441	55203	63396	73962													86321	0.973891	0.978309	0.977081	0.972902	0.970345	0.96711	0.967686	0.977836	0.968176	0.980883		86321	0.973422	0.00497373	0.00157283
87321	57316	99158	71719	49059	71784	72044	48408	55236	63396	73962													87321	0.975542	0.978625	0.976646	0.971615	0.970345	0.966681	0.967027	0.978421	0.968176	0.980883		87321	0.973396	0.005262	0.00166399
88321	57251	99158	71719	49091	71784	72044	48376	55203	63363	73930													88321	0.974436	0.978625	0.976646	0.972248	0.970345	0.966681	0.966388	0.977836	0.967672	0.980459		88321	0.973134	0.00522267	0.00165155
89321	57251	99093	71784	49026	71751	71979	48376	55236	63363	73930													89321	0.974436	0.977983	0.977531	0.970961	0.969899	0.965809	0.966388	0.978421	0.967672	0.980459		89321	0.972956	0.0054774	0.00173211
90321	57219	99061	71686	49059	71686	72011	48376	55203	63266	73864													90321	0.973891	0.977668	0.976196	0.971615	0.96902	0.966238	0.966388	0.977836	0.966191	0.979583		90321	0.972463	0.00527264	0.00166735
101621	57089	98898	71621	48961	71556	71849	48213	55106	63168	73799													101621	0.971679	0.976059	0.975311	0.969674	0.967263	0.964064	0.963132	0.976118	0.964694	0.978721		101621	0.970672	0.00572397	0.00181008
111621	57056	98768	71524	48929	71459	71686	48116	55041	63136	73669													111621	0.971117	0.974776	0.97399	0.96904	0.965952	0.961877	0.961194	0.974967	0.964206	0.976997		111621	0.969412	0.0058172	0.00183956
121621	56991	98670	71524	48864	71361	71589	48018	55041	63006	73604													121621	0.970011	0.973809	0.97399	0.967753	0.964627	0.960576	0.959236	0.974967	0.96222	0.976135		121621	0.968332	0.00636001	0.00201121
131621	56926	98573	71524	48799	71264	71556	47953	55008	63006	73507													131621	0.968905	0.972851	0.97399	0.966465	0.963316	0.960133	0.957938	0.974382	0.96222	0.974849		131621	0.967505	0.00637936	0.00201733
141621	56894	98475	71491	48799	71199	71459	47888	54976	62876	73344													141621	0.96836	0.971884	0.973541	0.966465	0.962437	0.958831	0.956639	0.973815	0.960235	0.972687		141621	0.96649	0.0065457	0.00206993
151621	56861	98378	71459	48766	71166	71426	47791	54943	62843	73279													151621	0.967798	0.970927	0.973105	0.965812	0.961991	0.958388	0.954702	0.973231	0.959731	0.971825		151621	0.965751	0.00670474	0.00212022
161621	56829	98313	71459	48733	71101	71361	47726	54943	62778	73149													161621	0.967254	0.970285	0.973105	0.965158	0.961113	0.957516	0.953403	0.973231	0.958738	0.970101		161621	0.96499	0.00697065	0.00220431
171621	56829	98248	71459	48733	71036	71296	47661	54911	62648	73052													171621	0.967254	0.969644	0.973105	0.965158	0.960234	0.956644	0.952105	0.972664	0.956753	0.968815		171621	0.964237	0.00735356	0.0023254
181621	56861	98183	71426	48701	71004	71264	47628	54878	62681	73019													181621	0.967798	0.969002	0.972656	0.964524	0.959801	0.956215	0.951445	0.972079	0.957257	0.968377		181621	0.963916	0.00730551	0.0023102
191621	56829	98183	71394	48733	70971	71231	47466	54911	62648	72857													191621	0.967254	0.969002	0.97222	0.965158	0.959355	0.955772	0.948209	0.972664	0.956753	0.966229		191621	0.963262	0.00795988	0.00251713
201621	56829	98118	71394	48701	70939	71199	47433	54943	62551	72792													201621	0.967254	0.968361	0.97222	0.964524	0.958923	0.955343	0.94755	0.973231	0.955272	0.965367		201621	0.962804	0.00828478	0.00261988
211621	56829	98118	71296	48701	70873	71231	47368	54878	62518	72694													211621	0.967254	0.968361	0.970885	0.964524	0.958031	0.955772	0.946252	0.972079	0.954768	0.964067		211621	0.962199	0.00825778	0.00261134
221621	56829	98053	71231	48636	70841	71166	47303	54911	62453	72564													221621	0.967254	0.967719	0.97	0.963237	0.957598	0.9549	0.944953	0.972664	0.953775	0.962343		221621	0.961444	0.00859349	0.0027175
231621	56861	98085	71166	48636	70776	71134	47173	54911	62453	72402													231621	0.967798	0.968035	0.969115	0.963237	0.956719	0.95447	0.942356	0.972664	0.953775	0.960194		231621	0.960836	0.00921202	0.0029131
241621	56829	98020	71069	48636	70776	71166	47075	54878	62356	72304													241621	0.967254	0.967394	0.967794	0.963237	0.956719	0.9549	0.940398	0.972079	0.952294	0.958895		241621	0.960096	0.00946299	0.00299246
251621	56926	98053	71004	48603	70711	71101	46945	54911	62356	72141													251621	0.968905	0.967719	0.966909	0.962584	0.955841	0.954028	0.937801	0.972664	0.952294	0.956733		251621	0.959548	0.0103678	0.00327859
261621	56894	98053	70873	48571	70678	71101	46848	54878	62258	72044													261621	0.96836	0.967719	0.965125	0.96195	0.955395	0.954028	0.935864	0.972079	0.950797	0.955447		261621	0.958676	0.0107124	0.00338756
271621	56926	98053	70808	48603	70613	71069	46750	54878	62193	71914													271621	0.968905	0.967719	0.96424	0.962584	0.954516	0.953598	0.933906	0.972079	0.949804	0.953723		271621	0.958107	0.0113966	0.00360391
281621	56926	97988	70711	48636	70548	71069	46620	54911	62128	71751													281621	0.968905	0.967078	0.962919	0.963237	0.953637	0.953598	0.931309	0.972664	0.948812	0.951561		281621	0.957372	0.0122053	0.00385966
291621	56991	97890	70581	48603	70418	71036	46523	54911	62128	71654													291621	0.970011	0.966111	0.961149	0.962584	0.95188	0.953155	0.929371	0.972664	0.948812	0.950274		291621	0.956601	0.0127413	0.00402915
301621	57024	97923	70516	48636	70418	71036	46393	54846	62030	71524													301621	0.970573	0.966436	0.960264	0.963237	0.95188	0.953155	0.926774	0.971513	0.947315	0.94855		301621	0.95597	0.0135096	0.00427212
311621	57056	97955	70451	48571	70321	70939	46328	54846	61998	71394													311621	0.971117	0.966752	0.959378	0.96195	0.950569	0.951854	0.925476	0.971513	0.946826	0.946826		311621	0.955226	0.014033	0.00443762
321621	57056	97890	70321	48636	70288	70939	46230	54878	62030	71264													321621	0.971117	0.966111	0.957608	0.963237	0.950123	0.951854	0.923518	0.972079	0.947315	0.945102		321621	0.954806	0.0146477	0.00463202
331621	57154	97825	70321	48701	70158	70873	46133	54813	61965	71166													331621	0.972785	0.965469	0.957608	0.964524	0.948365	0.950968	0.92158	0.970928	0.946322	0.943803		331621	0.954235	0.0154528	0.00488661
341621	57186	97793	70288	48668	70061	70841	46035	54781	61835	71101													341621	0.97333	0.965153	0.957159	0.963871	0.947054	0.950539	0.919623	0.970361	0.944337	0.942941		341621	0.953437	0.016082	0.00508557
351621	57154	97858	70223	48733	69996	70743	45970	54846	61835	70939													351621	0.972785	0.965795	0.956274	0.965158	0.946176	0.949224	0.918324	0.971513	0.944337	0.940792		351621	0.953038	0.0168118	0.00531634
361621	57186	97793	70191	48733	69898	70711	45905	54813	61803	70873													361621	0.97333	0.965153	0.955838	0.965158	0.944851	0.948795	0.917026	0.970928	0.943848	0.939917		361621	0.952484	0.0172201	0.00544548
371621	57284	97825	70191	48766	69833	70613	45840	54813	61738	70776													371621	0.974998	0.965469	0.955838	0.965812	0.943972	0.94748	0.915727	0.970928	0.942856	0.93863		371621	0.952171	0.0180639	0.00571231
381621	57251	97890	70191	48831	69768	70613	45775	54813	61673	70743													381621	0.974436	0.966111	0.955838	0.967099	0.943094	0.94748	0.914429	0.970928	0.941863	0.938193		381621	0.951947	0.0185837	0.00587669
391621	57284	97825	70223	48831	69671	70581	45710	54748	61640	70743													391621	0.974998	0.965469	0.956274	0.967099	0.941782	0.94705	0.91313	0.969777	0.941359	0.938193		391621	0.951513	0.0188969	0.00597571
401621	57284	97890	70223	48864	69573	70548	45710	54748	61510	70678													401621	0.974998	0.966111	0.956274	0.967753	0.940458	0.946608	0.91313	0.969777	0.939374	0.937331		401621	0.951181	0.0192973	0.00610236
411621	57251	97858	70256	48961	69508	70548	45710	54748	61510	70613													411621	0.974436	0.965795	0.956723	0.969674	0.939579	0.946608	0.91313	0.969777	0.939374	0.936469		411621	0.951156	0.019528	0.0061753
421621	57251	97923	70256	48994	69476	70516	45612	54683	61445	70581													421621	0.974436	0.966436	0.956723	0.970327	0.939146	0.946178	0.911173	0.968625	0.938381	0.936044		421621	0.950747	0.0201018	0.00635674
431621	57349	97955	70288	49091	69410	70548	45580	54716	61348	70516													431621	0.976104	0.966752	0.957159	0.972248	0.938254	0.946608	0.910533	0.96921	0.936899	0.935182		431621	0.950895	0.0209962	0.00663959
441621	57349	98020	70386	49124	69410	70548	45547	54683	61315	70483													441621	0.976104	0.967394	0.958493	0.972902	0.938254	0.946608	0.909874	0.968625	0.936396	0.934745		441621	0.950939	0.0213334	0.00674622
451621	57414	98020	70418	49221	69313	70516	45612	54650	61218	70451													451621	0.97721	0.967394	0.958929	0.974823	0.936943	0.946178	0.911173	0.968041	0.934914	0.93432		451621	0.950993	0.0216553	0.006848
461621	57414	98085	70451	49286	69248	70646	45580	54650	61185	70451													461621	0.97721	0.968035	0.959378	0.97611	0.936064	0.947922	0.910533	0.968041	0.93441	0.93432		461621	0.951203	0.0220892	0.00698523
471621	57414	98183	70516	49384	69248	70646	45580	54585	61153	70418													471621	0.97721	0.969002	0.960264	0.978051	0.936064	0.947922	0.910533	0.966889	0.933921	0.933883		471621	0.951374	0.0224462	0.00709812
481621	57479	98215	70613	49449	69248	70548	45612	54650	61023	70386													481621	0.978317	0.969318	0.961585	0.979339	0.936064	0.946608	0.911173	0.968041	0.931936	0.933458		481621	0.951584	0.0230545	0.00729046
491621	57479	98183	70646	49546	69313	70646	45645	54618	60990	70353													491621	0.978317	0.969002	0.962034	0.98126	0.936943	0.947922	0.911832	0.967474	0.931432	0.933021		491621	0.951924	0.0231371	0.00731658
501621	57544	98280	70711	49611	69313	70711	45645	54553	60893	70288													501621	0.979423	0.96996	0.962919	0.982547	0.936943	0.948795	0.911832	0.966322	0.929951	0.932159		501621	0.952085	0.0237166	0.00749985
511621	57642	98280	70841	49741	69248	70646	45677	54585	60860	70288													511621	0.981091	0.96996	0.964689	0.985122	0.936064	0.947922	0.912471	0.966889	0.929447	0.932159		511621	0.952581	0.024451	0.00773207
521621	57642	98248	70873	49839	69215	70743	45710	54585	60795	70256													521621	0.981091	0.969644	0.965125	0.987063	0.935618	0.949224	0.91313	0.966889	0.928454	0.931734		521621	0.952797	0.0247804	0.00783625
531621	57674	98313	70971	49871	69248	70743	45775	54553	60730	70288													531621	0.981636	0.970285	0.96646	0.987696	0.936064	0.949224	0.914429	0.966322	0.927461	0.932159		531621	0.953174	0.024847	0.00785731
541621	57739	98313	71004	49936	69183	70776	45808	54585	60633	70288													541621	0.982742	0.970285	0.966909	0.988984	0.935186	0.949667	0.915088	0.966889	0.92598	0.932159		541621	0.953389	0.0253712	0.00802307
551621	57772	98280	71101	50066	69248	70808	45840	54520	60535	70223													551621	0.983304	0.96996	0.96823	0.991558	0.936064	0.950096	0.915727	0.965738	0.924483	0.931297		551621	0.953646	0.0259304	0.00819991
561621	57869	98248	71199	50196	69183	70743	45905	54553	60470	70256													561621	0.984955	0.969644	0.969565	0.994133	0.935186	0.949224	0.917026	0.966322	0.923491	0.931734		561621	0.954128	0.0266207	0.00841821
571621	57967	98313	71296	50196	69150	70808	45970	54585	60437	70191													571621	0.986623	0.970285	0.970885	0.994133	0.93474	0.950096	0.918324	0.966889	0.922987	0.930872		571621	0.954583	0.0269642	0.00852684
581621	57967	98248	71361	50359	69118	70841	46035	54553	60340	70288													581621	0.986623	0.969644	0.971771	0.997361	0.934307	0.950539	0.919623	0.966322	0.921505	0.932159		581621	0.954985	0.0274097	0.0086677
591621	58032	98280	71426	50457	69150	70808	46003	54553	60177	70321													591621	0.987729	0.96996	0.972656	0.999302	0.93474	0.950096	0.918983	0.966322	0.919016	0.932596		591621	0.95514	0.028335	0.00896033
601621	58032	98215	71524	50554	69118	70841	46133	54553	60112	70321													601621	0.987729	0.969318	0.97399	1.00122	0.934307	0.950539	0.92158	0.966322	0.918023	0.932596		601621	0.955563	0.0285435	0.00902626
611621	58097	98183	71621	50619	69085	70841	46133	54650	60047	70418													611621	0.988835	0.969002	0.975311	1.00251	0.933861	0.950539	0.92158	0.968041	0.917031	0.933883		611621	0.956059	0.0291371	0.00921397
621621	58194	98183	71654	50717	69053	70873	46133	54650	59950	70451													621621	0.990486	0.969002	0.975761	1.00445	0.933429	0.950968	0.92158	0.968041	0.915549	0.93432		621621	0.956359	0.0299367	0.0094668
631621	58259	98183	71784	50782	68988	70906	46198	54683	59852	70516													631621	0.991593	0.969002	0.977531	1.00574	0.93255	0.951411	0.922879	0.968625	0.914053	0.935182		631621	0.956856	0.0305258	0.00965309
641621	58324	98150	71784	50912	68890	70939	46230	54716	59787	70581													641621	0.992699	0.968677	0.977531	1.00831	0.931225	0.951854	0.923518	0.96921	0.91306	0.936044		641621	0.957213	0.0312618	0.00988584
651621	58324	98118	71979	50944	68825	70971	46230	54716	59690	70678													651621	0.992699	0.968361	0.980186	1.00895	0.930347	0.952283	0.923518	0.96921	0.911579	0.937331		651621	0.957446	0.0317811	0.0100501
661621	58454	98085	72011	51074	68728	70939	46328	54716	59592	70776													661621	0.994912	0.968035	0.980622	1.01152	0.929035	0.951854	0.925476	0.96921	0.910082	0.93863		661621	0.957938	0.0326105	0.0103123
671621	58519	98085	72109	51139	68565	71004	46360	54748	59560	70808													671621	0.996018	0.968035	0.981957	1.01281	0.926832	0.952726	0.926115	0.969777	0.909593	0.939055		671621	0.958292	0.0332998	0.0105303
681621	58649	98085	72206	51204	68435	71036	46328	54748	59430	70873													681621	0.998231	0.968035	0.983278	1.0141	0.925075	0.953155	0.925476	0.969777	0.907608	0.939917		681621	0.958465	0.0344371	0.01089
691621	58714	97988	72271	51302	68338	71101	46393	54781	59397	70906													691621	0.999337	0.967078	0.984163	1.01604	0.923763	0.954028	0.926774	0.970361	0.907104	0.940355		691621	0.9589	0.035045	0.0110822
701621	58779	97988	72402	51334	68143	71101	46425	54781	59300	70971													701621	1.00044	0.967078	0.985947	1.01667	0.921128	0.954028	0.927414	0.970361	0.905623	0.941217		701621	0.958991	0.0358796	0.0113461
711621	58812	97955	72434	51464	68078	71134	46393	54813	59202	71036													711621	1.00101	0.966752	0.986382	1.01925	0.920249	0.95447	0.926774	0.970928	0.904126	0.942079		711621	0.959201	0.0368237	0.0116447
721621	59007	97955	72564	51497	67882	71199	46393	54846	59105	71004													721621	1.00432	0.966752	0.988153	1.0199	0.917599	0.955343	0.926774	0.971513	0.902645	0.941654		721621	0.959466	0.0381081	0.0120508
731621	59072	97923	72564	51594	67687	71166	46458	54846	59072	71036													731621	1.00543	0.966436	0.988153	1.02182	0.914964	0.9549	0.928073	0.971513	0.902141	0.942079		731621	0.959551	0.0388626	0.0122894
741621	59105	97825	72662	51627	67525	71199	46425	54878	58974	71069													741621	1.00599	0.965469	0.989487	1.02247	0.912774	0.955343	0.927414	0.972079	0.900644	0.942516		741621	0.959419	0.0397253	0.0125622
751621	59202	97793	72662	51692	67395	71199	46393	54846	58909	71069													751621	1.00764	0.965153	0.989487	1.02376	0.911016	0.955343	0.926774	0.971513	0.899651	0.942516		751621	0.959286	0.0405949	0.0128372
761621	59267	97858	72727	51725	67265	71231	46425	54911	58844	71069													761621	1.00875	0.965795	0.990372	1.02441	0.909259	0.955772	0.927414	0.972664	0.898659	0.942516		761621	0.959561	0.041316	0.0130653
771621	59332	97728	72792	51790	67070	71264	46425	54943	58714	71069													771621	1.00986	0.964512	0.991257	1.0257	0.906623	0.956215	0.927414	0.973231	0.896673	0.942516		771621	0.9594	0.0424427	0.0134216
781621	59397	97728	72824	51887	66972	71264	46425	54911	58682	71036													781621	1.01096	0.964512	0.991693	1.02762	0.905299	0.956215	0.927414	0.972664	0.896185	0.942079		781621	0.959464	0.0432234	0.0136684
791621	59495	97728	72792	51887	66777	71231	46360	54943	58649	70971													791621	1.01263	0.964512	0.991257	1.02762	0.902663	0.955772	0.926115	0.973231	0.895681	0.941217		791621	0.95907	0.0440329	0.0139244
801621	59527	97695	72857	51887	66680	71264	46360	54943	58519	70939													801621	1.01317	0.964186	0.992143	1.02762	0.901351	0.956215	0.926115	0.973231	0.893695	0.940792		801621	0.958853	0.044697	0.0141344
811621	59592	97663	72857	51855	66550	71361	46360	54976	58389	70939													811621	1.01428	0.96387	0.992143	1.02699	0.899594	0.957516	0.926115	0.973815	0.89171	0.940792		811621	0.958683	0.0453276	0.0143339
821621	59690	97630	72824	51887	66517	71264	46360	55008	58357	70906													821621	1.01595	0.963545	0.991693	1.02762	0.899148	0.956215	0.926115	0.974382	0.891221	0.940355		821621	0.958625	0.0458137	0.0144876
831621	59755	97598	72857	51855	66387	71329	46360	55008	58259	70808													831621	1.01706	0.963229	0.992143	1.02699	0.897391	0.957087	0.926115	0.974382	0.889725	0.939055		831621	0.958317	0.0464506	0.014689
841621	59755	97565	72792	51920	66387	71361	46328	54976	58194	70841													841621	1.01706	0.962903	0.991257	1.02828	0.897391	0.957516	0.925476	0.973815	0.888732	0.939492		841621	0.958192	0.0467598	0.0147868
851621	59820	97565	72759	51822	66322	71296	46295	54976	58097	70776													851621	1.01816	0.962903	0.990808	1.02634	0.896512	0.956644	0.924817	0.973815	0.887251	0.93863		851621	0.957588	0.0470253	0.0148707
861621	59820	97533	72662	51855	66257	71329	46295	55008	58064	70646													861621	1.01816	0.962587	0.989487	1.02699	0.895633	0.957087	0.924817	0.974382	0.886747	0.936906		861621	0.95728	0.0473382	0.0149697
871621	59885	97500	72597	51855	66224	71361	46295	55008	57967	70646													871621	1.01927	0.962261	0.988602	1.02699	0.895187	0.957516	0.924817	0.974382	0.885265	0.936906		871621	0.95712	0.0477385	0.0150962
881621	59885	97500	72532	51790	66224	71394	46263	55008	57804	70613													881621	1.01927	0.962261	0.987717	1.0257	0.895187	0.957959	0.924177	0.974382	0.882776	0.936469		881621	0.95659	0.0479569	0.0151653
891621	59885	97467	72467	51822	66159	71361	46230	55008	57837	70483													891621	1.01927	0.961936	0.986832	1.02634	0.894309	0.957516	0.923518	0.974382	0.88328	0.934745		891621	0.956212	0.0481623	0.0152302
901621	59852	97435	72402	51757	66192	71361	46230	55041	57804	70548													901621	1.01871	0.96162	0.985947	1.02505	0.894755	0.957516	0.923518	0.974967	0.882776	0.935607		901621	0.956046	0.047812	0.0151195
911621	59820	97402	72304	51757	66224	71394	46198	55008	57739	70451													911621	1.01816	0.961294	0.984612	1.02505	0.895187	0.957959	0.922879	0.974382	0.881783	0.93432		911621	0.955563	0.0478326	0.015126
921621	59820	97467	72174	51692	66224	71361	46198	55073	57674	70418													921621	1.01816	0.961936	0.982842	1.02376	0.895187	0.957516	0.922879	0.975533	0.880791	0.933883		921621	0.955249	0.0477614	0.0151035
931621	59787	97370	72109	51692	66257	71459	46133	55073	57642	70288													931621	1.0176	0.960978	0.981957	1.02376	0.895633	0.958831	0.92158	0.975533	0.880302	0.932159		931621	0.954834	0.0478285	0.0151247
941621	59755	97370	72044	51692	66224	71361	46100	55073	57609	70321													941621	1.01706	0.960978	0.981071	1.02376	0.895187	0.957516	0.920921	0.975533	0.879798	0.932596		941621	0.954442	0.0478603	0.0151348
951621	59787	97370	72011	51627	66224	71426	46133	55041	57544	70321													951621	1.0176	0.960978	0.980622	1.02247	0.895187	0.958388	0.92158	0.974967	0.878805	0.932596		951621	0.95432	0.0478089	0.0151185
961621	59657	97402	71979	51594	66159	71394	46068	55073	57544	70256													961621	1.01539	0.961294	0.980186	1.02182	0.894309	0.957959	0.920282	0.975533	0.878805	0.931734		961621	0.953731	0.047651	0.0150686
971621	59657	97402	71914	51562	66192	71361	45970	55041	57544	70191													971621	1.01539	0.961294	0.979301	1.02119	0.894755	0.957516	0.918324	0.974967	0.878805	0.930872		971621	0.953241	0.0476024	0.0150532
981621	59592	97337	71849	51529	66159	71361	46003	54976	57511	70191													981621	1.01428	0.960653	0.978416	1.02053	0.894309	0.957516	0.918983	0.973815	0.878301	0.930872		981621	0.952768	0.0473111	0.0149611
991621	59527	97337	71816	51464	66094	71329	45970	54976	57544	70126													991621	1.01317	0.960653	0.977967	1.01925	0.89343	0.957087	0.918324	0.973815	0.878805	0.93001		991621	0.952251	0.0470462	0.0148773
1001621	59430	97337	71751	51399	66062	71264	45938	54976	57511	70061													1001621	1.01152	0.960653	0.977081	1.01796	0.892998	0.956215	0.917685	0.973815	0.878301	0.929148		1001621	0.951538	0.0467874	0.0147955
1011621	59365	97337	71784	51367	66127	71264	45905	54911	57446	69963													1011621	1.01042	0.960653	0.977531	1.01732	0.893876	0.956215	0.917026	0.972664	0.877309	0.927848		1011621	0.951086	0.0466746	0.0147598
1021621	59300	97240	71751	51302	65997	71199	45873	54911	57511	69963													1021621	1.00931	0.959695	0.977081	1.01604	0.892119	0.955343	0.916387	0.972664	0.878301	0.927848		1021621	0.950479	0.0463771	0.0146657
1031621	59235	97305	71751	51302	65997	71199	45873	54878	57479	69833													1031621	1.0082	0.960337	0.977081	1.01604	0.892119	0.955343	0.916387	0.972079	0.877813	0.926124		1031621	0.950152	0.0463872	0.0146689
1041621	59202	97305	71719	51269	65997	71166	45808	54846	57479	69801													1041621	1.00764	0.960337	0.976646	1.01538	0.892119	0.9549	0.915088	0.971513	0.877813	0.9257		1041621	0.949714	0.0462735	0.014633
1051621	59137	97272	71719	51204	65997	71166	45808	54846	57479	69703													1051621	1.00654	0.960011	0.976646	1.0141	0.892119	0.9549	0.915088	0.971513	0.877813	0.9244		1051621	0.949312	0.0459861	0.0145421
1061621	59105	97207	71719	51237	65932	71101	45742	54813	57479	69606													1061621	1.00599	0.95937	0.976646	1.01475	0.89124	0.954028	0.91377	0.970928	0.877813	0.923114		1061621	0.948765	0.0462645	0.0146301
1071621	59039	97240	71654	51172	65899	71036	45677	54846	57446	69573													1071621	1.00487	0.959695	0.975761	1.01346	0.890794	0.953155	0.912471	0.971513	0.877309	0.922676		1071621	0.948171	0.0461632	0.0145981
1081621	59007	97175	71686	51139	65932	71036	45645	54781	57479	69508													1081621	1.00432	0.959054	0.976196	1.01281	0.89124	0.953155	0.911832	0.970361	0.877813	0.921814		1081621	0.94786	0.045896	0.0145136
1091621	59007	97175	71719	51107	65899	71069	45677	54781	57479	69345													1091621	1.00432	0.959054	0.976646	1.01218	0.890794	0.953598	0.912471	0.970361	0.877813	0.919653		1091621	0.947689	0.0459815	0.0145406
1101621	58974	97175	71719	51009	65899	70971	45645	54683	57381	69280													1101621	1.00376	0.959054	0.976646	1.01023	0.890794	0.952283	0.911832	0.968625	0.876316	0.918791		1101621	0.946834	0.0458596	0.0145021
1111621	58942	97175	71719	51009	65834	70971	45580	54683	57381	69248													1111621	1.00322	0.959054	0.976646	1.01023	0.889916	0.952283	0.910533	0.968625	0.876316	0.918366		1111621	0.946519	0.0460447	0.0145606
1121621	58974	97077	71686	51009	65834	70939	45482	54618	57284	69085													1121621	1.00376	0.958087	0.976196	1.01023	0.889916	0.951854	0.908576	0.967474	0.874835	0.916204		1121621	0.945714	0.0465634	0.0147247
1131621	58942	96980	71784	50944	65802	70906	45482	54585	57349	69020													1131621	1.00322	0.957129	0.977531	1.00895	0.889483	0.951411	0.908576	0.966889	0.875827	0.915342		1131621	0.945435	0.0462788	0.0146347
1141621	58909	97045	71719	50977	65802	70939	45450	54585	57219	68890													1141621	1.00266	0.957771	0.976646	1.0096	0.889483	0.951854	0.907936	0.966889	0.873842	0.913618		1141621	0.94503	0.0467764	0.014792
1151621	58877	97012	71784	50977	65802	70906	45417	54553	57219	68825													1151621	1.00211	0.957445	0.977531	1.0096	0.889483	0.951411	0.907277	0.966322	0.873842	0.912756		1151621	0.944778	0.0468468	0.0148143
1161621	58877	96915	71816	50944	65737	70971	45385	54488	57219	68728													1161621	1.00211	0.956488	0.977967	1.00895	0.888604	0.952283	0.906638	0.965171	0.873842	0.91147		1161621	0.944352	0.0469814	0.0148568
1171621	58812	96915	71816	50879	65769	70939	45320	54423	57154	68533													1171621	1.00101	0.956488	0.977967	1.00766	0.889037	0.951854	0.905339	0.96402	0.872849	0.908884		1171621	0.94351	0.0470024	0.0148635
1181621	58844	96915	71784	50977	65737	71036	45222	54390	57121	68468													1181621	1.00155	0.956488	0.977531	1.0096	0.888604	0.953155	0.903382	0.963435	0.872345	0.908022		1181621	0.943411	0.0477274	0.0150927
1191621	58812	96785	71849	50944	65802	71004	45222	54358	57089	68370													1191621	1.00101	0.955205	0.978416	1.00895	0.889483	0.952726	0.903382	0.962868	0.871857	0.906722		1191621	0.943061	0.0476297	0.0150618
1201621	58714	96817	71914	50977	65769	71004	45190	54293	57056	68240													1201621	0.999337	0.955521	0.979301	1.0096	0.889037	0.952726	0.902743	0.961717	0.871353	0.904998		1201621	0.942633	0.0478862	0.015143
1211621	58747	96817	71881	50977	65737	71036	45190	54195	56991	68143													1211621	0.999899	0.955521	0.978852	1.0096	0.888604	0.953155	0.902743	0.959981	0.87036	0.903712		1211621	0.942243	0.0481903	0.0152391
1221621	58714	96720	71946	51009	65672	71134	45125	54195	56991	68110													1221621	0.999337	0.954563	0.979737	1.01023	0.887726	0.95447	0.901444	0.959981	0.87036	0.903274		1221621	0.942113	0.0485645	0.0153574
1231621	58682	96590	71979	51009	65639	71134	45060	54163	56926	67915													1231621	0.998792	0.95328	0.980186	1.01023	0.88728	0.95447	0.900146	0.959414	0.869367	0.900688		1231621	0.941386	0.0490466	0.0155099
1241621	58617	96622	71979	51042	65607	71134	45060	54098	56894	67915													1241621	0.997686	0.953596	0.980186	1.01089	0.886847	0.95447	0.900146	0.958263	0.868879	0.900688		1241621	0.941165	0.0491022	0.0155275
1251621	58617	96557	72011	51107	65574	71166	44962	54098	56796	67752													1251621	0.997686	0.952955	0.980622	1.01218	0.886401	0.9549	0.898188	0.958263	0.867382	0.898526		1251621	0.94071	0.0500222	0.0158184
1261621	58519	96460	72044	51139	65574	71199	45027	54033	56796	67655													1261621	0.996018	0.951997	0.981071	1.01281	0.886401	0.955343	0.899486	0.957111	0.867382	0.89724		1261621	0.940486	0.049902	0.0157804
1271621	58487	96427	72141	51204	65542	71199	44930	54000	56764	67492													1271621	0.995473	0.951672	0.982392	1.0141	0.885968	0.955343	0.897549	0.956527	0.866893	0.895078		1271621	0.940099	0.0506551	0.0160186
1281621	58389	96330	72109	51237	65509	71231	44897	53935	56731	67492													1281621	0.993805	0.950714	0.981957	1.01475	0.885522	0.955772	0.896889	0.955376	0.866389	0.895078		1281621	0.939625	0.0506671	0.0160223
1291621	58324	96297	72141	51237	65509	71296	44832	53870	56666	67395													1291621	0.992699	0.950389	0.982392	1.01475	0.885522	0.956644	0.895591	0.954224	0.865397	0.893792		1291621	0.93914	0.0509713	0.0161185
1301621	58259	96265	72174	51302	65509	71296	44832	53903	56634	67330													1301621	0.991593	0.950073	0.982842	1.01604	0.885522	0.956644	0.895591	0.954809	0.864908	0.89293		1301621	0.939095	0.0512759	0.0162149
1311621	58227	96200	72206	51399	65444	71264	44832	53805	56634	67330													1311621	0.991048	0.949431	0.983278	1.01796	0.884644	0.956215	0.895591	0.953073	0.864908	0.89293		1311621	0.938907	0.0515947	0.0163157
1321621	58194	96135	72206	51432	65477	71329	44735	53805	56569	67297													1321621	0.990486	0.94879	0.983278	1.01861	0.88509	0.957087	0.893653	0.953073	0.863915	0.892492		1321621	0.938648	0.0519963	0.0164427
1331621	58097	96102	72206	51464	65379	71361	44767	53708	56536	67265													1331621	0.988835	0.948464	0.983278	1.01925	0.883765	0.957516	0.894292	0.951355	0.863411	0.892068		1331621	0.938223	0.0520987	0.0164751
1341621	57999	95972	72239	51497	65314	71394	44670	53675	56536	67232													1341621	0.987167	0.947181	0.983727	1.0199	0.882886	0.957959	0.892355	0.95077	0.863411	0.89163		1341621	0.937699	0.0523826	0.0165648
1351621	57902	95972	72239	51497	65249	71426	44637	53610	56504	67362													1351621	0.985516	0.947181	0.983727	1.0199	0.882008	0.958388	0.891695	0.949619	0.862922	0.893354		1351621	0.937431	0.0522783	0.0165318
1361621	57804	95907	72239	51562	65184	71426	44605	53578	56504	67395													1361621	0.983848	0.94654	0.983727	1.02119	0.881129	0.958388	0.891056	0.949052	0.862922	0.893792		1361621	0.937164	0.052436	0.0165817
1371621	57772	95939	72206	51562	65087	71491	44572	53578	56536	67427													1371621	0.983304	0.946855	0.983278	1.02119	0.879818	0.959261	0.890397	0.949052	0.863411	0.894216		1371621	0.937078	0.0524916	0.0165993
1381621	57674	95809	72206	51659	65054	71524	44572	53448	56536	67492													1381621	0.981636	0.945572	0.983278	1.02311	0.879372	0.959703	0.890397	0.946749	0.863411	0.895078		1381621	0.93683	0.0525968	0.0166326
1391621	57544	95777	72174	51659	64924	71556	44507	53415	56536	67557													1391621	0.979423	0.945257	0.982842	1.02311	0.877615	0.960133	0.889098	0.946165	0.863411	0.89594		1391621	0.936299	0.0526208	0.0166402
1401621	57446	95744	72206	51725	64924	71556	44475	53415	56569	67557													1401621	0.977755	0.944931	0.983278	1.02441	0.877615	0.960133	0.888459	0.946165	0.863915	0.89594		1401621	0.93626	0.0527369	0.0166769
1411621	57381	95712	72141	51725	64891	71491	44475	53285	56504	67622													1411621	0.976649	0.944615	0.982392	1.02441	0.877168	0.959261	0.888459	0.943862	0.862922	0.896802		1411621	0.935655	0.0525946	0.0166319
1421621	57284	95712	72141	51757	64826	71524	44442	53285	56536	67687													1421621	0.974998	0.944615	0.982392	1.02505	0.87629	0.959703	0.8878	0.943862	0.863411	0.897664		1421621	0.935578	0.0526267	0.016642
1431621	57154	95647	72109	51790	64794	71524	44507	53285	56601	67720													1431621	0.972785	0.943974	0.981957	1.0257	0.875857	0.959703	0.889098	0.943862	0.864404	0.898102		1431621	0.935544	0.0522558	0.0165247
1441621	57154	95647	72141	51822	64729	71524	44507	53220	56666	67785													1441621	0.972785	0.943974	0.982392	1.02634	0.874979	0.959703	0.889098	0.94271	0.865397	0.898964		1441621	0.935634	0.0522972	0.0165378
1451621	57056	95614	72109	51757	64761	71491	44507	53188	56601	67785													1451621	0.971117	0.943648	0.981957	1.02505	0.875411	0.959261	0.889098	0.942144	0.864404	0.898964		1451621	0.935105	0.0519322	0.0164224
1461621	56991	95582	72076	51855	64696	71491	44540	53122	56634	67882													1461621	0.970011	0.943332	0.981507	1.02699	0.874533	0.959261	0.889758	0.940975	0.864908	0.90025		1461621	0.935152	0.052034	0.0164546
1471621	56926	95549	72109	51887	64664	71459	44572	53090	56699	67817													1471621	0.968905	0.943006	0.981957	1.02762	0.8741	0.958831	0.890397	0.940408	0.865901	0.899388		1471621	0.935052	0.0519999	0.0164438
1481621	56829	95549	72141	51855	64599	71426	44572	53057	56731	67850													1481621	0.967254	0.943006	0.982392	1.02699	0.873221	0.958388	0.890397	0.939823	0.866389	0.899826		1481621	0.934769	0.0517826	0.0163751
1491621	56796	95484	72109	51920	64534	71361	44572	52992	56731	67817													1491621	0.966692	0.942365	0.981957	1.02828	0.872343	0.957516	0.890397	0.938672	0.866389	0.899388		1491621	0.9344	0.0520384	0.016456
1501621	56731	95484	72141	51887	64469	71264	44605	52960	56796	67882													1501621	0.965586	0.942365	0.982392	1.02762	0.871464	0.956215	0.891056	0.938105	0.867382	0.90025		1501621	0.934244	0.0516575	0.0163355
1511621	56666	95419	72109	51920	64436	71231	44637	52960	56829	67785													1511621	0.964479	0.941723	0.981957	1.02828	0.871018	0.955772	0.891695	0.938105	0.867886	0.898964		1511621	0.933988	0.051664	0.0163376
1521621	56666	95452	72109	51952	64371	71134	44702	52927	56861	67752													1521621	0.964479	0.942049	0.981957	1.02891	0.870139	0.95447	0.892994	0.93752	0.868375	0.898526		1521621	0.933942	0.0517019	0.0163496
1531621	56634	95354	72109	51952	64274	71101	44735	52895	56926	67752													1531621	0.963935	0.941082	0.981957	1.02891	0.868828	0.954028	0.893653	0.936954	0.869367	0.898526		1531621	0.933724	0.051612	0.0163211
1541621	56601	95387	72109	51985	64209	71036	44735	52895	56894	67687													1541621	0.963373	0.941408	0.981957	1.02956	0.867949	0.953155	0.893653	0.936954	0.868879	0.897664		1541621	0.933456	0.0519341	0.016423
1551621	56536	95387	72141	52017	64176	71004	44735	52830	56991	67655													1551621	0.962267	0.941408	0.982392	1.0302	0.867503	0.952726	0.893653	0.935802	0.87036	0.89724		1551621	0.933355	0.0519086	0.0164149
1561621	56569	95387	72141	51985	64111	70939	44735	52830	56959	67557													1561621	0.962828	0.941408	0.982392	1.02956	0.866625	0.951854	0.893653	0.935802	0.869871	0.89594		1561621	0.932994	0.0520689	0.0164656
1571621	56504	95289	72109	51985	64046	70841	44735	52797	57024	67525													1571621	0.961722	0.94044	0.981957	1.02956	0.865746	0.950539	0.893653	0.935218	0.870864	0.895516		1571621	0.932522	0.0519072	0.0164145
1581621	56504	95224	72174	52017	63916	70808	44767	52797	57056	67460													1581621	0.961722	0.939799	0.982842	1.0302	0.863989	0.950096	0.894292	0.935218	0.871353	0.894654		1581621	0.932416	0.0523113	0.0165423
1591621	56569	95257	72174	52017	63819	70743	44832	52797	57024	67362													1591621	0.962828	0.940125	0.982842	1.0302	0.862678	0.949224	0.895591	0.935218	0.870864	0.893354		1591621	0.932292	0.0526124	0.0166375
1601621	56536	95192	72174	52082	63754	70678	44832	52797	57024	67330													1601621	0.962267	0.939483	0.982842	1.03149	0.861799	0.948352	0.895591	0.935218	0.870864	0.89293		1601621	0.932083	0.0529673	0.0167497
1611621	56601	95192	72206	52017	63624	70646	44865	52797	57056	67330													1611621	0.963373	0.939483	0.983278	1.0302	0.860042	0.947922	0.89625	0.935218	0.871353	0.89293		1611621	0.932005	0.0529539	0.0167455
1621621	56601	95192	72271	52082	63526	70548	44865	52830	57089	67200													1621621	0.963373	0.939483	0.984163	1.03149	0.858717	0.946608	0.89625	0.935802	0.871857	0.891206		1621621	0.931894	0.053558	0.0169365
1631621	56634	95192	72304	52082	63493	70516	44930	52765	57024	67167													1631621	0.963935	0.939483	0.984612	1.03149	0.858271	0.946178	0.897549	0.934651	0.870864	0.890768		1631621	0.93178	0.053758	0.0169998
1641621	56666	95159	72304	52082	63363	70451	44995	52765	57024	67167													1641621	0.964479	0.939157	0.984612	1.03149	0.856514	0.945306	0.898847	0.934651	0.870864	0.890768		1641621	0.931668	0.0539439	0.0170585
1651621	56731	95192	72369	52050	63266	70418	44995	52765	57056	67167													1651621	0.965586	0.939483	0.985497	1.03085	0.855202	0.944863	0.898847	0.934651	0.871353	0.890768		1651621	0.93171	0.0541237	0.0171154
1661621	56666	95127	72467	52082	63201	70386	45060	52732	57056	67167													1661621	0.964479	0.938842	0.986832	1.03149	0.854324	0.944434	0.900146	0.934066	0.871353	0.890768		1661621	0.931673	0.0543546	0.0171884
1671621	56666	95159	72402	52017	63168	70288	45060	52700	57056	67102													1671621	0.964479	0.939157	0.985947	1.0302	0.853878	0.943119	0.900146	0.933499	0.871353	0.889906		1671621	0.931168	0.0541048	0.0171094
1681621	56666	95159	72532	52017	63103	70223	45092	52732	57024	67070													1681621	0.964479	0.939157	0.987717	1.0302	0.852999	0.942247	0.900785	0.934066	0.870864	0.889482		1681621	0.931199	0.0544846	0.0172296
1691621	56666	95192	72597	51952	63006	70126	45027	52667	57089	67102													1691621	0.964479	0.939483	0.988602	1.02891	0.851688	0.940945	0.899486	0.932915	0.871857	0.889906		1691621	0.930827	0.0544363	0.0172143
1701621	56634	95159	72662	51952	63006	70093	45125	52700	57089	67070													1701621	0.963935	0.939157	0.989487	1.02891	0.851688	0.940502	0.901444	0.933499	0.871857	0.889482		1701621	0.930996	0.0544066	0.0172049
1711621	56666	95257	72727	51920	62973	69996	45092	52635	57024	67070													1711621	0.964479	0.940125	0.990372	1.02828	0.851242	0.939201	0.900785	0.932348	0.870864	0.889482		1711621	0.930717	0.054645	0.0172803
1721621	56569	95159	72857	51887	62973	69931	45125	52602	57121	67070													1721621	0.962828	0.939157	0.992143	1.02762	0.851242	0.938329	0.901444	0.931764	0.872345	0.889482		1721621	0.930636	0.0543713	0.0171937
1731621	56569	95192	72857	51887	62941	69833	45157	52602	57154	67135													1731621	0.962828	0.939483	0.992143	1.02762	0.850809	0.937014	0.902083	0.931764	0.872849	0.890344		1731621	0.930694	0.0542591	0.0171582
1741621	56601	95224	73019	51887	62941	69768	45190	52570	57121	67135													1741621	0.963373	0.939799	0.994349	1.02762	0.850809	0.936142	0.902743	0.931197	0.872345	0.890344		1741621	0.930872	0.0545927	0.0172637
1751621	56569	95159	73084	51855	62843	69703	45125	52505	57186	67135													1751621	0.962828	0.939157	0.995234	1.02699	0.849484	0.935269	0.901444	0.930045	0.873338	0.890344		1751621	0.930413	0.0547027	0.0172985
1761621	56569	95192	73182	51855	62778	69573	45157	52505	57186	67102													1761621	0.962828	0.939483	0.996568	1.02699	0.848606	0.933525	0.902083	0.930045	0.873338	0.889906		1761621	0.930337	0.0550149	0.0173972
1771621	56601	95224	73279	51855	62876	69508	45157	52505	57251	67102													1771621	0.963373	0.939799	0.997889	1.02699	0.849931	0.932653	0.902083	0.930045	0.874331	0.889906		1771621	0.9307	0.0548988	0.0173605
1781621	56601	95224	73344	51790	62843	69443	45092	52440	57316	67102													1781621	0.963373	0.939799	0.998774	1.0257	0.849484	0.931781	0.900785	0.928894	0.875323	0.889906		1781621	0.930382	0.0548076	0.0173317
1791621	56634	95159	73344	51822	62908	69410	45060	52440	57349	67070													1791621	0.963935	0.939157	0.998774	1.02634	0.850363	0.931338	0.900146	0.928894	0.875827	0.889482		1791621	0.930425	0.05483	0.0173388
1801621	56699	95192	73442	51757	62908	69345	45060	52407	57349	67070													1801621	0.965041	0.939483	1.00011	1.02505	0.850363	0.930466	0.900146	0.928309	0.875827	0.889482		1801621	0.930427	0.0548516	0.0173456
1811621	56666	95127	73409	51692	62876	69313	45027	52375	57349	67037													1811621	0.964479	0.938842	0.99966	1.02376	0.849931	0.930036	0.899486	0.927743	0.875827	0.889044		1811621	0.929881	0.0546401	0.0172787
1821621	56764	95159	73539	51692	62876	69313	45027	52375	57414	67005													1821621	0.966147	0.939157	1.00143	1.02376	0.849931	0.930036	0.899486	0.927743	0.87682	0.88862		1821621	0.930313	0.0549451	0.0173752
1831621	56796	95127	73539	51659	62908	69248	44995	52342	57446	66907													1831621	0.966692	0.938842	1.00143	1.02311	0.850363	0.929164	0.898847	0.927158	0.877309	0.88732		1831621	0.930023	0.0548888	0.0173574
1841621	56829	95127	73507	51627	63006	69313	45027	52375	57511	66907													1841621	0.967254	0.938842	1.00099	1.02247	0.851688	0.930036	0.899486	0.927743	0.878301	0.88732		1841621	0.930414	0.0543847	0.0171979
1851621	56829	95062	73539	51594	63006	69248	45027	52277	57576	66810													1851621	0.967254	0.9382	1.00143	1.02182	0.851688	0.929164	0.899486	0.926007	0.879294	0.886033		1851621	0.930038	0.0543374	0.017183
1861621	56829	95029	73604	51562	63071	69280	45060	52310	57609	66810													1861621	0.967254	0.937874	1.00232	1.02119	0.852566	0.929594	0.900146	0.926591	0.879798	0.886033		1861621	0.930336	0.0541043	0.0171093
1871621	56894	95029	73669	51529	63103	69313	45060	52310	57674	66777													1871621	0.96836	0.937874	1.0032	1.02053	0.852999	0.930036	0.900146	0.926591	0.880791	0.885596		1871621	0.930613	0.0540674	0.0170976
1881621	56926	95062	73734	51497	63103	69313	45060	52310	57707	66647													1881621	0.968905	0.9382	1.00409	1.0199	0.852999	0.930036	0.900146	0.926591	0.881295	0.883872		1881621	0.930603	0.054242	0.0171528
1891621	57024	95029	73734	51464	63136	69345	45125	52277	57739	66680													1891621	0.970573	0.937874	1.00409	1.01925	0.853445	0.930466	0.901444	0.926007	0.881783	0.884309		1891621	0.930923	0.0540142	0.0170808
1901621	57089	95062	73734	51497	63168	69345	45125	52310	57804	66615													1901621	0.971679	0.9382	1.00409	1.0199	0.853878	0.930466	0.901444	0.926591	0.882776	0.883447		1901621	0.931247	0.0541382	0.01712
1911621	57089	95029	73799	51432	63168	69410	45157	52310	57804	66550													1911621	0.971679	0.937874	1.00497	1.01861	0.853878	0.931338	0.902083	0.926591	0.882776	0.882585		1911621	0.931239	0.0540803	0.0171017
1921621	57154	95062	73799	51399	63168	69443	45222	52245	57869	66485													1921621	0.972785	0.9382	1.00497	1.01796	0.853878	0.931781	0.903382	0.92544	0.883769	0.881723		1921621	0.931389	0.0539865	0.017072
1931621	57219	95029	73864	51399	63233	69508	45287	52277	57934	66485													1931621	0.973891	0.937874	1.00586	1.01796	0.854756	0.932653	0.90468	0.926007	0.884761	0.881723		1931621	0.932016	0.0538944	0.0170429
1941621	57251	94997	73897	51367	63201	69573	45320	52277	57902	66485													1941621	0.974436	0.937559	1.0063	1.01732	0.854324	0.933525	0.905339	0.926007	0.884273	0.881723		1941621	0.932082	0.0539768	0.017069
1951621	57381	95094	73962	51334	63266	69606	45352	52245	57934	66452													1951621	0.976649	0.938516	1.00719	1.01667	0.855202	0.933968	0.905979	0.92544	0.884761	0.881286		1951621	0.932566	0.0540379	0.0170883
1961621	57381	95062	74027	51269	63266	69606	45417	52277	57999	66452													1961621	0.976649	0.9382	1.00808	1.01538	0.855202	0.933968	0.907277	0.926007	0.885754	0.881286		1961621	0.93278	0.0537749	0.0170051
1971621	57479	94997	74125	51269	63396	69703	45482	52277	57934	66419													1971621	0.978317	0.937559	1.00941	1.01538	0.85696	0.935269	0.908576	0.926007	0.884761	0.880848		1971621	0.933309	0.0539326	0.017055
1981621	57511	94997	74125	51237	63428	69671	45515	52245	57967	66452													1981621	0.978861	0.937559	1.00941	1.01475	0.857392	0.93484	0.909235	0.92544	0.885265	0.881286		1981621	0.933404	0.0536851	0.0169767
1991621	57576	94997	74255	51237	63493	69671	45580	52245	57967	66419													1991621	0.979968	0.937559	1.01118	1.01475	0.858271	0.93484	0.910533	0.92544	0.885265	0.880848		1991621	0.933865	0.0539162	0.0170498
2001621	57576	94997	74320	51172	63526	69671	45612	52245	57967	66419													2001621	0.979968	0.937559	1.01207	1.01346	0.858717	0.93484	0.911173	0.92544	0.885265	0.880848		2001621	0.933934	0.0537453	0.0169957

## Sheet: Fig3B Acetabularia
				Original data (arbitrary units)										Maxima											Normalized to maximum								Averaged data (shown in Fig. 3B)
Time (ms)	Acetabularia 1	Acetabularia 2	Acetabularia 3	Acetabularia 4	Acetabularia 5	Acetabularia 6	Acetabularia 7	Acetabularia 8	Acetabularia 9		max1	max2	max3	max4	max5	max6	max7	max8	max9		Time (ms)	Acetabularia 1	Acetabularia 2	Acetabularia 3	Acetabularia 4	Acetabularia 5	Acetabularia 6	Acetabularia 7	Acetabularia 8	Acetabularia 9		Time (ms)	Average	stdev	SE	n
11	227	227	227	227	227	260	199	260	260		29124.5	22075.6	32236.4	27558	36544.9	25059.1	9379.57	18428.5	39105.6		11	0.00779412	0.0102828	0.00704173	0.00823719	0.00621154	0.0103755	0.0212163	0.0141086	0.00664867		11	0.0102129	0.00480635	0.00160212	9
21	9883	8225	14012	9688	14792	9493	3708	7965	19734												21	0.339336	0.372583	0.434664	0.35155	0.404762	0.378824	0.395327	0.43221	0.504634		21	0.401543	0.0505447	0.0168482
31	10403	8615	14792	10175	15637	10013	3858	8452	20904												31	0.35719	0.39025	0.45886	0.369222	0.427885	0.399575	0.411319	0.458637	0.534553		31	0.423055	0.0547775	0.0182592
41	10598	8810	15085	10338	16027	10240	3988	8680	21327												41	0.363886	0.399083	0.46795	0.375137	0.438556	0.408633	0.425179	0.471009	0.54537		41	0.432756	0.0561846	0.0187282
51	10728	8908	15345	10501	16320	10436	4057	8875	21717												51	0.368349	0.403522	0.476015	0.381052	0.446574	0.416455	0.432536	0.48159	0.555343		51	0.44016	0.0580121	0.0193374
61	10891	9070	15637	10663	16613	10598	4107	9070	22139												61	0.373946	0.410861	0.485073	0.38693	0.454591	0.422919	0.437866	0.492172	0.566134		61	0.447833	0.0598425	0.0199475
71	11053	9200	15832	10826	16905	10793	4177	9265	22465												71	0.379508	0.416749	0.491122	0.392845	0.462582	0.430701	0.44533	0.502753	0.574471		71	0.455118	0.0608534	0.0202845
81	11216	9298	16092	10956	17230	10956	4237	9460	22822												81	0.385105	0.421189	0.499188	0.397562	0.471475	0.437206	0.451726	0.513335	0.5836		81	0.462265	0.0625947	0.0208649
91	11346	9493	16385	11118	17523	11151	4297	9655	23180												91	0.389569	0.430022	0.508277	0.403441	0.479492	0.444987	0.458123	0.523916	0.592754		91	0.470065	0.0640264	0.0213421
101	11541	9623	16613	11248	17848	11346	4356	9883	23537												101	0.396264	0.435911	0.515349	0.408158	0.488385	0.452769	0.464414	0.536288	0.601884		101	0.477714	0.0655726	0.0218575
111	11703	9720	16808	11411	18141	11508	4436	10078	23863												111	0.401826	0.440305	0.521398	0.414073	0.496403	0.459234	0.472943	0.54687	0.61022		111	0.484808	0.0668187	0.0222729
121	11899	9883	17133	11573	18433	11703	4486	10273	24188												121	0.408556	0.447688	0.53148	0.419951	0.504393	0.467015	0.478273	0.557451	0.618531		121	0.492593	0.0679458	0.0226486
131	12061	10013	17328	11671	18791	11899	4546	10468	24448												131	0.414118	0.453577	0.537529	0.423508	0.514189	0.474837	0.48467	0.568032	0.625179		131	0.499516	0.0690616	0.0230205
141	12224	10110	17620	11866	19083	12094	4626	10663	24870												141	0.419715	0.457971	0.546587	0.430584	0.522179	0.482618	0.4932	0.578614	0.635971		141	0.507493	0.070891	0.0236303
151	12419	10273	17816	12029	19376	12289	4695	10826	25196												151	0.42641	0.465355	0.552667	0.436498	0.530197	0.4904	0.500556	0.587459	0.644307		151	0.514872	0.0715099	0.0238366
161	12581	10403	18076	12191	19701	12484	4765	11053	25521												161	0.431973	0.471244	0.560733	0.442377	0.53909	0.498181	0.508019	0.599777	0.652618		161	0.522668	0.0730431	0.0243477
171	12776	10566	18368	12354	20026	12679	4845	11216	25813												171	0.438668	0.478628	0.569791	0.448292	0.547983	0.505963	0.516548	0.608622	0.660085		171	0.530509	0.0736745	0.0245582
181	12939	10663	18563	12549	20319	12874	4905	11411	26106												181	0.444265	0.483022	0.57584	0.455368	0.556001	0.513745	0.522945	0.619203	0.667578		181	0.537552	0.0746579	0.024886
191	13134	10826	18856	12679	20611	13069	4965	11541	26398												191	0.45096	0.490405	0.584929	0.460085	0.563991	0.521526	0.529342	0.626257	0.675044		191	0.544727	0.0752492	0.0250831
201	13297	10988	19018	12874	20904	13264	5024	11768	26756												201	0.456557	0.497744	0.589955	0.467161	0.572009	0.529308	0.535632	0.638575	0.684199		201	0.552349	0.0765223	0.0255074
211	13459	11118	19311	13036	21262	13394	5094	11931	27016												211	0.462119	0.503633	0.599044	0.473039	0.581805	0.534496	0.543095	0.64742	0.690848		211	0.5595	0.0774737	0.0258246
221	13719	11281	19539	13199	21489	13687	5174	12094	27276												221	0.471046	0.511016	0.606116	0.478954	0.588016	0.546188	0.551624	0.656265	0.697497		221	0.567414	0.0772421	0.0257474
231	13849	11443	19734	13329	21814	13817	5234	12256	27569												231	0.47551	0.518355	0.612165	0.483672	0.596909	0.551376	0.558021	0.665056	0.704989		231	0.574006	0.0783852	0.0261284
241	14044	11541	20026	13524	22107	14012	5314	12419	27829												241	0.482205	0.522794	0.621224	0.490748	0.604927	0.559157	0.56655	0.673901	0.711638		241	0.58146	0.0789502	0.0263167
251	14239	11736	20221	13687	22302	14239	5343	12581	28056												251	0.488901	0.531627	0.627273	0.496662	0.610263	0.568216	0.569642	0.682692	0.717443		251	0.58808	0.0789219	0.0263073
261	14402	11834	20384	13882	22660	14434	5433	12744	28349												261	0.494497	0.536067	0.632329	0.503738	0.620059	0.575997	0.579238	0.691537	0.724935		261	0.595377	0.0796357	0.0265452
271	14564	11931	20644	14044	22920	14597	5473	12874	28577												271	0.50006	0.54046	0.640394	0.509617	0.627174	0.582502	0.583502	0.698591	0.730765		271	0.601452	0.0801962	0.0267321
281	14792	12094	20872	14207	23180	14759	5503	13036	28804												281	0.507888	0.547844	0.647467	0.515532	0.634288	0.588967	0.586701	0.707382	0.73657		281	0.608071	0.080361	0.026787
291	14987	12289	21099	14369	23440	14922	5613	13134	29064												291	0.514584	0.556677	0.654509	0.52141	0.641403	0.595471	0.598428	0.7127	0.743219		291	0.615378	0.0799547	0.0266516
301	15150	12386	21294	14564	23733	15117	5682	13329	29259												301	0.52018	0.561071	0.660558	0.528486	0.64942	0.603253	0.605785	0.723281	0.748205		301	0.622249	0.0805159	0.0268386
311	15312	12549	21522	14727	23928	15280	5732	13394	29487												311	0.525743	0.568455	0.667631	0.534401	0.654756	0.609757	0.611115	0.726808	0.754036		311	0.628078	0.08009	0.0266967
321	15507	12646	21684	14890	24188	15507	5812	13622	29715												321	0.532438	0.572849	0.672656	0.540316	0.661871	0.618816	0.619645	0.73918	0.759866		321	0.635293	0.0809543	0.0269848
331	15702	12776	21879	15020	24415	15670	5852	13687	29910												331	0.539133	0.578738	0.678705	0.545033	0.668082	0.625321	0.623909	0.742707	0.764853		331	0.64072	0.0804978	0.0268326
341	15897	12906	22074	15182	24643	15832	5952	13784	30105												341	0.545829	0.584627	0.684754	0.550912	0.674321	0.631785	0.634571	0.747971	0.769839		341	0.647179	0.0800009	0.026667
351	16092	13036	22302	15345	24870	15962	5991	13914	30300												351	0.552524	0.590516	0.691827	0.556827	0.680533	0.636973	0.638729	0.755025	0.774826		351	0.653087	0.0800201	0.0266734
361	16255	13199	22465	15507	25131	16125	6041	14044	30462												361	0.558121	0.597899	0.696883	0.562705	0.687675	0.643478	0.644059	0.762079	0.778968		361	0.659096	0.0797824	0.0265941
371	16418	13329	22660	15637	25293	16320	6091	14142	30657												371	0.563717	0.603788	0.702933	0.567422	0.692107	0.651259	0.64939	0.767397	0.783955		371	0.664663	0.079661	0.0265537
381	16580	13427	22855	15832	25553	16483	6151	14272	30820												381	0.56928	0.608228	0.708982	0.574498	0.699222	0.657764	0.655787	0.774452	0.788123		381	0.670704	0.0795809	0.026527
391	16743	13589	23017	16027	25748	16580	6211	14369	31015												391	0.574876	0.615566	0.714007	0.581574	0.704558	0.661635	0.662184	0.779715	0.793109		391	0.676358	0.0789953	0.0263318
401	16905	13719	23180	16157	25911	16775	6261	14467	31210												401	0.580439	0.621455	0.719063	0.586292	0.709018	0.669416	0.667515	0.785033	0.798096		401	0.681814	0.0788243	0.0262748
411	17003	13817	23310	16320	26138	16873	6281	14564	31373												411	0.583804	0.625894	0.723096	0.592207	0.71523	0.673327	0.669647	0.790297	0.802264		411	0.686196	0.0789837	0.0263279
421	17230	13979	23505	16450	26366	17100	6380	14662	31503												421	0.591598	0.633233	0.729145	0.596924	0.721469	0.682386	0.680202	0.795614	0.805589		421	0.692906	0.07801	0.0260033
431	17425	14077	23668	16613	26561	17230	6430	14694	31698												431	0.598293	0.637672	0.734202	0.602839	0.726804	0.687573	0.685532	0.797351	0.810575		431	0.697871	0.0771238	0.0257079
441	17523	14174	23830	16775	26724	17360	6470	14825	31828												441	0.601658	0.642066	0.739227	0.608717	0.731265	0.692761	0.689797	0.804459	0.813899		441	0.70265	0.0773421	0.0257807
451	17718	14272	23960	16840	26886	17458	6510	14890	31958												451	0.608353	0.646505	0.74326	0.611076	0.735698	0.696672	0.694062	0.807987	0.817224		451	0.706759	0.0769348	0.0256449
461	17848	14434	24123	17068	27049	17620	6580	15020	32120												461	0.612817	0.653843	0.748316	0.619349	0.740158	0.703137	0.701525	0.815041	0.821366		461	0.712839	0.0763837	0.0254612
471	17946	14532	24253	17133	27211	17718	6630	15085	32250												471	0.616182	0.658283	0.752349	0.621708	0.744591	0.707047	0.706855	0.818568	0.824691		471	0.716697	0.0764999	0.0255
481	18206	14629	24415	17295	27406	17881	6679	15117	32380												481	0.625109	0.662677	0.757374	0.627587	0.749927	0.713552	0.712079	0.820304	0.828015		481	0.721847	0.0749373	0.0249791
491	18303	14759	24578	17425	27601	17946	6719	15247	32511												491	0.628439	0.668566	0.76243	0.632304	0.755263	0.716146	0.716344	0.827359	0.831365		491	0.726468	0.0752852	0.0250951
501	18401	14857	24740	17588	27731	18141	6759	15312	32673												501	0.631804	0.673005	0.767456	0.638219	0.75882	0.723927	0.720609	0.830886	0.835508		501	0.731137	0.0749762	0.0249921
511	18563	15020	24805	17685	27894	18238	6789	15377	32771												511	0.637367	0.680389	0.769472	0.641739	0.76328	0.727798	0.723807	0.834413	0.838014		511	0.735142	0.0740542	0.0246847
521	18693	15052	24968	17816	28024	18336	6819	15442	32933												521	0.64183	0.681838	0.774529	0.646492	0.766837	0.731709	0.727005	0.83794	0.842156		521	0.738926	0.0741044	0.0247015
531	18823	15215	25098	18011	28187	18466	6889	15540	32966												531	0.646294	0.689222	0.778561	0.653568	0.771298	0.736897	0.734469	0.843258	0.843		531	0.744063	0.0728519	0.024284
541	18986	15247	25228	18076	28317	18563	6939	15605	33161												541	0.65189	0.690671	0.782594	0.655927	0.774855	0.740768	0.739799	0.846785	0.847987		541	0.74792	0.0731388	0.0243796
551	19051	15377	25326	18238	28479	18693	6979	15637	33226												551	0.654122	0.69656	0.785634	0.661805	0.779288	0.745955	0.744064	0.848522	0.849649		551	0.751733	0.0721241	0.0240414
561	19214	15475	25423	18303	28577	18791	7008	15735	33388												561	0.659719	0.701	0.788643	0.664164	0.781969	0.749866	0.747156	0.853839	0.853791		561	0.755572	0.0722139	0.0240713
571	19344	15572	25586	18466	28772	18888	7028	15767	33421												571	0.664183	0.705394	0.7937	0.670079	0.787305	0.753737	0.749288	0.855576	0.854635		571	0.759322	0.0710372	0.0236791
581	19474	15670	25716	18563	28869	19018	7058	15832	33583												581	0.668646	0.709833	0.797732	0.673599	0.78996	0.758925	0.752486	0.859103	0.858778		581	0.763229	0.0708793	0.0236264
591	19571	15735	25781	18693	28967	19083	7138	15865	33648												591	0.671977	0.712777	0.799749	0.678316	0.792641	0.761518	0.761016	0.860894	0.86044		591	0.766592	0.0699784	0.0233261
601	19701	15832	25878	18823	29129	19214	7158	15962	33746												601	0.67644	0.717171	0.802758	0.683033	0.797074	0.766746	0.763148	0.866157	0.862946		601	0.770608	0.0696895	0.0232298
611	19864	15930	26041	18921	29259	19311	7188	15995	33843												611	0.682037	0.721611	0.807814	0.686589	0.800631	0.770617	0.766346	0.867948	0.865427		611	0.774336	0.0688741	0.022958
1021	23277	18563	28902	22237	32543	21944	8185	17295	36314												1021	0.799223	0.840882	0.896565	0.806918	0.890493	0.875688	0.872641	0.938491	0.928614		1021	0.872168	0.048844	0.0162813
1121	23830	18953	29357	22725	33031	22335	8374	17523	36672												1121	0.818211	0.858549	0.910679	0.824626	0.903847	0.891291	0.892791	0.950863	0.937769		1121	0.887625	0.0460718	0.0153573
1221	24318	19344	29747	23245	33486	22660	8474	17620	36997												1221	0.834966	0.876261	0.922777	0.843495	0.916297	0.904261	0.903453	0.956127	0.94608		1221	0.900413	0.0419407	0.0139802
1321	24740	19571	30007	23668	33778	22887	8564	17783	37257												1321	0.849456	0.886544	0.930843	0.858845	0.924288	0.913319	0.913048	0.964971	0.952729		1321	0.910449	0.0392704	0.0130901
1421	25098	19831	30300	23993	34071	23147	8653	17881	37485												1421	0.861748	0.898321	0.939932	0.870638	0.932305	0.923695	0.922537	0.970289	0.958559		1421	0.91978	0.036885	0.012295
1521	25456	20091	30527	24318	34396	23407	8713	17946	37615												1521	0.87404	0.910099	0.946974	0.882431	0.941198	0.93407	0.928934	0.973816	0.961883		1521	0.928161	0.0337778	0.0112593
1621	25748	20286	30722	24610	34591	23570	8803	18011	37810												1621	0.884066	0.918932	0.953023	0.893027	0.946534	0.940575	0.938529	0.977344	0.96687		1621	0.935433	0.0314693	0.0104898
1721	26008	20481	30885	24870	34721	23733	8863	18043	37940												1721	0.892993	0.927766	0.958079	0.902462	0.950091	0.947079	0.944926	0.97908	0.970194		1721	0.941408	0.0289236	0.00964121
1821	26268	20644	31015	25098	34981	23830	8933	18141	38037												1821	0.90192	0.935149	0.962112	0.910735	0.957206	0.95095	0.952389	0.984398	0.972675		1821	0.947504	0.0272039	0.00906797
1921	26496	20774	31145	25261	35144	23993	8973	18173	38167												1921	0.909749	0.941038	0.966144	0.91665	0.961666	0.957455	0.956654	0.986134	0.975999		1921	0.952388	0.025592	0.00853067
2021	26659	20839	31210	25456	35274	24058	9012	18238	38265												2021	0.915345	0.943983	0.968161	0.923726	0.965223	0.960049	0.960811	0.989661	0.978505		2021	0.956163	0.0243687	0.00812289
2121	26854	20969	31405	25651	35404	24188	9052	18238	38362												2121	0.922041	0.949871	0.97421	0.930802	0.968781	0.965237	0.965076	0.989661	0.980986		2121	0.960741	0.0224819	0.00749395
2221	26984	21099	31470	25748	35502	24285	9082	18238	38460												2221	0.926504	0.95576	0.976226	0.934322	0.971462	0.969107	0.968275	0.989661	0.983492		2221	0.963868	0.0213378	0.00711258
2321	27146	21164	31503	25943	35599	24318	9082	18303	38525												2321	0.932067	0.958705	0.97725	0.941398	0.974117	0.970424	0.968275	0.993189	0.985154		2321	0.966731	0.019775	0.00659168
2421	27276	21197	31568	26008	35664	24415	9112	18303	38558												2421	0.93653	0.9602	0.979266	0.943757	0.975895	0.974295	0.971473	0.993189	0.985998		2421	0.968956	0.0188084	0.00626946
2521	27439	21294	31633	26171	35729	24480	9152	18368	38590												2521	0.942127	0.964594	0.981283	0.949671	0.977674	0.976889	0.975738	0.996716	0.986816		2521	0.97239	0.0174322	0.00581074
2621	27569	21392	31730	26301	35827	24513	9162	18336	38688												2621	0.946591	0.969033	0.984292	0.954389	0.980356	0.978206	0.976804	0.994979	0.989322		2621	0.974886	0.0158124	0.00527079
2721	27666	21457	31763	26366	35924	24545	9172	18336	38688												2721	0.949921	0.971977	0.985315	0.956747	0.98301	0.979483	0.97787	0.994979	0.989322		2721	0.976514	0.0148063	0.00493542
2821	27699	21489	31795	26431	35989	24610	9212	18401	38753												2821	0.951054	0.973427	0.986308	0.959106	0.984788	0.982077	0.982134	0.998506	0.990984		2821	0.978709	0.0151549	0.00505162
2921	27796	21554	31828	26528	36022	24643	9192	18401	38785												2921	0.954385	0.976371	0.987332	0.962626	0.985691	0.983394	0.980002	0.998506	0.991802		2921	0.980012	0.0139222	0.00464073
3021	27959	21619	31860	26626	36087	24708	9242	18401	38818												3021	0.959981	0.979316	0.988324	0.966182	0.98747	0.985987	0.985333	0.998506	0.992646		3021	0.982639	0.0123556	0.00411855
3121	28024	21619	31925	26724	36087	24708	9212	18433	38850												3121	0.962213	0.979316	0.990341	0.969738	0.98747	0.985987	0.982134	1.00024	0.993465		3121	0.983434	0.0117803	0.00392678
3221	28089	21652	31958	26691	36119	24773	9242	18433	38850												3221	0.964445	0.980811	0.991364	0.968541	0.988346	0.988581	0.985333	1.00024	0.993465		3221	0.98457	0.0116078	0.00386928
3321	28154	21717	31990	26789	36152	24773	9262	18433	38915												3321	0.966677	0.983755	0.992357	0.972097	0.989249	0.988581	0.987465	1.00024	0.995127		3321	0.986172	0.0107086	0.00356953
3421	28219	21684	32023	26821	36217	24838	9282	18433	38948												3421	0.968909	0.98226	0.993381	0.973258	0.991027	0.991175	0.989597	1.00024	0.995971		3421	0.987313	0.0104563	0.00348545
3521	28284	21749	32055	26919	36249	24838	9282	18433	38915												3521	0.97114	0.985205	0.994373	0.976814	0.991903	0.991175	0.989597	1.00024	0.995127		3521	0.988398	0.00925289	0.0030843
3621	28317	21814	32023	26951	36249	24805	9311	18433	38980												3621	0.972273	0.988149	0.993381	0.977975	0.991903	0.989858	0.992689	1.00024	0.996789		3621	0.989251	0.00887773	0.00295924
3721	28414	21814	32023	27016	36314	24838	9321	18433	38948												3721	0.975604	0.988149	0.993381	0.980334	0.993682	0.991175	0.993755	1.00024	0.995971		3721	0.990255	0.00778261	0.0025942
3821	28414	21814	32088	26984	36314	24870	9292	18466	38980												3821	0.975604	0.988149	0.995397	0.979173	0.993682	0.992452	0.990664	1.00203	0.996789		3821	0.990438	0.00841283	0.00280428
3921	28512	21847	32088	27049	36314	24935	9311	18433	39045												3921	0.978969	0.989644	0.995397	0.981532	0.993682	0.995046	0.992689	1.00024	0.998451		3921	0.991739	0.00722861	0.00240954
4021	28544	21879	32120	27146	36379	24935	9272	18433	39045												4021	0.980068	0.991093	0.99639	0.985051	0.99546	0.995046	0.988531	1.00024	0.998451		4021	0.992259	0.00664265	0.00221422
4121	28544	21879	32153	27114	36379	24935	9341	18433	39013												4121	0.980068	0.991093	0.997413	0.98389	0.99546	0.995046	0.995888	1.00024	0.997633		4121	0.99297	0.00676242	0.00225414
4221	28609	21912	32120	27179	36379	24903	9351	18433	39045												4221	0.982299	0.992588	0.99639	0.986249	0.99546	0.993769	0.996954	1.00024	0.998451		4221	0.9936	0.00584112	0.00194704
4321	28642	21912	32185	27211	36444	24968	9331	18466	39013												4321	0.983432	0.992588	0.998406	0.98741	0.997239	0.996363	0.994822	1.00203	0.997633		4321	0.994436	0.00580172	0.00193391
4421	28674	21977	32185	27244	36412	24968	9341	18433	39078												4421	0.984531	0.995533	0.998406	0.988608	0.996363	0.996363	0.995888	1.00024	0.999295		4421	0.995025	0.00515726	0.00171909
4521	28707	21977	32185	27244	36444	24935	9351	18466	39045												4521	0.985664	0.995533	0.998406	0.988608	0.997239	0.995046	0.996954	1.00203	0.998451		4521	0.995326	0.00511326	0.00170442
4621	28772	21944	32153	27309	36444	24968	9331	18466	39045												4621	0.987896	0.994038	0.997413	0.990966	0.997239	0.996363	0.994822	1.00203	0.998451		4621	0.995469	0.00418019	0.0013934
4721	28772	21977	32185	27276	36477	25000	9381	18433	39078												4721	0.987896	0.995533	0.998406	0.989769	0.998142	0.99764	1.00015	1.00024	0.999295		4721	0.996342	0.00451162	0.00150387
4821	28804	22009	32185	27341	36477	25000	9341	18433	39078												4821	0.988995	0.996982	0.998406	0.992127	0.998142	0.99764	0.995888	1.00024	0.999295		4821	0.996413	0.00363039	0.00121013
4921	28804	22009	32185	27374	36509	25033	9391	18466	39078												4921	0.988995	0.996982	0.998406	0.993325	0.999018	0.998957	1.00122	1.00203	0.999295		4921	0.997581	0.00407475	0.00135825
5021	28902	22009	32218	27374	36542	25033	9371	18433	39110												5021	0.99236	0.996982	0.99943	0.993325	0.999921	0.998957	0.999086	1.00024	1.00011		5021	0.997824	0.00299484	0.000998279
5121	28869	22042	32218	27374	36542	25000	9351	18466	39078												5121	0.991227	0.998477	0.99943	0.993325	0.999921	0.99764	0.996954	1.00203	0.999295		5121	0.997589	0.00337913	0.00112638
5221	28902	22042	32185	27406	36509	25000	9361	18466	39110												5221	0.99236	0.998477	0.998406	0.994486	0.999018	0.99764	0.99802	1.00203	1.00011		5221	0.997839	0.00287713	0.000959044
5321	28902	22042	32218	27439	36509	25065	9381	18466	39078												5321	0.99236	0.998477	0.99943	0.995684	0.999018	1.00023	1.00015	1.00203	0.999295		5321	0.99852	0.00286401	0.000954671
5421	28934	22009	32250	27439	36509	25065	9391	18433	39110												5421	0.993458	0.996982	1.00042	0.995684	0.999018	1.00023	1.00122	1.00024	1.00011		5421	0.998597	0.00263557	0.000878524
5521	28999	22009	32250	27471	36509	25065	9391	18401	39078												5521	0.99569	0.996982	1.00042	0.996845	0.999018	1.00023	1.00122	0.998506	0.999295		5521	0.99869	0.0018576	0.0006192
5621	28967	22074	32218	27471	36542	25033	9371	18433	39110												5621	0.994591	0.999927	0.99943	0.996845	0.999921	0.998957	0.999086	1.00024	1.00011		5621	0.99879	0.00188313	0.000627709
5721	28999	22009	32218	27471	36542	25033	9371	18433	39143												5721	0.99569	0.996982	0.99943	0.996845	0.999921	0.998957	0.999086	1.00024	1.00096		5721	0.998679	0.00177344	0.000591145
5821	28999	22074	32250	27471	36574	25033	9371	18466	39110												5821	0.99569	0.999927	1.00042	0.996845	1.0008	0.998957	0.999086	1.00203	1.00011		5821	0.999319	0.00197627	0.000658756
5921	28967	22074	32185	27504	36542	25033	9401	18433	39110												5921	0.994591	0.999927	0.998406	0.998042	0.999921	0.998957	1.00228	1.00024	1.00011		5921	0.999165	0.0021137	0.000704567
6021	29064	22074	32250	27504	36509	25033	9361	18466	39110												6021	0.997922	0.999927	1.00042	0.998042	0.999018	0.998957	0.99802	1.00203	1.00011		6021	0.999384	0.00137115	0.000457051
6121	29064	22074	32218	27569	36509	25065	9361	18433	39143												6121	0.997922	0.999927	0.99943	1.0004	0.999018	1.00023	0.99802	1.00024	1.00096		6121	0.999572	0.00106528	0.000355093
6221	29064	22074	32218	27536	36542	25065	9371	18433	39045												6221	0.997922	0.999927	0.99943	0.999203	0.999921	1.00023	0.999086	1.00024	0.998451		6221	0.99938	0.000804162	0.000268054
6321	29129	22074	32250	27569	36542	25033	9401	18433	39143												6321	1.00015	0.999927	1.00042	1.0004	0.999921	0.998957	1.00228	1.00024	1.00096		6321	1.00036	0.000899475	0.000299825
6421	29129	22074	32283	27536	36574	25033	9391	18433	39143												6421	1.00015	0.999927	1.00145	0.999203	1.0008	0.998957	1.00122	1.00024	1.00096		6421	1.00032	0.000866139	0.000288713
6521	29162	22074	32250	27569	36574	25098	9371	18466	39143												6521	1.00129	0.999927	1.00042	1.0004	1.0008	1.00155	0.999086	1.00203	1.00096		6521	1.00072	0.000886555	0.000295518
6621	29129	22074	32250	27536	36542	25033	9371	18401	39078												6621	1.00015	0.999927	1.00042	0.999203	0.999921	0.998957	0.999086	0.998506	0.999295		6621	0.999497	0.000634485	0.000211495
6721	29194	22074	32218	27569	36542	25065	9401	18433	39110												6721	1.00239	0.999927	0.99943	1.0004	0.999921	1.00023	1.00228	1.00024	1.00011		6721	1.00055	0.00105029	0.000350095
6821	29162	22074	32218	27569	36574	25065	9401	18401	39045												6821	1.00129	0.999927	0.99943	1.0004	1.0008	1.00023	1.00228	0.998506	0.998451		6821	1.00015	0.00124961	0.000416537
6921	29194	22074	32218	27569	36574	25098	9381	18433	39110												6921	1.00239	0.999927	0.99943	1.0004	1.0008	1.00155	1.00015	1.00024	1.00011		6921	1.00056	0.000904118	0.000301373
7021	29194	22107	32218	27601	36542	25098	9371	18433	39110												7021	1.00239	1.00142	0.99943	1.00156	0.999921	1.00155	0.999086	1.00024	1.00011		7021	1.00063	0.00112741	0.000375805
7121	29162	22074	32283	27601	36542	25033	9361	18433	39110												7121	1.00129	0.999927	1.00145	1.00156	0.999921	0.998957	0.99802	1.00024	1.00011		7121	1.00016	0.00117461	0.000391537
7221	29194	22074	32250	27569	36542	25098	9421	18433	39078												7221	1.00239	0.999927	1.00042	1.0004	0.999921	1.00155	1.00442	1.00024	0.999295		7221	1.00095	0.00159557	0.000531857
7321	29194	22074	32283	27634	36509	25098	9391	18401	39078												7321	1.00239	0.999927	1.00145	1.00276	0.999018	1.00155	1.00122	0.998506	0.999295		7321	1.00068	0.00153469	0.000511563
7421	29227	22074	32218	27634	36542	25065	9371	18433	39110												7421	1.00352	0.999927	0.99943	1.00276	0.999921	1.00023	0.999086	1.00024	1.00011		7421	1.00058	0.00151051	0.000503504
7521	29194	22107	32250	27634	36542	25065	9361	18368	39078												7521	1.00239	1.00142	1.00042	1.00276	0.999921	1.00023	0.99802	0.996716	0.999295		7521	1.00013	0.00195629	0.000652095
7621	29227	22107	32218	27601	36542	25065	9371	18401	39110												7621	1.00352	1.00142	0.99943	1.00156	0.999921	1.00023	0.999086	0.998506	1.00011		7621	1.00042	0.00152921	0.000509738
7721	29227	22139	32250	27601	36542	25033	9391	18401	39078												7721	1.00352	1.00287	1.00042	1.00156	0.999921	0.998957	1.00122	0.998506	0.999295		7721	1.0007	0.0017385	0.0005795
7821	29194	22107	32218	27634	36542	25065	9381	18401	39078												7821	1.00239	1.00142	0.99943	1.00276	0.999921	1.00023	1.00015	0.998506	0.999295		7821	1.00046	0.00144013	0.000480042
7921	29194	22107	32218	27634	36542	25098	9401	18433	39110												7921	1.00239	1.00142	0.99943	1.00276	0.999921	1.00155	1.00228	1.00024	1.00011		7921	1.00112	0.00122477	0.000408257
8021	29194	22107	32185	27634	36542	25065	9411	18433	39078												8021	1.00239	1.00142	0.998406	1.00276	0.999921	1.00023	1.00335	1.00024	0.999295		8021	1.00089	0.00167976	0.000559919
8121	29227	22107	32250	27601	36542	25033	9401	18368	39078												8121	1.00352	1.00142	1.00042	1.00156	0.999921	0.998957	1.00228	0.996716	0.999295		8121	1.00046	0.00202336	0.000674452
8221	29259	22107	32250	27634	36509	25033	9381	18368	39045												8221	1.00462	1.00142	1.00042	1.00276	0.999018	0.998957	1.00015	0.996716	0.998451		8221	1.00028	0.00238991	0.000796638
8321	29227	22074	32250	27601	36509	25000	9391	18401	39078												8321	1.00352	0.999927	1.00042	1.00156	0.999018	0.99764	1.00122	0.998506	0.999295		8321	1.00012	0.00178941	0.00059647
8421	29227	22107	32218	27634	36542	25033	9381	18368	39078												8421	1.00352	1.00142	0.99943	1.00276	0.999921	0.998957	1.00015	0.996716	0.999295		8421	1.00024	0.00206819	0.000689398
8521	29259	22042	32218	27634	36574	25033	9371	18368	39078												8521	1.00462	0.998477	0.99943	1.00276	1.0008	0.998957	0.999086	0.996716	0.999295		8521	1.00001	0.00238269	0.000794228
8621	29227	22107	32185	27634	36477	25065	9391	18401	39110												8621	1.00352	1.00142	0.998406	1.00276	0.998142	1.00023	1.00122	0.998506	1.00011		8621	1.00048	0.00192739	0.000642464
8721	29227	22107	32185	27634	36542	25033	9381	18401	39045												8721	1.00352	1.00142	0.998406	1.00276	0.999921	0.998957	1.00015	0.998506	0.998451		8721	1.00023	0.00193059	0.000643531
8821	29227	22042	32218	27634	36509	25065	9401	18368	39078												8821	1.00352	0.998477	0.99943	1.00276	0.999018	1.00023	1.00228	0.996716	0.999295		8821	1.00019	0.00223129	0.000743763
8921	29259	22139	32218	27666	36509	25065	9401	18368	39078												8921	1.00462	1.00287	0.99943	1.00392	0.999018	1.00023	1.00228	0.996716	0.999295		8921	1.00093	0.0026213	0.000873765
9021	29227	22107	32218	27601	36509	25033	9371	18401	39013												9021	1.00352	1.00142	0.99943	1.00156	0.999018	0.998957	0.999086	0.998506	0.997633		9021	0.999904	0.00186432	0.00062144
9121	29259	22074	32218	27666	36542	25065	9381	18368	39013												9121	1.00462	0.999927	0.99943	1.00392	0.999921	1.00023	1.00015	0.996716	0.997633		9121	1.00028	0.00256841	0.000856137
9221	29292	22074	32218	27634	36509	25033	9401	18368	39078												9221	1.00575	0.999927	0.99943	1.00276	0.999018	0.998957	1.00228	0.996716	0.999295		9221	1.00046	0.00268486	0.000894954
9321	29259	22139	32153	27666	36509	25065	9401	18368	39045												9321	1.00462	1.00287	0.997413	1.00392	0.999018	1.00023	1.00228	0.996716	0.998451		9321	1.00061	0.00290813	0.000969375
9421	29292	22074	32218	27634	36509	25065	9391	18336	39078												9421	1.00575	0.999927	0.99943	1.00276	0.999018	1.00023	1.00122	0.994979	0.999295		9421	1.00029	0.00292541	0.000975135
9521	29259	22107	32185	27666	36509	25033	9381	18401	39013												9521	1.00462	1.00142	0.998406	1.00392	0.999018	0.998957	1.00015	0.998506	0.997633		9521	1.00029	0.00250984	0.000836615
9621	29292	22139	32185	27634	36477	25033	9391	18336	39045												9621	1.00575	1.00287	0.998406	1.00276	0.998142	0.998957	1.00122	0.994979	0.998451		9621	1.00017	0.00325645	0.00108548
9721	29292	22074	32185	27634	36444	25033	9341	18336	39013												9721	1.00575	0.999927	0.998406	1.00276	0.997239	0.998957	0.995888	0.994979	0.997633		9721	0.99906	0.00338573	0.00112858
9821	29292	22074	32218	27666	36477	25065	9361	18336	39078												9821	1.00575	0.999927	0.99943	1.00392	0.998142	1.00023	0.99802	0.994979	0.999295		9821	0.999966	0.00319943	0.00106648
9921	29259	22107	32153	27634	36477	25000	9401	18368	38980												9921	1.00462	1.00142	0.997413	1.00276	0.998142	0.99764	1.00228	0.996716	0.996789		9921	0.999754	0.00300913	0.00100304
10021	29292	22074	32218	27666	36444	25033	9361	18336	39013												10021	1.00575	0.999927	0.99943	1.00392	0.997239	0.998957	0.99802	0.994979	0.997633		10021	0.999539	0.00335976	0.00111992
10121	29292	22074	32185	27634	36477	25033	9441	18368	39013												10121	1.00575	0.999927	0.998406	1.00276	0.998142	0.998957	1.00655	0.996716	0.997633		10121	1.00054	0.00361332	0.00120444
10221	29259	22074	32185	27601	36509	25000	9371	18368	39013												10221	1.00462	0.999927	0.998406	1.00156	0.999018	0.99764	0.999086	0.996716	0.997633		10221	0.9994	0.00241948	0.000806492
10321	29292	22107	32153	27666	36477	25033	9391	18368	39045												10321	1.00575	1.00142	0.997413	1.00392	0.998142	0.998957	1.00122	0.996716	0.998451		10321	1.00022	0.0030806	0.00102687
10421	29292	22074	32185	27634	36477	25033	9411	18271	39045												10421	1.00575	0.999927	0.998406	1.00276	0.998142	0.998957	1.00335	0.991452	0.998451		10421	0.999688	0.00408636	0.00136212
10521	29292	22074	32185	27666	36477	25033	9411	18303	39013												10521	1.00575	0.999927	0.998406	1.00392	0.998142	0.998957	1.00335	0.993189	0.997633		10521	0.999919	0.00385184	0.00128395
10621	29292	22107	32185	27634	36477	25000	9371	18336	39013												10621	1.00575	1.00142	0.998406	1.00276	0.998142	0.99764	0.999086	0.994979	0.997633		10621	0.999535	0.00323975	0.00107992
10721	29292	22042	32185	27634	36444	25033	9391	18336	39045												10721	1.00575	0.998477	0.998406	1.00276	0.997239	0.998957	1.00122	0.994979	0.998451		10721	0.999582	0.0031971	0.0010657
10821	29259	22074	32153	27601	36477	25000	9361	18303	38980												10821	1.00462	0.999927	0.997413	1.00156	0.998142	0.99764	0.99802	0.993189	0.996789		10821	0.998589	0.00320507	0.00106836
10921	29259	22074	32153	27666	36509	25033	9391	18336	39013												10921	1.00462	0.999927	0.997413	1.00392	0.999018	0.998957	1.00122	0.994979	0.997633		10921	0.999743	0.00310524	0.00103508
11021	29259	22042	32153	27666	36477	25065	9381	18303	38980												11021	1.00462	0.998477	0.997413	1.00392	0.998142	1.00023	1.00015	0.993189	0.996789		11021	0.999215	0.00354242	0.00118081
11121	29259	22107	32185	27634	36444	25000	9401	18303	39013												11121	1.00462	1.00142	0.998406	1.00276	0.997239	0.99764	1.00228	0.993189	0.997633		11121	0.999465	0.00355908	0.00118636
11221	29292	22074	32153	27666	36444	24968	9401	18336	38980												11221	1.00575	0.999927	0.997413	1.00392	0.997239	0.996363	1.00228	0.994979	0.996789		11221	0.999407	0.00376767	0.00125589
11321	29292	22042	32120	27666	36444	24968	9391	18336	39013												11321	1.00575	0.998477	0.99639	1.00392	0.997239	0.996363	1.00122	0.994979	0.997633		11321	0.999108	0.00370432	0.00123477
11421	29292	22042	32088	27601	36477	25000	9371	18336	38980												11421	1.00575	0.998477	0.995397	1.00156	0.998142	0.99764	0.999086	0.994979	0.996789		11421	0.998647	0.00331498	0.00110499
11521	29259	22042	32185	27601	36412	24968	9361	18303	38948												11521	1.00462	0.998477	0.998406	1.00156	0.996363	0.996363	0.99802	0.993189	0.995971		11521	0.998108	0.00334276	0.00111425
11621	29292	22074	32153	27634	36444	25000	9351	18271	38948												11621	1.00575	0.999927	0.997413	1.00276	0.997239	0.99764	0.996954	0.991452	0.995971		11621	0.998345	0.00410033	0.00136678
11721	29259	22074	32153	27601	36444	25000	9371	18303	38948												11721	1.00462	0.999927	0.997413	1.00156	0.997239	0.99764	0.999086	0.993189	0.995971		11721	0.998516	0.00330329	0.0011011
11821	29259	22074	32120	27634	36412	25033	9361	18336	38980												11821	1.00462	0.999927	0.99639	1.00276	0.996363	0.998957	0.99802	0.994979	0.996789		11821	0.998756	0.00319751	0.00106584
11921	29259	22042	32153	27601	36444	25000	9401	18303	38980												11921	1.00462	0.998477	0.997413	1.00156	0.997239	0.99764	1.00228	0.993189	0.996789		11921	0.998801	0.00344518	0.00114839
12021	29292	22074	32120	27634	36444	25000	9371	18271	38948												12021	1.00575	0.999927	0.99639	1.00276	0.997239	0.99764	0.999086	0.991452	0.995971		12021	0.998468	0.00412211	0.00137404
12121	29292	22009	32153	27634	36412	25033	9341	18271	39013												12121	1.00575	0.996982	0.997413	1.00276	0.996363	0.998957	0.995888	0.991452	0.997633		12121	0.998133	0.00410802	0.00136934
12221	29227	22074	32120	27634	36379	25000	9391	18303	38980												12221	1.00352	0.999927	0.99639	1.00276	0.99546	0.99764	1.00122	0.993189	0.996789		12221	0.998543	0.00350553	0.00116851
12321	29292	22042	32153	27634	36412	25000	9381	18303	38948												12321	1.00575	0.998477	0.997413	1.00276	0.996363	0.99764	1.00015	0.993189	0.995971		12321	0.998635	0.00378108	0.00126036
12421	29259	22042	32120	27634	36477	25000	9391	18303	38948												12421	1.00462	0.998477	0.99639	1.00276	0.998142	0.99764	1.00122	0.993189	0.995971		12421	0.998711	0.00357916	0.00119305
12521	29259	22074	32088	27634	36379	24968	9401	18303	38915												12521	1.00462	0.999927	0.995397	1.00276	0.99546	0.996363	1.00228	0.993189	0.995127		12521	0.998347	0.00410393	0.00136798
12621	29259	22074	32153	27634	36379	24968	9351	18271	38948												12621	1.00462	0.999927	0.997413	1.00276	0.99546	0.996363	0.996954	0.991452	0.995971		12621	0.99788	0.00399351	0.00133117
12721	29292	22042	32120	27634	36379	25000	9361	18303	38980												12721	1.00575	0.998477	0.99639	1.00276	0.99546	0.99764	0.99802	0.993189	0.996789		12721	0.998275	0.00380884	0.00126961
12821	29324	22042	32120	27634	36379	25000	9361	18271	38948												12821	1.00685	0.998477	0.99639	1.00276	0.99546	0.99764	0.99802	0.991452	0.995971		12821	0.998113	0.00443336	0.00147779
12921	29324	22074	32120	27601	36412	25000	9351	18303	38948												12921	1.00685	0.999927	0.99639	1.00156	0.996363	0.99764	0.996954	0.993189	0.995971		12921	0.998316	0.0039933	0.0013311
13021	29259	22042	32055	27666	36379	25000	9361	18271	38915												13021	1.00462	0.998477	0.994373	1.00392	0.99546	0.99764	0.99802	0.991452	0.995127		13021	0.997676	0.00431554	0.00143851
13121	29259	22042	32088	27634	36412	24968	9361	18303	38915												13121	1.00462	0.998477	0.995397	1.00276	0.996363	0.996363	0.99802	0.993189	0.995127		13121	0.997813	0.00370629	0.00123543
13221	29292	22042	32120	27601	36412	24968	9391	18303	38915												13221	1.00575	0.998477	0.99639	1.00156	0.996363	0.996363	1.00122	0.993189	0.995127		13221	0.998271	0.00390574	0.00130191
13321	29259	22009	32120	27634	36347	24968	9381	18271	38948												13321	1.00462	0.996982	0.99639	1.00276	0.994585	0.996363	1.00015	0.991452	0.995971		13321	0.997697	0.00411116	0.00137039
13421	29324	22009	32088	27666	36347	24935	9341	18238	38915												13421	1.00685	0.996982	0.995397	1.00392	0.994585	0.995046	0.995888	0.989661	0.995127		13421	0.997051	0.00519254	0.00173085
13521	29292	22009	32088	27601	36379	24968	9371	18238	38948												13521	1.00575	0.996982	0.995397	1.00156	0.99546	0.996363	0.999086	0.989661	0.995971		13521	0.997359	0.00448374	0.00149458
13621	29292	22042	32120	27634	36314	24968	9371	18271	38948												13621	1.00575	0.998477	0.99639	1.00276	0.993682	0.996363	0.999086	0.991452	0.995971		13621	0.99777	0.00439554	0.00146518
13721	29227	22042	32120	27634	36347	24935	9361	18238	38948												13721	1.00352	0.998477	0.99639	1.00276	0.994585	0.995046	0.99802	0.989661	0.995971		13721	0.997159	0.00423671	0.00141224
13821	29259	22009	32088	27634	36379	24903	9361	18238	38948												13821	1.00462	0.996982	0.995397	1.00276	0.99546	0.993769	0.99802	0.989661	0.995971		13821	0.99696	0.00450714	0.00150238
13921	29227	22042	32120	27601	36379	24968	9351	18238	38915												13921	1.00352	0.998477	0.99639	1.00156	0.99546	0.996363	0.996954	0.989661	0.995127		13921	0.997057	0.00396817	0.00132272
15321	29259	22009	32055	27536	36314	24903	9341	18238	38818												15321	1.00462	0.996982	0.994373	0.999203	0.993682	0.993769	0.995888	0.989661	0.992646		15321	0.995647	0.00431273	0.00143758
16321	29227	21977	32023	27569	36282	24870	9361	18206	38818												16321	1.00352	0.995533	0.993381	1.0004	0.992806	0.992452	0.99802	0.987925	0.992646		16321	0.995187	0.00474799	0.00158266
17321	29227	21977	32023	27536	36217	24903	9311	18206	38785												17321	1.00352	0.995533	0.993381	0.999203	0.991027	0.993769	0.992689	0.987925	0.991802		17321	0.994316	0.00463481	0.00154494
18321	29227	21944	31990	27536	36184	24870	9292	18173	38785												18321	1.00352	0.994038	0.992357	0.999203	0.990124	0.992452	0.990664	0.986134	0.991802		18321	0.993366	0.0051479	0.00171597
19321	29194	21944	31958	27504	36184	24903	9331	18173	38785												19321	1.00239	0.994038	0.991364	0.998042	0.990124	0.993769	0.994822	0.986134	0.991802		19321	0.993609	0.00467273	0.00155758
20321	29194	21912	31958	27504	36184	24870	9331	18141	38753												20321	1.00239	0.992588	0.991364	0.998042	0.990124	0.992452	0.994822	0.984398	0.990984		20321	0.993018	0.00507815	0.00169272
21321	29194	21912	31893	27471	36119	24838	9351	18141	38720												21321	1.00239	0.992588	0.989348	0.996845	0.988346	0.991175	0.996954	0.984398	0.99014		21321	0.992464	0.00543822	0.00181274
22321	29129	21912	31860	27439	36119	24838	9311	18108	38688												22321	1.00015	0.992588	0.988324	0.995684	0.988346	0.991175	0.992689	0.982607	0.989322		22321	0.99121	0.00497739	0.00165913
23321	29129	21847	31893	27471	36087	24805	9302	18141	38655												23321	1.00015	0.989644	0.989348	0.996845	0.98747	0.989858	0.99173	0.984398	0.988478		23321	0.99088	0.00483005	0.00161002
24321	29129	21879	31860	27439	36054	24805	9262	18108	38655												24321	1.00015	0.991093	0.988324	0.995684	0.986567	0.989858	0.987465	0.982607	0.988478		24321	0.990026	0.00517926	0.00172642
25321	29129	21912	31860	27406	36087	24773	9262	18108	38655												25321	1.00015	0.992588	0.988324	0.994486	0.98747	0.988581	0.987465	0.982607	0.988478		25321	0.990017	0.00505637	0.00168546
26321	29097	21847	31860	27406	36087	24773	9292	18076	38590												26321	0.999055	0.989644	0.988324	0.994486	0.98747	0.988581	0.990664	0.980871	0.986816		26321	0.989546	0.00506864	0.00168955
27321	29097	21814	31828	27406	35989	24740	9272	18076	38590												27321	0.999055	0.988149	0.987332	0.994486	0.984788	0.987264	0.988531	0.980871	0.986816		27321	0.988588	0.00530334	0.00176778
28321	29064	21814	31828	27406	35957	24740	9272	18076	38623												28321	0.997922	0.988149	0.987332	0.994486	0.983913	0.987264	0.988531	0.980871	0.98766		28321	0.988459	0.00509362	0.00169787
29321	29032	21782	31795	27374	35957	24740	9262	18043	38623												29321	0.996823	0.986699	0.986308	0.993325	0.983913	0.987264	0.987465	0.97908	0.98766		29321	0.987615	0.00508231	0.0016941
30321	29064	21782	31828	27341	35957	24773	9292	18043	38558												30321	0.997922	0.986699	0.987332	0.992127	0.983913	0.988581	0.990664	0.97908	0.985998		30321	0.988035	0.00530707	0.00176902
31321	28999	21782	31763	27341	35957	24708	9272	18043	38525												31321	0.99569	0.986699	0.985315	0.992127	0.983913	0.985987	0.988531	0.97908	0.985154		31321	0.986944	0.00479249	0.0015975
32321	28999	21749	31828	27341	35892	24708	9262	18011	38525												32321	0.99569	0.985205	0.987332	0.992127	0.982134	0.985987	0.987465	0.977344	0.985154		32321	0.986493	0.00529625	0.00176542
33321	29032	21749	31763	27341	35924	24675	9282	18043	38525												33321	0.996823	0.985205	0.985315	0.992127	0.98301	0.984671	0.989597	0.97908	0.985154		33321	0.986776	0.00527522	0.00175841
34321	28999	21749	31730	27309	35892	24708	9232	18011	38460												34321	0.99569	0.985205	0.984292	0.990966	0.982134	0.985987	0.984267	0.977344	0.983492		34321	0.985486	0.00523105	0.00174368
35321	28967	21782	31730	27244	35859	24708	9252	18043	38460												35321	0.994591	0.986699	0.984292	0.988608	0.981231	0.985987	0.986399	0.97908	0.983492		35321	0.985598	0.00446711	0.00148904
36321	28967	21749	31730	27276	35827	24675	9212	17978	38428												36321	0.994591	0.985205	0.984292	0.989769	0.980356	0.984671	0.982134	0.975553	0.982673		36321	0.98436	0.0054331	0.00181103
37321	28967	21717	31698	27276	35859	24708	9252	17978	38460												37321	0.994591	0.983755	0.983299	0.989769	0.981231	0.985987	0.986399	0.975553	0.983492		37321	0.984897	0.00533553	0.00177851
38321	28999	21717	31698	27276	35827	24643	9272	18011	38428												38321	0.99569	0.983755	0.983299	0.989769	0.980356	0.983394	0.988531	0.977344	0.982673		38321	0.984979	0.0055013	0.00183377
39321	28967	21749	31698	27276	35859	24675	9232	17946	38395												39321	0.994591	0.985205	0.983299	0.989769	0.981231	0.984671	0.984267	0.973816	0.981829		39321	0.984298	0.0057359	0.00191197
40321	28934	21717	31698	27244	35794	24643	9272	17946	38428												40321	0.993458	0.983755	0.983299	0.988608	0.979453	0.983394	0.988531	0.973816	0.982673		40321	0.98411	0.00568085	0.00189362
41321	28934	21749	31665	27211	35794	24610	9272	17978	38395												41321	0.993458	0.985205	0.982275	0.98741	0.979453	0.982077	0.988531	0.975553	0.981829		41321	0.983977	0.00532077	0.00177359
42321	28934	21684	31665	27211	35762	24610	9262	17946	38362												42321	0.993458	0.98226	0.982275	0.98741	0.978577	0.982077	0.987465	0.973816	0.980986		42321	0.983147	0.00568388	0.00189463
43321	28902	21717	31665	27244	35729	24610	9242	17946	38395												43321	0.99236	0.983755	0.982275	0.988608	0.977674	0.982077	0.985333	0.973816	0.981829		43321	0.983081	0.00548238	0.00182746
44321	28934	21684	31665	27211	35729	24675	9242	17946	38395												44321	0.993458	0.98226	0.982275	0.98741	0.977674	0.984671	0.985333	0.973816	0.981829		44321	0.983192	0.00561108	0.00187036
45321	28902	21684	31665	27244	35762	24610	9232	17913	38362												45321	0.99236	0.98226	0.982275	0.988608	0.978577	0.982077	0.984267	0.972026	0.980986		45321	0.982604	0.00575781	0.00191927
46321	28902	21619	31633	27211	35697	24643	9242	17913	38330												46321	0.99236	0.979316	0.981283	0.98741	0.976798	0.983394	0.985333	0.972026	0.980167		46321	0.98201	0.0059923	0.00199743
47321	28902	21652	31600	27244	35697	24610	9202	17946	38330												47321	0.99236	0.980811	0.980259	0.988608	0.976798	0.982077	0.981068	0.973816	0.980167		47321	0.981774	0.00562613	0.00187538
48321	28902	21619	31633	27244	35729	24610	9252	17913	38330												48321	0.99236	0.979316	0.981283	0.988608	0.977674	0.982077	0.986399	0.972026	0.980167		48321	0.982212	0.00611568	0.00203856
49321	28902	21684	31633	27179	35697	24578	9222	17913	38297												49321	0.99236	0.98226	0.981283	0.986249	0.976798	0.9808	0.983201	0.972026	0.979323		49321	0.981589	0.00571209	0.00190403
50321	28869	21652	31600	27179	35664	24610	9202	17881	38297												50321	0.991227	0.980811	0.980259	0.986249	0.975895	0.982077	0.981068	0.970289	0.979323		50321	0.9808	0.00588545	0.00196182
51321	28869	21652	31600	27179	35697	24578	9202	17881	38297												51321	0.991227	0.980811	0.980259	0.986249	0.976798	0.9808	0.981068	0.970289	0.979323		51321	0.980758	0.00578165	0.00192722
52321	28869	21619	31600	27146	35664	24610	9212	17913	38265												52321	0.991227	0.979316	0.980259	0.985051	0.975895	0.982077	0.982134	0.972026	0.978505		52321	0.980721	0.0054652	0.00182173
53321	28869	21652	31600	27146	35697	24610	9232	17913	38265												53321	0.991227	0.980811	0.980259	0.985051	0.976798	0.982077	0.984267	0.972026	0.978505		53321	0.981224	0.00544718	0.00181573
54321	28869	21554	31568	27179	35632	24578	9232	17848	38232												54321	0.991227	0.976371	0.979266	0.986249	0.97502	0.9808	0.984267	0.968499	0.977661		54321	0.979929	0.00670954	0.00223651
55321	28804	21587	31568	27146	35664	24578	9212	17881	38265												55321	0.988995	0.977866	0.979266	0.985051	0.975895	0.9808	0.982134	0.970289	0.978505		55321	0.979867	0.00536109	0.00178703
56321	28837	21619	31568	27114	35664	24545	9192	17913	38265												56321	0.990128	0.979316	0.979266	0.98389	0.975895	0.979483	0.980002	0.972026	0.978505		56321	0.979835	0.00501754	0.00167251
57321	28869	21587	31568	27146	35632	24545	9222	17913	38232												57321	0.991227	0.977866	0.979266	0.985051	0.97502	0.979483	0.983201	0.972026	0.977661		57321	0.980089	0.00571123	0.00190374
58321	28804	21587	31535	27146	35567	24545	9212	17848	38200												58321	0.988995	0.977866	0.978243	0.985051	0.973241	0.979483	0.982134	0.968499	0.976843		58321	0.978928	0.00608772	0.00202924
59321	28804	21619	31568	27146	35599	24545	9202	17881	38265												59321	0.988995	0.979316	0.979266	0.985051	0.974117	0.979483	0.981068	0.970289	0.978505		59321	0.979566	0.00545761	0.0018192
60321	28837	21554	31535	27081	35632	24578	9232	17848	38232												60321	0.990128	0.976371	0.978243	0.982693	0.97502	0.9808	0.984267	0.968499	0.977661		60321	0.979298	0.00615469	0.00205156
61321	28804	21554	31568	27114	35632	24545	9172	17881	38232												61321	0.988995	0.976371	0.979266	0.98389	0.97502	0.979483	0.97787	0.970289	0.977661		61321	0.978761	0.00530678	0.00176893
62321	28804	21587	31535	27146	35567	24513	9202	17881	38232												62321	0.988995	0.977866	0.978243	0.985051	0.973241	0.978206	0.981068	0.970289	0.977661		62321	0.978958	0.00563582	0.00187861
63321	28804	21587	31503	27114	35599	24513	9202	17881	38232												63321	0.988995	0.977866	0.97725	0.98389	0.974117	0.978206	0.981068	0.970289	0.977661		63321	0.978816	0.00541151	0.00180384
64321	28837	21554	31503	27114	35632	24513	9182	17913	38200												64321	0.990128	0.976371	0.97725	0.98389	0.97502	0.978206	0.978936	0.972026	0.976843		64321	0.978741	0.00532544	0.00177515
65321	28837	21587	31503	27114	35567	24545	9172	17848	38167												65321	0.990128	0.977866	0.97725	0.98389	0.973241	0.979483	0.97787	0.968499	0.975999		65321	0.978247	0.00613343	0.00204448
66321	28804	21554	31535	27081	35567	24513	9202	17848	38200												66321	0.988995	0.976371	0.978243	0.982693	0.973241	0.978206	0.981068	0.968499	0.976843		66321	0.97824	0.00579676	0.00193225
67321	28804	21554	31503	27114	35567	24513	9182	17881	38200												67321	0.988995	0.976371	0.97725	0.98389	0.973241	0.978206	0.978936	0.970289	0.976843		67321	0.978225	0.00550795	0.00183598
68321	28772	21587	31503	27081	35599	24545	9232	17816	38167												68321	0.987896	0.977866	0.97725	0.982693	0.974117	0.979483	0.984267	0.966762	0.975999		68321	0.978481	0.00617749	0.00205916
69321	28772	21587	31535	27049	35534	24480	9182	17881	38167												69321	0.987896	0.977866	0.978243	0.981532	0.972338	0.976889	0.978936	0.970289	0.975999		69321	0.977776	0.0050948	0.00169827
70321	28804	21554	31470	27114	35534	24545	9162	17816	38135												70321	0.988995	0.976371	0.976226	0.98389	0.972338	0.979483	0.976804	0.966762	0.975181		70321	0.977339	0.00639696	0.00213232
71321	28772	21587	31503	27081	35502	24513	9192	17848	38167												71321	0.987896	0.977866	0.97725	0.982693	0.971462	0.978206	0.980002	0.968499	0.975999		71321	0.977764	0.00571294	0.00190431
72321	28739	21587	31503	27081	35534	24513	9192	17881	38135												72321	0.986763	0.977866	0.97725	0.982693	0.972338	0.978206	0.980002	0.970289	0.975181		72321	0.977843	0.0050334	0.0016778
73321	28772	21587	31470	27081	35534	24545	9192	17848	38135												73321	0.987896	0.977866	0.976226	0.982693	0.972338	0.979483	0.980002	0.968499	0.975181		73321	0.977798	0.00569254	0.00189751
74321	28772	21522	31503	27049	35534	24513	9182	17848	38135												74321	0.987896	0.974922	0.97725	0.981532	0.972338	0.978206	0.978936	0.968499	0.975181		74321	0.977195	0.00554318	0.00184773
75321	28772	21554	31438	27081	35469	24480	9172	17848	38167												75321	0.987896	0.976371	0.975234	0.982693	0.970559	0.976889	0.97787	0.968499	0.975999		75321	0.97689	0.00581015	0.00193672
76321	28739	21522	31470	27049	35534	24513	9202	17816	38102												76321	0.986763	0.974922	0.976226	0.981532	0.972338	0.978206	0.981068	0.966762	0.974337		76321	0.976906	0.00583451	0.00194484
77321	28804	21489	31503	27049	35534	24513	9202	17816	38102												77321	0.988995	0.973427	0.97725	0.981532	0.972338	0.978206	0.981068	0.966762	0.974337		77321	0.977102	0.00641082	0.00213694
78321	28772	21554	31503	27049	35469	24480	9182	17848	38102												78321	0.987896	0.976371	0.97725	0.981532	0.970559	0.976889	0.978936	0.968499	0.974337		78321	0.976919	0.00574743	0.00191581
79321	28772	21522	31438	27016	35502	24480	9202	17848	38102												79321	0.987896	0.974922	0.975234	0.980334	0.971462	0.976889	0.981068	0.968499	0.974337		79321	0.976738	0.00573644	0.00191215
80321	28739	21522	31470	26984	35502	24448	9182	17816	38102												80321	0.986763	0.974922	0.976226	0.979173	0.971462	0.975612	0.978936	0.966762	0.974337		80321	0.976021	0.00552925	0.00184308
81321	28739	21554	31438	27016	35436	24480	9172	17816	38102												81321	0.986763	0.976371	0.975234	0.980334	0.969656	0.976889	0.97787	0.966762	0.974337		81321	0.976024	0.00578766	0.00192922
82321	28772	21489	31470	27016	35469	24513	9172	17816	38167												82321	0.987896	0.973427	0.976226	0.980334	0.970559	0.978206	0.97787	0.966762	0.975999		82321	0.976364	0.00601119	0.00200373
83321	28772	21522	31438	27049	35469	24480	9182	17816	38102												83321	0.987896	0.974922	0.975234	0.981532	0.970559	0.976889	0.978936	0.966762	0.974337		83321	0.976341	0.00612303	0.00204101
84321	28772	21489	31470	27016	35469	24448	9162	17783	38102												84321	0.987896	0.973427	0.976226	0.980334	0.970559	0.975612	0.976804	0.964971	0.974337		84321	0.975574	0.00632583	0.00210861
85321	28739	21522	31470	26984	35469	24480	9172	17783	38102												85321	0.986763	0.974922	0.976226	0.979173	0.970559	0.976889	0.97787	0.964971	0.974337		85321	0.975746	0.00596678	0.00198893
86321	28707	21522	31438	27016	35469	24513	9182	17816	38102												86321	0.985664	0.974922	0.975234	0.980334	0.970559	0.978206	0.978936	0.966762	0.974337		86321	0.976106	0.0055342	0.00184473
87321	28739	21489	31470	27016	35436	24513	9192	17816	38102												87321	0.986763	0.973427	0.976226	0.980334	0.969656	0.978206	0.980002	0.966762	0.974337		87321	0.97619	0.00602286	0.00200762
88321	28772	21489	31405	27049	35436	24513	9162	17848	38070												88321	0.987896	0.973427	0.97421	0.981532	0.969656	0.978206	0.976804	0.968499	0.973519		88321	0.975972	0.00602197	0.00200732
89321	28739	21489	31438	27049	35404	24448	9142	17848	38070												89321	0.986763	0.973427	0.975234	0.981532	0.968781	0.975612	0.974671	0.968499	0.973519		89321	0.975337	0.00576798	0.00192266
90321	28739	21522	31438	27016	35404	24480	9192	17816	38070												90321	0.986763	0.974922	0.975234	0.980334	0.968781	0.976889	0.980002	0.966762	0.973519		90321	0.975912	0.0060902	0.00203007
101621	28674	21424	31405	26984	35371	24448	9162	17816	38037												101621	0.984531	0.970482	0.97421	0.979173	0.967878	0.975612	0.976804	0.966762	0.972675		101621	0.974236	0.00560872	0.00186957
111621	28707	21457	31373	26951	35306	24448	9162	17816	37972												111621	0.985664	0.971977	0.973217	0.977975	0.966099	0.975612	0.976804	0.966762	0.971013		111621	0.973903	0.00602775	0.00200925
121621	28642	21424	31373	26919	35339	24415	9152	17816	37972												121621	0.983432	0.970482	0.973217	0.976814	0.967002	0.974295	0.975738	0.966762	0.971013		121621	0.973195	0.00521335	0.00173778
131621	28642	21424	31308	26919	35306	24448	9142	17816	37972												131621	0.983432	0.970482	0.971201	0.976814	0.966099	0.975612	0.974671	0.966762	0.971013		131621	0.972899	0.00539635	0.00179878
141621	28642	21359	31308	26886	35274	24415	9162	17816	37940												141621	0.983432	0.967538	0.971201	0.975617	0.965223	0.974295	0.976804	0.966762	0.970194		141621	0.972341	0.00579055	0.00193018
151621	28642	21327	31308	26821	35241	24350	9172	17816	37907												151621	0.983432	0.966088	0.971201	0.973258	0.96432	0.971701	0.97787	0.966762	0.96935		151621	0.971554	0.00606269	0.0020209
161621	28609	21327	31308	26821	35209	24350	9122	17816	37875												161621	0.982299	0.966088	0.971201	0.973258	0.963445	0.971701	0.972539	0.966762	0.968532		161621	0.970647	0.00547505	0.00182502
171621	28609	21294	31243	26821	35209	24383	9132	17751	37875												171621	0.982299	0.964594	0.969184	0.973258	0.963445	0.973018	0.973605	0.963235	0.968532		171621	0.97013	0.00617077	0.00205692
181621	28609	21294	31243	26821	35144	24415	9152	17783	37907												181621	0.982299	0.964594	0.969184	0.973258	0.961666	0.974295	0.975738	0.964971	0.96935		181621	0.970595	0.00647228	0.00215743
191621	28609	21294	31210	26789	35176	24318	9132	17783	37875												191621	0.982299	0.964594	0.968161	0.972097	0.962542	0.970424	0.973605	0.964971	0.968532		191621	0.969692	0.00595472	0.00198491
201621	28577	21262	31243	26789	35111	24318	9112	17783	37842												201621	0.981201	0.963144	0.969184	0.972097	0.960763	0.970424	0.971473	0.964971	0.967688		201621	0.968994	0.00598655	0.00199552
211621	28577	21262	31210	26756	35079	24350	9102	17783	37842												211621	0.981201	0.963144	0.968161	0.970899	0.959888	0.971701	0.970407	0.964971	0.967688		211621	0.968673	0.00609057	0.00203019
221621	28577	21262	31210	26724	35079	24350	9102	17783	37842												221621	0.981201	0.963144	0.968161	0.969738	0.959888	0.971701	0.970407	0.964971	0.967688		221621	0.968544	0.00604968	0.00201656
231621	28577	21229	31178	26724	35046	24285	9122	17751	37842												231621	0.981201	0.961649	0.967168	0.969738	0.958985	0.969107	0.972539	0.963235	0.967688		231621	0.967923	0.00655896	0.00218632
241621	28544	21229	31178	26724	35046	24285	9122	17783	37842												241621	0.980068	0.961649	0.967168	0.969738	0.958985	0.969107	0.972539	0.964971	0.967688		241621	0.96799	0.00614459	0.0020482
251621	28577	21197	31178	26756	35046	24318	9112	17816	37810												251621	0.981201	0.9602	0.967168	0.970899	0.958985	0.970424	0.971473	0.966762	0.96687		251621	0.96822	0.00657448	0.00219149
261621	28544	21164	31178	26724	35079	24253	9122	17783	37810												261621	0.980068	0.958705	0.967168	0.969738	0.959888	0.96783	0.972539	0.964971	0.96687		261621	0.967531	0.00642896	0.00214299
271621	28544	21229	31113	26756	35046	24318	9112	17816	37810												271621	0.980068	0.961649	0.965152	0.970899	0.958985	0.970424	0.971473	0.966762	0.96687		271621	0.968031	0.00616943	0.00205648
281621	28544	21164	31145	26756	35014	24285	9092	17751	37842												281621	0.980068	0.958705	0.966144	0.970899	0.958109	0.969107	0.969341	0.963235	0.967688		281621	0.967033	0.00669999	0.00223333
291621	28544	21197	31113	26724	35046	24285	9102	17751	37810												291621	0.980068	0.9602	0.965152	0.969738	0.958985	0.969107	0.970407	0.963235	0.96687		291621	0.967085	0.00634765	0.00211588
301621	28544	21197	31113	26691	35014	24318	9142	17751	37842												301621	0.980068	0.9602	0.965152	0.968541	0.958109	0.970424	0.974671	0.963235	0.967688		301621	0.967565	0.00692997	0.00230999
311621	28512	21164	31113	26724	35014	24285	9082	17783	37810												311621	0.978969	0.958705	0.965152	0.969738	0.958109	0.969107	0.968275	0.964971	0.96687		311621	0.966655	0.00623654	0.00207885
321621	28577	21164	31080	26724	35014	24285	9082	17751	37810												321621	0.981201	0.958705	0.964128	0.969738	0.958109	0.969107	0.968275	0.963235	0.96687		321621	0.966596	0.00692871	0.00230957
331621	28512	21132	31080	26691	35046	24253	9102	17751	37810												331621	0.978969	0.957255	0.964128	0.968541	0.958985	0.96783	0.970407	0.963235	0.96687		331621	0.966247	0.0064659	0.0021553
341621	28512	21164	31080	26724	35014	24253	9112	17783	37810												341621	0.978969	0.958705	0.964128	0.969738	0.958109	0.96783	0.971473	0.964971	0.96687		341621	0.966755	0.00643378	0.00214459
351621	28544	21164	31048	26691	34981	24285	9102	17751	37810												351621	0.980068	0.958705	0.963135	0.968541	0.957206	0.969107	0.970407	0.963235	0.96687		351621	0.966364	0.00688658	0.00229553
361621	28577	21132	31048	26659	35014	24220	9102	17751	37777												361621	0.981201	0.957255	0.963135	0.96738	0.958109	0.966514	0.970407	0.963235	0.966026		361621	0.965918	0.00713422	0.00237807
371621	28544	21197	31048	26691	35014	24318	9092	17783	37777												371621	0.980068	0.9602	0.963135	0.968541	0.958109	0.970424	0.969341	0.964971	0.966026		371621	0.966757	0.00647208	0.00215736
381621	28512	21132	31048	26659	34949	24253	9112	17783	37777												381621	0.978969	0.957255	0.963135	0.96738	0.95633	0.96783	0.971473	0.964971	0.966026		381621	0.96593	0.00691549	0.00230516
391621	28512	21132	31048	26724	34981	24285	9082	17751	37777												391621	0.978969	0.957255	0.963135	0.969738	0.957206	0.969107	0.968275	0.963235	0.966026		391621	0.965883	0.00676876	0.00225625
401621	28512	21099	31015	26659	34949	24253	9102	17783	37745												401621	0.978969	0.95576	0.962112	0.96738	0.95633	0.96783	0.970407	0.964971	0.965208		401621	0.965441	0.00711695	0.00237232
411621	28512	21132	31015	26691	34949	24220	9062	17718	37777												411621	0.978969	0.957255	0.962112	0.968541	0.95633	0.966514	0.966142	0.961444	0.966026		411621	0.964815	0.00678357	0.00226119
421621	28479	21132	31048	26659	34949	24253	9092	17751	37777												421621	0.977836	0.957255	0.963135	0.96738	0.95633	0.96783	0.969341	0.963235	0.966026		421621	0.965374	0.0065077	0.00216923
431621	28512	21099	31015	26659	34949	24253	9072	17751	37745												431621	0.978969	0.95576	0.962112	0.96738	0.95633	0.96783	0.967208	0.963235	0.965208		431621	0.964892	0.00694271	0.00231424
441621	28479	21132	31015	26691	35014	24220	9102	17751	37745												441621	0.977836	0.957255	0.962112	0.968541	0.958109	0.966514	0.970407	0.963235	0.965208		441621	0.965468	0.00638174	0.00212725
451621	28512	21099	31015	26659	34949	24253	9102	17751	37810												451621	0.978969	0.95576	0.962112	0.96738	0.95633	0.96783	0.970407	0.963235	0.96687		451621	0.965433	0.00717496	0.00239165
461621	28479	21099	30982	26626	34916	24285	9102	17751	37777												461621	0.977836	0.95576	0.961088	0.966182	0.955427	0.969107	0.970407	0.963235	0.966026		461621	0.965008	0.00714787	0.00238262
471621	28479	21067	30982	26691	34949	24285	9082	17751	37745												471621	0.977836	0.954311	0.961088	0.968541	0.95633	0.969107	0.968275	0.963235	0.965208		471621	0.964881	0.00718196	0.00239399
481621	28479	21132	30982	26659	34916	24253	9092	17751	37712												481621	0.977836	0.957255	0.961088	0.96738	0.955427	0.96783	0.969341	0.963235	0.964364		481621	0.964862	0.0067781	0.00225937
491621	28479	21099	30982	26659	34949	24253	9082	17751	37745												491621	0.977836	0.95576	0.961088	0.96738	0.95633	0.96783	0.968275	0.963235	0.965208		491621	0.964771	0.00677937	0.00225979
501621	28479	21099	30982	26691	34916	24220	9082	17718	37777												501621	0.977836	0.95576	0.961088	0.968541	0.955427	0.966514	0.968275	0.961444	0.966026		501621	0.964546	0.00702189	0.00234063
511621	28512	21132	30982	26659	34949	24253	9092	17718	37712												511621	0.978969	0.957255	0.961088	0.96738	0.95633	0.96783	0.969341	0.961444	0.964364		511621	0.964889	0.00699132	0.00233044
521621	28447	21099	30982	26659	34949	24220	9062	17751	37745												521621	0.976737	0.95576	0.961088	0.96738	0.95633	0.966514	0.966142	0.963235	0.965208		521621	0.964266	0.00633604	0.00211201
531621	28512	21067	30950	26659	34949	24253	9102	17718	37712												531621	0.978969	0.954311	0.960095	0.96738	0.95633	0.96783	0.970407	0.961444	0.964364		531621	0.96457	0.00760672	0.00253557
541621	28479	21067	30950	26659	34884	24285	9092	17751	37745												541621	0.977836	0.954311	0.960095	0.96738	0.954552	0.969107	0.969341	0.963235	0.965208		541621	0.964563	0.00754197	0.00251399
551621	28479	21099	30950	26659	34916	24253	9112	17751	37712												551621	0.977836	0.95576	0.960095	0.96738	0.955427	0.96783	0.971473	0.963235	0.964364		551621	0.964822	0.0072855	0.0024285
561621	28512	21099	30950	26659	34884	24253	9062	17718	37712												561621	0.978969	0.95576	0.960095	0.96738	0.954552	0.96783	0.966142	0.961444	0.964364		561621	0.96406	0.00736367	0.00245456
571621	28447	21132	30950	26626	34916	24220	9082	17751	37745												571621	0.976737	0.957255	0.960095	0.966182	0.955427	0.966514	0.968275	0.963235	0.965208		571621	0.964325	0.00639241	0.0021308
581621	28479	21099	30950	26659	34916	24220	9072	17783	37680												581621	0.977836	0.95576	0.960095	0.96738	0.955427	0.966514	0.967208	0.964971	0.963546		581621	0.964304	0.00685937	0.00228646
591621	28479	21067	30950	26659	34851	24188	9062	17718	37712												591621	0.977836	0.954311	0.960095	0.96738	0.953649	0.965237	0.966142	0.961444	0.964364		591621	0.963384	0.0073186	0.00243953
601621	28479	21067	30917	26626	34884	24253	9122	17718	37680												601621	0.977836	0.954311	0.959072	0.966182	0.954552	0.96783	0.972539	0.961444	0.963546		601621	0.964146	0.00788801	0.00262934
611621	28447	21099	30917	26626	34884	24253	9092	17718	37712												611621	0.976737	0.95576	0.959072	0.966182	0.954552	0.96783	0.969341	0.961444	0.964364		611621	0.96392	0.00705555	0.00235185
621621	28479	21099	30982	26659	34884	24253	9072	17718	37745												621621	0.977836	0.95576	0.961088	0.96738	0.954552	0.96783	0.967208	0.961444	0.965208		621621	0.964256	0.00707864	0.00235955
631621	28479	21067	30950	26594	34884	24253	9072	17751	37745												631621	0.977836	0.954311	0.960095	0.965021	0.954552	0.96783	0.967208	0.963235	0.965208		631621	0.963922	0.00722689	0.00240896
641621	28447	21034	30917	26626	34884	24253	9082	17718	37680												641621	0.976737	0.952816	0.959072	0.966182	0.954552	0.96783	0.968275	0.961444	0.963546		641621	0.963384	0.00743219	0.0024774
651621	28447	21067	30917	26626	34916	24188	9112	17751	37712												651621	0.976737	0.954311	0.959072	0.966182	0.955427	0.965237	0.971473	0.963235	0.964364		651621	0.964004	0.00721756	0.00240585
661621	28447	21067	30917	26594	34884	24220	9042	17718	37680												661621	0.976737	0.954311	0.959072	0.965021	0.954552	0.966514	0.96401	0.961444	0.963546		661621	0.962801	0.0068083	0.00226943
671621	28479	21034	30885	26626	34916	24188	9062	17718	37680												671621	0.977836	0.952816	0.958079	0.966182	0.955427	0.965237	0.966142	0.961444	0.963546		671621	0.962968	0.00735771	0.00245257
681621	28447	21099	30917	26659	34884	24188	9062	17718	37680												681621	0.976737	0.95576	0.959072	0.96738	0.954552	0.965237	0.966142	0.961444	0.963546		681621	0.963319	0.00674337	0.00224779
691621	28479	21099	30917	26626	34851	24188	9022	17718	37680												691621	0.977836	0.95576	0.959072	0.966182	0.953649	0.965237	0.961878	0.961444	0.963546		691621	0.962734	0.00701657	0.00233886
701621	28447	21067	30917	26626	34916	24220	9042	17685	37647												701621	0.976737	0.954311	0.959072	0.966182	0.955427	0.966514	0.96401	0.959654	0.962702		701621	0.962734	0.00681109	0.00227036
711621	28414	21067	30950	26626	34851	24220	9092	17685	37647												711621	0.975604	0.954311	0.960095	0.966182	0.953649	0.966514	0.969341	0.959654	0.962702		711621	0.963117	0.00710709	0.00236903
721621	28414	21067	30917	26594	34851	24220	9082	17718	37680												721621	0.975604	0.954311	0.959072	0.965021	0.953649	0.966514	0.968275	0.961444	0.963546		721621	0.963048	0.0069299	0.00230997
731621	28447	21067	30885	26626	34884	24188	9062	17685	37647												731621	0.976737	0.954311	0.958079	0.966182	0.954552	0.965237	0.966142	0.959654	0.962702		731621	0.962622	0.00702495	0.00234165
741621	28447	21067	30885	26561	34851	24188	9042	17718	37647												741621	0.976737	0.954311	0.958079	0.963823	0.953649	0.965237	0.96401	0.961444	0.962702		741621	0.962221	0.00688861	0.0022962
751621	28447	21067	30917	26594	34851	24188	9082	17685	37647												751621	0.976737	0.954311	0.959072	0.965021	0.953649	0.965237	0.968275	0.959654	0.962702		751621	0.962739	0.00719957	0.00239986
761621	28447	21067	30917	26594	34819	24188	9092	17685	37647												761621	0.976737	0.954311	0.959072	0.965021	0.952773	0.965237	0.969341	0.959654	0.962702		761621	0.962761	0.00745229	0.0024841
771621	28447	21067	30917	26561	34884	24220	9082	17685	37680												771621	0.976737	0.954311	0.959072	0.963823	0.954552	0.966514	0.968275	0.959654	0.963546		771621	0.962942	0.00710039	0.0023668
781621	28447	21034	30885	26594	34819	24188	9072	17685	37647												781621	0.976737	0.952816	0.958079	0.965021	0.952773	0.965237	0.967208	0.959654	0.962702		781621	0.962247	0.00753503	0.00251168
791621	28447	21034	30917	26561	34819	24188	9092	17685	37647												791621	0.976737	0.952816	0.959072	0.963823	0.952773	0.965237	0.969341	0.959654	0.962702		791621	0.962462	0.0076404	0.0025468
801621	28414	21034	30885	26626	34851	24188	9042	17718	37615												801621	0.975604	0.952816	0.958079	0.966182	0.953649	0.965237	0.96401	0.961444	0.961883		801621	0.9621	0.00695315	0.00231772
811621	28382	21067	30885	26561	34851	24188	9052	17718	37647												811621	0.974505	0.954311	0.958079	0.963823	0.953649	0.965237	0.965076	0.961444	0.962702		811621	0.962092	0.00636996	0.00212332
821621	28414	21034	30885	26594	34819	24188	9062	17685	37647												821621	0.975604	0.952816	0.958079	0.965021	0.952773	0.965237	0.966142	0.959654	0.962702		821621	0.962003	0.0071823	0.0023941
831621	28382	21067	30885	26561	34819	24220	9072	17718	37647												831621	0.974505	0.954311	0.958079	0.963823	0.952773	0.966514	0.967208	0.961444	0.962702		831621	0.962373	0.00676745	0.00225582
841621	28414	21034	30917	26528	34851	24188	9092	17685	37647												841621	0.975604	0.952816	0.959072	0.962626	0.953649	0.965237	0.969341	0.959654	0.962702		841621	0.9623	0.00722561	0.00240854
851621	28414	21034	30852	26561	34819	24155	9032	17653	37582												851621	0.975604	0.952816	0.957055	0.963823	0.952773	0.96392	0.962944	0.957917	0.96104		851621	0.960877	0.00701018	0.00233673
861621	28414	21002	30852	26594	34884	24188	9032	17653	37647												861621	0.975604	0.951366	0.957055	0.965021	0.954552	0.965237	0.962944	0.957917	0.962702		861621	0.961377	0.0071784	0.0023928
871621	28382	21034	30820	26561	34819	24188	9052	17685	37647												871621	0.974505	0.952816	0.956063	0.963823	0.952773	0.965237	0.965076	0.959654	0.962702		871621	0.961405	0.00695696	0.00231899
881621	28414	21034	30885	26561	34819	24188	9052	17685	37582												881621	0.975604	0.952816	0.958079	0.963823	0.952773	0.965237	0.965076	0.959654	0.96104		881621	0.961567	0.00705272	0.00235091
891621	28414	21034	30885	26561	34819	24155	9062	17718	37615												891621	0.975604	0.952816	0.958079	0.963823	0.952773	0.96392	0.966142	0.961444	0.961883		891621	0.961832	0.00701927	0.00233976
901621	28382	21002	30820	26561	34819	24188	9052	17685	37615												901621	0.974505	0.951366	0.956063	0.963823	0.952773	0.965237	0.965076	0.959654	0.961883		901621	0.961153	0.00717787	0.00239262
911621	28447	21034	30852	26561	34786	24155	9092	17685	37647												911621	0.976737	0.952816	0.957055	0.963823	0.95187	0.96392	0.969341	0.959654	0.962702		911621	0.961991	0.00786992	0.00262331
921621	28414	21002	30852	26561	34819	24155	9032	17685	37615												921621	0.975604	0.951366	0.957055	0.963823	0.952773	0.96392	0.962944	0.959654	0.961883		921621	0.961002	0.00717804	0.00239268
931621	28414	21034	30852	26528	34819	24188	9072	17685	37582												931621	0.975604	0.952816	0.957055	0.962626	0.952773	0.965237	0.967208	0.959654	0.96104		931621	0.961557	0.00725997	0.00241999
941621	28382	21002	30885	26561	34786	24155	9032	17653	37550												941621	0.974505	0.951366	0.958079	0.963823	0.95187	0.96392	0.962944	0.957917	0.960221		941621	0.960516	0.00702998	0.00234333
951621	28382	21034	30852	26528	34786	24188	9022	17685	37582												951621	0.974505	0.952816	0.957055	0.962626	0.95187	0.965237	0.961878	0.959654	0.96104		951621	0.960742	0.00680868	0.00226956
961621	28414	21034	30820	26528	34819	24123	9052	17620	37582												961621	0.975604	0.952816	0.956063	0.962626	0.952773	0.962643	0.965076	0.956127	0.96104		961621	0.96053	0.00721138	0.00240379
971621	28382	21002	30852	26528	34786	24155	9062	17620	37550												971621	0.974505	0.951366	0.957055	0.962626	0.95187	0.96392	0.966142	0.956127	0.960221		971621	0.960426	0.00735796	0.00245265
981621	28382	21034	30885	26561	34819	24155	9082	17685	37615												981621	0.974505	0.952816	0.958079	0.963823	0.952773	0.96392	0.968275	0.959654	0.961883		981621	0.961748	0.00700504	0.00233501
991621	28382	21002	30852	26496	34786	24188	9052	17685	37615												991621	0.974505	0.951366	0.957055	0.961465	0.95187	0.965237	0.965076	0.959654	0.961883		991621	0.960901	0.00717112	0.00239037
1001621	28382	21002	30852	26528	34786	24155	9022	17718	37582												1001621	0.974505	0.951366	0.957055	0.962626	0.95187	0.96392	0.961878	0.961444	0.96104		1001621	0.960634	0.00693763	0.00231254
1011621	28414	21002	30885	26528	34786	24188	9032	17620	37550												1011621	0.975604	0.951366	0.958079	0.962626	0.95187	0.965237	0.962944	0.956127	0.960221		1011621	0.960453	0.00744985	0.00248328
1021621	28382	20969	30852	26496	34786	24188	9042	17685	37582												1021621	0.974505	0.949871	0.957055	0.961465	0.95187	0.965237	0.96401	0.959654	0.96104		1021621	0.960523	0.00734967	0.00244989
1031621	28382	21002	30820	26528	34754	24155	9042	17653	37582												1031621	0.974505	0.951366	0.956063	0.962626	0.950994	0.96392	0.96401	0.957917	0.96104		1031621	0.960271	0.00728561	0.00242854
1041621	28349	21034	30820	26496	34786	24155	9022	17653	37582												1041621	0.973372	0.952816	0.956063	0.961465	0.95187	0.96392	0.961878	0.957917	0.96104		1041621	0.960038	0.00650447	0.00216816
1051621	28349	20969	30852	26496	34721	24155	9022	17653	37582												1051621	0.973372	0.949871	0.957055	0.961465	0.950091	0.96392	0.961878	0.957917	0.96104		1051621	0.959623	0.00718878	0.00239626
1061621	28349	20969	30820	26463	34786	24155	9032	17685	37550												1061621	0.973372	0.949871	0.956063	0.960267	0.95187	0.96392	0.962944	0.959654	0.960221		1061621	0.959798	0.00695434	0.00231811
1071621	28382	21002	30852	26496	34786	24155	9082	17653	37550												1071621	0.974505	0.951366	0.957055	0.961465	0.95187	0.96392	0.968275	0.957917	0.960221		1071621	0.960733	0.00746024	0.00248675
1081621	28382	21002	30852	26528	34721	24155	9032	17685	37550												1081621	0.974505	0.951366	0.957055	0.962626	0.950091	0.96392	0.962944	0.959654	0.960221		1081621	0.960265	0.00726512	0.00242171
1091621	28349	20969	30820	26528	34754	24155	9032	17620	37550												1091621	0.973372	0.949871	0.956063	0.962626	0.950994	0.96392	0.962944	0.956127	0.960221		1091621	0.959571	0.00726572	0.00242191
1101621	28349	21002	30787	26496	34721	24155	9022	17653	37517												1101621	0.973372	0.951366	0.955039	0.961465	0.950091	0.96392	0.961878	0.957917	0.959377		1101621	0.959381	0.00705739	0.00235246
1111621	28317	20937	30820	26496	34754	24123	9052	17620	37550												1111621	0.972273	0.948422	0.956063	0.961465	0.950994	0.962643	0.965076	0.956127	0.960221		1111621	0.959254	0.00729922	0.00243307
1121621	28382	21002	30820	26496	34786	24155	9042	17653	37517												1121621	0.974505	0.951366	0.956063	0.961465	0.95187	0.96392	0.96401	0.957917	0.959377		1121621	0.960055	0.00711361	0.0023712
1131621	28349	21002	30820	26496	34721	24155	9022	17653	37550												1131621	0.973372	0.951366	0.956063	0.961465	0.950091	0.96392	0.961878	0.957917	0.960221		1131621	0.959588	0.00699046	0.00233015
1141621	28349	20969	30820	26496	34721	24123	9032	17620	37517												1141621	0.973372	0.949871	0.956063	0.961465	0.950091	0.962643	0.962944	0.956127	0.959377		1141621	0.959106	0.00725496	0.00241832
1151621	28317	20969	30820	26463	34786	24155	9022	17653	37550												1151621	0.972273	0.949871	0.956063	0.960267	0.95187	0.96392	0.961878	0.957917	0.960221		1151621	0.959365	0.0066571	0.00221903
1161621	28382	20969	30787	26463	34786	24123	9032	17620	37517												1161621	0.974505	0.949871	0.955039	0.960267	0.95187	0.962643	0.962944	0.956127	0.959377		1161621	0.959183	0.00732117	0.00244039
1171621	28317	20969	30755	26496	34754	24090	9032	17653	37517												1171621	0.972273	0.949871	0.954046	0.961465	0.950994	0.961326	0.962944	0.957917	0.959377		1171621	0.958913	0.00685954	0.00228651
1181621	28382	20969	30852	26496	34721	24090	9032	17588	37582												1181621	0.974505	0.949871	0.957055	0.961465	0.950091	0.961326	0.962944	0.95439	0.96104		1181621	0.959187	0.00757479	0.00252493
1191621	28349	20969	30820	26496	34754	24155	9022	17620	37517												1191621	0.973372	0.949871	0.956063	0.961465	0.950994	0.96392	0.961878	0.956127	0.959377		1191621	0.95923	0.00715096	0.00238365
1201621	28349	21002	30787	26463	34721	24123	9062	17620	37485												1201621	0.973372	0.951366	0.955039	0.960267	0.950091	0.962643	0.966142	0.956127	0.958559		1201621	0.95929	0.00736094	0.00245365
1211621	28349	20969	30755	26496	34689	24123	9042	17620	37517												1211621	0.973372	0.949871	0.954046	0.961465	0.949216	0.962643	0.96401	0.956127	0.959377		1211621	0.958903	0.00760688	0.00253563
1221621	28349	21002	30755	26431	34721	24090	9042	17620	37517												1221621	0.973372	0.951366	0.954046	0.959106	0.950091	0.961326	0.96401	0.956127	0.959377		1221621	0.958758	0.00713378	0.00237793
1231621	28349	21002	30787	26496	34721	24123	9032	17685	37485												1231621	0.973372	0.951366	0.955039	0.961465	0.950091	0.962643	0.962944	0.959654	0.958559		1231621	0.959459	0.00701343	0.00233781
1241621	28317	21002	30787	26463	34689	24123	9052	17588	37517												1241621	0.972273	0.951366	0.955039	0.960267	0.949216	0.962643	0.965076	0.95439	0.959377		1241621	0.95885	0.00723587	0.00241196
1251621	28317	20969	30820	26463	34754	24090	9062	17620	37517												1251621	0.972273	0.949871	0.956063	0.960267	0.950994	0.961326	0.966142	0.956127	0.959377		1251621	0.95916	0.00705715	0.00235238
1261621	28349	20969	30787	26463	34689	24123	9042	17620	37517												1261621	0.973372	0.949871	0.955039	0.960267	0.949216	0.962643	0.96401	0.956127	0.959377		1261621	0.95888	0.00749629	0.00249876
1271621	28317	20937	30755	26463	34689	24123	9002	17620	37517												1271621	0.972273	0.948422	0.954046	0.960267	0.949216	0.962643	0.959745	0.956127	0.959377		1271621	0.958013	0.00727506	0.00242502
1281621	28317	20969	30755	26463	34754	24155	9002	17620	37517												1281621	0.972273	0.949871	0.954046	0.960267	0.950994	0.96392	0.959745	0.956127	0.959377		1281621	0.958514	0.00689906	0.00229969
1291621	28284	21002	30755	26431	34721	24090	9052	17620	37517												1291621	0.97114	0.951366	0.954046	0.959106	0.950091	0.961326	0.965076	0.956127	0.959377		1291621	0.958628	0.00669944	0.00223315
1301621	28349	21002	30787	26463	34689	24123	9002	17588	37485												1301621	0.973372	0.951366	0.955039	0.960267	0.949216	0.962643	0.959745	0.95439	0.958559		1301621	0.958289	0.00714645	0.00238215
1311621	28317	20937	30820	26463	34721	24123	9022	17620	37485												1311621	0.972273	0.948422	0.956063	0.960267	0.950091	0.962643	0.961878	0.956127	0.958559		1311621	0.95848	0.0071173	0.00237243
1321621	28317	21002	30787	26463	34721	24123	9042	17620	37485												1321621	0.972273	0.951366	0.955039	0.960267	0.950091	0.962643	0.96401	0.956127	0.958559		1321621	0.958931	0.00687288	0.00229096
1331621	28317	20969	30755	26463	34721	24123	9032	17555	37485												1331621	0.972273	0.949871	0.954046	0.960267	0.950091	0.962643	0.962944	0.952599	0.958559		1331621	0.958144	0.00731787	0.00243929
1341621	28317	20969	30755	26398	34656	24058	9022	17620	37517												1341621	0.972273	0.949871	0.954046	0.957909	0.948313	0.960049	0.961878	0.956127	0.959377		1341621	0.95776	0.00710114	0.00236705
1351621	28317	20937	30755	26463	34689	24058	9012	17588	37485												1351621	0.972273	0.948422	0.954046	0.960267	0.949216	0.960049	0.960811	0.95439	0.958559		1351621	0.957559	0.00722067	0.00240689
1361621	28284	20937	30755	26431	34689	24155	9052	17653	37452												1361621	0.97114	0.948422	0.954046	0.959106	0.949216	0.96392	0.965076	0.957917	0.957715		1361621	0.958506	0.00742731	0.00247577
1371621	28317	20937	30755	26463	34656	24090	9022	17555	37485												1371621	0.972273	0.948422	0.954046	0.960267	0.948313	0.961326	0.961878	0.952599	0.958559		1371621	0.95752	0.00761242	0.00253747
1381621	28317	20969	30722	26431	34689	24090	9012	17588	37485												1381621	0.972273	0.949871	0.953023	0.959106	0.949216	0.961326	0.960811	0.95439	0.958559		1381621	0.95762	0.00710608	0.00236869
1391621	28317	20937	30722	26431	34656	24090	9042	17620	37452												1391621	0.972273	0.948422	0.953023	0.959106	0.948313	0.961326	0.96401	0.956127	0.957715		1391621	0.957813	0.00763025	0.00254342
1401621	28317	20969	30755	26463	34721	24090	9052	17620	37452												1401621	0.972273	0.949871	0.954046	0.960267	0.950091	0.961326	0.965076	0.956127	0.957715		1401621	0.958533	0.00720496	0.00240165
1411621	28284	20904	30787	26463	34656	24058	9032	17588	37485												1411621	0.97114	0.946927	0.955039	0.960267	0.948313	0.960049	0.962944	0.95439	0.958559		1411621	0.957514	0.00744051	0.00248017
1421621	28349	20937	30755	26431	34656	24058	9022	17588	37452												1421621	0.973372	0.948422	0.954046	0.959106	0.948313	0.960049	0.961878	0.95439	0.957715		1421621	0.957477	0.00765362	0.00255121
1431621	28317	20937	30755	26431	34656	24058	9052	17620	37452												1431621	0.972273	0.948422	0.954046	0.959106	0.948313	0.960049	0.965076	0.956127	0.957715		1431621	0.957903	0.00761531	0.00253844
1441621	28317	20937	30755	26431	34689	24058	9012	17588	37485												1441621	0.972273	0.948422	0.954046	0.959106	0.949216	0.960049	0.960811	0.95439	0.958559		1441621	0.95743	0.00717647	0.00239216
1451621	28317	20937	30722	26431	34689	24090	9022	17588	37452												1451621	0.972273	0.948422	0.953023	0.959106	0.949216	0.961326	0.961878	0.95439	0.957715		1451621	0.957483	0.00737764	0.00245921
1461621	28317	20937	30787	26431	34689	24090	9052	17588	37452												1461621	0.972273	0.948422	0.955039	0.959106	0.949216	0.961326	0.965076	0.95439	0.957715		1461621	0.958063	0.00755673	0.00251891
1471621	28284	20937	30722	26366	34656	24090	8992	17555	37387												1471621	0.97114	0.948422	0.953023	0.956747	0.948313	0.961326	0.958679	0.952599	0.956053		1471621	0.956256	0.00708603	0.00236201
1481621	28284	20937	30722	26398	34689	24090	9002	17588	37420												1481621	0.97114	0.948422	0.953023	0.957909	0.949216	0.961326	0.959745	0.95439	0.956897		1481621	0.956896	0.00692593	0.00230864
1491621	28284	20937	30755	26431	34656	24090	9002	17588	37485												1491621	0.97114	0.948422	0.954046	0.959106	0.948313	0.961326	0.959745	0.95439	0.958559		1491621	0.957228	0.00704616	0.00234872
1501621	28284	20937	30722	26431	34689	24025	9012	17555	37452												1501621	0.97114	0.948422	0.953023	0.959106	0.949216	0.958732	0.960811	0.952599	0.957715		1501621	0.956752	0.00699314	0.00233105
1511621	28317	20904	30755	26398	34624	24058	9012	17588	37420												1511621	0.972273	0.946927	0.954046	0.957909	0.947437	0.960049	0.960811	0.95439	0.956897		1511621	0.956749	0.00763068	0.00254356
1521621	28252	20904	30690	26398	34656	24058	9042	17588	37420												1521621	0.970042	0.946927	0.95203	0.957909	0.948313	0.960049	0.96401	0.95439	0.956897		1521621	0.95673	0.00739207	0.00246402
1531621	28284	20969	30690	26398	34656	24090	9022	17555	37452												1531621	0.97114	0.949871	0.95203	0.957909	0.948313	0.961326	0.961878	0.952599	0.957715		1531621	0.956976	0.00719493	0.00239831
1541621	28284	20937	30755	26398	34689	24058	9012	17588	37387												1541621	0.97114	0.948422	0.954046	0.957909	0.949216	0.960049	0.960811	0.95439	0.956053		1541621	0.956893	0.0068475	0.0022825
1551621	28317	20904	30690	26398	34624	24090	9032	17588	37420												1551621	0.972273	0.946927	0.95203	0.957909	0.947437	0.961326	0.962944	0.95439	0.956897		1551621	0.956904	0.00800388	0.00266796
1561621	28284	20937	30690	26398	34624	24058	9022	17555	37452												1561621	0.97114	0.948422	0.95203	0.957909	0.947437	0.960049	0.961878	0.952599	0.957715		1561621	0.956575	0.00743177	0.00247726
1571621	28252	20904	30690	26431	34624	24058	9022	17555	37355												1571621	0.970042	0.946927	0.95203	0.959106	0.947437	0.960049	0.961878	0.952599	0.955235		1571621	0.956145	0.00742562	0.00247521
1581621	28284	20904	30722	26398	34656	24058	9032	17588	37420												1581621	0.97114	0.946927	0.953023	0.957909	0.948313	0.960049	0.962944	0.95439	0.956897		1581621	0.956843	0.00745615	0.00248538
1591621	28252	20904	30722	26366	34656	24058	9032	17555	37355												1591621	0.970042	0.946927	0.953023	0.956747	0.948313	0.960049	0.962944	0.952599	0.955235		1591621	0.956209	0.00728328	0.00242776
1601621	28252	20904	30690	26398	34656	24025	9032	17588	37387												1601621	0.970042	0.946927	0.95203	0.957909	0.948313	0.958732	0.962944	0.95439	0.956053		1601621	0.956371	0.0072026	0.00240087
1611621	28252	20904	30722	26366	34591	24058	9002	17588	37452												1611621	0.970042	0.946927	0.953023	0.956747	0.946534	0.960049	0.959745	0.95439	0.957715		1611621	0.95613	0.00719647	0.00239882
1621621	28252	20937	30722	26366	34624	24090	9002	17523	37387												1621621	0.970042	0.948422	0.953023	0.956747	0.947437	0.961326	0.959745	0.950863	0.956053		1621621	0.955962	0.00712488	0.00237496
1631621	28252	20937	30690	26366	34624	24058	9002	17555	37387												1631621	0.970042	0.948422	0.95203	0.956747	0.947437	0.960049	0.959745	0.952599	0.956053		1631621	0.955903	0.00694748	0.00231583
1641621	28284	20904	30722	26366	34591	24058	9052	17588	37420												1641621	0.97114	0.946927	0.953023	0.956747	0.946534	0.960049	0.965076	0.95439	0.956897		1641621	0.956754	0.00796576	0.00265525
1651621	28252	20937	30657	26398	34591	24058	8982	17555	37387												1651621	0.970042	0.948422	0.951006	0.957909	0.946534	0.960049	0.957613	0.952599	0.956053		1651621	0.955581	0.00708659	0.0023622
1661621	28219	20969	30657	26366	34624	24058	8992	17555	37387												1661621	0.968909	0.949871	0.951006	0.956747	0.947437	0.960049	0.958679	0.952599	0.956053		1661621	0.955706	0.00649391	0.00216464
1671621	28252	20904	30722	26366	34624	24058	9022	17555	37387												1671621	0.970042	0.946927	0.953023	0.956747	0.947437	0.960049	0.961878	0.952599	0.956053		1671621	0.956084	0.0072859	0.00242863
1681621	28252	20937	30722	26366	34591	24025	9012	17588	37355												1681621	0.970042	0.948422	0.953023	0.956747	0.946534	0.958732	0.960811	0.95439	0.955235		1681621	0.955993	0.00695891	0.00231964
1691621	28219	20904	30722	26366	34624	24058	9012	17555	37355												1691621	0.968909	0.946927	0.953023	0.956747	0.947437	0.960049	0.960811	0.952599	0.955235		1691621	0.955749	0.00691755	0.00230585
1701621	28252	20904	30690	26366	34591	24025	8992	17555	37387												1701621	0.970042	0.946927	0.95203	0.956747	0.946534	0.958732	0.958679	0.952599	0.956053		1701621	0.955372	0.00714197	0.00238066
1711621	28219	20904	30690	26366	34591	23993	8982	17588	37355												1711621	0.968909	0.946927	0.95203	0.956747	0.946534	0.957455	0.957613	0.95439	0.955235		1711621	0.955093	0.00666492	0.00222164
1721621	28284	20904	30657	26333	34559	24058	8982	17555	37387												1721621	0.97114	0.946927	0.951006	0.95555	0.945659	0.960049	0.957613	0.952599	0.956053		1721621	0.955177	0.0076494	0.0025498
1731621	28219	20937	30690	26301	34624	24025	8973	17523	37355												1731621	0.968909	0.948422	0.95203	0.954389	0.947437	0.958732	0.956654	0.950863	0.955235		1731621	0.954741	0.00648401	0.00216134
1741621	28252	20937	30690	26366	34559	24025	8992	17555	37355												1741621	0.970042	0.948422	0.95203	0.956747	0.945659	0.958732	0.958679	0.952599	0.955235		1741621	0.955349	0.00707852	0.00235951
1751621	28187	20872	30690	26366	34591	24058	8982	17523	37355												1751621	0.96781	0.945477	0.95203	0.956747	0.946534	0.960049	0.957613	0.950863	0.955235		1751621	0.954706	0.00695548	0.00231849
1761621	28219	20872	30657	26333	34526	24058	9022	17555	37387												1761621	0.968909	0.945477	0.951006	0.95555	0.944756	0.960049	0.961878	0.952599	0.956053		1761621	0.955142	0.0077847	0.0025949
1771621	28219	20872	30657	26333	34591	24058	8982	17523	37322												1771621	0.968909	0.945477	0.951006	0.95555	0.946534	0.960049	0.957613	0.950863	0.954391		1771621	0.954488	0.00724133	0.00241378
1781621	28219	20872	30690	26366	34591	24058	9012	17523	37290												1781621	0.968909	0.945477	0.95203	0.956747	0.946534	0.960049	0.960811	0.950863	0.953573		1781621	0.954999	0.00746734	0.00248911
1791621	28252	20904	30657	26366	34559	24025	9002	17523	37355												1791621	0.970042	0.946927	0.951006	0.956747	0.945659	0.958732	0.959745	0.950863	0.955235		1791621	0.954995	0.00751088	0.00250363
1801621	28252	20904	30657	26333	34591	24025	8992	17523	37355												1801621	0.970042	0.946927	0.951006	0.95555	0.946534	0.958732	0.958679	0.950863	0.955235		1801621	0.954841	0.00727799	0.002426
1811621	28219	20872	30690	26333	34591	23993	8982	17555	37355												1811621	0.968909	0.945477	0.95203	0.95555	0.946534	0.957455	0.957613	0.952599	0.955235		1811621	0.9546	0.00691155	0.00230385
1821621	28187	20904	30657	26366	34591	24025	9002	17523	37355												1821621	0.96781	0.946927	0.951006	0.956747	0.946534	0.958732	0.959745	0.950863	0.955235		1821621	0.954844	0.00683133	0.00227711
1831621	28219	20839	30657	26333	34591	24058	9002	17555	37355												1831621	0.968909	0.943983	0.951006	0.95555	0.946534	0.960049	0.959745	0.952599	0.955235		1831621	0.954846	0.00755287	0.00251762
1841621	28219	20872	30657	26333	34591	24025	8973	17523	37322												1841621	0.968909	0.945477	0.951006	0.95555	0.946534	0.958732	0.956654	0.950863	0.954391		1841621	0.954235	0.0070793	0.00235977
1851621	28219	20904	30657	26301	34591	24025	8963	17555	37290												1851621	0.968909	0.946927	0.951006	0.954389	0.946534	0.958732	0.955587	0.952599	0.953573		1851621	0.954251	0.00674198	0.00224733
1861621	28219	20872	30657	26333	34526	24025	9002	17523	37355												1861621	0.968909	0.945477	0.951006	0.95555	0.944756	0.958732	0.959745	0.950863	0.955235		1861621	0.954475	0.00755365	0.00251788
1871621	28252	20904	30625	26333	34591	24025	9012	17523	37322												1871621	0.970042	0.946927	0.950014	0.95555	0.946534	0.958732	0.960811	0.950863	0.954391		1871621	0.954874	0.00752749	0.00250916
1881621	28219	20872	30657	26333	34559	24058	9012	17523	37355												1881621	0.968909	0.945477	0.951006	0.95555	0.945659	0.960049	0.960811	0.950863	0.955235		1881621	0.95484	0.00761451	0.00253817
1891621	28219	20904	30625	26333	34559	23993	9032	17523	37322												1891621	0.968909	0.946927	0.950014	0.95555	0.945659	0.957455	0.962944	0.950863	0.954391		1891621	0.954746	0.00755881	0.0025196
1901621	28187	20904	30625	26333	34559	24025	8982	17523	37322												1901621	0.96781	0.946927	0.950014	0.95555	0.945659	0.958732	0.957613	0.950863	0.954391		1901621	0.954173	0.0068354	0.00227847
1911621	28252	20904	30657	26366	34559	24025	8982	17523	37322												1911621	0.970042	0.946927	0.951006	0.956747	0.945659	0.958732	0.957613	0.950863	0.954391		1911621	0.954664	0.00737325	0.00245775
1921621	28187	20904	30625	26301	34559	24025	8973	17555	37355												1921621	0.96781	0.946927	0.950014	0.954389	0.945659	0.958732	0.956654	0.952599	0.955235		1921621	0.954224	0.00669727	0.00223242
1931621	28187	20872	30625	26333	34559	24025	8982	17523	37322												1931621	0.96781	0.945477	0.950014	0.95555	0.945659	0.958732	0.957613	0.950863	0.954391		1931621	0.954012	0.00704146	0.00234715
1941621	28219	20872	30657	26301	34559	23993	9002	17523	37290												1941621	0.968909	0.945477	0.951006	0.954389	0.945659	0.957455	0.959745	0.950863	0.953573		1941621	0.954119	0.00731808	0.00243936
1951621	28187	20872	30625	26301	34559	23993	8992	17523	37290												1951621	0.96781	0.945477	0.950014	0.954389	0.945659	0.957455	0.958679	0.950863	0.953573		1951621	0.953769	0.00700305	0.00233435
1961621	28187	20872	30657	26268	34526	23993	9022	17490	37355												1961621	0.96781	0.945477	0.951006	0.953191	0.944756	0.957455	0.961878	0.949072	0.955235		1961621	0.953987	0.0075682	0.00252273
1971621	28219	20872	30657	26268	34559	23993	9032	17523	37322												1971621	0.968909	0.945477	0.951006	0.953191	0.945659	0.957455	0.962944	0.950863	0.954391		1971621	0.954433	0.0077001	0.0025667
1981621	28187	20872	30625	26333	34494	24025	8992	17523	37322												1981621	0.96781	0.945477	0.950014	0.95555	0.94388	0.958732	0.958679	0.950863	0.954391		1981621	0.953933	0.00740182	0.00246727
1991621	28187	20872	30657	26301	34559	24025	9002	17490	37290												1991621	0.96781	0.945477	0.951006	0.954389	0.945659	0.958732	0.959745	0.949072	0.953573		1991621	0.95394	0.00726182	0.00242061
2001621	28187	20872	30657	26301	34526	24025	9012	17523	37225												2001621	0.96781	0.945477	0.951006	0.954389	0.944756	0.958732	0.960811	0.950863	0.95191		2001621	0.953973	0.00742384	0.00247461

## Sheet: Fig3C timida
					Original data (arbitrary units)																Maxima													Normalized to maximum											Averaged data (shown in Fig. 3C)
Time (ms)	E timida 1	E timida 2	E timida 3	E timida 4	E timida 5	E timida 6	E timida 7	E timida 8	E timida 9	E timida 10	E timida 11	E timida 12	E timida 13		max1	max2	max3	max4	max5	max6	max7	max8	max9	max10	max11	max12	max13		Time (ms)	E timida 1	E timida 2	E timida 3	E timida 4	E timida 5	E timida 6	E timida 7	E timida 8	E timida 9	E timida 10	E timida 11	E timida 12	E timida 13		Time (ms)	Average	stdev	SE	n
11	260	260	260	292	260	260	260	260	260	260	260	260	260		28250.2	62508.9	24980.3	49586.4	40403	20329.5	49041.8	34450.4	54921.6	52046.6	76522.5	57793.4	42143		11	0.00920348	0.00415941	0.0104082	0.00588871	0.00643517	0.0127893	0.0053016	0.00754709	0.00473402	0.00499552	0.00339769	0.00449878	0.00616946		11	0.00657911	0.002732	0.000757721	13
21	6242	12386	5884	10631	12874	8582	14369	14955	16385	21067	26431	21782	15897																21	0.220954	0.198148	0.235546	0.214393	0.31864	0.422145	0.292995	0.434103	0.298334	0.404772	0.345402	0.376894	0.377215		21	0.318426	0.0826169	0.0229138
31	6502	13004	6144	11216	13557	9005	15280	15832	17295	22400	28056	23147	16873																31	0.230158	0.208035	0.245954	0.226191	0.335544	0.442952	0.311571	0.45956	0.314903	0.430383	0.366637	0.400513	0.400374		31	0.336367	0.0883378	0.0245005
41	6632	13264	6274	11541	13882	9233	15800	16288	17783	23147	28934	23928	17360																41	0.234759	0.212194	0.251158	0.232745	0.343588	0.454167	0.322174	0.472796	0.323789	0.444736	0.378111	0.414026	0.41193		41	0.34586	0.0916053	0.0254067
51	6762	13492	6339	11736	14239	9363	16353	16710	18238	23863	29747	24578	17848																51	0.239361	0.215841	0.25376	0.236678	0.352424	0.460562	0.33345	0.485045	0.332073	0.458493	0.388735	0.425273	0.42351		51	0.354247	0.0946539	0.0262523
61	6859	13719	6404	11964	14564	9558	16873	17100	18726	24513	30560	25293	18303																61	0.242795	0.219473	0.256362	0.241276	0.360468	0.470154	0.344053	0.496366	0.340959	0.470982	0.39936	0.437645	0.434307		61	0.362631	0.097892	0.0271504
71	6957	13979	6502	12224	14922	9720	17360	17523	19181	25163	31340	25943	18791																71	0.246264	0.223632	0.260285	0.246519	0.369329	0.478122	0.353984	0.508645	0.349243	0.48347	0.409553	0.448892	0.445886		71	0.371063	0.100841	0.0279683
81	7054	14174	6599	12484	15247	9883	17978	17913	19701	25813	32153	26626	19246																81	0.249697	0.226752	0.264168	0.251762	0.377373	0.48614	0.366585	0.519965	0.358711	0.495959	0.420177	0.46071	0.456683		81	0.379591	0.103792	0.0287869
[truncated: 450 more rows]

## Sheet: Fig3C Acetabularia
				Original data (arbitrary units)													Maxima												Normalized to maximum										Averaged data (shown in Fig. 3C)
[truncated: 459 more rows]
