# Supplementary material for: Photosynthetic sea slugs induce protective changes to the light reactions of the chloroplasts they steal from algae
Source: eLife. 2020 Oct 20;9:e57389. doi: 10.7554/eLife.57389 (PMC7679141; doi:10.7554/eLife.57389)
Supplement: Figure 4—figure supplement 1—source data 1. [file elife-57389-fig4-figsupp1-data1.xlsx]

## Sheet: Fig4_fig_suppl 2B
		Original data (P515 deltaI/I x10³)					After slope correction in Origin (baseline subtraction tool)								zero levels						zero levels set
time/ms	White slugs1	White slugs2	White slugs3	White slugs4	White slugs5		time/ms	White slugs1	White slugs2	White slugs3	White slugs4	White slugs5		White slugs1	White slugs2	White slugs3	White slugs4	White slugs5		time/ms	White slugs1	White slugs2	White slugs3	White slugs4	White slugs5
-198.9	-1.351	2.0963	-5.2975	-4.1128	0.744		-198.9	0.79629	-1.71757	0.98149	0	-0.40319		-0.0969145	0.187733	0.106479	0.119301	0.219781		-198.9	0.893205	-1.9053	0.875011	-0.119301	-0.622971
-196.8	-0.7947	2.0963	-6.297	-4.0137	-0.372		-196.8	1.35259	-1.71384	-0.01621	0.10195	-1.51585								-196.8	1.4495	-1.90157	-0.122689	-0.0173507	-1.73563
-194.7	-3.7351	4.9859	-6.5968	-5.0543	2.7279		-194.7	-1.58781	1.17949	-0.31421	-0.9358	1.58739								-194.7	-1.4909	0.991757	-0.420689	-1.0551	1.36761
-192.6	-3.2583	2.6629	-5.8472	-4.6579	3.0999		-192.6	-1.11101	-1.13977	0.43719	-0.53655	1.96273								-192.6	-1.0141	-1.3275	0.330711	-0.655851	1.74295
-190.5	-1.9073	3.0595	-6.7967	-3.4191	0		-190.5	0.23999	-0.73944	-0.51051	0.7051	-1.13383								-190.5	0.336905	-0.927173	-0.616989	0.585799	-1.35361
-188.4	-3.1788	4.2494	-6.197	-4.8066	-0.372		-188.4	-1.03151	0.45419	0.09099	-0.67955	-1.50249								-188.4	-0.934595	0.266457	-0.0154887	-0.798851	-1.72227
-186.3	0	4.136	-7.4964	-3.6173	0.744		-186.3	2.14729	0.34452	-1.20661	0.5126	-0.38315								-186.3	2.2442	0.156787	-1.31309	0.393299	-0.602931
-184.2	-1.9073	4.8726	-6.0971	-4.8066	-0.248		-184.2	0.23999	1.08486	0.1945	-0.67385	-1.37181								-184.2	0.336905	0.897127	0.0880213	-0.793151	-1.59159
-182.1	-1.1126	5.2692	-6.347	-3.8155	1.488		-182.1	1.03469	1.48519	-0.0536	0.3201	0.36754								-182.1	1.1316	1.29746	-0.160079	0.200799	0.147759
-180	-4.2119	3.5128	-5.5973	-3.9146	1.674		-180	-2.06461	-0.26748	0.6979	0.22385	0.55688								-180	-1.9677	-0.455213	0.591421	0.104549	0.337099
-177.9	-3.2583	3.5128	-6.297	-3.766	2.294		-177.9	-1.11101	-0.26374	0	0.3753	1.18022								-177.9	-1.0141	-0.451473	-0.106479	0.255999	0.960439
-175.8	-3.1788	3.5128	-7.0966	-5.748	1.736		-175.8	-1.03151	-0.26001	-0.7978	-1.60385	0.62556								-175.8	-0.934595	-0.447743	-0.904279	-1.72315	0.405779
-173.7	-1.1921	4.5893	-6.247	-4.5092	2.4799		-173.7	0.95519	0.82022	0.0536	-0.36221	1.3728								-173.7	1.0521	0.632487	-0.0528787	-0.481511	1.15302
-171.6	-2.0662	1.6997	-6.9966	-4.2615	3.1619		-171.6	0.08109	-2.06565	-0.6942	-0.11166	2.05814								-171.6	0.178005	-2.25338	-0.800679	-0.230961	1.83836
-169.5	-1.351	5.3259	-6.197	-4.0137	3.4099		-169.5	0.79629	1.56429	0.10721	0.13899	2.30948								-169.5	0.893205	1.37656	0.000731263	0.0196893	2.0897
-167.4	-2.7815	2.323	-6.7468	-3.6173	1.178		-167.4	-0.63421	-1.43488	-0.44079	0.53824	0.08092								-167.4	-0.537295	-1.62261	-0.547269	0.418939	-0.138861
-165.3	-2.3841	2.7196	-5.4474	-2.7254	0.248		-165.3	-0.23681	-1.03455	0.86041	1.43299	-0.84574								-165.3	-0.139895	-1.22228	0.753931	1.31369	-1.06552
-163.2	-1.0331	3.6261	-7.3465	-3.766	1.984		-163.2	1.11419	-0.12432	-1.03689	0.39524	0.8936								-163.2	1.2111	-0.312053	-1.14337	0.275939	0.673819
-161.1	-2.6225	4.0794	-5.8972	-5.6489	2.9759		-161.1	-0.47521	0.33272	0.41421	-1.48481	1.88884								-161.1	-0.378295	0.144987	0.307731	-1.60411	1.66906
-159	-0.9536	5.0992	-6.4469	-2.8245	0.682		-159	1.19369	1.35625	-0.13369	1.34244	-0.40172								-159	1.2906	1.16852	-0.240169	1.22314	-0.621501
-156.9	-2.9404	3.9094	-5.0476	-3.9642	1.24		-156.9	-0.79311	0.17018	1.26741	0.20559	0.15962								-156.9	-0.696195	-0.0175534	1.16093	0.0862893	-0.0601611
-154.8	-1.5894	3.7394	-4.9976	-3.2209	-0.496		-154.8	0.55789	0.00392	1.31922	0.95174	-1.57304								-154.8	0.654805	-0.183813	1.21274	0.832439	-1.79282
-152.7	-1.8278	3.1728	-5.5973	-2.5767	-0.744		-152.7	0.31949	-0.55895	0.72132	1.59879	-1.8177								-152.7	0.416405	-0.746683	0.614841	1.47949	-2.03748
-150.6	-2.2252	4.9292	-6.5469	-4.8066	-0.62		-150.6	-0.07791	1.20118	-0.22648	-0.62826	-1.69036								-150.6	0.0190045	1.01345	-0.332959	-0.747561	-1.91014
-148.5	-2.3841	6.8556	-8.0961	-4.4597	2.232		-148.5	-0.23681	3.13131	-1.77388	-0.27851	1.16498								-148.5	-0.139895	2.94358	-1.88036	-0.397811	0.945199
-146.4	-2.1457	3.2295	-7.2465	-5.3516	1.86		-146.4	0.00159	-0.49105	-0.92248	-1.16756	0.79633								-146.4	0.0985045	-0.678783	-1.02896	-1.28686	0.576549
-144.3	-4.5298	4.2494	-6.6968	-5.4012	1.736		-144.3	-2.38251	0.53258	-0.37098	-1.21431	0.67567								-144.3	-2.2856	0.344847	-0.477459	-1.33361	0.455889
-142.2	-0.7152	5.9491	-6.347	-2.4281	1.178		-142.2	1.43209	2.23601	-0.01938	1.76164	0.12101								-142.2	1.529	2.04828	-0.125859	1.64234	-0.0987711
-140.1	-2.702	3.8527	-4.148	-3.2209	1.302		-140.1	-0.55471	0.14334	2.18143	0.97169	0.24835								-140.1	-0.457795	-0.0443934	2.07495	0.852389	0.0285689
-138	-3.894	5.0426	-5.5473	-4.6579	2.4799		-138	-1.74671	1.33698	0.78393	-0.46246	1.42959								-138	-1.6498	1.14925	0.677451	-0.581761	1.20981
-135.9	-3.9735	6.1191	-5.9471	-3.9642	3.5959		-135.9	-1.82621	2.41721	0.38593	0.23409	2.54893								-135.9	-1.7293	2.22948	0.279451	0.114789	2.32915
-133.8	-3.8146	5.8924	-7.6963	-4.311	2.17		-133.8	-1.66731	2.19424	-1.36147	-0.10986	1.12637								-133.8	-1.5704	2.00651	-1.46795	-0.229161	0.906589
-131.7	-1.7483	5.4392	-6.8467	-3.4686	-0.124		-131.7	0.39899	1.74478	-0.51007	0.73539	-1.16429								-131.7	0.495905	1.55705	-0.616549	0.616089	-1.38407
-129.6	-2.2252	1.6997	-5.2975	-4.757	1.054		-129.6	-0.07791	-1.99099	1.04093	-0.55016	0.01705								-129.6	0.0190045	-2.17872	0.934451	-0.669461	-0.202731
-127.5	-2.3841	3.0029	-7.8462	-3.8651	1.922		-127.5	-0.23681	-0.68406	-1.50596	0.34459	0.88839								-127.5	-0.139895	-0.871793	-1.61244	0.225289	0.668609
-125.4	-4.6887	1.5864	-6.8967	-3.4191	0.806		-125.4	-2.54141	-2.09683	-0.55466	0.79344	-0.22427								-125.4	-2.4445	-2.28456	-0.661139	0.674139	-0.444051
-123.3	-2.9404	3.1162	-6.9966	-1.9325	1.86		-123.3	-0.79311	-0.56329	-0.65276	2.28288	0.83307								-123.3	-0.696195	-0.751023	-0.759239	2.16358	0.613289
-121.2	-4.8477	2.8896	-7.2465	-4.0633	2.294		-121.2	-2.70041	-0.78616	-0.90086	0.15493	1.27041								-121.2	-2.6035	-0.973893	-1.00734	0.0356293	1.05063
-119.1	-2.3841	3.8527	-5.1475	-6.0949	1.488		-119.1	-0.23681	0.18067	1.19994	-1.87382	0.46775								-119.1	-0.139895	-0.00706337	1.09346	-1.99312	0.247969
-117	2.543	2.6063	-5.8972	-4.5588	0.248		-117	4.69029	-1.06199	0.45204	-0.33487	-0.76891								-117	4.7872	-1.24972	0.345561	-0.454171	-0.988691
-114.9	-2.9404	5.9491	-5.5973	-3.9642	1.426		-114.9	-0.79311	2.28454	0.75374	0.26258	0.41243								-114.9	-0.696195	2.09681	0.647261	0.143279	0.192649
-112.8	-4.2119	4.1927	-6.6468	-2.874	2.5419		-112.8	-2.06461	0.53187	-0.29395	1.35563	1.53167								-112.8	-1.9677	0.344137	-0.400429	1.23633	1.31189
-110.7	-1.351	3.2862	-5.6473	-4.3606	0.558		-110.7	0.79629	-0.3709	0.70735	-0.12812	-0.44888								-110.7	0.893205	-0.558633	0.600871	-0.247421	-0.668661
-108.6	-4.1324	4.2494	-4.9976	-4.311	0.93		-108.6	-1.98511	0.59604	1.35885	-0.07567	-0.07354								-108.6	-1.8882	0.408307	1.25237	-0.194971	-0.293321
-106.5	-4.5298	2.6063	-5.5973	-3.1713	0.558		-106.5	-2.38251	-1.04333	0.76095	1.06688	-0.4422								-106.5	-2.2856	-1.23106	0.654471	0.947579	-0.661981
-104.4	-1.4305	1.3031	-7.6963	-4.311	-0.186		-104.4	0.71679	-2.3428	-1.33625	-0.06997	-1.18286								-104.4	0.813705	-2.53053	-1.44273	-0.189271	-1.40264
-102.3	-1.8278	2.7196	-6.6468	-2.1803	0.062		-102.3	0.31949	-0.92257	-0.28495	2.06358	-0.93152								-102.3	0.416405	-1.1103	-0.391429	1.94428	-1.1513
-100.2	-2.4636	4.8726	-5.4974	-1.883	-0.434		-100.2	-0.31631	1.23417	0.86625	2.36373	-1.42418								-100.2	-0.219395	1.04644	0.759771	2.24443	-1.64396
-98.1	-3.2583	4.0227	-8.4959	-4.5092	0.372		-98.1	-1.11101	0.388	-2.13044	-0.25962	-0.61484								-98.1	-1.0141	0.200267	-2.23692	-0.378921	-0.834621
-96	-3.6556	3.2295	-7.4464	-5.5994	2.046		-96	-1.50831	-0.40147	-1.07914	-1.34697	1.0625								-96	-1.4114	-0.589203	-1.18562	-1.46627	0.842719
-93.9	-3.4967	5.3825	-6.7468	-5.7976	0.248		-93.9	-1.34941	1.75527	-0.37774	-1.54232	-0.73216								-93.9	-1.2525	1.56754	-0.484219	-1.66162	-0.951941
-91.8	-5.4834	3.7394	-5.2475	-2.2298	0.93		-91.8	-3.33611	0.1159	1.12336	2.02833	-0.04682								-91.8	-3.2392	-0.0718334	1.01688	1.90903	-0.266601
-89.7	-2.1457	3.4561	-6.9966	-4.7075	1.488		-89.7	0.00159	-0.16367	-0.62394	-0.44652	0.51452								-89.7	0.0985045	-0.351403	-0.730419	-0.565821	0.294739
-87.6	-3.0993	4.5326	-5.8472	-4.2119	0.496		-87.6	-0.95201	0.91656	0.52726	0.05193	-0.47414								-87.6	-0.855095	0.728827	0.420781	-0.0673707	-0.693921
-85.5	-0.0795	4.306	-6.297	-4.2615	1.426		-85.5	2.06779	0.6937	0.07926	0.00518	0.4592								-85.5	2.1647	0.505967	-0.0272187	-0.114121	0.239419
-83.4	-1.9073	2.6063	-6.7468	-4.4597	4.7119		-83.4	0.23999	-1.00227	-0.36873	-0.19017	3.74844								-83.4	0.336905	-1.19	-0.475209	-0.309471	3.52866
-81.3	-1.1126	2.2097	-5.8472	-3.0722	1.674		-81.3	1.03469	-1.39514	0.53267	1.20018	0.71388								-81.3	1.1316	-1.58287	0.426191	1.08088	0.494099
-79.2	-0.0795	4.476	-5.2475	-4.9057	0.62		-79.2	2.06779	0.87489	1.13417	-0.63047	-0.33678								-79.2	2.1647	0.687157	1.02769	-0.749771	-0.556561
-77.1	-3.0199	2.8896	-5.7972	-5.1534	2.8519		-77.1	-0.87261	-0.70777	0.58627	-0.87532	1.89846								-77.1	-0.775695	-0.895503	0.479791	-0.994621	1.67868
-75	-3.9735	3.7394	-5.4974	-4.3606	0.93		-75	-1.82621	0.14576	0.88787	-0.07967	-0.02009								-75	-1.7293	-0.0419734	0.781391	-0.198971	-0.239871
-72.9	-2.1457	2.8896	-5.2975	-4.0633	1.612		-72.9	0.00159	-0.70031	1.08957	0.22047	0.66525								-72.9	0.0985045	-0.888043	0.983091	0.101169	0.445469
-70.8	-3.0199	5.3259	-5.3974	-4.9057	0.682		-70.8	-0.87261	1.73973	0.99147	-0.61908	-0.26141								-70.8	-0.775695	1.552	0.884991	-0.738381	-0.481191
-68.7	-3.4172	6.629	-4.3979	-5.3516	-0.372		-68.7	-1.26991	3.04656	1.99278	-1.06213	-1.31207								-68.7	-1.173	2.85883	1.8863	-1.18143	-1.53185
-66.6	-1.4305	3.0029	-5.2975	-4.0633	3.9059		-66.6	0.71679	-0.57581	1.09498	0.22902	2.96917								-66.6	0.813705	-0.763543	0.988501	0.109719	2.74939
-64.5	-2.3046	2.7762	-4.4978	-3.3695	0.744		-64.5	-0.15731	-0.79878	1.89648	0.92567	-0.18939								-64.5	-0.0603955	-0.986513	1.79	0.806369	-0.409171
-62.4	-2.1457	2.4363	-5.1975	-3.3695	1.55		-62.4	0.00159	-1.13494	1.19858	0.92852	0.61995								-62.4	0.0985045	-1.32267	1.0921	0.809219	0.400169
-60.3	-0.1589	3.1728	-6.0971	-4.6083	2.108		-60.3	1.98839	-0.39471	0.30078	-0.30743	1.18129								-60.3	2.0853	-0.582443	0.194301	-0.426731	0.961509
-58.2	-1.4305	2.3796	-5.0976	-3.6669	3.2859		-58.2	0.71679	-1.18418	1.30208	0.63682	2.36253								-58.2	0.813705	-1.37191	1.1956	0.517519	2.14275
-56.1	-1.7483	4.4193	-6.7967	-2.8245	2.4799		-56.1	0.39899	0.85926	-0.39521	1.48207	1.55987								-56.1	0.495905	0.671527	-0.501689	1.36277	1.34009
-54	-1.7483	5.3259	-3.3484	-4.9057	0		-54	0.39899	1.76959	3.05489	-0.59628	-0.91669								-54	0.495905	1.58186	2.94841	-0.715581	-1.13647
-51.9	-2.0662	2.8329	-6.4969	-2.5767	-0.186		-51.9	0.08109	-0.71968	-0.09181	1.73557	-1.09935								-51.9	0.178005	-0.907413	-0.198289	1.61627	-1.31913
-49.8	-2.543	1.8697	-4.8977	-3.4191	1.24		-49.8	-0.39571	-1.67915	1.50919	0.89602	0.32999								-49.8	-0.298795	-1.86688	1.40271	0.776719	0.110209
-47.7	-1.9868	4.5326	-6.3969	-5.5498	-0.62		-47.7	0.16049	0.98749	0.01179	-1.23183	-1.52667								-47.7	0.257405	0.799757	-0.0946887	-1.35113	-1.74645
-45.6	-3.9735	2.5496	-8.246	-4.311	-0.186		-45.6	-1.82621	-0.99178	-1.83551	0.00982	-1.08933								-45.6	-1.7293	-1.17951	-1.94199	-0.109481	-1.30911
-43.5	-3.6556	2.4363	-7.3965	-5.3516	1.86		-43.5	-1.50831	-1.10135	-0.98421	-1.02793	0.96001								-43.5	-1.4114	-1.28908	-1.09069	-1.14723	0.740229
-41.4	-0.3974	3.5695	-5.7472	-4.6579	2.356		-41.4	1.74989	0.03558	0.6669	-0.33138	1.45935								-41.4	1.8468	-0.152153	0.560421	-0.450681	1.23957
-39.3	-3.0199	4.2494	-7.1466	-5.1534	0.372		-39.3	-0.87261	0.71922	-0.7307	-0.82403	-0.52131								-39.3	-0.775695	0.531487	-0.837179	-0.943331	-0.741091
-37.2	-4.5298	6.5723	-6.9966	-2.5767	1.488		-37.2	-2.38251	3.04585	-0.5789	1.75552	0.59804								-37.2	-2.2856	2.85812	-0.685379	1.63622	0.378259
-35.1	-2.1457	5.4392	-7.5464	-4.8561	0.744		-35.1	0.00159	1.91648	-1.1269	-0.52103	-0.14262								-35.1	0.0985045	1.72875	-1.23338	-0.640331	-0.362401
-33	-0.2384	6.1757	-6.6468	-4.3606	1.488		-33	1.90889	2.65672	-0.2255	-0.02268	0.60472								-33	2.0058	2.46899	-0.331979	-0.141981	0.384939
-30.9	-1.5894	2.153	-7.4464	-5.0543	-0.062		-30.9	0.55789	-1.36225	-1.0233	-0.71353	-0.94194								-30.9	0.654805	-1.54998	-1.12978	-0.832831	-1.16172
-28.8	-0.3974	5.4392	-6.297	-4.0137	2.108		-28.8	1.74989	1.92768	0.1279	0.32992	1.2314								-28.8	1.8468	1.73995	0.0214213	0.210619	1.01162
-26.7	-0.3179	3.9094	-5.2975	-4.5092	-0.93		-26.7	1.82939	0.40161	1.12921	-0.16273	-1.80326								-26.7	1.9263	0.213877	1.02273	-0.282031	-2.02304
-24.6	2.6225	5.4392	-7.0966	-3.5678	0.248		-24.6	4.76979	1.93515	-0.66809	0.78152	-0.62192								-24.6	4.8667	1.74742	-0.774569	0.662219	-0.841701
-22.5	-1.1921	4.7593	-7.3965	-3.7164	1.054		-22.5	0.95519	1.25898	-0.96619	0.63576	0.18742								-22.5	1.0521	1.07125	-1.07267	0.516459	-0.0323611
-20.4	-1.5099	2.7196	-7.5464	-4.8066	1.55		-20.4	0.63739	-0.77699	-1.11429	-0.45159	0.68676								-20.4	0.734305	-0.964723	-1.22077	-0.570891	0.466979
-18.3	-3.0993	2.6629	-7.0466	-4.2119	0.682		-18.3	-0.95201	-0.82995	-0.61269	0.14596	-0.1779								-18.3	-0.855095	-1.01768	-0.719169	0.0266593	-0.397681
-16.2	0.7152	4.3627	-6.8467	-3.766	0.248		-16.2	2.86249	0.87358	-0.4112	0.59471	-0.60856								-16.2	2.9594	0.685847	-0.517679	0.475409	-0.828341
-14.1	-3.0199	4.0227	-6.5968	-4.3606	2.418		-14.1	-0.87261	0.53674	-0.16004	0.00296	1.56478								-14.1	-0.775695	0.349007	-0.266519	-0.116341	1.345
-12	-1.7483	3.3428	-6.347	-3.6669	0.248		-12	0.39899	-0.14076	0.09103	0.69951	-0.60188								-12	0.495905	-0.328493	-0.0154487	0.580209	-0.821661
-9.9	-1.5894	3.6828	-4.248	-3.7164	2.232		-9.9	0.55789	0.20163	2.1913	0.65286	1.38546								-9.9	0.654805	0.0138966	2.08482	0.533559	1.16568
-7.8	-3.0199	1.4731	-6.6468	-5.748	-1.364		-7.8	-0.87113	-2.00567	-0.20623	-1.37589	-2.2072								-7.8	-0.774215	-2.1934	-0.312709	-1.49519	-2.42698
-5.7	-4.2119	4.136	-6.6968	-3.1218	0.868		-5.7	-2.06092	0.65963	-0.25497	1.25316	0.02814								-5.7	-1.96401	0.471897	-0.361449	1.13386	-0.191641
-3.6	-0.4768	3.2862	-6.5968	-4.4101	3.1619		-3.6	1.67639	-0.18777	-0.1537	-0.03229	2.32538								-3.6	1.7733	-0.375503	-0.260179	-0.151591	2.1056
-1.5	-2.3841	5.2125	-5.4474	-5.5498	-0.434		-1.5	-0.22871	1.74093	0.99697	-1.16914	-1.26717								-1.5	-0.131795	1.5532	0.890491	-1.28844	-1.48695
0.6	-1.8278	3.6828	-6.247	-3.766	2.232		0.6	0.3298	0.21363	0.19863	0.61659	1.39895								0.6	0.426715	0.0258966	0.0921513	0.497289	1.17917
2.7	-3.2583	5.6091	-6.0971	-3.4686	1.488		2.7	-1.09849	2.14233	0.3498	0.91586	0.65485								2.7	-1.00158	1.9546	0.243321	0.796559	0.435069
4.8	-2.2252	3.2295	-6.297	-4.9552	-0.434		4.8	-0.06318	-0.23487	0.15117	-0.56888	-1.26725								4.8	0.0337345	-0.422603	0.0446913	-0.688181	-1.48703
6.9	-2.8609	4.4193	-5.8972	-4.6579	1.674		6.9	-0.69667	0.95733	0.55223	-0.26971	0.84065								6.9	-0.599755	0.769597	0.445751	-0.389011	0.620869
9	-4.6887	2.7196	-7.3965	-5.2525	1.302		9	-2.52226	-0.73997	-0.9458	-0.86245	0.46855								9	-2.42535	-0.927703	-1.05228	-0.981751	0.248769
11.1	-2.8609	3.0595	-5.5973	-2.3289	1.922		11.1	-0.69225	-0.39767	0.85467	2.06302	1.08845								11.1	-0.595335	-0.585403	0.748191	1.94372	0.868669
13.2	-0.4768	3.3995	-5.9971	-4.9552	1.24		13.2	1.69406	-0.05527	0.45614	-0.56142	0.40635								13.2	1.79097	-0.243003	0.349661	-0.680721	0.186569
15.3	-2.702	3.8527	-5.2975	-4.2119	-0.062		15.3	-0.52893	0.40033	1.157	0.18375	-0.89575								15.3	-0.432015	0.212597	1.05052	0.0644493	-1.11553
17.4	-2.0662	2.3796	-6.4469	-2.3785	-0.93		17.4	0.10908	-1.07037	0.00887	2.01902	-1.76385								17.4	0.205995	-1.2581	-0.0976087	1.89972	-1.98363
19.5	-2.8609	5.8924	-6.6968	-2.3785	2.7899		19.5	-0.68341	2.44482	-0.23976	2.02088	1.95596								19.5	-0.586495	2.25709	-0.346239	1.90158	1.73618
21.6	0.3974	1.3598	-7.8962	-6.2436	0.992		21.6	2.5771	-2.08538	-1.4379	-1.84235	0.15796								21.6	2.67401	-2.27311	-1.54438	-1.96165	-0.0618211
23.7	-2.3841	3.0595	-6.3969	-3.9146	2.108		23.7	-0.2022	-0.38328	0.06267	0.48851	1.27386								23.7	-0.105285	-0.571013	-0.0438087	0.369209	1.05408
25.8	-4.2119	3.2862	-4.9976	-5.8471	2.356		25.8	-2.02779	-0.15418	1.46324	-1.44212	1.52176								25.8	-1.93088	-0.341913	1.35676	-1.56142	1.30198
27.9	-2.9404	5.1559	-7.2965	-6.5904	3.0999		27.9	-0.75408	1.71792	-0.8344	-2.18356	2.26556								27.9	-0.657165	1.53019	-0.940879	-2.30286	2.04578
30	-4.8477	4.476	-6.4969	-3.6669	2.17		30	-2.65917	1.04042	-0.03353	0.74181	1.33556								30	-2.56226	0.852687	-0.140009	0.622509	1.11578
32.1	-2.4636	4.0794	-5.5473	-5.2525	3.2239		32.1	-0.27286	0.64622	0.91734	-0.84192	2.38936								32.1	-0.175945	0.458487	0.810861	-0.961221	2.16958
34.2	-3.9735	3.2295	-4.9476	-4.5588	1.488		34.2	-1.78055	-0.20128	1.51831	-0.14636	0.65336								34.2	-1.68364	-0.389013	1.41183	-0.265661	0.433579
36.3	-5.7219	3.8527	-7.2465	-2.7749	1.984		36.3	-3.52674	0.42432	-0.77933	1.63941	1.14926								36.3	-3.42983	0.236587	-0.885809	1.52011	0.929479
38.4	-3.7351	2.3796	-8.0961	-4.2615	-0.434		38.4	-1.53773	-1.04638	-1.62766	0.15467	-1.26884								38.4	-1.44082	-1.23411	-1.73414	0.0353693	-1.48862
40.5	-1.2715	0.7932	-5.6473	-5.748	-0.62		40.5	0.92808	-2.63038	0.82241	-1.32996	-1.45494								40.5	1.02499	-2.81811	0.715931	-1.44926	-1.67472
42.6	-1.2715	3.7394	-6.347	-3.1218	-0.248		42.6	0.93029	0.31822	0.12397	1.2981	-1.08304								42.6	1.0272	0.130487	0.0174913	1.1788	-1.30282
44.7	-0.1589	3.9661	-5.5473	-4.3606	0.31		44.7	2.0451	0.54732	0.92494	0.06117	-0.52514								44.7	2.14201	0.359587	0.818461	-0.0581307	-0.744921
46.8	-2.543	3.9661	-5.8472	-3.766	1.488		46.8	-0.33679	0.54972	0.62631	0.65764	0.65276								46.8	-0.239875	0.361987	0.519831	0.538339	0.432979
48.9	-0.7947	2.3796	-6.0471	-4.5092	1.116		48.9	1.41371	-1.03439	0.42768	-0.0837	0.28067								48.9	1.51062	-1.22212	0.321201	-0.203001	0.0608889
51	-2.2252	2.7762	-6.197	-5.6985	2.17		51	-0.01458	-0.63539	0.27904	-1.27113	1.33457								51	0.0823345	-0.823123	0.172561	-1.39043	1.11479
53.1	-4.3709	3.6828	-5.3474	-5.8471	0.434		53.1	-2.15807	0.27361	1.12991	-1.41787	-0.40153								53.1	-2.06116	0.0858766	1.02343	-1.53717	-0.621311
55.2	-1.5894	2.9462	-5.2475	-4.6083	-0.62		55.2	0.62564	-0.46059	1.23108	-0.1772	-1.45563								55.2	0.722555	-0.648323	1.1246	-0.296501	-1.67541
57.3	-2.7815	4.3627	-8.4459	-3.1713	1.798		57.3	-0.56425	0.95831	-1.96606	1.26166	0.96227								57.3	-0.467335	0.770577	-2.07254	1.14236	0.742489
59.4	-1.8278	2.8896	-7.3465	-4.2119	1.426		59.4	0.39166	-0.51239	-0.86539	0.22293	0.59017								59.4	0.488575	-0.700123	-0.971869	0.103629	0.370389
61.5	-3.7351	4.0227	-6.8467	-4.3606	0.31		61.5	-1.51343	0.62311	-0.36432	0.07609	-0.52593								61.5	-1.41652	0.435377	-0.470799	-0.0432107	-0.745711
63.6	-2.9404	3.4561	-7.0466	-3.5182	0.186		63.6	-0.71652	0.05891	-0.56296	0.92036	-0.65003								63.6	-0.619605	-0.128823	-0.669439	0.801059	-0.869811
65.7	-0.8742	3.0595	-5.4474	-5.9463	-0.682		65.7	1.35189	-0.33529	1.03751	-1.50587	-1.51813								65.7	1.4488	-0.523023	0.931031	-1.62517	-1.73791
67.8	-1.351	3.1728	-6.347	-4.0633	2.17		67.8	0.8773	-0.21959	0.13918	0.37899	1.33377								67.8	0.974215	-0.407323	0.0327013	0.259689	1.11399
69.9	-2.9404	2.6629	-6.197	-3.4686	2.8519		69.9	-0.70989	-0.72709	0.29045	0.97556	2.01557								69.9	-0.612975	-0.914823	0.183971	0.856259	1.79579
72	-3.8146	3.7961	-6.347	-3.5182	1.922		72	-1.58188	0.40851	0.14171	0.92782	1.08557								72	-1.48497	0.220777	0.0352313	0.808519	0.865789
74.1	-2.3046	5.0992	-6.6968	-4.1624	0.806		74.1	-0.06968	1.71401	-0.20682	0.28549	-0.03053								74.1	0.0272345	1.52628	-0.313299	0.166189	-0.250311
76.2	-4.3709	5.3259	-6.6468	-3.6173	1.116		76.2	-2.13377	1.94311	-0.15555	0.83245	0.27937								76.2	-2.03686	1.75538	-0.262029	0.713149	0.0595889
78.3	-4.3709	3.1162	-7.2465	-5.1039	0.496		78.3	-2.13156	-0.2642	-0.75399	-0.65228	-0.34072								78.3	-2.03465	-0.451933	-0.860469	-0.771581	-0.560501
80.4	-4.2914	5.6091	-8.5459	-5.2525	0.31		80.4	-2.04985	2.2311	-2.05212	-0.79901	-0.52682								80.4	-1.95294	2.04337	-2.1586	-0.918311	-0.746601
82.5	-1.1126	3.6828	-5.7472	-4.4101	-1.302		82.5	1.13116	0.3072	0.74785	0.04525	-2.13892								82.5	1.22807	0.119467	0.641371	-0.0740507	-2.3587
84.6	-2.543	2.8329	-7.5964	-3.5678	1.86		84.6	-0.29703	-0.5403	-1.10008	0.88942	1.02298								84.6	-0.200115	-0.728033	-1.20656	0.770119	0.803199
86.7	-1.0331	4.136	-4.6478	-5.0543	-0.248		86.7	1.21508	0.7652	1.84978	-0.59522	-1.08512								86.7	1.31199	0.577467	1.7433	-0.714521	-1.3049
88.8	-2.6225	5.2692	-7.7463	-4.757	2.17		88.8	-0.37211	1.9008	-1.24745	-0.29605	1.33278								88.8	-0.275195	1.71307	-1.35393	-0.415351	1.113
90.9	-1.0331	3.5695	-7.4964	-4.0137	2.17		90.9	1.2195	0.2035	-0.99628	0.44911	1.33268								90.9	1.31641	0.0157666	-1.10276	0.329809	1.1129
93	-2.9404	1.8131	-6.4969	-3.4686	0.186		93	-0.68559	-1.5505	0.00448	0.99608	-0.65142								93	-0.588675	-1.73823	-0.101999	0.876779	-0.871201
95.1	-1.351	0.9065	-6.4969	-6.4418	-0.558		95.1	0.90602	-2.4547	0.00575	-1.97525	-1.39552								95.1	1.00293	-2.64243	-0.100729	-2.09455	-1.6153
97.2	-2.6225	4.1927	-6.1471	-5.0048	0.186		97.2	-0.36327	0.8339	0.35682	-0.53639	-0.65162								97.2	-0.266355	0.646167	0.250341	-0.655691	-0.871401
99.3	-2.3841	4.3627	-7.5964	-2.8245	0.62		99.3	-0.12267	1.0063	-1.09122	1.64578	-0.21772								99.3	-0.0257555	0.818567	-1.1977	1.52648	-0.437501
101.4	-2.702	3.5128	-6.8967	-3.7164	1.24		101.4	-0.43836	0.1588	-0.39025	0.75574	0.40218								101.4	-0.341445	-0.0289334	-0.496729	0.636439	0.182399
103.5	-1.6689	3.9661	-6.3969	-3.4686	-0.434		103.5	0.59695	0.6145	0.11082	1.00541	-1.27192								103.5	0.693865	0.426767	0.00434126	0.886109	-1.4917
105.6	-1.4305	1.7564	-6.6468	-5.4507	-0.062		105.6	0.83756	-1.5928	-0.13781	-0.97483	-0.90002								105.6	0.934475	-1.78053	-0.244289	-1.09413	-1.1198
107.7	-1.2715	2.493	-7.4464	-4.6083	0.806		107.7	0.99877	-0.85381	-0.93615	-0.13056	-0.03211								107.7	1.09568	-1.04154	-1.04263	-0.249861	-0.251891
109.8	1.351	1.1332	-5.6473	-4.4597	-0.62		109.8	3.62348	-2.21121	0.86422	0.01991	-1.45821								109.8	3.72039	-2.39894	0.757741	-0.0993907	-1.67799
111.9	0.3974	4.0794	-7.3965	-3.2704	2.232		111.9	2.67209	0.73739	-0.88371	1.21107	1.39369								111.9	2.769	0.549657	-0.990189	1.09177	1.17391
114	-3.3377	2.6629	-5.2975	-3.4191	2.5419		114	-1.0608	-0.67671	1.21655	1.06424	1.70349								114	-0.963885	-0.864443	1.11007	0.944939	1.48371
116.1	-3.0199	4.9859	-8.9957	-3.4686	1.364		116.1	-0.74079	1.64869	-2.48038	1.0166	0.52549								116.1	-0.643875	1.46096	-2.58686	0.897299	0.305709
118.2	0.3974	3.9661	-8.246	-5.203	2.7899		118.2	2.67872	0.63129	-1.72941	-0.71593	1.95129								118.2	2.77563	0.443557	-1.83589	-0.835231	1.73151
120.3	-2.6225	1.7564	-5.2975	-2.5272	1.364		120.3	-0.33897	-1.57601	1.22036	1.96173	0.52529								120.3	-0.242055	-1.76374	1.11388	1.84243	0.305509
122.4	-1.8278	5.1559	-5.3474	-4.9552	0.992		122.4	0.45794	1.82589	1.17172	-0.4644	0.15319								122.4	0.554855	1.63816	1.06524	-0.583701	-0.0665911
124.5	-4.1324	5.4392	-5.6473	-3.8651	-0.186		124.5	-1.84446	2.11159	0.87309	0.62757	-1.02491								124.5	-1.74755	1.92386	0.766611	0.508269	-1.24469
126.6	-2.702	2.493	-7.0466	-3.8155	1.302		126.6	-0.41185	-0.83221	-0.52494	0.67903	0.46299								126.6	-0.314935	-1.01994	-0.631419	0.559729	0.243209
128.7	0.2384	3.6261	-6.7468	-5.1039	1.488		128.7	2.53076	0.30329	-0.22388	-0.6075	0.64889								128.7	2.62767	0.115557	-0.330359	-0.726801	0.429109
130.8	-4.6093	4.9292	-8.0461	-3.4191	1.55		130.8	-2.31473	1.60879	-1.52191	1.07916	0.71079								130.8	-2.21782	1.42106	-1.62839	0.959859	0.491009
132.9	-1.2715	4.4193	-5.9471	-5.4507	0.62		132.9	1.02528	1.10129	0.57836	-0.95057	-0.21931								132.9	1.12219	0.913557	0.471881	-1.06987	-0.439091
135	-3.3377	2.7762	-5.8972	-3.4686	1.55		135	-1.03871	-0.53942	0.62952	1.03339	0.7106								135	-0.941795	-0.727153	0.523041	0.914089	0.490819
137.1	-1.351	2.0963	-7.6463	-3.8155	1.736		137.1	0.9502	-1.21692	-1.11831	0.68836	0.8965								137.1	1.04711	-1.40465	-1.22479	0.569059	0.676719
139.2	0.6358	5.6091	-8.7458	-5.5498	1.302		139.2	2.93921	2.29828	-2.21654	-1.04407	0.4624								139.2	3.03612	2.11055	-2.32302	-1.16337	0.242619
141.3	-3.0199	2.6063	-6.5469	-3.3695	1.86		141.3	-0.71428	-0.70212	-0.01637	1.13809	1.0203								141.3	-0.617365	-0.889853	-0.122849	1.01879	0.800519
143.4	-2.6225	1.8697	-6.9467	-2.874	-0.248		143.4	-0.31467	-1.43632	-0.41491	1.63546	-1.0878								143.4	-0.217755	-1.62405	-0.521389	1.51616	-1.30758
145.5	-4.8477	3.1728	-6.6968	-6.5409	3.4099		145.5	-2.53766	-0.13082	-0.16374	-2.02958	2.57								145.5	-2.44075	-0.318553	-0.270219	-2.14888	2.35022
147.6	-0.5563	2.9462	-7.6463	-3.7164	1.426		147.6	1.75595	-0.35502	-1.11197	0.79679	0.586								147.6	1.85286	-0.542753	-1.21845	0.677489	0.366219
149.7	1.351	3.9094	-8.4459	-6.5409	1.302		149.7	3.66545	0.61058	-1.91031	-2.02585	0.4619								149.7	3.76236	0.422847	-2.01679	-2.14515	0.242119
151.8	-0.5563	2.8329	-6.9467	-5.0048	-1.24		151.8	1.76036	-0.46352	-0.40984	-0.48788	-2.0802								151.8	1.85727	-0.651253	-0.516319	-0.607181	-2.29998
153.9	-1.7483	2.6629	-6.197	-4.2615	0.93		153.9	0.57057	-0.63112	0.34113	0.25729	0.0897								153.9	0.667485	-0.818853	0.234651	0.137989	-0.130081
156	-0.7947	2.8329	-7.1965	-5.0048	0.93		156	1.52638	-0.45872	-0.6571	-0.48415	0.0896								156	1.62329	-0.646453	-0.763579	-0.603451	-0.130181
158.1	-0.4768	3.1162	-7.4464	-6.64	1.798		158.1	1.84649	-0.17302	-0.90574	-2.11748	0.9575								158.1	1.9434	-0.360753	-1.01222	-2.23678	0.737719
160.2	-0.8742	5.5525	-5.9971	-5.8471	-0.62		160.2	1.4513	2.26568	0.54483	-1.32272	-1.4606								160.2	1.54821	2.07795	0.438351	-1.44202	-1.68038
162.3	1.351	1.8697	-6.0971	-6.0949	1.488		162.3	3.67871	-1.41472	0.4461	-1.56865	0.6473								162.3	3.77562	-1.60245	0.339621	-1.68795	0.427519
164.4	-4.2119	4.2494	-6.9966	-3.7164	-0.434		164.4	-1.88198	0.96737	-0.45214	0.81171	-1.27479								164.4	-1.78507	0.779637	-0.558619	0.692409	-1.49457
166.5	0.5563	3.1162	-6.1471	-4.7075	0.248		166.5	2.88843	-0.16343	0.39863	-0.17752	-0.59289								166.5	2.98534	-0.351163	0.292151	-0.296821	-0.812671
168.6	-3.1788	0.0567	-6.8967	-5.1039	2.418		168.6	-0.84446	-3.22053	-0.3497	-0.57206	1.57701								168.6	-0.747545	-3.40826	-0.456179	-0.691361	1.35723
170.7	-0.4768	2.323	-4.7977	-5.0048	-0.868		170.7	1.85975	-0.95183	1.75056	-0.47109	-1.70909								170.7	1.95666	-1.13956	1.64408	-0.590391	-1.92887
172.8	-4.2119	3.6261	-5.8472	-4.1128	0.372		172.8	-1.87314	0.35367	0.70233	0.42278	-0.46919								172.8	-1.77623	0.165937	0.595851	0.303479	-0.688971
174.9	-0.6358	3.6828	-6.5469	-4.757	0.31		174.9	1.70516	0.41277	0.0039	-0.21956	-0.53129								174.9	1.80207	0.225037	-0.102579	-0.338861	-0.751071
177	1.7483	3.4561	-4.9976	-2.9236	0.124		177	4.09147	0.18847	1.55447	1.61571	-0.71739								177	4.18838	0.000736632	1.44799	1.49641	-0.937171
179.1	-3.4967	1.6997	-6.3969	-3.5182	0.93		179.1	-1.15132	-1.56553	0.15643	1.02297	0.08851								179.1	-1.05441	-1.75326	0.0499513	0.903669	-0.131271
181.2	-2.7815	3.6828	-7.7463	-5.5003	1.054		181.2	-0.43391	0.41997	-1.1917	-0.95726	0.21241								181.2	-0.336995	0.232237	-1.29818	-1.07656	-0.00737105
183.3	-3.5762	3.0595	-6.7967	-5.5994	-0.372		183.3	-1.2264	-0.20093	-0.24083	-1.0545	-1.21369								183.3	-1.12949	-0.388663	-0.347309	-1.1738	-1.43347
185.4	-3.7351	4.0794	-5.9471	-5.6489	-0.62		185.4	-1.38309	0.82137	0.61003	-1.10213	-1.46179								185.4	-1.28618	0.633637	0.503551	-1.22143	-1.68157
187.5	-1.2715	1.4731	-6.3969	-4.0137	0.062		187.5	1.08272	-1.78253	0.1615	0.53494	-0.77989								187.5	1.17963	-1.97026	0.0550213	0.415639	-0.999671
189.6	-2.0662	2.4363	-7.8962	-4.0633	1.612		189.6	0.29023	-0.81693	-1.33653	0.4872	0.77001								189.6	0.387145	-1.00466	-1.44301	0.367899	0.550229
191.7	-1.1126	1.8131	-7.6963	-3.9146	-0.496		191.7	1.24604	-1.43773	-1.13536	0.63777	-1.33809								191.7	1.34295	-1.62546	-1.24184	0.518469	-1.55787
193.8	-3.5762	4.5893	-7.8462	-5.5994	0.062		193.8	-1.21535	1.34086	-1.284	-1.04517	-0.78018								193.8	-1.11844	1.15313	-1.39048	-1.16447	-0.999961
195.9	-3.8146	3.7961	-6.247	-4.2615	1.922		195.9	-1.45154	0.55006	0.31647	0.2946	1.07972								195.9	-1.35463	0.362327	0.209991	0.175299	0.859939
198	-3.9735	2.493	-8.0461	-5.3516	2.046		198	-1.60823	-0.75064	-1.48136	-0.79364	1.20362								198	-1.51132	-0.938373	-1.58784	-0.912941	0.983839
200.1	-2.543	3.3428	-3.9481	-5.0543	2.6659		200.1	-0.17553	0.10156	2.6179	-0.49447	1.82342								200.1	-0.0786155	-0.0861734	2.51142	-0.613771	1.60364
202.2	-3.3377	4.136	-6.8467	-4.5092	-1.24		202.2	-0.96802	0.89716	-0.27943	0.0525	-2.08258								202.2	-0.871105	0.709427	-0.385909	-0.0668007	-2.30236
204.3	-2.1457	3.8527	-6.9966	-4.2615	2.7899		204.3	0.22619	0.61626	-0.42806	0.30206	1.94722								204.3	0.323105	0.428527	-0.534539	0.182759	1.72744
206.4	0.0795	1.1898	-7.4464	-5.0048	-1.488		206.4	2.4536	-2.04424	-0.8766	-0.43937	-2.33078								206.4	2.55051	-2.23197	-0.983079	-0.558671	-2.55056
208.5	-1.1126	2.6063	-5.7972	-4.6579	1.054		208.5	1.26371	-0.62534	0.77387	-0.09061	0.21112								208.5	1.36062	-0.813073	0.667391	-0.209911	-0.00866105
210.6	-0.0795	4.0227	-5.3974	-3.8155	0.744		210.6	2.29902	0.79346	1.17494	0.75366	-0.09898								210.6	2.39593	0.605727	1.06846	0.634359	-0.318761
212.7	-3.4967	1.9264	-7.8962	-7.5319	2.5419		212.7	-1.11597	-1.30044	-1.32259	-2.96088	1.69882								212.7	-1.01906	-1.48817	-1.42907	-3.08018	1.47904
214.8	-2.0662	2.323	-8.346	-5.0048	1.364		214.8	0.31674	-0.90144	-1.77113	-0.43191	0.52082								214.8	0.413655	-1.08917	-1.87761	-0.551211	0.301039
216.9	-2.1457	2.4363	-7.2965	-3.1713	1.054		216.9	0.23945	-0.78574	-0.72036	1.40346	0.21072								216.9	0.336365	-0.973473	-0.826839	1.28416	-0.00906105
219	-1.2715	2.6629	-6.4469	-5.5498	1.24		219	1.11586	-0.55674	0.13051	-0.97318	0.39662								219	1.21277	-0.744473	0.0240313	-1.09248	0.176839
221.1	-0.1589	3.9661	-5.9971	-5.5003	-0.31		221.1	2.23067	0.74886	0.58157	-0.92181	-1.15348								221.1	2.32758	0.561127	0.475091	-1.04111	-1.37326
223.2	-1.0331	5.5525	-5.8472	-4.1624	1.984		223.2	1.35868	2.33765	0.73274	0.41795	1.14043								223.2	1.45559	2.14992	0.626261	0.298649	0.920649
225.3	-2.2252	3.4561	-5.4474	-4.8561	0.558		225.3	0.16878	0.24365	1.13381	-0.27388	-0.28567								225.3	0.265695	0.0559166	1.02733	-0.393181	-0.505451
227.4	-2.543	5.1559	-5.8972	-3.7164	1.364		227.4	-0.14681	1.94585	0.68528	0.86768	0.52023								227.4	-0.0498955	1.75812	0.578801	0.748379	0.300449
229.5	-2.8609	2.6063	-6.6968	-4.4597	1.364		229.5	-0.4625	-0.60135	-0.11306	0.12625	0.52013								229.5	-0.365585	-0.789083	-0.219539	0.00694926	0.300349
231.6	0.3179	4.0227	-5.4974	-4.9057	0.31		231.6	2.71851	0.81745	1.08761	-0.31788	-0.53397								231.6	2.81542	0.629717	0.981131	-0.437181	-0.753751
233.7	-0.7152	3.0595	-6.0971	-2.8245	2.9759		233.7	1.68762	-0.14335	0.48918	1.76518	2.13183								233.7	1.78453	-0.331083	0.382701	1.64588	1.91205
235.8	-1.9868	3.1162	-6.8967	-3.32	0.62		235.8	0.41823	-0.08425	-0.30916	1.27155	-0.22417								235.8	0.515145	-0.271983	-0.415639	1.15225	-0.443951
237.9	-3.7351	2.7196	-8.5459	-5.9463	-0.062		237.9	-1.32786	-0.47845	-1.95709	-1.35289	-0.90627								237.9	-1.23095	-0.666183	-2.06357	-1.47219	-1.12605
240	-3.0993	3.9661	-5.9471	-4.1624	2.294		240	-0.68985	0.77045	0.64298	0.43288	1.44963								240	-0.592935	0.582717	0.536501	0.313579	1.22985
242.1	-2.702	1.9264	-7.4964	-3.5182	1.86		242.1	-0.29034	-1.26685	-0.90506	1.07894	1.01553								242.1	-0.193425	-1.45458	-1.01154	0.959639	0.795749
244.2	-3.8146	3.2862	-4.9976	-4.4597	0.062		244.2	-1.40073	0.09535	1.59501	0.13931	-0.78257								244.2	-1.30382	-0.0923834	1.48853	0.0200093	-1.00235
246.3	-2.0662	3.2295	-4.8477	-4.8561	3.7819		246.3	0.34988	0.04105	1.74618	-0.25522	2.93723								246.3	0.446795	-0.146683	1.6397	-0.374521	2.71745
248.4	-4.2914	3.0595	-4.9976	-3.7164	0.434		248.4	-1.87311	-0.12655	1.59755	0.88634	-0.41077								248.4	-1.7762	-0.314283	1.49107	0.767039	-0.630551
250.5	-5.5629	3.6828	-7.1965	-3.9146	0.124		250.5	-3.14241	0.49915	-0.60009	0.69001	-0.72087								250.5	-3.0455	0.311417	-0.706569	0.570709	-0.940651
252.6	-5.1656	3.6261	-6.5469	-3.0227	1.178		252.6	-2.7429	0.44484	0.05078	1.58377	0.33304								252.6	-2.64599	0.257107	-0.0556987	1.46447	0.113259
254.7	-2.2252	2.9462	-5.9471	-2.9236	1.426		254.7	0.19971	-0.23266	0.65185	1.68474	0.58094								254.7	0.296625	-0.420393	0.545371	1.56544	0.361159
256.8	-1.1126	2.0963	-7.4464	-4.9552	0.62		256.8	1.31452	-1.08016	-0.84619	-0.345	-0.22516								256.8	1.41143	-1.26789	-0.952669	-0.464301	-0.444941
258.9	-1.1126	2.8896	-4.6977	-5.1534	-0.124		258.9	1.31673	-0.28446	1.90378	-0.54133	-0.96926								258.9	1.41364	-0.472193	1.7973	-0.660631	-1.18904
261	-4.2119	3.1162	-6.6968	-4.6579	1.55		261	-1.78036	-0.05546	-0.09405	-0.04397	0.70464								261	-1.68345	-0.243193	-0.200529	-0.163271	0.484859
263.1	-2.1457	4.7026	-8.246	-3.5182	-0.558		263.1	0.28805	1.53334	-1.64198	1.0976	-1.40346								263.1	0.384965	1.34561	-1.74846	0.978299	-1.62324
265.2	-3.4172	4.1927	-7.3465	-4.5092	-0.806		265.2	-0.98124	1.02584	-0.74122	0.10847	-1.65156								265.2	-0.884325	0.838107	-0.847699	-0.0108307	-1.87134
267.3	-0.3974	3.5695	-5.4474	-3.3695	3.4719		267.3	2.04077	0.40504	1.15915	1.25003	2.62624								267.3	2.13768	0.217307	1.05267	1.13073	2.40646
269.4	-0.7152	2.0963	-7.8962	-4.0137	1.55		269.4	1.72518	-1.06576	-1.28838	0.6077	0.70424								269.4	1.82209	-1.25349	-1.39486	0.488399	0.484459
271.5	-1.1921	4.8726	-6.5968	-3.9146	0.31		271.5	1.25049	1.71294	0.01228	0.70866	-0.53586								271.5	1.3474	1.52521	-0.0941987	0.589359	-0.755641
273.6	-3.7351	2.3796	-6.8467	-4.6579	-1.674		273.6	-1.29031	-0.77766	-0.23635	-0.03277	-2.51996								273.6	-1.1934	-0.965393	-0.342829	-0.152071	-2.73974
275.7	0.6358	1.5864	-7.4964	-6.3427	-1.178		275.7	3.0828	-1.56846	-0.88478	-1.71571	-2.02406								275.7	3.17971	-1.75619	-0.991259	-1.83501	-2.24384
277.8	-6.4371	5.2692	-7.8962	-3.9642	0.682		277.8	-3.98789	2.11674	-1.28332	0.66466	-0.16416								277.8	-3.89098	1.92901	-1.3898	0.545359	-0.383941
279.9	-4.4503	1.6997	-4.3479	-5.4012	1.116		279.9	-1.99888	-1.45037	2.26625	-0.77047	0.26974								279.9	-1.90197	-1.6381	2.15977	-0.889771	0.0499589
282	1.351	3.0029	-7.2965	-5.4012	2.7899		282	3.80463	-0.14477	-0.68108	-0.76861	1.94355								282	3.90154	-0.332503	-0.787559	-0.887911	1.72377
284.1	-1.8278	3.4561	-4.8477	-4.8561	0.186		284.1	0.62804	0.31083	1.76899	-0.22164	-0.66045								284.1	0.724955	0.123097	1.66251	-0.340941	-0.880231
286.2	-4.2914	3.0595	-6.3969	-3.9146	2.7279		286.2	-1.83335	-0.08337	0.22105	0.72172	1.88135								286.2	-1.73644	-0.271103	0.114571	0.602419	1.66157
288.3	-3.9735	0.9065	-8.296	-4.6083	-0.372		288.3	-1.51324	-2.23397	-1.67678	0.02989	-1.21865								288.3	-1.41633	-2.4217	-1.78326	-0.0894107	-1.43843
290.4	-1.9868	2.0397	-6.8967	-3.32	2.232		290.4	0.47567	-1.09837	-0.27621	1.32005	1.38525								290.4	0.572585	-1.2861	-0.382689	1.20075	1.16547
292.5	-0.5563	3.2862	-8.4459	-3.6173	-0.496		292.5	1.90838	0.15053	-1.82415	1.02462	-1.34285								292.5	2.00529	-0.0372034	-1.93063	0.905319	-1.56263
294.6	-1.9073	3.5695	-5.6973	-4.7075	4.5259		294.6	0.55959	0.43623	0.92572	-0.06371	3.67895								294.6	0.656505	0.248497	0.819241	-0.183011	3.45917
296.7	-2.9404	6.5723	-6.197	-4.4597	1.55		296.7	-0.4713	3.44143	0.42729	0.18595	0.70295								296.7	-0.374385	3.2537	0.320811	0.0666493	0.483169
298.8	-2.0662	4.476	-8.7458	-4.311	0.496		298.8	0.4051	1.34753	-2.12024	0.33652	-0.35115								298.8	0.502015	1.1598	-2.22672	0.217219	-0.570931
300.9	0.7947	4.8159	-6.4469	-2.7749	1.86		300.9	3.26821	1.68983	0.17992	1.87448	1.01275								300.9	3.36512	1.5021	0.0734413	1.75518	0.792969
303	-5.5629	5.4958	-7.7963	-4.5588	1.55		303	-3.08718	2.37213	-1.16821	0.09245	0.70265								303	-2.99027	2.1844	-1.27469	-0.0268507	0.482869
305.1	-2.4636	2.6629	-9.6454	-4.4101	3.0999		305.1	0.01433	-0.45837	-3.01604	0.24301	2.25245								305.1	0.111245	-0.646103	-3.12252	0.123709	2.03267
307.2	-2.9404	3.3428	-5.7472	-5.3516	2.5419		307.2	-0.46026	0.22393	0.88342	-0.69662	1.69435								307.2	-0.363345	0.0361966	0.776941	-0.815921	1.47457
309.3	-1.9868	2.2097	-7.5464	-5.748	1.55		309.3	0.49555	-0.90678	-0.91451	-1.09115	0.70235								309.3	0.592465	-1.09451	-1.02099	-1.21045	0.482569
311.4	-3.2583	4.9859	-6.5469	-3.8155	0.31		311.4	-0.77374	1.87182	0.08626	0.84321	-0.53774								311.4	-0.676825	1.68409	-0.0202187	0.723909	-0.757521
313.5	-3.1788	3.3428	-5.7472	-5.4012	3.2859		313.5	-0.69203	0.23112	0.88722	-0.74062	2.43806								313.5	-0.595115	0.0433866	0.780741	-0.859921	2.21828
315.6	-1.4305	5.9491	-7.4464	-4.9057	-0.682		315.6	1.05848	2.83982	-0.81071	-0.24326	-1.52994								315.6	1.15539	2.65209	-0.917189	-0.362561	-1.74972
317.7	-3.1788	4.306	-6.347	-4.4597	0.558		317.7	-0.68761	1.19912	0.28996	0.20461	-0.29004								317.7	-0.590695	1.01139	0.183481	0.0853093	-0.509821
319.8	-3.8146	3.2862	-5.7972	-4.4101	0		319.8	-1.3212	0.18172	0.84103	0.25607	-0.84814								319.8	-1.22429	-0.00601337	0.734551	0.136769	-1.06792
321.9	-0.7947	3.9094	-6.0971	-5.3516	1.488		321.9	1.70091	0.80732	0.54239	-0.68356	0.63976								321.9	1.79782	0.619587	0.435911	-0.802861	0.419979
324	-3.7351	3.0595	-5.7472	-3.8155	0.062		324	-1.23729	-0.04018	0.89356	0.85441	-0.78634								324	-1.14038	-0.227913	0.787081	0.735109	-1.00612
326.1	-5.1656	4.306	-6.4469	-4.2119	1.488		326.1	-2.66558	1.20872	0.19513	0.45987	0.63956								326.1	-2.56867	1.02099	0.0886513	0.340569	0.419779
328.2	-5.404	3.5695	-8.5459	-4.311	2.294		328.2	-2.90177	0.47462	-1.90261	0.36264	1.44546								328.2	-2.80486	0.286887	-2.00909	0.243339	1.22568
330.3	-1.9868	4.5893	-7.8962	-4.4597	0.682		330.3	0.51764	1.49682	-1.25164	0.2158	-0.16664								330.3	0.614555	1.30909	-1.35812	0.0964993	-0.386421
332.4	-2.9404	1.9264	-8.1461	-5.203	2.356		332.4	-0.43375	-1.16368	-1.50027	-0.52563	1.50726								332.4	-0.336835	-1.35141	-1.60675	-0.644931	1.28748
334.5	-0.0795	4.9292	-6.297	-5.1534	0.93		334.5	2.42936	1.84152	0.35009	-0.47417	0.08116								334.5	2.52627	1.65379	0.243611	-0.593471	-0.138621
336.6	-3.0993	3.2862	-6.3969	-4.6579	0.62		336.6	-0.58823	0.20092	0.25146	0.0232	-0.22894								336.6	-0.491315	0.0131866	0.144981	-0.0961007	-0.448721
338.7	-0.1589	2.323	-7.9962	-5.9463	1.364		338.7	2.35438	-0.75989	-1.34657	-1.26333	0.51497								338.7	2.45129	-0.947623	-1.45305	-1.38263	0.295189
340.8	-3.894	4.0794	-6.9966	-5.1534	2.7279		340.8	-1.37851	0.99891	-0.3457	-0.46857	1.87877								340.8	-1.2816	0.811177	-0.452179	-0.587871	1.65899
342.9	-3.6556	4.476	-5.9471	-4.5588	1.612		342.9	-1.1379	1.39791	0.70506	0.1279	0.76277								342.9	-1.04099	1.21018	0.598581	0.00859926	0.542989
345	-0.7947	2.8329	-8.396	-3.766	2.108		345	1.72521	-0.24279	-1.74257	0.92256	1.25867								345	1.82212	-0.430523	-1.84905	0.803259	1.03889
347.1	-0.2384	2.4363	-5.7472	-3.766	1.798		347.1	2.28372	-0.63699	0.9075	0.92443	0.94857								347.1	2.38063	-0.824723	0.801021	0.805129	0.728789
349.2	-2.702	2.7196	-6.297	-4.757	2.356		349.2	-0.17768	-0.35129	0.35896	-0.06471	1.50647								349.2	-0.0807655	-0.539023	0.252481	-0.184011	1.28669
351.3	-2.8609	3.3428	-8.296	-3.7164	0.992		351.3	-0.33437	0.27431	-1.63877	0.97776	0.14237								351.3	-0.237455	0.0865766	-1.74525	0.858459	-0.0774111
353.4	-3.2583	0.8499	-6.3969	-3.3695	0.558		353.4	-0.72956	-2.21619	0.2616	1.32652	-0.29173								353.4	-0.632645	-2.40392	0.155121	1.20722	-0.511511
355.5	-3.6556	3.3428	-5.4974	-5.5003	1.24		355.5	-1.12465	0.27911	1.16237	-0.80241	0.39017								355.5	-1.02774	0.0913766	1.05589	-0.921711	0.170389
357.6	-2.3841	2.2663	-8.9957	-4.6579	1.116		357.6	0.14906	-0.79499	-2.33467	0.04186	0.26607								357.6	0.245975	-0.982723	-2.44115	-0.0774407	0.0462889
359.7	-4.2914	2.4363	-5.7972	-2.6758	3.5339		359.7	-1.75603	-0.62259	0.8651	2.02582	2.68387								359.7	-1.65912	-0.810323	0.758621	1.90652	2.46409
361.8	-2.9404	4.3627	-5.0476	-5.8967	2.294		361.8	-0.40282	1.30621	1.61597	-1.19321	1.44387								361.8	-0.305905	1.11848	1.50949	-1.31251	1.22409
363.9	-6.596	1.8697	-6.7468	-5.0543	1.86		363.9	-4.05621	-1.18439	-0.08197	-0.34895	1.00977								363.9	-3.9593	-1.37212	-0.188449	-0.468251	0.789989
366	-2.9404	3.0595	-6.6968	-4.4597	3.4099		366	-0.3984	0.00781	-0.0307	0.24752	2.55957								366	-0.301485	-0.179923	-0.137179	0.128219	2.33979
368.1	-4.3709	3.6828	-6.6468	-6.7391	1.178		368.1	-1.82669	0.6335	0.02057	-2.03002	0.32758								368.1	-1.72978	0.445767	-0.0859087	-2.14932	0.107799
370.2	-3.0199	4.0227	-7.4964	-4.5092	0.682		370.2	-0.47348	0.9758	-0.82777	0.20175	-0.16852								370.2	-0.376565	0.788067	-0.934249	0.0824493	-0.388301
372.3	-5.0066	2.8896	-7.3465	-5.7976	4.1539		372.3	-2.45797	-0.1549	-0.6766	-1.08478	3.30328								372.3	-2.36106	-0.342633	-0.783079	-1.20408	3.0835
374.4	1.9868	2.493	-5.4474	-4.0633	0.806		374.4	4.53763	-0.5491	1.22377	0.65138	-0.04472								374.4	4.63454	-0.736833	1.11729	0.532079	-0.264501
376.5	-2.6225	4.3627	-7.6963	-3.5182	-0.806		376.5	-0.06946	1.323	-1.02386	1.19835	-1.65682								376.5	0.0274545	1.13527	-1.13034	1.07905	-1.8766
378.6	-0.5563	3.6261	-7.7463	-6.1445	-1.426		378.6	1.99895	0.5888	-1.0726	-1.42609	-2.27692								378.6	2.09586	0.401067	-1.17908	-1.54539	-2.4967
380.7	0.1589	1.3598	-4.8477	-5.748	1.302		380.7	2.71636	-1.6751	1.82727	-1.02772	0.45098								380.7	2.81327	-1.86283	1.72079	-1.14702	0.231199
382.8	-1.1126	0.7366	-6.9966	-3.0227	2.9139		382.8	1.44707	-2.2959	-0.32036	1.69944	2.06278								382.8	1.54398	-2.48363	-0.426839	1.58014	1.843
384.9	-2.1457	3.4561	-7.1965	-6.3427	0.248		384.9	0.41618	0.426	-0.519	-1.61869	-0.60322								384.9	0.513095	0.238267	-0.625479	-1.73799	-0.823001
387	-2.543	4.0227	-6.0971	-3.9146	-0.31		387	0.02109	0.995	0.58167	0.81128	-1.16132								387	0.118005	0.807267	0.475191	0.691979	-1.3811
389.1	-4.1324	3.4561	-5.6973	-4.1624	-0.558		389.1	-1.5661	0.4308	0.98274	0.56534	-1.40942								389.1	-1.46919	0.243067	0.876261	0.446039	-1.6292
391.2	-0.3974	3.1162	-7.0466	-4.8066	-0.558		391.2	2.17111	0.0933	-0.36529	-0.07699	-1.40952								391.2	2.26802	-0.0944334	-0.471769	-0.196291	-1.6293
393.3	-2.8609	3.2295	-5.5973	-5.203	0.682		393.3	-0.29018	0.209	1.08527	-0.47153	-0.16962								393.3	-0.193265	0.0212666	0.978791	-0.590831	-0.389401
395.4	-1.4305	3.6828	-8.8458	-3.6173	2.6039		395.4	1.14243	0.66469	-2.16196	1.11604	1.75218								395.4	1.23934	0.476957	-2.26844	0.996739	1.5324
397.5	-4.7682	1.7564	-7.4964	-4.5092	2.9139		397.5	-2.19306	-1.25931	-0.81129	0.226	2.06209								397.5	-2.09615	-1.44704	-0.917769	0.106699	1.84231
399.6	-0.3974	2.2663	-6.6468	-1.883	-0.992		399.6	2.17994	-0.74701	0.03957	2.85407	-1.84391								399.6	2.27685	-0.934743	-0.0669087	2.73477	-2.06369
401.7	-3.0993	2.4363	-6.297	-5.5994	1.054		401.7	-0.51975	-0.57461	0.39064	-0.86046	0.20199								401.7	-0.422835	-0.762343	0.284161	-0.979761	-0.0177911
403.8	-3.3377	3.7394	-8.1461	-2.0812	0.806		403.8	-0.75594	0.73089	-1.45719	2.6596	-0.04611								403.8	-0.659025	0.543157	-1.56367	2.5403	-0.265891
405.9	-3.1788	4.5893	-4.2979	-4.3606	0.248		405.9	-0.59483	1.58319	2.39227	0.38207	-0.60421								405.9	-0.497915	1.39546	2.28579	0.262769	-0.823991
408	-2.1457	1.7564	-7.0966	-4.4101	0.434		408	0.44048	-1.24731	-0.40516	0.33443	-0.41831								408	0.537395	-1.43504	-0.511639	0.215129	-0.638091
410.1	-0.7947	0.9632	-6.6968	-6.3922	-1.24		410.1	1.79369	-2.03811	-0.00409	-1.6458	-2.09241								410.1	1.8906	-2.22584	-0.110569	-1.7651	-2.31219
412.2	-2.4636	2.8896	-5.5973	-4.757	1.488		412.2	0.127	-0.10931	1.09668	-0.00874	0.63549								412.2	0.223915	-0.297043	0.990201	-0.128041	0.415709
414.3	-1.8278	4.0227	-6.7967	-3.4686	1.612		414.3	0.76501	1.02619	-0.10146	1.28153	0.75939								414.3	0.861925	0.838457	-0.207939	1.16223	0.539609
416.4	-3.7351	4.2494	-8.1961	-3.9642	2.6659		416.4	-1.14008	1.25529	-1.49959	0.7878	1.81319								416.4	-1.04317	1.06756	-1.60607	0.668499	1.59341
418.5	-2.7815	2.493	-6.4969	-4.4101	1.116		418.5	-0.18427	-0.49871	0.20088	0.34376	0.26319								418.5	-0.0873555	-0.686443	0.0944013	0.224459	0.0434089
420.6	-3.1788	3.2862	-5.3974	-4.9057	-0.248		420.6	-0.57936	0.29689	1.30164	-0.14997	-1.10091								420.6	-0.482445	0.109157	1.19516	-0.269271	-1.32069
422.7	-1.9868	3.3995	-7.0966	-6.64	-0.186		422.7	0.61485	0.41259	-0.39629	-1.88241	-1.03901								422.7	0.711765	0.224857	-0.502769	-2.00171	-1.25879
424.8	-0.7947	3.1162	-7.0966	-3.6173	1.24		424.8	1.80915	0.13168	-0.39502	1.14216	0.38689								424.8	1.90606	-0.0560534	-0.501499	1.02286	0.167109
426.9	-6.1192	4.306	-6.3969	-5.9958	1.054		426.9	-3.51314	1.32388	0.30595	-1.23448	0.2008								426.9	-3.41623	1.13615	0.199471	-1.35378	-0.0189811
429	-2.1457	3.5695	-6.247	-5.1534	1.426		429	0.46257	0.58978	0.45711	-0.39021	0.5727								429	0.559485	0.402047	0.350631	-0.509511	0.352919
431.1	-1.5099	4.3627	-5.3974	-7.1355	1.178		431.1	1.10058	1.38538	1.30798	-2.37044	0.3246								431.1	1.19749	1.19765	1.2015	-2.48974	0.104819
433.2	-5.0066	1.5298	-5.1475	-5.6985	-1.612		433.2	-2.39391	-1.44512	1.55915	-0.93158	-2.4655								433.2	-2.297	-1.63285	1.45267	-1.05088	-2.68528
435.3	-6.9934	4.9859	-7.4464	-3.7164	-0.868		435.3	-4.3785	2.01338	-0.73849	1.05239	-1.7216								435.3	-4.28159	1.82565	-0.844969	0.933089	-1.94138
437.4	-3.9735	2.4363	-7.0966	-4.6083	1.674		437.4	-1.35639	-0.53382	-0.38742	0.16235	0.8203								437.4	-1.25948	-0.721553	-0.493899	0.0430493	0.600519
439.5	-1.4305	2.0963	-8.296	-4.0633	1.736		439.5	1.18882	-0.87142	-1.58555	0.70922	0.8822								439.5	1.28573	-1.05915	-1.69203	0.589919	0.662419
441.6	-2.702	2.7762	-5.9971	-3.9642	0.062		441.6	-0.08047	-0.18912	0.71461	0.81018	-0.7919								441.6	0.0164445	-0.376853	0.608131	0.690879	-1.01168
443.7	-0.1589	4.7593	-6.5469	-5.5994	1.054		443.7	2.46484	1.79638	0.16608	-0.82315	0.2								443.7	2.56175	1.60865	0.0596013	-0.942451	-0.0197811
445.8	-1.1921	2.2663	-7.0466	-6.8382	1.798		445.8	1.43385	-0.69422	-0.33235	-2.06008	0.9439								445.8	1.53076	-0.881953	-0.438829	-2.17938	0.724119
447.9	-4.053	5.2692	-6.9467	-4.1128	-0.992		447.9	-1.42484	2.31108	-0.23118	0.66718	-1.8462								447.9	-1.32793	2.12335	-0.337659	0.547879	-2.06598
450	-4.3709	2.5496	-7.6463	-4.311	0		450	-1.74054	-0.40612	-0.92952	0.47085	-0.8543								450	-1.64363	-0.593853	-1.036	0.351549	-1.07408
452.1	-2.543	2.2097	-7.8462	-5.3516	3.0379		452.1	0.08957	-0.74362	-1.12815	-0.56789	2.1835								452.1	0.186485	-0.931353	-1.23463	-0.687191	1.96372
454.2	-2.3841	1.5864	-6.247	-4.6579	1.302		454.2	0.25068	-1.36453	0.47232	0.12768	0.4475								454.2	0.347595	-1.55226	0.365841	0.00837926	0.227719
456.3	-2.3841	6.4024	-6.347	-5.6985	1.922		456.3	0.25289	3.45387	0.37358	-0.91106	1.06741								456.3	0.349805	3.26614	0.267101	-1.03036	0.847629
458.4	-2.543	3.9661	-5.9471	-4.757	2.108		458.4	0.0962	1.01997	0.77475	0.03231	1.25331								458.4	0.193115	0.832237	0.668271	-0.0869907	1.03353
460.5	-3.4967	3.3428	-6.247	-4.5588	1.798		460.5	-0.85529	0.39907	0.47612	0.23237	0.94321								460.5	-0.758375	0.211337	0.369641	0.113069	0.723429
462.6	-3.7351	3.7394	-7.5464	-4.0633	-1.054		462.6	-1.09148	0.79807	-0.82201	0.72974	-1.90889								462.6	-0.994565	0.610337	-0.928489	0.610439	-2.12867
464.7	-0.7152	2.493	-6.247	-4.757	1.24		464.7	1.93063	-0.44593	0.47865	0.03791	0.38501								464.7	2.02754	-0.633663	0.372171	-0.0813907	0.165229
466.8	-0.8742	0.9065	-7.5964	-5.4012	-0.558		466.8	1.77384	-2.03003	-0.86948	-0.60443	-1.41309								466.8	1.87075	-2.21776	-0.975959	-0.723731	-1.63287
468.9	-3.9735	4.1927	-7.3465	-4.1128	1.426		468.9	-1.32325	1.25857	-0.61831	0.68584	0.57081								468.9	-1.22634	1.07084	-0.724789	0.566539	0.351029
471	-6.9934	4.136	-6.7967	-6.0454	0.558		471	-4.34094	1.20427	-0.06725	-1.2449	-0.29729								471	-4.24403	1.01654	-0.173729	-1.3642	-0.517071
473.1	-0.2384	2.153	-7.0466	-6.9373	-0.496		473.1	2.41627	-0.77633	-0.31588	-2.13493	-1.35139								473.1	2.51318	-0.964063	-0.422359	-2.25423	-1.57117
475.2	-3.894	3.6828	-5.6973	-6.2436	0.744		475.2	-1.23713	0.75587	1.03469	-1.43937	-0.11149								475.2	-1.14022	0.568137	0.928211	-1.55867	-0.331271
477.3	-2.543	4.136	-6.1471	-5.4507	1.86		477.3	0.11608	1.21147	0.58615	-0.6446	1.00441								477.3	0.212995	1.02374	0.479671	-0.763901	0.784629
479.4	-1.9868	2.8896	-6.6968	-4.757	1.488		479.4	0.67449	-0.03253	0.03772	0.05097	0.63231								479.4	0.771405	-0.220263	-0.0687587	-0.0683307	0.412529
481.5	-1.5099	3.9661	-6.4469	-4.8561	2.046		481.5	1.1536	1.04637	0.28889	-0.04627	1.19021								481.5	1.25051	0.858637	0.182411	-0.165571	0.970429
483.6	-3.4967	3.0029	-6.3969	-5.2525	1.736		483.6	-0.83099	0.08556	0.34016	-0.4408	0.88011								483.6	-0.734075	-0.102173	0.233681	-0.560101	0.660329
485.7	-4.1324	3.7961	-6.197	-4.7075	2.046		485.7	-1.46448	0.88116	0.54132	0.10606	1.19002								485.7	-1.36757	0.693427	0.434841	-0.0132407	0.970239
487.8	-3.6556	2.2097	-7.0966	-5.4507	-0.31		487.8	-0.98547	-0.70284	-0.35701	-0.63527	-1.16608								487.8	-0.888555	-0.890573	-0.463489	-0.754571	-1.38586
489.9	0	2.8896	-7.1466	-3.6669	-0.31		489.9	2.67234	-0.02054	-0.40574	1.15039	-1.16618								489.9	2.76925	-0.208273	-0.512219	1.03109	-1.38596
492	-3.9735	3.5128	-5.7472	-4.4597	2.8519		492	-1.29895	0.60506	0.99492	0.35946	1.99562								492	-1.20204	0.417327	0.888441	0.240159	1.77584
494.1	-5.3245	4.646	-7.2465	-5.3516	0.868		494.1	-2.64774	1.74066	-0.50311	-0.53057	0.01162								494.1	-2.55083	1.55293	-0.609589	-0.649871	-0.208161
496.2	-2.2252	3.5128	-7.9462	-6.2931	1.054		496.2	0.45377	0.60986	-1.20154	-1.47021	0.19752								496.2	0.550685	0.422127	-1.30802	-1.58951	-0.0222611
498.3	-1.5099	3.2862	-5.9971	-4.3606	2.356		498.3	1.17128	0.38566	0.74883	0.46416	1.49942								498.3	1.26819	0.197927	0.642351	0.344859	1.27964
500.4	-2.9404	2.0963	-7.7463	-3.9642	3.0379		500.4	-0.25702	-0.80184	-0.99911	0.86242	2.18122								500.4	-0.160105	-0.989573	-1.10559	0.743119	1.96144
502.5	-3.4967	5.2692	-5.4474	-4.0137	0.62		502.5	-0.81111	2.37346	1.30106	0.81479	-0.23678								502.5	-0.714195	2.18573	1.19458	0.695489	-0.456561
504.6	-4.4503	2.6063	-5.9971	-5.0543	2.108		504.6	-1.7625	-0.28704	0.75263	-0.22395	1.25112								504.6	-1.66559	-0.474773	0.646151	-0.343251	1.03134
506.7	-3.4967	4.476	-6.5469	-4.2615	2.6659		506.7	-0.80669	1.58506	0.20409	0.57072	1.80892								506.7	-0.709775	1.39733	0.0976113	0.451419	1.58914
508.8	-4.2119	4.0794	-5.9971	-4.4101	1.302		508.8	-1.51968	1.19086	0.75516	0.42399	0.44492								508.8	-1.42277	1.00313	0.648681	0.304689	0.225139
510.9	-1.9073	4.0227	-6.9467	-4.757	-0.124		510.9	0.78713	1.13656	-0.19317	0.07895	-0.98118								510.9	0.884045	0.948827	-0.299649	-0.0403507	-1.20096
513	-1.9073	3.7394	-7.4964	-3.9642	1.612		513	0.78934	0.85565	-0.74161	0.87362	0.75472								513	0.886255	0.667917	-0.848089	0.754319	0.534939
515.1	-5.8013	2.153	-7.4464	-3.9146	0.372		515.1	-3.10245	-0.72835	-0.69034	0.92508	-0.48537								515.1	-3.00554	-0.916083	-0.796819	0.805779	-0.705151
517.2	-2.702	2.3796	-8.346	-4.5588	-0.186		517.2	-0.000942133	-0.49935	-1.58867	0.28275	-1.04347								517.2	0.0959724	-0.687083	-1.69515	0.163449	-1.26325
519.3	-4.053	2.2663	-5.9471	-4.7075	1.55		519.3	-1.34973	-0.61025	0.8115	0.13591	0.69243								519.3	-1.25282	-0.797983	0.705021	0.0166093	0.472649
521.4	-3.0199	1.0198	-7.0466	-5.2525	1.922		521.4	-0.31442	-1.85435	-0.28674	-0.40722	1.06433								521.4	-0.217505	-2.04208	-0.393219	-0.526521	0.844549
523.5	-2.9404	0.4533	-6.347	-3.9146	1.488		523.5	-0.23271	-2.41845	0.41413	0.93255	0.63023								523.5	-0.135795	-2.60618	0.307651	0.813249	0.410449
525.6	-0.1589	2.4363	-8.1461	-5.5994	-0.744		525.6	2.55099	-0.43305	-1.3837	-0.75039	-1.60187								525.6	2.6479	-0.620783	-1.49018	-0.869691	-1.82165
527.7	-1.1921	2.5496	-8.7458	-4.3606	0.62		527.7	1.52	-0.31735	-1.98214	0.49028	-0.23797								527.7	1.61691	-0.505083	-2.08862	0.370979	-0.457751
529.8	-5.245	3.9094	-7.0466	-3.6669	-0.744		529.8	-2.53069	1.04485	-0.28167	1.18584	-1.60207								529.8	-2.43378	0.857117	-0.388149	1.06654	-1.82185
531.9	-2.2252	3.8527	-7.4464	-4.1624	2.6039		531.9	0.49132	0.99055	-0.6802	0.69221	1.74573								531.9	0.588235	0.802817	-0.786679	0.572909	1.52595
534	-4.7682	3.6828	-7.4964	-4.311	1.364		534	-2.04947	0.82305	-0.72893	0.54547	0.50573								534	-1.95256	0.635317	-0.835409	0.426169	0.285949
536.1	-3.7351	3.3428	-6.6968	-6.194	-1.054		536.1	-1.01416	0.48545	0.07193	-1.33566	-1.91237								536.1	-0.917245	0.297717	-0.0345487	-1.45496	-2.13215
538.2	-2.1457	5.3259	-9.0956	-3.6669	3.0999		538.2	0.57745	2.47095	-2.3256	1.19331	2.24143								538.2	0.674365	2.28322	-2.43208	1.07401	2.02165
540.3	-1.351	2.7762	-7.6463	-3.4686	2.356		540.3	1.37436	-0.07636	-0.87503	1.39347	1.49743								540.3	1.47127	-0.264093	-0.981509	1.27417	1.27765
542.4	-5.0066	2.8896	-7.4964	-5.5003	0.558		542.4	-2.27903	0.03944	-0.72387	-0.63636	-0.30066								542.4	-2.18212	-0.148293	-0.830349	-0.755661	-0.520441
544.5	-2.4636	4.4193	-6.9966	-3.2704	-1.736		544.5	0.26618	1.57154	-0.2228	1.5954	-2.59476								544.5	0.363095	1.38381	-0.329279	1.4761	-2.81454
546.6	-3.2583	3.2862	-6.0471	-3.9146	0.682		546.6	-0.52631	0.44084	0.72797	0.95307	-0.17686								546.6	-0.429395	0.253107	0.621491	0.833769	-0.396641
548.7	-0.8742	3.6828	-8.4959	-4.5092	1.178		548.7	1.86	0.83984	-1.71957	0.36033	0.31904								548.7	1.95691	0.652107	-1.82605	0.241029	0.0992589
550.8	-4.5298	4.4193	-7.7963	-4.4101	1.922		550.8	-1.7934	1.57874	-1.0187	0.4613	1.06294								550.8	-1.69649	1.39101	-1.12518	0.341999	0.843159
552.9	-2.3841	3.6261	-6.347	-5.5003	-1.736		552.9	0.35451	0.78794	0.43187	-0.62704	-2.59516								552.9	0.451425	0.600207	0.325391	-0.746341	-2.81494
555	-1.6689	5.7225	-4.7977	-4.6083	0.062		555	1.07192	2.88674	1.98244	0.26683	-0.79726								555	1.16883	2.69901	1.87596	0.147529	-1.01704
557.1	-0.3179	2.9462	-7.9962	-6.8382	2.7899		557.1	2.42513	0.11284	-1.2148	-1.9612	1.93054								557.1	2.52204	-0.0748934	-1.32128	-2.0805	1.71076
559.2	-3.2583	2.6063	-8.5959	-6.3922	1.364		559.2	-0.51306	-0.22466	-1.81323	-1.51334	0.50454								559.2	-0.416145	-0.412393	-1.91971	-1.63264	0.284759
561.3	-2.702	5.0426	-6.0971	-5.9463	-1.426		561.3	0.04545	2.21404	0.68684	-1.06557	-2.28556								561.3	0.142365	2.02631	0.580361	-1.18487	-2.50534
563.4	-3.1788	0.1133	-6.9966	-6.1445	0.062		563.4	-0.42914	-2.71286	-0.2114	-1.26191	-0.79766								563.4	-0.332225	-2.90059	-0.317879	-1.38121	-1.01744
565.5	-1.5894	1.8697	-6.7967	-4.4101	1.612		565.5	1.16247	-0.95406	-0.01023	0.47436	0.75224								565.5	1.25938	-1.14179	-0.116709	0.355059	0.532459
567.6	-0.2384	4.7593	-7.1466	-4.0633	0.744		567.6	2.51568	1.93794	-0.35886	0.82302	-0.11586								567.6	2.61259	1.75021	-0.465339	0.703719	-0.335641
569.7	-1.6689	4.8159	-8.296	-5.9463	0.372		569.7	1.08739	1.99693	-1.50699	-1.05811	-0.48796								569.7	1.1843	1.8092	-1.61347	-1.17741	-0.707741
571.8	-4.3709	3.5128	-7.0466	-6.1445	0.186		571.8	-1.6124	0.69623	-0.25633	-1.25444	-0.67405								571.8	-1.51549	0.508497	-0.362809	-1.37374	-0.893831
573.9	-0.7947	2.6629	-6.6468	-4.1624	0.992		573.9	1.96601	-0.15127	0.14474	0.72952	0.13185								573.9	2.06292	-0.339003	0.0382613	0.610219	-0.0879311
576	-3.0993	1.0765	-4.7977	-5.748	2.046		576	-0.33639	-1.73527	1.99511	-0.85421	1.18575								576	-0.239475	-1.923	1.88863	-0.973511	0.965969
578.1	-1.8278	3.1728	-5.3474	-5.8471	1.488		578.1	0.93732	0.36343	1.44667	-0.95145	0.62765								578.1	1.03423	0.175697	1.34019	-1.07075	0.407869
580.2	-0.7947	0.7932	-6.197	-5.748	1.364		580.2	1.97263	-2.01377	0.59834	-0.85048	0.50355								580.2	2.06954	-2.2015	0.491861	-0.969781	0.283769
582.3	-3.894	4.5326	-7.6963	-5.748	0.558		582.3	-1.12446	1.72803	-0.89969	-0.84862	-0.30255								582.3	-1.02755	1.5403	-1.00617	-0.967921	-0.522331
584.4	-4.1324	3.2862	-5.5973	-7.9779	0.744		584.4	-1.36065	0.48403	1.20057	-3.07665	-0.11665								584.4	-1.26374	0.296297	1.09409	-3.19595	-0.336431
586.5	-3.894	3.2862	-8.6459	-5.8967	1.364		586.5	-1.12004	0.48643	-1.84676	-0.99358	0.50325								586.5	-1.02313	0.298697	-1.95324	-1.11288	0.283469
588.6	-3.0199	2.6629	-7.2965	-4.7075	0.868		588.6	-0.24373	-0.13447	-0.49609	0.19748	0.00715								588.6	-0.146815	-0.322203	-0.602569	0.0781793	-0.212631
590.7	-2.702	2.153	-7.2965	-5.5003	0.682		590.7	0.07638	-0.64197	-0.49482	-0.59345	-0.17895								590.7	0.173295	-0.829703	-0.601299	-0.712751	-0.398731
592.8	-5.245	3.7394	-6.1471	-4.8561	3.5959		592.8	-2.46441	0.94683	0.65584	0.05261	2.73485								592.8	-2.3675	0.759097	0.549361	-0.0666907	2.51507
594.9	-0.3974	2.323	-6.0471	-5.0543	1.054		594.9	2.3854	-0.46717	0.75711	-0.14372	0.19285								594.9	2.48231	-0.654903	0.650631	-0.263021	-0.0269311
597	-5.404	4.1927	-8.0461	-3.9146	1.736		597	-2.61899	1.40493	-1.24062	0.99784	0.87475								597	-2.52208	1.2172	-1.3471	0.878539	0.654969
599.1	-3.2583	4.3627	-7.1466	-4.6083	0.558		599.1	-0.47108	1.57732	-0.33986	0.30601	-0.30335								599.1	-0.374165	1.38959	-0.446339	0.186709	-0.523131
601.2	0.5563	3.7961	-7.1466	-3.3695	0.806		601.2	3.34572	1.01312	-0.33859	1.54668	-0.05544								601.2	3.44263	0.825387	-0.445069	1.42738	-0.275221
603.3	-6.2781	1.8697	-6.9467	-3.5678	0.124		603.3	-3.48647	-0.91088	-0.13742	1.35024	-0.73754								603.3	-3.38956	-1.09861	-0.243899	1.23094	-0.957321
605.4	-1.5894	3.7961	-8.6958	-4.3606	2.5419		605.4	1.20444	1.01792	-1.88525	0.55931	1.68026								605.4	1.30135	0.830187	-1.99173	0.440009	1.46048
607.5	-3.5762	3.3995	-6.4469	-7.4328	1.24		607.5	-0.78015	0.62372	0.36491	-2.51103	0.37826								607.5	-0.683235	0.435987	0.258431	-2.63033	0.158479
609.6	-3.894	0.4533	-6.3969	-6.4913	-1.116		609.6	-1.09574	-2.32008	0.41618	-1.56766	-1.97784								609.6	-0.998825	-2.50781	0.309701	-1.68696	-2.19762
611.7	-4.5298	1.6431	-6.7967	-3.4191	-1.116		611.7	-1.72933	-1.12788	0.01765	1.5064	-1.97794								611.7	-1.63242	-1.31561	-0.0888287	1.3871	-2.19772
613.8	-3.0199	3.1728	-8.246	-5.5498	-0.062		613.8	-0.21722	0.40422	-1.43039	-0.62243	-0.92404								613.8	-0.120305	0.216487	-1.53687	-0.741731	-1.14382
615.9	-4.6887	1.3031	-6.6468	-2.6758	2.9759		615.9	-1.88381	-1.46308	0.17008	2.25344	2.11376								615.9	-1.7869	-1.65081	0.0636013	2.13414	1.89398
618	-5.0066	3.6828	-5.2975	-3.9146	2.6039		618	-2.1995	0.91902	1.52065	1.0165	1.74166								618	-2.10259	0.731287	1.41417	0.897199	1.52188
620.1	-3.3377	3.4561	-5.4974	-3.766	0.868		620.1	-0.52839	0.69472	1.32201	1.16697	0.00566								620.1	-0.431475	0.506987	1.21553	1.04767	-0.214121
622.2	-1.1126	1.8131	-5.6973	-5.6985	2.108		622.2	1.69892	-0.94588	1.12338	-0.76367	1.24556								622.2	1.79583	-1.13361	1.0169	-0.882971	1.02578
624.3	-7.6291	3.5128	-7.5964	-4.2119	0.124		624.3	-4.81537	0.75622	-0.77445	0.7248	-0.73854								624.3	-4.71846	0.568487	-0.880929	0.605499	-0.958321
626.4	-2.2252	3.3995	-8.1961	-3.7164	0.434		626.4	0.59073	0.64532	-1.37288	1.22216	-0.42864								626.4	0.687645	0.457587	-1.47936	1.10286	-0.648421
628.5	-3.6556	2.5496	-5.6473	-3.5678	0.868		628.5	-0.83746	-0.20219	1.17718	1.37263	0.00526								628.5	-0.740545	-0.389923	1.0707	1.25333	-0.214521
630.6	-3.2583	4.4193	-7.6463	-5.8967	2.7279		630.6	-0.43795	1.66991	-0.82055	-0.9544	1.86507								630.6	-0.341035	1.48218	-0.927029	-1.0737	1.64529
632.7	-0.6358	1.8697	-7.3465	-4.2119	1.364		632.7	2.18676	-0.87729	-0.51948	0.73226	0.50107								632.7	2.28367	-1.06502	-0.625959	0.612959	0.281289
634.8	-1.6689	5.0992	-5.9471	-4.9057	0.062		634.8	1.15587	2.35461	0.88118	0.04033	-0.80103								634.8	1.25278	2.16688	0.774701	-0.0789707	-1.02081
636.9	-3.4967	3.9661	-6.7468	-5.1039	1.364		636.9	-0.66972	1.22391	0.08275	-0.15601	0.50087								636.9	-0.572805	1.03618	-0.0237287	-0.275311	0.281089
639	-2.0662	4.4193	-6.5469	-3.0722	0.558		639	0.76299	1.67951	0.28392	1.87756	-0.30523								639	0.859905	1.49178	0.177441	1.75826	-0.525011
641.1	-1.9073	4.1927	-6.7967	-4.9552	1.364		641.1	0.9241	1.45531	0.03538	-0.00358	0.50067								641.1	1.02101	1.26758	-0.0710987	-0.122881	0.280889
643.2	-3.0199	2.7196	-7.5464	-3.9146	2.046		643.2	-0.18629	-0.01539	-0.71305	1.03889	1.18257								643.2	-0.0893755	-0.203123	-0.819529	0.919589	0.962789
645.3	-3.7351	3.0029	-5.9971	-5.6489	0.186		645.3	-0.89928	0.27031	0.83752	-0.69355	-0.67753								645.3	-0.802365	0.0825766	0.731041	-0.812851	-0.897311
647.4	-0.6358	2.9462	-7.4964	-6.0949	0.31		647.4	2.20223	0.21601	-0.66051	-1.13768	-0.55363								647.4	2.29914	0.0282766	-0.766989	-1.25698	-0.773411
649.5	-4.6887	3.0029	-6.9467	-5.5498	3.0379		649.5	-1.84846	0.27511	-0.10955	-0.59071	2.17417								649.5	-1.75155	0.0873766	-0.216029	-0.710011	1.95439
651.6	-5.3245	1.983	-8.296	-5.8471	1.116		651.6	-2.48206	-0.74239	-1.45758	-0.88615	0.25217								651.6	-2.38515	-0.930123	-1.56406	-1.00545	0.0323889
653.7	-5.404	2.6629	-6.247	-5.4507	3.0999		653.7	-2.55935	-0.06009	0.59269	-0.48788	2.23597								653.7	-2.46244	-0.247823	0.486211	-0.607181	2.01619
655.8	-3.1788	3.0595	-7.8462	-3.6173	1.798		655.8	-0.33194	0.33891	-1.00525	1.34738	0.93397								655.8	-0.235025	0.151177	-1.11173	1.22808	0.714189
657.9	0.8742	2.5496	-5.7972	-4.0137	1.922		657.9	3.72327	-0.1686	1.04502	0.95285	1.05787								657.9	3.82018	-0.356333	0.938541	0.833549	0.838089
660	-3.6556	3.2862	-7.9962	-4.7075	0.062		660	-0.80432	0.5704	-1.15271	0.26091	-0.80222								660	-0.707405	0.382667	-1.25919	0.141609	-1.022
662.1	-3.2583	1.3031	-7.7463	-2.3289	1.24		662.1	-0.40481	-1.4103	-0.90154	2.64138	0.37568								662.1	-0.307895	-1.59803	-1.00802	2.52208	0.155899
664.2	-3.894	2.0397	-6.4969	-3.8155	-0.062		664.2	-1.0383	-0.6713	0.34912	1.15665	-0.92642								664.2	-0.941385	-0.859033	0.242641	1.03735	-1.1462
666.3	-2.9404	2.2663	-5.4974	-3.8155	1.612		666.3	-0.08249	-0.4423	1.34989	1.15851	0.74748								666.3	0.0144245	-0.630033	1.24341	1.03921	0.527699
668.4	-1.9073	3.4561	-6.3969	-3.2704	4.2779		668.4	0.95282	0.7499	0.45166	1.70548	3.41328								668.4	1.04973	0.562167	0.345181	1.58618	3.1935
670.5	-2.4636	1.5864	-8.0961	-3.7164	1.364		670.5	0.39873	-1.1174	-1.24628	1.26134	0.49928								670.5	0.495645	-1.30513	-1.35276	1.14204	0.279499
672.6	-1.9073	2.6629	-8.346	-4.757	0.124		672.6	0.95724	-0.0385	-1.49491	0.22261	-0.74082								672.6	1.05415	-0.226233	-1.60139	0.103309	-0.960601
674.7	1.1126	3.7961	-7.2965	-3.32	2.5419		674.7	3.97935	1.0971	-0.44414	1.66147	1.67698								674.7	4.07626	0.909367	-0.550619	1.54217	1.4572
676.8	0.4768	3.6261	-7.3465	-3.8155	2.9139		676.8	3.34575	0.9295	-0.49288	1.16784	2.04888								676.8	3.44266	0.741767	-0.599359	1.04854	1.8291
678.9	-2.7815	3.1728	-7.8462	-5.5003	1.86		678.9	0.08966	0.4786	-0.99131	-0.51509	0.99488								678.9	0.186575	0.290867	-1.09779	-0.634391	0.775099
681	-3.4967	4.136	-7.7963	-3.2704	0.124		681	-0.62333	1.4442	-0.94014	1.71667	-0.74122								681	-0.526415	1.25647	-1.04662	1.59737	-0.961001
683.1	-3.0993	0.17	-5.4474	-5.3021	3.3479		683.1	-0.22372	-2.5194	1.41003	-0.31316	2.48258								683.1	-0.126805	-2.70713	1.30355	-0.432461	2.2628
685.2	-3.0993	4.306	-7.1466	-4.9057	0.124		685.2	-0.22151	1.61899	-0.28791	0.0851	-0.74142								685.2	-0.124595	1.43126	-0.394389	-0.0342007	-0.961201
687.3	-3.3377	1.983	-6.9966	-4.7075	1.116		687.3	-0.4577	-0.70161	-0.13664	0.28517	0.25048								687.3	-0.360785	-0.889343	-0.243119	0.165869	0.0306989
689.4	-2.3046	2.493	-6.5469	-4.8066	0.31		689.4	0.57761	-0.18921	0.31433	0.18793	-0.55561								689.4	0.674525	-0.376943	0.207851	0.0686293	-0.775391
691.5	-1.5099	3.6828	-6.247	-5.7976	0.124		691.5	1.37452	1.00299	0.61549	-0.8012	-0.74171								691.5	1.47143	0.815257	0.509011	-0.920501	-0.961491
693.6	-3.5762	2.4363	-8.396	-4.6083	1.922		693.6	-0.68957	-0.24111	-1.53224	0.38997	1.05619								693.6	-0.592655	-0.428843	-1.63872	0.270669	0.836409
695.7	-4.4503	2.2663	-6.0471	-5.203	2.108		695.7	-1.56146	-0.40871	0.81793	-0.20287	1.24209								695.7	-1.46455	-0.596443	0.711451	-0.322171	1.02231
697.8	-3.1788	0.8499	-8.6459	-7.7301	2.046		697.8	-0.28775	-1.82271	-1.7796	-2.7281	1.17999								697.8	-0.190835	-2.01044	-1.88608	-2.8474	0.960209
699.9	-4.3709	4.2494	-7.0966	-5.8471	-0.558		699.9	-1.47764	1.57919	-0.22904	-0.84324	-1.42411								699.9	-1.38073	1.39146	-0.335519	-0.962541	-1.64389
702	-4.6887	2.2097	-7.6963	-5.1039	3.7819		702	-1.79324	-0.45811	-0.82747	-0.09817	2.91569								702	-1.69633	-0.645843	-0.933949	-0.217471	2.69591
704.1	-5.0861	2.7762	-3.2484	-4.2615	2.294		704.1	-2.18843	0.11079	3.6217	0.74609	1.42769								704.1	-2.09152	-0.0769434	3.51522	0.626789	1.20791
706.2	-3.2583	2.3796	-6.4969	-3.7164	1.426		706.2	-0.35842	-0.28341	0.37446	1.29306	0.55959								706.2	-0.261505	-0.471143	0.267981	1.17376	0.339809
708.3	-2.543	1.4731	-6.197	-4.757	0.248		708.3	0.35909	-1.18751	0.67563	0.25433	-0.61851								708.3	0.456005	-1.37524	0.569151	0.135029	-0.838291
710.4	-3.1788	4.3627	-5.6473	-5.5498	2.418		710.4	-0.2745	1.70449	1.2266	-0.53661	1.55139								710.4	-0.177585	1.51676	1.12012	-0.655911	1.33161
712.5	-2.9404	4.306	-6.7468	-4.4101	2.046		712.5	-0.03389	1.65019	0.12836	0.60496	1.17929								712.5	0.0630245	1.46246	0.0218813	0.485659	0.959509
714.6	-1.5894	3.7961	-7.4964	-4.6083	1.984		714.6	1.31932	1.14268	-0.61997	0.40862	1.11719								714.6	1.41623	0.954947	-0.726449	0.289319	0.897409
716.7	-3.4172	1.983	-7.5964	-7.1851	3.8439		716.7	-0.50627	-0.66802	-0.7187	-2.16631	2.97699								716.7	-0.409355	-0.855753	-0.825179	-2.28561	2.75721
718.8	-4.6887	2.0397	-7.0966	-4.9552	1.86		718.8	-1.77556	-0.60892	-0.21763	0.06545	0.993								718.8	-1.67865	-0.796653	-0.324109	-0.0538507	0.773219
720.9	-2.2252	1.983	-5.2475	-6.64	1.674		720.9	0.69015	-0.66322	1.63273	-1.61748	0.8069								720.9	0.787065	-0.850953	1.52625	-1.73678	0.587119
723	-5.4834	5.0426	-6.3969	-4.3606	1.86		723	-2.56584	2.39878	0.4846	0.66379	0.9928								723	-2.46893	2.21105	0.378121	0.544489	0.773019
725.1	-3.0993	4.646	-5.9971	-4.5588	0.372		725.1	-0.17954	2.00458	0.88567	0.46745	-0.4953								725.1	-0.0826255	1.81685	0.779191	0.348149	-0.715081
727.2	-3.6556	3.7394	-9.6953	-4.9552	1.984		727.2	-0.73363	1.10038	-2.81127	0.07292	1.1166								727.2	-0.636715	0.912647	-2.91775	-0.0463807	0.896819
729.3	-0.7947	2.8329	-8.1961	-4.6579	3.7199		729.3	2.12948	0.19628	-1.3108	0.37208	2.8524								729.3	2.22639	0.00854663	-1.41728	0.252779	2.63262
731.4	-1.2715	1.3031	-5.6973	-5.0048	0.496		731.4	1.65489	-1.33112	1.18927	0.02705	-0.3716								731.4	1.7518	-1.51885	1.08279	-0.0922507	-0.591381
733.5	-3.2583	2.2097	-7.3465	-6.0949	-1.426		733.5	-0.3297	-0.42212	-0.45866	-1.06119	-2.2937								733.5	-0.232785	-0.609853	-0.565139	-1.18049	-2.51348
735.6	-4.4503	3.1162	-7.6963	-4.1624	5.2079		735.6	-1.51949	0.48678	-0.8072	0.87318	4.3401								735.6	-1.42258	0.299047	-0.913679	0.753879	4.12032
737.7	-0.5563	2.2097	-6.7967	-7.4328	0.124		737.7	2.37672	-0.41732	0.09367	-2.39535	-0.7439								737.7	2.47363	-0.605053	-0.0128087	-2.51465	-0.963681
739.8	-1.5099	3.2295	-5.5473	-5.5498	1.86		739.8	1.42533	0.60488	1.34434	-0.51049	0.992								739.8	1.52224	0.417147	1.23786	-0.629791	0.772219
741.9	-1.9073	2.6063	-7.0466	-5.8471	-1.55		741.9	1.03014	-0.01592	-0.1537	-0.80592	-2.4181								741.9	1.12705	-0.203653	-0.260179	-0.925221	-2.63788
744	-3.894	2.493	-8.1461	-4.3606	1.798		744	-0.95435	-0.12683	-1.25193	0.68244	0.9298								744	-0.857435	-0.314563	-1.35841	0.563139	0.710019
746.1	-4.2119	5.3825	-6.3969	-5.5498	2.356		746.1	-1.27004	2.76507	0.49854	-0.50489	1.4877								746.1	-1.17313	2.57734	0.392061	-0.624191	1.26792
748.2	-3.3377	2.0397	-7.7963	-4.6083	1.922		748.2	-0.39363	-0.57533	-0.8996	0.43847	1.05361								748.2	-0.296715	-0.763063	-1.00608	0.319169	0.833829
750.3	-1.9868	2.8896	-5.8972	-4.5092	1.426		750.3	0.95947	0.27697	1.00077	0.53944	0.55751								750.3	1.05638	0.0892366	0.894291	0.420139	0.337729
752.4	-6.4371	3.1728	-9.5954	-4.311	0.806		752.4	-3.48862	0.56257	-2.69616	0.7395	-0.06259								752.4	-3.39171	0.374837	-2.80264	0.620199	-0.282371
754.5	-3.0199	3.7394	-6.7967	-4.6579	2.232		754.5	-0.06921	1.13157	0.10381	0.39447	1.36331								754.5	0.0277045	0.943837	-0.00266874	0.275169	1.14353
756.6	-1.6689	4.2494	-7.6963	-4.8066	-0.496		756.6	1.284	1.64397	-0.79453	0.24764	-1.36479								756.6	1.38091	1.45624	-0.901009	0.128339	-1.58457
758.7	-2.3046	0.6232	-7.5464	-4.8561	1.736		758.7	0.65051	-1.97983	-0.64336	0.2	0.86711								758.7	0.747425	-2.16756	-0.749839	0.0806993	0.647329
760.8	-2.3046	2.9462	-6.7468	-6.0454	0.93		760.8	0.65272	0.34557	0.15751	-0.98743	0.06101								760.8	0.749635	0.157837	0.0510313	-1.10673	-0.158771
762.9	-0.9536	3.3428	-7.2965	-5.5003	1.302		762.9	2.00593	0.74457	-0.39093	-0.44047	0.43291								762.9	2.10284	0.556837	-0.497409	-0.559771	0.213129
765	-1.6689	2.9462	-6.1471	-5.4507	2.7899		765	1.29284	0.35037	0.75974	-0.389	1.92071								765	1.38975	0.162637	0.653261	-0.508301	1.70093
767.1	-1.9073	5.7225	-7.0966	-4.8066	1.302		767.1	1.05665	3.12907	-0.18849	0.25696	0.43271								767.1	1.15356	2.94134	-0.294969	0.137659	0.212929
769.2	-3.4967	3.3995	-6.0971	-3.4686	0.868		769.2	-0.53054	0.80847	0.81228	1.59683	-0.00139								769.2	-0.433625	0.620737	0.705801	1.47753	-0.221171
771.3	-4.2119	5.2692	-5.7472	-5.5498	5.5799		771.3	-1.24353	2.68057	1.16344	-0.4825	4.71041								771.3	-1.14662	2.49284	1.05696	-0.601801	4.49063
773.4	-1.5894	3.9661	-6.6968	-4.5588	3.5339		773.4	1.38118	1.37986	0.21511	0.51036	2.66431								773.4	1.47809	1.19213	0.108631	0.391059	2.44453
775.5	-2.6225	2.7762	-6.347	-5.5003	3.4099		775.5	0.35028	0.19236	0.56618	-0.42927	2.54022								775.5	0.447195	0.00462663	0.459701	-0.548571	2.32044
777.6	-4.2119	3.5695	-5.8972	-3.5182	0.124		777.6	-1.23691	0.98806	1.01724	1.55469	-0.74578								777.6	-1.14	0.800327	0.910761	1.43539	-0.965561
779.7	-5.404	4.2494	-4.3479	-4.3606	2.5419		779.7	-2.4268	1.67036	2.56781	0.71416	1.67202								779.7	-2.32989	1.48263	2.46133	0.594859	1.45224
781.8	-1.5894	1.8131	-7.3465	-6.2436	1.55		781.8	1.39001	-0.76354	-0.42952	-1.16698	0.68002								781.8	1.48692	-0.951273	-0.535999	-1.28628	0.460239
783.9	0.5563	3.6828	-6.247	-4.3606	-0.93		783.9	3.53792	1.10856	0.67124	0.71789	-1.80008								783.9	3.63483	0.920827	0.564761	0.598589	-2.01986
786	-1.5894	4.476	-5.6973	-7.1355	1.24		786	1.39443	1.90416	1.22221	-2.05514	0.36982								786	1.49134	1.71643	1.11573	-2.17444	0.150039
788.1	-3.9735	2.8329	-5.3474	-3.7164	1.178		788.1	-0.98746	0.26346	1.57338	1.36582	0.30772								788.1	-0.890545	0.0757266	1.4669	1.24652	0.0879389
790.2	-1.4305	3.1162	-8.1961	-4.0137	1.488		790.2	1.55775	0.54916	-1.27405	1.07039	0.61762								790.2	1.65466	0.361427	-1.38053	0.951089	0.397839
792.3	-5.6424	4.2494	-7.2965	-4.4597	0		792.3	-2.65194	1.68476	-0.37319	0.62625	-0.87048								792.3	-2.55503	1.49703	-0.479669	0.506949	-1.09026
794.4	-3.0993	3.8527	-7.2465	-5.9463	2.356		794.4	-0.10663	1.29046	-0.32192	-0.85848	1.48542								794.4	-0.00971547	1.10273	-0.428399	-0.977781	1.26564
796.5	-4.1324	2.9462	-6.8467	-6.0949	0.434		796.5	-1.13752	0.38636	0.07915	-1.00522	-0.43668								796.5	-1.04061	0.198627	-0.0273287	-1.12452	-0.656461
798.6	0	4.646	-7.5964	-6.9373	2.108		798.6	2.99709	2.08856	-0.66929	-1.84575	1.23722								798.6	3.094	1.90083	-0.775769	-1.96505	1.01744
800.7	-6.0397	2.4363	-7.0966	-4.757	1.798		800.7	-3.04041	-0.11874	-0.16822	0.33642	0.92712								800.7	-2.9435	-0.306473	-0.274699	0.217119	0.707339
802.8	-2.3046	2.0963	-4.9476	-4.311	-0.248		802.8	0.6969	-0.45635	1.98205	0.78428	-1.11898								802.8	0.793815	-0.644083	1.87557	0.664979	-1.33876
804.9	-3.0199	1.8131	-6.4469	-5.8967	-0.186		804.9	-0.01619	-0.73715	0.48402	-0.79955	-1.05707								804.9	0.0807245	-0.924883	0.377541	-0.918851	-1.27685
807	-4.2914	3.4561	-6.6968	-6.4913	1.364		807	-1.28548	0.90825	0.23538	-1.39229	0.49283								807	-1.18857	0.720517	0.128901	-1.51159	0.273049
809.1	-2.8609	2.493	-6.247	-6.6895	2.046		809.1	0.14723	-0.05245	0.68645	-1.58862	1.17473								809.1	0.244145	-0.240183	0.579971	-1.70792	0.954949
811.2	-3.2583	3.9094	-6.4469	-4.7075	1.86		811.2	-0.24796	1.36635	0.48782	0.39524	0.98863								811.2	-0.151045	1.17862	0.381341	0.275939	0.768849
813.3	-5.8013	2.4363	-5.5973	-6.5904	3.0379		813.3	-2.78875	-0.10435	1.33868	-1.48579	2.16643								813.3	-2.69184	-0.292083	1.2322	-1.60509	1.94665
815.4	-4.8477	1.8697	-7.3965	-6.9373	1.364		815.4	-1.83294	-0.66855	-0.45925	-1.83082	0.49243								815.4	-1.73603	-0.856283	-0.565729	-1.95012	0.272649
817.5	-4.9272	4.9859	-7.9462	-4.9057	2.418		817.5	-1.91023	2.45005	-1.00768	0.20264	1.54633								817.5	-1.81332	2.26232	-1.11416	0.0833393	1.32655
819.6	-3.6556	4.1927	-8.6958	-4.7075	0.62		819.6	-0.63642	1.65925	-1.75602	0.40271	-0.25177								819.6	-0.539505	1.47152	-1.8625	0.283409	-0.471551
821.7	-2.7815	1.8131	-6.6468	-5.1039	1.798		821.7	0.23989	-0.71795	0.29425	0.00817	0.92613								821.7	0.336805	-0.905683	0.187771	-0.111131	0.706349
823.8	-3.1788	2.5496	-6.9467	-4.8066	1.86		823.8	-0.1552	0.02095	-0.00438	0.30734	0.98803								823.8	-0.0582855	-0.166783	-0.110859	0.188039	0.768249
825.9	-2.3841	2.493	-7.5964	-4.0633	2.6039		825.9	0.6417	-0.03325	-0.65281	1.0525	1.73183								825.9	0.738615	-0.220983	-0.759289	0.933199	1.51205
828	-6.4371	2.2663	-7.1466	-4.8561	-0.248		828	-3.40909	-0.25755	-0.20175	0.26157	-1.12017								828	-3.31218	-0.445283	-0.308229	0.142269	-1.33995
830.1	-1.351	2.153	-5.7972	-3.8155	1.922		830.1	1.67922	-0.36846	1.14892	1.30404	1.04973								830.1	1.77613	-0.556193	1.04244	1.18474	0.829949
832.2	-3.1788	4.1927	-6.3969	-4.8066	1.922		832.2	-0.14637	1.67364	0.55049	0.3148	1.04963								832.2	-0.0494555	1.48591	0.444011	0.195499	0.829849
834.3	-1.5894	3.1162	-6.7468	-4.7075	1.178		834.3	1.44524	0.59954	0.20185	0.41577	0.30554								834.3	1.54215	0.411807	0.0953713	0.296469	0.0857589
836.4	-4.1324	3.1162	-7.2965	-5.1534	1.984		836.4	-1.09555	0.60194	-0.34658	-0.02827	1.11144								836.4	-0.998635	0.414207	-0.453059	-0.147571	0.891659
838.5	-4.5298	2.0397	-7.1466	-2.8245	1.55		838.5	-1.49074	-0.47216	-0.19541	2.3025	0.67734								838.5	-1.39383	-0.659893	-0.301889	2.1832	0.457559
840.6	-3.4967	2.153	-6.7967	-4.9057	2.4799		840.6	-0.45543	-0.35646	0.15576	0.22316	1.60714								840.6	-0.358515	-0.544193	0.0492813	0.103859	1.38736
842.7	-4.7682	2.323	-5.7972	-4.8561	2.7899		842.7	-1.72472	-0.18406	1.15652	0.27463	1.91704								842.7	-1.62781	-0.371793	1.05004	0.155329	1.69726
844.8	-0.9536	3.1728	-6.297	-4.757	0.744		844.8	2.09209	0.66814	0.65799	0.37559	-0.12896								844.8	2.189	0.480407	0.551511	0.256289	-0.348741
846.9	-3.2583	3.6828	-5.5473	-6.3922	-0.248		846.9	-0.2104	1.18054	1.40896	-1.25774	-1.12106								846.9	-0.113485	0.992807	1.30248	-1.37704	-1.34084
849	-1.2715	3.2295	-7.7963	-4.7075	1.488		849	1.77861	0.72964	-0.83878	0.42883	0.61484								849	1.87552	0.541907	-0.945259	0.309529	0.395059
851.1	-3.1788	1.8697	-5.4474	-6.3922	2.9139		851.1	-0.12649	-0.62776	1.51139	-1.25401	2.04064								851.1	-0.0295755	-0.815493	1.40491	-1.37331	1.82086
853.2	-1.0331	3.6828	-6.6468	-5.8471	0.062		853.2	2.02142	1.18774	0.31326	-0.70704	-0.81136								853.2	2.11833	1.00001	0.206781	-0.826341	-1.03114
855.3	-3.6556	3.6828	-8.246	-5.6489	0.992		855.3	-0.59887	1.19014	-1.28468	-0.50698	0.11854								855.3	-0.501955	1.00241	-1.39116	-0.626281	-0.101241
857.4	-0.7152	3.6261	-6.6468	-5.4012	2.294		857.4	2.34374	1.13584	0.31579	-0.25741	1.42044								857.4	2.44065	0.948107	0.209311	-0.376711	1.20066
859.5	-3.8146	1.8131	-7.2965	-5.203	1.426		859.5	-0.75345	-0.67477	-0.33264	-0.05735	0.55234								859.5	-0.656535	-0.862503	-0.439119	-0.176651	0.332559
861.6	-3.3377	4.2494	-8.296	-5.1534	1.364		861.6	-0.27434	1.76393	-1.33087	-0.00588	0.49024								861.6	-0.177425	1.5762	-1.43735	-0.125181	0.270459
863.7	-2.9404	2.0963	-7.5964	-4.9057	0.682		863.7	0.12517	-0.38677	-0.63001	0.24369	-0.19185								863.7	0.222085	-0.574503	-0.736489	0.124389	-0.411631
865.8	-3.2583	2.3796	-5.4974	-4.6579	2.6039		865.8	-0.19052	-0.10107	1.47026	0.49335	1.72995								865.8	-0.0936055	-0.288803	1.36378	0.374049	1.51017
867.9	-3.7351	2.7196	-6.0471	-5.1534	-0.372		867.9	-0.66511	0.24133	0.92183	-0.000282528	-1.24605								867.9	-0.568195	0.0535966	0.815351	-0.119583	-1.46583
870	-2.3046	3.1728	-8.396	-6.3922	1.55		870	0.7676	0.69693	-1.42581	-1.23722	0.67585								870	0.864515	0.509197	-1.53229	-1.35652	0.456069
872.1	-1.351	2.2097	-6.4969	-4.311	-0.124		872.1	1.72341	-0.26377	0.47456	0.84585	-0.99825								872.1	1.82032	-0.451503	0.368081	0.726549	-1.21803
874.2	-1.7483	3.0595	-7.2965	-5.3516	3.2859		874.2	1.32832	0.58843	-0.32377	-0.19289	2.41155								874.2	1.42523	0.400697	-0.430249	-0.312191	2.19177
876.3	-5.8808	2.6063	-5.9471	-4.1128	2.5419		876.3	-2.80198	0.13763	1.0269	1.04778	1.66745								876.3	-2.70507	-0.0501034	0.920421	0.928479	1.44767
878.4	-3.894	0.9632	-6.3969	-4.5588	1.178		878.4	-0.81297	-1.50307	0.57836	0.60365	0.30345								878.4	-0.716055	-1.6908	0.471881	0.484349	0.0836689
880.5	-3.4967	2.2097	-6.197	-2.9236	0.806		880.5	-0.41346	-0.25417	0.77953	2.24071	-0.06865								880.5	-0.316545	-0.441903	0.673051	2.12141	-0.288431
882.6	-3.7351	5.4392	-6.9966	-6.7886	1.488		882.6	-0.64965	2.97773	-0.0188	-1.62242	0.61325								882.6	-0.552735	2.79	-0.125279	-1.74172	0.393469
884.7	-3.2583	5.3259	-6.5469	-5.8471	1.488		884.7	-0.17064	2.86683	0.43216	-0.67906	0.61315								884.7	-0.0737255	2.6791	0.325681	-0.798361	0.393369
886.8	-6.1192	1.5298	-5.0976	-5.9463	0.062		886.8	-3.02933	-0.92687	1.88273	-0.77639	-0.81295								886.8	-2.93242	-1.1146	1.77625	-0.895691	-1.03273
888.9	-2.0662	1.9264	-6.9966	-5.5994	1.426		888.9	1.02588	-0.52788	-0.015	-0.42763	0.55095								888.9	1.12279	-0.715613	-0.121479	-0.546931	0.331169
891	-3.6556	2.0963	-5.1975	-6.194	1.302		891	-0.56131	-0.35558	1.78536	-1.02036	0.42685								891	-0.464395	-0.543313	1.67888	-1.13966	0.207069
893.1	-1.2715	3.9661	-6.8967	-4.0137	1.736		893.1	1.825	1.51662	0.08743	1.16181	0.86076								893.1	1.92191	1.32889	-0.0190487	1.04251	0.640979
895.2	-2.702	3.9661	-7.8462	-5.4507	1.86		895.2	0.39671	1.51902	-0.8608	-0.27333	0.98466								895.2	0.493625	1.33129	-0.967279	-0.392631	0.764879
897.3	-2.8609	2.0397	-6.5469	-6.2931	0.248		897.3	0.24002	-0.40498	0.43977	-1.11386	-0.62744								897.3	0.336935	-0.592713	0.333291	-1.23316	-0.847221
899.4	-1.5894	1.7564	-7.0966	-5.1039	0.062		899.4	1.51373	-0.68588	-0.10867	0.0772	-0.81354								899.4	1.61064	-0.873613	-0.215149	-0.0421007	-1.03332
901.5	-4.6093	3.1728	-5.9971	-5.1039	0.372		901.5	-1.50397	0.73292	0.9921	0.07907	-0.50364								901.5	-1.40706	0.545187	0.885621	-0.0402307	-0.723421
903.6	-4.2119	3.6261	-8.296	-4.8066	0.31		903.6	-1.10436	1.18862	-1.30553	0.37823	-0.56574								903.6	-1.00745	1.00089	-1.41201	0.258929	-0.785521
905.7	-3.4172	2.5496	-8.5959	-5.4507	3.2239		905.7	-0.30745	0.11452	-1.60417	-0.264	2.34806								905.7	-0.210535	-0.0732134	-1.71065	-0.383301	2.12828
907.8	-3.3377	2.0397	-5.4974	-5.4012	2.4799		907.8	-0.22574	-0.39298	1.4956	-0.21263	1.60396								907.8	-0.128825	-0.580713	1.38912	-0.331931	1.38418
909.9	-5.8013	6.1191	-8.8458	-4.311	1.302		909.9	-2.68713	3.68882	-1.85153	0.87943	0.42596								909.9	-2.59022	3.50109	-1.95801	0.760129	0.206179
912	-5.1656	1.983	-7.7463	-6.3427	1.426		912	-2.04922	-0.44488	-0.75076	-1.1504	0.54986								912	-1.95231	-0.632613	-0.857239	-1.2697	0.330079
914.1	-4.9272	5.1559	-6.9966	-3.5182	0.682		914.1	-1.80861	2.73042	0.000202064	1.67596	-0.19424								914.1	-1.7117	2.54269	-0.106277	1.55666	-0.414021
916.2	-1.6689	4.0227	-6.247	-4.3606	1.612		916.2	1.4519	1.59962	0.75107	0.83543	0.73566								916.2	1.54881	1.41189	0.644591	0.716129	0.515879
918.3	-2.9404	3.0595	-7.5464	-7.2346	0.806		918.3	0.18261	0.63881	-0.54706	-2.03671	-0.07044								918.3	0.279525	0.451077	-0.653539	-2.15601	-0.290221
920.4	-3.0199	1.7564	-5.5473	-3.2704	0.496		920.4	0.10532	-0.66189	1.4533	1.92936	-0.38054								920.4	0.202235	-0.849623	1.34682	1.81006	-0.600321
922.5	-3.5762	1.2465	-6.4969	-4.2615	2.046		922.5	-0.44877	-1.16939	0.50497	0.94013	1.16937								922.5	-0.351855	-1.35712	0.398491	0.820829	0.949589
924.6	-2.3841	6.3457	-6.5968	-6.3922	1.488		924.6	0.74554	3.93221	0.40634	-1.18871	0.61127								924.6	0.842455	3.74448	0.299861	-1.30801	0.391489
926.7	-3.1788	0.9065	-9.0457	-4.757	0.744		926.7	-0.04696	-1.50459	-2.0413	0.44836	-0.13283								926.7	0.0499545	-1.69232	-2.14778	0.329059	-0.352611
928.8	-3.4172	2.9462	-8.0961	-4.8066	-0.062		928.8	-0.28315	0.53751	-1.09043	0.40062	-0.93893								928.8	-0.186235	0.349777	-1.19691	0.281319	-1.15871
930.9	-6.5166	3.5128	-6.7967	-5.3516	0.372		930.9	-3.38034	1.10651	0.21024	-0.14251	-0.50503								930.9	-3.28343	0.918777	0.103761	-0.261811	-0.724811
933	-4.9272	3.1728	-7.2965	-6.5409	1.426		933	-1.78873	0.76891	-0.28829	-1.32995	0.54887								933	-1.69182	0.581177	-0.394769	-1.44925	0.329089
935.1	-3.4967	3.8527	-7.6963	-5.4012	1.984		935.1	-0.35602	1.45121	-0.68683	-0.18838	1.10677								935.1	-0.259105	1.26348	-0.793309	-0.307681	0.886989
937.2	-3.1788	2.3796	-6.6468	-3.7164	0.434		937.2	-0.03591	-0.01949	0.36394	1.49829	-0.44333								937.2	0.0610045	-0.207223	0.257461	1.37899	-0.663111
939.3	-1.1126	5.0426	-5.4974	-4.6083	2.108		939.3	2.0325	2.64591	1.51461	0.60825	1.23057								939.3	2.12941	2.45818	1.40813	0.488949	1.01079
941.4	-2.702	4.9292	-6.5968	-5.3021	0.186		941.4	0.44531	2.53491	0.41647	-0.08368	-0.69153								941.4	0.542225	2.34718	0.309991	-0.202981	-0.911311
943.5	-1.6689	1.8697	-5.3474	-4.9552	0.868		943.5	1.48062	-0.52219	1.66714	0.26508	-0.00963								943.5	1.57753	-0.709923	1.56066	0.145779	-0.229411
945.6	-1.0331	0.7932	-7.5464	-5.1039	1.55		945.6	2.11863	-1.5963	-0.53059	0.11825	0.67227								945.6	2.21554	-1.78403	-0.637069	-0.00105074	0.452489
947.7	-2.3841	2.493	-4.6478	-5.1039	1.612		947.7	0.76984	0.1059	2.36927	0.12011	0.73417								947.7	0.866755	-0.0818334	2.26279	0.000809263	0.514389
949.8	-4.3709	3.9661	-6.7468	-2.0812	1.674		949.8	-1.21475	1.5814	0.27154	3.14468	0.79607								949.8	-1.11784	1.39367	0.165061	3.02538	0.576289
951.9	-3.2583	3.6828	-6.5469	-3.6173	2.9759		951.9	-0.09995	1.3005	0.47271	1.61044	2.09788								951.9	-0.00303547	1.11277	0.366231	1.49114	1.8781
954	-4.053	3.3428	-7.8462	-4.9057	1.86		954	-0.89244	0.9629	-0.82532	0.32391	0.98188								954	-0.795525	0.775167	-0.931799	0.204609	0.762099
956.1	-5.8013	1.2465	-8.6958	-5.1039	0.868		956.1	-2.63853	-1.131	-1.67366	0.12758	-0.01022								956.1	-2.54162	-1.31873	-1.78014	0.00827926	-0.230001
958.2	-5.4834	2.7196	-8.6958	-4.8561	2.6039		958.2	-2.31842	0.3445	-1.67239	0.37724	1.72558								958.2	-2.22151	0.156767	-1.77887	0.257939	1.5058
960.3	-3.6556	3.2295	-8.7458	-5.9463	2.4799		960.3	-0.48841	0.8568	-1.72112	-0.71109	1.60148								960.3	-0.391495	0.669067	-1.8276	-0.830391	1.3817
962.4	-3.5762	3.9094	-7.6463	-5.1039	2.6039		962.4	-0.4068	1.5391	-0.62036	0.13317	1.72538								962.4	-0.309885	1.35137	-0.726839	0.0138693	1.5056
964.5	-2.6225	2.7196	-8.0961	-6.6895	3.7819		964.5	0.54911	0.3517	-1.06889	-1.45056	2.90328								964.5	0.646025	0.163967	-1.17537	-1.56986	2.6835
966.6	-3.9735	2.3796	-4.0481	-5.8471	1.736		966.6	-0.79968	0.0141	2.98038	-0.6063	0.85728								966.6	-0.702765	-0.173633	2.8739	-0.725601	0.637499
968.7	-4.4503	1.0198	-5.8472	-6.0454	4.1539		968.7	-1.27427	-1.3433	1.18255	-0.80273	3.27508								968.7	-1.17736	-1.53103	1.07607	-0.922031	3.0553
970.8	-2.6225	3.3995	-4.6977	-5.1039	1.612		970.8	0.55574	1.0388	2.33331	0.14064	0.73308								970.8	0.652655	0.851067	2.22683	0.0213393	0.513299
972.9	0.0795	3.0029	-6.347	-4.8066	3.5339		972.9	3.25995	0.6446	0.68528	0.4398	2.65488								972.9	3.35686	0.456867	0.578801	0.320499	2.4351
975	-3.3377	2.0963	-6.6968	-4.7075	1.86		975	-0.15504	-0.25961	0.33675	0.54077	0.98088								975	-0.0581255	-0.447343	0.230271	0.421469	0.761099
977.1	-6.0397	2.6629	-5.9971	-3.4686	2.4799		977.1	-2.85484	0.30939	1.03771	1.78153	1.60068								977.1	-2.75793	0.121657	0.931231	1.66223	1.3809
979.2	-3.6556	2.2097	-5.4974	-4.7075	2.108		979.2	-0.46853	-0.14141	1.53868	0.5445	1.22869								979.2	-0.371615	-0.329143	1.4322	0.425199	1.00891
981.3	-3.0993	3.7961	-9.3955	-5.0048	-0.434		981.3	0.08998	1.44739	-2.35815	0.24906	-1.31341								981.3	0.186895	1.25966	-2.46463	0.129759	-1.53319
983.4	-4.6093	2.0963	-7.6963	-4.2119	1.612		983.4	-1.41781	-0.25001	-0.65769	1.04383	0.73249								983.4	-1.3209	-0.437743	-0.764169	0.924529	0.512709
985.5	-5.0066	3.6261	-6.9966	-5.1039	2.17		985.5	-1.8129	1.28219	0.04328	0.1537	1.29039								985.5	-1.71599	1.09446	-0.0631987	0.0343993	1.07061
987.6	-3.0993	2.8896	-7.2465	-5.748	0.31		987.6	0.09661	0.54809	-0.20535	-0.48854	-0.56971								987.6	0.193525	0.360357	-0.311829	-0.607841	-0.789491
989.7	-4.2914	3.3428	-7.2965	-3.32	1.86		989.7	-1.09328	1.00369	-0.25408	1.94133	0.98019								989.7	-0.996365	0.815957	-0.360559	1.82203	0.760409
991.8	-5.0861	2.0963	-6.6968	-4.757	3.2239		991.8	-1.88577	-0.24041	0.34688	0.50619	2.34399								991.8	-1.78886	-0.428143	0.240401	0.386889	2.12421
993.9	-3.6556	1.983	-7.6963	-5.4507	2.046		993.9	-0.45306	-0.35131	-0.65135	-0.18564	1.16599								993.9	-0.356145	-0.539043	-0.757829	-0.304941	0.946209
996	-0.1589	4.7593	-8.9457	-4.2615	-0.062		996	3.04585	2.42739	-1.89948	1.00542	-0.94211								996	3.14276	2.23966	-2.00596	0.886119	-1.16189
998.1	-3.6556	4.136	-7.3465	-5.5498	1.302		998.1	-0.44864	1.80649	-0.29902	-0.28101	0.42179								998.1	-0.351725	1.61876	-0.405499	-0.400311	0.202009
1000.2	-1.2715	4.0794	-7.0966	-4.3606	1.426		1000.2	1.93767	1.75229	-0.04785	0.91006	0.54569								1000.2	2.03458	1.56456	-0.154329	0.790759	0.325909
1002.3	-0.3974	4.1927	-6.7468	-4.9552	2.7279		1002.3	2.81397	1.86799	0.30322	0.31732	1.84749								1002.3	2.91088	1.68026	0.196741	0.198019	1.62771
1004.4	-3.7351	3.3428	-7.1965	-4.1624	2.5419		1004.4	-0.52152	1.02048	-0.14521	1.11199	1.66139								1004.4	-0.424605	0.832747	-0.251689	0.992689	1.44161
1006.5	-4.6093	2.0963	-6.1471	-4.4597	2.294		1006.5	-1.39351	-0.22362	0.90545	0.81655	1.41339								1006.5	-1.2966	-0.411353	0.798971	0.697249	1.19361
1008.6	-3.6556	3.2862	-6.5968	-4.2615	2.294		1008.6	-0.4376	0.96868	0.45702	1.01662	1.4133								1008.6	-0.340685	0.780947	0.350541	0.897319	1.19352
1010.7	-2.3841	2.7196	-4.148	-4.311	0.62		1010.7	0.83611	0.40448	2.90709	0.96898	-0.2608								1010.7	0.933025	0.216747	2.80061	0.849679	-0.480581
1012.8	-0.5563	4.306	-7.7963	-5.6985	0.062		1012.8	2.66612	1.99328	-0.73995	-0.41665	-0.8189								1012.8	2.76303	1.80555	-0.846429	-0.535951	-1.03868
1014.9	-4.2119	0.7366	-6.4969	-3.7164	-0.372		1014.9	-0.98727	-1.57372	0.56072	1.56732	-1.253								1014.9	-0.890355	-1.76145	0.454241	1.44802	-1.47278
1017	-2.8609	1.7564	-8.5459	-4.6083	0.992		1017	0.36594	-0.55152	-1.48701	0.67728	0.1109								1017	0.462855	-0.739253	-1.59349	0.557979	-0.108881
1019.1	-3.5762	2.5496	-7.4964	-5.5003	1.55		1019.1	-0.34715	0.24408	-0.43625	-0.21285	0.6688								1019.1	-0.250235	0.0563466	-0.542729	-0.332151	0.449019
1021.2	-2.3046	3.9094	-6.3969	-5.9463	3.2239		1021.2	0.92666	1.60628	0.66452	-0.65699	2.3426								1021.2	1.02357	1.41855	0.558041	-0.776291	2.12282
1023.3	-1.4305	3.6828	-6.7967	-5.748	1.178		1023.3	1.80297	1.38208	0.26599	-0.45682	0.2966								1023.3	1.89988	1.19435	0.159511	-0.576121	0.0768189
1025.4	-4.2914	2.0963	-6.6468	-3.3695	2.6039		1025.4	-1.05572	-0.20202	0.41716	1.92354	1.7224								1025.4	-0.958805	-0.389753	0.310681	1.80424	1.50262
1027.5	-3.2583	3.9661	-6.0971	-3.6669	1.736		1027.5	-0.02042	1.67018	0.96812	1.62801	0.8544								1027.5	0.0764945	1.48245	0.861641	1.50871	0.634619
1029.6	-5.1656	2.8896	-5.4974	-5.5003	0.868		1029.6	-1.92551	0.59608	1.56909	-0.20352	-0.0137								1029.6	-1.8286	0.408347	1.46261	-0.322821	-0.233481
1031.7	-5.245	2.153	-7.8962	-4.1128	2.108		1031.7	-2.0027	-0.13812	-0.82844	1.18584	1.2262								1031.7	-1.90579	-0.325853	-0.934919	1.06654	1.00642
1033.8	-1.9868	3.7394	-9.2955	-5.1534	1.86		1033.8	1.25771	1.45067	-2.22648	0.14711	0.9781								1033.8	1.35462	1.26294	-2.33296	0.0278093	0.758319
1035.9	-4.1324	2.0397	-8.0461	-2.6758	0.93		1035.9	-0.88568	-0.24663	-0.97581	2.62657	0.048								1035.9	-0.788765	-0.434363	-1.08229	2.50727	-0.171781
1038	-3.4172	2.7762	-6.6468	-3.7164	0.744		1038	-0.16827	0.49227	0.42476	1.58784	-0.13809								1038	-0.0713555	0.304537	0.318281	1.46854	-0.357871
1040.1	-5.245	2.3796	-7.0466	-5.5003	2.5419		1040.1	-1.99386	0.09807	0.02623	-0.1942	1.65971								1040.1	-1.89695	-0.0896634	-0.0802487	-0.313501	1.43993
1042.2	-4.5298	3.8527	-6.1471	-5.5498	1.364		1042.2	-1.27645	1.57357	0.92699	-0.24183	0.48171								1042.2	-1.17954	1.38584	0.820511	-0.361131	0.261929
1044.3	-4.4503	4.5326	-7.3465	-5.3021	1.302		1044.3	-1.19474	2.25587	-0.27114	0.00773	0.41961								1044.3	-1.09783	2.06814	-0.377619	-0.111571	0.199829
1046.4	-5.404	0.8499	-7.3465	-4.8066	0.124		1046.4	-2.14623	-1.42443	-0.26987	0.5051	-0.75849								1046.4	-2.04932	-1.61216	-0.376349	0.385799	-0.978271
1048.5	-1.2715	2.0397	-5.3974	-5.203	1.054		1048.5	1.98848	-0.23223	1.68049	0.11057	0.17141								1048.5	2.08539	-0.419963	1.57401	-0.00873074	-0.0483711
1050.6	-6.3576	3.5695	-7.0466	-5.4507	0.62		1050.6	-3.09541	1.29997	0.03256	-0.13527	-0.26269								1050.6	-2.9985	1.11224	-0.0739187	-0.254571	-0.482471
1052.7	-3.4172	2.0397	-6.0471	-4.8066	0.62		1052.7	-0.15281	-0.22743	1.03333	0.5107	-0.26279								1052.7	-0.0558955	-0.415163	0.926851	0.391399	-0.482571
1054.8	-0.7152	1.4731	-7.5964	-5.5498	0.93		1054.8	2.5514	-0.79163	-0.51471	-0.23064	0.04711								1054.8	2.64831	-0.979363	-0.621189	-0.349941	-0.172671
1056.9	-4.5298	2.2097	-7.3465	-8.1265	-0.558		1056.9	-1.26099	-0.05263	-0.26354	-2.80547	-1.44099								1056.9	-1.16408	-0.240363	-0.370019	-2.92477	-1.66077
1059	-5.0861	2.6629	-7.3965	-4.8561	0.744		1059	-1.81508	0.40297	-0.31227	0.46679	-0.13909								1059	-1.71817	0.215237	-0.418749	0.347489	-0.358871
1061.1	-4.6887	5.7225	-5.6473	-6.2436	-0.31		1061.1	-1.41547	3.46497	1.4382	-0.91884	-1.19319								1061.1	-1.31856	3.27724	1.33172	-1.03814	-1.41297
1063.2	-6.1987	1.7564	-6.7468	-6.0949	3.1619		1063.2	-2.92326	-0.49874	0.33996	-0.76827	2.27861								1063.2	-2.82635	-0.686473	0.233481	-0.887571	2.05883
1065.3	-4.2119	3.3995	-6.9467	-5.5994	2.356		1065.3	-0.93425	1.14676	0.14133	-0.27091	1.47261								1065.3	-0.837335	0.959027	0.0348513	-0.390211	1.25283
1067.4	-2.1457	3.0595	-7.7463	-3.6173	2.046		1067.4	1.13416	0.80916	-0.657	1.71306	1.16252								1067.4	1.23107	0.621427	-0.763479	1.59376	0.942739
1069.5	-2.702	2.8896	-6.9966	-3.32	0.62		1069.5	0.58007	0.64166	0.09396	2.01222	-0.26358								1069.5	0.676985	0.453927	-0.0125187	1.89292	-0.483361
1071.6	-4.2119	1.6997	-7.5964	-4.5092	2.418		1071.6	-0.92762	-0.54584	-0.50457	0.82489	1.53432								1071.6	-0.830705	-0.733573	-0.611049	0.705589	1.31454
1073.7	-3.0199	1.8697	-7.6963	-2.7254	2.046		1073.7	0.26659	-0.37344	-0.6032	2.61055	1.16222								1073.7	0.363505	-0.561173	-0.709679	2.49125	0.942439
1075.8	-5.404	4.0794	-4.8977	-4.4101	1.426		1075.8	-2.1153	1.83866	2.19667	0.92772	0.54212								1075.8	-2.01839	1.65093	2.09019	0.808419	0.322339
1077.9	-3.2583	2.153	-6.1471	-5.1039	2.8519		1077.9	0.0326	-0.08534	0.94853	0.23579	1.96792								1077.9	0.129515	-0.273073	0.842051	0.116489	1.74814
1080	-3.1788	2.6063	-5.1475	-3.6173	-0.372		1080	0.11431	0.37036	1.9494	1.72425	-1.25608								1080	0.211225	0.182627	1.84292	1.60495	-1.47586
1082.1	-4.9272	2.0397	-6.6968	-5.1039	2.9759		1082.1	-1.63188	-0.19384	0.40137	0.23952	2.09172								1082.1	-1.53497	-0.381573	0.294891	0.120219	1.87194
1084.2	-1.5099	2.9462	-6.6468	-3.5182	1.364		1084.2	1.78763	0.71506	0.45263	1.82708	0.47972								1084.2	1.88454	0.527327	0.346151	1.70778	0.259939
1086.3	-3.4172	3.0595	-9.2955	-4.5588	3.0379		1086.3	-0.11746	0.83076	-2.1948	0.78835	2.15352								1086.3	-0.0205455	0.643027	-2.30128	0.669049	1.93374
1088.4	-2.543	4.0227	-6.297	-4.9552	2.4799		1088.4	0.75895	1.79636	0.80497	0.39381	1.59542								1088.4	0.855865	1.60863	0.698491	0.274509	1.37564
1090.5	-3.4967	2.6629	-7.8962	-4.311	4.0919		1090.5	-0.19254	0.43895	-0.79297	1.03988	3.20732								1090.5	-0.0956255	0.251217	-0.899449	0.920579	2.98754
1092.6	-3.8146	3.0595	-4.7977	-5.1039	2.4799		1092.6	-0.50823	0.83795	2.3068	0.24885	1.59522								1092.6	-0.411315	0.650217	2.20032	0.129549	1.37544
1094.7	-4.5298	0.9632	-6.3969	-5.0543	2.6659		1094.7	-1.22122	-1.25595	0.70887	0.30031	1.78112								1094.7	-1.12431	-1.44368	0.602391	0.181009	1.56134
1096.8	-2.2252	3.1162	-8.1461	-4.0137	2.418		1096.8	1.08559	0.89945	-1.03906	1.34278	1.53313								1096.8	1.1825	0.711717	-1.14554	1.22348	1.31335
1098.9	-5.0861	3.0029	-6.6968	-3.0722	1.984		1098.9	-1.7731	0.78855	0.4115	2.28614	1.09903								1098.9	-1.67619	0.600817	0.305021	2.16684	0.879249
1101	-2.0662	4.5326	-6.4469	-4.3606	-0.062		1101	1.24901	2.32065	0.66267	0.99961	-0.94707								1101	1.34592	2.13292	0.556191	0.880309	-1.16685
1103.1	-5.8808	3.0029	-7.7963	-5.5498	3.9059		1103.1	-2.56339	0.79335	-0.68546	-0.18773	3.02073								1103.1	-2.46648	0.605617	-0.791939	-0.307031	2.80095
1105.2	-1.1126	3.3995	-7.9962	-5.9958	3.5339		1105.2	2.20702	1.19235	-0.8841	-0.63186	2.64863								1105.2	2.30393	1.00462	-0.990579	-0.751161	2.42885
1107.3	-3.0993	2.323	-6.297	-5.2525	4.7119		1107.3	0.22253	0.11825	0.81637	0.11331	3.82653								1107.3	0.319445	-0.0694834	0.709891	-0.00599074	3.60675
1109.4	-3.3377	2.0963	-7.6463	-4.0633	-1.178		1109.4	-0.01366	-0.10605	-0.53166	1.30437	-2.06347								1109.4	0.0832545	-0.293783	-0.638139	1.18507	-2.28325
1111.5	-1.7483	2.3796	-6.247	-5.9958	2.6039		1111.5	1.57795	0.17965	0.86891	-0.62626	1.71833								1111.5	1.67486	-0.00808337	0.762431	-0.745561	1.49855
1113.6	-3.9735	1.3598	-4.8977	-3.6173	1.364		1113.6	-0.64504	-0.83775	2.21947	1.7541	0.47833								1113.6	-0.548125	-1.02548	2.11299	1.6348	0.258549
1115.7	-3.0199	2.6063	-6.3969	-5.1534	0.186		1115.7	0.31077	0.41115	0.72154	0.21987	-0.69977								1115.7	0.407685	0.223417	0.615061	0.100569	-0.919551
1117.8	-2.8609	3.2295	-5.9471	-5.1534	3.5959		1117.8	0.47198	1.03675	1.17261	0.22173	2.71003								1117.8	0.568895	0.849017	1.06613	0.102429	2.49025
1119.9	-3.4967	2.7762	-6.1471	-5.7976	0.496		1119.9	-0.16161	0.58584	0.97387	-0.4206	-0.38997								1119.9	-0.0646955	0.398107	0.867391	-0.539901	-0.609751
1122	-6.755	1.7564	-6.4469	-4.5588	4.0919		1122	-3.4177	-0.43156	0.67534	0.82007	3.20583								1122	-3.32079	-0.619293	0.568861	0.700769	2.98605
1124.1	-4.5298	2.493	-7.2465	-6.5409	2.294		1124.1	-1.19029	0.30744	-0.12299	-1.16017	1.40783								1124.1	-1.09338	0.119707	-0.229469	-1.27947	1.18805
1126.2	-5.1656	3.7394	-6.7967	-5.203	0.806		1126.2	-1.82388	1.55624	0.32807	0.1796	-0.08026								1126.2	-1.72697	1.36851	0.221591	0.0602993	-0.300041
1128.3	-3.7351	3.1162	-7.7463	-6.4418	0.186		1128.3	-0.39118	0.93544	-0.62026	-1.05734	-0.70036								1128.3	-0.294265	0.747707	-0.726739	-1.17664	-0.920141
1130.4	-1.8278	4.1927	-5.9971	-3.5678	-1.116		1130.4	1.51833	2.01434	1.13021	1.81853	-2.00246								1130.4	1.61524	1.82661	1.02373	1.69923	-2.22224
1132.5	-1.8278	2.5496	-5.6973	-5.748	1.86		1132.5	1.52054	0.37364	1.43128	-0.35981	0.97344								1132.5	1.61745	0.185907	1.3248	-0.479111	0.753659
1134.6	-5.0066	2.8896	-7.5964	-6.3922	2.418		1134.6	-1.65605	0.71604	-0.46656	-1.00214	1.53134								1134.6	-1.55914	0.528307	-0.573039	-1.12144	1.31156
1136.7	-2.8609	2.8896	-7.5464	-6.64	1.426		1136.7	0.49186	0.71844	-0.41529	-1.24808	0.53924								1136.7	0.588775	0.530707	-0.521769	-1.36738	0.319459
1138.8	1.1921	2.7196	-7.7463	-5.6985	2.5419		1138.8	4.54707	0.55084	-0.61392	-0.30471	1.65504								1138.8	4.64398	0.363107	-0.720399	-0.424011	1.43526
1140.9	-3.3377	4.7026	-5.1975	-5.2525	2.7279		1140.9	0.01948	2.53624	1.93614	0.14316	1.84094								1140.9	0.116395	2.34851	1.82966	0.0238593	1.62116
1143	-1.8278	3.2862	-6.6968	-6.4418	-0.124		1143	1.53159	1.12224	0.43811	-1.04428	-1.01106								1143	1.6285	0.934507	0.331631	-1.16358	-1.23084
1145.1	-3.894	3.1162	-6.247	-5.4012	0.93		1145.1	-0.5324	0.95464	0.88918	-0.00181	0.04284								1145.1	-0.435485	0.766907	0.782701	-0.121111	-0.176941
1147.2	-4.6887	4.136	-8.246	-4.757	1.178		1147.2	-1.32489	1.97684	-1.10855	0.64425	0.29074								1147.2	-1.22798	1.78911	-1.21503	0.524949	0.0709589
1149.3	-3.4967	4.0794	-8.1961	-5.6489	1.55		1149.3	-0.13068	1.92263	-1.05739	-0.24578	0.66264								1149.3	-0.0337655	1.7349	-1.16387	-0.365081	0.442859
1151.4	-5.1656	2.8896	-5.2475	-3.8155	2.356		1151.4	-1.79737	0.73523	1.89248	1.58948	1.46854								1151.4	-1.70046	0.547497	1.786	1.47018	1.24876
1153.5	-5.6424	1.9264	-5.8972	-4.2615	2.7899		1153.5	-2.27197	-0.22557	1.24405	1.14535	1.90234								1153.5	-2.17506	-0.413303	1.13757	1.02605	1.68256
1155.6	-4.1324	2.323	-5.6473	-3.8651	1.736		1155.6	-0.75976	0.17343	1.49521	1.54362	0.84835								1155.6	-0.662845	-0.0143034	1.38873	1.42432	0.628569
1157.7	-1.4305	2.6629	-5.6973	-4.4597	0.806		1157.7	1.94435	0.51573	1.44648	0.95088	-0.08175								1157.7	2.04126	0.327997	1.34	0.831579	-0.301531
1159.8	-2.8609	4.2494	-6.197	-5.8967	3.0999		1159.8	0.51616	2.10463	0.94805	-0.48425	2.21205								1159.8	0.613075	1.9169	0.841571	-0.603551	1.99227
1161.9	-4.5298	2.0397	-6.347	-4.5588	-0.868		1161.9	-1.15053	-0.10267	0.79931	0.85551	-1.75595								1161.9	-1.05362	-0.290403	0.692831	0.736209	-1.97573
1164	-5.0861	2.6063	-8.246	-5.7976	0.992		1164	-1.70462	0.46633	-1.09842	-0.38142	0.10395								1164	-1.60771	0.278597	-1.2049	-0.500721	-0.115831
1166.1	-5.8013	3.1162	-6.9467	-6.5409	2.6039		1166.1	-2.41761	0.97863	0.20215	-1.12286	1.71575								1166.1	-2.3207	0.790897	0.0956713	-1.24216	1.49597
1168.2	-2.3046	3.2295	-7.2465	-5.9958	-2.6039		1168.2	1.0813	1.09433	-0.09638	-0.57589	-3.49215								1168.2	1.17821	0.906597	-0.202859	-0.695191	-3.71193
1170.3	-7.0728	5.0992	-5.5973	-4.1624	1.674		1170.3	-3.68469	2.96643	1.55408	1.25938	0.78565								1170.3	-3.58778	2.7787	1.4476	1.14008	0.565869
1172.4	-2.7815	1.6997	-6.7967	-5.3021	-0.682		1172.4	0.60882	-0.43067	0.35595	0.12154	-1.57045								1172.4	0.705735	-0.618403	0.249471	0.00223926	-1.79023
1174.5	-3.2583	3.5128	-6.0971	-3.766	-0.93		1174.5	0.13423	1.38483	1.05682	1.65951	-1.81855								1174.5	0.231145	1.1971	0.950341	1.54021	-2.03833
1176.6	-5.9603	3.0029	-7.8962	-4.2119	3.8439		1176.6	-2.56556	0.87733	-0.74102	1.21547	2.95525								1176.6	-2.46865	0.689597	-0.847499	1.09617	2.73547
1178.7	-3.3377	1.6431	-7.5464	-2.2794	3.1619		1178.7	0.05924	-0.48008	-0.38995	3.14984	2.27315								1178.7	0.156155	-0.667813	-0.496429	3.03054	2.05337
1180.8	-0.7947	3.4561	-6.297	-5.9958	0.744		1180.8	2.60445	1.33532	0.86072	-0.5647	-0.14485								1180.8	2.70136	1.14759	0.754241	-0.684001	-0.364631
1182.9	-3.4172	3.5695	-6.197	-2.9236	-0.93		1182.9	-0.01584	1.45112	0.96199	2.50937	-1.81894								1182.9	0.0810745	1.26339	0.855511	2.39007	-2.03872
1185	-5.245	4.1927	-7.7963	-4.1128	1.364		1185	-1.84143	2.07672	-0.63605	1.32204	0.47496								1185	-1.74452	1.88899	-0.742529	1.20274	0.255179
1187.1	-6.9139	3.3428	-7.1466	-5.5003	3.1619		1187.1	-3.50812	1.22922	0.01492	-0.0636	2.27276								1187.1	-3.41121	1.04149	-0.0915587	-0.182901	2.05298
1189.2	-2.3046	3.1728	-6.5968	-4.4597	2.8519		1189.2	1.10339	1.06162	0.56599	0.97887	1.96266								1189.2	1.2003	0.873887	0.459511	0.859569	1.74288
1191.3	-5.0066	3.1162	-6.7468	-4.1624	3.7199		1191.3	-1.5964	1.00742	0.41725	1.27803	2.83056								1191.3	-1.49949	0.819687	0.310771	1.15873	2.61078
1193.4	-1.5099	5.3259	-5.5973	-4.0633	0.124		1193.4	1.90251	3.21952	1.56802	1.379	-0.76544								1193.4	1.99942	3.03179	1.46154	1.2597	-0.985221
1195.5	-3.5762	3.4561	-6.5469	-4.3606	1.55		1195.5	-0.16158	1.35212	0.61969	1.08356	0.66046								1195.5	-0.0646655	1.16439	0.513211	0.964259	0.440679
1197.6	-4.5298	3.3428	-6.5469	-4.9057	2.108		1197.6	-1.11297	1.24122	0.62095	0.54033	1.21836								1197.6	-1.01606	1.05349	0.514471	0.421029	0.998579
1199.7	0	1.983	-7.4964	-3.9642	3.1619		1199.7	3.41904	-0.11618	-0.32728	1.4837	2.27216								1199.7	3.51595	-0.303913	-0.433759	1.3644	2.05238
1201.8	-5.3245	2.8329	-7.1466	-6.5904	2.4799		1201.8	-1.90326	0.73612	0.02379	-1.14064	1.59006								1201.8	-1.80635	0.548387	-0.0826887	-1.25994	1.37028
1203.9	-3.6556	2.0397	-6.4469	-5.3516	1.364		1203.9	-0.23215	-0.05468	0.72476	0.10003	0.47406								1203.9	-0.135235	-0.242413	0.618281	-0.0192707	0.254279
1206	-3.6556	1.8697	-6.9467	-4.9057	2.232		1206	-0.22994	-0.22228	0.22622	0.54779	1.34196								1206	-0.133025	-0.410013	0.119741	0.428489	1.12218
1208.1	-6.1192	1.4731	-6.6968	-7.5815	1.426		1208.1	-2.69133	-0.61649	0.47739	-2.12614	0.53586								1208.1	-2.59442	-0.804223	0.370911	-2.24544	0.316079
1210.2	-2.8609	4.0794	-7.4964	-5.4012	0.62		1210.2	0.56918	1.99221	-0.32094	0.05602	-0.27024								1210.2	0.666095	1.80448	-0.427419	-0.0632807	-0.490021
1212.3	-5.404	2.8896	-7.1965	-6.9373	1.302		1212.3	-1.97171	0.80481	-0.01978	-1.47821	0.41167								1212.3	-1.8748	0.617077	-0.126259	-1.59751	0.191889
1214.4	-3.0199	2.2097	-5.6473	-6.0949	0.868		1214.4	0.4146	0.12731	1.53069	-0.63394	-0.02243								1214.4	0.511515	-0.0604234	1.42421	-0.753241	-0.242211
1216.5	-1.7483	2.5496	-5.8972	-5.0048	1.922		1216.5	1.68841	0.46961	1.28206	0.45802	1.03147								1216.5	1.78532	0.281877	1.17558	0.338719	0.811689
1218.6	-2.4636	3.3428	-8.1961	-5.9463	-0.372		1218.6	0.97532	1.26521	-1.01557	-0.48161	-1.26263								1218.6	1.07223	1.07748	-1.12205	-0.600911	-1.48241
1220.7	-3.0199	1.6431	-6.9467	-5.4012	-1.798		1220.7	0.42123	-0.43209	0.23509	0.06535	-2.68873								1220.7	0.518145	-0.619823	0.128611	-0.0539507	-2.90851
1222.8	-2.3841	2.7196	-5.1975	-4.4101	1.24		1222.8	1.05924	0.64681	1.98556	1.05832	0.34917								1222.8	1.15615	0.459077	1.87908	0.939019	0.129389
1224.9	-1.7483	1.2465	-8.4459	-5.203	0.806		1224.9	1.69725	-0.82389	-1.26157	0.26728	-0.08493								1224.9	1.79416	-1.01162	-1.36805	0.147979	-0.304711
1227	-1.9868	2.5496	-6.5469	-5.8471	1.798		1227	1.46095	0.48161	0.63869	-0.37495	0.90697								1227	1.55786	0.293877	0.532211	-0.494251	0.687189
1229.1	-2.9404	0.9632	-6.6468	-6.3427	2.17		1229.1	0.50956	-1.10239	0.54006	-0.86868	1.27887								1229.1	0.606475	-1.29012	0.433581	-0.987981	1.05909
1231.2	-3.4172	2.6063	-7.2465	-6.8877	0.558		1231.2	0.03497	0.54311	-0.05837	-1.41182	-0.33323								1231.2	0.131885	0.355377	-0.164849	-1.53112	-0.553011
1233.3	-5.245	3.9094	-7.4964	-3.8155	2.9759		1233.3	-1.79062	1.84861	-0.30701	1.66225	2.08457								1233.3	-1.69371	1.66088	-0.413489	1.54295	1.86479
1235.4	-6.2781	2.493	-8.8458	-3.6173	2.046		1235.4	-2.82151	0.4346	-1.65514	1.86231	1.15457								1235.4	-2.7246	0.246867	-1.76162	1.74301	0.934789
1237.5	-1.5099	1.8697	-7.5964	-4.5092	-0.434		1237.5	1.9489	-0.1863	-0.40447	0.97228	-1.32553								1237.5	2.04581	-0.374033	-0.510949	0.852979	-1.54531
1239.6	-5.7219	1.5298	-7.2965	-3.9146	3.5339		1239.6	-2.26089	-0.5238	-0.1033	1.56874	2.64227								1239.6	-2.16398	-0.711533	-0.209779	1.44944	2.42249
1241.7	-4.5298	0.8499	-7.3965	-5.8471	0.372		1241.7	-1.06658	-1.2013	-0.20204	-0.36189	-0.51972								1241.7	-0.969665	-1.38903	-0.308519	-0.481191	-0.739501
1243.8	-3.9735	1.1332	-5.6473	-6.9868	1.674		1243.8	-0.50807	-0.9156	1.54843	-1.49973	0.78218								1243.8	-0.411155	-1.10333	1.44195	-1.61903	0.562399
1245.9	-1.351	2.7762	-7.3465	-4.1624	-0.434		1245.9	2.11664	0.7298	-0.1495	1.32654	-1.32592								1245.9	2.21355	0.542067	-0.255979	1.20724	-1.5457
1248	-8.106	1.9264	-6.8967	-3.6669	2.4799		1248	-4.63615	-0.1176	0.30156	1.82391	1.58788								1248	-4.53924	-0.305333	0.195081	1.70461	1.3681
1250.1	-8.0265	1.5298	-6.7468	-5.9958	2.4799		1250.1	-4.55444	-0.5118	0.45273	-0.50313	1.58778								1250.1	-4.45753	-0.699533	0.346251	-0.622431	1.368
1252.2	-4.2914	1.0198	-6.6468	-2.7749	1.798		1252.2	-0.81714	-1.0194	0.554	2.71964	0.90578								1252.2	-0.720225	-1.20713	0.447521	2.60034	0.685999
1254.3	-2.9404	3.0029	-6.9467	-4.9552	1.55		1254.3	0.53607	0.9661	0.25536	0.5412	0.65768								1254.3	0.632985	0.778367	0.148881	0.421899	0.437899
1256.4	-4.6093	2.8896	-6.9467	-4.4101	1.364		1256.4	-1.13062	0.8552	0.25663	1.08817	0.47158								1256.4	-1.03371	0.667467	0.150151	0.968869	0.251799
1258.5	-3.6556	4.7026	-6.4469	-5.4012	4.0919		1258.5	-0.17471	2.6706	0.7577	0.09893	3.19938								1258.5	-0.0777955	2.48287	0.651221	-0.0203707	2.9796
1260.6	-1.5894	4.3627	-8.296	-5.3516	1.55		1260.6	1.8937	2.3331	-1.09013	0.1504	0.65738								1260.6	1.99061	2.14537	-1.19661	0.0310993	0.437599
1262.7	-4.053	3.1728	-8.5959	-7.5815	2.9759		1262.7	-0.56769	1.1456	-1.38877	-2.07763	2.08318								1262.7	-0.470775	0.957867	-1.49525	-2.19693	1.8634
1264.8	-1.6689	4.136	-6.5469	-4.6083	2.4799		1264.8	1.81862	2.11119	0.6615	0.89743	1.58708								1264.8	1.91553	1.92346	0.555021	0.778129	1.3673
1266.9	-3.9735	4.4193	-7.6463	-4.4597	2.8519		1266.9	-0.48377	2.39689	-0.43663	1.0479	1.95898								1266.9	-0.386855	2.20916	-0.543109	0.928599	1.7392
1269	-3.1788	2.0397	-8.0961	-4.757	2.8519		1269	0.31314	0.01969	-0.88517	0.75246	1.95888								1269	0.410055	-0.168043	-0.991649	0.633159	1.7391
1271.1	-5.0066	2.8896	-7.3465	-5.8471	1.736		1271.1	-1.51245	0.87199	-0.1343	-0.33577	0.84289								1271.1	-1.41554	0.684257	-0.240779	-0.455071	0.623109
1273.2	-3.8146	3.7961	-8.8957	-6.7391	2.5419		1273.2	-0.31824	1.78089	-1.68223	-1.22591	1.64869								1273.2	-0.221325	1.59316	-1.78871	-1.34521	1.42891
1275.3	-3.894	0.8499	-6.347	-5.8471	0.496		1275.3	-0.39543	-1.16291	0.86774	-0.33204	-0.39731								1275.3	-0.298515	-1.35064	0.761261	-0.451341	-0.617091
1277.4	-4.6887	2.323	-7.0466	-3.9642	-1.426		1277.4	-1.18793	0.31259	0.1694	1.55273	-2.31941								1277.4	-1.09102	0.124857	0.0629213	1.43343	-2.53919
1279.5	-1.4305	3.0029	-7.6963	-5.0543	2.17		1279.5	2.07248	0.99489	-0.47903	0.46449	1.27649								1279.5	2.16939	0.807157	-0.585509	0.345189	1.05671
1281.6	-5.9603	3.2295	-7.6463	-5.5994	0.806		1281.6	-2.45511	1.22389	-0.42776	-0.07874	-0.08761								1281.6	-2.3582	1.03616	-0.534239	-0.198041	-0.307391
1283.7	-3.4172	4.7026	-6.4469	-6.2931	2.7279		1283.7	0.0902	2.69939	0.7729	-0.77058	1.83419								1283.7	0.187115	2.51166	0.666421	-0.889881	1.61441
1285.8	-1.8278	2.0963	-7.3465	-4.3606	-1.612		1285.8	1.68181	0.09549	-0.12543	1.16379	-2.50581								1285.8	1.77872	-0.0922434	-0.231909	1.04449	-2.72559
1287.9	-2.9404	3.3995	-8.5959	-4.757	1.674		1287.9	0.57142	1.40109	-1.37356	0.76925	0.78009								1287.9	0.668335	1.21336	-1.48004	0.649949	0.560309
1290	-4.2914	-0.1133	-6.8467	-4.311	0.682		1290	-0.77737	-2.10931	0.3769	1.21712	-0.21201								1290	-0.680455	-2.29704	0.270421	1.09782	-0.431791
1292.1	-1.7483	4.4193	-7.5964	-4.1128	2.17		1292.1	1.76794	2.42569	-0.37153	1.41719	1.27589								1292.1	1.86485	2.23796	-0.478009	1.29789	1.05611
1294.2	-2.7815	3.2862	-7.7463	-3.766	1.302		1294.2	0.73695	1.29498	-0.52016	1.76585	0.40779								1294.2	0.833865	1.10725	-0.626639	1.64655	0.188009
1296.3	-3.9735	0.9632	-6.6468	-6.4418	-0.868		1296.3	-0.45284	-1.02562	0.58061	-0.90808	-1.76231								1296.3	-0.355925	-1.21335	0.474131	-1.02738	-1.98209
1298.4	-3.2583	1.8131	-7.1965	-5.203	0.248		1298.4	0.26457	-0.17332	0.03217	0.33258	-0.64641								1298.4	0.361485	-0.361053	-0.0743087	0.213279	-0.866191
1300.5	-3.4172	2.9462	-6.4969	-6.4418	0.682		1300.5	0.10788	0.96218	0.73304	-0.90435	-0.2125								1300.5	0.204795	0.774447	0.626561	-1.02365	-0.432281
1302.6	-3.4967	1.5864	-6.9966	-5.5498	1.302		1302.6	0.03058	-0.39522	0.23461	-0.01049	0.4074								1302.6	0.127495	-0.582953	0.128131	-0.129791	0.187619
1304.7	-4.3709	3.5695	-7.3465	-5.2525	-1.798		1304.7	-0.84141	1.59028	-0.11403	0.28868	-2.6927								1304.7	-0.744495	1.40255	-0.220509	0.169379	-2.91248
1306.8	-3.8146	3.1162	-6.9966	-4.2119	1.302		1306.8	-0.2829	1.13938	0.23714	1.33115	0.4072								1306.8	-0.185985	0.951647	0.130661	1.21185	0.187419
1308.9	-6.1987	1.5298	-7.5464	-3.6173	0.31		1308.9	-2.66479	-0.44462	-0.31139	1.92761	-0.5849								1308.9	-2.56788	-0.632353	-0.417869	1.80831	-0.804681
1311	-4.4503	0.6799	-5.9971	-5.2525	1.364		1311	-0.91418	-1.29212	1.23918	0.29428	0.469								1311	-0.817265	-1.47985	1.1327	0.174979	0.249219
1313.1	-3.5762	1.3598	-8.6459	-6.5409	3.4719		1313.1	-0.03787	-0.60982	-1.40836	-0.99226	2.5768								1313.1	0.0590445	-0.797553	-1.51484	-1.11156	2.35702
1315.2	-4.2914	2.8329	-8.1961	-5.2525	2.9139		1315.2	-0.75086	0.86568	-0.95729	0.29801	2.0187								1315.2	-0.653945	0.677947	-1.06377	0.178709	1.79892
1317.3	-4.3709	1.0198	-6.9467	-5.1039	1.426		1317.3	-0.82815	-0.94502	0.29338	0.44847	0.5307								1317.3	-0.731235	-1.13275	0.186901	0.329169	0.310919
1319.4	-2.8609	0.9632	-6.6968	-4.6579	0.31		1319.4	0.68406	-0.99922	0.54454	0.89634	-0.5854								1319.4	0.780975	-1.18695	0.438061	0.777039	-0.805181
1321.5	-5.1656	1.4731	-6.8467	-3.7164	0.434		1321.5	-1.61843	-0.48692	0.39591	1.83971	-0.4615								1321.5	-1.52152	-0.674653	0.289431	1.72041	-0.681281
1323.6	-5.5629	1.1898	-6.6968	-4.0137	-0.124		1323.6	-2.01352	-0.76783	0.54708	1.54427	-1.0196								1323.6	-1.91661	-0.955563	0.440601	1.42497	-1.23938
1325.7	-3.0993	4.4193	-6.347	-5.6489	0.248		1325.7	0.45229	2.46407	0.89814	-0.08906	-0.6477								1325.7	0.549205	2.27634	0.791661	-0.208361	-0.867481
1327.8	-3.7351	1.3598	-7.4464	-6.4418	4.5879		1327.8	-0.18131	-0.59303	-0.19999	-0.8801	3.6921								1327.8	-0.0843955	-0.780763	-0.306469	-0.999401	3.47232
1329.9	-3.9735	3.6828	-7.3465	-5.0543	0		1329.9	-0.4175	1.73237	-0.09882	0.50927	-0.89589								1329.9	-0.320585	1.54464	-0.205299	0.389969	-1.11567
1332	-0.3974	0.2266	-8.4459	-4.6579	1.054		1332	3.16081	-1.72143	-1.19695	0.90753	0.15801								1332	3.25772	-1.90916	-1.30343	0.788229	-0.0617711
1334.1	-2.9404	2.493	-6.6968	-4.2119	-0.744		1334.1	0.62002	0.54737	0.55341	1.3554	-1.64009								1334.1	0.716935	0.359637	0.446931	1.2361	-1.85987
1336.2	-5.5629	2.9462	-5.5473	-4.1624	3.2239		1336.2	-2.00027	1.00297	1.70418	1.40676	2.32771								1336.2	-1.90336	0.815237	1.5977	1.28746	2.10793
1338.3	-5.7219	1.3031	-7.2965	-4.9552	2.7279		1338.3	-2.15706	-0.63773	-0.04375	0.61583	1.83161								1338.3	-2.06015	-0.825463	-0.150229	0.496529	1.61183
1340.4	-4.4503	3.9094	-6.297	-5.4012	0.682		1340.4	-0.88325	1.97097	0.95701	0.1717	-0.21439								1340.4	-0.786335	1.78324	0.850531	0.0523993	-0.434171
1342.5	-0.0795	3.5128	-5.5473	-4.9057	-0.31		1342.5	3.48976	1.57677	1.70798	0.66906	-1.20649								1342.5	3.58667	1.38904	1.6015	0.549759	-1.42627
1344.6	-2.6225	2.6629	-6.4969	-3.8651	0.31		1344.6	0.94897	0.72927	0.75965	1.71153	-0.58659								1344.6	1.04588	0.541537	0.653171	1.59223	-0.806371
1346.7	-2.1457	3.6261	-6.347	-4.1624	0.062		1346.7	1.42798	1.69487	0.91082	1.41609	-0.83469								1346.7	1.52489	1.50714	0.804341	1.29679	-1.05447
1348.8	-0.5563	1.983	-7.6463	-7.086	1.24		1348.8	3.01959	0.05417	-0.38722	-1.50564	0.34321								1348.8	3.1165	-0.133563	-0.493699	-1.62494	0.123429
1350.9	-4.2119	2.0963	-6.8967	-5.5003	0.31		1350.9	-0.6338	0.16987	0.36365	0.08192	-0.58689								1350.9	-0.536885	-0.0178634	0.257171	-0.0373807	-0.806671
1353	-1.5099	1.3598	-6.9966	-4.311	1.736		1353	2.0704	-0.56424	0.26502	1.27309	0.83901								1353	2.16731	-0.751973	0.158541	1.15379	0.619229
1355.1	-4.1324	3.1162	-5.2475	-6.1445	1.364		1355.1	-0.54989	1.19456	2.01538	-0.55854	0.46691								1355.1	-0.452975	1.00683	1.9089	-0.677841	0.247129
1357.2	-2.702	2.493	-5.1475	-4.6083	2.5419		1357.2	0.88272	0.57376	2.11665	0.97952	1.64471								1357.2	0.979635	0.386027	2.01017	0.860219	1.42493
1359.3	-2.9404	1.1898	-7.6463	-5.9463	1.612		1359.3	0.64653	-0.72704	-0.38088	-0.35661	0.71472								1359.3	0.743445	-0.914773	-0.487359	-0.475911	0.494939
1361.4	-3.0199	2.0963	-5.8472	-4.9552	1.178		1361.4	0.56924	0.18186	1.41948	0.63635	0.28062								1361.4	0.666155	-0.00587337	1.313	0.517049	0.0608389
1363.5	-1.1921	4.7593	-7.4464	-3.8651	2.356		1363.5	2.39925	2.84726	-0.17845	1.72832	1.45852								1363.5	2.49616	2.65953	-0.284929	1.60902	1.23874
1365.6	-3.0199	3.8527	-6.9467	-4.9057	0.62		1365.6	0.57366	1.94306	0.32252	0.68958	-0.27758								1365.6	0.670575	1.75533	0.216041	0.570279	-0.497361
1367.7	-2.3841	3.4561	-6.4969	-5.4012	2.294		1367.7	1.21167	1.54886	0.77359	0.19595	1.39632								1367.7	1.30858	1.36113	0.667111	0.0766493	1.17654
1369.8	-2.7815	1.4165	-5.6973	-4.6579	1.364		1369.8	0.81648	-0.48834	1.57445	0.94112	0.46622								1369.8	0.913395	-0.676073	1.46797	0.821819	0.246439
1371.9	-2.6225	3.2295	-7.0966	-7.086	1.984		1371.9	0.97769	1.32706	0.17642	-1.48512	1.08612								1371.9	1.0746	1.13933	0.0699413	-1.60442	0.866339
1374	-3.6556	0.5099	-9.4455	-7.2346	0		1374	-0.0532	-1.39014	-2.17121	-1.63185	-0.89798								1374	0.0437145	-1.57787	-2.27769	-1.75115	-1.11776
1376.1	-4.8477	-0.3966	-7.4464	-5.8471	2.108		1376.1	-1.24309	-2.29424	-0.17085	-0.24249	1.20992								1376.1	-1.14618	-2.48197	-0.277329	-0.361791	0.990139
1378.2	-4.3709	2.5496	-8.6958	-6.64	0.372		1378.2	-0.76409	0.65436	-1.41898	-1.03352	-0.52618								1378.2	-0.667175	0.466627	-1.52546	-1.15282	-0.745961
1380.3	-3.8146	2.5496	-8.4459	-4.7075	0.496		1380.3	-0.20558	0.65675	-1.16781	0.90084	-0.40228								1380.3	-0.108665	0.469017	-1.27429	0.781539	-0.622061
1382.4	-3.0199	1.1332	-5.8972	-6.0949	1.178		1382.4	0.59133	-0.75725	1.38216	-0.48469	0.27962								1382.4	0.688245	-0.944983	1.27568	-0.603991	0.0598389
1384.5	-1.0331	1.6431	-8.0461	-5.5498	-0.434		1384.5	2.58034	-0.24495	-0.76548	0.06228	-1.33248								1384.5	2.67725	-0.432683	-0.871959	-0.0570207	-1.55226
1386.6	-2.6225	2.2663	-6.8967	-5.748	1.922		1386.6	0.99315	0.38065	0.38519	-0.13406	1.02342								1386.6	1.09006	0.192917	0.278711	-0.253361	0.803639
1388.7	-2.9404	2.0963	-8.0461	-4.8561	1.736		1388.7	0.67746	0.21305	-0.76294	0.75971	0.83733								1388.7	0.774375	0.0253166	-0.869419	0.640409	0.617549
1390.8	-3.0199	0.2266	-8.0961	-2.6758	0.186		1390.8	0.60017	-1.65425	-0.81168	2.94187	-0.71277								1390.8	0.697085	-1.84198	-0.918159	2.82257	-0.932551
1392.9	-3.4172	2.8329	-6.9966	-4.311	1.302		1392.9	0.20508	0.95445	0.28909	1.30854	0.40313								1392.9	0.301995	0.766717	0.182611	1.18924	0.183349
1395	-6.5166	3.8527	-5.6973	-4.2615	0.124		1395	-2.89211	1.97665	1.58966	1.3599	-0.77497								1395	-2.7952	1.78892	1.48318	1.2406	-0.994751
1397.1	-3.7351	3.9661	-7.6963	-4.5092	3.9679		1397.1	-0.1084	2.09245	-0.40808	1.11407	3.06883								1397.1	-0.0114855	1.90472	-0.514559	0.994769	2.84905

## Sheet: Fig4_fig_suppl2C
	Original data (P700 deltaI/I x10³)						After slope correction in Origin (baseline subtraction tool)								Zero levels						Zero levels set
time/ms	White slugs 1	White slugs 2	White slugs 3	White slugs 4	White slugs 5		time/ms	White slugs 1	White slugs 2	White slugs 3	White slugs 4	White slugs 5		White slugs 1	White slugs 2	White slugs 3	White slugs 4	White slugs 5		time/ms	White slugs 1	White slugs 2	White slugs 3	White slugs 4	White slugs 5
-198.9	0.1535	0.898	0.8426	1.1329	2.7994		-198.9	-0.00908	0.00924	-0.01336	-0.000933202	-0.02345		0.0137493	0.017023	0.0208058	0.00910738	0.0180799		-198.9	-0.0228293	-0.00778304	-0.0341658	-0.0100406	-0.0415299
-196.8	0.1371	0.8786	0.8529	1.145	2.8108		-196.8	-0.02501	-0.00988	-0.00285	0.01142	-0.01266								-196.8	-0.0387593	-0.026903	-0.0236558	0.00231262	-0.0307399
-194.7	0.1511	0.8904	0.8534	1.1288	2.8303		-194.7	-0.01054	0.0022	-0.00214	-0.00453	0.00622								-194.7	-0.0242893	-0.014823	-0.0229458	-0.0136374	-0.0118599
-192.6	0.1554	0.9163	0.8518	1.1486	2.8245		-192.6	-0.00576	0.02839	-0.00352	0.01552	-0.000187144								-192.6	-0.0195093	0.011367	-0.0243258	0.00641262	-0.018267
-190.5	0.1696	0.9048	0.8815	1.1464	2.8211		-190.5	0.00891	0.01717	0.02639	0.01357	-0.0042								-190.5	-0.00483933	0.000146957	0.00558425	0.00446262	-0.0222799
-188.4	0.1634	0.8912	0.8623	1.1324	2.832		-188.4	0.00318	0.00386	0.00741	-0.000182719	0.00609								-188.4	-0.0105693	-0.013163	-0.0133958	-0.0092901	-0.0119899
-186.3	0.1659	0.9179	0.8767	1.1637	2.8306		-186.3	0.00616	0.03084	0.02202	0.03137	0.00408								-186.3	-0.00758933	0.013817	0.00121425	0.0222626	-0.0139999
-184.2	0.1562	0.9101	0.8602	1.1527	2.8409		-184.2	-0.00307	0.02332	0.00573	0.02062	0.01377								-184.2	-0.0168193	0.00629696	-0.0150758	0.0115126	-0.00430986
-182.1	0.1857	0.8872	0.818	1.114	2.8474		-182.1	0.0269	0.000707075	-0.03625	-0.01783	0.01966								-182.1	0.0131507	-0.016316	-0.0570558	-0.0269374	0.00158014
-180	0.1774	0.8725	0.8418	1.1189	2.852		-180	0.01907	-0.01371	-0.01224	-0.01268	0.02364								-180	0.00532067	-0.030733	-0.0330458	-0.0217874	0.00556014
-177.9	0.1669	0.8746	0.8669	1.134	2.84		-177.9	0.00905	-0.01133	0.01308	0.00267	0.01103								-177.9	-0.00469933	-0.028353	-0.00772575	-0.00643738	-0.00704986
-175.8	0.143	0.8896	0.868	1.1225	2.8306		-175.8	-0.01438	0.00396	0.01439	-0.00858	0.00102								-175.8	-0.0281293	-0.013063	-0.00641575	-0.0176874	-0.0170599
-173.7	0.1642	0.8781	0.8764	1.1453	2.8566		-173.7	0.00729	-0.00726	0.023	0.01447	0.02641								-173.7	-0.00645933	-0.024283	0.00219425	0.00536262	0.00833014
-171.6	0.1734	0.8844	0.8631	1.1115	2.8366		-171.6	0.01697	-0.000673861	0.00992	-0.01908	0.0058								-171.6	0.00322067	-0.0176969	-0.0108858	-0.0281874	-0.0122799
-169.5	0.1742	0.8833	0.8894	1.1316	2.8431		-169.5	0.01824	-0.00149	0.03643	0.00127	0.01169								-169.5	0.00449067	-0.018513	0.0156242	-0.00783738	-0.00638986
-167.4	0.1489	0.8838	0.8777	1.108	2.8403		-167.4	-0.00659	-0.000706235	0.02494	-0.02208	0.00828								-167.4	-0.0203393	-0.0177293	0.00413425	-0.0311874	-0.00979986
-165.3	0.1672	0.8744	0.8223	1.1272	2.8234		-165.3	0.01218	-0.00982	-0.03024	-0.00263	-0.00923								-165.3	-0.00156933	-0.026843	-0.0510458	-0.0117374	-0.0273099
-163.2	0.1557	0.8744	0.8377	1.1335	2.8125		-163.2	0.00116	-0.00954	-0.01463	0.00392	-0.02075								-163.2	-0.0125893	-0.026563	-0.0354358	-0.00518738	-0.0388299
-161.1	0.1626	0.8547	0.8521	1.1346	2.8368		-161.1	0.00853	-0.02895	-1.36447e-05	0.00527	0.00294								-161.1	-0.00521933	-0.045973	-0.0208194	-0.00383738	-0.0151399
-159	0.1645	0.8933	0.8623	1.1321	2.8348		-159	0.0109	0.00993	0.0104	0.00302	0.000331605								-159	-0.00284933	-0.00709304	-0.0104058	-0.00608738	-0.0177483
-156.9	0.1318	0.8917	0.8464	1.1351	2.836		-156.9	-0.02132	0.00861	-0.00529	0.00627	0.000920277								-156.9	-0.0350693	-0.00841304	-0.0260958	-0.00283738	-0.0171596
-154.8	0.1677	0.8684	0.8569	1.1269	2.8646		-154.8	0.01505	-0.0144	0.00543	-0.00168	0.02891								-154.8	0.00130067	-0.031423	-0.0153758	-0.0107874	0.0108301
-152.7	0.1581	0.9114	0.8596	1.1557	2.8554		-152.7	0.00592	0.02888	0.00834	0.02737	0.0191								-152.7	-0.00782933	0.011857	-0.0124658	0.0182626	0.00102014
-150.6	0.154	0.9056	0.8699	1.1626	2.8454		-150.6	0.00229	0.02336	0.01886	0.03452	0.00849								-150.6	-0.0114593	0.00633696	-0.00194575	0.0254126	-0.00958986
-148.5	0.1841	0.9132	0.8591	1.1467	2.8371		-148.5	0.03287	0.03125	0.00827	0.01887	-0.000425035								-148.5	0.0191207	0.014227	-0.0125358	0.00976262	-0.0185049
-146.4	0.1594	0.9198	0.881	1.1373	2.86		-146.4	0.00864	0.03813	0.03038	0.00972	0.02186								-146.4	-0.00510933	0.021107	0.00957425	0.000612621	0.00378014
-144.3	0.1573	0.8794	0.8767	1.1431	2.8497		-144.3	0.00701	-0.00198	0.0263	0.01577	0.01095								-144.3	-0.00673933	-0.019003	0.00549425	0.00666262	-0.00712986
-142.2	0.1304	0.9098	0.868	1.1269	2.8494		-142.2	-0.01942	0.0287	0.01781	-0.00018059	0.01004								-142.2	-0.0331693	0.011677	-0.00299575	-0.00928797	-0.00803986
-140.1	0.1261	0.8996	0.8661	1.1486	2.8257		-140.1	-0.02324	0.01878	0.01613	0.02177	-0.01427								-140.1	-0.0369893	0.00175696	-0.00467575	0.0126626	-0.0323499
-138	0.1127	0.9095	0.8929	1.1255	2.8752		-138	-0.03617	0.02897	0.04314	-0.00108	0.03462								-138	-0.0499193	0.011947	0.0223342	-0.0101874	0.0165401
-135.9	0.1253	0.9229	0.8699	1.1305	2.8715		-135.9	-0.0231	0.04265	0.02035	0.00417	0.03031								-135.9	-0.0368493	0.025627	-0.000455751	-0.00493738	0.0122301
-133.8	0.1412	0.9371	0.8904	1.1165	2.8615		-133.8	-0.00672	0.05713	0.04107	-0.00958	0.0197								-133.8	-0.0204693	0.040107	0.0202642	-0.0186874	0.00162014
-131.7	0.1181	0.9093	0.8545	1.1214	2.8646		-131.7	-0.02935	0.02962	0.00538	-0.00443	0.02218								-131.7	-0.0430993	0.012597	-0.0154258	-0.0135374	0.00410014
-129.6	0.1779	0.8854	0.854	1.1266	2.8506		-129.6	0.03092	0.006	0.00509	0.00102	0.00757								-129.6	0.0171707	-0.011023	-0.0157158	-0.00808738	-0.0105099
-127.5	0.1578	0.9263	0.8583	1.1132	2.8606		-127.5	0.01129	0.04719	0.00961	-0.01213	0.01696								-127.5	-0.00245933	0.030167	-0.0111958	-0.0212374	-0.00111986
-125.4	0.1651	0.9111	0.8202	1.1351	2.8978		-125.4	0.01907	0.03227	-0.02828	0.01002	0.05355								-125.4	0.00532067	0.015247	-0.0490858	0.000912621	0.0354701
-123.3	0.1688	0.887	0.8772	1.108	2.8386		-123.3	0.02324	0.00845	0.02894	-0.01683	-0.00626								-123.3	0.00949067	-0.00857304	0.00813425	-0.0259374	-0.0243399
-121.2	0.183	0.8938	0.9002	1.0931	2.8677		-121.2	0.03791	0.01554	0.05215	-0.03148	0.02223								-121.2	0.0241607	-0.00148304	0.0313442	-0.0405874	0.00415014
-119.1	0.1841	0.9153	0.9107	1.1543	2.838		-119.1	0.03949	0.03732	0.06286	0.02997	-0.00808								-119.1	0.0257407	0.020297	0.0420542	0.0208626	-0.0261599
-117	0.1726	0.8983	0.8753	1.1236	2.8792		-117	0.02846	0.02061	0.02768	-0.00047943	0.03251								-117	0.0147107	0.00358696	0.00687425	-0.00958681	0.0144301
-114.9	0.1685	0.8589	0.8542	1.1384	2.8414		-114.9	0.02483	-0.01851	0.00679	0.01457	-0.00591								-114.9	0.0110807	-0.035533	-0.0140158	0.00546262	-0.0239899
-112.8	0.1763	0.8899	0.8631	1.1277	2.8374		-112.8	0.0331	0.01277	0.01591	0.00412	-0.01052								-112.8	0.0193507	-0.00425304	-0.00489575	-0.00498738	-0.0285999
-110.7	0.2058	0.8684	0.8961	1.1118	2.8537		-110.7	0.06308	-0.00844	0.04912	-0.01153	0.00517								-110.7	0.0493307	-0.025463	0.0283142	-0.0206374	-0.0129099
-108.6	0.1865	0.8634	0.8977	1.1222	2.8188		-108.6	0.04425	-0.01316	0.05093	-0.000879043	-0.03034								-108.6	0.0305007	-0.030183	0.0301242	-0.00998642	-0.0484199
-106.5	0.1868	0.861	0.901	1.1546	2.8698		-106.5	0.04502	-0.01528	0.05445	0.03177	0.02005								-106.5	0.0312707	-0.032303	0.0336442	0.0226626	0.00197014
-104.4	0.1511	0.8838	0.8996	1.1365	2.83		-104.4	0.0098	0.00781	0.05326	0.01392	-0.02036								-104.4	-0.00394933	-0.00921304	0.0324542	0.00481262	-0.0384399
-102.3	0.1793	0.8804	0.864	1.1439	2.8474		-102.3	0.03847	0.00469	0.01788	0.02157	-0.00357								-102.3	0.0247207	-0.012333	-0.00292575	0.0124626	-0.0216499
-100.2	0.1522	0.8922	0.8604	1.139	2.872		-100.2	0.01184	0.01678	0.01449	0.01692	0.02041								-100.2	-0.00190933	-0.000243043	-0.00631575	0.00781262	0.00233014
-98.1	0.1653	0.9247	0.855	1.1541	2.8729		-98.1	0.02541	0.04956	0.0093	0.03227	0.0207								-98.1	0.0116607	0.032537	-0.0115058	0.0231626	0.00262014
-96	0.1433	0.9101	0.8967	1.1623	2.8783		-96	0.00389	0.03524	0.05122	0.04072	0.02549								-96	-0.00985933	0.018217	0.0304142	0.0316126	0.00741014
-93.9	0.143	0.9142	0.8658	1.1261	2.9064		-93.9	0.00406	0.03963	0.02053	0.00477	0.05298								-93.9	-0.00968933	0.022607	-0.000275751	-0.00433738	0.0349001
-91.8	0.1404	0.9148	0.8534	1.1417	2.8609		-91.8	0.00193	0.04051	0.00834	0.02062	0.00687								-91.8	-0.0118193	0.023487	-0.0124658	0.0115126	-0.0112099
-89.7	0.1578	0.9213	0.8929	1.1217	2.8944		-89.7	0.01981	0.04729	0.04806	0.000871828	0.03976								-89.7	0.00606067	0.030267	0.0272542	-0.00823555	0.0216801
-87.6	0.1406	0.9003	0.8707	1.1096	2.8912		-87.6	0.00308	0.02658	0.02607	-0.01098	0.03595								-87.6	-0.0106693	0.00955696	0.00526425	-0.0200874	0.0178701
-85.5	0.1651	0.8941	0.8623	1.1203	2.8769		-85.5	0.02805	0.02066	0.01789	-2.79786e-05	0.02104								-85.5	0.0143007	0.00363696	-0.00291575	-0.00913536	0.00296014
-83.4	0.1489	0.8909	0.8791	1.1192	2.8801		-83.4	0.01232	0.01775	0.0349	-0.000877882	0.02362								-83.4	-0.00142933	0.000726957	0.0140942	-0.00998526	0.00554014
-81.3	0.164	0.8862	0.855	1.1148	2.8881		-81.3	0.0279	0.01333	0.01101	-0.00503	0.03101								-81.3	0.0141507	-0.00369304	-0.00979575	-0.0141374	0.0129301
-79.2	0.1484	0.8954	0.838	1.0972	2.8998		-79.2	0.01277	0.02281	-0.00577	-0.02238	0.0421								-79.2	-0.000979328	0.00578696	-0.0265758	-0.0314874	0.0240201
-77.1	0.1452	0.8996	0.861	1.1165	2.8892		-77.1	0.01004	0.0273	0.01744	-0.00283	0.03089								-77.1	-0.00370933	0.010277	-0.00336575	-0.0119374	0.0128101
-75	0.1667	0.8891	0.9188	1.1272	2.8852		-75	0.03201	0.01708	0.07546	0.00812	0.02628								-75	0.0182607	5.69568e-05	0.0546542	-0.000987379	0.00820014
-72.9	0.1409	0.8807	0.8953	1.1285	2.8698		-72.9	0.00669	0.00897	0.05217	0.00967	0.01027								-72.9	-0.00705933	-0.00805304	0.0313642	0.000562621	-0.00780986
-70.8	0.1436	0.8715	0.8631	1.1365	2.9018		-70.8	0.00986	4.91561e-05	0.02018	0.01792	0.04166								-70.8	-0.00388933	-0.0169739	-0.000625751	0.00881262	0.0235801
-68.7	0.131	0.8705	0.8872	1.1151	2.8889		-68.7	-0.00227	-0.000667031	0.0445	-0.00323	0.02814								-68.7	-0.0160193	-0.0176901	0.0236942	-0.0123374	0.0100601
-66.6	0.1323	0.8455	0.8694	1.1258	2.9087		-66.6	-0.000494031	-0.02538	0.02691	0.00772	0.04733								-66.6	-0.0142434	-0.042403	0.00610425	-0.00138738	0.0292501
-64.5	0.121	0.8817	0.8869	1.1277	2.8964		-64.5	-0.01132	0.0111	0.04462	0.00987	0.03442								-64.5	-0.0250693	-0.00592304	0.0238142	0.000762621	0.0163401
-62.4	0.1208	0.8864	0.8818	1.1283	2.9089		-62.4	-0.01105	0.01608	0.03974	0.01072	0.04631								-62.4	-0.0247993	-0.000943043	0.0189342	0.00161262	0.0282301
-60.3	0.1463	0.8885	0.8664	1.131	2.9218		-60.3	0.01492	0.01847	0.02455	0.01367	0.0586								-60.3	0.00117067	0.00144696	0.00374425	0.00456262	0.0405201
-58.2	0.1495	0.9011	0.8683	1.1096	2.9192		-58.2	0.0186	0.03135	0.02667	-0.00748	0.05539								-58.2	0.00485067	0.014327	0.00586425	-0.0165874	0.0373101
-56.1	0.1567	0.882	0.8661	1.1145	2.927		-56.1	0.02627	0.01254	0.02468	-0.00233	0.06258								-56.1	0.0125207	-0.00448304	0.00387425	-0.0114374	0.0445001
-54	0.1621	0.8828	0.8634	1.1148	2.9599		-54	0.03214	0.01362	0.02219	-0.00178	0.09487								-54	0.0183907	-0.00340304	0.00138425	-0.0108874	0.0767901
-51.9	0.1734	0.9059	0.8702	1.1357	2.913		-51.9	0.04392	0.037	0.02921	0.01937	0.04735								-51.9	0.0301707	0.019977	0.00840425	0.0102626	0.0292701
-49.8	0.1653	0.8778	0.8588	1.1294	2.8652		-49.8	0.03629	0.00919	0.01802	0.01332	-0.00106								-49.8	0.0225407	-0.00783304	-0.00278575	0.00421262	-0.0191399
-47.7	0.1769	0.8844	0.8723	1.1291	2.8726		-47.7	0.04836	0.01607	0.03174	0.01327	0.00573								-47.7	0.0346107	-0.000953043	0.0109342	0.00416262	-0.0123499
-45.6	0.142	0.888	0.8331	1.1414	2.8801		-45.6	0.01393	0.01995	-0.00725	0.02582	0.01262								-45.6	0.000180672	0.00292696	-0.0280558	0.0167126	-0.00545986
-43.5	0.1433	0.8888	0.8637	1.125	2.9061		-43.5	0.01571	0.02104	0.02356	0.00967	0.03801								-43.5	0.00196067	0.00401696	0.00275425	0.000562621	0.0199301
-41.4	0.1444	0.898	0.8429	1.1192	2.8746		-41.4	0.01728	0.03052	0.00298	0.00412	0.0059								-41.4	0.00353067	0.013497	-0.0178258	-0.00498738	-0.0121799
-39.3	0.1573	0.8938	0.8748	1.1431	2.8938		-39.3	0.03065	0.02661	0.03509	0.02827	0.02449								-39.3	0.0169007	0.00958696	0.0142842	0.0191626	0.00641014
-37.2	0.1532	0.909	0.8794	1.0816	2.8709		-37.2	0.02703	0.04209	0.03991	-0.03298	0.000974573								-37.2	0.0132807	0.025067	0.0191042	-0.0420874	-0.0171053
-35.1	0.164	0.9137	0.8672	1.1214	2.8849		-35.1	0.0383	0.04707	0.02792	0.00707	0.01436								-35.1	0.0245507	0.030047	0.00711425	-0.00203738	-0.00371986
-33	0.1385	0.9093	0.8748	1.1447	2.8875		-33	0.01327	0.04296	0.03573	0.03062	0.01635								-33	-0.000479328	0.025937	0.0149242	0.0215126	-0.00172986
-30.9	0.1688	0.8899	0.8788	1.1269	2.8901		-30.9	0.04404	0.02384	0.03995	0.01307	0.01834								-30.9	0.0302907	0.00681696	0.0191442	0.00396262	0.000260145
-28.8	0.1299	0.8807	0.8869	1.1472	2.8918		-28.8	0.00562	0.01493	0.04826	0.03362	0.01943								-28.8	-0.00812933	-0.00209304	0.0274542	0.0245126	0.00135014
-26.7	0.1143	0.8807	0.871	1.1049	2.917		-26.7	-0.00951	0.01521	0.03257	-0.00843	0.04402								-26.7	-0.0232593	-0.00181304	0.0117642	-0.0175374	0.0259401
-24.6	0.1337	0.8631	0.8445	1.1368	2.9353		-24.6	0.01036	-0.00211	0.00629	0.02372	0.06171								-24.6	-0.00338933	-0.019133	-0.0145158	0.0146126	0.0436301
-22.5	0.1492	0.8586	0.8221	1.153	2.9084		-22.5	0.02633	-0.00632	-0.0159	0.04017	0.0342								-22.5	0.0125807	-0.023343	-0.0367058	0.0310626	0.0161201
-20.4	0.1712	0.8746	0.8572	1.1576	2.919		-20.4	0.04881	0.00996	0.01942	0.04503	0.04418								-20.4	0.0350607	-0.00706304	-0.00138575	0.0359226	0.0261001
-18.3	0.1449	0.9085	0.8426	1.1428	2.9007		-18.3	0.02298	0.04414	0.00503	0.03048	0.02527								-18.3	0.00923067	0.027117	-0.0157758	0.0213726	0.00719014
-16.2	0.1583	0.892	0.868	1.1327	2.9055		-16.2	0.03685	0.02793	0.03064	0.02063	0.02946								-16.2	0.0231007	0.010907	0.00983425	0.0115226	0.0113801
-14.1	0.135	0.8998	0.858	1.1305	2.9101		-14.1	0.01403	0.03601	0.02086	0.01868	0.03345								-14.1	0.000280672	0.018987	5.42489e-05	0.00957262	0.0153701
-12	0.1575	0.8778	0.8486	1.1357	2.9181		-12	0.037	0.0143	0.01167	0.02413	0.04084								-12	0.0232507	-0.00272304	-0.00913575	0.0150226	0.0227601
-9.9	0.1261	0.8996	0.8656	1.1653	2.8818		-9.9	0.00607	0.03638	0.02889	0.05398	0.00393								-9.9	-0.00767933	0.019357	0.00808425	0.0448726	-0.0141499
-7.8	0.1441	0.909	0.8675	1.1571	2.866		-7.8	0.02454	0.04606	0.031	0.04603	-0.01248								-7.8	0.0107907	0.029037	0.0101942	0.0369226	-0.0305599
-5.7	0.15	0.8927	0.8718	1.1354	2.8772		-5.7	0.03092	0.03005	0.03551	0.02458	-0.0019								-5.7	0.0171707	0.013027	0.0147042	0.0154726	-0.0199799
-3.6	0.1194	0.8972	0.8821	1.1236	2.9001		-3.6	0.000790155	0.03483	0.04603	0.01303	0.02039								-3.6	-0.0129592	0.017807	0.0252242	0.00392262	0.00231014
-1.5	0.1288	0.9077	0.8591	1.1316	2.8798		-1.5	0.01066	0.04561	0.02324	0.02128	-0.000518006								-1.5	-0.00308933	0.028587	0.00243425	0.0121726	-0.0185979
0.6	0.1425	0.8972	0.8191	1.1198	2.8766		0.6	0.02484	0.0354	-0.01654	0.00973	-0.00443								0.6	0.0110907	0.018377	-0.0373458	0.000622621	-0.0225099
2.7	0.1259	0.8626	0.8421	1.122	2.8534		2.7	0.00871	0.00108	0.00667	0.01218	-0.02835								2.7	-0.00503933	-0.015943	-0.0141358	0.00307262	-0.0464299
4.8	0.1288	0.8592	0.8353	1.1321	2.8709		4.8	0.01208	-0.0022	-4.05435e-05	0.02253	-0.01157								4.8	-0.00166933	-0.019223	-0.0208463	0.0134226	-0.0296499
6.9	0.0843	0.8458	0.8088	1.1093	2.8863		6.9	-0.03195	-0.01566	-0.02657	-2.37223e-05	0.00311								6.9	-0.0456993	-0.032683	-0.0473758	-0.0091311	-0.0149699
9	0.0878	0.876	0.8413	1.134	2.9353		9	-0.02797	0.01448	0.00589	0.02493	0.05139								9	-0.0417193	-0.00254304	-0.0149158	0.0158226	0.0333101
11.1	0.1111	0.8335	0.8402	1.117	2.919		11.1	-0.0042	-0.02808	0.00476	0.00818	0.03436								11.1	-0.0179493	-0.045103	-0.0160458	-0.000927379	0.0162801
13.2	0.1312	0.8678	0.8375	1.1255	2.8514		13.2	0.01637	0.00617	0.00203	0.01693	-0.03396								13.2	0.00262067	-0.010853	-0.0187758	0.00782262	-0.0520399
15.3	0.1232	0.8628	0.8367	1.0931	2.8577		15.3	0.00885	0.00111	0.00119	-0.01522	-0.02838								15.3	-0.00489933	-0.015913	-0.0196158	-0.0243274	-0.0464599
17.4	0.1111	0.8568	0.855	1.1077	2.8932		17.4	-0.00278	-0.00495	0.01946	-0.000373239	0.0064								17.4	-0.0165293	-0.021973	-0.00134575	-0.00948062	-0.0116799
19.5	0.1063	0.8642	0.8345	1.1261	2.8958		19.5	-0.00738	0.00239	-0.00107	0.01828	0.00828								19.5	-0.0211293	-0.014633	-0.0218758	0.00917262	-0.00979986
21.6	0.109	0.8408	0.831	1.1423	2.8852		21.6	-0.00474	-0.02106	-0.00461	0.03473	-0.00304								21.6	-0.0184893	-0.038083	-0.0254158	0.0256226	-0.0211199
23.7	0.0918	0.86	0.818	1.1263	2.8818		23.7	-0.022	-0.00192	-0.01764	0.01898	-0.00716								23.7	-0.0357493	-0.018943	-0.0384458	0.00987262	-0.0252399
25.8	0.1417	0.8655	0.8231	1.1214	2.8849		25.8	0.02784	0.00352	-0.01258	0.01433	-0.00478								25.8	0.0140907	-0.013503	-0.0333858	0.00522262	-0.0228599
27.9	0.1189	0.8524	0.8237	1.1225	2.9021		27.9	0.00499	-0.00964	-0.01201	0.01568	0.0117								27.9	-0.00875933	-0.026663	-0.0328158	0.00657262	-0.00637986
30	0.1087	0.834	0.8013	1.1266	2.9127		30	-0.00527	-0.02809	-0.03444	0.02003	0.02158								30	-0.0190193	-0.045113	-0.0552458	0.0109226	0.00350014
32.1	0.1184	0.8607	0.8304	1.1291	2.9064		32.1	0.00437	-0.00145	-0.00538	0.02243	0.01456								32.1	-0.00937933	-0.018473	-0.0261858	0.0133226	-0.00351986
34.2	0.1149	0.8395	0.8496	1.1332	2.8775		34.2	0.000814264	-0.02271	0.01379	0.02643	-0.01506								34.2	-0.0129351	-0.039733	-0.00701575	0.0173226	-0.0331399
36.3	0.1025	0.861	0.8272	1.1165	2.9078		36.3	-0.01164	-0.00127	-0.00864	0.00964	0.01452								36.3	-0.0253893	-0.018293	-0.0294458	0.000532621	-0.00355986
38.4	0.1082	0.8573	0.8159	1.0819	2.8835		38.4	-0.006	-0.00502	-0.01998	-0.02506	-0.0105								38.4	-0.0197493	-0.022043	-0.0407858	-0.0341674	-0.0285799
40.5	0.1076	0.8712	0.8413	1.1066	2.9167		40.5	-0.00666	0.00882	0.00539	-0.000455762	0.02198								40.5	-0.0204093	-0.00820304	-0.0154158	-0.00956314	0.00390014
42.6	0.0802	0.8432	0.8421	1.1294	2.8989		42.6	-0.03412	-0.01924	0.00616	0.02225	0.00345								42.6	-0.0478693	-0.036263	-0.0146458	0.0131426	-0.0146299
44.7	0.1087	0.8371	0.8534	1.1349	2.9041		44.7	-0.00567	-0.0254	0.01742	0.02765	0.00793								44.7	-0.0194193	-0.042423	-0.00338575	0.0185426	-0.0101499
46.8	0.1192	0.8623	0.8513	1.1414	2.8821		46.8	0.00477	-0.000254537	0.01529	0.03405	-0.01479								46.8	-0.00897933	-0.0172776	-0.00551575	0.0249426	-0.0328699
48.9	0.1111	0.86	0.8383	1.1324	2.9124		48.9	-0.00339	-0.00261	0.00226	0.02496	0.01479								48.9	-0.0171393	-0.019633	-0.0185458	0.0158526	-0.00328986
51	0.1294	0.8621	0.8434	1.1258	2.9067		51	0.01485	-0.000569583	0.00732	0.01826	0.00837								51	0.00110067	-0.0175926	-0.0134858	0.00915262	-0.00970986
53.1	0.1194	0.8647	0.8483	1.067	2.8872		53.1	0.0048	0.00197	0.01219	-0.04064	-0.01185								53.1	-0.00894933	-0.015053	-0.00861575	-0.0497474	-0.0299299
55.2	0.132	0.8807	0.8272	1.0898	2.8492		55.2	0.01734	0.01792	-0.00894	-0.01793	-0.05057								55.2	0.00359067	0.000896957	-0.0297458	-0.0270374	-0.0686499
57.3	0.1146	0.8906	0.8507	1.0764	2.8675		57.3	-0.000118377	0.02776	0.01452	-0.03143	-0.03299								57.3	-0.0138677	0.010737	-0.00628575	-0.0405374	-0.0510699
59.4	0.1385	0.8809	0.8613	1.1096	2.864		59.4	0.02372	0.018	0.02509	0.00167	-0.03721								59.4	0.00997067	0.000976957	0.00428425	-0.00743738	-0.0552899
61.5	0.1358	0.8733	0.8404	1.0756	2.876		61.5	0.02097	0.01034	0.00416	-0.03242	-0.02593								61.5	0.00722067	-0.00668304	-0.0166458	-0.0415274	-0.0440099
63.6	0.1264	0.8681	0.8275	1.0893	2.9035		63.6	0.01151	0.00509	-0.00878	-0.01882	0.000847368								63.6	-0.00223933	-0.011933	-0.0295858	-0.0279274	-0.0172325
65.7	0.1345	0.8508	0.8645	1.097	2.9167		65.7	0.01955	-0.01227	0.02819	-0.01122	0.01333								65.7	0.00580067	-0.029293	0.00738425	-0.0203274	-0.00474986
67.8	0.1124	0.8752	0.8896	1.1036	2.8872		67.8	-0.00261	0.01207	0.05326	-0.00472	-0.01689								67.8	-0.0163593	-0.00495304	0.0324542	-0.0138274	-0.0349699
69.9	0.1082	0.8773	0.8648	1.108	2.8958		69.9	-0.00686	0.01411	0.02842	-0.000412397	-0.00901								69.9	-0.0206093	-0.00291304	0.00761425	-0.00951978	-0.0270899
72	0.1149	0.8324	0.8518	1.0761	2.8843		72	-0.000220967	-0.03084	0.01539	-0.03241	-0.02124								72	-0.0139703	-0.047863	-0.00541575	-0.0415174	-0.0393199
74.1	0.106	0.8665	0.8631	1.0627	2.8984		74.1	-0.00918	0.0032	0.02666	-0.04591	-0.00786								74.1	-0.0229293	-0.013823	0.00585425	-0.0550174	-0.0259399
76.2	0.1224	0.8626	0.8402	1.0764	2.9152		76.2	0.00716	-0.000759859	0.00372	-0.0323	0.00822								76.2	-0.00658933	-0.0177829	-0.0170858	-0.0414074	-0.00985986
78.3	0.1063	0.8329	0.8683	1.0555	2.9007		78.3	-0.00899	-0.03052	0.03179	-0.0533	-0.007								78.3	-0.0227393	-0.047543	0.0109842	-0.0624074	-0.0250799
80.4	0.1218	0.856	0.8596	1.0868	2.8798		80.4	0.00645	-0.00747	0.02305	-0.0221	-0.02862								80.4	-0.00729933	-0.024493	0.00224425	-0.0312074	-0.0466999
82.5	0.109	0.8586	0.851	1.0912	2.8675		82.5	-0.00641	-0.00493	0.01442	-0.01779	-0.04164								82.5	-0.0201593	-0.021953	-0.00638575	-0.0268974	-0.0597199
84.6	0.1108	0.8534	0.8599	1.0876	2.8629		84.6	-0.00467	-0.01019	0.02329	-0.02149	-0.04696								84.6	-0.0184193	-0.027213	0.00248425	-0.0305974	-0.0650399
86.7	0.1226	0.8361	0.8656	1.0745	2.9038		86.7	0.00708	-0.02755	0.02895	-0.03469	-0.00678								86.7	-0.00666933	-0.044573	0.00814425	-0.0437974	-0.0248599
88.8	0.1473	0.813	0.8704	1.1052	2.8989		88.8	0.03172	-0.0507	0.03372	-0.00408	-0.0124								88.8	0.0179707	-0.067723	0.0129142	-0.0131874	-0.0304799
90.9	0.1347	0.8468	0.864	1.0896	2.8566		90.9	0.01906	-0.01696	0.02729	-0.01978	-0.05542								90.9	0.00531067	-0.033983	0.00648425	-0.0288874	-0.0734999
93	0.1618	0.8335	0.8556	1.0907	2.8749		93	0.0461	-0.03032	0.01885	-0.01878	-0.03784								93	0.0323507	-0.047343	-0.00195575	-0.0278874	-0.0559199
95.1	0.1763	0.8644	0.8429	1.1025	2.8969		95.1	0.06055	0.000522433	0.00612	-0.00708	-0.01656								95.1	0.0468007	-0.0165006	-0.0146858	-0.0161874	-0.0346399
97.2	0.1554	0.8222	0.8513	1.0838	2.9095		97.2	0.03959	-0.04174	0.01449	-0.02587	-0.00468								97.2	0.0258407	-0.058763	-0.00631575	-0.0349774	-0.0227599
99.3	0.1369	0.8518	0.8477	1.1132	2.9084		99.3	0.02103	-0.01219	0.01085	0.00343	-0.0065								99.3	0.00728067	-0.029213	-0.00995575	-0.00567738	-0.0245799
101.4	0.1369	0.8592	0.828	1.0994	2.9264		101.4	0.02097	-0.00485	-0.00888	-0.01047	0.01077								101.4	0.00722067	-0.021873	-0.0296858	-0.0195774	-0.00730986
103.5	0.1036	0.84	0.831	1.1014	2.9321		103.5	-0.01238	-0.02411	-0.00591	-0.00856	0.01575								103.5	-0.0261293	-0.041133	-0.0267158	-0.0176674	-0.00232986
105.6	0.0902	0.8337	0.814	1.1214	2.9218		105.6	-0.02584	-0.03047	-0.02295	0.01134	0.00473								105.6	-0.0395893	-0.047493	-0.0437558	0.00223262	-0.0133499
107.7	0.109	0.8615	0.8453	1.1008	2.9384		107.7	-0.0071	-0.00272	0.00832	-0.00936	0.02061								107.7	-0.0208493	-0.019743	-0.0124858	-0.0184674	0.00253014
109.8	0.1116	0.8476	0.8418	1.0964	2.9667		109.8	-0.00456	-0.01668	0.00479	-0.01385	0.04819								109.8	-0.0183093	-0.033703	-0.0160158	-0.0229574	0.0301101
111.9	0.1065	0.856	0.8369	1.1052	2.9347		111.9	-0.00971	-0.00834	-0.000146958	-0.00515	0.01547								111.9	-0.0234593	-0.025363	-0.0209527	-0.0142574	-0.00260986
114	0.1055	0.8539	0.8353	1.1145	2.9238		114	-0.01077	-0.0105	-0.00178	0.00405	0.00385								114	-0.0245193	-0.027523	-0.0225858	-0.00505738	-0.0142299
116.1	0.128	0.8972	0.8502	1.1294	2.921		116.1	0.01167	0.03275	0.01309	0.01886	0.000329861								116.1	-0.00207933	0.015727	-0.00771575	0.00975262	-0.01775
118.2	0.1347	0.8872	0.841	1.0997	2.9224		118.2	0.01831	0.02269	0.00385	-0.01094	0.00101								118.2	0.00456067	0.00566696	-0.0169558	-0.0200474	-0.0170699
120.3	0.1012	0.8841	0.8453	1.078	2.9089		120.3	-0.01524	0.01953	0.00812	-0.03274	-0.01321								120.3	-0.0289893	0.00250696	-0.0126858	-0.0418474	-0.0312899
122.4	0.1071	0.8678	0.8377	1.1195	2.9172		122.4	-0.0094	0.00317	0.000485747	0.00867	-0.00563								122.4	-0.0231493	-0.013853	-0.02032	-0.000437379	-0.0237099
124.5	0.1065	0.8885	0.8167	1.0951	2.913		124.5	-0.01006	0.02382	-0.02055	-0.01583	-0.01055								124.5	-0.0238093	0.00679696	-0.0413558	-0.0249374	-0.0286299
126.6	0.1189	0.8689	0.8353	1.0997	2.9264		126.6	0.00228	0.00416	-0.00198	-0.01133	0.00213								126.6	-0.0114693	-0.012863	-0.0227858	-0.0204374	-0.0159499
128.7	0.0937	0.8455	0.8402	1.0989	2.9152		128.7	-0.02297	-0.0193	0.00289	-0.01223	-0.00979								128.7	-0.0367193	-0.036323	-0.0179158	-0.0213374	-0.0278699
130.8	0.1138	0.8634	0.8486	1.1055	2.9112		130.8	-0.00293	-0.00146	0.01125	-0.00572	-0.01452								130.8	-0.0166793	-0.018483	-0.00955575	-0.0148274	-0.0325999
132.9	0.1023	0.8537	0.8345	1.114	2.9519		132.9	-0.01449	-0.01121	-0.00288	0.00268	0.02546								132.9	-0.0282393	-0.028233	-0.0236858	-0.00642738	0.00738014
135	0.1165	0.8579	0.8313	1.0926	2.941		135	-0.00034635	-0.00707	-0.00612	-0.01882	0.01384								135	-0.0140957	-0.024093	-0.0269258	-0.0279274	-0.00423986
137.1	0.0915	0.8416	0.8272	1.1236	2.9533		137.1	-0.0254	-0.02343	-0.01025	0.01209	0.02542								137.1	-0.0391493	-0.040453	-0.0310558	0.00298262	0.00734014
139.2	0.1065	0.8712	0.8383	1.1176	2.9662		139.2	-0.01046	0.00611	0.000818074	0.00599	0.0376								139.2	-0.0242093	-0.010913	-0.0199877	-0.00311738	0.0195201
141.3	0.0819	0.876	0.8304	1.1184	2.957		141.3	-0.03512	0.01086	-0.00712	0.00669	0.02768								141.3	-0.0488693	-0.00616304	-0.0279258	-0.00241738	0.00960014
143.4	0.0529	0.8828	0.8245	1.1368	2.923		143.4	-0.06418	0.0176	-0.01305	0.025	-0.00704								143.4	-0.0779293	0.000576957	-0.0338558	0.0158926	-0.0251199
145.5	0.0883	0.8817	0.8315	1.1346	2.9556		145.5	-0.02883	0.01644	-0.00608	0.0227	0.02484								145.5	-0.0425793	-0.000583043	-0.0268858	0.0135926	0.00676014
147.6	0.0835	0.8872	0.8348	1.0893	2.9713		147.6	-0.03369	0.02188	-0.00282	-0.0227	0.03982								147.6	-0.0474393	0.00485696	-0.0236258	-0.0318074	0.0217401
149.7	0.1025	0.8728	0.8186	1.1294	2.9622		149.7	-0.01475	0.00743	-0.01905	0.01731	0.03								149.7	-0.0284993	-0.00959304	-0.0398558	0.00820262	0.0119201
151.8	0.0751	0.8416	0.8242	1.1299	2.9753		151.8	-0.04221	-0.02383	-0.01348	0.01771	0.04238								151.8	-0.0559593	-0.040853	-0.0342858	0.00860262	0.0243001
153.9	0.077	0.8437	0.8245	1.1469	2.955		153.9	-0.04036	-0.02179	-0.01322	0.03461	0.02136								153.9	-0.0541093	-0.038813	-0.0340258	0.0255026	0.00328014
156	0.1012	0.8269	0.8564	1.1486	2.9559		156	-0.01622	-0.03865	0.01865	0.03621	0.02154								156	-0.0299693	-0.055673	-0.00215575	0.0271026	0.00346014
158.1	0.1111	0.824	0.815	1.1412	2.9184		158.1	-0.00638	-0.0416	-0.02278	0.02872	-0.01668								158.1	-0.0201293	-0.058623	-0.0435858	0.0196126	-0.0347599
160.2	0.1184	0.8356	0.8342	1.1505	2.9419		160.2	0.000863496	-0.03006	-0.00362	0.03792	0.0061								160.2	-0.0128858	-0.047083	-0.0244258	0.0288126	-0.0119799
162.3	0.087	0.8723	0.7967	1.159	2.9639		162.3	-0.03059	0.00658	-0.04115	0.04632	0.02737								162.3	-0.0443393	-0.010443	-0.0619558	0.0372126	0.00929014
164.4	0.0759	0.8371	0.8126	1.1332	2.9902		164.4	-0.04175	-0.02868	-0.02528	0.02043	0.05295								164.4	-0.0554993	-0.045703	-0.0460858	0.0113226	0.0348701
166.5	0.0776	0.8248	0.8153	1.1365	2.9736		166.5	-0.04011	-0.04103	-0.02262	0.02363	0.03563								166.5	-0.0538593	-0.058053	-0.0434258	0.0145226	0.0175501
168.6	0.1052	0.8497	0.8096	1.1225	2.9616		168.6	-0.01257	-0.01619	-0.02835	0.00953	0.02291								168.6	-0.0263193	-0.033213	-0.0491558	0.000422621	0.00483014
170.7	0.099	0.861	0.8191	1.1263	2.9788		170.7	-0.01882	-0.00495	-0.01888	0.01324	0.03939								170.7	-0.0325693	-0.021973	-0.0396858	0.00413262	0.0213101
172.8	0.0883	0.8445	0.801	1.1206	2.9793		172.8	-0.02958	-0.02151	-0.03702	0.00744	0.03917								172.8	-0.0433293	-0.038533	-0.0578258	-0.00166738	0.0210901
174.9	0.0765	0.8668	0.8234	1.1082	2.961		174.9	-0.04144	0.000736558	-0.01465	-0.00506	0.02015								174.9	-0.0551893	-0.0162865	-0.0354558	-0.0141674	0.00207014
177	0.1001	0.8319	0.8253	1.1014	2.9607		177	-0.0179	-0.03422	-0.01278	-0.01195	0.01913								177	-0.0316493	-0.051243	-0.0335858	-0.0210574	0.00105014
179.1	0.1224	0.8618	0.8369	1.1236	2.9728		179.1	0.00435	-0.00438	-0.00122	0.01015	0.03051								179.1	-0.00939933	-0.021403	-0.0220258	0.00104262	0.0124301
181.2	0.1041	0.8387	0.8067	1.15	2.9564		181.2	-0.01401	-0.02754	-0.03145	0.03645	0.01339								181.2	-0.0277593	-0.044563	-0.0522558	0.0273426	-0.00468986
183.3	0.0942	0.8883	0.8196	1.1634	2.9547		183.3	-0.02397	0.02201	-0.01858	0.04975	0.01097								183.3	-0.0377193	0.00498696	-0.0393858	0.0406426	-0.00710986
185.4	0.0878	0.8718	0.8121	1.1645	2.9493		185.4	-0.03043	0.00545	-0.02612	0.05076	0.00485								185.4	-0.0441793	-0.011573	-0.0469258	0.0416526	-0.0132299
187.5	0.0912	0.8542	0.8199	1.1662	2.9316		187.5	-0.02708	-0.01221	-0.01835	0.05236	-0.01357								187.5	-0.0408293	-0.029233	-0.0391558	0.0432526	-0.0316499
189.6	0.0848	0.8836	0.8245	1.1557	2.9404		189.6	-0.03354	0.01713	-0.01378	0.04176	-0.00549								189.6	-0.0472893	0.000106957	-0.0345858	0.0326526	-0.0235699
191.7	0.1192	0.888	0.8623	1.1346	2.9627		191.7	0.000800804	0.02148	0.02398	0.02057	0.01608								191.7	-0.0129485	0.00445696	0.00317425	0.0114626	-0.00199986
193.8	0.0843	0.8489	0.8413	1.136	2.9667		193.8	-0.03416	-0.01768	0.00295	0.02187	0.01936								193.8	-0.0479093	-0.034703	-0.0178558	0.0127626	0.00128014
195.9	0.0947	0.8594	0.8477	1.1425	2.9396		195.9	-0.02381	-0.00724	0.00931	0.02827	-0.00846								195.9	-0.0375593	-0.024263	-0.0114958	0.0191626	-0.0265399
198	0.1001	0.9017	0.8267	1.1505	2.949		198	-0.01847	0.035	-0.01172	0.03618	0.000222549								198	-0.0322193	0.017977	-0.0325258	0.0270726	-0.0178573
200.1	0.1039	0.9001	0.8375	1.1225	2.9361		200.1	-0.01473	0.03335	-0.00095224	0.00808	-0.0134								200.1	-0.0284793	0.016327	-0.021758	-0.00102738	-0.0314799
202.2	0.0856	0.9124	0.8007	1.1178	2.9436		202.2	-0.03309	0.04559	-0.03779	0.00328	-0.00662								202.2	-0.0468393	0.028567	-0.0585958	-0.00582738	-0.0246999
204.3	0.0835	0.8791	0.815	1.1047	2.9579		204.3	-0.03524	0.01223	-0.02352	-0.00991	0.00696								204.3	-0.0489893	-0.00479304	-0.0443258	-0.0190174	-0.0111199
206.4	0.0778	0.8542	0.8296	1.1192	2.9596		206.4	-0.041	-0.01273	-0.00895	0.00449	0.00794								206.4	-0.0547493	-0.029753	-0.0297558	-0.00461738	-0.0101399
208.5	0.0832	0.8602	0.8126	1.0975	2.9647		208.5	-0.03566	-0.00678	-0.02599	-0.01731	0.01232								208.5	-0.0494093	-0.023803	-0.0467958	-0.0264174	-0.00575986
210.6	0.1087	0.8524	0.8364	1.1145	2.9296		210.6	-0.01022	-0.01464	-0.00222	-0.000404865	-0.0235								210.6	-0.0239693	-0.031663	-0.0230258	-0.00951224	-0.0415799
212.7	0.1111	0.8888	0.8091	1.1206	2.9713		212.7	-0.00787	0.0217	-0.02955	0.0056	0.01748								212.7	-0.0216193	0.00467696	-0.0503558	-0.00350738	-0.000599855
214.8	0.0988	0.8872	0.8248	1.0929	2.9576		214.8	-0.02023	0.02004	-0.01389	-0.0222	0.00306								214.8	-0.0339793	0.00301696	-0.0346958	-0.0313074	-0.0150199
216.9	0.0942	0.8681	0.8286	1.0992	2.9748		216.9	-0.02489	0.000886098	-0.01012	-0.016	0.01954								216.9	-0.0386393	-0.0161369	-0.0309258	-0.0251074	0.00146014
219	0.1237	0.8802	0.8231	1.0918	2.9836		219	0.00455	0.01293	-0.01565	-0.02349	0.02762								219	-0.00919933	-0.00409304	-0.0364558	-0.0325974	0.00954014
221.1	0.0698	0.8969	0.8375	1.0676	2.9922		221.1	-0.0494	0.02957	-0.00129	-0.04779	0.03549								221.1	-0.0631493	0.012547	-0.0220958	-0.0568974	0.0174101
223.2	0.1205	0.92	0.8231	1.0838	3.0105		223.2	0.00124	0.05261	-0.01572	-0.03169	0.05307								223.2	-0.0125093	0.035587	-0.0365258	-0.0407974	0.0349901
225.3	0.0845	0.8833	0.8315	1.0975	2.9865		225.3	-0.03482	0.01586	-0.00735	-0.01808	0.02835								225.3	-0.0485693	-0.00116304	-0.0281558	-0.0271874	0.0102701
227.4	0.1006	0.8849	0.8494	1.0692	2.9596		227.4	-0.01878	0.0174	0.01051	-0.04648	0.000732746								227.4	-0.0325293	0.000376957	-0.0102958	-0.0555874	-0.0173471
229.5	0.0566	0.892	0.8383	1.0964	2.9836		229.5	-0.06283	0.02444	-0.000620667	-0.01938	0.02401								229.5	-0.0765793	0.00741696	-0.0214264	-0.0284874	0.00593014
231.6	0.0692	0.8972	0.8518	1.0956	2.9822		231.6	-0.05029	0.02958	0.01285	-0.02027	0.02189								231.6	-0.0640393	0.012557	-0.00795575	-0.0293774	0.00381014
233.7	0.0776	0.866	0.8286	1.0868	2.973		233.7	-0.04195	-0.00167	-0.01039	-0.02917	0.01197								233.7	-0.0556993	-0.018693	-0.0311958	-0.0382774	-0.00610986
235.8	0.0797	0.8539	0.7923	1.0857	2.9573		235.8	-0.03991	-0.01383	-0.04672	-0.03037	-0.00445								235.8	-0.0536593	-0.030853	-0.0675258	-0.0394774	-0.0225299
237.9	0.0904	0.8883	0.8259	1.0937	2.9499		237.9	-0.02926	0.02051	-0.01315	-0.02246	-0.01257								237.9	-0.0430093	0.00348696	-0.0339558	-0.0315674	-0.0306499
240	0.0993	0.8864	0.8515	1.0824	2.9464		240	-0.02042	0.01855	0.01241	-0.03386	-0.01679								240	-0.0341693	0.00152696	-0.00839575	-0.0429674	-0.0348699
242.1	0.1291	0.876	0.8304	1.0775	2.9404		242.1	0.00932	0.0081	-0.00872	-0.03886	-0.02351								242.1	-0.00442933	-0.00892304	-0.0295258	-0.0479674	-0.0415899
244.2	0.0996	0.8586	0.8288	1.0857	2.9416		244.2	-0.02024	-0.00936	-0.01035	-0.03076	-0.02303								244.2	-0.0339893	-0.026383	-0.0311558	-0.0398674	-0.0411099
246.3	0.1275	0.812	0.8245	1.0789	2.937		246.3	0.00761	-0.05602	-0.01469	-0.03765	-0.02835								246.3	-0.00613933	-0.073043	-0.0354958	-0.0467574	-0.0464299
248.4	0.11	0.8571	0.8091	1.0929	2.9464		248.4	-0.00995	-0.01098	-0.03012	-0.02375	-0.01967								248.4	-0.0236993	-0.028003	-0.0509258	-0.0328574	-0.0377499
250.5	0.1095	0.8943	0.8369	1.1143	2.9748		250.5	-0.01051	0.02617	-0.00236	-0.00245	0.00801								250.5	-0.0242593	0.00914696	-0.0231658	-0.0115574	-0.0100699
252.6	0.0966	0.8828	0.8356	1.0874	3.0042		252.6	-0.02347	0.01461	-0.00369	-0.02944	0.03668								252.6	-0.0372193	-0.00241304	-0.0244958	-0.0385474	0.0186001
254.7	0.0896	0.9082	0.8275	1.1016	2.9713		254.7	-0.03052	0.03995	-0.01182	-0.01534	0.00306								254.7	-0.0442693	0.022927	-0.0326258	-0.0244474	-0.0150199
256.8	0.1095	0.8673	0.7964	1.092	2.9825		256.8	-0.01068	-0.00101	-0.04296	-0.02504	0.01354								256.8	-0.0244293	-0.018033	-0.0637658	-0.0341474	-0.00453986
258.9	0.1135	0.8623	0.8194	1.1255	2.9762		258.9	-0.00674	-0.00606	-0.01999	0.00837	0.00652								258.9	-0.0204893	-0.023083	-0.0407958	-0.000737379	-0.0115599
261	0.1151	0.882	0.8156	1.1165	2.9679		261	-0.0052	0.01358	-0.02382	-0.000730525	-0.0025								261	-0.0189493	-0.00344304	-0.0446258	-0.0098379	-0.0205799
263.1	0.1197	0.8815	0.8242	1.15	2.9891		263.1	-0.000654631	0.01302	-0.01526	0.03267	0.01798								263.1	-0.014404	-0.00400304	-0.0360658	0.0235626	-9.98555e-05
265.2	0.106	0.8788	0.8234	1.1324	2.9825		265.2	-0.01441	0.01026	-0.01609	0.01498	0.01066								265.2	-0.0281593	-0.00676304	-0.0368958	0.00587262	-0.00741986
267.3	0.1065	0.8505	0.8264	1.1329	3.0117		267.3	-0.01397	-0.01809	-0.01312	0.01538	0.03914								267.3	-0.0277193	-0.035113	-0.0339258	0.00627262	0.0210601
269.4	0.1342	0.8636	0.8331	1.1582	3.0037		269.4	0.01367	-0.00505	-0.00646	0.04058	0.03042								269.4	-7.93276e-05	-0.022073	-0.0272658	0.0314726	0.0123401
271.5	0.0891	0.9166	0.8131	1.0992	2.9974		271.5	-0.03148	0.04789	-0.02649	-0.01852	0.0234								271.5	-0.0452293	0.030867	-0.0472958	-0.0276274	0.00532014
273.6	0.1624	0.8946	0.8102	1.0767	3.0277		273.6	0.04176	0.02583	-0.02942	-0.04111	0.05298								273.6	0.0280107	0.00880696	-0.0502258	-0.0502174	0.0349001
275.7	0.1425	0.8778	0.801	1.0896	3.0326		275.7	0.0218	0.00898	-0.03866	-0.02831	0.05716								275.7	0.00805067	-0.00804304	-0.0594658	-0.0374174	0.0390801
277.8	0.1251	0.8531	0.8445	1.1241	2.9974		277.8	0.00434	-0.01578	0.00481	0.00609	0.02124								277.8	-0.00940933	-0.032803	-0.0159958	-0.00301738	0.00316014
279.9	0.1347	0.8429	0.8037	1.1351	3.0137		279.9	0.01389	-0.02604	-0.03602	0.017	0.03682								279.9	0.000140672	-0.043063	-0.0568258	0.00789262	0.0187401
282	0.1441	0.8524	0.8234	1.1014	3.0017		282	0.02323	-0.0166	-0.01636	-0.0168	0.02409								282	0.00948067	-0.033623	-0.0371658	-0.0259074	0.00601014
284.1	0.1519	0.8256	0.8204	1.1151	3.0042		284.1	0.03097	-0.04345	-0.01939	-0.0032	0.02587								284.1	0.0172207	-0.060473	-0.0401958	-0.0123074	0.00779014
286.2	0.1178	0.8408	0.8226	1.0942	2.9868		286.2	-0.00319	-0.02831	-0.01722	-0.02419	0.00775								286.2	-0.0169393	-0.045333	-0.0380258	-0.0332974	-0.0103299
288.3	0.1465	0.8796	0.8031	1.0816	2.9702		288.3	0.02546	0.01043	-0.03676	-0.03689	-0.00957								288.3	0.0117107	-0.00659304	-0.0575658	-0.0459974	-0.0276499
290.4	0.1347	0.8479	0.831	1.103	2.9974		290.4	0.0136	-0.02133	-0.00889	-0.01559	0.01691								290.4	-0.000149328	-0.038353	-0.0296958	-0.0246974	-0.00116986
292.5	0.1342	0.8857	0.8342	1.1239	2.9833		292.5	0.01304	0.01642	-0.00572	0.00522	0.00209								292.5	-0.000709328	-0.000603043	-0.0265258	-0.00388738	-0.0159899
294.6	0.1272	0.8697	0.8404	1.1071	3.0002		294.6	0.00598	0.000357745	0.000442101	-0.01168	0.01827								294.6	-0.00776933	-0.0166653	-0.0203637	-0.0207874	0.000190145
296.7	0.1173	0.8427	0.8375	1.0898	2.9596		296.7	-0.00397	-0.0267	-0.00249	-0.02908	-0.02305								296.7	-0.0177193	-0.043723	-0.0232958	-0.0381874	-0.0411299
298.8	0.1108	0.8419	0.8464	1.1203	3.0065		298.8	-0.01053	-0.02756	0.00638	0.00133	0.02313								298.8	-0.0242793	-0.044583	-0.0144258	-0.00777738	0.00505014
300.9	0.0808	0.8744	0.8402	1.1187	2.9934		300.9	-0.04059	0.00489	0.000141724	-0.000371673	0.00931								300.9	-0.0543393	-0.012133	-0.020664	-0.00947905	-0.00876986
303	0.1106	0.8615	0.8275	1.1428	3.0285		303	-0.01085	-0.00807	-0.01259	0.02363	0.04369								303	-0.0245993	-0.025093	-0.0333958	0.0145226	0.0256101
305.1	0.098	0.8676	0.8477	1.111	3.0162		305.1	-0.0235	-0.00203	0.00757	-0.00827	0.03067								305.1	-0.0372493	-0.019053	-0.0132358	-0.0173774	0.0125901
307.2	0.1041	0.851	0.871	1.1123	3.012		307.2	-0.01746	-0.01869	0.03084	-0.00706	0.02575								307.2	-0.0312093	-0.035713	0.0100342	-0.0161674	0.00767014
309.3	0.0926	0.8201	0.854	1.1118	3.0334		309.3	-0.02902	-0.04964	0.01381	-0.00766	0.04643								309.3	-0.0427693	-0.066663	-0.00699575	-0.0167674	0.0283501
311.4	0.1506	0.8364	0.7983	1.1038	3.0274		311.4	0.02892	-0.0334	-0.04193	-0.01576	0.0397								311.4	0.0151707	-0.050423	-0.0627358	-0.0248674	0.0216201
313.5	0.132	0.8272	0.795	1.1285	3.0111		313.5	0.01027	-0.04266	-0.04526	0.00885	0.02268								313.5	-0.00347933	-0.059683	-0.0660658	-0.000257379	0.00460014
315.6	0.1245	0.8547	0.8026	1.1088	3.0283		315.6	0.00271	-0.01522	-0.03769	-0.01095	0.03916								315.6	-0.0110393	-0.032243	-0.0584958	-0.0200574	0.0210801
317.7	0.1299	0.8356	0.8107	1.0934	3.0517		317.7	0.00805	-0.03438	-0.02963	-0.02645	0.06184								317.7	-0.00569933	-0.051403	-0.0504358	-0.0355574	0.0437601
319.8	0.0985	0.8513	0.8264	1.1151	3.0225		319.8	-0.02341	-0.01873	-0.01396	-0.00484	0.03192								319.8	-0.0371593	-0.035753	-0.0347658	-0.0139474	0.0138401
321.9	0.098	0.8571	0.8283	1.1431	2.9985		321.9	-0.02396	-0.01299	-0.01209	0.02306	0.0072								321.9	-0.0377093	-0.030013	-0.0328958	0.0139526	-0.0108799
324	0.1412	0.8914	0.8361	1.1167	3.0157		324	0.01918	0.02125	-0.00433	-0.00344	0.02368								324	0.00543067	0.00422696	-0.0251358	-0.0125474	0.00560014
326.1	0.1355	0.8969	0.8391	1.1269	3.0131		326.1	0.01342	0.02669	-0.00136	0.00667	0.02036								326.1	-0.000329328	0.00966696	-0.0221658	-0.00243738	0.00228014
328.2	0.135	0.909	0.8413	1.075	2.9988		328.2	0.01286	0.03874	0.000806755	-0.04533	0.00534								328.2	-0.000889328	0.021717	-0.019999	-0.0544374	-0.0127399
330.3	0.1245	0.8762	0.8126	1.0723	3.0031		330.3	0.0023	0.00588	-0.02793	-0.04813	0.00892								330.3	-0.0114493	-0.011143	-0.0487358	-0.0572374	-0.00915986
332.4	0.1361	0.8859	0.8264	1.0714	3.0211		332.4	0.01385	0.01552	-0.01416	-0.04913	0.0262								332.4	0.000100672	-0.00150304	-0.0349658	-0.0582374	0.00812014
334.5	0.1149	0.8642	0.8334	1.0745	2.9942		334.5	-0.00741	-0.00624	-0.00719	-0.04612	-0.00142								334.5	-0.0211593	-0.023263	-0.0279958	-0.0552274	-0.0194999
336.6	0.0958	0.8657	0.8399	1.0874	2.9833		336.6	-0.02657	-0.00479	-0.000727081	-0.03332	-0.01304								336.6	-0.0403193	-0.021813	-0.0215328	-0.0424274	-0.0311199
338.7	0.1162	0.8248	0.8394	1.0989	3.0283		338.7	-0.00623	-0.04575	-0.00126	-0.02192	0.03124								338.7	-0.0199793	-0.062773	-0.0220658	-0.0310274	0.0131601
340.8	0.1071	0.8568	0.8313	1.1099	3.0271		340.8	-0.01538	-0.01381	-0.00939	-0.01101	0.02931								340.8	-0.0291293	-0.030833	-0.0301958	-0.0201174	0.0112301
342.9	0.1052	0.829	0.8318	1.0942	3.0014		342.9	-0.01734	-0.04167	-0.00893	-0.02681	0.00289								342.9	-0.0310893	-0.058693	-0.0297358	-0.0359174	-0.0151899
345	0.1146	0.8353	0.8331	1.1145	3.0225		345	-0.008	-0.03542	-0.00766	-0.00661	0.02327								345	-0.0217493	-0.052443	-0.0284658	-0.0157174	0.00519014
347.1	0.102	0.813	0.8464	1.0967	3.0165		347.1	-0.02066	-0.05778	0.00561	-0.0245	0.01655								347.1	-0.0344093	-0.074803	-0.0151958	-0.0336074	-0.00152986
349.2	0.1017	0.7802	0.8269	1.1126	2.9991		349.2	-0.02101	-0.09064	-0.01393	-0.0087	-0.00157								349.2	-0.0347593	-0.107663	-0.0347358	-0.0178074	-0.0196499
351.3	0.1036	0.8217	0.8437	1.1373	2.9836		351.3	-0.01917	-0.0492	0.00284	0.0159	-0.01779								351.3	-0.0329193	-0.066223	-0.0179658	0.00679262	-0.0358699
353.4	0.0878	0.8427	0.8234	1.1049	3.0451		353.4	-0.03503	-0.02825	-0.01749	-0.01659	0.04299								353.4	-0.0487793	-0.045273	-0.0382958	-0.0256974	0.0249101
355.5	0.0972	0.8332	0.8329	1.0767	3.0491		355.5	-0.02569	-0.03781	-0.00803	-0.04489	0.04627								355.5	-0.0394393	-0.054833	-0.0288358	-0.0539974	0.0281901
357.6	0.113	0.8563	0.8286	1.0931	3.0108		357.6	-0.00994	-0.01477	-0.01236	-0.02859	0.00725								357.6	-0.0236893	-0.031793	-0.0331658	-0.0376974	-0.0108299
359.7	0.0805	0.8649	0.7934	1.0967	3.0354		359.7	-0.0425	-0.00623	-0.0476	-0.02508	0.03113								359.7	-0.0562493	-0.023253	-0.0684058	-0.0341874	0.0130501
361.8	0.0896	0.8749	0.8199	1.0956	2.9982		361.8	-0.03346	0.00372	-0.02113	-0.02628	-0.00679								361.8	-0.0472093	-0.013303	-0.0419358	-0.0353874	-0.0248699
363.9	0.0888	0.8691	0.8396	1.0923	2.9899		363.9	-0.03432	-0.00214	-0.00146	-0.02968	-0.01581								363.9	-0.0480693	-0.019163	-0.0222658	-0.0387874	-0.0338899
366	0.0902	0.8781	0.8296	1.0863	3.0137		366	-0.03297	0.0068	-0.0115	-0.03578	0.00727								366	-0.0467193	-0.010223	-0.0323058	-0.0448874	-0.0108099
368.1	0.0837	0.8592	0.8375	1.0811	3.0494		368.1	-0.03953	-0.01216	-0.00363	-0.04107	0.04225								368.1	-0.0532793	-0.029183	-0.0244358	-0.0501774	0.0241701
370.2	0.0692	0.8775	0.8331	1.0805	3.024		370.2	-0.05409	0.00609	-0.00806	-0.04177	0.01613								370.2	-0.0678393	-0.010933	-0.0288658	-0.0508774	-0.00194986
372.3	0.0993	0.899	0.885	1.0764	3.0005		372.3	-0.02405	0.02753	0.0438	-0.04597	-0.0081								372.3	-0.0377993	0.010507	0.0229942	-0.0550774	-0.0261799
374.4	0.143	0.8859	0.8458	1.0846	3.0294		374.4	0.0196	0.01437	0.00457	-0.03786	0.02008								374.4	0.00585067	-0.00265304	-0.0162358	-0.0469674	0.00200014
376.5	0.1175	0.8665	0.8421	1.1014	3.0285		376.5	-0.00596	-0.00509	0.000837196	-0.02116	0.01846								376.5	-0.0197093	-0.022113	-0.0199686	-0.0302674	0.000380145
378.6	0.0878	0.8723	0.8304	1.0964	3.0223		378.6	-0.03572	0.000656824	-0.0109	-0.02626	0.01154								378.6	-0.0494693	-0.0163662	-0.0317058	-0.0353674	-0.00653986
380.7	0.087	0.8015	0.8188	1.1176	3.0331		380.7	-0.03658	-0.0702	-0.02253	-0.00515	0.02162								380.7	-0.0503293	-0.087223	-0.0433358	-0.0142574	0.00354014
382.8	0.095	0.8335	0.8021	1.1244	3.0348		382.8	-0.02863	-0.03826	-0.03926	0.00155	0.0226								382.8	-0.0423793	-0.055283	-0.0600658	-0.00755738	0.00452014
384.9	0.1141	0.8429	0.8202	1.12	3.0205		384.9	-0.00959	-0.02892	-0.0212	-0.00295	0.00758								384.9	-0.0233393	-0.045943	-0.0420058	-0.0120574	-0.0104999
387	0.1288	0.86	0.8329	1.1052	3.028		387	0.00505	-0.01187	-0.00853	-0.01784	0.01436								387	-0.00869933	-0.028893	-0.0293358	-0.0269474	-0.00371986
389.1	0.0942	0.8655	0.8069	1.1211	3.0569		389.1	-0.02961	-0.00643	-0.03456	-0.00204	0.04254								389.1	-0.0433593	-0.023453	-0.0553658	-0.0111474	0.0244601
391.2	0.0792	0.8531	0.7821	1.1327	3.0454		391.2	-0.04466	-0.01889	-0.0594	0.00946	0.03032								391.2	-0.0584093	-0.035913	-0.0802058	0.000352621	0.0122401
393.3	0.1076	0.876	0.8121	1.1285	3.0162		393.3	-0.01632	0.00395	-0.02943	0.00516	0.000397423								393.3	-0.0300693	-0.013073	-0.0502358	-0.00394738	-0.0176824
395.4	0.1307	0.844	0.7918	1.1143	3.0254		395.4	0.00672	-0.0281	-0.04976	-0.00913	0.00888								395.4	-0.00702933	-0.045123	-0.0705658	-0.0182374	-0.00919986
397.5	0.12	0.8859	0.785	1.1351	3.0446		397.5	-0.00404	0.01374	-0.0566	0.01157	0.02736								397.5	-0.0177893	-0.00328304	-0.0774058	0.00246262	0.00928014
399.6	0.1457	0.8437	0.808	1.128	3.0554		399.6	0.02161	-0.02852	-0.03363	0.00437	0.03744								399.6	0.00786067	-0.045543	-0.0544358	-0.00473738	0.0193601
401.7	0.1065	0.8329	0.7894	1.114	3.0263		401.7	-0.01765	-0.03938	-0.05226	-0.00972	0.00761								401.7	-0.0313993	-0.056403	-0.0730658	-0.0188274	-0.0104699
403.8	0.1023	0.8644	0.8007	1.1258	3.0368		403.8	-0.02191	-0.00793	-0.041	0.00198	0.01739								403.8	-0.0356593	-0.024953	-0.0618058	-0.00712738	-0.000689855
405.9	0.11	0.8369	0.8453	1.1074	3.0563		405.9	-0.01427	-0.03549	0.00357	-0.01652	0.03617								405.9	-0.0280193	-0.052513	-0.0172358	-0.0256274	0.0180901
408	0.1116	0.8642	0.8026	1.092	3.0649		408	-0.01272	-0.00825	-0.03916	-0.03201	0.04405								408	-0.0264693	-0.025273	-0.0599658	-0.0411174	0.0259701
410.1	0.1202	0.8424	0.7915	1.08	3.0718		410.1	-0.00418	-0.03011	-0.0503	-0.04411	0.05023								410.1	-0.0179293	-0.047133	-0.0711058	-0.0532174	0.0321501
412.2	0.1014	0.8503	0.8167	1.0769	3.0775		412.2	-0.02304	-0.02226	-0.02513	-0.04731	0.05521								412.2	-0.0367893	-0.039283	-0.0459358	-0.0564174	0.0371301
414.3	0.0867	0.8552	0.8234	1.0912	3.0803		414.3	-0.0378	-0.01742	-0.01847	-0.0331	0.05729								414.3	-0.0515493	-0.034443	-0.0392758	-0.0422074	0.0392101
416.4	0.117	0.8324	0.844	1.0967	3.0609		416.4	-0.00755	-0.04028	0.0021	-0.0277	0.03717								416.4	-0.0212993	-0.057303	-0.0187058	-0.0368074	0.0190901
418.5	0.1331	0.8781	0.838	1.1077	3.0597		418.5	0.00849	0.00536	-0.00393	-0.0168	0.03525								418.5	-0.00525933	-0.011663	-0.0247358	-0.0259074	0.0171701
420.6	0.1307	0.8655	0.8194	1.117	3.0589		420.6	0.00603	-0.00729	-0.02257	-0.0076	0.03373								420.6	-0.00771933	-0.024313	-0.0433758	-0.0167074	0.0156501
422.7	0.106	0.8741	0.8059	1.1288	3.0394		422.7	-0.01873	0.00125	-0.0361	0.00411	0.01351								422.7	-0.0324793	-0.015773	-0.0569058	-0.00499738	-0.00456986
424.8	0.0988	0.8775	0.8153	1.1198	3.0357		424.8	-0.02598	0.00459	-0.02673	-0.00499	0.00909								424.8	-0.0397293	-0.012433	-0.0475358	-0.0140974	-0.00898986
426.9	0.1173	0.8725	0.8013	1.0882	3.0437		426.9	-0.00754	-0.000466206	-0.04077	-0.03669	0.01637								426.9	-0.0212893	-0.0174892	-0.0615758	-0.0457974	-0.00170986
429	0.1401	0.8597	0.8075	1.0923	3.0354		429	0.0152	-0.01332	-0.0346	-0.03268	0.00735								429	0.00145067	-0.030343	-0.0554058	-0.0417874	-0.0107299
431.1	0.1084	0.85	0.775	1.1088	3.0752		431.1	-0.01656	-0.02308	-0.06713	-0.01628	0.04642								431.1	-0.0303093	-0.040103	-0.0879358	-0.0253874	0.0283401
433.2	0.0872	0.8665	0.8134	1.1014	3.0849		433.2	-0.03781	-0.00664	-0.02877	-0.02378	0.0554								433.2	-0.0515593	-0.023663	-0.0495758	-0.0328874	0.0373201
435.3	0.1167	0.8534	0.7877	1.1233	3.0677		435.3	-0.00837	-0.0198	-0.0545	-0.00197	0.03748								435.3	-0.0221193	-0.036823	-0.0753058	-0.0110774	0.0194001
437.4	0.1197	0.8566	0.7999	1.1192	3.0471		437.4	-0.00543	-0.01665	-0.04233	-0.00617	0.01616								437.4	-0.0191793	-0.033673	-0.0631358	-0.0152774	-0.00191986
439.5	0.0722	0.8872	0.7894	1.1022	3.0511		439.5	-0.05299	0.01389	-0.05287	-0.02327	0.01944								439.5	-0.0667393	-0.00313304	-0.0736758	-0.0323774	0.00136014
441.6	0.1157	0.8329	0.7888	1.1307	3.0314		441.6	-0.00954	-0.04047	-0.0535	0.00514	-0.000978683								441.6	-0.0232893	-0.057493	-0.0743058	-0.00396738	-0.0190585
443.7	0.1366	0.8589	0.7537	1.1274	3.0632		443.7	0.0113	-0.01453	-0.08863	0.00174	0.0301								443.7	-0.00244933	-0.031553	-0.109436	-0.00736738	0.0120201
445.8	0.128	0.8293	0.804	1.1176	3.0406		445.8	0.00264	-0.04418	-0.03837	-0.00816	0.00678								445.8	-0.0111093	-0.061203	-0.0591758	-0.0172674	-0.0112999
447.9	0.1157	0.7986	0.8104	1.0994	3.02		447.9	-0.00972	-0.07494	-0.032	-0.02645	-0.01454								447.9	-0.0234693	-0.091963	-0.0528058	-0.0355574	-0.0326199
450	0.1205	0.8298	0.8059	1.1	3.0403		450	-0.00497	-0.0438	-0.03653	-0.02595	0.00504								450	-0.0187193	-0.060823	-0.0573358	-0.0350574	-0.0130399
452.1	0.1049	0.8319	0.8004	1.0994	3.046		452.1	-0.02063	-0.04176	-0.04207	-0.02665	0.01002								452.1	-0.0343793	-0.058783	-0.0628758	-0.0357574	-0.00805986
454.2	0.0947	0.8327	0.7867	1.0994	3.0397		454.2	-0.03089	-0.04101	-0.0558	-0.02675	0.003								454.2	-0.0446393	-0.058033	-0.0766058	-0.0358574	-0.0150799
456.3	0.1202	0.8615	0.8007	1.1239	3.0403		456.3	-0.00545	-0.01227	-0.04183	-0.00234	0.00288								456.3	-0.0191993	-0.029293	-0.0626358	-0.0114474	-0.0151999
458.4	0.0937	0.8408	0.8161	1.1266	3.0408		458.4	-0.032	-0.03303	-0.02647	0.000260639	0.00266								458.4	-0.0457493	-0.050053	-0.0472758	-0.00884674	-0.0154199
460.5	0.1033	0.8371	0.8115	1.1299	3.0695		460.5	-0.02246	-0.03679	-0.0311	0.00346	0.03064								460.5	-0.0362093	-0.053813	-0.0519058	-0.00564738	0.0125601
462.6	0.0896	0.8474	0.7926	1.1546	3.0612		462.6	-0.03622	-0.02654	-0.05003	0.02807	0.02161								462.6	-0.0499693	-0.043563	-0.0708358	0.0189626	0.00353014
464.7	0.1036	0.8733	0.8242	1.1381	3.0486		464.7	-0.02228	-0.00070162	-0.01847	0.01147	0.00829								464.7	-0.0360293	-0.0177247	-0.0392758	0.00236262	-0.00978986
466.8	0.088	0.8702	0.8231	1.1239	3.0523		466.8	-0.03793	-0.00386	-0.0196	-0.00283	0.01127								466.8	-0.0516793	-0.020883	-0.0404058	-0.0119374	-0.00680986
468.9	0.1028	0.8497	0.8456	1.1173	3.0786		468.9	-0.02319	-0.02442	0.00286	-0.00952	0.03685								468.9	-0.0369393	-0.041443	-0.0179458	-0.0186274	0.0187701
471	0.0789	0.8678	0.8104	1.108	3.0852		471	-0.04715	-0.00637	-0.03237	-0.01892	0.04273								471	-0.0608993	-0.023393	-0.0531758	-0.0280274	0.0246501
473.1	0.0934	0.8492	0.8099	1.0934	3.0669		473.1	-0.03271	-0.02503	-0.0329	-0.03362	0.02371								473.1	-0.0464593	-0.042053	-0.0537058	-0.0427274	0.00563014
475.2	0.0972	0.8752	0.8137	1.1329	3.0677		475.2	-0.02896	0.000910765	-0.02914	0.00579	0.02379								475.2	-0.0427093	-0.0161123	-0.0499458	-0.00331738	0.00571014
477.3	0.1006	0.8817	0.7975	1.1403	3.0944		477.3	-0.02562	0.00735	-0.04537	0.01309	0.04977								477.3	-0.0393693	-0.00967304	-0.0661758	0.00398262	0.0316901
479.4	0.132	0.8725	0.8048	1.1088	3.072		479.4	0.00572	-0.0019	-0.0381	-0.01851	0.02665								479.4	-0.00802933	-0.018923	-0.0589058	-0.0276174	0.00857014
481.5	0.0929	0.8592	0.7856	1.1381	3.0821		481.5	-0.03344	-0.01526	-0.05734	0.01069	0.03603								481.5	-0.0471893	-0.032283	-0.0781458	0.00158262	0.0179501
483.6	0.0805	0.8786	0.8077	1.12	3.0706		483.6	-0.04589	0.00408	-0.03527	-0.0075	0.02381								483.6	-0.0596393	-0.012943	-0.0560758	-0.0166074	0.00573014
485.7	0.0722	0.872	0.8004	1.1148	3.0632		485.7	-0.05425	-0.00258	-0.0426	-0.0128	0.01569								485.7	-0.0679993	-0.019603	-0.0634058	-0.0219074	-0.00238986
487.8	0.102	0.8715	0.7964	1.1008	3.0772		487.8	-0.02451	-0.00313	-0.04664	-0.0269	0.02897								487.8	-0.0382593	-0.020153	-0.0674458	-0.0360074	0.0108901
489.9	0.106	0.8642	0.8202	1.0989	3.0594		489.9	-0.02057	-0.01049	-0.02287	-0.02889	0.01045								489.9	-0.0343193	-0.027513	-0.0436758	-0.0379974	-0.00762986
492	0.1216	0.8689	0.7972	1.1143	3.0829		492	-0.00502	-0.00585	-0.0459	-0.01359	0.03322								492	-0.0187693	-0.022873	-0.0667058	-0.0226974	0.0151401
494.1	0.099	0.888	0.7929	1.1195	3.0783		494.1	-0.02768	0.01319	-0.05024	-0.00849	0.0279								494.1	-0.0414293	-0.00383304	-0.0710458	-0.0175974	0.00982014
496.2	0.121	0.8888	0.8148	1.0904	3.068		496.2	-0.00574	0.01394	-0.02837	-0.03768	0.01688								496.2	-0.0194893	-0.00308304	-0.0491758	-0.0467874	-0.00119986
498.3	0.1138	0.8846	0.8086	1.0876	3.06		498.3	-0.013	0.00968	-0.0346	-0.04058	0.00816								498.3	-0.0267493	-0.00734304	-0.0554058	-0.0496874	-0.00991986
500.4	0.1269	0.8592	0.8083	1.1104	3.0966		500.4	4.64236e-05	-0.01578	-0.03494	-0.01788	0.04404								500.4	-0.0137029	-0.032803	-0.0557458	-0.0269874	0.0259601
502.5	0.106	0.8673	0.8175	1.1091	3.0818		502.5	-0.02091	-0.00774	-0.02577	-0.01927	0.02852								502.5	-0.0346593	-0.024763	-0.0465758	-0.0283774	0.0104401
504.6	0.0741	0.8489	0.8069	1.1209	3.0743		504.6	-0.05287	-0.02619	-0.0364	-0.00757	0.0203								504.6	-0.0666193	-0.043213	-0.0572058	-0.0166774	0.00222014
506.7	0.1374	0.8406	0.814	1.1099	3.0821		506.7	0.01037	-0.03455	-0.02934	-0.01867	0.02738								506.7	-0.00337933	-0.051573	-0.0501458	-0.0277774	0.00930014
508.8	0.109	0.8529	0.8431	1.1192	3.0975		508.8	-0.01808	-0.02231	-0.000270727	-0.00947	0.04206								508.8	-0.0318293	-0.039333	-0.0210765	-0.0185774	0.0239801
510.9	0.1119	0.8676	0.8018	1.1203	3.1118		510.9	-0.01524	-0.00767	-0.0416	-0.00846	0.05564								510.9	-0.0289893	-0.024693	-0.0624058	-0.0175674	0.0375601
513	0.0969	0.8531	0.8229	1.1069	3.0918		513	-0.0303	-0.02222	-0.02054	-0.02196	0.03492								513	-0.0440493	-0.039243	-0.0413458	-0.0310674	0.0168401
515.1	0.1001	0.8445	0.8248	1.0964	3.1061		515.1	-0.02716	-0.03088	-0.01867	-0.03256	0.0485								515.1	-0.0409093	-0.047903	-0.0394758	-0.0416674	0.0304201
517.2	0.0888	0.845	0.8277	1.1071	3.0858		517.2	-0.03851	-0.03044	-0.0158	-0.02195	0.02748								517.2	-0.0522593	-0.047463	-0.0366058	-0.0310574	0.00940014
519.3	0.1175	0.86	0.8564	1.072	3.0909		519.3	-0.00987	-0.0155	0.01286	-0.05715	0.03186								519.3	-0.0236193	-0.032523	-0.00794575	-0.0662574	0.0137801
521.4	0.1108	0.8526	0.8048	1.0887	3.0944		521.4	-0.01663	-0.02295	-0.03877	-0.04055	0.03463								521.4	-0.0303793	-0.039973	-0.0595758	-0.0496574	0.0165501
523.5	0.117	0.8649	0.8199	1.0865	3.1109		523.5	-0.01049	-0.01071	-0.0237	-0.04284	0.05041								523.5	-0.0242393	-0.027733	-0.0445058	-0.0519474	0.0323301
525.6	0.0894	0.8545	0.8461	1.0599	3.0772		525.6	-0.03814	-0.02117	0.00246	-0.06954	0.01599								525.6	-0.0518893	-0.038193	-0.0183458	-0.0786474	-0.00208986
527.7	0.087	0.8699	0.8342	1.1041	3.0735		527.7	-0.0406	-0.00583	-0.00947	-0.02544	0.01157								527.7	-0.0543493	-0.022853	-0.0302758	-0.0345474	-0.00650986
529.8	0.1358	0.8823	0.8377	1.0879	3.0738		529.8	0.00814	0.00652	-0.00601	-0.04173	0.01115								529.8	-0.00560933	-0.010503	-0.0268158	-0.0508374	-0.00692986
531.9	0.124	0.8631	0.8096	1.0852	3.0729		531.9	-0.00372	-0.01274	-0.03414	-0.04453	0.00953								531.9	-0.0174693	-0.029763	-0.0549458	-0.0536374	-0.00854986
534	0.0741	0.8762	0.8137	1.1173	3.0938		534	-0.05367	0.00030012	-0.03007	-0.01253	0.02971								534	-0.0674193	-0.0167229	-0.0508758	-0.0216374	0.0116301
536.1	0.0738	0.8526	0.7956	1.1016	3.0697		536.1	-0.05403	-0.02336	-0.04821	-0.02832	0.00489								536.1	-0.0677793	-0.040383	-0.0690158	-0.0374274	-0.0131899
538.2	0.0861	0.8411	0.8221	1.1129	3.0726		538.2	-0.04179	-0.03491	-0.02174	-0.01712	0.00707								538.2	-0.0555393	-0.051933	-0.0425458	-0.0262274	-0.0110099
540.3	0.1122	0.835	0.8172	1.0951	3.0746		540.3	-0.01575	-0.04107	-0.02667	-0.03502	0.00835								540.3	-0.0294993	-0.058093	-0.0474758	-0.0441274	-0.00972986
542.4	0.1033	0.8429	0.8231	1.1058	3.1147		542.4	-0.0247	-0.03323	-0.02081	-0.02442	0.04773								542.4	-0.0384493	-0.050253	-0.0416158	-0.0335274	0.0296501
544.5	0.0937	0.8573	0.808	1.1088	3.1358		544.5	-0.03436	-0.01889	-0.03594	-0.02151	0.06811								544.5	-0.0481093	-0.035913	-0.0567458	-0.0306174	0.0500301
546.6	0.0891	0.8592	0.8199	1.1189	3.1112		546.6	-0.03902	-0.01705	-0.02407	-0.01151	0.04279								546.6	-0.0527693	-0.034073	-0.0448758	-0.0206174	0.0247101
548.7	0.0794	0.856	0.8318	1.1247	3.1041		548.7	-0.04878	-0.0203	-0.01221	-0.00581	0.03497								548.7	-0.0625293	-0.037323	-0.0330158	-0.0149174	0.0168901
550.8	0.0792	0.8791	0.8167	1.1027	3.0597		550.8	-0.04903	0.00274	-0.02734	-0.0279	-0.01016								550.8	-0.0627793	-0.014283	-0.0481458	-0.0370074	-0.0282399
552.9	0.1036	0.8707	0.8188	1.1173	3.0637		552.9	-0.02469	-0.00572	-0.02527	-0.0134	-0.00688								552.9	-0.0384393	-0.022743	-0.0460758	-0.0225074	-0.0249599
555	0.066	0.8642	0.8072	1.1203	3.0835		555	-0.06235	-0.01228	-0.03691	-0.0105	0.0122								555	-0.0760993	-0.029303	-0.0577158	-0.0196074	-0.00587986
557.1	0.0727	0.8749	0.8064	1.1044	3.066		557.1	-0.05571	-0.00163	-0.03774	-0.02649	-0.00602								557.1	-0.0694593	-0.018653	-0.0585458	-0.0355974	-0.0240999
559.2	0.0631	0.8838	0.8134	1.1091	3.0961		559.2	-0.06536	0.00721	-0.03077	-0.02189	0.02336								559.2	-0.0791093	-0.00981304	-0.0515758	-0.0309974	0.00528014
561.3	0.0781	0.8387	0.8077	1.1291	3.0655		561.3	-0.05042	-0.03795	-0.03651	-0.00199	-0.00796								561.3	-0.0641693	-0.054973	-0.0573158	-0.0110974	-0.0260399
563.4	0.0671	0.8185	0.8291	1.1151	3.0683		563.4	-0.06148	-0.05821	-0.01514	-0.01608	-0.00588								563.4	-0.0752293	-0.075233	-0.0359458	-0.0251874	-0.0239599
565.5	0.0773	0.8329	0.8391	1.1414	3.0749		565.5	-0.05134	-0.04386	-0.00517	0.01012	0								565.5	-0.0650893	-0.060883	-0.0259758	0.00101262	-0.0180799
567.6	0.0784	0.8293	0.8423	1.1335	3.0823		567.6	-0.05029	-0.04752	-0.00201	0.00212	0.00684								567.6	-0.0640393	-0.064543	-0.0228158	-0.00698738	-0.0112399
569.7	0.1033	0.84	0.8421	1.0981	3.0798		569.7	-0.02545	-0.03688	-0.00224	-0.03338	0.00377								569.7	-0.0391993	-0.053903	-0.0230458	-0.0424874	-0.0143099
571.8	0.0915	0.8434	0.8437	1.0972	3.0806		571.8	-0.03731	-0.03354	-0.0006745	-0.03437	0.00401								571.8	-0.0510593	-0.050563	-0.0214803	-0.0434774	-0.0140699
573.9	0.0754	0.8497	0.844	1.0838	3.0892		573.9	-0.05347	-0.02729	-0.000407959	-0.04787	0.01204								573.9	-0.0672193	-0.044313	-0.0212137	-0.0569774	-0.00603986
576	0.0582	0.8413	0.824	1.0931	3.0841		576	-0.07072	-0.03575	-0.02044	-0.03867	0.00638								576	-0.0844693	-0.052773	-0.0412458	-0.0477774	-0.0116999
578.1	0.0502	0.8725	0.8186	1.0997	3.0623		578.1	-0.07878	-0.00461	-0.02587	-0.03216	-0.01599								578.1	-0.0925293	-0.021633	-0.0466758	-0.0412674	-0.0340699
580.2	0.0912	0.8757	0.7926	1.0898	3.0872		580.2	-0.03784	-0.00147	-0.05191	-0.04216	0.00835								580.2	-0.0515893	-0.018493	-0.0727158	-0.0512674	-0.00972986
582.3	0.0843	0.8715	0.8296	1.0918	3.1032		582.3	-0.0448	-0.00572	-0.01494	-0.04026	0.02378								582.3	-0.0585493	-0.022743	-0.0357458	-0.0493674	0.00570014
584.4	0.0781	0.8584	0.828	1.0923	3.0886		584.4	-0.05105	-0.01888	-0.01658	-0.03985	0.00862								584.4	-0.0647993	-0.035903	-0.0373858	-0.0489574	-0.00945986
586.5	0.0974	0.8744	0.8145	1.0832	3.0649		586.5	-0.03181	-0.00294	-0.03011	-0.04905	-0.01564								586.5	-0.0455593	-0.019963	-0.0509158	-0.0581574	-0.0337199
588.6	0.0996	0.8817	0.8237	1.0879	3.0878		588.6	-0.02967	0.0043	-0.02094	-0.04445	0.00669								588.6	-0.0434193	-0.012723	-0.0417458	-0.0535574	-0.0113899
590.7	0.1057	0.883	0.8121	1.0865	3.0821		590.7	-0.02363	0.00555	-0.03258	-0.04594	0.000427273								590.7	-0.0373793	-0.011473	-0.0533858	-0.0550474	-0.0176526
592.8	0.1143	0.8691	0.818	1.0772	3.0589		592.8	-0.01508	-0.00841	-0.02671	-0.05534	-0.02334								592.8	-0.0288293	-0.025433	-0.0475158	-0.0644474	-0.0414199
594.9	0.0754	0.8943	0.8553	1.0632	3.0629		594.9	-0.05404	0.01673	0.01056	-0.06944	-0.0199								594.9	-0.0677893	-0.000293043	-0.0102458	-0.0785474	-0.0379799
597	0.0735	0.8778	0.8261	1.0756	3.0938		597	-0.056	0.000174429	-0.01868	-0.05713	0.01043								597	-0.0697493	-0.0168486	-0.0394858	-0.0662374	-0.00764986
599.1	0.0781	0.9009	0.8186	1.1088	3.0672		599.1	-0.05146	0.02322	-0.02621	-0.02403	-0.01673								599.1	-0.0652093	0.00619696	-0.0470158	-0.0331374	-0.0348099
601.2	0.0682	0.8938	0.8302	1.1011	3.0778		601.2	-0.06141	0.01606	-0.01464	-0.03183	-0.00669								601.2	-0.0751593	-0.000963043	-0.0354458	-0.0409374	-0.0247699
603.3	0.1009	0.8899	0.8067	1.0964	3.1118		603.3	-0.02877	0.0121	-0.03818	-0.03663	0.02674								603.3	-0.0425193	-0.00492304	-0.0589858	-0.0457374	0.00866014
605.4	0.0757	0.8644	0.8131	1.089	3.1084		605.4	-0.05403	-0.01346	-0.03181	-0.04412	0.02278								605.4	-0.0677793	-0.030483	-0.0526158	-0.0532274	0.00470014
607.5	0.0921	0.8689	0.8172	1.1066	3.0949		607.5	-0.03769	-0.00901	-0.02774	-0.02662	0.00871								607.5	-0.0514393	-0.026033	-0.0485458	-0.0357274	-0.00936986
609.6	0.0845	0.8736	0.8221	1.0854	3.0906		609.6	-0.04534	-0.00437	-0.02288	-0.04792	0.00385								609.6	-0.0590893	-0.021393	-0.0436858	-0.0570274	-0.0142299
611.7	0.0596	0.8812	0.8294	1.1047	3.0666		611.7	-0.0703	0.00317	-0.01561	-0.02871	-0.02072								611.7	-0.0840493	-0.013853	-0.0364158	-0.0378174	-0.0387999
613.8	0.0974	0.8904	0.795	1.1014	3.0866		613.8	-0.03256	0.01231	-0.05004	-0.03211	-0.00128								613.8	-0.0463093	-0.00471304	-0.0708458	-0.0412174	-0.0193599
615.9	0.1068	0.8705	0.8083	1.1324	3.0924		615.9	-0.02322	-0.00764	-0.03678	-0.00121	0.00395								615.9	-0.0369693	-0.024663	-0.0575858	-0.0103174	-0.0141299
618	0.11	0.8571	0.8302	1.1066	3.0846		618	-0.02007	-0.0211	-0.01491	-0.0271	-0.00441								618	-0.0338193	-0.038123	-0.0357158	-0.0362074	-0.0224899
620.1	0.1277	0.877	0.8234	1.1074	3.0692		620.1	-0.00243	-0.00126	-0.02174	-0.0264	-0.02037								620.1	-0.0161793	-0.018283	-0.0425458	-0.0355074	-0.0384499
622.2	0.1213	0.8901	0.8115	1.1101	3.0832		622.2	-0.00889	0.01178	-0.03368	-0.0238	-0.00694								622.2	-0.0226393	-0.00524304	-0.0544858	-0.0329074	-0.0250199
624.3	0.1154	0.8626	0.7799	1.0972	3.1055		624.3	-0.01485	-0.01577	-0.06531	-0.03679	0.0148								624.3	-0.0285993	-0.032793	-0.0861158	-0.0458974	-0.00327986
626.4	0.102	0.8715	0.8126	1.0827	3.1264		626.4	-0.0283	-0.00693	-0.03264	-0.05139	0.03513								626.4	-0.0420493	-0.023953	-0.0534458	-0.0604974	0.0170501
628.5	0.1087	0.871	0.835	1.0703	3.1032		628.5	-0.02166	-0.00749	-0.01028	-0.06389	0.01137								628.5	-0.0354093	-0.024513	-0.0310858	-0.0729974	-0.00670986
630.6	0.1138	0.8781	0.8094	1.0835	3.0981		630.6	-0.01662	-0.00044594	-0.03591	-0.05079	0.0057								630.6	-0.0303693	-0.017469	-0.0567158	-0.0598974	-0.0123799
632.7	0.1103	0.8762	0.7894	1.0717	3.0861		632.7	-0.02018	-0.0024	-0.05594	-0.06268	-0.00686								632.7	-0.0339293	-0.019423	-0.0767458	-0.0717874	-0.0249399
634.8	0.1385	0.8628	0.8175	1.0753	3.1164		634.8	0.00797	-0.01586	-0.02788	-0.05918	0.02287								634.8	-0.00577933	-0.032883	-0.0486858	-0.0682874	0.00479014
636.9	0.1433	0.8455	0.8234	1.0756	3.0795		636.9	0.01271	-0.03322	-0.02201	-0.05898	-0.01459								636.9	-0.00103933	-0.050243	-0.0428158	-0.0680874	-0.0326699
639	0.139	0.8594	0.8196	1.092	3.0835		639	0.00835	-0.01938	-0.02585	-0.04267	-0.01115								639	-0.00539933	-0.036403	-0.0466558	-0.0517774	-0.0292299
641.1	0.1385	0.8484	0.8142	1.0709	3.0849		641.1	0.00779	-0.03043	-0.03128	-0.06387	-0.01032								641.1	-0.00595933	-0.047453	-0.0520858	-0.0729774	-0.0283999
643.2	0.1495	0.8613	0.8545	1.0783	3.0981		643.2	0.01874	-0.01759	0.00899	-0.05657	0.00232								643.2	0.00499067	-0.034613	-0.0118158	-0.0656774	-0.0157599
645.3	0.1594	0.8796	0.8488	1.0577	3.1006		645.3	0.02858	0.000651399	0.00325	-0.07726	0.00425								645.3	0.0148307	-0.0163716	-0.0175558	-0.0863674	-0.0138299
647.4	0.1334	0.8471	0.845	1.1022	3.1204		647.4	0.00252	-0.03191	-0.000579028	-0.03286	0.02349								647.4	-0.0112293	-0.048933	-0.0213848	-0.0419674	0.00541014
649.5	0.142	0.8705	0.8553	1.1019	3.0863		649.5	0.01106	-0.00856	0.00969	-0.03326	-0.01118								649.5	-0.00268933	-0.025583	-0.0111158	-0.0423674	-0.0292599
651.6	0.1597	0.8728	0.8069	1.1233	3.0926		651.6	0.02871	-0.00632	-0.03875	-0.01195	-0.00544								651.6	0.0149607	-0.023343	-0.0595558	-0.0210574	-0.0235199
653.7	0.1667	0.8844	0.8353	1.1228	3.0783		653.7	0.03565	0.00522	-0.01038	-0.01255	-0.0203								653.7	0.0219007	-0.011803	-0.0311858	-0.0216574	-0.0383799
655.8	0.142	0.8642	0.8521	1.1115	3.1044		655.8	0.01089	-0.01504	0.00639	-0.02395	0.00523								655.8	-0.00285933	-0.032063	-0.0144158	-0.0330574	-0.0128499
657.9	0.1409	0.8324	0.8413	1.0931	3.1278		657.9	0.00973	-0.04689	-0.00445	-0.04245	0.02807								657.9	-0.00401933	-0.063913	-0.0252558	-0.0515574	0.00999014
660	0.1261	0.8558	0.8134	1.0791	3.1264		660	-0.00512	-0.02355	-0.03238	-0.05654	0.0261								660	-0.0188693	-0.040573	-0.0531858	-0.0656474	0.00802014
662.1	0.1347	0.8657	0.8096	1.1154	3.113		662.1	0.00342	-0.01371	-0.03621	-0.02034	0.01214								662.1	-0.0103293	-0.030733	-0.0570158	-0.0294474	-0.00593986
664.2	0.1707	0.871	0.815	1.1321	3.113		664.2	0.03936	-0.00847	-0.03085	-0.00374	0.01157								664.2	0.0256107	-0.025493	-0.0516558	-0.0128474	-0.00650986
666.3	0.1433	0.8752	0.7994	1.1143	3.1333		666.3	0.0119	-0.00432	-0.04648	-0.02163	0.03131								666.3	-0.00184933	-0.021343	-0.0672858	-0.0307374	0.0132301
668.4	0.1433	0.8555	0.8364	1.0871	3.1364		668.4	0.01185	-0.02408	-0.00951	-0.04893	0.03384								668.4	-0.00189933	-0.041103	-0.0303158	-0.0580374	0.0157601
670.5	0.1382	0.8542	0.8267	1.1025	3.0849		670.5	0.00669	-0.02544	-0.01925	-0.03363	-0.01822								670.5	-0.00705933	-0.042463	-0.0400558	-0.0427374	-0.0362999
672.6	0.1514	0.9082	0.8483	1.1082	3.0909		672.6	0.01983	0.0285	0.00232	-0.02802	-0.01278								672.6	0.00608067	0.011477	-0.0184858	-0.0371274	-0.0308599
674.7	0.1167	0.8765	0.8129	1.1066	3.0672		674.7	-0.01493	-0.00325	-0.03311	-0.02972	-0.03705								674.7	-0.0286793	-0.020273	-0.0539158	-0.0388274	-0.0551299
676.8	0.1186	0.8725	0.8296	1.1041	3.0935		676.8	-0.01308	-0.00731	-0.01645	-0.03232	-0.01131								676.8	-0.0268293	-0.024333	-0.0372558	-0.0414274	-0.0293899
678.9	0.1379	0.8754	0.8467	1.1099	3.0889		678.9	0.00616	-0.00447	0.000619086	-0.02661	-0.01648								678.9	-0.00758933	-0.021493	-0.0201867	-0.0357174	-0.0345599
681	0.1181	0.8647	0.8272	1.1005	3.1192		681	-0.0137	-0.01523	-0.01891	-0.03611	0.01326								681	-0.0274493	-0.032253	-0.0397158	-0.0452174	-0.00481986
683.1	0.1165	0.8607	0.8226	1.0841	3.0978		683.1	-0.01536	-0.01928	-0.02355	-0.05261	-0.00871								683.1	-0.0291093	-0.036303	-0.0443558	-0.0617174	-0.0267899
685.2	0.1178	0.8597	0.8177	1.0964	3.1164		685.2	-0.01411	-0.02034	-0.02848	-0.0404	0.00933								685.2	-0.0278593	-0.037363	-0.0492858	-0.0495074	-0.00874986
687.3	0.1425	0.8636	0.841	1.0975	3.1024		687.3	0.01053	-0.0165	-0.00521	-0.0394	-0.00523								687.3	-0.00321933	-0.033523	-0.0260158	-0.0485074	-0.0233099
689.4	0.1514	0.8705	0.8286	1.0797	3.1104		689.4	0.01937	-0.00966	-0.01765	-0.0573	0.0022								689.4	0.00562067	-0.026683	-0.0384558	-0.0664074	-0.0158799
691.5	0.153	0.8684	0.8372	1.1	3.0978		691.5	0.02091	-0.01181	-0.00908	-0.0371	-0.01096								691.5	0.00716067	-0.028833	-0.0298858	-0.0462074	-0.0290399
693.6	0.132	0.8862	0.8377	1.1022	3.0895		693.6	-0.000144753	0.00593	-0.00862	-0.03499	-0.01983								693.6	-0.0138941	-0.011093	-0.0294258	-0.0440974	-0.0379099
695.7	0.1181	0.8817	0.8472	1.131	3.1001		695.7	-0.0141	0.00137	0.000851413	-0.00629	-0.00979								695.7	-0.0278493	-0.015653	-0.0199543	-0.0153974	-0.0278699
697.8	0.1122	0.8809	0.8572	1.1209	3.1313		697.8	-0.02006	0.000513323	0.01082	-0.01649	0.02084								697.8	-0.0338093	-0.0165097	-0.00998575	-0.0255974	0.00276014
699.9	0.1063	0.86	0.8458	1.1425	3.1141		699.9	-0.02602	-0.02044	-0.000615505	0.00502	0.00308								699.9	-0.0397693	-0.037463	-0.0214213	-0.00408738	-0.0149999
702	0.1243	0.8539	0.8429	1.1162	3.1235		702	-0.00807	-0.0266	-0.00355	-0.02138	0.01191								702	-0.0218193	-0.043623	-0.0243558	-0.0304874	-0.00616986
704.1	0.1009	0.8421	0.8156	1.0981	3.1516		704.1	-0.03153	-0.03846	-0.03088	-0.03958	0.03945								704.1	-0.0452793	-0.055483	-0.0516858	-0.0486874	0.0213701
706.2	0.0937	0.8715	0.8356	1.0802	3.1387		706.2	-0.03879	-0.00912	-0.01092	-0.05757	0.02599								706.2	-0.0525393	-0.026143	-0.0317258	-0.0666774	0.00791014
708.3	0.1226	0.8712	0.8375	1.0992	3.1155		708.3	-0.00995	-0.00947	-0.00905	-0.03867	0.00222								708.3	-0.0236993	-0.026493	-0.0298558	-0.0477774	-0.0158599
710.4	0.0835	0.8453	0.8118	1.0838	3.1258		710.4	-0.0491	-0.03543	-0.03478	-0.05417	0.01196								710.4	-0.0628493	-0.052453	-0.0555858	-0.0632774	-0.00611986
712.5	0.0743	0.8516	0.8169	1.1003	3.1192		712.5	-0.05836	-0.02919	-0.02972	-0.03776	0.00479								712.5	-0.0721093	-0.046213	-0.0505258	-0.0468674	-0.0132899
714.6	0.1286	0.8867	0.825	1.0934	3.1433		714.6	-0.00412	0.00585	-0.02165	-0.04476	0.02833								714.6	-0.0178693	-0.011173	-0.0424558	-0.0538674	0.0102501
716.7	0.1229	0.8796	0.8299	1.0797	3.1499		716.7	-0.00988	-0.0013	-0.01678	-0.05856	0.03436								716.7	-0.0236293	-0.018323	-0.0375858	-0.0676674	0.0162801
718.8	0.168	0.8442	0.8199	1.086	3.1501		718.8	0.03517	-0.03676	-0.02682	-0.05236	0.034								718.8	0.0214207	-0.053783	-0.0476258	-0.0614674	0.0159201
720.9	0.1406	0.8605	0.8507	1.0978	3.1006		720.9	0.00771	-0.02052	0.00395	-0.04065	-0.01607								720.9	-0.00603933	-0.037543	-0.0168558	-0.0497574	-0.0341499
723	0.1613	0.8516	0.8345	1.0931	3.1224		723	0.02835	-0.02948	-0.01228	-0.04545	0.00517								723	0.0146007	-0.046503	-0.0330858	-0.0545574	-0.0129099
725.1	0.1291	0.8107	0.8318	1.0961	3.1396		725.1	-0.00391	-0.07043	-0.01502	-0.04255	0.02181								725.1	-0.0176593	-0.087453	-0.0358258	-0.0516574	0.00373014
727.2	0.1618	0.845	0.8223	1.097	3.1338		727.2	0.02874	-0.03619	-0.02455	-0.04174	0.01544								727.2	0.0149907	-0.053213	-0.0453558	-0.0508474	-0.00263986
729.3	0.1192	0.8167	0.814	1.0876	3.145		729.3	-0.01392	-0.06455	-0.03288	-0.05124	0.02608								729.3	-0.0276693	-0.081573	-0.0536858	-0.0603474	0.00800014
731.4	0.1138	0.8518	0.8113	1.0978	3.1447		731.4	-0.01938	-0.02951	-0.03562	-0.04114	0.02521								731.4	-0.0331293	-0.046533	-0.0564258	-0.0502474	0.00713014
733.5	0.0778	0.8736	0.8391	1.1176	3.1313		733.5	-0.05544	-0.00776	-0.00785	-0.02143	0.01125								733.5	-0.0691893	-0.024783	-0.0286558	-0.0305374	-0.00682986
735.6	0.1006	0.8628	0.8561	1.1052	3.137		735.6	-0.0327	-0.01862	0.00912	-0.03393	0.01638								735.6	-0.0464493	-0.035643	-0.0116858	-0.0430374	-0.00169986
737.7	0.1114	0.8689	0.8426	1.108	3.1384		737.7	-0.02195	-0.01258	-0.00442	-0.03123	0.01722								737.7	-0.0356993	-0.029603	-0.0252258	-0.0403374	-0.000859855
739.8	0.1157	0.8715	0.8575	1.1192	3.1424		739.8	-0.01771	-0.01004	0.01045	-0.02012	0.02066								739.8	-0.0314593	-0.027063	-0.0103558	-0.0292274	0.00258014
741.9	0.1073	0.8699	0.8629	1.1156	3.1198		741.9	-0.02617	-0.01169	0.01582	-0.02382	-0.00251								741.9	-0.0399193	-0.028713	-0.00498575	-0.0329274	-0.0205899
744	0.0926	0.8896	0.8721	1.1096	3.1107		744	-0.04093	0.00795	0.02498	-0.02992	-0.01217								744	-0.0546793	-0.00907304	0.00417425	-0.0390274	-0.0302499
746.1	0.1133	0.8817	0.8572	1.0972	3.1484		746.1	-0.02028	-9.70653e-06	0.01005	-0.04242	0.02496								746.1	-0.0340293	-0.0170327	-0.0107558	-0.0515274	0.00688014
748.2	0.0918	0.8471	0.8472	1.1145	3.1524		748.2	-0.04184	-0.03467	1.49355e-05	-0.02521	0.0284								748.2	-0.0555893	-0.051693	-0.0207908	-0.0343174	0.0103201
750.3	0.1186	0.8484	0.8167	1.1027	3.1439		750.3	-0.0151	-0.03342	-0.03052	-0.03711	0.01933								750.3	-0.0288493	-0.050443	-0.0513258	-0.0462174	0.00125014
752.4	0.1071	0.8508	0.8196	1.1184	3.1009		752.4	-0.02666	-0.03108	-0.02765	-0.02151	-0.02423								752.4	-0.0404093	-0.048103	-0.0484558	-0.0306174	-0.0423099
754.5	0.1135	0.8836	0.8467	1.1283	3.1418		754.5	-0.02031	0.00166	-0.000585442	-0.0117	0.0161								754.5	-0.0340593	-0.015363	-0.0213912	-0.0208074	-0.00197986
756.6	0.1457	0.8893	0.8491	1.097	3.1387		756.6	0.01183	0.0073	0.00178	-0.0431	0.01244								756.6	-0.00191933	-0.00972304	-0.0190258	-0.0522074	-0.00563986
758.7	0.1133	0.8988	0.8461	1.1022	3.1178		758.7	-0.02063	0.01675	-0.00125	-0.038	-0.00902								758.7	-0.0343793	-0.000273043	-0.0220558	-0.0471074	-0.0270999
760.8	0.1197	0.8878	0.8453	1.1014	3.1164		760.8	-0.01429	0.00569	-0.00209	-0.03889	-0.01099								760.8	-0.0280393	-0.011333	-0.0228958	-0.0479974	-0.0290699
762.9	0.1119	0.8935	0.8358	1.1269	3.1376		762.9	-0.02214	0.01133	-0.01162	-0.01349	0.00965								762.9	-0.0358893	-0.00569304	-0.0324258	-0.0225974	-0.00842986
765	0.1116	0.8899	0.8296	1.0983	3.0863		765	-0.0225	0.00767	-0.01785	-0.04219	-0.04222								765	-0.0362493	-0.00935304	-0.0386558	-0.0512974	-0.0602999
767.1	0.1463	0.8948	0.8896	1.0789	3.0989		767.1	0.01214	0.01252	0.04211	-0.06168	-0.03018								767.1	-0.00160933	-0.00450304	0.0213042	-0.0707874	-0.0482599
769.2	0.1114	0.8746	0.8483	1.1288	3.133		769.2	-0.02282	-0.00774	0.000780345	-0.01188	0.00335								769.2	-0.0365693	-0.024763	-0.0200254	-0.0209874	-0.0147299
771.3	0.1184	0.8615	0.825	1.1118	3.1441		771.3	-0.01587	-0.0209	-0.02255	-0.02898	0.01389								771.3	-0.0296193	-0.037923	-0.0433558	-0.0380874	-0.00418986
773.4	0.1318	0.8767	0.8496	1.0835	3.129		773.4	-0.00253	-0.00576	0.00201	-0.05737	-0.00177								773.4	-0.0162793	-0.022783	-0.0187958	-0.0664774	-0.0198499
775.5	0.1275	0.8707	0.828	1.0412	3.1144		775.5	-0.00689	-0.01182	-0.01962	-0.09977	-0.01694								775.5	-0.0206393	-0.028843	-0.0404258	-0.108877	-0.0350199
777.6	0.1261	0.8589	0.8077	1.094	3.1064		777.6	-0.00835	-0.02367	-0.03995	-0.04707	-0.0255								777.6	-0.0220993	-0.040693	-0.0607558	-0.0561774	-0.0435799
779.7	0.1538	0.8642	0.8369	1.0725	3.1215		779.7	0.0193	-0.01843	-0.01079	-0.06867	-0.01097								779.7	0.00555067	-0.035453	-0.0315958	-0.0777774	-0.0290499
781.8	0.1822	0.9192	0.8796	1.1016	3.1613		781.8	0.04764	0.03651	0.03188	-0.03966	0.02827								781.8	0.0338907	0.019487	0.0110742	-0.0487674	0.0101901
783.9	0.1774	0.93	0.8758	1.1236	3.173		783.9	0.04278	0.04725	0.02805	-0.01776	0.0394								783.9	0.0290307	0.030227	0.00724425	-0.0268674	0.0213201
786	0.1943	0.9266	0.8648	1.0983	3.1533		786	0.05962	0.0438	0.01701	-0.04316	0.01914								786	0.0458707	0.026777	-0.00379575	-0.0522674	0.00106014
788.1	0.182	0.9302	0.8718	1.1112	3.173		788.1	0.04727	0.04734	0.02398	-0.03035	0.03827								788.1	0.0335207	0.030317	0.00317425	-0.0394574	0.0201901
790.2	0.1701	0.9127	0.8821	1.1143	3.1819		790.2	0.03531	0.02978	0.03425	-0.02735	0.04661								790.2	0.0215607	0.012757	0.0134442	-0.0364574	0.0285301
792.3	0.1546	0.9216	0.8867	1.1011	3.1848		792.3	0.01975	0.03862	0.03881	-0.04065	0.04895								792.3	0.00600067	0.021597	0.0180042	-0.0497574	0.0308701
794.4	0.1865	0.9266	0.8502	1.1274	3.1945		794.4	0.05159	0.04357	0.00228	-0.01444	0.05808								794.4	0.0378407	0.026547	-0.0185258	-0.0235474	0.0400001
796.5	0.1653	0.9024	0.8826	1.1252	3.1765		796.5	0.03034	0.01931	0.03465	-0.01674	0.03952								796.5	0.0165907	0.00228696	0.0138442	-0.0258474	0.0214401
798.6	0.1637	0.9329	0.8772	1.1101	3.1991		798.6	0.02868	0.04975	0.02921	-0.03194	0.06155								798.6	0.0149307	0.032727	0.00840425	-0.0410474	0.0434701
800.7	0.1261	0.9187	0.8769	1.1176	3.2148		800.7	-0.00898	0.03549	0.02888	-0.02453	0.07669								800.7	-0.0227293	0.018467	0.00807425	-0.0336374	0.0586101
802.8	0.1554	0.9103	0.8672	1.1381	3.234		802.8	0.02026	0.02704	0.01914	-0.00413	0.09532								802.8	0.00651067	0.010017	-0.00166575	-0.0132374	0.0772401
804.9	0.1575	0.9064	0.8791	1.1439	3.1853		804.9	0.02231	0.02308	0.03101	0.00157	0.04606								804.9	0.00856067	0.00605696	0.0102042	-0.00753738	0.0279801
807	0.1484	0.9203	0.9102	1.17	3.1819		807	0.01315	0.03692	0.06208	0.02757	0.04209								807	-0.000599328	0.019897	0.0412742	0.0184626	0.0240101
809.1	0.1844	0.8901	0.8758	1.1491	3.1713		809.1	0.04909	0.00666	0.02764	0.00658	0.03093								809.1	0.0353407	-0.010363	0.00683425	-0.00252738	0.0128501
811.2	0.1779	0.9205	0.8818	1.1395	3.1853		811.2	0.04253	0.03701	0.03361	-0.00312	0.04437								811.2	0.0287807	0.019987	0.0128042	-0.0122274	0.0262901
813.3	0.1264	0.903	0.8802	1.1436	3.1865		813.3	-0.00902	0.01945	0.03198	0.000884115	0.045								813.3	-0.0227693	0.00242696	0.0111742	-0.00822326	0.0269201
815.4	0.1744	0.8823	0.8958	1.142	3.1622		815.4	0.03892	-0.00131	0.04754	-0.000812787	0.02014								815.4	0.0251707	-0.018333	0.0267342	-0.00992017	0.00206014
817.5	0.2109	0.9219	0.8818	1.1313	3.2045		817.5	0.07536	0.03823	0.03351	-0.01161	0.06187								817.5	0.0616107	0.021207	0.0127042	-0.0207174	0.0437901
819.6	0.1946	0.9072	0.8853	1.1167	3.2011		819.6	0.059	0.02348	0.03698	-0.02631	0.05791								819.6	0.0452507	0.00645696	0.0161742	-0.0354174	0.0398301
821.7	0.1769	0.8888	0.8572	1.1104	3.2099		821.7	0.04125	0.00502	0.00884	-0.0327	0.06614								821.7	0.0275007	-0.012003	-0.0119658	-0.0418074	0.0480601
823.8	0.1798	0.887	0.8515	1.1357	3.2022		823.8	0.04409	0.00316	0.00311	-0.0075	0.05788								823.8	0.0303407	-0.013863	-0.0176958	-0.0166074	0.0398001
825.9	0.1785	0.8927	0.8521	1.1511	3.2054		825.9	0.04273	0.0088	0.00368	0.0078	0.06052								825.9	0.0289807	-0.00822304	-0.0171258	-0.00130738	0.0424401
828	0.2048	0.9022	0.8423	1.1236	3.222		828	0.06897	0.01825	-0.00616	-0.01979	0.07655								828	0.0552207	0.00122696	-0.0269658	-0.0288974	0.0584701
830.1	0.1828	0.9274	0.871	1.0898	3.1945		830.1	0.04692	0.04339	0.02251	-0.05369	0.04849								830.1	0.0331707	0.026367	0.00170425	-0.0627974	0.0304101
832.2	0.168	0.8783	0.8434	1.1329	3.1756		832.2	0.03206	-0.00577	-0.00512	-0.01069	0.02902								832.2	0.0183107	-0.022793	-0.0259258	-0.0197974	0.0109401
834.3	0.1667	0.9184	0.8396	1.1401	3.1773		834.3	0.0307	0.03427	-0.00896	-0.00358	0.03016								834.3	0.0169507	0.017247	-0.0297658	-0.0126874	0.0120801
836.4	0.1583	0.8925	0.8429	1.1491	3.1748		836.4	0.02224	0.00832	-0.00569	0.00532	0.02709								836.4	0.00849067	-0.00870304	-0.0264958	-0.00378738	0.00901014
838.5	0.1809	0.9318	0.8329	1.1365	3.1453		838.5	0.04479	0.04756	-0.01572	-0.00738	-0.00297								838.5	0.0310407	0.030537	-0.0365258	-0.0164874	-0.0210499
840.6	0.1782	0.9347	0.8691	1.1255	3.1539		840.6	0.04203	0.0504	0.02044	-0.01848	0.00506								840.6	0.0282807	0.033377	-0.000365751	-0.0275874	-0.0130199
842.7	0.183	0.9224	0.8585	1.1099	3.149		842.7	0.04677	0.03804	0.00981	-0.03417	-0.0004								842.7	0.0330207	0.021017	-0.0109958	-0.0432774	-0.0184799
844.8	0.1747	0.9077	0.8642	1.142	3.1467		844.8	0.03841	0.02329	0.01548	-0.00217	-0.00326								844.8	0.0246607	0.00626696	-0.00532575	-0.0112774	-0.0213399
846.9	0.1854	0.9127	0.8502	1.1576	3.1596		846.9	0.04906	0.02823	0.00144	0.01333	0.00907								846.9	0.0353107	0.011207	-0.0193658	0.00422262	-0.00900986
849	0.2171	0.9009	0.8731	1.162	3.1627		849	0.0807	0.01637	0.02431	0.01764	0.01161								849	0.0669507	-0.000653043	0.00350425	0.00853262	-0.00646986
851.1	0.1994	0.9003	0.8931	1.1598	3.179		851.1	0.06294	0.01571	0.04428	0.01534	0.02734								851.1	0.0491907	-0.00131304	0.0234742	0.00623262	0.00926014
853.2	0.1736	0.8985	0.8713	1.156	3.1713		853.2	0.03708	0.01386	0.02244	0.01144	0.01908								853.2	0.0233307	-0.00316304	0.00163425	0.00233262	0.00100014
855.3	0.1838	0.915	0.8656	1.1417	3.1799		855.3	0.04723	0.0303	0.01671	-0.00295	0.02711								855.3	0.0334807	0.013277	-0.00409575	-0.0120574	0.00903014
857.4	0.1922	0.8857	0.8361	1.1571	3.1627		857.4	0.05557	0.000941573	-0.01282	0.01235	0.00935								857.4	0.0418207	-0.0160815	-0.0336258	0.00324262	-0.00872986
859.5	0.154	0.8893	0.8764	1.1392	3.1702		859.5	0.01731	0.00448	0.02744	-0.00565	0.01628								859.5	0.00356067	-0.012543	0.00663425	-0.0147574	-0.00179986
861.6	0.1828	0.8857	0.8664	1.1456	3.1687		861.6	0.04605	0.000826527	0.01741	0.000655358	0.01422								861.6	0.0323007	-0.0161965	-0.00339575	-0.00845202	-0.00385986
863.7	0.175	0.898	0.8621	1.128	3.1636		863.7	0.0382	0.01307	0.01307	-0.01704	0.00856								863.7	0.0244507	-0.00395304	-0.00773575	-0.0261474	-0.00951986
865.8	0.1653	0.9009	0.8621	1.1189	3.1513		865.8	0.02844	0.01591	0.01304	-0.02624	-0.00431								865.8	0.0146907	-0.00111304	-0.00776575	-0.0353474	-0.0223899
867.9	0.1699	0.9061	0.8675	1.0975	3.1656		867.9	0.03298	0.02105	0.01841	-0.04774	0.00943								867.9	0.0192307	0.00402696	-0.00239575	-0.0568474	-0.00864986
870	0.1659	0.9059	0.868	1.1305	3.1659		870	0.02892	0.0208	0.01887	-0.01483	0.00916								870	0.0151707	0.00377696	-0.00193575	-0.0239374	-0.00891986
872.1	0.1589	0.8941	0.8961	1.1239	3.169		872.1	0.02187	0.00894	0.04694	-0.02153	0.0117								872.1	0.00812067	-0.00808304	0.0261342	-0.0306374	-0.00637986
874.2	0.1752	0.9043	0.8975	1.1351	3.1959		874.2	0.03811	0.01908	0.04831	-0.01043	0.03803								874.2	0.0243607	0.00205696	0.0275042	-0.0195374	0.0199501
876.3	0.1774	0.9111	0.8842	1.1148	3.1985		876.3	0.04025	0.02582	0.03497	-0.03082	0.04007								876.3	0.0265007	0.00879696	0.0141642	-0.0399274	0.0219901
878.4	0.1718	0.8864	0.8867	1.1184	3.1793		878.4	0.03459	0.00107	0.03744	-0.02732	0.02031								878.4	0.0208407	-0.015953	0.0166342	-0.0364274	0.00223014
880.5	0.1983	0.9032	0.8634	1.1211	3.1862		880.5	0.06104	0.01781	0.01411	-0.02472	0.02664								880.5	0.0472907	0.000786957	-0.00669575	-0.0338274	0.00856014
882.6	0.1956	0.9148	0.8731	1.1299	3.2057		882.6	0.05828	0.02935	0.02377	-0.01601	0.04558								882.6	0.0445307	0.012327	0.00296425	-0.0251174	0.0275001
884.7	0.1578	0.9101	0.8872	1.1285	3.2019		884.7	0.02042	0.02459	0.03784	-0.01751	0.04121								884.7	0.00667067	0.00756696	0.0170342	-0.0266174	0.0231301
886.8	0.1863	0.9224	0.9134	1.1554	3.181		886.8	0.04886	0.03684	0.06401	0.00929	0.01975								886.8	0.0351107	0.019817	0.0432042	0.000182621	0.00167014
888.9	0.2045	0.9221	0.9048	1.1003	3.1996		888.9	0.06701	0.03648	0.05537	-0.0459	0.03778								888.9	0.0532607	0.019457	0.0345642	-0.0550074	0.0197001
891	0.204	0.9187	0.8967	1.1011	3.2057		891	0.06645	0.03302	0.04724	-0.0452	0.04332								891	0.0527007	0.015997	0.0264342	-0.0543074	0.0252401
893.1	0.1675	0.9003	0.8775	1.1014	3.1836		893.1	0.02989	0.01456	0.02801	-0.045	0.02065								893.1	0.0161407	-0.00246304	0.00720425	-0.0541074	0.00257014
895.2	0.1345	0.9161	0.901	1.1	3.1682		895.2	-0.00317	0.03031	0.05147	-0.0465	0.00469								895.2	-0.0169193	0.013287	0.0306642	-0.0556074	-0.0133899
897.3	0.1583	0.9129	0.8999	1.1041	3.171		897.3	0.02058	0.02705	0.05034	-0.04249	0.00693								897.3	0.00683067	0.010027	0.0295342	-0.0515974	-0.0111499
899.4	0.1739	0.9122	0.8953	1.1049	3.1822		899.4	0.03612	0.02629	0.04571	-0.04179	0.01756								899.4	0.0223707	0.00926696	0.0249042	-0.0508974	-0.000519855
901.5	0.1651	0.9232	0.8869	1.1231	3.1805		901.5	0.02726	0.03723	0.03727	-0.02369	0.0153								901.5	0.0135107	0.020207	0.0164642	-0.0327974	-0.00277986
903.6	0.1562	0.9163	0.8858	1.1082	3.1842		903.6	0.0183	0.03028	0.03614	-0.03868	0.01843								903.6	0.00455067	0.013257	0.0153342	-0.0477874	0.000350145
905.7	0.1897	0.8859	0.8983	1.1277	3.2217		905.7	0.05175	-0.000181457	0.04861	-0.01928	0.05537								905.7	0.0380007	-0.0172045	0.0278042	-0.0283874	0.0372901
907.8	0.1661	0.8802	0.858	1.103	3.2108		907.8	0.02809	-0.00594	0.00827	-0.04408	0.0439								907.8	0.0143407	-0.022963	-0.0125358	-0.0531874	0.0258201
909.9	0.1455	0.8812	0.8967	1.1222	3.1882		909.9	0.00743	-0.005	0.04694	-0.02497	0.02074								909.9	-0.00631933	-0.022023	0.0261342	-0.0340774	0.00266014
912	0.1661	0.899	0.8553	1.1486	3.2028		912	0.02797	0.01275	0.00551	0.00133	0.03477								912	0.0142207	-0.00427304	-0.0152958	-0.00777738	0.0166901
914.1	0.157	0.8673	0.851	1.1697	3.254		914.1	0.01882	-0.01901	0.00117	0.02233	0.08541								914.1	0.00507067	-0.036033	-0.0196358	0.0132226	0.0673301
916.2	0.1908	0.9011	0.8688	1.1261	3.2257		916.2	0.05256	0.01473	0.01894	-0.02136	0.05655								916.2	0.0388107	-0.00229304	-0.00186575	-0.0304674	0.0384701
918.3	0.1379	0.8804	0.871	1.1376	3.2569		918.3	-0.000398622	-0.00603	0.0211	-0.00996	0.08718								918.3	-0.0141479	-0.023053	0.000294249	-0.0190674	0.0691001
920.4	0.1651	0.9014	0.8829	1.1134	3.226		920.4	0.02674	0.01492	0.03297	-0.03426	0.05572								920.4	0.0129907	-0.00210304	0.0121642	-0.0433674	0.0376401
922.5	0.1565	0.9059	0.8691	1.1505	3.2151		922.5	0.01809	0.01936	0.01914	0.00275	0.04425								922.5	0.00434067	0.00233696	-0.00166575	-0.00635738	0.0261701
924.6	0.1677	0.9174	0.8694	1.1634	3.2614		924.6	0.02923	0.0308	0.0194	0.01555	0.08999								924.6	0.0154807	0.013777	-0.00140575	0.00644262	0.0719101
926.7	0.1766	0.8607	0.8718	1.1233	3.222		926.7	0.03807	-0.02596	0.02177	-0.02465	0.05002								926.7	0.0243207	-0.042983	0.000964249	-0.0337574	0.0319401
928.8	0.1659	0.9211	0.8653	1.136	3.2323		928.8	0.02731	0.03439	0.01524	-0.01205	0.05976								928.8	0.0135607	0.017367	-0.00556575	-0.0211574	0.0416801
930.9	0.1557	0.9384	0.8915	1.1371	3.1888		930.9	0.01706	0.05163	0.0414	-0.01104	0.0157								930.9	0.00331067	0.034607	0.0205942	-0.0201474	-0.00237986
933	0.2015	0.9344	0.8937	1.1414	3.1948		933	0.0628	0.04757	0.04357	-0.00684	0.02113								933	0.0490507	0.030547	0.0227642	-0.0159474	0.00305014
935.1	0.1863	0.9363	0.8821	1.1601	3.2145		935.1	0.04754	0.04941	0.03194	0.01176	0.04027								935.1	0.0337907	0.032387	0.0111342	0.00265262	0.0221901
937.2	0.153	0.9066	0.8877	1.1467	3.1996		937.2	0.01418	0.01966	0.0375	-0.00173	0.0248								937.2	0.000430672	0.00263696	0.0166942	-0.0108374	0.00672014
939.3	0.1398	0.8851	0.8761	1.1681	3.1982		939.3	0.00092625	-0.0019	0.02587	0.01957	0.02284								939.3	-0.0128231	-0.018923	0.00506425	0.0104626	0.00476014
941.4	0.142	0.8875	0.8558	1.1436	3.2045		941.4	0.00307	0.000440651	0.00554	-0.00503	0.02857								941.4	-0.0106793	-0.0165824	-0.0152658	-0.0141374	0.0104901
943.5	0.1546	0.8851	0.8718	1.1486	3.1933		943.5	0.01561	-0.00202	0.0215	-0.00012384	0.01681								943.5	0.00186067	-0.019043	0.000694249	-0.00923122	-0.00126986
945.6	0.1758	0.8697	0.8491	1.1398	3.2174		945.6	0.03675	-0.01747	-0.00123	-0.00902	0.04034								945.6	0.0230007	-0.034493	-0.0220358	-0.0181274	0.0222601
947.7	0.168	0.8744	0.8545	1.1653	3.2077		947.7	0.0289	-0.01283	0.00414	0.01638	0.03008								947.7	0.0151507	-0.029853	-0.0166658	0.00727262	0.0120001
949.8	0.1844	0.8833	0.8642	1.1247	3.2117		949.8	0.04524	-0.00399	0.0138	-0.02431	0.03352								949.8	0.0314907	-0.021013	-0.00700575	-0.0334174	0.0154401
951.9	0.1739	0.8836	0.8694	1.1505	3.2463		951.9	0.03468	-0.00375	0.01897	0.00139	0.06755								951.9	0.0209307	-0.020773	-0.00183575	-0.00771738	0.0494701
954	0.1567	0.8791	0.8561	1.1494	3.2383		954	0.01742	-0.0083	0.00564	0.000191647	0.05899								954	0.00367067	-0.025323	-0.0151658	-0.00891573	0.0409101
956.1	0.1844	0.8941	0.874	1.1651	3.2426		956.1	0.04507	0.00664	0.0235	0.01579	0.06272								956.1	0.0313207	-0.010383	0.00269425	0.00668262	0.0446401
958.2	0.1892	0.8893	0.8769	1.1519	3.2025		958.2	0.04981	0.00178	0.02637	0.0025	0.02206								958.2	0.0360607	-0.015243	0.00556425	-0.00660738	0.00398014
960.3	0.1484	0.8668	0.8829	1.1557	3.2211		960.3	0.00895	-0.02078	0.03234	0.0062	0.04009								960.3	-0.00479933	-0.037803	0.0115342	-0.00290738	0.0220101
962.4	0.1653	0.8904	0.8634	1.1431	3.2031		962.4	0.02579	0.00277	0.0128	-0.0065	0.02153								962.4	0.0120407	-0.014253	-0.00800575	-0.0156074	0.00345014
964.5	0.1793	0.8767	0.8615	1.1096	3.1971		964.5	0.03974	-0.01099	0.01087	-0.04009	0.01497								964.5	0.0259907	-0.028013	-0.00993575	-0.0491974	-0.00310986
966.6	0.1549	0.8849	0.865	1.1596	3.2274		966.6	0.01528	-0.00285	0.01434	0.00981	0.0447								966.6	0.00153067	-0.019873	-0.00646575	0.000702621	0.0266201
968.7	0.1495	0.8922	0.8702	1.1472	3.1956		968.7	0.00982	0.00439	0.0195	-0.00269	0.01234								968.7	-0.00392933	-0.012633	-0.00130575	-0.0117974	-0.00573986
970.8	0.1463	0.9085	0.8491	1.1549	3.238		970.8	0.00656	0.02064	-0.00163	0.00492	0.05417								970.8	-0.00718933	0.00361696	-0.0224358	-0.00418738	0.0360901
972.9	0.1752	0.9009	0.8885	1.145	3.2451		972.9	0.03541	0.01298	0.03773	-0.00508	0.06071								972.9	0.0216607	-0.00404304	0.0169242	-0.0141874	0.0426301
975	0.154	0.8846	0.8783	1.1563	3.2583		975	0.01415	-0.00338	0.0275	0.00612	0.07334								975	0.000400672	-0.020403	0.00669425	-0.00298738	0.0552601
977.1	0.1323	0.8621	0.8888	1.1895	3.2423		977.1	-0.00761	-0.02594	0.03797	0.03923	0.05678								977.1	-0.0213593	-0.042963	0.0171642	0.0301226	0.0387001
979.2	0.1175	0.8468	0.8726	1.1788	3.2019		979.2	-0.02247	-0.04129	0.02173	0.02843	0.01581								979.2	-0.0362193	-0.058313	0.000924249	0.0193226	-0.00226986
981.3	0.1339	0.851	0.858	1.1579	3.1905		981.3	-0.00612	-0.03715	0.0071	0.00743	0.00385								981.3	-0.0198693	-0.054173	-0.0137058	-0.00167738	-0.0142299
983.4	0.1508	0.8864	0.8926	1.153	3.1911		983.4	0.01072	-0.00181	0.04167	0.00244	0.00389								983.4	-0.00302933	-0.018833	0.0208642	-0.00666738	-0.0141899
985.5	0.15	0.8497	0.8526	1.1651	3.214		985.5	0.00986	-0.03857	0.00163	0.01444	0.02622								985.5	-0.00388933	-0.055593	-0.0191758	0.00533262	0.00814014
987.6	0.117	0.872	0.8731	1.1651	3.1974		987.6	-0.0232	-0.01632	0.0221	0.01434	0.00906								987.6	-0.0369493	-0.033343	0.00129425	0.00523262	-0.00901986
989.7	0.1707	0.9077	0.8753	1.1667	3.2134		989.7	0.03045	0.01932	0.02427	0.01584	0.02449								989.7	0.0167007	0.00229696	0.00346425	0.00673262	0.00641014
991.8	0.1409	0.8917	0.9002	1.1403	3.2065		991.8	0.00058843	0.00326	0.04913	-0.01065	0.01703								991.8	-0.0131609	-0.013763	0.0283242	-0.0197574	-0.00104986
993.9	0.1538	0.8875	0.8826	1.1376	3.1954		993.9	0.01343	-0.000997424	0.0315	-0.01345	0.00536								993.9	-0.000319328	-0.0180205	0.0106942	-0.0225574	-0.0127199
996	0.1575	0.8922	0.8631	1.1129	3.2177		996	0.01707	0.00365	0.01197	-0.03825	0.0271								996	0.00332067	-0.013373	-0.00883575	-0.0473574	0.00902014
998.1	0.1511	0.8736	0.8821	1.1478	3.2045		998.1	0.01062	-0.01501	0.03093	-0.00344	0.01333								998.1	-0.00312933	-0.032033	0.0101242	-0.0125474	-0.00474986
1000.2	0.1302	0.867	0.8567	1.1392	3.2068		1000.2	-0.01034	-0.02167	0.0055	-0.01214	0.01507								1000.2	-0.0240893	-0.038693	-0.0153058	-0.0212474	-0.00300986
1002.3	0.1157	0.8757	0.8607	1.1261	3.2231		1002.3	-0.0249	-0.01303	0.00947	-0.02534	0.03081								1002.3	-0.0386493	-0.030053	-0.0113358	-0.0344474	0.0127301
1004.4	0.1149	0.8773	0.8731	1.1019	3.2071		1004.4	-0.02576	-0.01149	0.02183	-0.04963	0.01424								1004.4	-0.0395093	-0.028513	0.00102425	-0.0587374	-0.00383986
1006.5	0.1235	0.8739	0.8794	1.1469	3.2348		1006.5	-0.01721	-0.01494	0.0281	-0.00473	0.04138								1006.5	-0.0309593	-0.031963	0.00729425	-0.0138374	0.0233001
1008.6	0.1363	0.871	0.8777	1.1307	3.2574		1008.6	-0.00447	-0.0179	0.02637	-0.02103	0.06341								1008.6	-0.0182193	-0.034923	0.00556425	-0.0301374	0.0453301
1010.7	0.1468	0.8812	0.8753	1.145	3.2408		1010.7	0.00597	-0.00776	0.02393	-0.00682	0.04625								1010.7	-0.00777933	-0.024783	0.00312425	-0.0159274	0.0281701
1012.8	0.1436	0.8783	0.8958	1.1387	3.2454		1012.8	0.00271	-0.01072	0.0444	-0.01322	0.05028								1012.8	-0.0110393	-0.027743	0.0235942	-0.0223274	0.0322001
1014.9	0.1688	0.867	0.9021	1.1343	3.2752		1014.9	0.02786	-0.02207	0.05067	-0.01772	0.07952								1014.9	0.0141107	-0.039093	0.0298642	-0.0268274	0.0614401
1017	0.1747	0.8663	0.858	1.1228	3.2629		1017	0.0337	-0.02283	0.00653	-0.02932	0.06666								1017	0.0199507	-0.039853	-0.0142758	-0.0384274	0.0485801
1019.1	0.19	0.8783	0.8677	1.1381	3.2417		1019.1	0.04894	-0.01089	0.0162	-0.01411	0.04489								1019.1	0.0351907	-0.027913	-0.00460575	-0.0232174	0.0268101
1021.2	0.1688	0.8686	0.8769	1.1343	3.2094		1021.2	0.02768	-0.02065	0.02537	-0.01801	0.01203								1021.2	0.0139307	-0.037673	0.00456425	-0.0271174	-0.00604986
1023.3	0.1777	0.9019	0.8904	1.1192	3.2257		1023.3	0.03653	0.0126	0.03883	-0.03321	0.02776								1023.3	0.0227807	-0.00442304	0.0180242	-0.0423174	0.00968014
1025.4	0.1994	0.8728	0.8664	1.0778	3.2431		1025.4	0.05817	-0.01656	0.0148	-0.0747	0.0446								1025.4	0.0444207	-0.033583	-0.00600575	-0.0838074	0.0265201
1027.5	0.1919	0.9095	0.8891	1.1096	3.2514		1027.5	0.05061	0.02008	0.03746	-0.043	0.05233								1027.5	0.0368607	0.00305696	0.0166542	-0.0521074	0.0342501
1029.6	0.182	0.9132	0.8864	1.1014	3.2554		1029.6	0.04065	0.02372	0.03473	-0.0513	0.05577								1029.6	0.0269007	0.00669696	0.0139242	-0.0604074	0.0376901
1031.7	0.1895	0.8864	0.8796	1.12	3.2414		1031.7	0.0481	-0.00313	0.0279	-0.03279	0.0412								1031.7	0.0343507	-0.020153	0.00709425	-0.0418974	0.0231201
1033.8	0.1887	0.8904	0.8667	1.0841	3.2449		1033.8	0.04724	0.000809638	0.01496	-0.06879	0.04414								1033.8	0.0334907	-0.0162134	-0.00584575	-0.0778974	0.0260601
1035.9	0.168	0.8844	0.8937	1.0972	3.2583		1035.9	0.02648	-0.00525	0.04193	-0.05579	0.05698								1035.9	0.0127307	-0.022273	0.0211242	-0.0648974	0.0389001
1038	0.1337	0.8639	0.8845	1.092	3.2308		1038	-0.00788	-0.02581	0.0327	-0.06108	0.02891								1038	-0.0216293	-0.042833	0.0118942	-0.0701874	0.0108301
1040.1	0.1506	0.8775	0.8745	1.1247	3.2563		1040.1	0.00897	-0.01226	0.02266	-0.02848	0.05385								1040.1	-0.00477933	-0.029283	0.00185425	-0.0375874	0.0357701
1042.2	0.1613	0.8888	0.8761	1.1362	3.2629		1042.2	0.01961	-0.00102	0.02423	-0.01708	0.05988								1042.2	0.00586067	-0.018043	0.00342425	-0.0261874	0.0418001
1044.3	0.1718	0.8951	0.8775	1.0843	3.244		1044.3	0.03005	0.00522	0.0256	-0.06908	0.04042								1044.3	0.0163007	-0.011803	0.00479425	-0.0781874	0.0223401
1046.4	0.1758	0.9101	0.8899	1.1005	3.2469		1046.4	0.03399	0.02016	0.03796	-0.05297	0.04275								1046.4	0.0202407	0.00313696	0.0171542	-0.0620774	0.0246701
1048.5	0.1449	0.898	0.8931	1.128	3.2663		1048.5	0.00304	0.00801	0.04113	-0.02557	0.06159								1048.5	-0.0107093	-0.00901304	0.0203242	-0.0346774	0.0435101
1050.6	0.1294	0.8972	0.8653	1.15	3.2534		1050.6	-0.01252	0.00715	0.0133	-0.00367	0.04813								1050.6	-0.0262693	-0.00987304	-0.00750575	-0.0127774	0.0300501
1052.7	0.1758	0.8885	0.915	1.1381	3.2434		1052.7	0.03382	-0.00161	0.06296	-0.01566	0.03756								1052.7	0.0200707	-0.018633	0.0421542	-0.0247674	0.0194801
1054.8	0.1774	0.9011	0.9069	1.103	3.2311		1054.8	0.03536	0.01093	0.05483	-0.05086	0.0247								1054.8	0.0216107	-0.00609304	0.0340242	-0.0599674	0.00662014
1056.9	0.2083	0.9108	0.8799	1.1244	3.2623		1056.9	0.06621	0.02058	0.0278	-0.02956	0.05533								1056.9	0.0524607	0.00355696	0.00699425	-0.0386674	0.0372501
1059	0.1809	0.9024	0.8807	1.1261	3.2523		1059	0.03875	0.01212	0.02856	-0.02795	0.04477								1059	0.0250007	-0.00490304	0.00775425	-0.0370574	0.0266901
1061.1	0.1425	0.9061	0.8685	1.1511	3.2609		1061.1	0.000290508	0.01576	0.01633	-0.00305	0.0528								1061.1	-0.0134588	-0.00126304	-0.00447575	-0.0121574	0.0347201
1063.2	0.1758	0.9048	0.8731	1.1478	3.2119		1063.2	0.03353	0.0144	0.0209	-0.00645	0.00324								1063.2	0.0197807	-0.00262304	9.42489e-05	-0.0155574	-0.0148399
1065.3	0.153	0.8899	0.8718	1.1214	3.2451		1065.3	0.01068	-0.000553207	0.01956	-0.03294	0.03587								1065.3	-0.00306933	-0.0175763	-0.00124575	-0.0420474	0.0177901
1067.4	0.1379	0.8686	0.9034	1.1099	3.2431		1067.4	-0.00448	-0.02191	0.05113	-0.04454	0.03331								1067.4	-0.0182293	-0.038933	0.0303242	-0.0536474	0.0152301
1069.5	0.1342	0.876	0.8694	1.1788	3.256		1069.5	-0.00824	-0.01457	0.0171	0.02426	0.04565								1069.5	-0.0219893	-0.031593	-0.00370575	0.0151526	0.0275701
1071.6	0.1374	0.8859	0.8758	1.1494	3.2291		1071.6	-0.0051	-0.00473	0.02346	-0.00523	0.01818								1071.6	-0.0188493	-0.021753	0.00265425	-0.0143374	0.000100145
1073.7	0.1484	0.8815	0.8434	1.1409	3.2469		1073.7	0.00585	-0.00918	-0.00897	-0.01383	0.03542								1073.7	-0.00789933	-0.026203	-0.0297758	-0.0229374	0.0173401
1075.8	0.1613	0.8878	0.8523	1.1508	3.2471		1075.8	0.01869	-0.00294	-0.000104684	-0.00403	0.03505								1075.8	0.00494067	-0.019963	-0.0209104	-0.0131374	0.0169701
1077.9	0.179	0.8817	0.8286	1.1414	3.2454		1077.9	0.03633	-0.0091	-0.02384	-0.01353	0.03279								1077.9	0.0225807	-0.026123	-0.0446458	-0.0226374	0.0147101
1080	0.1905	0.8878	0.834	1.1442	3.2202		1080	0.04777	-0.00306	-0.01847	-0.01082	0.00702								1080	0.0340207	-0.020083	-0.0392758	-0.0199274	-0.0110599
1082.1	0.1675	0.8728	0.848	1.1274	3.238		1082.1	0.02472	-0.01811	-0.00451	-0.02772	0.02426								1082.1	0.0109707	-0.035133	-0.0253158	-0.0368274	0.00618014
1084.2	0.1854	0.8707	0.8677	1.1453	3.2491		1084.2	0.04256	-0.02027	0.01516	-0.00992	0.03479								1084.2	0.0288107	-0.037293	-0.00564575	-0.0190274	0.0167101
1086.3	0.2064	0.8864	0.8799	1.1288	3.2614		1086.3	0.0635	-0.00463	0.02733	-0.02651	0.04653								1086.3	0.0497507	-0.021653	0.00652425	-0.0356174	0.0284501
1088.4	0.19	0.8807	0.8723	1.1291	3.25		1088.4	0.04704	-0.01039	0.01969	-0.02631	0.03457								1088.4	0.0332907	-0.027413	-0.00111575	-0.0354174	0.0164901
1090.5	0.1948	0.8996	0.8853	1.1505	3.2377		1090.5	0.05179	0.00846	0.03266	-0.00501	0.0217								1090.5	0.0380407	-0.00856304	0.0118542	-0.0141174	0.00362014
1092.6	0.1863	0.9337	0.8837	1.1535	3.2726		1092.6	0.04323	0.0425	0.03103	-0.0021	0.05604								1092.6	0.0294807	0.025477	0.0102242	-0.0112074	0.0379601
1094.7	0.1965	0.9316	0.8775	1.1557	3.2569		1094.7	0.05337	0.04034	0.02479	-8.20671e-07	0.03977								1094.7	0.0396207	0.023317	0.00398425	-0.0091082	0.0216901
1096.8	0.171	0.9082	0.8818	1.136	3.2529		1096.8	0.02781	0.01688	0.02906	-0.0198	0.03521								1096.8	0.0140607	-0.000143043	0.00825425	-0.0289074	0.0171301
1098.9	0.1986	0.8854	0.9088	1.1291	3.2531		1098.9	0.05536	-0.00597	0.05603	-0.02679	0.03484								1098.9	0.0416107	-0.022993	0.0352242	-0.0358974	0.0167601
1101	0.135	0.8891	0.8988	1.1461	3.2597		1101	-0.0083	-0.00233	0.04599	-0.00989	0.04088								1101	-0.0220493	-0.019353	0.0251842	-0.0189974	0.0228001
1103.1	0.1425	0.9169	0.8888	1.1458	3.2686		1103.1	-0.000859748	0.02541	0.03596	-0.01029	0.04922								1103.1	-0.0146091	0.00838696	0.0151542	-0.0193974	0.0311401
1105.2	0.1583	0.9077	0.8667	1.1612	3.238		1105.2	0.01488	0.01615	0.01383	0.00501	0.01805								1105.2	0.00113067	-0.000873043	-0.00697575	-0.00409738	-2.98555e-05
1107.3	0.1594	0.8948	0.8967	1.1629	3.2583		1107.3	0.01593	0.0032	0.04379	0.00662	0.03779								1107.3	0.00218067	-0.013823	0.0229842	-0.00248738	0.0197101
1109.4	0.1591	0.8969	0.8937	1.1771	3.2511		1109.4	0.01557	0.00524	0.04076	0.02072	0.03002								1109.4	0.00182067	-0.011783	0.0199542	0.0116126	0.0119401
1111.5	0.1565	0.8744	0.9091	1.1414	3.2683		1111.5	0.01291	-0.01732	0.05613	-0.01508	0.04666								1111.5	-0.000839328	-0.034343	0.0353242	-0.0241874	0.0285801
1113.6	0.1514	0.8746	0.8556	1.1505	3.2726		1113.6	0.00775	-0.01718	0.00259	-0.00607	0.05039								1113.6	-0.00599933	-0.034203	-0.0182158	-0.0151774	0.0323101
1115.7	0.1567	0.8757	0.861	1.1486	3.2646		1115.7	0.013	-0.01613	0.00796	-0.00807	0.04183								1115.7	-0.000749328	-0.033153	-0.0128458	-0.0171774	0.0237501
1117.8	0.1884	0.8891	0.8826	1.1744	3.2626		1117.8	0.04464	-0.00279	0.02953	0.01763	0.03926								1117.8	0.0308907	-0.019813	0.00872425	0.00852262	0.0211801
1119.9	0.1798	0.8844	0.8656	1.1725	3.2986		1119.9	0.03598	-0.00755	0.01249	0.01564	0.0747								1119.9	0.0222307	-0.024573	-0.00831575	0.00653262	0.0566201
1122	0.1884	0.8647	0.8399	1.1716	3.2514		1122	0.04452	-0.02731	-0.01324	0.01464	0.02694								1122	0.0307707	-0.044333	-0.0340458	0.00553262	0.00886014
1124.1	0.1677	0.8935	0.8831	1.1387	3.3084		1124.1	0.02377	0.00144	0.02993	-0.01836	0.08337								1124.1	0.0100207	-0.015583	0.00912425	-0.0274674	0.0652901
1126.2	0.1307	0.8765	0.8618	1.1434	3.3149		1126.2	-0.01329	-0.01562	0.00859	-0.01375	0.08931								1126.2	-0.0270393	-0.032643	-0.0122158	-0.0228574	0.0712301
1128.3	0.1715	0.8935	0.845	1.1445	3.2823		1128.3	0.02745	0.00132	-0.00824	-0.01275	0.05614								1128.3	0.0137007	-0.015703	-0.0290458	-0.0218574	0.0380601
1130.4	0.1578	0.8823	0.8637	1.159	3.2869		1130.4	0.01369	-0.00994	0.01043	0.00165	0.06018								1130.4	-5.93276e-05	-0.026963	-0.0103758	-0.00745738	0.0421001
1132.5	0.1591	0.8725	0.8669	1.1508	3.2603		1132.5	0.01494	-0.01979	0.01359	-0.00665	0.03301								1132.5	0.00119067	-0.036813	-0.00721575	-0.0157574	0.0149301
1134.6	0.1409	0.8888	0.8621	1.1494	3.2649		1134.6	-0.00332	-0.00355	0.00876	-0.00814	0.03705								1134.6	-0.0170693	-0.020573	-0.0120458	-0.0172474	0.0189701
1136.7	0.1495	0.8605	0.8342	1.1302	3.2451		1136.7	0.00522	-0.03191	-0.01917	-0.02744	0.01668								1136.7	-0.00852933	-0.048933	-0.0399758	-0.0365474	-0.00139986
1138.8	0.1355	0.8767	0.8591	1.1659	3.2755		1138.8	-0.00884	-0.01577	0.00569	0.00816	0.04652								1138.8	-0.0225893	-0.032793	-0.0151158	-0.000947379	0.0284401
1140.9	0.1323	0.8844	0.848	1.1587	3.2815		1140.9	-0.01209	-0.00812	-0.00544	0.000867324	0.05196								1140.9	-0.0258393	-0.025143	-0.0262458	-0.00824005	0.0338801
1143	0.1557	0.8526	0.8369	1.187	3.2697		1143	0.01125	-0.03998	-0.01658	0.02907	0.03959								1143	-0.00249933	-0.057003	-0.0373858	0.0199626	0.0215101
1145.1	0.1755	0.8912	0.8407	1.1722	3.2683		1145.1	0.03099	-0.00144	-0.01281	0.01417	0.03763								1145.1	0.0172407	-0.018463	-0.0336158	0.00506262	0.0195501
1147.2	0.1634	0.8888	0.825	1.1436	3.2849		1147.2	0.01883	-0.0039	-0.02854	-0.01452	0.05366								1147.2	0.00508067	-0.020923	-0.0493458	-0.0236274	0.0355801
1149.3	0.1567	0.8872	0.8294	1.1428	3.2697		1149.3	0.01207	-0.00555	-0.02418	-0.01542	0.0379								1149.3	-0.00167933	-0.022573	-0.0449858	-0.0245274	0.0198201
1151.4	0.1766	0.9014	0.8299	1.1497	3.2921		1151.4	0.03192	0.00859	-0.02371	-0.00862	0.05973								1151.4	0.0181707	-0.00843304	-0.0445158	-0.0177274	0.0416501
1153.5	0.1854	0.9137	0.8026	1.1645	3.2606		1153.5	0.04066	0.02083	-0.05104	0.00609	0.02767								1153.5	0.0269107	0.00380696	-0.0718458	-0.00301738	0.00959014
1155.6	0.1742	0.9153	0.8213	1.1398	3.3038		1155.6	0.0294	0.02237	-0.03238	-0.01871	0.07031								1155.6	0.0156507	0.00534696	-0.0531858	-0.0278174	0.0522301
1157.7	0.1693	0.924	0.8272	1.1417	3.2992		1157.7	0.02444	0.03102	-0.02651	-0.01691	0.06514								1157.7	0.0106907	0.013997	-0.0473158	-0.0260174	0.0470601
1159.8	0.1895	0.931	0.8313	1.1618	3.2592		1159.8	0.04459	0.03796	-0.02244	0.0031	0.02458								1159.8	0.0308407	0.020937	-0.0432458	-0.00600738	0.00650014
1161.9	0.194	0.8901	0.8131	1.1585	3.2526		1161.9	0.04903	-0.003	-0.04068	-0.000301701	0.01741								1161.9	0.0352807	-0.020023	-0.0614858	-0.00940908	-0.000669855
1164	0.1621	0.9245	0.8467	1.1686	3.2746		1164	0.01707	0.03134	-0.00711	0.0097	0.03885								1164	0.00332067	0.014317	-0.0279158	0.000592621	0.0207701
1166.1	0.1616	0.9082	0.8548	1.1596	3.2717		1166.1	0.01651	0.01499	0.000956575	0.000604494	0.03538								1166.1	0.00276067	-0.00203304	-0.0198492	-0.00850288	0.0173001
1168.2	0.1275	0.9056	0.8534	1.1686	3.2529		1168.2	-0.01764	0.01233	-0.000476884	0.00951	0.01602								1168.2	-0.0313893	-0.00469304	-0.0212826	0.000402621	-0.00205986
1170.3	0.1581	0.9093	0.8496	1.1725	3.2657		1170.3	0.0129	0.01597	-0.00431	0.01331	0.02825								1170.3	-0.000849328	-0.00105304	-0.0251158	0.00420262	0.0101701
1172.4	0.1578	0.8954	0.8269	1.1631	3.2906		1172.4	0.01254	0.00201	-0.02704	0.00381	0.05259								1172.4	-0.00120933	-0.015013	-0.0478458	-0.00529738	0.0345101
1174.5	0.139	0.8854	0.8475	1.1469	3.2898		1174.5	-0.00632	-0.00804	-0.00648	-0.01248	0.05123								1174.5	-0.0200693	-0.025063	-0.0272858	-0.0215874	0.0331501
1176.6	0.1715	0.892	0.8548	1.1585	3.2895		1176.6	0.02613	-0.0015	0.000789279	-0.000980018	0.05036								1176.6	0.0123807	-0.018523	-0.0200165	-0.0100874	0.0322801
1178.7	0.1806	0.8933	0.8331	1.1557	3.2889		1178.7	0.03517	-0.000259451	-0.02094	-0.00388	0.0492								1178.7	0.0214207	-0.0172825	-0.0417458	-0.0129874	0.0311201
1180.8	0.1911	0.9093	0.828	1.1582	3.2886		1180.8	0.04561	0.01568	-0.02608	-0.00147	0.04833								1180.8	0.0318607	-0.00134304	-0.0468858	-0.0105774	0.0302501
1182.9	0.208	0.9011	0.8445	1.1376	3.3152		1182.9	0.06245	0.00743	-0.00961	-0.02217	0.07437								1182.9	0.0487007	-0.00959304	-0.0304158	-0.0312774	0.0562901
1185	0.1685	0.9342	0.8594	1.1549	3.3109		1185	0.0229	0.04047	0.00526	-0.00497	0.0695								1185	0.00915067	0.023447	-0.0155458	-0.0140774	0.0514201
1187.1	0.1854	0.9253	0.8477	1.1703	3.3098		1187.1	0.03974	0.03151	-0.00648	0.01034	0.06784								1187.1	0.0259907	0.014487	-0.0272858	0.00123262	0.0497601
1189.2	0.1814	0.9098	0.8296	1.1936	3.2881		1189.2	0.03568	0.01595	-0.02461	0.03354	0.04557								1189.2	0.0219307	-0.00107304	-0.0454158	0.0244326	0.0274901
1191.3	0.1637	0.9116	0.8702	1.1458	3.3081		1191.3	0.01792	0.0177	0.01596	-0.01436	0.06501								1191.3	0.00417067	0.000676957	-0.00484575	-0.0234674	0.0469301
1193.4	0.1347	0.9132	0.8434	1.156	3.2989		1193.4	-0.01113	0.01924	-0.01088	-0.00426	0.05525								1193.4	-0.0248793	0.00221696	-0.0316858	-0.0133674	0.0371701
1195.5	0.1602	0.8977	0.8337	1.1612	3.3046		1195.5	0.01431	0.00368	-0.02061	0.000847859	0.06038								1195.5	0.000560672	-0.013343	-0.0414158	-0.00825952	0.0423001
1197.6	0.1307	0.9098	0.8575	1.1475	3.2878		1197.6	-0.01525	0.01572	0.00315	-0.01295	0.04302								1197.6	-0.0289993	-0.00130304	-0.0176558	-0.0220574	0.0249401
1199.7	0.1342	0.9085	0.8669	1.1511	3.282		1199.7	-0.01181	0.01437	0.01252	-0.00945	0.03665								1199.7	-0.0255593	-0.00265304	-0.00828575	-0.0185574	0.0185701
1201.8	0.1184	0.9011	0.8502	1.1686	3.2889		1201.8	-0.02766	0.00691	-0.00421	0.00796	0.04299								1201.8	-0.0414093	-0.010113	-0.0250158	-0.00114738	0.0249101
1203.9	0.1629	0.871	0.8467	1.1651	3.2832		1203.9	0.01678	-0.02325	-0.00775	0.00436	0.03672								1203.9	0.00303067	-0.040273	-0.0285558	-0.00474738	0.0186401
1206	0.1557	0.9035	0.8331	1.1672	3.2778		1206	0.00952	0.00919	-0.02138	0.00636	0.03076								1206	-0.00422933	-0.00783304	-0.0421858	-0.00274738	0.0126801
1208.1	0.1586	0.8983	0.828	1.173	3.2855		1208.1	0.01236	0.00394	-0.02651	0.01207	0.0379								1208.1	-0.00138933	-0.013083	-0.0473158	0.00296262	0.0198201
1210.2	0.16	0.8867	0.855	1.1703	3.2883		1210.2	0.01371	-0.00772	0.000453934	0.00927	0.04013								1210.2	-3.93276e-05	-0.024743	-0.0203518	0.000162621	0.0220501
1212.3	0.1642	0.8584	0.8853	1.1532	3.266		1212.3	0.01785	-0.03608	0.03072	-0.00793	0.01727								1212.3	0.00410067	-0.053103	0.00991425	-0.0170374	-0.000809855
1214.4	0.1626	0.9061	0.8507	1.1538	3.2906		1214.4	0.01619	0.01156	-0.00391	-0.00742	0.0413								1214.4	0.00244067	-0.00546304	-0.0247158	-0.0165274	0.0232201
1216.5	0.153	0.8872	0.8794	1.1554	3.3006		1216.5	0.00653	-0.00739	0.02475	-0.00592	0.05074								1216.5	-0.00721933	-0.024413	0.00394425	-0.0150274	0.0326601
1218.6	0.2045	0.8972	0.8767	1.167	3.2969		1218.6	0.05798	0.00255	0.02202	0.00558	0.04647								1218.6	0.0442307	-0.014473	0.00121425	-0.00352738	0.0283901
1220.7	0.1785	0.8744	0.8534	1.1554	3.3275		1220.7	0.03192	-0.02031	-0.00131	-0.00611	0.07651								1220.7	0.0181707	-0.037333	-0.0221158	-0.0152174	0.0584301
1222.8	0.1779	0.8739	0.8575	1.1532	3.3001		1222.8	0.03126	-0.02087	0.00275	-0.00841	0.04854								1222.8	0.0175107	-0.037893	-0.0180558	-0.0175174	0.0304601
1224.9	0.1624	0.8725	0.8404	1.1483	3.282		1224.9	0.0157	-0.02232	-0.01438	-0.01341	0.02988								1224.9	0.00195067	-0.039343	-0.0351858	-0.0225174	0.0118001
1227	0.179	0.9066	0.8204	1.1414	3.2912		1227	0.03225	0.01172	-0.03441	-0.02041	0.03852								1227	0.0185007	-0.00530304	-0.0552158	-0.0295174	0.0204401
1229.1	0.1337	0.8954	0.8594	1.173	3.2895		1229.1	-0.01311	0.000459996	0.00455	0.0111	0.03625								1229.1	-0.0268593	-0.016563	-0.0162558	0.00199262	0.0181701
1231.2	0.1543	0.9032	0.8445	1.1785	3.2964		1231.2	0.00743	0.0082	-0.01038	0.0165	0.04259								1231.2	-0.00631933	-0.00882304	-0.0311858	0.00739262	0.0245101
1233.3	0.1476	0.9195	0.8637	1.1659	3.2969		1233.3	0.000674459	0.02444	0.00879	0.0038	0.04252								1233.3	-0.0130749	0.00741696	-0.0120158	-0.00530738	0.0244401
1235.4	0.1387	0.9098	0.8772	1.1856	3.2881		1235.4	-0.00828	0.01469	0.02225	0.02341	0.03316								1235.4	-0.0220293	-0.00233304	0.00144425	0.0143026	0.0150801
1237.5	0.1524	0.9211	0.875	1.1865	3.2632		1237.5	0.00536	0.02593	0.02002	0.02421	0.00769								1237.5	-0.00838933	0.00890696	-0.000785751	0.0151026	-0.0103899
1239.6	0.1385	0.9174	0.8656	1.1931	3.2637		1239.6	-0.0086	0.02217	0.01059	0.03071	0.00763								1239.6	-0.0223493	0.00514696	-0.0102158	0.0216026	-0.0104499
1241.7	0.1487	0.8833	0.8623	1.162	3.2935		1241.7	0.00154	-0.01199	0.00725	-0.000483996	0.03687								1241.7	-0.0122093	-0.029013	-0.0135558	-0.00959137	0.0187901
1243.8	0.1412	0.8573	0.8564	1.1571	3.2617		1243.8	-0.00601	-0.03804	0.00132	-0.00548	0.0045								1243.8	-0.0197593	-0.055063	-0.0194858	-0.0145874	-0.0135799
1245.9	0.1659	0.8912	0.8321	1.1549	3.2672		1245.9	0.01863	-0.0042	-0.02301	-0.00778	0.00944								1245.9	0.00488067	-0.021223	-0.0438158	-0.0168874	-0.00863986
1248	0.1747	0.8935	0.8442	1.1532	3.2566		1248	0.02737	-0.00196	-0.01095	-0.00957	-0.00173								1248	0.0136207	-0.018983	-0.0317558	-0.0186774	-0.0198099
1250.1	0.1914	0.887	0.8394	1.1648	3.2506		1250.1	0.04401	-0.00852	-0.01578	0.00193	-0.00829								1250.1	0.0302607	-0.025543	-0.0365858	-0.00717738	-0.0263699
1252.2	0.1809	0.8765	0.8496	1.1522	3.2686		1252.2	0.03346	-0.01907	-0.00562	-0.01077	0.00914								1252.2	0.0197107	-0.036093	-0.0264258	-0.0198774	-0.00893986
1254.3	0.1825	0.8849	0.8386	1.1511	3.2715		1254.3	0.035	-0.01073	-0.01665	-0.01197	0.01148								1254.3	0.0212507	-0.027753	-0.0374558	-0.0210774	-0.00659986
1256.4	0.1543	0.8775	0.8664	1.1571	3.3232		1256.4	0.00674	-0.01819	0.01112	-0.00606	0.06261								1256.4	-0.00700933	-0.035213	-0.00968575	-0.0151674	0.0445301
1258.5	0.1361	0.8927	0.8367	1.1557	3.2843		1258.5	-0.01152	-0.00305	-0.01862	-0.00756	0.02315								1258.5	-0.0252693	-0.020073	-0.0394258	-0.0166674	0.00507014
1260.6	0.1438	0.8702	0.831	1.1582	3.2792		1260.6	-0.00387	-0.0256	-0.02435	-0.00516	0.01749								1260.6	-0.0176193	-0.042623	-0.0451558	-0.0142674	-0.000589855
1262.7	0.1613	0.8985	0.8377	1.1563	3.2763		1262.7	0.01357	0.00264	-0.01768	-0.00715	0.01402								1262.7	-0.000179328	-0.014383	-0.0384858	-0.0162574	-0.00405986
1264.8	0.1812	0.8872	0.8567	1.1686	3.3204		1264.8	0.03341	-0.00872	0.00128	0.00505	0.05756								1264.8	0.0196607	-0.025743	-0.0195258	-0.00405738	0.0394801
1266.9	0.1557	0.8731	0.838	1.1906	3.2901		1266.9	0.00785	-0.02288	-0.01745	0.02695	0.02669								1266.9	-0.00589933	-0.039903	-0.0382558	0.0178426	0.00861014
1269	0.1433	0.8694	0.8494	1.1854	3.2829		1269	-0.0046	-0.02663	-0.00608	0.02166	0.01893								1269	-0.0183493	-0.043653	-0.0268858	0.0125526	0.000850145
1271.1	0.1535	0.8904	0.848	1.1733	3.2898		1271.1	0.00554	-0.00569	-0.00752	0.00946	0.02526								1271.1	-0.00820933	-0.022713	-0.0283258	0.000352621	0.00718014
1273.2	0.1181	0.8901	0.8504	1.1203	3.3064		1273.2	-0.02992	-0.00605	-0.00515	-0.04364	0.0413								1273.2	-0.0436693	-0.023073	-0.0259558	-0.0527474	0.0232201
1275.3	0.1489	0.8904	0.845	1.1379	3.2964		1275.3	0.000824203	-0.00581	-0.01058	-0.02613	0.03073								1275.3	-0.0129251	-0.022833	-0.0313858	-0.0352374	0.0126501
1277.4	0.1506	0.8838	0.8259	1.1585	3.2943		1277.4	0.00247	-0.01246	-0.02972	-0.00563	0.02807								1277.4	-0.0112793	-0.029483	-0.0505258	-0.0147374	0.00999014
1279.5	0.1575	0.8867	0.8421	1.1568	3.2766		1279.5	0.00931	-0.00962	-0.01355	-0.00743	0.00981								1279.5	-0.00443933	-0.026643	-0.0343558	-0.0165374	-0.00826986
1281.6	0.1428	0.9127	0.848	1.1911	3.2935		1281.6	-0.00545	0.01632	-0.00768	0.02677	0.02614								1281.6	-0.0191993	-0.000703043	-0.0284858	0.0176626	0.00806014
1283.7	0.1718	0.9261	0.8596	1.1818	3.3081		1283.7	0.02349	0.02966	0.00388	0.01738	0.04018								1283.7	0.00974067	0.012637	-0.0169258	0.00827262	0.0221001
1285.8	0.1701	0.9465	0.8453	1.1837	3.2717		1285.8	0.02174	0.05001	-0.01045	0.01918	0.00321								1285.8	0.00799067	0.032987	-0.0312558	0.0100726	-0.0148699
1287.9	0.1683	0.9114	0.8307	1.167	3.2466		1287.9	0.01988	0.01485	-0.02508	0.00238	-0.02245								1287.9	0.00613067	-0.00217304	-0.0458858	-0.00672738	-0.0405299
1290	0.1618	0.8972	0.8477	1.201	3.2975		1290	0.01332	0.000591828	-0.00812	0.03629	0.02788								1290	-0.000429328	-0.0164312	-0.0289258	0.0271826	0.00980014
1292.1	0.1731	0.9106	0.8434	1.1876	3.2818		1292.1	0.02456	0.01393	-0.01245	0.02279	0.01162								1292.1	0.0108107	-0.00309304	-0.0332558	0.0136826	-0.00645986
1294.2	0.1667	0.9203	0.8804	1.1851	3.2743		1294.2	0.01811	0.02358	0.02452	0.02019	0.00356								1294.2	0.00436067	0.00655696	0.00371425	0.0110826	-0.0145199
1296.3	0.1237	0.9187	0.8688	1.167	3.2901		1296.3	-0.02495	0.02192	0.01288	0.002	0.01879								1296.3	-0.0386993	0.00489696	-0.00792575	-0.00710738	0.000710145
1298.4	0.1224	0.8791	0.8442	1.17	3.2783		1298.4	-0.02631	-0.01774	-0.01175	0.0049	0.00643								1298.4	-0.0400593	-0.034763	-0.0325558	-0.00420738	-0.0116499
1300.5	0.1449	0.8846	0.8372	1.1996	3.2483		1300.5	-0.00387	-0.0123	-0.01878	0.0344	-0.02414								1300.5	-0.0176193	-0.029323	-0.0395858	0.0252926	-0.0422199
1302.6	0.1519	0.8988	0.8569	1.1917	3.2417		1302.6	0.00308	0.00185	0.000881733	0.02641	-0.0313								1302.6	-0.0106693	-0.015173	-0.019924	0.0173026	-0.0493799
1304.7	0.1447	0.9108	0.8523	1.1766	3.2617		1304.7	-0.00418	0.01379	-0.00375	0.01121	-0.01187								1304.7	-0.0179293	-0.00323304	-0.0245558	0.00210262	-0.0299499
1306.8	0.1318	0.882	0.8561	1.1598	3.2566		1306.8	-0.01714	-0.01507	1.48152e-05	-0.00569	-0.01753								1306.8	-0.0308893	-0.032093	-0.0207909	-0.0147974	-0.0356099
1308.9	0.1422	0.8859	0.8367	1.1826	3.3006		1308.9	-0.0068	-0.01123	-0.01942	0.01702	0.0259								1308.9	-0.0205493	-0.028253	-0.0402258	0.00791262	0.00782014
1311	0.1401	0.8969	0.8694	1.1651	3.2984		1311	-0.00895	-0.000283402	0.01325	-0.000581779	0.02314								1311	-0.0226993	-0.0173064	-0.00755575	-0.00968916	0.00506014
1313.1	0.1803	0.8864	0.8402	1.1711	3.3098		1313.1	0.03119	-0.01084	-0.01599	0.00532	0.03398								1313.1	0.0174407	-0.027863	-0.0367958	-0.00378738	0.0159001
1315.2	0.1645	0.9035	0.8688	1.1335	3.2964		1315.2	0.01533	0.0062	0.01258	-0.03238	0.02001								1315.2	0.00158067	-0.010823	-0.00822575	-0.0414874	0.00193014
1317.3	0.1396	0.8904	0.8648	1.1543	3.2989		1317.3	-0.00963	-0.00696	0.00855	-0.01167	0.02195								1317.3	-0.0233793	-0.023983	-0.0122558	-0.0207774	0.00387014
1319.4	0.1315	0.8849	0.8291	1.1867	3.2775		1319.4	-0.01778	-0.01251	-0.02719	0.02063	-1.74242e-05								1319.4	-0.0315293	-0.029533	-0.0479958	0.0115226	-0.0180973
1321.5	0.1277	0.8893	0.854	1.1711	3.2798		1321.5	-0.02164	-0.00817	-0.00232	0.00493	0.00172								1321.5	-0.0353893	-0.025193	-0.0231258	-0.00417738	-0.0163599
1323.6	0.1543	0.9166	0.8702	1.1681	3.2732		1323.6	0.0049	0.01907	0.01385	0.00184	-0.00545								1323.6	-0.00884933	0.00204696	-0.00695575	-0.00726738	-0.0235299
1325.7	0.1412	0.8964	0.8413	1.1552	3.2789		1325.7	-0.00826	-0.00119	-0.01509	-0.01116	-0.000310606								1325.7	-0.0220093	-0.018213	-0.0358958	-0.0202674	-0.0183905
1327.8	0.121	0.9245	0.8367	1.1664	3.2989		1327.8	-0.02851	0.02686	-0.01972	-5.6999e-05	0.01913								1327.8	-0.0422593	0.00983696	-0.0405258	-0.00916438	0.00105014
1329.9	0.1184	0.9213	0.818	1.1516	3.2826		1329.9	-0.03117	0.0236	-0.03845	-0.01495	0.00226								1329.9	-0.0449193	0.00657696	-0.0592558	-0.0240574	-0.0158199
1332	0.1213	0.9226	0.814	1.1881	3.2792		1332	-0.02833	0.02484	-0.04249	0.02145	-0.0017								1332	-0.0420793	0.00781696	-0.0632958	0.0123426	-0.0197799
1334.1	0.1307	0.9229	0.8259	1.1593	3.2592		1334.1	-0.01899	0.02508	-0.03062	-0.00745	-0.02227								1334.1	-0.0327393	0.00805696	-0.0514258	-0.0165574	-0.0403499
1336.2	0.113	0.9339	0.8421	1.1516	3.2886		1336.2	-0.03674	0.03603	-0.01445	-0.01524	0.00657								1336.2	-0.0504893	0.019007	-0.0352558	-0.0243474	-0.0115099
1338.3	0.1508	0.9077	0.8734	1.167	3.3149		1338.3	0.000998819	0.00977	0.01681	5.84885e-05	0.0323								1338.3	-0.0127505	-0.00725304	-0.00399575	-0.00904889	0.0142201
1340.4	0.131	0.909	0.8545	1.1785	3.2992		1340.4	-0.01886	0.01101	-0.00212	0.01146	0.01604								1340.4	-0.0326093	-0.00601304	-0.0229258	0.00235262	-0.00203986
1342.5	0.1457	0.9098	0.8621	1.2049	3.2798		1342.5	-0.00422	0.01175	0.00545	0.03776	-0.00393								1342.5	-0.0179693	-0.00527304	-0.0153558	0.0286526	-0.0220099
1344.6	0.1779	0.9087	0.8302	1.1634	3.317		1344.6	0.02793	0.0106	-0.02649	-0.00383	0.03271								1344.6	0.0141807	-0.00642304	-0.0472958	-0.0129374	0.0146301
1346.7	0.1648	0.8867	0.8469	1.1802	3.3347		1346.7	0.01477	-0.01146	-0.00982	0.01287	0.04985								1346.7	0.00102067	-0.028483	-0.0306258	0.00376262	0.0317701
1348.8	0.1516	0.9082	0.888	1.1804	3.3358		1348.8	0.00151	0.00998	0.03125	0.01297	0.05038								1348.8	-0.0122393	-0.00704304	0.0104442	0.00386262	0.0323001
1350.9	0.1581	0.9182	0.8653	1.164	3.3261		1350.9	0.00795	0.01992	0.00851	-0.00352	0.04012								1350.9	-0.00579933	0.00289696	-0.0122958	-0.0126274	0.0220401
1353	0.1726	0.8988	0.8434	1.181	3.2909		1353	0.0224	0.000466137	-0.01342	0.01338	0.00435								1353	0.00865067	-0.0165569	-0.0342258	0.00427262	-0.0137299
1355.1	0.16	0.904	0.8653	1.1694	3.2966		1355.1	0.00974	0.00561	0.00845	0.00168	0.00949								1355.1	-0.00400933	-0.011413	-0.0123558	-0.00742738	-0.00858986
1357.2	0.1642	0.9087	0.8591	1.1546	3.2881		1357.2	0.01388	0.01025	0.00221	-0.01321	0.000423485								1357.2	0.000130672	-0.00677304	-0.0185958	-0.0223174	-0.0176564
1359.3	0.1455	0.9163	0.875	1.1362	3.2795		1359.3	-0.00488	0.01779	0.01808	-0.03171	-0.00874								1359.3	-0.0186293	0.000766957	-0.00272575	-0.0408174	-0.0268199
1361.4	0.1546	0.8862	0.8767	1.1307	3.2649		1361.4	0.00417	-0.01236	0.01974	-0.03731	-0.02391								1361.4	-0.00957933	-0.029383	-0.00106575	-0.0464174	-0.0419899
1363.5	0.1532	0.9059	0.8669	1.1456	3.2898		1363.5	0.00271	0.00728	0.00991	-0.0225	0.000430303								1363.5	-0.0110393	-0.00974304	-0.0108958	-0.0316074	-0.0176496
1365.6	0.1235	0.9242	0.8596	1.1494	3.3273		1365.6	-0.02705	0.02552	0.00258	-0.0188	0.03737								1365.6	-0.0407993	0.00849696	-0.0182258	-0.0279074	0.0192901
1367.7	0.1345	0.9001	0.8721	1.1491	3.3098		1367.7	-0.01611	0.00136	0.01504	-0.0192	0.0193								1367.7	-0.0298593	-0.015663	-0.00576575	-0.0283074	0.00122014
1369.8	0.1315	0.8744	0.8523	1.1491	3.2986		1369.8	-0.01916	-0.02439	-0.00479	-0.0193	0.00754								1369.8	-0.0329093	-0.041413	-0.0255958	-0.0284074	-0.0105399
1371.9	0.1726	0.9001	0.8577	1.1837	3.3121		1371.9	0.02188	0.00125	0.000577583	0.01521	0.02047								1371.9	0.00813067	-0.015773	-0.0202282	0.00610262	0.00239014
1374	0.1822	0.8857	0.8515	1.1587	3.2923		1374	0.03142	-0.01321	-0.00566	-0.00989	0.000108333								1374	0.0176707	-0.030233	-0.0264658	-0.0189974	-0.0179715
1376.1	0.1677	0.8773	0.8737	1.1692	3.2861		1376.1	0.01686	-0.02167	0.01651	0.000514243	-0.00666								1376.1	0.00311067	-0.038693	-0.00429575	-0.00859314	-0.0247399
1378.2	0.1436	0.9087	0.8669	1.1612	3.2966		1378.2	-0.00729	0.00968	0.00968	-0.00758	0.00328								1378.2	-0.0210393	-0.00734304	-0.0111258	-0.0166874	-0.0147999
1380.3	0.1589	0.9187	0.8596	1.1741	3.2878		1380.3	0.00795	0.01962	0.00234	0.00522	-0.00608								1380.3	-0.00579933	0.00259696	-0.0184658	-0.00388738	-0.0241599
1382.4	0.15	0.915	0.8477	1.1802	3.2863		1382.4	-0.00101	0.01586	-0.00959	0.01122	-0.00815								1382.4	-0.0147593	-0.00116304	-0.0303958	0.00211262	-0.0262299
1384.5	0.1334	0.9032	0.8613	1.1747	3.2852		1384.5	-0.01767	0.004	0.00398	0.00563	-0.00981								1384.5	-0.0314193	-0.013023	-0.0168258	-0.00347738	-0.0278899
1386.6	0.1637	0.9122	0.8245	1.1714	3.3044		1386.6	0.01258	0.01295	-0.03286	0.00223	0.00882								1386.6	-0.00116933	-0.00407304	-0.0536658	-0.00687738	-0.00925986
1388.7	0.1651	0.9116	0.8237	1.1791	3.2666		1388.7	0.01392	0.01229	-0.03369	0.00983	-0.02954								1388.7	0.000170672	-0.00473304	-0.0544958	0.000722621	-0.0476199
1390.8	0.1382	0.9098	0.8523	1.1582	3.2943		1390.8	-0.01304	0.01043	-0.00512	-0.01116	-0.00241								1390.8	-0.0267893	-0.00659304	-0.0259258	-0.0202674	-0.0204899
1392.9	0.139	0.9101	0.8669	1.1637	3.2861		1392.9	-0.0123	0.01067	0.00944	-0.00576	-0.01117								1392.9	-0.0260493	-0.00635304	-0.0113658	-0.0148674	-0.0292499
1395	0.1269	0.9205	0.8569	1.1991	3.2946		1395	-0.02445	0.02102	-0.000590467	0.02954	-0.00324								1395	-0.0381993	0.00399696	-0.0213962	0.0204326	-0.0213199
1397.1	0.1457	0.9253	0.8726	1.1906	3.2984		1397.1	-0.00571	0.02576	0.01508	0.02095	0								1397.1	-0.0194593	0.00873696	-0.00572575	0.0118426	-0.0180799
