# Supplementary material for: Photosynthetic sea slugs induce protective changes to the light reactions of the chloroplasts they steal from algae
Source: eLife. 2020 Oct 20;9:e57389. doi: 10.7554/eLife.57389 (PMC7679141; doi:10.7554/eLife.57389)
Supplement: Figure 4—source data 1. [file elife-57389-fig4-data1.xlsx]

## Sheet: Fig4A_timida
				Original data (P515 deltaI/I x10³)															After slope correction in Origin (baseline subtraction tool)															Zero levels															Zero levels set
Time (ms)	E timida 1	E timida 2	E timida 3	E timida 4	E timida 5	E timida 6	E timida 7	E timida 8	E timida 9	E timida 10	E timida 11	E timida 12	E timida 13		Time (ms)	E timida 1	E timida 2	E timida 3	E timida 4	E timida 5	E timida 6	E timida 7	E timida 8	E timida 9	E timida 10	E timida 11	E timida 12	E timida 13		E timida 1	E timida 2	E timida 3	E timida 4	E timida 5	E timida 6	E timida 7	E timida 8	E timida 9	E timida 10	E timida 11	E timida 12	E timida 13		Time (ms)	E timida 1	E timida 2	E timida 3	E timida 4	E timida 5
-198.9	134.899	205.152	213.675	52.8539	13.6668	-163.381	246.133	280.66	590.413	595.259	532.534	571.57	202.956		-198.9	1.0266	-0.33795	0	-0.15586	-0.21158	0.76313	-4.84865	0.1565	3.41228	-3.73043	-1.4371	2.11658	1.03612		0.0726555	0.335418	0.0759935	0.308825	0.831054	0.0133058	1.76957	-0.190047	-0.0439052	0.895147	0.744633	0.80124	0.32191		-198.9	0.953945	-0.673368	-0.0759935	-0.464685	-1.04263
-196.8	134.899	205.152	213.287	53.0755	15.3576	-164.211	250.792	281.17	589.408	598.238	539.913	571.57	202.4		-196.8	1.02891	-0.3356	-0.38641	0.07606	1.48652	-0.05765	-0.20217	0.6715	2.41798	-0.72566	5.96117	2.13178	0.4894																-196.8	0.956255	-0.671018	-0.462403	-0.232765	0.655466
-194.7	133.238	205.376	213.967	52.9647	14.6531	-164.211	248.462	280.49	584.378	603.202	537.453	567.034	202.215		-194.7	-0.62958	-0.10955	0.29509	-0.02443	0.78932	-0.04903	-2.54378	-0.00279	-2.59962	4.26491	3.52054	-2.38923	0.31327																-194.7	-0.702235	-0.444968	0.219097	-0.333255	-0.0417344
-192.6	134.161	205.152	213.675	53.2971	13.5259	-166.699	244.58	280.49	585.384	601.713	530.074	567.034	201.659		-192.6	0.29543	-0.33089	0.00568	0.31829	-0.33058	-2.5284	-6.4382	0.00251	-1.58222	2.80148	-3.83959	-2.37404	-0.23346																-192.6	0.222775	-0.666308	-0.0703135	0.00946463	-1.16163
-190.5	134.345	205.6	214.064	52.8539	13.9486	-162.967	249.239	281.17	588.402	597.245	534.379	573.271	201.103		-190.5	0.48224	0.11886	0.39587	-0.11459	0.09943	1.21232	-1.79171	0.68742	1.44669	-1.64075	0.48398	3.87845	-0.78028																-190.5	0.409585	-0.216558	0.319877	-0.423415	-0.731624
-188.4	134.899	205.6	213.481	53.0755	14.3713	-162.137	255.45	280.49	588.905	595.755	534.994	573.838	201.844		-188.4	1.03815	0.12121	-0.18463	0.11732	0.52943	2.05025	4.40757	0.01312	1.96109	-3.10418	1.11805	4.46074	-0.02961																-188.4	0.965495	-0.214208	-0.260623	-0.191505	-0.301624
-186.3	133.238	205.6	214.161	52.5215	13.8077	-165.04	251.568	279.981	585.887	600.72	534.994	567.601	202.215		-186.3	-0.62034	0.12356	0.49676	-0.42636	-0.02687	-0.84383	0.51316	-0.49117	-1.04481	1.88649	1.13712	-1.76147	0.35036																-186.3	-0.692995	-0.211858	0.420767	-0.735185	-0.857924
-184.2	133.238	205.823	213.481	52.9647	14.0895	-164.625	249.239	281.34	585.887	599.231	530.689	563.632	201.103		-184.2	-0.61803	0.34971	-0.18084	0.02716	0.26223	-0.42051	-1.82836	0.87323	-1.03331	0.42306	-3.14841	-5.71548	-0.75246																-184.2	-0.690685	0.0142924	-0.256833	-0.281665	-0.568824
-182.1	133.607	206.271	213.869	52.2999	14.0895	-165.04	257.78	279.981	587.396	602.209	536.838	568.168	202.4		-182.1	-0.24662	0.79947	0.20935	-0.62733	0.26953	-0.82658	6.70033	-0.48056	0.48689	3.42783	3.02006	-1.16408	0.55431																-182.1	-0.319275	0.464052	0.133357	-0.936155	-0.561524
-180	133.976	205.152	213.967	52.8539	13.5259	-165.04	250.792	279.641	585.887	600.72	533.149	573.838	202.4		-180	0.12469	-0.31678	0.30834	-0.06301	-0.28676	-0.81796	-0.29989	-0.81506	-1.01031	1.9644	-0.65047	4.52151	0.56358																-180	0.0520345	-0.652198	0.232347	-0.371835	-1.11781
-177.9	133.792	206.047	213.384	53.1863	13.5259	-165.04	250.792	280.49	587.396	602.209	534.379	564.766	201.288		-177.9	-0.0575	0.58047	-0.27226	0.2797	-0.27946	-0.80934	-0.3121	0.03965	0.50989	3.47977	0.5984	-4.5359	-0.53924																-177.9	-0.130155	0.245052	-0.348253	-0.0291254	-1.11051
-175.8	133.423	205.6	213.384	52.8539	14.3713	-163.796	253.121	279.641	586.893	599.727	534.994	571.57	202.215		-175.8	-0.42429	0.13532	-0.27037	-0.04238	0.57324	0.44329	2.00498	-0.80445	0.0185	1.02334	1.23247	2.28369	0.39673																-175.8	-0.496945	-0.200098	-0.346363	-0.351205	-0.257814
-173.7	133.976	205.152	213.869	53.2971	13.6668	-162.552	250.792	279.131	589.408	596.748	533.149	572.704	201.659		-173.7	0.13162	-0.30973	0.21692	0.41114	-0.12396	1.69591	-0.33653	-1.30884	2.5445	-1.92939	-0.59326	3.43298	-0.15																-173.7	0.0589645	-0.645148	0.140927	0.102315	-0.955014
-171.6	134.345	205.6	213.967	53.6295	14.5122	-164.625	255.45	279.811	587.899	597.245	530.074	570.436	201.844		-171.6	0.50303	0.14002	0.31592	0.75385	0.72875	-0.36876	4.30985	-0.62394	1.0473	-1.40702	-3.64889	1.18007	0.04458																-171.6	0.430375	-0.195398	0.239927	0.445025	-0.102304
-169.5	134.161	206.718	213.481	52.9647	14.6531	-164.211	253.121	280.83	584.881	600.223	531.304	563.632	202.215		-169.5	0.32084	1.26098	-0.16759	0.09937	0.87695	0.05446	1.96834	0.40067	-1.9587	1.59775	-2.40001	-5.60913	0.42455																-169.5	0.248185	0.925562	-0.243583	-0.209455	0.0458956
-167.4	133.792	205.6	213.481	53.2971	14.6531	-161.308	260.109	280.32	583.373	597.245	534.994	572.704	203.327		-167.4	-0.04595	0.14473	-0.16569	0.44209	0.88425	2.96588	8.94412	-0.10373	-3.4559	-1.35508	1.30876	3.47856	1.54592																-167.4	-0.118605	-0.190688	-0.241683	0.133265	0.0531956
-165.3	133.607	205.152	213.481	53.7403	14.0895	-162.552	250.792	280.32	585.887	596.252	533.764	569.869	202.586		-165.3	-0.22814	-0.30032	-0.1638	0.8956	0.32795	1.73041	-0.38539	-0.09842	-0.9298	-2.32201	0.09793	0.65855	0.8138																-165.3	-0.300795	-0.635738	-0.239793	0.586775	-0.503104
-163.2	133.792	205.6	212.802	52.6323	14.2304	-162.137	255.45	280.83	589.408	601.216	533.764	573.838	200.917		-163.2	-0.04133	0.14943	-0.84151	-0.20208	0.47615	2.15373	4.261	0.41659	2.60201	2.66856	0.117	4.64304	-0.84503																-163.2	-0.113985	-0.185988	-0.917503	-0.510905	-0.354904
-161.1	133.607	204.929	213.481	53.1863	15.0758	-168.357	253.897	282.019	584.881	601.216	532.534	565.9	201.844		-161.1	-0.22352	-0.51932	-0.16001	0.36224	1.32886	-4.05775	2.69588	1.61119	-1.91269	2.69453	-1.09383	-3.28027	0.09094																-161.1	-0.296175	-0.854738	-0.236003	0.0534146	0.497806
-159	133.607	205.6	213.481	53.2971	14.3713	-162.137	257.003	281	584.378	601.216	531.919	574.405	203.142		-159	-0.22121	0.15414	-0.15812	0.48335	0.63166	2.17098	5.78947	0.5971	-2.40409	2.7205	-1.68966	5.24042	1.39772																-159	-0.293865	-0.181278	-0.234113	0.174525	-0.199394
-156.9	134.161	204.705	213.675	52.9647	13.6668	-167.113	252.344	279.811	588.402	602.209	530.074	568.735	202.586		-156.9	0.3347	-0.73831	0.03787	0.16127	-0.06554	-2.7965	1.11855	-0.5868	1.63071	3.73947	-3.51539	-0.41468	0.85089																-156.9	0.262045	-1.07373	-0.0381235	-0.147555	-0.896594
-154.8	133.238	205.6	213.967	53.4079	14.3713	-160.479	253.121	281.17	589.91	595.755	534.379	568.168	202.215		-154.8	-0.58569	0.15884	0.33107	0.61479	0.64626	3.84693	1.88284	0.77761	3.15091	-2.68866	0.80818	-0.96659	0.48946																-154.8	-0.658345	-0.176578	0.255077	0.305965	-0.184794
-152.7	133.423	205.6	213.967	52.9647	14.2304	-161.723	254.674	279.641	582.87	597.741	537.453	568.168	203.327		-152.7	-0.39888	0.16119	0.33296	0.1819	0.51266	2.61155	3.42352	-0.74609	-3.87829	-0.67679	3.90195	-0.9514	1.61084																-152.7	-0.471535	-0.174228	0.256967	-0.126925	-0.318394
-150.6	133.238	205.6	213.384	52.9647	14.794	-167.113	257.003	279.641	585.887	601.216	533.149	569.869	202.4		-150.6	-0.58107	0.16354	-0.24765	0.19222	1.08357	-2.77063	5.74061	-0.74078	-0.84929	2.82438	-0.38348	0.76489	0.69341																-150.6	-0.653725	-0.171878	-0.323643	-0.116605	0.252516
-148.5	134.53	206.271	213.772	52.5215	14.0895	-162.137	257.78	279.811	584.881	600.72	536.223	571.003	201.844		-148.5	0.71304	0.8371	0.14255	-0.24066	0.38637	2.2141	6.50489	-0.56558	-1.84368	2.35395	2.71019	1.91418	0.14658																-148.5	0.640385	0.501682	0.0665565	-0.549485	-0.444684
-146.4	133.607	206.047	213.967	52.6323	14.2304	-166.699	253.897	280.66	585.887	596.252	536.838	568.735	200.732		-146.4	-0.20735	0.61575	0.33864	-0.11955	0.53457	-2.33868	2.61038	0.28913	-0.82628	-2.08828	3.34426	-0.33873	-0.95624																-146.4	-0.280005	0.280332	0.262647	-0.428375	-0.296484
-144.3	134.345	204.481	213.287	52.8539	14.3713	-162.137	248.462	278.961	588.905	603.202	534.994	571.57	203.883		-144.3	0.53306	-0.948	-0.33906	0.11237	0.68277	2.23134	-2.83694	-1.40447	2.20262	4.88818	1.51853	2.51156	2.20393																-144.3	0.460405	-1.28342	-0.415053	-0.196455	-0.148284
-142.2	133.607	206.047	213.869	52.7431	14.2304	-162.552	251.568	280.15	582.87	595.259	534.994	572.704	202.4		-142.2	-0.20273	0.62045	0.24533	0.01189	0.54918	1.82527	0.25665	-0.20986	-3.82078	-3.02925	1.5376	3.66086	0.7305																-142.2	-0.275385	0.285032	0.169337	-0.296935	-0.281874
-140.1	133.238	206.718	213.481	52.6323	15.9212	-163.796	253.121	281.17	585.384	600.223	539.298	566.467	202.771		-140.1	-0.56952	1.2939	-0.14108	-0.0886	2.24728	0.58989	1.79733	0.81474	-1.29468	1.96132	5.86117	-2.56135	1.11048																-140.1	-0.642175	0.958482	-0.217073	-0.397425	1.41623
-138	133.792	205.6	214.355	53.2971	14.5122	-166.284	254.674	279.641	589.408	596.252	535.609	568.168	201.103		-138	-0.01361	0.17766	0.73452	0.58652	0.84558	-1.88949	3.33802	-0.70895	2.74002	-1.98441	2.19064	-0.84506	-0.54845																-138	-0.0862655	-0.157758	0.658527	0.277695	0.0145256
-135.9	134.714	206.047	213.384	53.4079	14.5122	-167.943	251.568	278.961	584.881	602.706	530.074	566.467	202.956		-135.9	0.9114	0.62751	-0.23439	0.70764	0.85288	-3.53956	0.22	-1.38325	-1.77468	4.49556	-3.32469	-2.53097	1.31432																-135.9	0.838745	0.292092	-0.310383	0.398815	0.0218256
-133.8	134.161	206.495	213.481	52.5215	14.3713	-168.772	250.015	281.34	589.91	598.734	538.683	569.302	202.03		-133.8	0.36011	1.07726	-0.1354	-0.16845	0.71928	-4.36034	-1.34511	1.00056	3.26593	0.54983	5.30348	0.31942	0.3969																-133.8	0.287455	0.741842	-0.211393	-0.477275	-0.111774
-131.7	133.976	205.152	213.869	53.1863	13.9486	-166.699	257.78	278.282	586.39	599.231	534.994	577.241	202.771		-131.7	0.17782	-0.26269	0.2548	0.50667	0.30389	-2.27831	6.40717	-2.05214	-0.24287	1.0723	1.63295	8.27311	1.14757																-131.7	0.105165	-0.598108	0.178807	0.197845	-0.527164
-129.6	134.161	206.047	213.772	52.6323	14.3713	-163.796	259.332	278.961	586.893	600.223	531.304	574.405	202.771		-129.6	0.36473	0.63456	0.15959	-0.03701	0.73389	0.63301	7.94776	-1.36733	0.27153	2.09117	-2.03768	5.45311	1.15684																-129.6	0.292075	0.299142	0.0835965	-0.345835	-0.0971644
-127.5	133.423	206.718	213.869	53.1863	15.2167	-163.796	253.121	279.301	587.899	598.238	533.149	569.302	201.659		-127.5	-0.37116	1.30802	0.25858	0.5273	1.58659	0.64163	1.72404	-1.02223	1.28883	0.13134	-0.17371	0.365	0.05402																-127.5	-0.443815	0.972602	0.182587	0.218475	0.755536
-125.4	134.161	205.6	213.967	53.2971	14.9349	-164.211	250.792	279.301	588.402	599.231	531.304	565.9	201.474		-125.4	0.36935	0.19177	0.35758	0.64842	1.31209	0.23556	-0.61747	-1.01692	1.80323	1.15021	-1.99954	-3.02201	-0.12211																-125.4	0.296695	-0.143648	0.281587	0.339595	0.481036
-123.3	134.161	205.823	213.384	52.6323	14.5122	-163.381	253.121	280.15	585.887	596.252	534.379	573.271	202.215		-123.3	0.37166	0.41792	-0.22303	-0.00606	0.89669	1.07358	1.69961	-0.16212	-0.69977	-1.80262	1.09423	4.36458	0.62856																-123.3	0.299005	0.0825024	-0.299023	-0.314885	0.0656356
-121.2	134.161	206.271	213.481	52.5215	15.0758	-162.967	248.462	280.32	585.887	599.231	533.149	571.003	202.215		-121.2	0.37397	0.86767	-0.12403	-0.10655	1.4676	1.4969	-2.9713	0.01299	-0.68827	1.20215	-0.1165	2.11167	0.63784																-121.2	0.301315	0.532252	-0.200023	-0.415375	0.636546
-119.1	134.345	207.166	213.578	52.6323	16.6256	-164.211	246.133	279.301	586.893	600.223	534.379	570.436	201.659		-119.1	0.56078	1.76492	-0.02514	0.01457	3.0247	0.26143	-5.31281	-1.001	0.32904	2.22102	1.13237	1.55986	0.09111																-119.1	0.488125	1.4295	-0.101133	-0.294255	2.19365
-117	134.161	206.495	213.967	53.1863	14.794	-166.699	248.462	280.49	586.39	596.748	531.919	570.436	202.586		-117	0.37859	1.09607	0.36515	0.57888	1.2004	-2.21795	-2.99573	0.1935	-0.16236	-1.22821	-1.30826	1.57505	1.02708																-117	0.305935	0.760652	0.289157	0.270055	0.369346
-114.9	133.976	204.705	213.384	52.5215	14.0895	-167.113	252.344	280.66	588.402	600.72	536.838	570.436	202.03		-114.9	0.1963	-0.69127	-0.21545	-0.0756	0.5032	-2.62402	0.87426	0.36871	1.86074	2.76946	3.63031	1.59025	0.48036																-114.9	0.123645	-1.02669	-0.291443	-0.384425	-0.327854
-112.8	133.607	204.929	213.578	52.8539	14.0895	-163.381	251.568	280.32	584.881	598.238	536.223	565.333	202.215		-112.8	-0.17039	-0.46522	-0.01946	0.26712	0.51051	1.1167	0.08564	0.03421	-1.64816	0.31313	3.03438	-3.49786	0.67493																-112.8	-0.243045	-0.800638	-0.0954535	-0.0417054	-0.320544
-110.7	133.607	205.152	213.384	53.1863	14.6531	-163.381	251.568	279.641	587.396	598.238	535.609	568.735	202.586		-110.7	-0.16808	-0.23917	-0.21167	0.60983	1.08141	1.12532	0.07343	-0.63998	0.87794	0.3391	2.43855	-0.08047	1.0549																-110.7	-0.240735	-0.574588	-0.287663	0.301005	0.250356
-108.6	133.976	204.929	214.258	53.1863	14.6531	-165.04	251.568	278.621	586.39	594.266	536.838	575.54	201.103		-108.6	0.20323	-0.46052	0.66393	0.62015	1.08871	-0.52475	0.06121	-1.65408	-0.11636	-3.60663	3.68752	6.73912	-0.41862																-108.6	0.130575	-0.795938	0.587937	0.311325	0.257656
-106.5	133.423	206.047	213.675	52.9647	14.6531	-165.455	258.556	279.641	585.384	598.238	531.304	569.302	202.215		-106.5	-0.34806	0.66043	0.08332	0.40887	1.09601	-0.93083	7.037	-0.62937	-1.11065	0.39104	-1.82791	0.51691	0.70275																-106.5	-0.420715	0.325012	0.00732653	0.100045	0.264956
-104.4	133.792	206.495	213.772	52.8539	15.3576	-166.699	252.344	279.981	588.402	604.195	528.844	568.168	201.474		-104.4	0.02335	1.11019	0.18232	0.30838	1.80781	-2.16621	0.81318	-0.28427	1.91825	6.37451	-4.26854	-0.602	-0.02938																-104.4	-0.0493055	0.774772	0.106327	-0.000445368	0.976756
-102.3	133.053	205.376	213.384	53.1863	14.6531	-164.625	254.674	279.471	583.373	601.216	531.919	573.271	201.474		-102.3	-0.71254	-0.00606	-0.20409	0.6511	1.11062	-0.08418	3.13037	-0.78866	-3.09935	3.42168	-1.17477	4.5165	-0.0201																-102.3	-0.785195	-0.341478	-0.280083	0.342275	0.279566
-100.2	133.423	205.376	212.802	52.6323	14.0895	-163.381	254.674	280.15	583.373	598.734	534.379	568.735	201.844		-100.2	-0.34113	-0.00371	-0.7847	0.10742	0.55432	1.16844	3.11815	-0.10376	-3.08785	0.96535	1.304	-0.00451	0.35987																-100.2	-0.413785	-0.339128	-0.860693	-0.201405	-0.276734
-98.1	134.53	206.495	213.093	53.1863	14.3713	-161.723	246.909	278.961	586.39	595.259	531.304	567.601	201.474		-98.1	0.76848	1.11724	-0.4916	0.67173	0.84342	2.83577	-4.65856	-1.28775	-0.05885	-2.48388	-1.75163	-1.12342	-0.00156																-98.1	0.695825	0.781822	-0.567593	0.362905	0.0123656
-96	133.792	205.152	213.481	52.9647	14.794	-165.455	256.227	279.131	583.373	597.245	530.689	569.869	201.659		-96	0.03259	-0.22271	-0.10131	0.46045	1.27342	-0.88771	4.64662	-1.11255	-3.06485	-0.47211	-2.34746	1.15987	0.19312																-96	-0.0400655	-0.558128	-0.177303	0.151625	0.442366
-93.9	133.976	206.047	213.578	52.7431	13.8077	-165.04	254.674	280.32	589.408	599.231	533.764	569.302	201.844		-93.9	0.2194	0.67455	-0.00242	0.24917	0.29442	-0.46439	3.08151	0.08196	2.98155	1.53976	0.74632	0.60806	0.38769																-93.9	0.146745	0.339132	-0.0784135	-0.0596554	-0.536634
-91.8	133.238	205.823	213.287	52.7431	14.2304	-167.113	248.462	279.301	585.887	597.741	527	569.302	202.215		-91.8	-0.51639	0.4532	-0.29172	0.25948	0.72443	-2.52916	-3.14231	-0.93204	-0.52724	0.07633	-5.99891	0.62325	0.76766																-91.8	-0.589045	0.117782	-0.367713	-0.0493454	-0.106624
-89.7	133.607	206.271	213.967	52.7431	13.6668	-167.113	257.78	278.282	585.887	596.748	537.453	569.302	200.361		-89.7	-0.14498	0.90295	0.38977	0.2698	0.16813	-2.52054	6.16288	-1.94603	-0.51574	-0.8906	4.47406	0.63844	-1.07656																-89.7	-0.217635	0.567532	0.313777	-0.0390254	-0.662924
-87.6	133.976	204.257	213.384	52.6323	13.9486	-163.796	256.227	279.131	582.87	597.741	532.534	574.972	202.03		-87.6	0.22633	-1.1082	-0.19084	0.16932	0.45723	0.80548	4.59776	-1.09133	-3.52174	0.12827	-0.42637	6.32394	0.60091																-87.6	0.153675	-1.44362	-0.266833	-0.139505	-0.373824
-85.5	133.607	206.718	213.19	52.8539	14.5122	-166.284	253.121	279.811	588.402	599.231	532.534	572.704	202.03		-85.5	-0.14036	1.35505	-0.38314	0.40123	1.02813	-1.67389	1.47975	-0.40642	2.02176	1.64364	-0.4073	4.07103	0.61018																-85.5	-0.213015	1.01963	-0.459133	0.0924046	0.197076
-83.4	134.53	206.271	213.481	52.1891	14.794	-165.869	257.78	279.471	589.408	598.238	533.764	567.034	201.659		-83.4	0.78465	0.91001	-0.08995	-0.25325	1.31724	-1.25067	6.12623	-0.74092	3.03906	0.67671	0.84167	-1.58408	0.24875																-83.4	0.711995	0.574592	-0.165943	-0.562075	0.486186
-81.3	133.238	205.376	213.869	52.8539	14.5122	-162.137	255.45	280.15	584.378	598.238	535.609	569.302	202.586		-81.3	-0.50484	0.01746	0.30025	0.42187	1.04274	2.49005	3.78462	-0.05601	-1.97854	0.70268	2.70554	0.69921	1.18473																-81.3	-0.577495	-0.317958	0.224257	0.113045	0.211686
-79.2	134.161	206.047	213.481	53.0755	14.5122	-164.625	260.109	280.15	585.887	596.748	533.149	568.735	200.732		-79.2	0.42017	0.69101	-0.08616	0.65378	1.05004	0.01068	8.4311	-0.05071	-0.45824	-0.76075	0.26491	0.1474	-0.6595																-79.2	0.347515	0.355592	-0.162153	0.344955	0.218986
-77.1	133.792	206.942	213.481	52.7431	14.794	-163.796	250.792	280.66	586.893	595.259	535.609	571.57	201.474		-77.1	0.05338	1.58826	-0.08427	0.3317	1.33914	0.8486	-0.89841	0.4642	0.55907	-2.22418	2.74368	2.99769	0.09117																-77.1	-0.0192755	1.25284	-0.160263	0.0228746	0.508086
-75	132.5	205.376	213.578	52.5215	14.6531	-164.211	259.332	279.641	587.396	593.273	532.534	568.168	200.917		-75	-1.23611	0.02451	0.01463	0.12042	1.20554	0.44253	7.63018	-0.54979	1.07347	-4.18411	-0.31195	-0.38931	-0.45555																-75	-1.30877	-0.310908	-0.0613635	-0.188405	0.374486
-72.9	134.161	206.271	213.481	52.5215	14.794	-163.381	253.897	280.83	583.875	600.223	538.683	571.003	201.659		-72.9	0.4271	0.92177	-0.08048	0.13073	1.35375	1.28055	2.18286	0.64471	-2.43543	2.79236	5.85652	2.46108	0.29512																-72.9	0.354445	0.586352	-0.156473	-0.178095	0.522696
-70.8	133.423	205.823	213.772	52.4107	14.0895	-165.04	248.462	279.811	583.875	598.238	530.689	574.972	200.176		-70.8	-0.30879	0.47672	0.21261	0.03025	0.65655	-0.36953	-3.26445	-0.36928	-2.42393	0.83253	-2.11861	6.44547	-1.17841																-70.8	-0.381445	0.141302	0.136617	-0.278575	-0.174504
-68.7	133.053	205.6	213.287	52.6323	13.5259	-165.455	254.674	281.34	589.91	598.734	537.453	565.333	200.917		-68.7	-0.67558	0.25527	-0.27089	0.26217	0.10025	-0.7756	2.93493	1.16502	3.62247	1.3549	4.66476	-3.17884	-0.42773																-68.7	-0.748235	-0.0801476	-0.346883	-0.0466554	-0.730804
-66.6	133.423	206.495	213.675	52.6323	13.9486	-159.235	254.674	279.981	587.899	599.727	541.143	564.199	201.103		-66.6	-0.30417	1.15252	0.1193	0.27248	0.53025	5.45312	2.92272	-0.18877	1.62237	2.37377	8.37343	-4.29775	-0.23316																-66.6	-0.376825	0.817102	0.0433065	-0.0363454	-0.300804
-64.5	134.345	204.929	213.772	52.5215	12.8215	-166.284	257.78	279.301	588.402	598.238	530.689	571.57	201.659		-64.5	0.62084	-0.41113	0.2183	0.172	-0.58955	-1.58766	6.0163	-0.86307	2.13677	0.91044	-2.0614	3.08884	0.33221																-64.5	0.548185	-0.746548	0.142307	-0.136825	-1.4206
-62.4	132.684	204.929	213.869	52.5215	14.794	-165.04	255.45	279.471	587.899	598.238	528.844	567.034	201.474		-62.4	-1.03765	-0.40878	0.31729	0.18232	1.39026	-0.33503	3.67469	-0.68786	1.64538	0.93641	-3.88713	-1.43216	0.15609																-62.4	-1.11031	-0.744198	0.241297	-0.126505	0.559206
-60.3	133.976	204.481	213.772	52.9647	13.385	-162.137	258.556	280.32	581.361	597.741	535.609	567.601	202.03		-60.3	0.25636	-0.85392	0.22208	0.63583	-0.01144	2.57629	6.76827	0.16684	-4.88092	0.46588	2.89624	-0.84997	0.72146																-60.3	0.183705	-1.18934	0.146087	0.327005	-0.842494
-58.2	134.345	205.376	213.869	52.0782	14.6531	-164.211	253.897	280.15	586.893	599.727	533.149	573.838	202.215		-58.2	0.62777	0.04333	0.32108	-0.24035	1.26396	0.51152	2.09736	0.00235	0.66258	2.47765	0.45561	5.40262	0.91603																-58.2	0.555115	-0.292088	0.245087	-0.549175	0.432906
-56.1	134.345	205.6	213.675	53.0755	14.2304	-164.625	253.897	279.811	585.887	595.259	532.534	567.034	200.917		-56.1	0.63008	0.26938	0.12877	0.76726	0.84856	0.10554	2.08514	-0.33215	-0.33172	-1.96448	-0.14032	-1.38659	-0.37209																-56.1	0.557425	-0.0660376	0.0527765	0.458435	0.0175056
-54	133.792	204.929	213.384	53.2971	14.9349	-162.137	247.686	278.961	585.887	601.713	532.534	572.704	199.991		-54	0.07879	-0.39937	-0.16054	0.99918	1.56037	2.60216	-4.13857	-1.17634	-0.32022	4.51549	-0.12125	4.2989	-1.28962																-54	0.00613453	-0.734788	-0.236533	0.690355	0.729316
-51.9	133.792	205.376	213.093	52.7431	13.5259	-169.601	260.885	279.811	585.887	599.231	536.838	572.137	201.659		-51.9	0.0811	0.05038	-0.44994	0.4555	0.15867	-4.85331	9.04871	-0.32154	-0.30872	2.05916	4.20242	3.74709	0.38785																-51.9	0.00844453	-0.285038	-0.525933	0.146675	-0.672384
-49.8	133.976	206.047	213.19	52.8539	13.8077	-166.284	251.568	279.811	585.887	601.713	533.149	570.436	202.03		-49.8	0.26791	0.72394	-0.35095	0.57661	0.44777	-1.52729	-0.2808	-0.31623	-0.29721	4.56743	0.53189	2.06118	0.76783																-49.8	0.195255	0.388522	-0.426943	0.267785	-0.383284
-47.7	134.345	206.942	214.064	53.0755	14.0895	-167.943	253.897	281.34	586.39	600.72	533.764	565.9	200.732		-47.7	0.63932	1.62119	0.52464	0.80853	0.73687	-3.17737	2.03628	1.21807	0.21719	3.6005	1.16586	-2.45992	-0.5204																-47.7	0.566665	1.28577	0.448647	0.499705	-0.0941844
-45.6	133.607	205.376	214.064	52.8539	15.3576	-165.455	261.662	280.32	587.899	600.223	536.223	568.168	203.327		-45.6	-0.09647	0.05744	0.52654	0.59725	2.01227	-0.68074	9.78857	0.20398	1.73739	3.12997	3.64463	-0.17663	2.08377																-45.6	-0.169125	-0.277978	0.450547	0.288425	1.18122
-43.5	134.345	206.047	213.481	52.6323	13.9486	-161.308	255.45	279.131	584.881	603.202	534.379	571.003	201.659		-43.5	0.64394	0.73099	-0.05397	0.38596	0.61058	3.47468	3.56475	-0.97992	-1.26861	6.13474	1.8189	2.67376	0.42495																-43.5	0.571285	0.395572	-0.129963	0.0771346	-0.220474
-41.4	133.976	206.495	213.578	52.4107	14.9349	-166.699	254.674	280.15	582.367	603.202	533.149	567.601	200.917		-41.4	0.27715	1.18074	0.04493	0.17468	1.60418	-1.90749	2.77614	0.04479	-3.77161	6.16071	0.60817	-0.71325	-0.30718																-41.4	0.204495	0.845322	-0.0310635	-0.134145	0.773126
-39.3	134.161	206.047	213.772	52.6323	14.6531	-163.796	249.239	279.811	588.905	594.762	530.689	568.168	200.917		-39.3	0.46406	0.7357	0.24102	0.4066	1.32968	1.00383	-2.67118	-0.28971	2.77769	-2.25322	-1.83256	-0.13106	-0.29791																-39.3	0.391405	0.400282	0.165027	0.0977746	0.498626
-37.2	133.792	205.376	213.287	52.2999	14.2304	-164.211	255.45	281	585.887	598.238	534.994	567.034	201.103		-37.2	0.09727	0.06685	-0.24249	0.08451	0.91428	0.59775	3.52811	0.9048	-0.22821	1.24805	2.49111	-1.24987	-0.10333																-37.2	0.0246145	-0.268568	-0.318483	-0.224315	0.0832256
-35.1	132.869	206.271	213.578	52.4107	14.9349	-164.211	253.121	281.34	581.864	597.741	533.764	569.302	201.844		-35.1	-0.82312	0.9641	0.05061	0.20563	1.62608	0.60638	1.18659	1.2499	-4.24	0.77752	1.28028	1.03343	0.64734																-35.1	-0.895775	0.628682	-0.0253835	-0.103195	0.795026
-33	133.607	206.495	213.772	52.4107	14.6531	-165.04	250.015	279.981	587.396	596.748	538.683	566.467	201.474		-33	-0.08261	1.19015	0.2467	0.21595	1.35159	-0.2143	-1.93142	-0.10389	1.3035	-0.18941	6.21885	-1.78658	0.28591																-33	-0.155265	0.854732	0.170707	-0.0928754	0.520536
-30.9	133.976	204.257	213.578	51.9674	15.0758	-163.381	251.568	279.981	587.396	599.231	533.764	567.601	201.103		-30.9	0.2887	-1.0447	0.05439	-0.21704	1.78159	1.45302	-0.39073	-0.09858	1.315	2.31886	1.31842	-0.63729	-0.07551																-30.9	0.216045	-1.38012	-0.0216035	-0.525865	0.950536
-28.8	133.792	206.271	214.064	52.6323	14.6531	-167.943	252.344	278.621	586.893	597.245	532.534	569.869	202.956		-28.8	0.10651	0.97116	0.54169	0.45818	1.36619	-3.09975	0.37345	-1.45248	0.8236	0.35893	0.10759	1.646	1.78726																-28.8	0.0338545	0.635742	0.465697	0.149355	0.535136
-26.7	133.792	206.271	214.258	52.8539	14.2304	-165.04	253.897	280.49	586.39	597.245	527.614	568.735	202.4		-26.7	0.10882	0.97351	0.73778	0.6901	0.95079	-0.18843	1.91414	0.42163	0.3322	0.3849	-4.79284	0.52719	1.24053																-26.7	0.0361645	0.638092	0.661787	0.381275	0.119736
-24.6	134.345	205.823	213.772	52.4107	13.8077	-163.796	253.121	281.51	582.367	598.238	531.919	564.766	202.4		-24.6	0.66473	0.52846	0.25428	0.25721	0.5354	1.06419	1.12552	1.44633	-3.6796	1.40387	-0.46917	-3.42692	1.24981																-24.6	0.592075	0.193042	0.178287	-0.0516154	-0.295654
-22.5	133.792	205.152	213.578	52.4107	13.9486	-165.455	245.356	280.49	585.384	596.748	532.534	572.137	202.586		-22.5	0.11344	-0.14039	0.06197	0.26753	0.6836	-0.58588	-6.65119	0.43224	-0.6506	-0.05956	0.1648	3.95977	1.44438																-22.5	0.0407845	-0.475808	-0.0140235	-0.0412954	-0.147454
-20.4	133.607	205.376	213.675	52.0782	14.2304	-162.137	254.674	279.811	586.893	599.727	529.459	564.199	201.288		-20.4	-0.06875	0.08566	0.16096	-0.05465	0.9727	2.74014	2.65399	-0.24196	0.86961	2.94511	-2.89082	-3.96353	0.15625																-20.4	-0.141405	-0.249758	0.0849665	-0.363475	0.141646
-18.3	133.792	204.257	213.869	52.5215	14.6531	-163.796	252.344	279.981	588.402	593.273	528.229	570.436	201.103		-18.3	0.11806	-1.03058	0.35706	0.39896	1.4027	1.09007	0.31238	-0.06675	2.38981	-3.48292	-4.10155	2.28906	-0.01987																-18.3	0.0454045	-1.366	0.281067	0.0901346	0.571646
-16.2	133.607	205.6	213.772	52.7431	14.794	-160.479	250.015	280.32	585.384	600.72	534.994	570.436	201.844		-16.2	-0.06562	0.31407	0.26185	0.63088	1.5509	4.41609	-2.02914	0.27825	-0.61609	3.99005	2.68182	2.30425	0.7308																-16.2	-0.138275	-0.0213476	0.185857	0.322055	0.719846
-14.1	133.423	206.271	213.384	53.7403	14.2304	-167.113	259.332	279.981	587.899	600.72	539.298	571.57	202.215		-14.1	-0.25405	0.98762	-0.12456	1.6384	0.99461	-2.21009	7.27595	-0.05614	1.90991	4.01602	7.00539	3.45344	1.11077																-14.1	-0.326705	0.652202	-0.200553	1.32957	0.163556
-12	133.976	204.705	214.161	52.9647	13.8077	-165.455	252.344	281.849	590.413	593.769	533.764	568.735	200.917		-12	0.29572	-0.57603	0.65454	0.87311	0.57921	-0.54952	0.27573	1.81697	4.43591	-2.90851	1.4834	0.63353	-0.17735																-12	0.223065	-0.911448	0.578547	0.564285	-0.251844
-9.9	133.792	206.495	213.967	52.5215	14.3713	-165.869	250.015	279.471	585.384	598.734	531.304	569.302	200.361		-9.9	0.10739	1.21602	0.46367	0.44023	1.15011	-0.97039	-2.06578	-0.55841	-0.58159	2.08206	-0.97191	1.21572	-0.72418																-9.9	0.0347345	0.880602	0.387677	0.131405	0.319056
-7.8	134.53	205.823	214.064	53.1863	13.6668	-163.796	254.674	279.981	586.893	594.266	534.994	570.436	200.917		-7.8	0.84175	0.54727	0.5639	1.11535	0.45291	1.09684	2.5807	-0.04559	0.93861	-2.37386	2.72227	2.36502	-0.16547																-7.8	0.769095	0.211852	0.487907	0.806525	-0.378144
-5.7	133.976	207.166	214.161	52.7431	13.2441	-166.284	260.885	280.66	585.384	596.748	534.994	567.034	200.917		-5.7	0.28422	1.89193	0.66422	0.68246	0.03752	-1.39734	8.77999	0.63703	-0.55858	0.10727	2.72676	-1.02199	-0.16615																-5.7	0.211565	1.55651	0.588227	0.373635	-0.793534
-3.6	133.792	205.376	214.258	52.9647	14.9349	-163.796	250.015	279.471	585.887	596.252	536.838	565.333	200.547		-3.6	0.09589	0.10448	0.76455	0.90424	1.71838	1.08449	-2.10243	-0.54905	-0.04418	-0.39041	4.57604	-2.7079	-0.53752																-3.6	0.0232345	-0.230938	0.688557	0.595415	0.887326
-1.5	133.423	206.047	213.869	52.8539	14.0895	-165.455	256.227	280.49	585.384	600.72	533.764	568.168	201.474		-1.5	-0.27704	0.77803	0.37947	0.7897	0.85639	-0.58039	4.09696	0.47337	-0.53558	4.07662	1.50583	0.14239	0.38851																-1.5	-0.349695	0.442612	0.303477	0.480875	0.0253356
0.6	134.53	204.034	213.093	51.635	12.9624	-155.917	270.203	279.641	585.384	601.713	546.062	571.003	202.4		0.6	0.82643	-1.23312	-0.394	-0.43294	-0.2873	8.95094	18.0628	-0.37291	-0.52408	5.06834	13.809	2.99278	1.31463																0.6	0.753775	-1.56854	-0.469993	-0.741765	-1.11835
2.7	134.714	206.047	214.84	53.1863	13.9486	-155.917	263.991	282.869	589.408	604.692	538.068	577.241	204.068		2.7	1.0071	0.78227	1.35672	1.11462	0.6823	8.94476	11.8412	2.85811	3.51062	8.04597	5.8193	9.24537	2.98206																2.7	0.934445	0.446852	1.28073	0.805795	-0.148754
4.8	134.53	206.271	214.258	53.7403	14.3713	-151.356	267.097	281.51	592.928	604.195	541.758	574.972	204.068		4.8	0.81877	1.00522	0.77745	1.66488	1.08841	13.5	14.9369	1.50213	7.03519	7.54829	9.51339	6.98676	2.98138																4.8	0.746115	0.669802	0.701457	1.35605	0.257356
6.9	135.083	207.166	214.064	53.9619	15.7803	-150.112	268.65	281.51	589.91	610.649	535.609	580.076	204.439		6.9	1.36854	1.89937	0.58647	1.88274	2.48082	14.7378	16.4798	1.50525	4.02176	14.0011	3.36857	12.0996	3.35141																6.9	1.29588	1.56395	0.510477	1.57391	1.64977
9	135.083	207.389	215.131	54.0727	15.4985	-152.185	267.097	281.849	589.408	608.167	539.913	573.838	202.771		9	1.36471	2.12231	1.6576	1.9898	2.18243	12.6583	14.9169	1.84817	3.52292	11.5176	7.67756	5.87179	1.68263																9	1.29205	1.78689	1.58161	1.68097	1.35138
11.1	135.637	206.495	214.84	53.7403	14.6531	-153.429	261.662	282.189	593.431	604.195	544.218	582.344	202.956		11.1	1.91448	1.22666	1.36962	1.65366	1.32044	11.4082	9.47175	2.19099	7.55029	7.54477	11.9866	14.3868	1.86726																11.1	1.84182	0.891242	1.29363	1.34483	0.489386
13.2	135.083	206.495	214.743	53.9619	14.6531	-148.038	267.873	283.378	590.413	606.181	539.298	578.942	203.883		13.2	1.35705	1.22591	1.27575	1.87152	1.30385	16.7927	15.6732	3.38341	4.53686	9.52949	7.07163	10.9941	2.79329																13.2	1.28439	0.890492	1.19976	1.56269	0.472796
15.3	135.268	206.047	215.52	54.4051	15.6394	-150.941	266.32	280.49	589.408	603.202	540.528	580.643	204.624		15.3	1.53772	0.77776	2.05568	2.31098	2.27356	13.8838	14.1104	0.49833	3.53512	6.54952	8.30601	12.7047	3.53401																15.3	1.46506	0.442342	1.97969	2.00215	1.44251
17.4	134.53	205.823	214.84	54.2943	15.4985	-152.185	273.308	283.378	590.413	605.188	541.758	576.107	204.068		17.4	0.79578	0.55331	1.3793	2.19644	2.11607	12.6336	21.0884	3.38965	4.54499	8.53414	9.5403	8.17794	2.97734																17.4	0.723125	0.217892	1.30331	1.88761	1.28502
19.5	135.268	206.942	214.937	54.1835	15.3576	-150.941	274.861	282.359	589.408	603.202	544.218	579.509	204.439		19.5	1.53005	1.67115	1.47963	2.0819	1.95857	13.8715	22.6311	2.37337	3.54326	6.54717	12.0046	11.5897	3.34736																19.5	1.45739	1.33573	1.40364	1.77307	1.12752
21.6	134.161	205.823	214.549	53.9619	16.2029	-153.844	269.426	282.529	587.899	604.692	542.373	581.21	204.439		21.6	0.41902	0.5518	1.09445	1.85656	2.78728	10.9626	17.186	2.54639	2.03862	8.03539	10.1643	13.3003	3.34669																21.6	0.346365	0.216382	1.01846	1.54773	1.95623
23.7	134.161	205.823	214.743	53.6295	16.0621	-153.844	271.756	279.641	585.887	603.202	538.068	574.972	202.586		23.7	0.41519	0.55105	1.29188	1.52042	2.62989	10.9564	19.5054	-0.33859	0.03109	6.54482	5.86416	7.07238	1.49252																23.7	0.342535	0.215632	1.21589	1.21159	1.79884
25.8	134.714	206.942	214.549	52.9647	15.6394	-153.844	271.756	282.189	587.899	607.174	542.373	573.271	202.215		25.8	0.96496	1.6689	1.1009	0.85188	2.1906	10.9503	19.4953	2.21283	2.04676	10.5153	10.1732	5.38079	1.12114																25.8	0.892305	1.33348	1.02491	0.543055	1.35955
27.9	135.083	206.047	214.743	53.7403	14.5122	-150.526	274.861	282.359	582.367	603.202	540.528	577.241	203.512		27.9	1.33023	0.77324	1.29833	1.62374	1.04681	14.2615	22.591	2.38585	-3.48118	6.54247	8.33293	9.3596	2.41787																27.9	1.25757	0.437822	1.22234	1.31491	0.215756
30	134.899	205.6	214.646	54.2943	14.3713	-154.673	263.215	282.189	592.425	603.202	540.528	576.674	204.439		30	1.1418	0.32499	1.20445	2.174	0.88932	10.1085	10.9344	2.21907	6.58109	6.54129	8.33741	8.80201	3.34399																30	1.06914	-0.0104276	1.12846	1.86517	0.0582656
32.1	133.976	205.6	214.064	53.5187	15.6394	-155.088	262.438	281.34	588.402	600.223	531.304	576.107	203.142		32.1	0.21527	0.32424	0.62518	1.39466	2.14083	9.68772	10.1479	1.37279	2.56186	3.56131	-0.8822	8.24453	2.04592																32.1	0.142615	-0.0111776	0.549187	1.08583	1.30978
34.2	134.899	205.6	214.452	53.8511	14.794	-155.917	261.662	281.17	584.881	602.209	539.298	578.375	204.068		34.2	1.13414	0.32349	1.0168	1.72332	1.27883	8.85215	9.36144	1.20601	-0.95447	5.54604	7.11648	10.5221	2.97194																34.2	1.06148	-0.0119276	0.940807	1.41449	0.447776
36.3	133.976	206.718	214.84	53.7403	15.3576	-154.673	264.768	281.17	584.378	606.181	538.683	574.405	204.81		36.3	0.20761	1.44133	1.40833	1.60878	1.82584	10.09	12.4572	1.20913	-1.45331	9.51656	6.50607	6.56245	3.71267																36.3	0.134955	1.10591	1.33234	1.29995	0.994786
38.4	134.161	206.047	214.161	53.9619	14.9349	-155.088	270.203	280.66	587.396	603.202	533.149	574.972	202.4		38.4	0.38838	0.76948	0.73196	1.82664	1.38655	9.6692	17.8823	0.70255	1.56826	6.53659	0.97616	7.13896	1.3025																38.4	0.315725	0.434062	0.655967	1.51781	0.555496
40.5	133.976	206.718	214.549	53.5187	14.5122	-156.332	265.544	282.359	590.916	601.713	539.913	576.674	202.4		40.5	0.19994	1.43983	1.12348	1.3797	0.94726	8.41893	13.2135	2.40457	5.09263	5.04601	7.74484	8.84958	1.30182																40.5	0.127285	1.10441	1.04749	1.07087	0.116206
42.6	134.53	206.271	213.967	53.9619	15.0758	-156.747	269.426	280.66	584.881	603.202	541.758	570.436	203.698		42.6	0.74981	0.99168	0.54431	1.81916	1.49427	7.99815	17.0857	0.70879	-0.93821	6.53424	9.59413	2.62179	2.59855																42.6	0.677155	0.656262	0.468317	1.51033	0.663216
44.7	133.053	206.047	213.967	53.5187	14.6531	-157.576	260.885	279.981	587.396	604.195	541.758	571.57	203.142		44.7	-0.73042	0.76722	0.54753	1.37222	1.05498	7.16258	8.5348	0.03241	1.58046	7.52596	9.59861	3.7653	2.04187																44.7	-0.803075	0.431802	0.471537	1.06339	0.223926
46.8	135.083	205.6	214.258	53.1863	15.3576	-157.991	267.097	281.17	586.893	605.684	545.448	576.107	204.254		46.8	1.29575	0.31897	0.84196	1.03608	1.74289	6.7417	14.7364	1.22473	1.08163	9.01419	13.2928	8.31111	3.1532																46.8	1.22309	-0.0164476	0.765967	0.727255	0.911836
48.9	133.792	206.495	214.355	53.1863	14.9349	-155.503	267.097	282.359	585.887	602.209	536.223	580.643	203.142		48.9	0.000121512	1.21312	0.94228	1.03234	1.3036	9.22363	14.7263	2.41705	0.07989	5.53781	4.07318	12.8569	2.04053																48.9	-0.072534	0.877702	0.866287	0.723515	0.472546
51	133.976	205.152	213.967	53.8511	16.0621	-156.747	264.768	279.981	582.367	602.706	541.758	579.509	203.327		51	0.18079	-0.12993	0.55721	1.6934	2.4142	7.97345	12.387	0.04177	-3.43644	6.03304	9.61207	11.7323	2.22515																51	0.108135	-0.465348	0.481217	1.38457	1.58315
53.1	134.714	205.823	214.549	52.9647	15.4985	-152.6	264.768	281.51	590.413	604.195	539.298	573.271	204.068		53.1	0.91516	0.54051	1.14283	0.80326	1.83401	12.114	12.377	1.57389	4.61413	7.52126	7.15686	5.50445	2.96588																53.1	0.842505	0.205092	1.06684	0.494435	1.00296
55.2	134.53	205.6	213.481	52.9647	14.6531	-154.259	265.544	281.51	590.916	600.223	541.143	576.107	204.068		55.2	0.72683	0.31596	0.07826	0.79952	0.97202	10.4491	13.1434	1.57701	5.1211	3.54839	9.00614	8.34916	2.9652																55.2	0.654175	-0.0194576	0.00226653	0.490695	0.140966
57.3	133.423	205.823	214.161	54.1835	14.9349	-153.429	264.768	281.34	585.384	604.692	534.379	571.57	204.254		57.3	-0.3843	0.53901	0.76099	2.01458	1.23723	11.2723	12.3569	1.41023	-0.40674	8.01541	2.24633	3.82238	3.14983																57.3	-0.456955	0.203592	0.684997	1.70575	0.406176
59.4	134.53	205.152	214.064	53.8511	16.7665	-157.991	271.756	278.961	591.419	603.202	542.373	573.838	203.698		59.4	0.71917	-0.13294	0.66711	1.67844	3.05224	6.70466	19.3349	-0.96515	5.63213	6.52484	10.245	6.10009	2.59315																59.4	0.646515	-0.468358	0.591117	1.36961	2.22119
61.5	135.083	205.376	213.869	53.4079	15.2167	-155.503	267.873	282.019	593.431	599.727	538.068	572.704	202.956		61.5	1.26894	0.09001	0.47624	1.2315	1.48585	9.18658	15.4426	2.09607	7.6479	3.04836	5.9449	4.9755	1.85108																61.5	1.19628	-0.245408	0.400247	0.922675	0.654796
63.6	133.423	205.823	214.064	53.8511	15.3576	-153.429	272.532	282.529	586.39	602.706	539.913	574.972	204.439		63.6	-0.39579	0.53675	0.67356	1.67096	1.61016	11.2538	20.0912	2.60879	0.61126	6.02599	7.79418	7.25312	3.33321																63.6	-0.468445	0.201332	0.597567	1.36213	0.779106
65.7	133.607	206.271	214.161	53.6295	14.794	-153.844	266.32	280.66	589.408	603.202	544.218	576.107	203.883		65.7	-0.21503	0.9834	0.77389	1.44562	1.02996	10.8329	13.8697	0.74311	3.63273	6.52131	12.1033	8.39673	2.77643																65.7	-0.287685	0.647982	0.697897	1.13679	0.198906
67.8	134.345	205.376	214.84	53.7403	15.2167	-155.917	273.308	281.849	584.378	604.692	543.603	573.838	204.068		67.8	0.51924	0.08775	1.45671	1.55268	1.43607	8.75336	20.8477	1.93553	-1.3923	8.00954	11.4929	6.13814	2.96116																67.8	0.446585	-0.247668	1.38072	1.24385	0.605016
69.9	133.792	205.376	214.549	52.9647	15.0758	-153.429	263.215	280.49	590.413	603.202	535.609	578.375	203.327		69.9	-0.03819	0.087	1.16864	0.77335	1.27858	11.2353	10.7439	0.57945	4.64666	6.51896	3.50314	10.6838	2.21908																69.9	-0.110845	-0.248418	1.09265	0.464525	0.447526
72	134.161	206.047	214.258	53.6295	15.3576	-154.673	272.532	281.34	586.893	601.713	534.379	577.241	203.512		72	0.32708	0.75744	0.88066	1.43441	1.54379	9.98501	20.0511	1.43207	1.13043	5.02839	2.27773	9.55937	2.40371																72	0.254425	0.422022	0.804667	1.12558	0.712736
74.1	133.976	205.152	214.452	53.4079	14.9349	-155.503	261.662	280.49	589.91	605.188	545.448	574.405	202.4		74.1	0.13865	-0.13821	1.07809	1.20907	1.1045	9.14954	9.1709	0.58569	4.1519	8.50241	13.3511	6.73368	1.29104																74.1	0.0659945	-0.473628	1.0021	0.900245	0.273446
76.2	134.899	206.718	214.064	53.2971	15.2167	-156.332	269.426	281	585.384	606.677	539.298	579.509	201.474		76.2	1.05752	1.42704	0.69291	1.09453	1.36971	8.31396	16.9253	1.09851	-0.37014	9.99064	7.2062	11.8465	0.36356																76.2	0.984865	1.09162	0.616917	0.785705	0.538656
78.3	134.714	206.271	214.064	53.6295	15.3576	-156.332	271.756	280.83	585.887	604.195	538.683	578.375	202.586		78.3	0.86919	0.97889	0.69614	1.42319	1.49402	8.30779	19.2447	0.93173	0.13683	7.50716	6.59578	10.7219	1.47499																78.3	0.796535	0.643472	0.620147	1.11436	0.662966
80.4	134.161	205.823	214.161	53.6295	15.6394	-154.259	260.109	282.189	584.378	604.195	541.758	575.54	203.142		80.4	0.31176	0.53073	0.79647	1.41945	1.75923	10.375	7.58792	2.29395	-1.3679	7.50599	9.67487	7.89632	2.03041																80.4	0.239105	0.195312	0.720477	1.11062	0.928176
82.5	134.714	206.271	214.258	53.7403	15.6394	-159.235	269.426	282.019	586.893	602.209	542.373	578.942	202.956		82.5	0.86153	0.97738	0.89679	1.52651	1.74263	5.39274	16.8952	2.12727	1.15077	5.51901	10.2943	11.308	1.84434																82.5	0.788875	0.641962	0.820797	1.21768	0.911576
84.6	134.53	205.823	213.869	53.7403	14.794	-155.917	271.756	280.32	588.905	602.706	540.528	577.808	204.254		84.6	0.6732	0.52923	0.51172	1.52277	0.88064	8.70397	19.2146	0.43139	3.16643	6.01424	8.45404	10.1834	3.14107																84.6	0.600545	0.193812	0.435727	1.21394	0.0495856
86.7	134.53	205.823	214.84	53.9619	15.6394	-152.185	270.979	281.34	589.91	606.181	539.913	572.137	202.956		86.7	0.66937	0.52848	1.48574	1.74063	1.70945	12.4299	18.428	1.45391	4.1763	9.48836	7.84352	4.52265	1.84299																86.7	0.596715	0.193062	1.40975	1.4318	0.878396
88.8	134.53	206.271	213.967	52.8539	16.2029	-150.112	264.768	281.849	586.893	605.188	538.683	572.704	202.771		88.8	0.66554	0.97512	0.61527	0.62889	2.25636	14.497	12.2065	1.96674	1.16297	8.49418	6.61821	5.09917	1.65702																88.8	0.592885	0.639702	0.539277	0.320065	1.42531
90.9	133.607	206.271	214.161	53.4079	15.2167	-155.088	264.768	282.529	588.402	604.692	538.683	578.375	203.327		90.9	-0.261	0.97437	0.81259	1.17915	1.25357	9.51484	12.1965	2.64936	2.67573	7.99661	6.6227	10.779	2.21234																90.9	-0.333655	0.638952	0.736597	0.870325	0.422516
93	134.345	206.495	214.452	53.9619	15.7803	-151.356	264.768	280.83	588.402	601.713	534.994	573.838	204.439		93	0.47327	1.19732	1.10712	1.72941	1.80058	13.2407	12.1865	0.95358	2.6798	5.01663	2.93758	6.25229	3.32377																93	0.400615	0.861902	1.03113	1.42058	0.969526
95.1	134.161	204.705	214.355	53.4079	15.4985	-153.429	260.885	281	586.39	605.188	538.068	573.838	203.142		95.1	0.28494	-0.59313	1.01324	1.17167	1.50219	11.1612	8.29412	1.1266	0.67227	8.49066	6.01667	6.2618	2.02569																95.1	0.212285	-0.928548	0.937247	0.862845	0.671136
97.2	134.714	206.942	214.355	53.8511	13.9486	-154.259	265.544	281.34	587.899	603.699	541.758	571.003	204.068		97.2	0.83471	1.64332	1.01647	1.61113	-0.06431	10.3256	12.9428	1.46952	2.18503	7.00008	9.71075	3.43612	2.95172																97.2	0.762055	1.3079	0.940477	1.3023	-0.895364
99.3	133.976	206.718	214.743	53.6295	15.4985	-152.6	268.65	281.34	585.384	604.692	539.298	576.674	205.18		99.3	0.09268	1.41876	1.40799	1.38579	1.469	11.9781	16.0386	1.47264	-0.3254	7.99191	7.25554	9.11593	4.06315																99.3	0.0200245	1.08334	1.332	1.07696	0.637946
101.4	134.53	205.376	214.646	53.1863	15.9212	-151.356	267.097	279.641	587.899	606.677	542.373	571.003	203.883		101.4	0.64255	0.07571	1.31412	0.93885	1.87511	13.216	14.4756	-0.22314	2.19317	9.97653	10.3347	3.45514	2.76497																101.4	0.569895	-0.259708	1.23813	0.630025	1.04406
103.5	135.821	205.823	214.937	53.5187	15.6394	-152.6	266.32	280.66	591.419	600.72	539.913	575.54	203.142		103.5	1.93042	0.52246	1.60865	1.26751	1.57672	11.9658	13.6892	0.79928	5.71753	4.01786	7.87941	8.00095	2.023																103.5	1.85776	0.187042	1.53266	0.958685	0.745666
105.6	134.53	206.718	213.869	53.9619	16.4847	-158.405	269.426	281.17	588.905	603.202	547.292	573.271	201.659		105.6	0.63489	1.41651	0.54397	1.70697	2.40543	6.15422	16.7849	1.3121	3.2071	6.49898	15.2632	5.74227	0.53952																105.6	0.562235	1.08109	0.467977	1.39814	1.57438
107.7	134.714	207.389	214.064	53.8511	15.6394	-153.844	270.203	279.641	588.402	605.684	538.683	578.942	205.366		107.7	0.81556	2.08695	0.7413	1.59243	1.54354	10.7095	17.5513	-0.21378	2.70827	8.98011	6.65858	11.4222	4.24575																107.7	0.742905	1.75153	0.665307	1.2836	0.712486
109.8	135.268	206.271	214.258	53.5187	16.2029	-153.429	268.65	279.981	589.408	600.223	538.683	574.972	203.512		109.8	1.36533	0.9676	0.93872	1.25629	2.09045	11.118	15.9884	0.12914	3.71814	3.51783	6.66307	7.46239	2.39158																109.8	1.29267	0.632182	0.862727	0.947465	1.2594
111.9	134.899	205.376	213.869	52.8539	15.6394	-152.185	261.662	281	589.91	606.181	542.373	570.436	202.215		111.9	0.9924	0.07195	0.55365	0.58775	1.51036	12.3558	8.9904	1.15156	4.2251	9.47426	10.3572	2.93571	1.0935																111.9	0.919745	-0.263468	0.477657	0.278925	0.679306
114	135.083	205.823	214.743	54.6268	15.0758	-155.917	270.979	281.51	586.39	605.188	539.913	572.704	204.995		114	1.17317	0.5187	1.43057	2.35691	0.93016	8.61752	18.2977	1.66438	0.70887	8.48008	7.90184	5.21332	3.87303																114	1.10051	0.183282	1.35458	2.04808	0.0991056
116.1	135.821	205.823	214.452	53.4079	15.3576	-151.771	273.308	281.679	586.39	604.195	541.758	573.271	205.366		116.1	1.90743	0.51794	1.1426	1.13427	1.19537	12.7581	20.617	1.8374	0.71294	7.48601	9.75112	5.78983	4.24305																116.1	1.83477	0.182522	1.06661	0.825445	0.364316
118.2	134.714	206.271	214.452	53.2971	15.7803	-153.015	264.768	281.51	587.899	606.677	544.218	572.704	204.624		118.2	0.7964	0.96459	1.14582	1.01973	1.60148	11.5079	12.0661	1.67062	2.2257	9.96713	12.2154	5.23234	3.50098																118.2	0.723745	0.629172	1.06983	0.710905	0.770426
120.3	134.161	207.389	214.646	53.7403	15.7803	-157.161	267.097	281.17	585.384	602.706	537.453	577.808	203.698		120.3	0.23897	2.08244	1.34315	1.45919	1.58489	7.355	14.3854	1.33394	-0.28473	5.99426	5.45559	10.3452	2.5736																120.3	0.166315	1.74702	1.26716	1.15036	0.753836
122.4	134.899	205.823	214.84	53.6295	17.3301	-157.576	270.203	281.849	589.91	608.663	537.453	577.241	205.737		122.4	0.97324	0.51569	1.54057	1.34465	3.1181	6.93413	17.4812	2.01666	4.24544	11.9507	5.46008	9.78767	4.61173																122.4	0.900585	0.180272	1.46458	1.03582	2.28705
124.5	135.268	205.6	214.937	53.8511	15.3576	-154.673	273.308	281.849	587.396	607.67	541.758	572.137	204.995		124.5	1.33851	0.29113	1.6409	1.56251	1.12901	9.83065	20.5769	2.01978	1.735	10.9565	9.76907	4.69388	3.86966																124.5	1.26585	-0.0442876	1.56491	1.25368	0.297956
126.6	134.53	206.495	214.743	53.4079	15.7803	-152.6	265.544	281.51	587.899	605.188	542.988	577.241	204.068		126.6	0.59658	1.18528	1.44993	1.11557	1.53512	11.8979	12.8024	1.6831	2.24197	8.47303	11.0035	9.80669	2.94228																126.6	0.523925	0.849862	1.37394	0.806745	0.704066
128.7	134.53	206.271	214.743	54.1835	16.6256	-153.015	270.979	283.038	589.91	604.195	540.528	577.808	202.03		128.7	0.59275	0.96083	1.45315	1.88743	2.36382	11.477	18.2275	3.21522	4.25764	7.47896	8.54824	10.3832	0.90281																128.7	0.520095	0.625412	1.37716	1.5786	1.53277
130.8	134.714	206.047	214.646	53.9619	15.7803	-157.161	271.756	281	585.384	600.72	539.298	578.942	204.439		130.8	0.77342	0.73638	1.35928	1.66209	1.50193	7.32413	18.9939	1.17964	-0.26439	4.00258	7.32282	11.5268	3.31163																130.8	0.700765	0.400962	1.28329	1.35326	0.670876
132.9	135.083	207.613	214.646	54.516	15.6394	-157.991	267.097	280.66	587.396	602.706	542.373	572.137	203.512		132.9	1.13869	2.30163	1.3625	2.21245	1.34444	6.48856	14.3252	0.84296	1.75127	5.98721	10.402	4.73193	2.38416																132.9	1.06603	1.96621	1.28651	1.90362	0.513386
135	135.083	206.495	214.937	54.516	16.2029	-156.747	275.638	281.17	592.425	602.209	544.218	577.241	201.844		135	1.13486	1.18227	1.65703	2.20871	1.89135	7.72648	22.8561	1.35578	6.78444	5.48963	12.2513	9.84474	0.71539																135	1.0622	0.846852	1.58104	1.89988	1.0603
137.1	135.452	206.942	214.549	53.6295	15.9212	-153.429	264.768	280.49	585.384	603.202	541.758	573.838	205.737		137.1	1.50013	1.62902	1.27185	1.31847	1.59306	11.0377	11.9759	0.6793	-0.25219	6.48136	9.79598	6.45206	4.60701																137.1	1.42747	1.2936	1.19586	1.00964	0.762006
139.2	134.899	206.271	214.549	53.8511	16.4847	-153.429	262.438	281.17	589.408	603.202	542.988	567.034	203.698		139.2	0.94259	0.95707	1.27508	1.53633	2.13997	11.0315	9.63643	1.36202	3.77507	6.48018	11.0304	-0.34283	2.56754																139.2	0.869935	0.621652	1.19909	1.2275	1.30892
141.3	134.714	206.495	214.84	53.8511	18.3164	-154.259	270.979	281	585.384	604.195	536.838	576.107	202.771		141.3	0.75426	1.18002	1.5696	1.53259	3.95508	10.196	18.1673	1.19524	-0.24406	7.4719	4.88555	8.73918	1.64016																141.3	0.681605	0.844602	1.49361	1.22376	3.12403
143.4	135.083	206.047	215.229	53.5187	16.6256	-152.6	261.662	281.51	587.396	603.699	543.603	574.972	204.995		143.4	1.11953	0.73186	1.96113	1.19645	2.24769	11.8485	8.83998	1.70806	1.77161	6.97423	11.6543	7.61459	3.86359																143.4	1.04687	0.396442	1.88514	0.887625	1.41664
145.5	135.452	206.942	215.035	53.8511	16.4847	-153.429	267.097	281.34	590.916	609.16	535.609	572.137	205.366		145.5	1.4848	1.62601	1.77025	1.52511	2.09019	11.013	14.2651	1.54128	5.29597	12.4342	3.66462	4.78901	4.23361																145.5	1.41214	1.29059	1.69426	1.21628	1.25914
147.6	135.452	206.047	214.549	54.0727	15.9212	-155.088	264.768	282.869	587.396	604.195	540.528	573.271	204.995		147.6	1.48097	0.73036	1.28798	1.74297	1.5101	9.34814	11.9257	3.0734	1.77974	7.46838	8.58861	5.93252	3.86224																147.6	1.40831	0.394942	1.21199	1.43414	0.679046
149.7	134.714	207.166	214.549	53.9619	15.9212	-154.673	267.873	280.66	592.425	603.202	544.218	574.405	202.771		149.7	0.73894	1.84821	1.29121	1.62843	1.49351	9.75656	15.0214	0.86792	6.81291	6.4743	12.2827	7.07613	1.63747																149.7	0.666285	1.51279	1.21522	1.3196	0.662456
151.8	134.899	206.718	214.161	54.2943	17.0483	-153.844	270.203	281.51	584.881	604.692	540.528	574.405	203.698		151.8	0.91961	1.39995	0.90613	1.95709	2.60402	10.5798	17.3408	1.72054	-0.72673	7.96253	8.59758	7.08565	2.56349																151.8	0.846955	1.06453	0.830137	1.64826	1.77297
153.9	135.268	206.271	214.064	53.9619	16.0621	-159.235	270.979	281.51	584.881	601.713	539.298	575.54	203.142		153.9	1.28488	0.9518	0.81226	1.62095	1.60123	5.18281	18.1071	1.72366	-0.72266	4.98255	7.37216	8.22926	2.00682																153.9	1.21222	0.616382	0.736267	1.31212	0.770176
156	134.53	207.166	214.064	53.8511	17.0483	-153.844	267.097	281.34	588.905	604.195	541.143	575.54	203.883		156	0.54295	1.84595	0.81548	1.50641	2.57084	10.5674	14.2149	1.55688	3.30471	7.46368	9.22145	8.23877	2.74744																156	0.470295	1.51053	0.739487	1.19758	1.73979
158.1	134.714	206.718	215.52	54.1835	16.2029	-154.259	263.991	280.66	585.887	606.677	544.833	576.674	204.995		158.1	0.72362	1.3977	2.27501	1.83507	1.70885	10.1466	11.0991	0.8804	0.29138	9.9448	12.9155	9.38228	3.85887																158.1	0.650965	1.06228	2.19902	1.52624	0.877796
160.2	135.268	206.271	215.229	53.8511	16.6256	-154.259	268.65	282.529	587.396	600.72	541.758	569.302	204.254		160.2	1.27339	0.94954	1.98693	1.49893	2.11495	10.1404	15.7477	2.75232	1.80414	3.98613	9.84532	2.0204	3.1168																160.2	1.20073	0.614122	1.91094	1.1901	1.2839
162.3	134.899	207.389	215.131	54.516	16.7665	-154.673	267.873	283.038	592.425	603.699	538.683	573.838	204.624		162.3	0.90046	2.06739	1.89306	2.16009	2.23926	9.71951	14.9612	3.26514	6.83731	6.96365	6.77521	6.56621	3.48682																162.3	0.827805	1.73197	1.81707	1.85126	1.40821
164.4	135.452	206.047	214.646	54.2943	16.7665	-150.112	267.097	281.51	587.899	604.692	541.143	579.509	204.439		164.4	1.45032	0.72434	1.41088	1.93466	2.22267	14.2747	14.1748	1.73926	2.31518	7.95548	9.23939	12.246	3.30085																164.4	1.37766	0.388922	1.33489	1.62583	1.39162
166.5	135.821	205.376	215.229	53.6295	16.2029	-155.917	275.638	281.17	588.905	608.167	544.218	578.375	205.551		166.5	1.81549	0.05239	1.99661	1.26612	1.64248	8.46317	22.7057	1.40258	3.32504	11.4295	12.3186	11.1214	4.41227																166.5	1.74283	-0.283028	1.92062	0.957295	0.811426
168.6	135.268	207.166	214.549	54.6268	16.4847	-153.429	263.991	282.869	586.893	607.174	538.683	573.838	202.771		168.6	1.25806	1.84144	1.32023	2.25968	1.90769	10.9451	11.0489	3.1046	1.31751	10.4354	6.78866	6.59475	1.6314																168.6	1.1854	1.50602	1.24424	1.95085	1.07664
170.7	134.714	208.061	214.84	54.516	16.7665	-155.917	261.662	282.869	589.91	605.684	542.988	577.241	203.327		170.7	0.70063	2.73558	1.61476	2.14514	2.1729	8.45082	8.70961	3.10772	4.33898	8.94485	11.0976	10.0065	2.18673																170.7	0.627975	2.40016	1.53877	1.83631	1.34185
172.8	135.083	206.495	214.549	54.4051	16.4847	-153.844	270.203	282.189	585.887	611.642	542.373	575.54	201.474		172.8	1.0659	1.16873	1.32669	2.0305	1.87451	10.518	17.2405	2.43124	0.31984	14.9013	10.4872	8.31487	0.33255																172.8	0.993245	0.833312	1.2507	1.72167	1.04346
174.9	134.899	205.6	214.646	54.0727	16.9074	-155.503	261.662	281	587.396	608.167	541.758	569.869	204.439		174.9	0.87747	0.27308	1.42701	1.69436	2.28062	8.85317	8.68955	1.24516	1.83261	11.4248	9.87672	2.65398	3.29748																174.9	0.804815	-0.0623376	1.35102	1.38553	1.44957
177	135.452	206.942	214.549	54.0727	16.3438	-156.332	265.544	282.019	590.916	603.699	538.068	572.137	203.883		177	1.42734	1.61473	1.33314	1.69062	1.70042	8.01759	12.5617	2.26768	5.35698	6.95543	6.19161	4.9317	2.7407																177	1.35468	1.27931	1.25715	1.38179	0.869366
179.1	135.268	206.271	214.452	53.9619	17.0483	-157.161	270.979	280.66	584.378	603.202	540.528	575.54	202.956		179.1	1.23891	0.94277	1.23936	1.57608	2.38833	7.18212	17.9868	0.9116	-1.17676	6.45785	8.65589	8.34341	1.81333																179.1	1.16625	0.607352	1.16337	1.26725	1.55728
181.2	135.637	205.376	215.035	53.9619	16.6256	-152.6	263.215	281	587.396	602.706	542.373	576.674	205.18		181.2	1.60418	0.04712	1.82509	1.57234	1.94904	11.7373	10.2124	1.25452	1.84481	5.96018	10.5052	9.48692	4.03685																181.2	1.53152	-0.288298	1.7491	1.26351	1.11799
183.3	134.899	206.718	215.131	54.1835	17.0483	-156.332	269.426	283.038	592.425	599.231	540.528	574.405	203.883		183.3	0.86215	1.38867	1.92531	1.7902	2.35515	7.99907	16.4138	3.29634	6.87798	2.4838	8.66486	7.22833	2.73868																183.3	0.789495	1.05325	1.84932	1.48137	1.5241
185.4	134.714	206.718	214.743	54.516	17.6119	-152.6	263.991	281.51	587.396	606.677	540.528	574.405	203.698		185.4	0.67382	1.38792	1.54024	2.11896	2.90216	11.725	10.9687	1.77046	1.85295	9.92953	8.66935	7.23785	2.55271																185.4	0.601165	1.0525	1.46425	1.81013	2.07111
187.5	135.083	206.047	214.646	54.4051	17.0483	-153.015	266.32	279.471	584.881	600.223	537.453	574.405	204.068		187.5	1.03909	0.71606	1.44636	2.00432	2.32197	11.3041	13.2881	-0.26512	-0.65759	3.47435	5.59913	7.24736	2.92273																187.5	0.966435	0.380642	1.37037	1.69549	1.49092
189.6	135.268	206.718	214.161	54.516	16.4847	-157.161	260.885	281.17	589.408	604.195	542.988	569.302	205.366		189.6	1.21975	1.38641	0.96419	2.11148	1.74178	7.15125	7.84286	1.4369	3.87268	7.44488	11.138	2.15357	4.21946																189.6	1.14709	1.05099	0.888197	1.80265	0.910726
191.7	136.006	206.495	214.937	54.4051	17.3301	-157.161	261.662	281.679	589.91	600.223	544.218	576.107	202.771		191.7	1.95412	1.16196	1.74411	1.99684	2.57058	7.14507	8.60933	1.94972	4.37965	3.472	12.3724	8.96748	1.62398																191.7	1.88146	0.826542	1.66812	1.68801	1.73953
193.8	135.452	206.495	214.84	53.8511	16.6256	-150.112	270.979	283.038	587.396	607.67	546.677	576.107	203.142		193.8	1.39669	1.16121	1.65024	1.4391	1.84949	14.1883	17.9166	3.31195	1.86921	10.9177	14.8366	8.977	1.99401																193.8	1.32403	0.825792	1.57425	1.13027	1.01844
195.9	135.268	206.271	214.84	54.2943	16.6256	-155.088	273.308	282.359	592.425	601.216	538.068	581.21	206.107		195.9	1.20826	0.93675	1.65347	1.87856	1.8329	9.20613	20.236	2.63547	6.90238	4.46255	6.23198	14.0898	4.95884																195.9	1.1356	0.601332	1.57748	1.56973	1.00185
198	135.083	206.942	213.967	55.07	17.8937	-157.576	263.215	282.699	587.899	603.699	539.298	577.808	204.068		198	1.01993	1.6072	0.78299	2.65052	3.08441	6.71185	10.1321	2.97839	2.38025	6.94367	7.46636	10.6971	2.91936																198	0.947275	1.27178	0.706997	2.34169	2.25336
200.1	135.637	207.389	215.229	54.7376	17.471	-154.259	263.991	283.038	586.893	603.202	542.988	579.509	204.068		200.1	1.5697	2.05385	2.04822	2.31438	2.64512	10.0231	10.8985	3.32131	1.37851	6.4461	11.1605	12.4077	2.91869																200.1	1.49704	1.71843	1.97223	2.00555	1.81407
202.2	135.083	207.166	215.131	54.8484	17.0483	-155.088	265.544	282.699	584.378	604.692	536.838	579.509	205.737		202.2	1.01227	1.8294	1.95434	2.42144	2.20583	9.1876	12.4414	2.98463	-1.13202	7.93432	5.01563	12.4172	4.58611																202.2	0.939615	1.49398	1.87835	2.11261	1.37478
204.3	134.53	207.389	214.161	54.2943	17.3301	-154.673	267.873	280.83	587.396	606.181	539.298	577.808	204.068		204.3	0.45484	2.05234	0.98677	1.8636	2.47104	9.59603	14.7607	1.11895	1.88955	9.42255	7.47982	10.7257	2.91734																204.3	0.382185	1.71692	0.910777	1.55477	1.63999
206.4	134.899	206.942	214.549	54.516	17.471	-155.503	260.885	281.17	587.396	604.692	542.373	579.509	203.883		206.4	0.82001	1.60419	1.37829	2.08156	2.59535	8.76055	7.76263	1.46187	1.89362	7.93197	10.559	12.4363	2.73126																206.4	0.747355	1.26877	1.3023	1.77273	1.7643
208.5	134.714	206.271	215.131	54.8484	16.7665	-152.6	270.203	281.34	588.402	601.713	538.683	575.54	203.327		208.5	0.63168	0.93224	1.96402	2.41022	1.87425	11.6571	17.07	1.63489	2.90348	4.952	6.87389	8.47659	2.17459																208.5	0.559025	0.596822	1.88803	2.10139	1.0432
210.6	135.083	206.718	214.84	54.516	16.7665	-148.868	270.979	281	590.413	604.692	542.373	572.704	203.327		210.6	0.99695	1.37889	1.67604	2.07408	1.85766	15.383	17.8364	1.29821	4.91915	7.92962	10.568	5.6509	2.17392																210.6	0.924295	1.04347	1.60005	1.76525	1.02661
212.7	135.083	207.166	214.937	54.6268	17.471	-154.673	263.215	281.849	588.402	603.699	542.373	574.972	203.327		212.7	0.99311	1.82564	1.77637	2.18114	2.54557	9.57133	10.0619	2.15083	2.91162	6.93545	10.5725	7.92851	2.17324																212.7	0.920455	1.49022	1.70038	1.87231	1.71452
214.8	135.452	207.166	214.258	54.4051	18.0346	-156.332	267.873	280.83	585.887	602.209	548.522	574.405	204.254		214.8	1.35838	1.82488	1.09999	1.9557	3.09258	7.90646	14.7105	1.13455	0.40118	5.44497	16.7263	7.37102	3.09927																214.8	1.28572	1.48946	1.024	1.64687	2.26153
216.9	135.452	206.718	214.452	54.2943	17.3301	-152.6	267.873	281.34	587.396	603.202	539.913	576.107	205.18		216.9	1.35455	1.37663	1.29742	1.84116	2.37149	11.6324	14.7005	1.64737	1.91395	6.4367	8.12163	9.08164	4.02539																216.9	1.28189	1.04121	1.22143	1.53233	1.54044
219	135.268	207.166	214.743	54.7376	17.8937	-153.015	266.32	281.34	589.91	602.706	539.298	574.405	204.81		219	1.16612	1.82338	1.59185	2.28072	2.9185	11.2115	13.1377	1.65049	4.43252	5.93902	7.51122	7.39005	3.65402																219	1.09346	1.48796	1.51586	1.97189	2.08745
221.1	134.899	207.166	215.326	54.7376	17.3301	-155.503	263.991	282.359	588.402	602.706	542.988	576.107	202.215		221.1	0.79319	1.82263	2.17757	2.27698	2.33831	8.71733	10.7982	2.67291	2.92788	5.93785	11.2053	9.10066	1.05845																221.1	0.720535	1.48721	2.10158	1.96815	1.50726
223.2	135.268	208.956	214.937	54.4051	17.8937	-151.356	277.191	280.49	588.905	608.167	542.373	577.241	203.698		223.2	1.15846	3.61167	1.7925	1.94074	2.88531	12.8579	23.9878	0.80723	3.43485	11.3978	10.5949	10.2443	2.54057																223.2	1.0858	3.27625	1.71651	1.63191	2.05426
225.3	135.268	207.837	214.84	54.6268	17.7528	-153.015	264.768	282.359	592.425	604.692	542.988	574.405	202.956		225.3	1.15463	2.49232	1.69862	2.1587	2.72782	11.193	11.5547	2.67915	6.95932	7.9214	11.2143	7.41859	1.7985																225.3	1.08197	2.1569	1.62263	1.84987	1.89677
227.4	135.452	207.613	215.229	54.7376	17.8937	-155.917	264.768	281.51	588.402	598.238	542.373	577.808	203.327		227.4	1.3354	2.26777	2.09015	2.26576	2.85213	8.28411	11.5447	1.83287	2.94008	1.46622	10.6039	10.8303	2.16852																227.4	1.26274	1.93235	2.01416	1.95693	2.02108
229.5	134.899	206.271	214.84	54.516	18.1755	-154.673	271.756	279.981	586.39	610.153	544.218	576.674	204.624		229.5	0.77787	0.92472	1.70507	2.04042	3.11734	9.52194	18.5226	0.30699	0.93255	13.3802	12.4532	9.70571	3.46525																229.5	0.705215	0.589302	1.62908	1.73159	2.28629
231.6	134.53	206.718	215.131	54.4051	17.1892	-154.259	266.32	281.679	586.39	605.188	538.683	576.674	203.142		231.6	0.40504	1.37136	1.9995	1.92578	2.11445	9.93046	13.0775	2.00901	0.93662	8.41427	6.92323	9.71522	1.98187																231.6	0.332385	1.03594	1.92351	1.61695	1.2834
233.7	134.714	208.061	215.131	54.6268	17.1892	-155.503	265.544	282.359	592.928	601.216	549.137	574.972	203.698		233.7	0.58571	2.71301	2.00272	2.14374	2.09786	8.68029	12.291	2.69163	7.47849	4.4414	17.3816	8.02364	2.5372																233.7	0.513055	2.37759	1.92673	1.83491	1.26681
235.8	135.268	207.166	215.131	54.4051	18.3164	-152.185	271.756	280.66	587.396	603.202	544.218	577.808	200.917		235.8	1.13548	1.81736	2.00595	1.9183	3.20847	11.9915	18.4925	0.99585	1.95055	6.42612	12.4666	10.8683	-0.24367																235.8	1.06282	1.48194	1.92996	1.60947	2.37742
237.9	135.452	206.047	214.937	55.1808	17.8937	-155.503	263.215	281.17	587.899	603.699	543.603	571.003	203.512		237.9	1.31624	0.69801	1.81507	2.69026	2.76918	8.66794	9.94161	1.50867	2.45752	6.92135	11.8562	4.07346	2.35045																237.9	1.24358	0.362592	1.73908	2.38143	1.93813
240	135.268	207.613	214.646	55.07	18.1755	-153.015	264.768	281.17	584.881	600.72	538.068	573.838	203.698		240	1.12781	2.26325	1.527	2.57572	3.03438	11.1498	11.4845	1.51179	-0.55591	3.94147	6.32617	6.91818	2.53518																240	1.05515	1.92783	1.45101	2.26689	2.20333
242.1	135.268	206.718	214.937	54.2943	17.7528	-155.503	264.768	282.699	588.905	601.713	539.298	576.674	202.956		242.1	1.12398	1.3676	1.82153	1.79628	2.59509	8.65559	11.4744	3.04391	3.47145	4.9332	7.56056	9.76279	1.7931																242.1	1.05132	1.03218	1.74554	1.48745	1.76404
244.2	133.607	206.047	215.131	53.9619	17.3301	-159.235	266.32	281.17	587.396	605.684	544.833	574.972	203.512		244.2	-0.54065	0.69575	2.01885	1.46014	2.1558	4.91732	13.0173	1.51803	1.96682	8.90372	13.0994	8.0712	2.34843																244.2	-0.613305	0.360332	1.94286	1.15131	1.32475
246.3	135.637	207.166	215.035	54.1835	17.1892	-155.088	272.532	280.49	586.39	604.195	539.298	577.241	203.512		246.3	1.48542	1.8136	1.92508	1.678	1.99831	9.05794	19.2188	0.84155	0.96509	7.41315	7.56953	10.3489	2.34776																246.3	1.41276	1.47818	1.84909	1.36917	1.16726
248.4	135.268	206.942	215.131	54.9592	18.0346	-158.405	267.097	282.019	585.887	605.684	541.143	576.107	203.698		248.4	1.11249	1.58915	2.0253	2.44996	2.82712	5.73437	13.7737	2.37377	0.46625	8.90137	9.41882	9.22433	2.53248																248.4	1.03983	1.25373	1.94931	2.14113	1.99607
250.5	135.637	206.495	215.131	54.516	17.6119	-153.844	274.085	281.51	587.396	602.706	545.448	574.405	204.439		250.5	1.47776	1.14089	2.02853	2.00302	2.38783	10.2896	20.7516	1.86719	1.97902	5.92139	13.7279	7.53274	3.27321																250.5	1.4051	0.805472	1.95254	1.69419	1.55678
252.6	135.637	207.613	215.229	54.4051	18.1755	-153.015	268.65	281.34	589.91	604.195	540.528	577.241	203.698		252.6	1.47393	2.25874	2.12885	1.88838	2.93484	11.1127	15.3065	1.70041	4.49759	7.40962	8.81289	10.3774	2.53113																252.6	1.40127	1.92332	2.05286	1.57955	2.10379
254.7	136.006	207.837	215.131	54.516	18.4573	-153.844	260.109	280.83	588.402	605.188	539.298	575.54	204.254		254.7	1.8392	2.48179	2.03498	1.99554	3.20004	10.2772	6.75558	1.19383	2.99295	8.40134	7.58747	8.68586	3.08646																254.7	1.76654	2.14637	1.95899	1.68671	2.36899
256.8	135.452	206.718	215.229	54.2943	17.8937	-154.673	263.215	281.679	587.899	606.181	544.833	579.509	202.215		256.8	1.28177	1.36234	2.1353	1.7701	2.61985	9.44167	9.85136	2.04645	2.49412	9.39317	13.1264	12.6646	1.04699																256.8	1.20911	1.02692	2.05931	1.46127	1.7888
258.9	135.821	206.942	214.452	54.9592	18.1755	-155.917	274.085	281.679	586.893	604.195	540.528	573.838	203.883		258.9	1.64694	1.58538	1.36193	2.43126	2.88506	8.1915	20.7115	2.04957	1.49239	7.40609	8.82634	7.00379	2.71441																258.9	1.57428	1.24996	1.28594	2.12243	2.05401
261	135.268	207.166	214.84	54.9592	18.0346	-150.526	268.65	279.811	586.893	603.699	542.373	574.405	203.142		261	1.08951	1.80833	1.75345	2.42753	2.72757	13.5761	15.2664	0.18389	1.49646	6.90842	10.6756	7.5803	1.97244																261	1.01685	1.47291	1.67746	2.1187	1.89652
263.1	136.191	207.389	214.84	55.1808	18.0346	-157.991	267.097	282.359	593.431	603.699	545.448	579.509	203.327		263.1	2.00837	2.03128	1.75668	2.64539	2.71098	6.10575	13.7035	2.73531	8.03832	6.90724	13.7548	12.6931	2.15706																263.1	1.93571	1.69586	1.68069	2.33656	1.87993
265.2	136.375	206.047	214.646	54.9592	17.1892	-152.185	272.532	282.189	586.39	604.195	534.379	572.704	204.624		265.2	2.18914	0.68823	1.56571	2.42005	1.84899	11.9051	19.1285	2.56853	1.00169	7.40257	2.6904	5.89823	3.45379																265.2	2.11648	0.352812	1.48972	2.11122	1.01794
267.3	135.821	207.389	215.035	54.7376	18.0346	-154.259	265.544	281.679	582.367	608.663	544.833	573.838	203.142		267.3	1.63161	2.02977	1.95733	2.19471	2.6778	9.8255	12.1305	2.06205	-3.01754	11.8696	13.1488	7.04184	1.97041																267.3	1.55895	1.69435	1.88134	1.88588	1.84675
269.4	135.821	207.389	215.326	54.2943	18.5982	-154.673	260.109	281	589.408	606.181	540.528	578.375	203.883		269.4	1.62778	2.02902	2.25176	1.74767	3.22481	9.40462	6.68539	1.38557	4.02722	9.38612	8.84877	11.5876	2.71104																269.4	1.55512	1.6936	2.17577	1.43884	2.39376
271.5	135.637	208.061	214.84	54.516	18.88	-154.673	274.085	282.189	588.402	604.195	543.603	581.777	203.142		271.5	1.43945	2.69947	1.76958	1.96563	3.49001	9.39845	20.6514	2.57789	3.02549	7.39904	11.928	14.9993	1.96907																271.5	1.36679	2.36405	1.69359	1.6568	2.65896
273.6	136.744	206.942	214.84	54.7376	18.0346	-154.259	270.979	280.32	584.378	603.699	542.988	580.076	204.995		273.6	2.54292	1.58012	1.77281	2.18349	2.62802	9.80698	17.5355	0.71221	-0.99374	6.90137	11.3174	13.3077	3.82179																273.6	2.47026	1.2447	1.69682	1.87466	1.79697
275.7	136.375	207.837	214.937	54.9592	17.8937	-157.161	260.885	280.49	587.899	602.209	537.453	575.54	202.956		275.7	2.16999	2.47426	1.87313	2.40135	2.47053	6.8981	7.4317	0.88523	2.53072	5.41089	5.78753	8.78099	1.78232																275.7	2.09733	2.13884	1.79714	2.09252	1.63948
277.8	134.899	206.942	215.229	54.9592	17.7528	-157.161	267.097	281.17	591.922	603.202	542.373	572.137	204.068		277.8	0.68976	1.57861	2.16756	2.39761	2.31304	6.89193	13.6333	1.56795	6.55799	6.40262	10.7115	5.3883	2.89374																277.8	0.617105	1.24319	2.09157	2.08878	1.48199
279.9	136.375	206.942	214.84	54.6268	17.7528	-153.015	270.979	280.32	588.402	603.202	541.143	581.21	203.142		279.9	2.16233	1.57786	1.78248	2.06147	2.29645	11.0325	17.5054	0.72157	3.04176	6.40144	9.4861	14.4703	1.96637																279.9	2.08967	1.24244	1.70649	1.75264	1.4654
282	135.452	207.613	214.355	54.9592	17.6119	-153.844	266.32	281.849	587.396	607.67	539.298	580.643	202.771		282	1.2358	2.24821	1.30031	2.39013	2.13896	10.197	12.8368	2.25379	2.04003	10.8684	7.64579	13.9128	1.595																282	1.16314	1.91279	1.22432	2.0813	1.30791
284.1	135.637	206.718	215.131	54.6268	18.1755	-153.844	265.544	283.038	588.905	602.706	540.528	578.375	204.068		284.1	1.41647	1.35256	2.08013	2.05399	2.68597	10.1908	12.0503	3.44611	3.55279	5.90259	8.88017	11.6541	2.89172																284.1	1.34381	1.01714	2.00414	1.74516	1.85492
286.2	135.821	206.718	215.035	54.6268	18.5982	-154.259	264.768	281.51	592.928	606.181	539.298	573.838	202.03		286.2	1.59713	1.3518	1.98636	2.05025	3.09207	9.76993	11.2639	1.92023	7.58016	9.37672	7.65476	7.12745	0.85225																286.2	1.52447	1.01638	1.91037	1.74142	2.26102
288.3	135.268	207.837	214.84	55.4024	18.7391	-151.771	269.426	281.849	588.402	602.706	542.988	574.972	203.883		288.3	1.0397	2.46975	1.79539	2.82211	3.21638	12.2517	15.9124	2.26315	3.05803	5.90024	11.3488	8.27097	2.70497																288.3	0.967045	2.13433	1.7194	2.51328	2.38533
290.4	134.714	206.942	215.423	54.516	18.5982	-155.088	272.532	281	587.396	602.706	543.603	576.674	204.439		290.4	0.48227	1.5741	2.38111	1.93197	3.05889	8.92828	19.0082	1.41677	2.05629	5.89907	11.9683	9.98158	3.2604																290.4	0.409615	1.23868	2.30512	1.62314	2.22784
292.5	136.744	206.942	214.743	54.0727	18.3164	-155.503	269.426	281.34	591.419	601.216	543.603	578.375	204.068		292.5	2.50844	1.57335	1.70474	1.48493	2.7605	8.50741	15.8924	1.75969	6.08356	4.40849	11.9728	11.6922	2.88902																292.5	2.43578	1.23793	1.62875	1.1761	1.92945
294.6	135.452	206.718	214.743	54.8484	18.4573	-155.917	272.532	280.83	592.425	606.677	541.758	583.478	204.068		294.6	1.21281	1.34879	1.70796	2.25689	2.88481	8.08653	18.9882	1.25311	7.09353	9.86842	10.1324	16.805	2.88835																294.6	1.14015	1.01337	1.63197	1.94806	2.05376
296.7	135.083	207.389	215.229	54.6268	18.7391	-154.259	267.097	281	589.408	602.706	541.143	572.704	204.068		296.7	0.83988	2.01924	2.19659	2.03155	3.15002	9.73906	13.543	1.42614	4.08009	5.89554	9.52199	6.04092	2.88768																296.7	0.767225	1.68382	2.1206	1.72272	2.31897
298.8	135.452	206.271	215.229	54.7376	18.4573	-153.015	264.768	281.51	587.899	602.209	540.528	575.54	202.586		298.8	1.20515	0.89989	2.19981	2.13861	2.85163	10.9769	11.2037	1.93896	2.57546	5.39797	8.91157	8.88563	1.4042																298.8	1.13249	0.564472	2.12382	1.82978	2.02058
300.9	136.744	207.613	215.035	54.9592	19.0208	-154.673	263.991	282.529	585.887	605.684	542.373	576.107	203.512		300.9	2.49312	2.24144	2.00894	2.35647	3.39854	9.31201	10.4172	2.96138	0.56793	8.87199	10.7609	9.46214	2.33023																300.9	2.42046	1.90602	1.93295	2.04764	2.56749
303	136.191	207.166	215.229	54.8484	18.5982	-154.259	268.65	282.019	584.378	602.706	540.528	573.838	203.327		303	1.93559	1.79328	2.20626	2.24193	2.95934	9.72053	15.0658	2.4549	-0.93681	5.89201	8.92054	7.20355	2.14425																303	1.86293	1.45786	2.13027	1.9331	2.12829
305.1	135.821	207.837	215.131	54.516	18.4573	-156.747	271.756	280.49	588.402	604.195	544.218	575.54	201.474		305.1	1.56266	2.46373	2.11239	1.90579	2.80185	7.22636	18.1616	0.92892	3.09056	7.38024	12.6146	8.91417	0.29008																305.1	1.49	2.12831	2.0364	1.59696	1.9708
307.2	135.821	208.956	215.131	54.4051	18.5982	-157.576	274.861	282.189	588.402	604.195	537.453	573.271	203.512		307.2	1.55883	3.58158	2.11561	1.79115	2.92616	6.39079	21.2573	2.63094	3.09463	7.37906	5.85481	6.65548	2.32821																307.2	1.48617	3.24616	2.03962	1.48232	2.09511
309.3	135.452	206.942	213.967	54.4051	18.3164	-155.503	265.544	281	588.402	604.692	538.068	573.838	204.81		309.3	1.186	1.56733	0.95394	1.78741	2.62777	8.45801	11.9299	1.44486	3.0987	7.87439	6.4742	7.23209	3.62503																309.3	1.11334	1.23191	0.877947	1.47858	1.79672
311.4	136.191	207.613	214.937	55.4024	19.4435	-152.185	273.308	282.189	586.893	600.72	541.143	572.704	202.4		311.4	1.92026	2.23767	1.92797	2.78097	3.73828	11.7692	19.6844	2.63718	1.59406	3.90151	9.55339	6.1075	1.21486																311.4	1.8476	1.90225	1.85198	2.47214	2.90723
313.5	136.191	206.942	215.229	54.0727	18.5982	-149.282	267.873	281.849	591.419	602.209	541.758	576.107	204.254		313.5	1.91643	1.56582	2.22239	1.44753	2.87639	14.6658	14.2392	2.3006	6.12423	5.38974	10.1728	9.51922	3.06758																313.5	1.84377	1.2304	2.1464	1.1387	2.04534
315.6	135.637	207.837	215.229	54.2943	18.3164	-152.6	268.65	281	586.893	603.202	542.373	573.838	204.068		315.6	1.359	2.45997	2.22562	1.66539	2.578	11.3422	15.0057	1.45422	1.6022	6.38146	10.7923	7.26063	2.88161																315.6	1.28634	2.12455	2.14963	1.35656	1.74695
317.7	136.006	207.389	215.229	55.1808	18.5982	-155.503	266.32	279.811	587.899	602.209	535.609	573.838	202.771		317.7	1.72427	2.01172	2.22884	2.54815	2.8432	8.43331	12.6663	0.26814	2.61206	5.38739	4.03244	7.27014	1.58353																317.7	1.65161	1.6763	2.15285	2.23932	2.01215
319.8	136.191	207.613	214.743	54.6268	19.0208	-155.503	269.426	282.019	592.928	600.72	543.603	573.271	202.956		319.8	1.90494	2.23466	1.74667	1.99041	3.24921	8.42714	15.762	2.47986	7.64523	3.89681	12.0311	6.71255	1.76816																319.8	1.83228	1.89924	1.67068	1.68158	2.41816
321.9	135.821	207.613	214.743	54.7376	19.1617	-155.503	277.191	282.529	585.887	602.706	536.223	577.241	203.327		321.9	1.53201	2.23391	1.74989	2.09747	3.37352	8.42097	23.5165	2.99258	0.6086	5.88144	4.65631	10.6914	2.13819																321.9	1.45935	1.89849	1.6739	1.78864	2.54247
324	136.375	206.942	215.035	55.07	19.0208	-154.673	267.097	281.51	585.384	603.699	541.758	577.241	204.439		324	2.08188	1.56206	2.04442	2.42613	3.21603	9.24409	13.4127	1.9764	0.10976	6.87316	10.1952	10.7009	3.24961																324	2.00922	1.22664	1.96843	2.1173	2.38498
326.1	136.191	207.389	215.423	54.7376	18.88	-157.576	274.085	280.32	592.425	602.706	535.609	578.375	202.215		326.1	1.89345	2.00871	2.43594	2.08999	3.05864	6.33522	20.3906	0.79022	7.15453	5.87909	4.05038	11.8444	1.02474																326.1	1.82079	1.67329	2.35995	1.78116	2.22759
328.2	136.744	207.837	214.743	55.07	18.3164	-155.917	269.426	281.51	590.916	607.67	537.453	572.137	204.254		328.2	2.44332	2.45546	1.75957	2.41865	2.47845	7.98774	15.7219	1.98264	5.6498	10.8425	5.89967	5.61661	3.06286																328.2	2.37066	2.12004	1.68358	2.10982	1.6474
330.3	135.637	207.389	215.035	55.2916	18.5982	-154.259	269.426	280.49	584.378	604.692	539.913	573.271	202.586		330.3	1.33219	2.0072	2.05409	2.63651	2.74366	9.64027	15.7119	0.96636	-0.88394	7.86264	8.36386	6.76012	1.39409																330.3	1.25953	1.67178	1.9781	2.32768	1.91261
332.4	135.821	208.732	215.131	55.1808	19.1617	-154.673	265.544	280.83	584.378	604.195	534.379	572.137	203.698		332.4	1.51286	3.34875	2.15432	2.52197	3.29057	9.21939	11.8196	1.30928	-0.87987	7.36496	2.83394	5.63563	2.50552																332.4	1.4402	3.01333	2.07833	2.21314	2.45952
334.5	136.56	207.613	215.131	54.6268	19.1617	-154.673	267.097	280.49	592.425	597.741	542.373	581.21	204.439		334.5	2.24723	2.2294	2.15755	1.96423	3.27397	9.21322	13.3625	0.9726	7.1708	0.90979	10.8326	14.7176	3.24624																334.5	2.17457	1.89398	2.08156	1.6554	2.44292
336.6	136.929	208.061	215.229	54.1835	18.88	-158.82	271.756	281.34	589.91	602.209	542.373	581.21	203.512		336.6	2.61249	2.67615	2.25787	1.51719	2.97568	5.06035	18.0112	1.82522	4.66027	5.37681	10.8371	14.7272	2.31877																336.6	2.53983	2.34073	2.18188	1.20836	2.14463
338.7	136.375	207.389	215.131	54.2943	18.88	-155.088	266.32	281.17	585.887	603.202	546.062	576.107	204.624		338.7	2.05506	2.00419	2.164	1.62425	2.95909	8.78627	12.5661	1.65844	0.64113	6.36854	14.5312	9.63337	3.43019																338.7	1.9824	1.66877	2.08801	1.31542	2.12804
340.8	135.452	208.284	214.937	54.7376	18.3164	-154.259	280.296	281.34	586.893	598.238	536.838	574.972	203.142		340.8	1.12853	2.89834	1.97312	2.06381	2.3789	9.6094	26.532	1.83146	1.651	1.40276	5.31168	8.50878	1.94682																340.8	1.05587	2.56292	1.89713	1.75498	1.54785
342.9	136.375	207.389	214.937	55.07	18.88	-157.161	270.979	281.679	587.899	603.699	540.528	572.137	204.254		342.9	2.0474	2.00269	1.97635	2.39247	2.92591	6.70052	17.2046	2.17438	2.66087	6.86259	9.00577	5.68319	3.05815																342.9	1.97474	1.66727	1.90036	2.08364	2.09486
345	136.375	208.732	214.937	55.1808	18.4573	-157.576	267.873	280.32	591.922	601.216	539.913	568.735	204.254		345	2.04357	3.34424	1.97957	2.49953	2.48662	6.27965	14.0888	0.8183	6.68813	4.37911	8.39525	2.29051	3.05747																345	1.97091	3.00882	1.90358	2.1907	1.65557
347.1	135.637	208.732	215.131	54.516	18.7391	-155.503	271.756	281.17	588.402	603.202	539.298	577.808	204.068		347.1	1.30154	3.34348	2.1769	1.83099	2.75183	8.34687	17.9611	1.67092	3.1719	6.36384	7.78484	11.3725	2.8715																347.1	1.22888	3.00806	2.10091	1.52216	1.92078
349.2	136.375	207.389	215.035	54.4051	18.88	-157.991	262.438	281.849	588.905	601.713	539.298	577.808	204.439		349.2	2.03591	2.00043	2.08312	1.71635	2.87614	5.8526	8.63362	2.35364	3.67887	4.87326	7.78933	11.382	3.24152																349.2	1.96325	1.66501	2.00713	1.40752	2.04509
351.3	136.56	206.942	215.131	54.9592	19.1617	-160.479	269.426	281	591.922	604.692	540.528	574.405	202.956		351.3	2.21658	1.55228	2.18335	2.26671	3.14124	3.35842	15.6116	1.50726	6.70033	7.85089	9.02371	7.98934	1.75805																351.3	2.14392	1.21686	2.10736	1.95788	2.31019
353.4	135.821	207.389	214.355	55.07	19.0208	-151.771	265.544	281.849	586.893	606.677	539.913	573.271	205.18		353.4	1.47455	1.99893	1.40997	2.37377	2.98375	12.0603	11.7194	2.35988	1.6754	9.83551	8.4132	6.86476	3.98157																353.4	1.40189	1.66351	1.33398	2.06494	2.1527
355.5	137.113	206.718	214.84	54.516	18.88	-155.088	277.191	282.019	585.384	606.677	542.988	576.107	202.956		355.5	2.76252	1.32697	1.8986	1.81604	2.82636	8.73688	23.356	2.5329	0.17077	9.83434	11.4924	9.70947	1.7567																355.5	2.68986	0.991552	1.82261	1.50721	1.99531
357.6	136.191	206.271	214.743	54.516	19.3026	-155.088	274.861	282.699	588.905	606.677	539.298	572.704	201.659		357.6	1.83599	0.87882	1.80473	1.8123	3.23237	8.7307	21.0166	3.21552	3.69514	9.83316	7.80727	6.31678	0.45863																357.6	1.76333	0.543402	1.72874	1.50347	2.40132
359.7	136.191	207.389	215.423	55.1808	19.5844	-153.844	266.32	282.869	588.402	604.692	536.223	576.674	203.142		359.7	1.83216	1.99667	2.48755	2.47336	3.49758	9.96853	12.4658	3.38854	3.1963	7.84618	4.73705	10.2955	1.94075																359.7	1.7595	1.66125	2.41156	2.16453	2.66653
361.8	136.929	207.389	215.035	54.8484	19.5844	-157.991	273.308	282.189	586.893	608.167	542.373	577.241	205.922		361.8	2.56652	1.99592	2.10248	2.13722	3.48099	5.81555	19.4438	2.71206	1.69167	11.3202	10.8909	10.8721	4.72028																361.8	2.49386	1.6605	2.02649	1.82839	2.64994
363.9	136.56	208.508	215.617	55.4024	19.1617	-153.015	265.544	281.849	588.905	603.202	542.373	571.003	203.327		363.9	2.19359	3.11377	2.6881	2.68748	3.0417	10.7855	11.6692	2.37548	3.70734	6.35443	10.8954	4.64422	2.1247																363.9	2.12093	2.77835	2.61211	2.37865	2.21065
366	135.821	207.613	215.131	55.1808	19.3026	-154.259	271.756	281.51	586.893	604.195	542.988	578.375	204.439		366	1.45156	2.21811	2.20593	2.46214	3.166	9.5353	17.8708	2.0388	1.6998	7.34616	11.5148	12.0251	3.23613																366	1.3789	1.88269	2.12994	2.15331	2.33495
368.1	136.191	207.389	214.937	54.7376	19.0208	-159.235	268.65	280.15	585.887	606.181	541.143	576.674	205.551		368.1	1.81683	1.99366	2.01505	2.0152	2.86761	4.55303	14.755	0.68282	0.69807	9.33088	9.6745	10.3335	4.34756																368.1	1.74417	1.65824	1.93906	1.70637	2.03656
370.2	135.821	207.389	215.035	55.2916	19.0208	-158.82	270.203	281	586.39	606.181	541.758	568.735	204.81		370.2	1.4439	1.99291	2.11538	2.56546	2.85102	4.96156	16.2978	1.53534	1.20504	9.32971	10.2939	2.40466	3.60548																370.2	1.37124	1.65749	2.03939	2.25663	2.01997
372.3	136.929	208.284	214.646	55.624	19.3026	-154.259	264.768	281.51	586.893	605.188	543.603	579.509	204.624		372.3	2.54737	2.88706	1.7302	2.89412	3.11623	9.51678	10.8527	2.04816	1.712	8.33553	12.1433	13.1878	3.41941																372.3	2.47471	2.55164	1.65421	2.58529	2.28518
374.4	136.191	208.284	214.84	55.4024	20.4298	-154.259	264.768	281.34	586.893	605.684	538.068	576.674	204.439		374.4	1.80534	2.8863	1.92763	2.66878	4.22684	9.51061	10.8427	1.88138	1.71607	8.83086	6.61325	10.3621	3.23343																374.4	1.73268	2.55088	1.85164	2.35995	3.39579
376.5	136.56	207.389	214.84	55.07	19.4435	-158.405	267.873	281.679	590.413	605.684	543.603	574.405	203.883		376.5	2.17061	1.99065	1.93085	2.33264	3.22395	5.35773	13.9383	2.2243	5.24044	8.82968	12.1522	8.1035	2.67666																376.5	2.09795	1.65523	1.85486	2.02381	2.3929
378.6	137.113	207.837	215.131	55.7348	19.1617	-154.673	267.873	279.641	591.922	604.195	540.528	572.704	202.586		378.6	2.72038	2.4374	2.22528	2.9937	2.92556	9.08356	13.9283	0.18872	6.7532	7.33911	9.08202	6.41191	1.37858																378.6	2.64772	2.10198	2.14929	2.68487	2.09451
380.7	136.191	208.284	214.549	55.1808	19.7253	-153.429	264.768	281	589.408	604.195	541.758	578.942	202.956		380.7	1.79385	2.88405	1.64601	2.43596	3.47257	10.3215	10.8126	1.55094	4.24277	7.33793	10.3163	12.6588	1.74861																380.7	1.72119	2.54863	1.57002	2.12713	2.64152
382.8	135.821	208.061	214.743	55.1808	18.4573	-156.332	263.991	281.679	586.893	606.181	536.223	572.137	204.254		382.8	1.42092	2.65959	1.84343	2.43222	2.18797	7.41251	10.0261	2.23366	1.73234	9.32266	4.7864	5.86393	3.04534																382.8	1.34826	2.32417	1.76744	2.12339	1.35692
384.9	137.113	207.613	215.035	55.07	18.7391	-153.844	270.203	281.51	587.396	605.684	544.833	572.137	204.624		384.9	2.70888	2.21134	2.13796	2.31768	2.45318	9.89444	16.2276	2.06688	2.23931	8.82498	13.4	5.87345	3.41536																384.9	2.63622	1.87592	2.06197	2.00885	1.62213
387	136.006	208.061	214.84	55.7348	19.0208	-156.747	275.638	283.208	587.899	599.727	531.919	574.972	204.439		387	1.59785	2.65809	1.94698	2.97874	2.71829	6.98556	21.6527	3.7689	2.74627	2.86621	0.49087	8.71806	3.22939																387	1.52519	2.32267	1.87099	2.66991	1.88724
389.1	136.56	208.061	215.326	55.1808	20.5707	-153.844	261.662	279.811	585.887	603.699	542.373	578.942	205.551		389.1	2.14762	2.65734	2.43561	2.421	4.2516	9.88209	7.66668	0.37422	0.73874	6.83673	10.9492	12.6969	4.34081																389.1	2.07496	2.32192	2.35962	2.11217	3.42055
391.2	135.821	206.942	214.937	55.2916	19.5844	-153.429	268.65	281.34	586.39	604.195	541.758	577.808	202.771		391.2	1.40559	1.53798	2.05053	2.52806	3.24871	10.2906	14.6447	1.90634	1.24571	7.33206	10.3387	11.5723	1.55994																391.2	1.33293	1.20256	1.97454	2.21923	2.41766
393.3	135.821	207.389	215.326	55.9564	19.0208	-154.673	267.873	281.51	584.378	606.677	542.988	577.241	203.142		393.3	1.40176	1.98463	2.44206	3.18912	2.66852	9.04034	13.8581	2.07936	-0.76193	9.81318	11.5731	11.0148	1.92997																393.3	1.3291	1.64921	2.36607	2.88029	1.83747
395.4	136.56	208.732	214.937	55.1808	19.0208	-157.991	263.991	282.529	588.905	609.16	539.913	572.704	204.439		395.4	2.13613	3.32618	2.05698	2.40978	2.65193	5.71676	9.9659	3.10178	3.76834	12.2943	8.50291	6.48801	3.22669																395.4	2.06347	2.99076	1.98099	2.10095	1.82088
397.5	135.821	207.613	214.84	54.4051	19.4435	-155.088	270.203	281	587.899	605.684	539.913	578.942	204.254		397.5	1.3941	2.20683	1.96311	1.63034	3.05803	8.61339	16.1675	1.5759	2.76661	8.81793	8.5074	12.7349	3.04062																397.5	1.32144	1.87141	1.88712	1.32151	2.22698
399.6	136.56	207.166	215.131	55.1808	19.5844	-158.405	265.544	281.17	586.39	602.209	536.223	576.674	205.551		399.6	2.12847	1.75868	2.25754	2.4023	3.18234	5.28981	11.4987	1.74893	1.26197	5.34156	4.82228	10.4762	4.33744																399.6	2.05581	1.42326	2.18155	2.09347	2.35129
401.7	135.452	207.389	214.937	55.5132	20.0071	-155.917	272.532	280.15	585.887	607.174	538.683	582.344	203.883		401.7	1.01744	1.98162	2.06666	2.73096	3.58845	7.77164	18.4767	0.73275	0.76314	10.305	7.28657	16.1562	2.66857																401.7	0.944785	1.6462	1.99067	2.42213	2.7574
403.8	136.56	207.613	215.811	55.2916	20.7116	-156.747	264.768	280.32	584.378	603.202	539.913	574.405	205.18		403.8	2.12081	2.20457	2.94359	2.50562	4.27636	6.93617	10.7023	0.90567	-0.74159	6.33211	8.52085	8.22716	3.96539																403.8	2.04815	1.86915	2.8676	2.19679	3.44531
405.9	136.006	207.613	214.84	54.7376	19.8662	-155.503	268.65	282.529	587.396	601.216	543.603	572.137	203.512		405.9	1.56338	2.20382	1.97601	1.94788	3.41437	8.17399	14.5745	3.11739	2.27997	4.34503	12.215	5.96857	2.29652																405.9	1.49072	1.8684	1.90002	1.63905	2.58332
408	136.006	207.613	214.84	55.8456	19.8662	-151.771	266.32	281.51	585.384	603.699	541.758	577.808	203.698		408	1.55955	2.20307	1.97924	3.05214	3.39778	11.8998	12.2351	2.10121	0.27244	6.82616	10.3746	11.6484	2.48125																408	1.48689	1.86765	1.90325	2.74331	2.56673
410.1	136.191	207.837	214.937	55.2916	20.0071	-156.332	273.308	281	590.916	606.677	536.838	572.704	204.624		410.1	1.74021	2.42611	2.07956	2.4944	3.52209	7.33224	19.2131	1.59463	5.80841	9.80378	5.45971	6.5546	3.40727																410.1	1.66755	2.09069	2.00357	2.18557	2.69104
412.2	137.482	207.389	215.326	55.07	19.7253	-152.185	267.873	280.83	590.413	604.692	546.062	574.972	203.883		412.2	3.02818	1.97786	2.47109	2.26906	3.2237	11.4729	13.7679	1.42785	5.30958	7.8168	14.6882	8.83221	2.6652																412.2	2.95552	1.64244	2.3951	1.96023	2.39265
414.3	136.929	206.942	214.937	55.2916	20.0071	-157.991	259.332	281.679	591.419	604.195	534.994	576.674	203.883		414.3	2.47075	1.52971	2.08601	2.48692	3.4889	5.66119	5.21695	2.28047	6.31944	7.31913	3.62388	10.5428	2.66452																414.3	2.39809	1.19429	2.01002	2.17809	2.65785
416.4	136.56	208.956	214.937	55.624	20.4298	-159.649	264.768	281.51	589.408	604.692	541.758	575.54	203.883		416.4	2.09782	3.54246	2.08924	2.81558	3.89501	3.99632	10.6421	2.11369	4.31191	7.81445	10.3926	9.41833	2.66385																416.4	2.02516	3.20704	2.01325	2.50675	3.06396
418.5	136.375	206.718	215.035	55.7348	20.148	-157.161	274.085	281	587.899	604.692	533.764	575.54	204.995		418.5	1.90949	1.3044	2.18956	2.92264	3.59662	6.47825	19.9494	1.60711	2.80728	7.81328	2.40295	9.42785	3.77528																418.5	1.83683	0.968982	2.11357	2.61381	2.76557
420.6	136.56	206.718	215.229	56.0672	19.3026	-156.332	264.768	281.34	588.402	602.706	539.913	572.137	204.254		420.6	2.09016	1.30365	2.38689	3.2513	2.73463	7.30137	10.6221	1.95003	3.31424	5.8262	8.55674	6.03516	3.0332																420.6	2.0175	0.968232	2.3109	2.94247	1.90358
422.7	135.637	208.284	215.229	55.2916	19.4435	-155.088	260.109	282.189	587.899	602.706	541.758	577.808	204.624		422.7	1.16363	2.869	2.39012	2.47196	2.85894	8.5393	5.95333	2.80255	2.81541	5.82503	10.406	11.715	3.40323																422.7	1.09097	2.53358	2.31413	2.16313	2.02789
424.8	136.191	208.061	214.84	55.2916	20.0071	-155.088	270.203	281.51	588.905	601.713	537.453	576.107	202.03		424.8	1.7134	2.64455	2.00504	2.46822	3.40595	8.53312	16.0371	2.12617	3.82528	4.83095	6.10601	10.0234	0.80775																424.8	1.64074	2.30913	1.92905	2.15939	2.5749
426.9	136.191	208.061	214.84	55.8456	20.148	-157.161	263.991	280.32	588.402	604.195	542.373	572.704	204.81		426.9	1.70957	2.64379	2.00827	3.01848	3.53026	6.45355	9.81548	0.93999	3.32644	7.31208	11.03	6.6307	3.58728																426.9	1.63691	2.30837	1.93228	2.70965	2.69921
429	136.56	208.508	214.743	55.4024	20.0071	-158.405	263.215	281	590.413	600.72	547.907	574.405	203.883		429	2.07484	3.09044	1.91439	2.57154	3.37276	5.20337	9.02905	1.62271	5.34211	3.8357	16.5689	8.34131	2.65981																429	2.00218	2.75502	1.8384	2.26271	2.54171
431.1	136.744	208.284	215.035	55.8456	20.4298	-155.088	267.873	281.17	587.899	606.181	541.143	579.509	202.4		431.1	2.25561	2.86599	2.20892	3.011	3.77887	8.5146	13.6776	1.79573	2.83168	9.29563	9.80906	13.4541	1.17643																431.1	2.18295	2.53057	2.13293	2.70217	2.94782
433.2	135.821	208.284	215.035	55.5132	20.2889	-154.673	272.532	281.51	584.881	602.209	541.143	572.704	204.068		433.2	1.32898	2.86524	2.21214	2.67486	3.62138	8.92303	18.3263	2.13865	-0.18176	5.32275	9.81355	6.65924	2.84386																433.2	1.25632	2.52982	2.13615	2.36603	2.79033
435.3	136.191	207.166	214.646	55.624	19.8662	-153.844	273.308	281.17	589.408	601.216	538.683	577.241	204.068		435.3	1.69424	1.74588	1.82697	2.78192	3.18209	9.74625	19.0928	1.80197	4.34851	4.32858	7.35834	11.205	2.84318																435.3	1.62158	1.41046	1.75098	2.47309	2.35104
437.4	136.744	208.284	214.84	55.2916	20.148	-156.332	274.085	281.51	588.905	605.188	538.068	575.54	202.956		437.4	2.24411	2.86373	2.02439	2.44578	3.4473	7.25198	19.8591	2.14489	3.84968	8.2991	6.74782	9.51346	1.73041																437.4	2.17145	2.52831	1.9484	2.13695	2.61625
439.5	136.744	208.732	214.937	54.7376	20.5707	-159.235	269.426	280.66	590.916	605.188	535.609	577.241	204.624		439.5	2.24028	3.31038	2.12472	1.88804	3.85341	4.3431	15.1904	1.29851	5.86535	8.29793	4.29261	11.2241	3.39783																439.5	2.16762	2.97496	2.04873	1.57921	3.02236
441.6	137.298	205.823	215.52	54.8484	20.148	-157.576	263.215	279.811	590.413	602.706	543.603	575.54	204.624		441.6	2.79005	0.40133	2.71044	1.9951	3.41412	5.99563	8.96888	0.45223	5.36651	5.81445	12.2913	9.53249	3.39716																441.6	2.71739	0.0659124	2.63445	1.68627	2.58307
443.7	136.929	207.389	214.937	55.8456	20.2889	-150.526	267.873	281	585.887	603.202	546.062	579.509	202.03		443.7	2.41712	1.96658	2.13117	2.98856	3.53843	13.0389	13.6174	1.64455	0.84448	6.30978	14.7555	13.5112	0.80169																443.7	2.34446	1.63116	2.05518	2.67973	2.70738
445.8	137.298	207.837	215.229	55.5132	20.2889	-157.991	276.414	280.49	584.378	608.167	535.609	580.076	202.586		445.8	2.78239	2.41332	2.4256	2.65242	3.52183	5.56858	22.1483	1.13797	-0.66025	11.2732	4.30606	14.0877	1.35701																445.8	2.70973	2.0779	2.34961	2.34359	2.69078
447.9	136.744	208.508	215.131	55.9564	20.148	-156.747	267.097	280.49	588.905	605.188	534.994	572.137	204.81		447.9	2.22496	3.08367	2.33172	3.09188	3.36434	6.80651	12.821	1.14109	3.87001	8.29323	3.69565	6.15882	3.58054																447.9	2.1523	2.74825	2.25573	2.78305	2.53329
450	136.929	207.837	215.131	55.4024	20.2889	-159.649	268.65	281	585.887	605.684	539.913	570.436	204.439		450	2.40563	2.41182	2.33495	2.53414	3.48865	3.89753	14.3639	1.65391	0.85668	8.78855	8.61954	4.46724	3.20916																450	2.33297	2.0764	2.25896	2.22531	2.6576
452.1	136.375	208.956	215.423	55.8456	20.5707	-158.82	270.203	281.34	588.905	600.72	539.913	574.972	205.18		452.1	1.8482	3.52967	2.62947	2.97361	3.75386	4.72076	15.9067	1.99683	3.87815	3.82278	8.62402	9.01295	3.94989																452.1	1.77554	3.19425	2.55348	2.66478	2.92281
454.2	137.298	208.508	215.423	55.8456	20.2889	-154.673	271.756	279.131	585.887	605.684	542.988	574.972	204.254		454.2	2.76707	3.08141	2.6327	2.96987	3.45547	8.86128	17.4496	-0.20865	0.86481	8.7862	11.7032	9.02246	3.02242																454.2	2.69441	2.74599	2.55671	2.66104	2.62442
456.3	136.56	208.061	215.131	56.0672	20.2889	-153.429	274.085	281.51	589.91	605.188	538.683	574.405	204.254		456.3	2.02504	2.63326	2.34462	3.18773	3.43888	10.0992	19.7689	2.17297	4.89208	8.28853	7.40319	8.46497	3.02174																456.3	1.95238	2.29784	2.26863	2.8789	2.60783
458.4	136.191	208.956	214.743	56.5104	21.1343	-158.405	270.203	282.189	592.928	603.699	539.913	574.972	203.327		458.4	1.6521	3.52741	1.95955	3.62719	4.26769	5.11693	15.8767	2.85559	7.91365	6.79795	8.63748	9.04149	2.09437																458.4	1.57944	3.19199	1.88356	3.31836	3.43664
460.5	136.375	208.284	214.937	55.2916	20.4298	-156.747	267.873	282.529	585.887	605.684	541.143	578.375	203.142		460.5	1.83287	2.85546	2.15697	2.40465	3.54659	6.76946	13.5372	3.19851	0.87702	8.78268	9.87186	12.4532	1.90839																460.5	1.76021	2.52004	2.08098	2.09582	2.71554
462.6	137.298	207.166	214.937	55.2916	19.8662	-155.503	278.744	281.51	586.893	605.684	536.838	576.674	203.698		462.6	2.75174	1.7361	2.1602	2.40091	2.9664	8.00728	24.3975	2.18233	1.88688	8.7815	5.57185	10.7616	2.46372																462.6	2.67908	1.40068	2.08421	2.09208	2.13535
464.7	137.113	207.837	215.229	55.8456	20.2889	-157.161	266.32	283.038	585.887	605.684	542.988	574.405	203.142		464.7	2.56331	2.40655	2.45462	2.95117	3.37251	6.34241	11.9644	3.71445	0.88515	8.78033	11.7256	8.50303	1.90704																464.7	2.49065	2.07113	2.37863	2.64234	2.54146
466.8	136.56	208.732	215.326	55.9564	20.4298	-155.917	270.979	281.849	589.408	605.188	539.298	582.344	205.366		466.8	2.00588	3.3006	2.55495	3.05823	3.49682	7.58024	16.6129	2.52837	4.40952	8.28265	8.04052	16.451	4.13047																466.8	1.93322	2.96518	2.47896	2.7494	2.66577
468.9	137.113	209.403	215.326	55.624	20.4298	-157.161	270.203	280.15	587.899	603.699	538.683	571.003	202.956		468.9	2.55565	3.97105	2.55818	2.72209	3.48023	6.33006	15.8265	0.83259	2.90488	6.79207	7.43011	5.11985	1.7203																468.9	2.48299	3.63563	2.48219	2.41326	2.64918
471	136.56	209.179	214.743	55.4024	20.9934	-154.673	268.65	282.189	590.916	604.195	538.683	576.674	203.698		471	1.99822	3.74659	1.9789	2.49675	4.02724	8.81189	14.2636	2.87431	5.92635	7.2874	7.43459	10.7997	2.46102																471	1.92556	3.41117	1.90291	2.18792	3.19619
473.1	137.298	208.956	215.229	55.8456	21.6979	-156.332	273.308	281.679	584.378	602.706	546.677	574.972	203.512		473.1	2.73259	3.52214	2.46753	2.93621	4.71515	7.14701	18.9123	2.36783	-0.60738	5.79682	15.4332	9.10808	2.27495																473.1	2.65993	3.18672	2.39154	2.62738	3.8841
475.2	137.482	208.284	215.52	55.5132	20.7116	-156.332	265.544	279.981	588.905	604.195	537.453	575.54	203.698		475.2	2.91326	2.85019	2.76205	2.60007	3.71226	7.14084	11.1377	0.67205	3.92288	7.28505	6.21366	9.68469	2.45967																475.2	2.8406	2.51477	2.68606	2.29124	2.88121
477.3	137.113	207.613	215.035	56.2888	20.5707	-153.844	269.426	283.208	587.396	604.195	541.143	578.942	204.068		477.3	2.54033	2.17824	2.27988	3.37193	3.55476	9.62276	15.0099	3.90307	2.41825	7.28387	9.90775	13.0964	2.8297																477.3	2.46767	1.84282	2.20389	3.0631	2.72371
479.4	136.375	207.613	214.84	55.9564	20.4298	-151.356	267.873	280.32	586.39	603.202	540.528	574.972	201.844		479.4	1.7984	2.17749	2.0889	3.03579	3.39727	12.1046	13.447	1.01799	1.41652	6.2898	9.29733	9.13661	0.60483																479.4	1.72574	1.84207	2.01291	2.72696	2.56622
481.5	136.56	208.508	215.52	55.624	21.1343	-157.576	270.979	281.849	585.887	604.195	538.068	575.54	203.327		481.5	1.97907	3.07163	2.77173	2.69965	4.08518	5.87832	16.5428	2.55021	0.91768	7.28152	6.84202	9.71323	2.08695																481.5	1.90641	2.73621	2.69574	2.39082	3.25413
483.6	137.482	208.284	214.937	55.624	20.8525	-151.356	267.873	280.32	585.887	602.706	537.453	574.405	202.956		483.6	2.89793	2.84718	2.19245	2.69591	3.78679	12.0922	13.4269	1.02423	0.92175	5.79095	6.23161	8.58864	1.71558																483.6	2.82527	2.51176	2.11646	2.38708	2.95574
485.7	136.006	207.389	215.131	55.7348	20.4298	-157.161	269.426	281	588.402	602.209	537.453	573.838	202.586		485.7	1.4178	1.95153	2.38978	2.80297	3.3475	6.28067	14.9698	1.70695	3.44032	5.29337	6.23609	8.03115	1.3442																485.7	1.34514	1.61611	2.31379	2.49414	2.51645
487.8	136.191	207.613	215.423	55.7348	20.8525	-156.747	271.756	281.17	587.396	605.188	534.379	577.241	203.142		487.8	1.59847	2.17448	2.6843	2.79923	3.75361	6.68919	17.2892	1.87997	2.43859	8.2709	3.16588	11.4429	1.89963																487.8	1.52581	1.83906	2.60831	2.4904	2.92256
489.9	136.744	207.389	214.743	55.4024	20.9934	-155.503	270.979	280.83	589.408	607.67	536.838	574.405	203.512		489.9	2.14834	1.95002	2.00793	2.46309	3.87792	7.92702	16.5026	1.54329	4.45425	10.752	5.63016	8.61718	2.26955																489.9	2.07568	1.6146	1.93194	2.15426	3.04687
492	136.375	207.389	215.229	55.5132	21.2752	-155.088	277.967	280.66	587.396	603.699	540.528	573.838	203.142		492	1.77541	1.94927	2.49656	2.57015	4.14312	8.33554	23.4806	1.37651	2.44672	6.77915	9.32425	8.05969	1.89828																492	1.70275	1.61385	2.42057	2.26132	3.31207
494.1	136.191	208.508	214.549	55.624	20.7116	-157.991	269.426	281	586.39	603.202	538.683	575.54	204.624		494.1	1.58698	3.06712	1.82018	2.67721	3.56293	5.42657	14.9297	1.71943	1.44499	6.28157	7.48393	9.7703	3.38031																494.1	1.51432	2.7317	1.74419	2.36838	2.73188
496.2	136.375	207.389	214.937	56.2888	20.5707	-156.332	268.65	281.17	585.384	606.181	541.143	572.137	205.551		496.2	1.76775	1.94777	2.21181	3.33827	3.40544	7.0791	14.1433	1.89245	0.44325	9.2592	9.94812	6.37761	4.30643																496.2	1.69509	1.61235	2.13582	3.02944	2.57439
498.3	136.744	207.837	215.229	56.178	20.7116	-153.844	270.203	281.17	587.899	609.16	539.913	576.107	202.771		498.3	2.13302	2.39451	2.50623	3.22373	3.52975	9.56102	15.6861	1.89557	2.96182	12.2367	8.7227	10.3563	1.52556																498.3	2.06036	2.05909	2.43024	2.9149	2.6987
500.4	135.821	207.166	215.035	55.624	20.9934	-155.917	263.991	280.66	591.419	604.195	544.833	574.405	203.142		500.4	1.20639	1.72256	2.31536	2.66599	3.79496	7.48145	9.46449	1.38899	6.48619	7.27095	13.6467	8.66474	1.89558																500.4	1.13373	1.38714	2.23937	2.35716	2.96391
502.5	136.006	208.061	214.937	55.624	20.8525	-155.917	272.532	281.849	585.887	605.684	540.528	573.838	203.327		502.5	1.38716	2.61671	2.22148	2.66225	3.63747	7.47527	17.9954	2.58141	0.95835	8.75917	9.34668	8.10725	2.08021																502.5	1.3145	2.28129	2.14549	2.35342	2.80642
504.6	136.744	208.508	215.035	56.178	20.7116	-158.82	273.308	280.83	586.893	608.167	539.913	574.405	204.254		504.6	2.12153	3.06336	2.32181	3.21251	3.47998	4.5664	18.7618	1.56514	1.96822	11.2403	8.73616	8.68376	3.00624																504.6	2.04887	2.72794	2.24582	2.90368	2.64893
506.7	135.821	208.284	215.035	56.178	20.2889	-160.064	267.873	281.51	590.916	603.699	539.298	577.241	203.698		506.7	1.1949	2.8389	2.32503	3.20877	3.04069	3.31622	13.3166	2.24786	5.99549	6.77092	8.12575	11.5285	2.44956																506.7	1.12224	2.50348	2.24904	2.89994	2.20964
508.8	136.006	209.179	215.035	55.7348	20.7116	-155.917	267.097	280.49	587.899	605.188	536.838	573.838	202.586		508.8	1.37566	3.73305	2.32826	2.76183	3.44679	7.45675	12.5302	1.23158	2.98215	8.25915	5.67053	8.13579	1.33679																508.8	1.303	3.39763	2.25227	2.453	2.61574
510.9	137.298	207.613	215.035	55.1808	21.1343	-157.161	268.65	279.811	587.899	604.692	538.068	576.674	203.142		510.9	2.66363	2.1662	2.33148	2.20409	3.8529	6.20658	14.0731	0.5552	2.98622	7.76157	6.90482	10.9804	1.89221																510.9	2.59097	1.83078	2.25549	1.89526	3.02185
513	136.191	207.613	214.84	55.8456	21.1343	-158.82	269.426	280.83	587.396	609.16	539.913	574.405	202.215		513	1.5525	2.16545	2.14051	2.86515	3.83631	4.5417	14.8394	1.57762	2.48739	12.2285	8.7541	8.72182	0.96474																513	1.47984	1.83003	2.06452	2.55632	3.00526
515.1	135.637	208.508	215.131	55.624	21.2752	-155.917	274.861	281	588.905	604.692	538.068	573.271	203.698		515.1	0.99507	3.0596	2.43494	2.63981	3.96062	7.43823	20.2645	1.75064	4.00016	7.75922	6.91379	7.59723	2.44687																515.1	0.922415	2.72418	2.35895	2.33098	3.12957
517.2	137.113	208.061	215.131	55.2916	21.9796	-155.503	267.097	282.529	589.408	600.72	541.143	574.405	202.771		517.2	2.46754	2.61144	2.43816	2.30367	4.64843	7.84675	12.4901	3.28276	4.50712	3.78635	9.99297	8.74084	1.51949																517.2	2.39488	2.27602	2.36217	1.99484	3.81738
519.3	138.036	207.389	214.937	56.3996	21.1343	-154.673	267.097	280.66	586.893	604.195	534.379	577.241	203.512		519.3	3.38641	1.93949	2.24729	3.40793	3.78654	8.66988	12.48	1.41708	1.99669	7.26037	3.23316	11.5855	2.26012																519.3	3.31375	1.60407	2.1713	3.0991	2.95549
521.4	137.667	207.389	215.423	56.5104	21.1343	-156.747	271.756	282.189	585.384	602.209	538.068	575.54	203.142		521.4	3.01358	1.93874	2.73591	3.51499	3.76995	6.5904	17.1287	2.9492	0.49206	5.27339	6.92725	9.89397	1.88884																521.4	2.94092	1.60332	2.65992	3.20616	2.9389
523.5	136.744	207.837	214.937	55.9564	22.5432	-160.064	274.085	282.529	583.875	602.209	535.609	580.076	202.956		523.5	2.08705	2.38549	2.25374	2.95725	5.16225	3.26683	19.448	3.29212	-1.01268	5.27222	4.47203	14.4397	1.70277																523.5	2.01439	2.05007	2.17775	2.64842	4.3312
525.6	137.482	207.389	215.423	55.8456	21.2752	-156.332	275.638	279.981	587.396	604.195	539.913	577.808	204.439		525.6	2.82132	1.93723	2.74236	2.84271	3.87766	6.99265	20.9908	0.74694	2.51179	7.25684	8.78102	12.1811	3.18489																525.6	2.74866	1.60181	2.66637	2.53388	3.04661
527.7	136.56	208.284	214.937	56.0672	21.1343	-153.844	267.873	280.83	585.384	603.202	534.379	574.405	202.586		527.7	1.89479	2.83138	2.26019	3.06057	3.72017	9.47458	13.2163	1.59946	0.50426	6.26277	3.2511	8.7884	1.33072																527.7	1.82213	2.49596	2.1842	2.75174	2.88912
529.8	136.375	208.061	214.937	55.8456	21.1343	-156.747	274.085	280.32	588.905	603.699	541.758	576.674	202.956		529.8	1.70646	2.60693	2.26341	2.83523	3.70358	6.56571	19.4179	1.09288	4.02862	6.75799	10.6348	11.066	1.70075																529.8	1.6338	2.27151	2.18742	2.5264	2.87253
531.9	136.929	207.166	215.131	56.178	20.7116	-158.405	268.65	281.679	584.378	605.684	541.143	572.137	204.995		531.9	2.25623	1.71128	2.46074	3.16389	3.26429	4.90083	13.9728	2.4552	-0.49351	8.74272	10.0244	6.53933	3.73887																531.9	2.18357	1.37586	2.38475	2.85506	2.43324
534	136.929	206.942	215.035	56.0672	21.6979	-157.991	272.532	281.34	583.875	606.677	539.913	571.57	204.068		534	2.25239	1.48682	2.36696	3.04935	4.234	5.30926	17.8449	2.11852	-0.99234	9.73444	8.79896	5.98174	2.8115																534	2.17973	1.1514	2.29097	2.74052	3.40295
536.1	136.375	208.061	214.355	56.2888	21.6979	-154.673	268.65	281.679	589.91	604.692	542.988	571.57	205.366		536.1	1.69496	2.60467	1.69059	3.26721	4.21741	8.62048	13.9527	2.46144	5.04663	7.74747	11.8781	5.99125	4.10822																536.1	1.6223	2.26925	1.6146	2.95838	3.38636
538.2	136.375	207.837	215.131	56.0672	21.1343	-155.088	273.308	280.15	591.419	605.684	540.528	577.808	202.956		538.2	1.69113	2.38022	2.47042	3.04187	3.63722	8.19971	18.6014	0.93556	6.55939	8.73919	9.42293	12.2382	1.69805																538.2	1.61847	2.0448	2.39443	2.73304	2.80617
540.3	136.56	208.508	215.229	56.0672	21.1343	-154.673	276.414	281.17	588.402	603.202	537.453	574.972	203.142		540.3	1.8718	3.05057	2.57074	3.03813	3.62062	8.60813	21.6971	1.95798	3.54606	6.25572	6.35272	9.41248	1.88278																540.3	1.79914	2.71515	2.49475	2.7293	2.78957
542.4	135.452	208.061	215.714	56.2888	21.557	-157.576	272.532	282.529	586.39	603.202	539.913	573.271	202.956		542.4	0.76077	2.60241	3.05937	3.25599	4.02673	5.69926	17.8048	3.3202	1.53853	6.25454	8.8169	7.72089	1.6967																542.4	0.688115	2.26699	2.98338	2.94716	3.19568
544.5	137.113	207.166	214.743	55.7348	22.1205	-155.088	270.979	282.189	587.396	603.699	544.218	575.54	203.512		544.5	2.41774	1.70676	2.09179	2.69825	4.57364	8.18119	16.2419	2.98352	2.54839	6.74977	13.126	9.9986	2.25203																544.5	2.34508	1.37134	2.0158	2.38942	3.74259
546.6	137.851	207.166	215.131	55.8456	21.8388	-156.747	270.979	280.32	585.887	603.202	538.068	577.808	204.254		546.6	3.15211	1.70601	2.48332	2.80532	4.27535	6.51631	16.2319	1.11784	1.04376	6.25219	6.98107	12.2762	2.99275																546.6	3.07945	1.37059	2.40733	2.49649	3.4443
548.7	137.298	207.166	214.549	56.5104	22.1205	-159.235	267.097	280.83	591.419	604.195	534.994	573.838	204.439		548.7	2.59468	1.70526	1.90404	3.46638	4.54046	4.02204	12.3397	1.63066	6.57973	7.24392	3.91096	8.31653	3.17748																548.7	2.52202	1.36984	1.82805	3.15755	3.70941
550.8	137.482	208.061	214.84	56.3996	20.9934	-158.82	270.979	280.83	585.887	601.713	539.913	572.704	204.068		550.8	2.77535	2.5994	2.19857	3.35184	3.39677	4.43056	16.2118	1.63378	1.05189	4.76044	8.83484	7.19194	2.8061																550.8	2.70269	2.26398	2.12258	3.04301	2.56572
552.9	137.482	208.508	214.937	56.6212	21.6979	-157.161	271.756	282.189	587.396	601.216	540.528	576.674	204.439		552.9	2.77152	3.04605	2.29889	3.5697	4.08468	6.08309	16.9783	2.996	2.56466	4.26277	9.45433	11.1707	3.17613																552.9	2.69886	2.71063	2.2229	3.26087	3.25363
555	137.298	207.613	214.84	56.8429	21.557	-155.503	268.65	279.981	588.402	602.209	538.068	574.405	204.068		555	2.58319	2.1504	2.20502	3.78766	3.92718	7.73561	13.8625	0.79062	3.57453	5.25459	6.99902	8.91207	2.80476																555	2.51053	1.81498	2.12903	3.47883	3.09613
557.1	136.744	208.061	214.937	57.0645	22.5432	-154.259	272.532	280.15	585.887	606.677	536.838	572.137	204.995		557.1	2.02575	2.59715	2.30534	4.00552	4.89679	8.97344	17.7346	0.96364	1.06409	9.72152	5.7737	6.65348	3.73078																557.1	1.95309	2.26173	2.22935	3.69669	4.06574
559.2	136.744	208.508	214.452	55.7348	21.557	-158.405	272.532	280.49	590.916	601.216	538.068	569.302	201.288		559.2	2.02192	3.0438	1.82317	2.67208	3.894	4.82057	17.7246	1.30646	6.09716	4.25924	7.00799	3.82779	0.02321																559.2	1.94926	2.70838	1.74718	2.36325	3.06295
561.3	137.113	207.389	214.743	56.178	21.9796	-155.917	271.756	280.49	585.384	603.699	542.988	578.942	202.215		561.3	2.38709	1.92444	2.1176	3.11154	4.30001	7.30239	16.9382	1.30958	0.56933	6.74037	11.932	13.4769	0.94923																561.3	2.31443	1.58902	2.04161	2.80271	3.46896
563.4	136.56	208.061	215.131	56.0672	21.557	-154.673	271.756	280.83	587.899	600.223	536.838	575.54	204.439		563.4	1.82966	2.59489	2.50912	2.997	3.86082	8.54022	16.9281	1.6525	3.0879	3.26399	5.78716	10.0842	3.17276																563.4	1.757	2.25947	2.43313	2.68817	3.02977
565.5	137.298	209.403	214.84	55.9564	22.1205	-157.161	270.979	280.32	587.396	605.684	536.223	569.302	204.254		565.5	2.56403	3.93644	2.22115	2.88246	4.40773	6.04604	16.1416	1.14592	2.58906	8.72392	5.17664	3.85633	2.98669																565.5	2.49137	3.60102	2.14516	2.57363	3.57668
567.6	137.113	208.508	214.937	56.0672	21.9796	-157.576	268.65	281.679	589.408	605.188	541.143	577.808	203.512		567.6	2.3756	3.04079	2.32147	2.98952	4.25024	5.62517	13.8023	2.50824	4.60473	8.22624	10.1006	12.3713	2.24461																567.6	2.30294	2.70537	2.24548	2.68069	3.41919
569.7	137.298	206.942	214.743	55.8456	22.1205	-154.259	275.638	281.17	584.378	604.692	539.298	576.674	203.883		569.7	2.55637	1.47403	2.1305	2.76418	4.37455	8.93639	20.7803	2.00166	-0.4203	7.72867	8.26032	11.2468	2.61464																569.7	2.48371	1.13861	2.05451	2.45535	3.5435
571.8	136.375	207.389	214.743	55.9564	22.5432	-154.673	276.414	279.471	583.373	607.174	542.988	572.137	205.18		571.8	1.62984	1.92068	2.13372	2.87124	4.78065	8.51552	21.5466	0.30588	-1.42204	10.2098	11.9544	6.72007	3.91146																571.8	1.55718	1.58526	2.05773	2.56241	3.9496
573.9	136.929	207.389	214.743	56.2888	22.2614	-157.576	276.414	281.51	589.408	602.209	540.528	580.076	203.142		573.9	2.17961	1.91993	2.13695	3.1999	4.48226	5.60665	21.5366	2.3477	4.61693	5.24402	9.49919	14.668	1.87199																573.9	2.10695	1.58451	2.06096	2.89107	3.65121
576	136.929	206.942	215.229	56.3996	22.2614	-157.576	276.414	280.83	587.899	600.72	541.758	578.942	203.142		576	2.17578	1.47178	2.62557	3.30696	4.46567	5.60047	21.5266	1.67122	3.1123	3.75344	10.7335	13.5435	1.87131																576	2.10312	1.13636	2.54958	2.99813	3.63462
578.1	137.298	209.85	214.937	56.6212	22.2614	-157.991	268.65	281.34	590.413	603.699	533.764	577.241	202.956		578.1	2.54105	4.37932	2.3376	3.52482	4.44908	5.1796	13.7522	2.18404	5.63086	6.73096	2.74386	11.8519	1.68524																578.1	2.46839	4.0439	2.26161	3.21599	3.61803
580.2	137.851	208.061	215.035	56.178	22.2614	-152.6	274.861	281.679	585.384	603.699	538.068	573.838	203.327		580.2	3.09082	2.58887	2.43792	3.07788	4.43249	10.5642	19.9536	2.52696	0.60593	6.72979	7.05284	8.45922	2.05527																580.2	3.01816	2.25345	2.36193	2.76905	3.60144
582.3	137.298	207.389	215.326	55.9564	22.2614	-157.161	277.191	281.849	586.39	606.677	542.988	571.57	204.068		582.3	2.53338	1.91692	2.73235	2.85254	4.4159	5.99665	22.273	2.69998	1.6158	9.70741	11.9768	6.20053	2.79599																582.3	2.46072	1.5815	2.65636	2.54371	3.58485
584.4	138.405	208.061	214.743	55.7348	22.1205	-154.259	276.414	281.51	587.396	606.181	538.068	573.838	203.883		584.4	3.63675	2.58737	2.15308	2.6272	4.25841	8.89317	21.4865	2.3633	2.62566	9.20984	7.06181	8.47824	2.60992																584.4	3.56409	2.25195	2.07709	2.31837	3.42736
586.5	137.667	208.508	214.937	55.7348	22.825	-153.429	267.097	281.17	588.402	601.713	537.453	571.003	203.883		586.5	2.89482	3.03401	2.3505	2.62346	4.94631	9.7164	12.1591	2.02662	3.63553	4.74046	6.4514	5.65256	2.60924																586.5	2.82216	2.69859	2.27451	2.31463	4.11526
588.6	137.667	207.613	215.326	56.0672	21.6979	-158.82	270.203	281.17	588.905	602.706	538.068	576.674	204.81		588.6	2.89099	2.13836	2.74203	2.95212	3.80262	4.31942	15.2549	2.02974	4.1425	5.73219	7.07079	11.3324	3.53537																588.6	2.81833	1.80294	2.66604	2.64329	2.97157
590.7	136.929	207.166	214.743	56.0672	21.557	-155.917	271.756	280.66	580.858	606.181	536.838	570.436	202.956		590.7	2.14896	1.69021	2.16275	2.94838	3.64513	7.21595	16.7978	1.52316	-3.89993	9.20631	5.84547	5.10458	1.6812																590.7	2.0763	1.35479	2.08676	2.63955	2.81408
592.8	137.851	208.284	214.452	56.5104	22.2614	-152.185	267.873	281.17	587.899	603.202	540.528	569.302	202.771		592.8	3.06783	2.80806	1.87478	3.38784	4.33294	10.9419	12.9055	2.03598	3.14483	6.22634	9.53956	3.97999	1.49522																592.8	2.99517	2.47264	1.79879	3.07901	3.50189
594.9	137.298	207.389	214.84	56.732	21.9796	-155.917	262.438	281.51	587.396	599.231	538.683	569.302	204.068		594.9	2.5104	1.91241	2.2663	3.6057	4.03455	7.2036	7.46033	2.3789	2.646	2.25346	7.69924	3.98951	2.79195																594.9	2.43774	1.57699	2.19031	3.29687	3.2035
597	137.298	207.837	215.131	56.3996	21.6979	-159.235	270.979	280.66	585.384	604.195	536.838	577.808	203.883		597	2.50657	2.35915	2.56073	3.26956	3.73626	3.88003	15.9912	1.53252	0.63847	7.21689	5.85893	12.5045	2.60587																597	2.43391	2.02373	2.48474	2.96073	2.90521
599.1	137.298	208.732	214.84	56.6212	21.9796	-157.161	271.756	279.811	590.413	605.188	542.988	571.003	203.883		599.1	2.50274	3.2532	2.27275	3.48742	4.00137	5.94725	16.7577	0.68624	5.67153	8.20861	12.0127	5.70963	2.6052																599.1	2.43008	2.91778	2.19676	3.17859	3.17032
601.2	136.929	207.837	215.229	56.2888	22.2614	-157.576	274.085	281.17	589.408	600.72	541.758	573.271	203.327		601.2	2.12981	2.35765	2.66428	3.15128	4.26658	5.52638	19.0769	2.04846	4.6698	3.73934	10.7873	7.98725	2.04853																601.2	2.05715	2.02223	2.58829	2.84245	3.43553
603.3	137.482	208.061	215.326	55.9564	22.1205	-159.235	271.756	282.019	581.864	606.677	537.453	576.674	202.956		603.3	2.67958	2.5806	2.7646	2.81514	4.10908	3.8615	16.7376	2.90108	-2.86973	9.69566	6.48728	11.399	1.67715																603.3	2.60692	2.24518	2.68861	2.50631	3.27803
605.4	137.298	208.061	214.743	56.9537	22.1205	-160.064	271.756	282.699	588.402	601.216	536.223	573.271	203.698		605.4	2.49125	2.57984	2.18533	3.8087	4.09249	3.02603	16.7276	3.5837	3.67213	4.23339	5.26187	8.00627	2.41788																605.4	2.41859	2.24442	2.10934	3.49987	3.26144
607.5	137.482	208.508	214.452	56.3996	22.2614	-157.991	266.32	281.51	585.384	602.706	536.838	571.003	201.659		607.5	2.67191	3.02649	1.89736	3.25086	4.2168	5.09316	11.2825	2.39763	0.6588	5.72161	5.88136	5.74768	0.3784																607.5	2.59925	2.69107	1.82137	2.94203	3.38575
609.6	137.851	207.837	214.937	56.3996	21.9796	-160.893	271.756	281.51	589.408	607.174	541.758	571.003	203.883		609.6	3.03718	2.35464	2.38598	3.24712	3.91841	2.18428	16.7075	2.40075	4.68607	10.1886	10.8052	5.7572	2.60183																609.6	2.96452	2.01922	2.30999	2.93829	3.08736
611.7	137.667	208.061	214.743	55.9564	21.6979	-156.747	276.414	281.51	583.875	603.202	536.223	570.436	203.883		611.7	2.84885	2.57759	2.19501	2.80018	3.62012	6.32491	21.3561	2.40387	-0.84186	6.21576	5.27533	5.19971	2.60115																611.7	2.77619	2.24217	2.11902	2.49135	2.78907
613.8	136.929	207.613	214.743	56.0672	22.2614	-159.235	267.097	281.17	588.402	604.195	539.298	574.972	204.995		613.8	2.10682	2.12933	2.19823	2.90724	4.16703	3.83063	12.0288	2.06719	3.6884	7.20749	8.35451	9.74542	3.71258																613.8	2.03416	1.79391	2.12224	2.59841	3.33598
615.9	137.482	208.061	214.937	55.8456	22.6841	-157.161	268.65	280.66	587.899	607.174	539.913	572.704	203.327		615.9	2.65659	2.57608	2.39566	2.6819	4.57314	5.89786	13.5716	1.56061	3.18957	10.1851	8.9739	7.48683	2.04381																615.9	2.58393	2.24066	2.31967	2.37307	3.74209
618	138.221	208.061	214.84	55.9564	23.1068	-157.161	273.308	281.679	587.396	604.195	538.683	574.972	202.771		618	3.39096	2.57533	2.30178	2.78896	4.97924	5.89168	18.2203	2.58313	2.69074	7.20514	7.74858	9.76445	1.48713																618	3.3183	2.23991	2.22579	2.48013	4.14819
620.1	136.56	207.613	214.84	56.2888	22.9659	-156.332	272.532	280.83	590.413	605.684	539.913	572.137	203.512		620.1	1.72623	2.12708	2.30501	3.11762	4.82175	6.71481	17.4338	1.73675	5.7122	8.69336	8.98287	6.93886	2.22776																620.1	1.65357	1.79166	2.22902	2.80879	3.9907
622.2	136.744	207.166	214.937	56.6212	22.825	-157.576	264.768	280.49	583.373	602.706	541.143	573.271	202.771		622.2	1.907	1.67892	2.40533	3.44628	4.66426	5.46464	9.65936	1.40007	-1.32443	5.71339	10.2173	8.08237	1.48578																622.2	1.83434	1.3435	2.32934	3.13745	3.83321
624.3	137.667	206.942	215.131	56.5104	22.2614	-153.015	270.203	281.17	589.408	604.692	544.218	571.003	202.771		624.3	2.82587	1.45447	2.60266	3.33174	4.08407	10.0199	15.0844	2.08279	4.71454	7.69811	13.2964	5.82378	1.48511																624.3	2.75321	1.11905	2.52667	3.02291	3.25302
626.4	137.298	207.837	214.743	56.178	22.6841	-159.649	270.979	281.51	589.408	605.684	538.683	571.57	203.512		626.4	2.45294	2.34862	2.21758	2.9956	4.49018	3.37889	15.8508	2.42571	4.7186	8.68984	7.76653	6.4003	2.22574																626.4	2.38028	2.0132	2.14159	2.68677	3.65913
628.5	138.221	208.732	215.131	56.5104	22.1205	-154.259	271.756	280.49	587.396	603.202	538.068	576.674	204.81		628.5	3.37181	3.24267	2.60911	3.32426	3.90999	8.76351	16.6173	1.40943	2.71107	6.20636	7.15601	11.5131	3.52256																628.5	3.29915	2.90725	2.53312	3.01543	3.07894
630.6	137.298	209.403	214.743	55.9564	22.4023	-155.503	271.756	281.679	587.899	604.195	541.143	575.54	202.956		630.6	2.44527	3.91312	2.22404	2.76652	4.1752	7.51334	16.6073	2.60185	3.21804	7.19808	10.2352	10.3886	1.66839																630.6	2.37261	3.5777	2.14805	2.45769	3.34415
632.7	137.113	207.837	214.646	55.9564	22.2614	-156.747	276.414	280.49	585.384	604.692	536.838	573.838	202.215		632.7	2.25684	2.34636	2.13016	2.76278	4.01771	6.26316	21.2558	1.41567	0.7076	7.69341	5.93518	8.69703	0.92631																632.7	2.18418	2.01094	2.05417	2.45395	3.18666
634.8	137.851	210.074	214.84	56.8429	22.9659	-157.991	274.085	280.66	582.367	600.223	538.068	572.137	203.883		634.8	2.99121	4.58281	2.32759	3.64554	4.70561	5.01289	18.9165	1.58869	-2.30583	3.22403	7.16947	7.00545	2.59374																634.8	2.91855	4.24739	2.2516	3.33671	3.87456
636.9	137.667	209.403	214.84	56.8429	23.9522	-156.747	273.308	280.66	589.91	604.692	535.609	573.838	204.81		636.9	2.80288	3.91086	2.33081	3.6418	5.67532	6.25082	18.1301	1.59181	5.24184	7.69106	4.71425	8.71606	3.51986																636.9	2.73022	3.57544	2.25482	3.33297	4.84427
639	138.59	208.732	215.326	56.2888	21.8388	-157.161	274.861	280.83	584.378	602.706	540.528	574.405	203.512		639	3.72175	3.23891	2.81944	3.08396	3.54533	5.82994	19.6728	1.76483	-0.28609	5.70398	9.63824	9.29257	2.22169																639	3.64909	2.90349	2.74345	2.77513	2.71428
641.1	135.821	208.508	215.229	56.9537	22.4023	-154.259	269.426	281.17	585.384	606.677	540.528	571.57	203.327		641.1	0.94972	3.01445	2.72556	3.74512	4.09224	8.72647	14.2277	2.10775	0.72387	9.67451	9.64273	6.46689	2.03572																641.1	0.877065	2.67903	2.64957	3.43629	3.26119
643.2	137.298	207.389	214.452	55.9564	22.5432	-156.332	270.203	280.66	588.402	601.713	544.218	573.838	203.883		643.2	2.42229	1.8951	1.95219	2.74409	4.21655	6.64689	14.9942	1.60117	3.74534	4.70873	13.3368	8.7446	2.59104																643.2	2.34963	1.55968	1.8762	2.43526	3.3855
645.3	138.036	207.166	215.229	56.6212	21.9796	-153.429	270.979	280.49	589.408	606.677	542.373	575.54	203.142		645.3	3.15656	1.67065	2.73201	3.40515	3.63636	9.54352	15.7606	1.43439	4.75521	9.67216	11.4965	10.4552	1.84907																645.3	3.0839	1.33523	2.65602	3.09632	2.80531
647.4	137.298	207.613	215.035	56.8429	22.2614	-155.917	274.085	282.189	589.91	604.692	539.913	574.405	202.586		647.4	2.41463	2.1173	2.54114	3.62311	3.90157	7.04924	18.8563	3.13641	5.26217	7.68518	9.04118	9.33062	1.29229																647.4	2.34197	1.78188	2.46515	3.31428	3.07052
649.5	136.744	208.956	214.549	56.178	22.1205	-159.235	270.979	281	587.396	602.706	541.143	573.838	203.883		649.5	1.8572	3.45894	2.05886	2.95447	3.74407	3.72567	15.7405	1.95033	2.75174	5.69811	10.2756	8.77314	2.58902																649.5	1.78454	3.12352	1.98287	2.64564	2.91302
651.6	136.929	207.837	214.937	56.5104	22.5432	-159.649	274.861	280.15	585.887	602.706	536.838	571.003	202.956		651.6	2.03787	2.33959	2.45049	3.28313	4.15018	3.30479	19.6127	1.10405	1.24711	5.69693	5.97555	5.94745	1.66165																651.6	1.96521	2.00417	2.3745	2.9743	3.31913
653.7	137.851	208.061	214.84	56.5104	21.8388	-157.576	273.308	282.869	590.413	607.67	540.528	572.137	203.327		653.7	2.95674	2.56254	2.35662	3.27939	3.42919	5.37202	18.0498	3.82537	5.77727	10.6604	9.66964	7.09106	2.03167																653.7	2.88408	2.22712	2.28063	2.97056	2.59814
655.8	137.113	207.613	214.549	57.1753	22.6841	-155.917	271.756	279.811	591.922	609.16	534.994	577.808	203.698		655.8	2.2147	2.11429	2.06854	3.94055	4.2579	7.02455	16.4869	0.77049	7.29004	12.1486	4.13973	12.7709	2.4017																655.8	2.14204	1.77887	1.99255	3.63172	3.42685
657.9	138.405	207.613	214.549	56.5104	23.2477	-155.503	265.544	280.83	586.893	604.195	536.838	573.838	203.327		657.9	3.50267	2.11353	2.07177	3.27191	4.80491	7.43307	10.2653	1.79291	2.26511	7.18281	5.98901	8.81119	2.03032																657.9	3.43001	1.77811	1.99578	2.96308	3.97386
660	137.851	206.942	214.84	56.8429	22.825	-156.332	274.085	279.301	586.39	600.72	536.838	580.643	203.698		660	2.94524	1.44168	2.36629	3.60067	4.36562	6.5975	18.7962	0.26703	1.76627	3.70643	5.9935	15.6251	2.40035																660	2.87258	1.10626	2.2903	3.29184	3.53457
662.1	137.298	208.732	214.549	56.3996	22.825	-155.917	273.308	279.471	590.413	603.699	542.373	572.137	203.142		662.1	2.38781	3.23063	2.07822	3.15363	4.34903	7.00602	18.0097	0.44005	5.79354	6.68396	11.5324	7.12911	1.84367																662.1	2.31515	2.89521	2.00223	2.8448	3.51798
664.2	137.113	208.508	214.549	56.5104	23.2477	-157.161	275.638	280.32	584.881	608.167	541.758	572.137	203.512		664.2	2.19938	3.00618	2.08144	3.26069	4.75514	5.75585	20.329	1.29257	0.26561	11.151	10.9219	7.13862	2.2136																664.2	2.12672	2.67076	2.00545	2.95186	3.92409
666.3	137.667	206.942	215.131	56.6212	22.825	-155.503	266.32	281	586.893	604.195	535.609	569.869	203.883		666.3	2.74925	1.43943	2.66717	3.36775	4.31584	7.40837	11.0017	1.97529	2.28138	7.17811	4.77705	4.87994	2.58363																666.3	2.67659	1.10401	2.59118	3.05892	3.48479
668.4	136.929	208.508	214.646	57.1753	22.9659	-155.088	267.873	281.17	588.905	606.677	536.838	575.54	203.142		668.4	2.00722	3.00467	2.18499	3.91811	4.44015	7.8169	12.5444	2.14831	4.29704	9.65923	6.01144	10.5599	1.84165																668.4	1.93456	2.66925	2.109	3.60928	3.6091
670.5	136.929	207.166	214.549	56.3996	22.9659	-156.332	274.085	280.66	588.402	604.692	538.683	575.54	204.439		670.5	2.00339	1.66162	2.09112	3.13867	4.42356	6.56663	18.746	1.64173	3.79821	7.67226	7.86072	10.5694	3.13838																670.5	1.93073	1.3262	2.01513	2.82984	3.59251
672.6	137.482	206.047	215.035	57.1753	22.825	-156.747	268.65	280.83	587.396	601.713	537.453	574.972	204.624		672.6	2.55316	0.54227	2.57984	3.91063	4.26607	6.14585	13.3009	1.81475	2.79648	4.69228	6.63531	10.0118	3.323																672.6	2.4805	0.206852	2.50385	3.6018	3.43502
674.7	137.482	206.047	214.84	57.2861	22.2614	-153.844	274.861	282.189	586.39	604.692	543.603	573.838	203.327		674.7	2.54933	0.54152	2.38887	4.01769	3.68588	9.04238	19.5024	3.17697	1.79474	7.66991	12.7892	8.88729	2.02493																674.7	2.47667	0.206102	2.31288	3.70886	2.85483
676.8	138.036	208.284	214.84	57.1753	23.3886	-153.429	274.085	280.66	590.916	604.692	537.453	574.405	202.956		676.8	3.0991	2.77796	2.3921	3.90315	4.79649	9.4509	18.7159	1.65109	6.32491	7.66873	6.64428	9.4638	1.65356																676.8	3.02644	2.44254	2.31611	3.59432	3.96544
678.9	137.667	207.837	214.452	56.8429	23.6704	-157.161	266.32	281.849	587.396	606.677	536.838	570.436	204.81		678.9	2.72627	2.32981	2.00702	3.56701	5.0617	5.71263	10.9415	2.84351	2.80868	9.65336	6.03387	5.50411	3.50638																678.9	2.65361	1.99439	1.93103	3.25818	4.23065
681	138.59	206.718	215.229	56.8429	22.9659	-155.088	273.308	281.34	590.413	604.692	542.373	575.54	202.03		681	3.64513	1.21036	2.78685	3.56327	4.3406	7.77985	17.9195	2.33693	5.83014	7.66638	11.5727	10.6169	0.72551																681	3.57247	0.874942	2.71086	3.25444	3.50955
683.1	138.036	208.508	214.646	57.0645	22.4023	-158.405	263.991	279.301	587.899	605.684	538.068	571.003	203.512		683.1	3.0876	2.99941	2.20757	3.78113	3.76041	4.45628	8.59204	0.30135	3.31971	8.65811	7.27264	6.09014	2.20753																683.1	3.01494	2.66399	2.13158	3.4723	2.92936
685.2	137.113	207.837	214.161	56.2888	23.5295	-157.576	267.097	280.32	584.378	604.692	538.683	578.942	204.068		685.2	2.16107	2.32755	1.7254	3.00169	4.87102	5.27941	11.6878	1.32377	-0.19662	7.66403	7.89212	14.0381	2.76296																685.2	2.08841	1.99213	1.64941	2.69286	4.03997
687.3	137.851	208.284	214.258	56.8429	23.1068	-155.917	280.296	282.869	585.887	606.677	536.223	571.57	203.327		687.3	2.89544	2.7742	1.82572	3.55205	4.43173	6.93193	24.8774	3.87529	1.31625	9.64865	5.43681	6.67616	2.02089																687.3	2.82278	2.43878	1.74973	3.24322	3.60068
689.4	137.113	209.179	214.355	57.0645	23.5295	-155.088	274.861	281.51	586.893	607.174	540.528	572.137	202.956		689.4	2.15341	3.66835	1.92605	3.76991	4.83784	7.75516	19.4322	2.51931	2.32611	10.144	9.74589	7.25278	1.64951																689.4	2.08075	3.33293	1.85006	3.46108	4.00679
691.5	137.482	207.166	214.646	56.732	22.825	-155.917	265.544	279.301	586.39	603.699	541.758	575.54	205.18		691.5	2.51868	1.6541	2.22047	3.43367	4.11675	6.91958	10.1048	0.31383	1.82728	6.6675	10.9802	10.6645	3.87304																691.5	2.44602	1.31868	2.14448	3.12484	3.2857
693.6	137.851	207.389	214.84	57.1753	23.5295	-155.088	270.203	281.34	588.402	604.692	539.298	571.003	203.327		693.6	2.88395	1.87704	2.4179	3.87323	4.80466	7.74281	14.7535	2.35565	3.84295	7.65933	8.52497	6.1377	2.01886																693.6	2.81129	1.54162	2.34191	3.5644	3.97361
695.7	137.851	207.613	214.84	56.9537	23.5295	-155.503	272.532	281.849	585.384	605.188	542.988	573.838	202.771		695.7	2.88012	2.09999	2.42112	3.64789	4.78807	7.32193	17.0728	2.86847	0.82961	8.15455	12.219	8.98241	1.46219																695.7	2.80746	1.76457	2.34513	3.33906	3.95702
697.8	136.744	208.508	214.258	57.0645	22.9659	-157.991	272.532	280.83	585.887	602.706	538.683	576.107	202.215		697.8	1.76909	2.99414	1.84185	3.75495	4.20787	4.82766	17.0628	1.85219	1.33658	5.67108	7.91904	11.26	0.90541																697.8	1.69643	2.65872	1.76586	3.44612	3.37682
699.9	137.482	207.613	214.064	56.0672	22.6841	-155.088	270.203	281	585.384	600.72	536.223	570.436	202.956		699.9	2.50336	2.09849	1.65088	2.75391	3.90948	7.72429	14.7234	2.02521	0.83775	3.6841	5.46372	5.59924	1.64614																699.9	2.4307	1.76307	1.57489	2.44508	3.07843
702	137.667	206.718	214.549	56.8429	22.5432	-151.771	274.861	280.15	589.408	603.202	541.143	573.838	203.698		702	2.68413	1.20283	2.1395	3.52587	3.75199	11.0354	19.372	1.17893	4.86501	6.16523	10.3877	9.01095	2.38687																702	2.61147	0.867412	2.06351	3.21704	2.92094
704.1	137.113	206.942	214.549	56.6212	22.9659	-156.332	272.532	281.34	590.413	604.195	536.838	575.54	204.439		704.1	2.1266	1.42588	2.14273	3.30043	4.1581	6.46784	17.0327	2.37125	5.87488	7.15695	6.08769	10.7216	3.12759																704.1	2.05394	1.09046	2.06674	2.9916	3.32705
706.2	137.667	206.942	214.355	56.0672	23.5295	-155.088	266.32	281	589.91	607.174	540.528	571.57	204.254		706.2	2.67646	1.42513	1.95185	2.74269	4.70511	7.70576	10.8111	2.03457	5.37605	10.1346	9.78178	6.76178	2.94152																706.2	2.6038	1.08971	1.87586	2.43386	3.87406
708.3	138.959	206.495	214.452	55.9564	23.6704	-157.991	270.203	279.471	588.905	606.181	536.838	579.509	204.81		708.3	3.96433	0.97688	2.05218	2.62815	4.82942	4.79679	14.6833	0.50869	4.37431	9.1405	6.09667	14.7098	3.49694																708.3	3.89167	0.641462	1.97619	2.31932	3.99837
710.4	137.851	206.718	214.258	56.5104	22.9659	-158.82	274.085	280.83	584.881	601.713	539.298	572.704	202.586		710.4	2.8533	1.19983	1.8612	3.17841	4.10833	3.96131	18.5555	1.87092	0.35508	4.67113	8.56085	7.9149	1.27207																710.4	2.78064	0.864412	1.78521	2.86958	3.27728
712.5	137.851	207.837	214.064	56.732	22.825	-154.673	266.32	280.83	587.396	606.181	541.758	572.137	203.883		712.5	2.84947	2.31777	1.67023	3.39627	3.95083	8.10184	10.7811	1.87404	2.87375	9.13815	11.025	7.35741	2.5688																712.5	2.77681	1.98235	1.59424	3.08744	3.11978
714.6	137.851	206.271	214.549	56.8429	23.1068	-154.259	266.32	281.51	581.864	601.713	537.453	572.704	203.883		714.6	2.84564	0.75092	2.15885	3.50343	4.21604	8.51036	10.771	2.55676	-2.65418	4.66878	6.72502	7.93393	2.56812																714.6	2.77298	0.415502	2.08286	3.1946	3.38499
716.7	137.667	207.166	214.646	57.0645	23.6704	-153.015	275.638	281	586.39	603.202	533.764	573.838	203.142		716.7	2.65731	1.64507	2.25918	3.72129	4.76305	9.74819	20.0783	2.05018	1.87608	6.157	3.03991	9.07754	1.82615																716.7	2.58465	1.30965	2.18319	3.41246	3.932
718.8	137.482	208.061	214.452	56.2888	23.9522	-153.429	268.65	281	584.881	599.727	534.994	576.107	203.512		718.8	2.46888	2.53922	2.0683	2.94185	5.02826	9.32742	13.0803	2.0533	0.37135	2.68053	4.27429	11.3552	2.19607																718.8	2.39622	2.2038	1.99231	2.63302	4.19721
720.9	137.851	208.061	214.549	56.6212	23.6704	-157.161	270.203	279.471	586.893	608.167	541.143	574.405	202.956		720.9	2.83415	2.53846	2.16853	3.27051	4.72987	5.58914	14.6231	0.52742	2.38712	11.1192	10.4281	9.66356	1.6394																720.9	2.76149	2.20304	2.09254	2.96168	3.89882
723	138.405	207.837	214.549	57.0645	23.1068	-151.771	272.532	281.17	584.881	604.692	539.913	575.54	201.844		723	3.38392	2.31401	2.17176	3.71007	4.14968	10.9737	16.9424	2.22944	0.37948	7.64288	9.20266	10.8072	0.52662																723	3.31126	1.97859	2.09577	3.40124	3.31863
725.1	137.851	207.837	214.549	56.5104	23.6704	-155.088	274.085	281.17	584.881	606.677	538.683	573.271	204.254		725.1	2.82649	2.31326	2.17498	3.15223	4.69669	7.65019	18.4853	2.23256	0.38355	9.6275	7.97735	8.54849	2.93545																725.1	2.75383	1.97784	2.09899	2.8434	3.86564
727.2	137.482	208.284	214.549	56.2888	23.9522	-156.332	273.308	280.66	589.408	606.677	535.609	573.271	204.254		727.2	2.45356	2.75991	2.17821	2.92689	4.9619	6.39992	17.6989	1.72598	4.91382	9.62633	4.90714	8.558	2.93478																727.2	2.3809	2.42449	2.10222	2.61806	4.13085
729.3	138.221	207.389	213.869	56.5104	23.6704	-153.429	266.32	281.34	587.396	604.692	542.373	572.137	203.883		729.3	3.18792	1.86425	1.50193	3.14475	4.6635	9.29654	10.7008	2.4087	2.90628	7.63935	11.6759	7.43352	2.5634																729.3	3.11526	1.52883	1.42594	2.83592	3.83245
731.4	138.959	207.613	214.161	56.6212	23.8113	-156.747	274.085	281.17	586.39	601.216	534.994	572.704	202.771		731.4	3.92219	2.0872	1.79636	3.25181	4.78781	5.97297	18.4552	2.24192	1.90455	4.16288	4.30121	8.01003	1.45073																731.4	3.84953	1.75178	1.72037	2.94298	3.95676
733.5	138.221	207.613	214.84	56.8429	23.8113	-155.088	275.638	283.038	589.408	601.713	534.379	574.405	204.439		733.5	3.18026	2.08645	2.47918	3.46977	4.77122	7.6255	19.9981	4.11384	4.92602	4.6582	3.69069	9.72064	3.11815																733.5	3.1076	1.75103	2.40319	3.16094	3.94017
735.6	137.298	207.389	214.937	56.732	23.8113	-158.405	270.979	281.51	584.881	602.706	536.223	574.405	203.883		735.6	2.25373	1.862	2.57951	3.35513	4.75463	4.30192	15.3293	2.58796	0.40388	5.64993	5.53998	9.73015	2.56138																735.6	2.18107	1.52658	2.50352	3.0463	3.92358
737.7	136.929	206.718	214.064	56.8429	23.1068	-155.088	274.085	283.208	586.39	604.692	537.453	571.003	204.068		737.7	1.8808	1.19004	1.70893	3.4623	4.03354	7.61315	18.4251	4.28998	1.91675	7.63465	6.77436	6.33747	2.74611																737.7	1.80814	0.854622	1.63294	3.15347	3.20249
739.8	136.929	207.166	214.452	56.8429	23.2477	-155.917	269.426	281.679	589.408	605.684	534.994	567.601	204.81		739.8	1.87697	1.63679	2.10056	3.45856	4.15785	6.77757	13.7564	2.7641	4.93822	8.62637	4.31915	2.94478	3.48683																739.8	1.80431	1.30137	2.02457	3.14973	3.3268
741.9	138.405	207.613	214.743	56.5104	24.6567	-155.503	272.532	281.849	585.384	603.699	539.913	571.003	203.698		741.9	3.34944	2.08344	2.39499	3.12232	5.55026	7.1861	16.8522	2.93712	0.91909	6.6393	9.24304	6.35649	2.37406																741.9	3.27678	1.74802	2.319	2.81349	4.71921
744	137.667	208.284	214.355	57.2861	24.0931	-154.259	276.414	279.981	588.905	606.181	539.913	575.54	204.068		744	2.60751	2.75389	2.00991	3.89428	4.97006	8.42392	20.7243	1.07144	4.44345	9.12052	9.24752	10.9023	2.74408																744	2.53485	2.41847	1.93392	3.58545	4.13901
746.1	137.298	208.061	214.355	56.8429	23.6704	-156.747	271.756	282.699	588.905	601.216	533.764	574.972	201.659		746.1	2.23458	2.52944	2.01314	3.44734	4.53077	5.92975	16.0557	3.79276	4.44752	4.15465	3.10271	10.3447	0.33391																746.1	2.16192	2.19402	1.93715	3.13851	3.69972
748.2	137.482	207.166	214.355	57.0645	23.5295	-153.015	268.65	280.49	588.402	609.656	543.603	572.704	203.142		748.2	2.41525	1.63378	2.01636	3.6652	4.37328	9.65558	12.9399	1.58728	3.94869	12.5934	12.9462	8.08613	1.81603																748.2	2.34259	1.29836	1.94037	3.35637	3.54223
750.3	138.036	207.166	214.355	57.0645	23.3886	-155.917	269.426	280.15	583.373	603.699	541.143	572.704	204.81		750.3	2.96502	1.63303	2.01959	3.66146	4.21579	6.7467	13.7062	1.2507	-1.07635	6.6346	10.4909	8.09564	3.48346																750.3	2.89236	1.29761	1.9436	3.35263	3.38474
752.4	137.113	207.389	213.869	56.8429	23.9522	-151.356	267.873	281	588.402	601.713	539.913	573.838	203.698		752.4	2.03849	1.85598	1.53741	3.43612	4.7628	11.3019	12.1433	2.10322	3.95682	4.64762	9.26546	9.23925	2.37069																752.4	1.96583	1.52056	1.46142	3.12729	3.93175
754.5	137.298	207.389	214.161	56.8429	24.0931	-153.844	275.638	280.49	587.396	604.195	532.534	567.601	204.439		754.5	2.21925	1.85523	1.83184	3.43238	4.88711	8.80775	19.8978	1.59664	2.95509	7.12875	1.89075	3.01137	3.11141																754.5	2.14659	1.51981	1.75585	3.12355	4.05606
756.6	137.667	207.389	214.549	57.0645	23.8113	-157.576	270.979	280.66	586.39	606.677	534.379	570.436	204.068		756.6	2.58452	1.85447	2.22336	3.65024	4.58872	5.06948	15.2291	1.76966	1.95335	9.60987	3.74003	5.85608	2.74004																756.6	2.51186	1.51905	2.14737	3.34141	3.75767
758.7	138.036	206.047	214.646	56.732	23.6704	-155.917	265.544	281.34	584.378	600.72	542.988	573.838	203.142		758.7	2.94969	0.51142	2.32369	3.314	4.43123	6.722	9.78393	2.45238	-0.05428	3.6512	12.3536	9.26779	1.81266																758.7	2.87703	0.176002	2.2477	3.00517	3.60018
760.8	137.113	208.284	214.452	56.8429	24.3749	-154.673	277.191	281.679	585.384	602.706	538.068	576.107	202.4		760.8	2.02316	2.74787	2.13281	3.42116	5.11913	7.95983	21.4206	2.7953	0.95569	5.63582	7.43861	11.5454	1.07059																760.8	1.9505	2.41245	2.05682	3.11233	4.28808
762.9	138.405	207.389	214.355	56.3996	24.7976	-157.576	272.532	281.17	583.373	602.706	537.453	573.271	204.439		762.9	3.31113	1.85222	2.03894	2.97412	5.52524	5.05095	16.7519	2.28872	-1.05194	5.63465	6.82819	8.71972	3.10872																762.9	3.23847	1.5168	1.96295	2.66529	4.69419
765	139.512	208.061	214.452	57.5077	23.6704	-154.673	273.308	280.66	584.881	606.181	539.913	572.137	204.624		765	4.4146	2.52266	2.13927	4.07848	4.38145	7.94748	17.5184	1.78214	0.46082	9.10877	9.29238	7.59523	3.29334																765	4.34194	2.18724	2.06328	3.76965	3.5504
767.1	137.113	206.942	214.161	57.5077	24.3749	-157.161	270.979	281	585.887	606.181	540.528	576.107	204.068		767.1	2.01167	1.40331	1.85119	4.07474	5.06936	5.45331	15.1789	2.12506	1.47079	9.1076	9.91186	11.5739	2.73667																767.1	1.93901	1.06789	1.7752	3.76591	4.23831
769.2	137.482	208.284	213.967	56.8429	23.2477	-156.747	275.638	279.131	586.39	602.706	539.913	572.137	203.142		769.2	2.37694	2.74486	1.66032	3.4062	3.92557	5.86183	19.8276	0.25938	1.97776	5.63112	9.30135	7.61425	1.80929																769.2	2.30428	2.40944	1.58433	3.09737	3.09452
771.3	137.667	208.284	213.967	57.6185	24.7976	-153.844	267.097	281	582.367	605.684	538.683	573.838	203.512		771.3	2.55771	2.74411	1.66354	4.17806	5.45888	8.75836	11.2767	2.1313	-2.04148	8.60875	8.07603	9.32487	2.17922																771.3	2.48505	2.40869	1.58755	3.86923	4.62783
773.4	137.667	208.732	214.743	57.7293	23.5295	-154.673	273.308	281.17	588.905	602.706	536.838	577.241	203.698		773.4	2.55388	3.19075	2.44337	4.28512	4.17419	7.92278	17.4782	2.30432	4.50039	5.62877	6.23572	12.7366	2.36395																773.4	2.48122	2.85533	2.36738	3.97629	3.34314
775.5	138.036	208.508	214.549	57.6185	24.7976	-155.503	268.65	281.679	591.922	610.153	541.143	577.808	204.439		775.5	2.91905	2.9663	2.25239	4.17058	5.42569	7.08731	12.8095	2.81714	7.52186	13.0746	10.5447	13.3131	3.10467																775.5	2.84639	2.63088	2.1764	3.86175	4.59464
777.6	137.667	208.061	215.035	56.9537	24.7976	-157.991	270.979	281	589.408	605.188	536.223	572.137	203.883		777.6	2.54622	2.51815	2.74112	3.50204	5.4091	4.59303	15.1288	2.14066	5.01142	8.10872	5.62969	7.65231	2.5479																777.6	2.47356	2.18273	2.66513	3.19321	4.57805
779.7	138.774	208.061	215.229	57.1753	24.6567	-160.064	277.967	282.189	582.87	605.684	538.683	574.972	204.439		779.7	3.64958	2.5174	2.93844	3.7199	5.25161	2.51356	22.1068	3.33298	-1.52231	8.60405	8.09398	10.4969	3.10332																779.7	3.57692	2.18198	2.86245	3.41107	4.42056
781.8	139.328	208.508	215.326	57.5077	25.0793	-157.991	259.332	281	585.887	602.209	534.379	568.735	201.474		781.8	4.19935	2.96405	3.03877	4.04856	5.65762	4.58069	3.46202	2.1469	1.49926	5.12767	3.79386	4.26913	0.13705																781.8	4.12669	2.62863	2.96278	3.73973	4.82657
783.9	138.59	209.627	214.549	57.9509	25.3611	-161.308	264.768	279.811	586.893	602.706	534.994	572.137	202.03		783.9	3.45742	4.08189	2.26529	4.48802	5.92283	1.25721	8.88719	0.96082	2.50912	5.6229	4.41335	7.68084	0.69247																783.9	3.38476	3.74647	2.1893	4.17919	5.09178
786	139.143	208.284	213.384	57.7293	24.6567	-165.04	263.215	280.49	584.378	600.223	536.838	573.838	202.956		786	4.00719	2.73884	1.10362	4.26268	5.20184	-2.48106	7.32427	1.64344	-0.00141	3.13942	6.26263	9.39146	1.6185																786	3.93453	2.40342	1.02763	3.95385	4.37079
788.1	138.221	209.403	214.452	57.1753	23.8113	-164.211	264.768	281	590.413	602.706	536.223	566.467	202.4		788.1	3.08066	3.85669	2.17475	3.70494	4.33985	-1.65794	8.86714	2.15626	6.03756	5.62055	5.65212	2.02947	1.06183																788.1	3.008	3.52127	2.09876	3.39611	3.5088
790.2	138.959	207.837	214.161	56.9537	24.3749	-158.82	265.544	279.131	586.39	603.202	533.764	567.601	201.288		790.2	3.81493	2.28994	1.88667	3.4796	4.88686	3.72669	9.63351	0.29058	2.01843	6.11587	3.1969	3.17308	-0.05095																790.2	3.74227	1.95452	1.81068	3.17077	4.05581
792.3	138.036	208.508	214.743	56.9537	24.5158	-162.137	256.227	280.49	586.893	597.741	535.609	568.735	202.956		792.3	2.8884	2.96028	2.4724	3.47586	5.01116	0.40311	0.30618	1.6528	2.52539	0.65359	5.04619	4.31669	1.61648																792.3	2.81574	2.62486	2.39641	3.16703	4.18011
794.4	138.774	206.271	214.743	57.2861	23.9522	-164.211	259.332	280.66	583.875	602.209	534.379	569.302	202.956		794.4	3.62277	0.72233	2.47562	3.80452	4.43097	-1.67646	3.40185	1.82582	-0.48804	5.12062	3.82078	4.89321	1.6158																794.4	3.55011	0.386912	2.39963	3.49569	3.59992
796.5	137.667	209.403	214.355	57.3969	24.7976	-162.552	260.885	280.83	584.881	598.734	533.764	569.869	202.586		796.5	2.51174	3.85368	2.09055	3.91158	5.25978	-0.02393	4.94473	1.99884	0.52183	1.64414	3.21036	5.46972	1.24443																796.5	2.43908	3.51826	2.01456	3.60275	4.42873
798.6	138.221	208.284	214.258	57.0645	24.7976	-163.381	260.885	280.32	586.893	600.72	533.149	573.838	201.288		798.6	3.06151	2.73433	1.99667	3.57544	5.24319	-0.85941	4.9347	1.49226	2.53759	3.62887	2.59995	9.44853	-0.05364																798.6	2.98885	2.39891	1.92068	3.26661	4.41214
800.7	138.036	207.389	214.258	56.8429	25.3611	-165.869	258.556	280.15	589.408	601.216	530.689	572.137	202.956		800.7	2.87308	1.83867	1.9999	3.3501	5.7901	-3.35368	2.59537	1.32558	5.05616	4.12409	0.14463	7.75694	1.61378																800.7	2.80042	1.50325	1.92391	3.04127	4.95905
802.8	138.221	207.837	214.258	56.5104	23.9522	-165.04	260.109	280.15	583.875	601.713	536.838	567.601	202.03		802.8	3.05384	2.28542	2.00312	3.01386	4.36461	-2.53046	4.13824	1.3287	-0.47177	4.61942	6.29852	3.23016	0.68641																802.8	2.98118	1.95	1.92713	2.70503	3.53356
804.9	137.298	209.403	214.161	56.6212	24.7976	-158.405	266.32	279.471	585.384	603.699	535.609	567.034	200.917		804.9	2.12731	3.85067	1.90925	3.12092	5.19342	4.09817	10.3398	0.65222	1.04109	6.60404	5.0731	2.67267	-0.42637																804.9	2.05465	3.51525	1.83326	2.81209	4.36237
807	137.482	208.732	214.258	56.9537	25.0793	-164.211	265.544	280.49	585.384	602.706	531.304	574.972	200.917		807	2.30798	3.17872	2.00957	3.44968	5.45852	-1.71351	9.55328	1.67464	1.04516	5.60997	0.77299	10.6206	-0.42704																807	2.23532	2.8433	1.93358	3.14085	4.62747
809.1	137.482	207.389	213.967	56.9537	24.234	-163.381	252.344	279.471	583.373	599.727	534.379	564.199	202.771		809.1	2.30415	1.83566	1.7216	3.44594	4.59663	-0.89028	-3.65634	0.65846	-0.96247	2.62999	3.85217	-0.14351	1.42578																809.1	2.23149	1.50024	1.64561	3.13711	3.76558
811.2	137.667	208.956	214.452	57.1753	25.3611	-163.381	260.885	278.961	586.893	604.195	533.149	568.168	202.4		811.2	2.48492	3.40101	2.21023	3.6638	5.70714	-0.89645	4.87453	0.15188	2.56199	7.09702	2.62686	3.83521	1.05441																811.2	2.41226	3.06559	2.13424	3.35497	4.87609
813.3	138.221	208.061	214.064	56.8429	24.3749	-161.723	261.662	279.811	587.396	600.223	536.223	573.838	202.4		813.3	3.03469	2.50536	1.82505	3.32766	4.70435	0.75607	5.641	1.00451	3.06896	3.12414	5.70595	9.51512	1.05374																813.3	2.96203	2.16994	1.74906	3.01883	3.8733
815.4	137.298	208.508	214.355	56.732	24.0931	-162.967	257.78	280.32	586.39	597.741	535.609	565.333	202.215		815.4	2.10816	2.95201	2.11958	3.21302	4.40596	-0.4941	1.74877	1.51723	2.06723	0.64067	5.09553	1.01913	0.86766																815.4	2.0355	2.61659	2.04359	2.90419	3.57491
817.5	138.221	209.179	214.258	56.8429	23.5295	-162.137	260.885	281	582.87	601.216	532.534	569.302	202.956		817.5	3.02703	3.62245	2.0257	3.32018	3.82577	0.32902	4.84444	2.19995	-1.4491	4.11469	2.02532	4.99785	1.60839																817.5	2.95437	3.28703	1.94971	3.01135	2.99472
819.6	138.036	209.179	213.869	57.0645	24.234	-163.381	265.544	279.981	586.39	598.734	536.223	565.333	202.03		819.6	2.8386	3.6217	1.64063	3.53804	4.51368	-0.92115	9.49312	1.18377	2.07536	1.63122	5.7194	1.03816	0.68101																819.6	2.76594	3.28628	1.56464	3.22921	3.68263
821.7	138.59	208.284	214.937	57.5077	24.0931	-164.625	263.215	279.981	584.378	598.734	531.304	569.869	202.586		821.7	3.38847	2.72605	2.71175	3.9775	4.35619	-2.17133	7.15379	1.18689	0.06773	1.63004	0.80439	5.58387	1.23634																821.7	3.31581	2.39063	2.63576	3.66867	3.52514
823.8	137.851	207.166	214.258	56.9537	24.5158	-161.723	263.215	280.32	587.899	601.216	541.758	569.302	202.586		823.8	2.64644	1.6067	2.03538	3.41976	4.76229	0.7252	7.14376	1.52971	3.5922	4.11117	11.2628	5.02638	1.23567																823.8	2.57378	1.27128	1.95939	3.11093	3.93124
825.9	137.113	208.061	213.967	56.5104	24.6567	-161.308	263.215	279.981	587.396	600.72	536.838	564.766	202.771		825.9	1.90441	2.50085	1.7474	2.97272	4.8866	1.13372	7.13373	1.19313	3.09336	3.61359	6.34786	0.4996	1.42039																825.9	1.83175	2.16543	1.67141	2.66389	4.05555
828	137.298	208.956	214.064	56.732	24.234	-163.381	260.109	280.49	585.887	599.727	530.074	569.302	202.4		828	2.08517	3.39499	1.84763	3.19058	4.44731	-0.94585	4.0179	1.70585	1.58873	2.61942	-0.41195	5.04541	1.04902																828	2.01251	3.05957	1.77164	2.88175	3.61626
830.1	138.59	207.837	213.675	56.8429	24.5158	-160.893	266.32	279.641	585.887	601.713	530.689	567.601	202.956		830.1	3.37314	2.27564	1.46255	3.29774	4.71252	1.53598	10.2195	0.85957	1.5928	4.60414	0.20743	3.35382	1.60434																830.1	3.30048	1.94022	1.38656	2.98891	3.88147
832.2	138.405	208.284	214.646	56.732	24.3749	-165.455	258.556	281.17	584.378	598.734	534.994	565.9	201.103		832.2	3.18471	2.72229	2.43658	3.1831	4.55503	-3.0316	2.44495	2.39169	0.08806	1.62417	4.51652	1.66223	-0.24983																832.2	3.11205	2.38687	2.36059	2.87427	3.72398
834.3	137.482	208.061	214.258	56.5104	24.234	-160.064	261.662	279.981	588.905	601.216	531.919	568.168	202.586		834.3	2.25818	2.49784	2.05151	2.95777	4.39754	2.35303	5.54072	1.20561	4.61833	4.10529	1.4463	3.93985	1.23229																834.3	2.18552	2.16242	1.97552	2.64894	3.56649
836.4	137.482	207.166	213.967	56.5104	24.0931	-161.723	261.662	280.66	591.419	599.231	537.453	567.601	202.03		836.4	2.25435	1.60218	1.76353	2.95403	4.24005	0.68815	5.53069	1.88823	7.1369	2.11832	6.98519	3.38236	0.67562																836.4	2.18169	1.26676	1.68754	2.6452	3.409
838.5	137.667	208.284	213.578	56.732	24.0931	-165.869	260.885	278.961	588.402	596.748	534.994	567.034	202.03		838.5	2.43512	2.72003	1.37836	3.17189	4.22345	-3.46482	4.74416	0.19245	4.12357	-0.36516	4.52997	2.82487	0.67495																838.5	2.36246	2.38461	1.30237	2.86306	3.3924
840.6	137.298	207.389	213.869	56.9537	24.234	-158.82	260.109	280.32	587.396	599.231	535.609	571.003	202.03		840.6	2.06219	1.82438	1.67288	3.38985	4.34776	3.5785	3.95773	1.55467	3.12183	2.11597	5.14936	6.80358	0.67427																840.6	1.98953	1.48896	1.59689	3.08102	3.51671
842.7	138.036	207.389	213.967	56.3996	23.9522	-161.308	257.78	280.83	582.87	598.734	530.689	569.869	201.474		842.7	2.79646	1.82363	1.77321	2.83201	4.04937	1.08433	1.61841	2.06749	-1.4003	1.61829	0.23434	5.679	0.1175																842.7	2.7238	1.48821	1.69722	2.52318	3.21832
844.8	137.851	208.061	214.064	56.9537	23.9522	-161.723	260.885	280.15	581.864	602.209	542.373	568.735	202.03		844.8	2.60813	2.49407	1.87343	3.38237	4.03278	0.66346	4.71408	1.39111	-2.40203	5.09242	11.9226	4.55451	0.67292																844.8	2.53547	2.15865	1.79744	3.07354	3.20173
846.9	137.667	208.956	213.481	56.2888	23.9522	-165.455	258.556	279.301	585.384	599.231	539.298	567.601	202.215		846.9	2.4198	3.38822	1.29426	2.71373	4.01619	-3.07482	2.37475	0.54473	1.12243	2.11244	8.85242	3.42992	0.85755																846.9	2.34714	3.0528	1.21827	2.4049	3.18514
849	137.851	207.837	214.064	56.2888	24.234	-164.625	270.203	278.791	582.367	596.748	539.298	570.436	201.474		849	2.60047	2.26887	1.87988	2.70999	4.2814	-2.25159	14.0114	0.03815	-1.891	-0.37104	8.8569	6.27463	0.11548																849	2.52781	1.93345	1.80389	2.40116	3.45035
851.1	137.482	207.837	213.675	56.6212	23.3886	-160.479	263.991	281.34	587.899	599.231	535.609	571.003	202.4		851.1	2.22754	2.26812	1.49481	3.03865	3.41941	1.88893	7.78979	2.58967	3.64507	2.11009	5.17179	6.85115	1.0416																851.1	2.15488	1.9327	1.41882	2.72982	2.58836
853.2	137.851	207.613	213.578	57.0645	23.5295	-163.796	262.438	279.641	584.378	601.216	532.534	568.168	202.4		853.2	2.5928	2.04356	1.40093	3.47821	3.54372	-1.43464	6.22687	0.89389	0.12873	4.09471	2.10157	4.02546	1.04093																853.2	2.52014	1.70814	1.32494	3.16938	2.71267
855.3	138.221	207.837	213.675	56.8429	24.0931	-164.211	262.438	280.49	583.875	601.216	534.994	564.199	202.215		855.3	2.95807	2.26661	1.50126	3.25287	4.09072	-1.85552	6.21684	1.74641	-0.3701	4.09354	4.56586	0.06577	0.85485																855.3	2.88541	1.93119	1.42527	2.94404	3.25967
857.4	137.667	206.942	213.772	55.7348	24.0931	-163.796	256.227	279.471	587.899	601.713	533.149	566.467	200.732		857.4	2.40064	1.37096	1.60159	2.14103	4.07413	-1.44699	-0.00469	0.73023	3.65727	4.58886	2.72554	2.34338	-0.62862																857.4	2.32798	1.03554	1.5256	1.8322	3.24308
859.5	137.298	206.942	213.578	56.0672	23.9522	-163.796	266.32	279.641	588.402	598.734	529.459	569.869	203.142		859.5	2.02771	1.37021	1.41061	2.46969	3.91664	-1.45316	10.0791	0.90325	4.16423	1.60889	-0.95967	5.7551	1.78031																859.5	1.95505	1.03479	1.33462	2.16086	3.08559
861.6	137.298	206.495	213.675	55.9564	24.0931	-162.137	255.45	280.32	588.402	599.231	541.143	568.168	201.844		861.6	2.02388	0.92196	1.51094	2.35515	4.04095	0.19936	-0.80125	1.58587	4.1683	2.10421	10.7286	4.06351	0.48213																861.6	1.95122	0.586542	1.43495	2.04632	3.2099
863.7	137.298	207.613	213.578	56.5104	23.5295	-162.137	272.532	280.66	583.875	602.706	537.453	567.034	201.844		863.7	2.02005	2.0398	1.41706	2.90541	3.46076	0.19319	16.2705	1.92879	-0.35383	5.57824	7.0435	2.93902	0.48146																863.7	1.94739	1.70438	1.34107	2.59658	2.62971
865.8	137.298	206.271	213.967	56.3996	24.5158	-165.455	260.885	280.49	584.378	598.238	534.994	568.168	201.659		865.8	2.01622	0.69675	1.80869	2.79087	4.43047	-3.13039	4.6138	1.76201	0.15314	1.10896	4.58829	4.08254	0.29548																865.8	1.94356	0.361332	1.7327	2.48204	3.59942
867.9	137.482	207.837	213.481	56.178	24.9384	-162.552	258.556	279.641	584.378	597.741	533.764	567.034	202.956		867.9	2.19689	2.2621	1.32651	2.56553	4.83648	-0.23386	2.27447	0.91573	0.1572	0.61129	3.36287	2.95805	1.59221																867.9	2.12423	1.92668	1.25052	2.2567	4.00543
870	137.298	206.942	213.869	56.732	23.8113	-162.967	259.332	280.83	589.91	596.748	532.534	569.302	202.586		870	2.00856	1.36645	1.71804	3.11579	3.69278	-0.65464	3.04084	2.10805	5.69327	-0.38279	2.13746	5.23566	1.22083																870	1.9359	1.03103	1.64205	2.80696	2.86173
872.1	138.405	207.613	213.675	56.3996	23.8113	-164.625	260.885	279.811	589.91	602.209	529.459	566.467	202.771		872.1	3.11193	2.03679	1.52706	2.77965	3.67619	-2.31951	4.58371	1.09187	5.69734	5.07714	-0.93276	2.40997	1.40556																872.1	3.03927	1.70137	1.45107	2.47082	2.84514
874.2	137.298	207.389	213.481	56.2888	24.5158	-163.381	253.897	279.641	581.361	596.252	537.453	567.034	203.883		874.2	2.0009	1.81234	1.33619	2.66511	4.3641	-1.08168	-2.41432	0.92509	-2.848	-0.88164	7.06593	2.98659	2.51689																874.2	1.92824	1.47692	1.2602	2.35628	3.53305
876.3	137.667	207.166	213.869	56.2888	24.234	-165.04	253.897	280.15	583.373	597.741	536.223	560.797	202.586		876.3	2.36616	1.58789	1.72771	2.66137	4.06571	-2.74656	-2.42434	1.43791	-0.83233	0.60659	5.84051	-3.2413	1.21881																876.3	2.2935	1.25247	1.65172	2.35254	3.23466
878.4	137.851	208.061	213.19	56.178	23.6704	-161.308	262.438	279.981	586.39	601.713	530.074	567.034	201.659		878.4	2.54683	2.48204	1.05134	2.54683	3.48552	0.97937	6.10653	1.27113	2.18924	4.57711	-0.3043	3.00561	0.29144																878.4	2.47417	2.14662	0.975347	2.238	2.65447
880.5	137.298	207.389	213.384	56.3996	24.234	-160.479	257.78	279.981	583.373	598.238	534.994	569.302	203.142		880.5	1.9894	1.81008	1.24877	2.76469	4.03253	1.80249	1.4379	1.27425	-0.8242	1.10074	4.61969	5.28322	1.77356																880.5	1.91674	1.47466	1.17278	2.45586	3.20148
882.6	138.036	206.271	213.578	55.9564	25.0793	-166.699	265.544	280.32	585.384	598.734	529.459	566.467	201.103		882.6	2.72367	0.69073	1.44609	2.31775	4.86124	-4.42378	9.19227	1.61707	1.19157	1.59596	-0.91033	2.45754	-0.26601																882.6	2.65101	0.355312	1.3701	2.00892	4.03019
884.7	137.298	206.495	213.481	56.2888	24.6567	-164.625	260.109	280.15	584.378	601.216	533.764	569.302	200.361		884.7	1.98174	0.91368	1.35232	2.64641	4.42205	-2.35656	3.74714	1.45039	0.18974	4.07709	3.39876	5.30225	-1.00808																884.7	1.90908	0.578262	1.27633	2.33758	3.591
886.8	137.482	206.942	213.384	56.0672	24.0931	-163.381	267.873	280.66	585.384	598.238	538.068	563.632	204.439		886.8	2.16241	1.36043	1.25844	2.42107	3.84185	-1.11873	11.5015	1.96311	1.1997	1.09721	7.70774	-0.35854	3.06894																886.8	2.08975	1.02501	1.18245	2.11224	3.0108
888.9	137.482	207.166	214.064	56.0672	24.234	-161.308	253.897	281.51	583.875	604.195	542.373	565.9	201.844		888.9	2.15858	1.58337	1.94117	2.41733	3.96616	0.94849	-2.48451	2.81573	-0.30503	7.05354	12.0168	1.91907	0.47337																888.9	2.08592	1.24795	1.86518	2.1085	3.13511
891	136.929	207.166	213.675	56.3996	24.234	-164.625	263.215	279.811	585.887	597.741	533.149	568.735	201.474		891	1.60115	1.58262	1.55609	2.74599	3.94957	-2.37508	6.82286	1.11995	1.71074	0.59836	2.79731	4.76379	0.10199																891	1.52849	1.2472	1.4801	2.43716	3.11852
893.1	137.113	206.942	213.19	56.178	23.8113	-163.796	263.215	279.301	583.875	598.238	533.149	567.034	202.4		893.1	1.78182	1.35817	1.07392	2.52065	3.51028	-1.55195	6.81283	0.61337	-0.29689	1.09369	2.8018	3.0722	1.02812																893.1	1.70916	1.02275	0.997927	2.21182	2.67923
895.2	136.56	206.047	213.384	55.9564	24.3749	-163.381	265.544	279.641	586.39	597.741	531.304	568.168	202.586		895.2	1.22439	0.46252	1.27134	2.29531	4.05729	-1.14343	9.1321	0.95629	2.22177	0.59601	0.96138	4.21571	1.21274																895.2	1.15173	0.127102	1.19535	1.98648	3.22624
897.3	137.482	208.284	212.899	56.2888	24.234	-163.796	260.885	279.131	580.355	597.245	538.068	571.003	202.215		897.3	2.14326	2.69897	0.78917	2.62397	3.8998	-1.5643	4.46337	0.44971	-3.80906	0.09834	7.73017	7.06042	0.84137																897.3	2.0706	2.36355	0.713177	2.31514	3.06875
899.4	137.298	207.613	213.869	56.3996	24.3749	-161.308	258.556	279.301	584.378	603.202	533.764	569.302	201.103		899.4	1.95493	2.02701	1.76319	2.73103	4.02411	0.91762	2.12405	0.62273	0.21821	6.05476	3.43016	5.36884	-0.2714																899.4	1.88227	1.69159	1.6872	2.4222	3.19306
901.5	137.298	207.389	213.772	55.7348	23.9522	-162.137	263.215	279.301	585.384	600.72	528.229	566.467	201.288		901.5	1.95109	1.80256	1.66932	2.06249	3.58481	0.08205	6.77272	0.62585	1.22817	3.57128	-2.09976	2.54315	-0.08668																901.5	1.87843	1.46714	1.59333	1.75366	2.75376
903.6	137.113	207.389	213.19	55.8456	23.6704	-162.137	256.227	279.811	587.899	600.72	529.459	568.735	202.771		903.6	1.76266	1.80181	1.09005	2.16955	3.28642	0.07587	-0.22531	1.13867	3.74674	3.57011	-0.86547	4.82086	1.39545																903.6	1.69	1.46639	1.01406	1.86072	2.45537
905.7	137.482	206.271	213.093	55.9564	23.5295	-162.137	262.438	279.641	586.39	597.245	530.689	561.931	201.103		905.7	2.12793	0.68246	0.99617	2.27661	3.12893	0.0697	5.97616	0.97189	2.24211	0.09363	0.36891	-1.97402	-0.27343																905.7	2.05527	0.347042	0.920177	1.96778	2.29788
907.8	136.929	205.823	213.287	55.9564	24.234	-165.455	265.544	280.32	586.893	601.713	534.379	566.467	203.327		907.8	1.5705	0.2343	1.1936	2.27287	3.81684	-3.25387	9.07193	1.65451	2.74907	4.56066	4.063	2.57169	1.9501																907.8	1.49784	-0.101118	1.11761	1.96404	2.98579
909.9	136.744	207.837	213.19	55.8456	23.8113	-164.625	258.556	278.961	582.87	597.741	535.609	566.467	202.03		909.9	1.38217	2.24705	1.09972	2.15833	3.37755	-2.43065	2.07391	0.29853	-1.27016	0.58778	5.29738	2.5812	0.65203																909.9	1.30951	1.91163	1.02373	1.8495	2.5465
912	137.851	207.613	213.384	55.4024	24.5158	-165.04	260.109	280.49	585.384	600.223	535.609	571.57	202.4		912	2.48554	2.0225	1.29715	1.71139	4.06546	-2.85152	3.61678	1.83065	1.24851	3.06891	5.30187	7.69401	1.02205																912	2.41288	1.68708	1.22116	1.40256	3.23441
914.1	137.851	207.166	213.093	56.5104	23.9522	-160.479	260.885	279.641	586.893	602.209	535.609	569.302	202.771		914.1	2.48171	1.57435	1.00907	2.81565	3.48527	1.7037	4.38315	0.98437	2.76128	5.05363	5.30636	5.43543	1.39208																914.1	2.40905	1.23893	0.933077	2.50682	2.65422
916.2	137.667	206.495	213.19	56.0672	23.5295	-166.284	267.097	279.301	581.864	594.762	530.074	562.498	201.659		916.2	2.29338	0.90239	1.1094	2.36871	3.04598	-4.10787	10.5847	0.64769	-2.26376	-2.39454	-0.22356	-1.35946	0.2793																916.2	2.22072	0.566972	1.03341	2.05988	2.21493
918.3	136.929	207.389	212.607	55.8456	24.234	-162.137	263.215	279.641	580.858	603.202	531.304	568.735	201.844		918.3	1.55135	1.79654	0.53012	2.14337	3.73388	0.03265	6.69249	0.99062	-3.26549	6.04418	1.01073	4.88745	0.46393																918.3	1.47869	1.46112	0.454127	1.83454	2.90283
920.4	137.482	207.166	213.481	55.9564	23.9522	-161.308	265.544	278.961	581.361	596.252	534.379	568.168	201.844		920.4	2.10112	1.57209	1.40715	2.25043	3.43549	0.85588	9.01177	0.31414	-2.75852	-0.90749	4.08991	4.32986	0.46325																920.4	2.02846	1.23667	1.33116	1.9416	2.60444
922.5	136.56	206.718	213.19	55.624	23.2477	-160.064	263.215	277.942	583.373	600.72	533.149	573.838	202.03		922.5	1.17459	1.12384	1.11907	1.91429	2.7144	2.09371	6.67244	-0.70204	-0.74286	3.55953	2.8646	10.0098	0.64798																922.5	1.10193	0.788422	1.04308	1.60546	1.88335
924.6	137.667	207.837	212.316	55.8456	24.234	-162.967	261.662	278.112	585.887	600.72	533.764	571.003	201.474		924.6	2.27806	2.24178	0.2486	2.13215	3.68411	-0.81517	5.10951	-0.52902	1.77581	3.55836	3.48398	7.18409	0.09121																924.6	2.2054	1.90636	0.172607	1.82332	2.85306
926.7	138.036	206.942	213.384	55.8456	24.6567	-157.576	263.215	279.641	582.87	597.741	531.919	566.467	203.327		926.7	2.64322	1.34613	1.31973	2.12841	4.09022	4.56936	6.65238	1.0031	-1.23762	0.57838	1.64367	2.6573	1.94403																926.7	2.57056	1.01071	1.24374	1.81958	3.25917
928.8	137.298	206.047	213.481	55.8456	24.234	-160.893	260.885	279.641	583.875	603.699	531.919	561.931	202.215		928.8	1.90129	0.45048	1.42005	2.12468	3.65093	1.24578	4.31295	1.00622	-0.22776	6.53471	1.64815	-1.86939	0.83126																928.8	1.82863	0.115062	1.34406	1.81585	2.81988
930.9	137.298	206.942	213.287	55.7348	24.0931	-162.137	257.003	279.471	586.39	599.231	532.534	567.601	202.956		930.9	1.89746	1.34463	1.22908	2.01014	3.49344	-0.00439	0.42072	0.83944	2.29091	2.06543	2.26754	3.81043	1.57198																930.9	1.8248	1.00921	1.15309	1.70131	2.66239
933	138.036	206.942	213.481	55.624	24.234	-162.552	267.873	280.66	584.881	599.231	534.994	568.168	201.659		933	2.63173	1.34387	1.4265	1.8956	3.61774	-0.42527	11.2809	2.03176	0.78618	2.06426	4.73183	4.38694	0.27391																933	2.55907	1.00845	1.35051	1.58677	2.78669
935.1	137.482	206.942	213.384	55.7348	23.3886	-162.137	267.873	279.641	582.367	599.231	530.689	568.168	201.288		935.1	2.0743	1.34312	1.33263	2.00266	2.75575	-0.01674	11.2709	1.01558	-1.72426	2.06308	0.43171	4.39645	-0.09746																935.1	2.00164	1.0077	1.25664	1.69383	1.9247
937.2	136.929	206.047	213.384	55.2916	23.9522	-163.796	271.756	281.34	586.893	600.72	533.149	564.199	204.068		937.2	1.51687	0.44747	1.33585	1.55572	3.30276	-1.68161	15.1431	2.7176	2.80601	3.55131	2.896	0.43676	2.68206																937.2	1.44421	0.112052	1.25986	1.24689	2.47171
939.3	137.667	206.495	213.481	55.8456	23.8113	-162.137	255.45	279.641	581.864	597.741	534.994	565.9	201.288		939.3	2.25124	0.89412	1.43618	2.10598	3.14527	-0.02909	-1.17229	1.02182	-2.21902	0.57133	4.74528	2.14738	-0.09881																939.3	2.17858	0.558702	1.36019	1.79715	2.31422
941.4	137.667	207.166	212.996	56.0672	24.234	-160.479	267.097	279.131	581.864	597.245	534.994	561.364	202.215		941.4	2.24741	1.56457	0.954	2.32384	3.55138	1.62344	10.4644	0.51524	-2.21495	0.07366	4.74977	-2.37941	0.82721																941.4	2.17475	1.22915	0.878007	2.01501	2.72033
943.5	137.113	207.166	213.675	55.624	23.5295	-162.967	259.332	280.15	586.39	600.223	533.149	564.199	203.327		943.5	1.68988	1.56381	1.63673	1.8769	2.83029	-0.87074	2.68986	1.53776	2.31531	3.05128	2.90945	0.4653	1.93864																943.5	1.61722	1.22839	1.56074	1.56807	1.99924
945.6	136.56	207.389	213.093	56.178	24.0931	-163.796	263.991	280.15	581.361	596.252	531.919	564.766	203.512		945.6	1.13245	1.78676	1.05745	2.42716	3.3773	-1.70631	7.33853	1.54088	-2.70972	-0.92159	1.68404	1.04181	2.12327																945.6	1.05979	1.45134	0.981457	2.11833	2.54625
947.7	136.56	206.718	213.772	55.624	24.3749	-162.967	261.662	280.66	583.373	599.231	533.149	568.168	202.586		947.7	1.12862	1.11481	1.74028	1.86942	3.64251	-0.88309	4.9992	2.0536	-0.69405	2.05603	2.91842	4.45353	1.19589																947.7	1.05596	0.779392	1.66429	1.56059	2.81146
949.8	135.821	206.495	213.384	55.5132	24.5158	-161.723	263.215	279.131	585.384	596.252	531.304	568.168	201.844		949.8	0.38659	0.89036	1.35521	1.75488	3.76681	0.35474	6.54207	0.52772	1.32171	-0.92394	1.07801	4.46304	0.45382																949.8	0.313935	0.554942	1.27922	1.44605	2.93576
951.9	136.744	206.718	212.802	56.178	23.6704	-163.381	260.109	279.471	583.373	597.741	534.379	563.065	202.4		951.9	1.30555	1.1133	0.77593	2.41594	2.90482	-1.31014	3.42624	0.87064	-0.68592	0.56428	4.1572	-0.63075	1.00924																951.9	1.23289	0.777882	0.699937	2.10711	2.07377
954	137.851	206.718	213.19	56.0672	23.9522	-164.211	260.109	279.641	584.881	599.231	535.609	569.302	203.142		954	2.40892	1.11255	1.16746	2.3014	3.17003	-2.14571	3.41622	1.04366	0.82685	2.05251	5.39158	5.61617	1.74997																954	2.33626	0.777132	1.09147	1.99257	2.33898
956.1	136.929	206.718	212.996	55.5132	24.6567	-162.967	265.544	279.981	583.373	595.259	527.614	563.065	202.4		956.1	1.48239	1.1118	0.97658	1.74366	3.85794	-0.90778	8.84129	1.38658	-0.67779	-1.92037	-2.59813	-0.61172	1.00789																956.1	1.40973	0.776382	0.900587	1.43483	3.02689
958.2	136.744	206.495	213.093	55.7348	23.1068	-162.967	266.32	280.49	581.864	598.734	533.764	565.333	201.474		958.2	1.29406	0.88735	1.07681	1.96152	2.29145	-0.91396	9.60776	1.8993	-2.18242	1.55365	3.55575	1.66599	0.08042																958.2	1.2214	0.551932	1.00082	1.65269	1.4604
960.3	136.56	206.942	213.384	55.624	24.5158	-164.211	260.109	278.961	582.87	596.748	528.229	565.9	202.03		960.3	1.10563	1.33409	1.37133	1.84698	3.68386	-2.16423	3.38613	0.37342	-1.17255	-0.43332	-1.97416	2.2425	0.63585																960.3	1.03297	0.998672	1.29534	1.53815	2.85281
962.4	138.036	206.271	213.093	55.8456	24.0931	-161.308	260.109	279.981	579.852	597.245	535.609	567.601	201.103		962.4	2.5781	0.66214	1.08326	2.06484	3.24457	0.73239	3.3761	1.39594	-4.18589	0.0619	5.40952	3.95312	-0.29163																962.4	2.50544	0.326722	1.00727	1.75601	2.41352
964.5	136.375	206.495	212.219	55.4024	23.3886	-160.893	265.544	279.131	584.378	597.245	534.379	566.467	202.03		964.5	0.91347	0.88509	0.21278	1.6179	2.52347	1.14082	8.80117	0.54956	0.34428	0.06073	4.18411	2.82853	0.6345																964.5	0.840815	0.549672	0.136787	1.30907	1.69242
966.6	137.113	206.271	212.802	55.5132	22.9659	-162.137	258.556	279.131	578.846	593.769	534.379	565.9	202.586		966.6	1.64774	0.66064	0.79851	1.72496	2.08418	-0.10936	1.80315	0.55268	-5.18355	-3.41565	4.1886	2.27104	1.18982																966.6	1.57508	0.325222	0.722517	1.41613	1.25313
968.7	136.744	207.166	213.287	55.5132	23.9522	-162.137	267.873	278.961	580.355	600.72	531.919	567.034	201.844		968.7	1.27491	1.55478	1.28713	1.72122	3.05389	-0.11553	11.1104	0.3859	-3.67078	3.53368	1.73338	3.41465	0.44775																968.7	1.20225	1.21936	1.21114	1.41239	2.22284
970.8	136.56	207.166	213.093	55.5132	23.6704	-161.308	257.78	281.679	589.408	599.727	534.379	565.333	201.103		970.8	1.08648	1.55403	1.09616	1.71748	2.7555	0.7077	1.00669	3.10732	5.38558	2.5395	4.19757	1.72307	-0.29432																970.8	1.01382	1.21861	1.02017	1.40865	1.92445
972.9	136.56	206.942	212.802	55.8456	23.5295	-164.211	261.662	279.641	585.384	598.734	531.304	565.9	201.474		972.9	1.08265	1.32958	0.80819	2.04614	2.59801	-2.20128	4.87886	1.07174	1.36645	1.54543	1.12735	2.29958	0.0757																972.9	1.00999	0.994162	0.732197	1.73731	1.76696
975	136.56	206.271	212.704	55.5132	23.6704	-161.723	263.215	281	584.881	597.245	532.534	562.498	202.771		975	1.07881	0.65763	0.71431	1.71	2.72232	0.28065	6.42173	2.43396	0.86752	0.05485	2.36174	-1.09311	1.37253																975	1.00615	0.322212	0.638317	1.40117	1.89127
977.1	136.006	207.166	212.899	55.7348	23.5295	-161.308	261.662	279.471	587.899	601.713	530.689	568.735	201.474		977.1	0.52138	1.55178	0.91174	1.92786	2.56483	0.68917	4.85881	0.90808	3.88908	4.52188	0.52142	5.1538	0.07435																977.1	0.448725	1.21636	0.835747	1.61903	1.73378
979.2	136.56	206.047	213.481	55.4024	23.3886	-159.649	264.768	279.131	586.39	597.741	534.379	561.931	200.361		979.2	1.07115	0.43242	1.49746	1.59172	2.40734	2.3416	7.95458	0.5714	2.38445	0.549	4.21551	-1.64108	-1.03842																979.2	0.998495	0.0970024	1.42147	1.28289	1.57629
981.3	137.482	206.271	212.316	55.07	22.5432	-158.82	258.556	279.301	583.875	599.231	533.764	561.931	201.844		981.3	1.99002	0.65537	0.33569	1.25558	1.54534	3.16482	1.73295	0.74442	-0.12608	2.03723	3.60509	-1.63157	0.4437																981.3	1.91736	0.319952	0.259697	0.946755	0.714286
983.4	136.929	206.047	212.607	56.2888	23.1068	-159.235	256.227	281.17	588.402	598.734	532.534	568.168	202.4		983.4	1.43259	0.43092	0.63011	2.47064	2.09235	2.74395	-0.60638	2.61634	4.40418	1.53955	2.37968	4.61524	0.99913																983.4	1.35993	0.0955024	0.554117	2.16181	1.2613
985.5	136.006	207.166	212.413	55.7348	23.6704	-161.308	263.991	278.621	581.864	601.713	529.459	560.797	202.771		985.5	0.50606	1.54877	0.43924	1.9129	2.63936	0.66448	7.14799	0.07106	-2.12955	4.51718	-0.69053	-2.74665	1.36916																985.5	0.433405	1.21335	0.363247	1.60407	1.80831
987.6	136.56	207.166	213.19	55.4024	23.6704	-162.967	263.991	280.15	585.384	597.741	536.223	568.168	202.215		987.6	1.05583	1.54801	1.21906	1.57676	2.62277	-1.0004	7.13797	1.60328	1.39492	0.5443	6.07825	4.63427	0.81238																987.6	0.983175	1.21259	1.14307	1.26793	1.79172
989.7	135.821	207.389	212.704	55.07	23.5295	-159.649	263.215	279.301	585.887	596.748	531.304	567.601	202.4		989.7	0.3138	1.77096	0.73689	1.24062	2.46528	2.31073	6.35154	0.7569	1.90189	-0.44977	1.16324	4.07678	0.99711																989.7	0.241145	1.43554	0.660897	0.931795	1.63423
991.8	136.375	205.823	212.316	55.5132	24.6567	-163.796	260.109	278.961	583.373	599.231	533.149	563.632	201.474		991.8	0.86367	0.20421	0.35181	1.68008	3.57589	-1.84215	3.23571	0.42022	-0.60865	2.03135	3.01262	0.11709	0.06963																991.8	0.791015	-0.131208	0.275817	1.37125	2.74484
993.9	135.821	206.718	212.802	55.7348	24.234	-161.723	263.215	280.15	589.91	600.72	529.459	566.467	202.4		993.9	0.30614	1.09826	0.84044	1.89794	3.1366	0.22508	6.33148	1.61264	5.93322	3.51958	-0.67259	2.96171	0.99576																993.9	0.233485	0.762842	0.764447	1.58911	2.30555
996	136.56	207.166	212.996	55.2916	23.9522	-164.211	260.885	280.49	584.378	597.245	533.149	564.199	202.586		996	1.04051	1.545	1.03787	1.451	2.8382	-2.2692	3.99205	1.95546	0.40529	0.0431	3.02159	0.70312	1.18039																996	0.967855	1.20958	0.961877	1.14217	2.00715
998.1	136.56	204.929	212.607	55.1808	23.9522	-163.381	253.121	279.641	582.367	595.755	531.919	567.034	200.732		998.1	1.03668	-0.69295	0.65269	1.33646	2.82161	-1.44597	-3.78238	1.10918	-1.60225	-1.44747	1.79618	3.54783	-0.67379																998.1	0.964025	-1.02837	0.576697	1.02763	1.99056
1000.2	136.929	205.823	213.19	55.2916	23.5295	-161.723	270.203	279.641	583.875	597.741	528.229	567.034	200.732		1000.2	1.40194	0.2012	1.23842	1.44352	2.38232	0.20656	13.2894	1.1123	-0.08948	0.53725	-1.88893	3.55734	-0.67446																1000.2	1.32928	-0.134218	1.16243	1.13469	1.55127
1002.3	138.036	205.376	212.899	55.5132	23.5295	-160.893	265.544	278.791	586.893	595.259	533.149	566.467	203.142		1002.3	2.50531	-0.24705	0.95044	1.66138	2.36573	1.02968	8.62067	0.26592	2.93209	-1.94622	3.03505	2.99976	1.73446																1002.3	2.43265	-0.582468	0.874447	1.35255	1.53468
1004.4	136.744	206.047	213.093	55.8456	23.3886	-165.869	254.674	279.131	582.87	596.252	537.453	563.632	200.547		1004.4	1.20978	0.42339	1.14777	1.99004	2.20824	-3.95259	-2.25956	0.60884	-1.08715	-0.9545	7.34404	0.17417	-0.86111																1004.4	1.13712	0.0879724	1.07178	1.68121	1.37719
1006.5	136.56	206.718	212.996	55.2916	23.9522	-160.064	259.332	278.112	588.402	598.734	534.994	562.498	201.288		1006.5	1.02135	1.09374	1.05399	1.4323	2.75525	1.84673	2.38901	-0.40734	4.44892	1.52663	4.88882	-0.95042	-0.12039																1006.5	0.948695	0.758322	0.977997	1.12347	1.9242
1008.6	136.375	206.271	212.413	55.07	23.3886	-161.723	265.544	279.301	584.378	597.741	530.074	564.199	199.805		1008.6	0.83302	0.64559	0.47472	1.20696	2.17506	0.18186	8.59058	0.78498	0.42969	0.53255	-0.02619	0.76019	-1.60386																1008.6	0.760365	0.310172	0.398727	0.898135	1.34401
1010.7	136.744	206.942	212.316	55.4024	23.5295	-160.479	265.544	279.471	582.367	595.259	530.689	565.9	202.771		1010.7	1.19829	1.31604	0.38084	1.53562	2.29937	1.41968	8.58056	0.958	-1.57785	-1.95093	0.59319	2.47081	1.36107																1010.7	1.12563	0.980622	0.304847	1.22679	1.46832
1012.8	136.56	206.718	212.802	55.8456	23.8113	-162.967	262.438	279.641	586.893	596.252	530.074	569.302	200.917		1012.8	1.00986	1.09149	0.86947	1.97508	2.56457	-1.07449	5.46473	1.13102	2.95242	-0.9592	-0.01722	5.88252	-0.49311																1012.8	0.937205	0.756072	0.793477	1.66625	1.73352
1014.9	135.821	206.495	212.704	55.2916	23.8113	-159.235	260.885	277.092	584.881	597.245	530.689	563.065	201.844		1014.9	0.26783	0.86703	0.77559	1.41734	2.54798	2.65133	3.9018	-1.41426	0.94479	0.03252	0.60216	-0.34537	0.43292																1014.9	0.195175	0.531612	0.699597	1.10851	1.71693
1017	136.56	207.389	212.802	55.07	23.6704	-162.552	260.885	277.772	581.361	597.245	533.764	568.735	201.659		1017	1.0022	1.76118	0.87592	1.192	2.39049	-0.67224	3.89177	-0.73154	-2.57144	0.03135	3.68135	5.33454	0.24694																1017	0.929545	1.42576	0.799927	0.883175	1.55944
1019.1	135.637	206.718	212.899	54.6268	23.3886	-163.381	260.109	280.15	579.852	597.741	531.919	567.034	203.142		1019.1	0.07567	1.08923	0.97625	0.74506	2.0921	-1.50771	3.10534	1.65008	-4.07608	0.52667	1.84104	3.64296	1.72907																1019.1	0.00301453	0.753812	0.900257	0.436235	1.26105
1021.2	136.375	206.718	212.316	54.4051	23.3886	-162.552	265.544	278.451	582.87	600.223	538.068	563.632	203.142		1021.2	0.81004	1.08848	0.39697	0.51962	2.07551	-0.68459	8.53041	-0.04579	-1.05461	3.0078	7.99482	0.25027	1.7284																1021.2	0.737385	0.753062	0.320977	0.210795	1.24446
1023.3	137.113	206.495	212.413	55.07	23.5295	-162.967	254.674	278.621	581.864	595.259	531.304	565.333	201.659		1023.3	1.54431	0.86402	0.4973	1.18079	2.19982	-1.10536	-2.34981	0.12723	-2.05634	-1.95798	1.23501	1.96088	0.24492																1023.3	1.47165	0.528602	0.421307	0.871965	1.36877
1025.4	136.929	206.718	212.996	55.9564	23.6704	-163.381	260.109	279.471	582.87	598.734	534.379	569.869	201.474		1025.4	1.35597	1.08697	1.08302	2.06345	2.32413	-1.52624	3.07526	0.97985	-1.04648	1.51605	4.31419	6.50659	0.05885																1025.4	1.28331	0.751552	1.00703	1.75462	1.49308
1027.5	136.375	206.718	213.093	55.4024	24.5158	-160.893	262.438	277.942	584.881	600.223	531.919	568.168	201.288		1027.5	0.79854	1.08622	1.18325	1.50571	3.15293	0.95559	5.39453	-0.54603	0.96919	3.00427	1.85898	4.81501	-0.12713																1027.5	0.725885	0.750802	1.10726	1.19688	2.32188
1029.6	136.929	207.166	212.802	54.9592	23.9522	-162.137	257.003	279.471	586.893	600.72	531.304	561.364	200.547		1029.6	1.34831	1.53297	0.89527	1.05877	2.57274	-0.29459	-0.0506	0.98609	2.98496	3.4996	1.24846	-1.97988	-0.8692																1029.6	1.27565	1.19755	0.819277	0.749945	1.74169
1031.7	136.006	206.495	212.704	55.07	23.9522	-162.137	257.003	277.772	580.355	598.238	532.534	564.766	202.771		1031.7	0.42178	0.86101	0.8014	1.16583	2.55615	-0.30076	-0.06063	-0.70969	-3.54878	1.01612	2.48285	1.43183	1.35433																1031.7	0.349125	0.525592	0.725407	0.857005	1.7251
1033.8	136.929	206.718	212.802	55.2916	23.8113	-161.723	260.109	280.15	583.373	598.238	529.459	557.962	201.474		1033.8	1.34065	1.08396	0.90172	1.38369	2.39866	0.10777	3.03515	1.67193	-0.52731	1.01495	-0.58737	-5.36306	0.05615																1033.8	1.26799	0.748542	0.825727	1.07486	1.56761
1035.9	136.375	205.376	212.51	55.4024	23.9522	-164.625	258.556	279.131	581.864	600.72	531.919	563.632	200.361		1035.9	0.78322	-0.25909	0.61365	1.49075	2.52297	-2.80111	1.47222	0.65565	-2.03194	3.49607	1.87692	0.31686	-1.05662																1035.9	0.710565	-0.594508	0.537657	1.18192	1.69192
1038	135.637	205.823	212.704	55.1808	23.3886	-158.405	260.885	279.811	589.408	600.223	531.919	561.931	201.844		1038	0.04119	0.18766	0.81107	1.26541	1.94278	3.41282	3.79149	1.33837	5.51572	2.9984	1.88141	-1.37473	0.4255																1038	-0.0314655	-0.147758	0.735077	0.956585	1.11173
1040.1	135.637	205.6	212.802	55.5132	23.6704	-165.455	257.003	279.641	585.384	598.734	534.379	564.199	201.288		1040.1	0.03736	-0.0369	0.9114	1.59407	2.20799	-3.64286	-0.10074	1.17159	1.49659	1.50782	4.34559	0.90288	-0.13117																1040.1	-0.0352955	-0.372318	0.835407	1.28524	1.37694
1042.2	135.637	206.718	212.025	55.2916	23.5295	-162.552	263.215	278.961	582.87	597.245	531.304	567.034	201.103		1042.2	0.03353	1.08095	0.13793	1.36873	2.0505	-0.74633	6.10083	0.49511	-1.01394	0.01725	1.27538	3.7476	-0.31725																1042.2	-0.0391255	0.745532	0.0619365	1.0599	1.21945
1044.3	137.298	206.942	212.316	55.4024	23.1068	-160.479	257.003	278.961	585.384	594.762	528.844	560.23	201.659		1044.3	1.6906	1.304	0.43245	1.47579	1.6112	1.32089	-0.12079	0.49823	1.50473	-2.46623	-1.17984	-3.04739	0.23818																1044.3	1.61794	0.968582	0.356457	1.16696	0.780146
1046.4	136.375	206.495	212.025	54.9592	23.5295	-162.137	261.662	279.471	579.852	597.741	537.453	565.333	200.732		1046.4	0.76407	0.85575	0.14438	1.02885	2.01731	-0.34398	4.52788	1.01105	-4.02321	0.5114	7.43375	2.06552	-0.68929																1046.4	0.691415	0.520332	0.0683865	0.720025	1.18626
1048.5	136.375	206.047	212.607	55.5132	23.1068	-162.137	257.003	279.981	583.875	597.245	533.149	561.931	201.844		1048.5	0.76023	0.40759	0.7301	1.57911	1.57802	-0.35015	-0.14085	1.52387	0.00406	0.01372	3.13373	-1.32717	0.42213																1048.5	0.687575	0.0721724	0.654107	1.27028	0.746966
1050.6	136.006	206.271	212.219	55.2916	23.5295	-163.381	269.426	278.112	586.39	599.231	529.459	567.601	200.917		1050.6	0.3873	0.63054	0.34503	1.35377	1.98413	-1.60033	12.2722	-0.34181	2.52273	1.99845	-0.55148	4.35265	-0.50524																1050.6	0.314645	0.295122	0.269037	1.04494	1.15308
1052.7	136.744	205.376	212.607	55.07	23.9522	-160.064	260.109	279.131	581.864	597.245	533.764	563.065	200.361		1052.7	1.12167	-0.26511	0.73655	1.12843	2.39024	1.7109	2.94489	0.68061	-1.99941	0.01137	3.75761	-0.17414	-1.06202																1052.7	1.04901	-0.600528	0.660557	0.819605	1.55919
1054.8	136.929	205.6	212.899	55.4024	23.6704	-161.308	256.227	278.621	581.361	595.259	533.764	563.065	200.732		1054.8	1.30234	-0.04216	1.03108	1.45709	2.09185	0.46072	-0.94734	0.17403	-2.49824	-1.9756	3.76209	-0.16463	-0.69199																1054.8	1.22968	-0.377578	0.955087	1.14826	1.2608
1056.9	136.929	205.823	212.51	54.516	22.825	-162.967	259.332	278.791	589.408	598.734	535.609	568.168	202.215		1056.9	1.29851	0.18089	0.6459	0.56695	1.22986	-1.20415	2.14834	0.34705	5.55233	1.49842	5.61138	4.94818	0.79014																1056.9	1.22585	-0.154528	0.569907	0.258125	0.398806
1059	136.191	206.271	212.51	54.6268	23.3886	-161.723	260.109	278.282	584.378	600.223	531.919	564.199	202.03		1059	0.55648	0.62753	0.64913	0.67401	1.77687	0.03367	2.91481	-0.15943	0.52729	2.98665	1.92626	0.9885	0.60416																1059	0.483825	0.292112	0.573137	0.365185	0.945816
1061.1	136.191	205.376	212.704	54.8484	24.3749	-160.893	266.32	278.791	583.373	597.741	532.534	564.766	201.844		1061.1	0.55265	-0.26812	0.84655	0.89187	2.74657	0.8568	9.11638	0.35329	-0.47444	0.50317	2.54565	1.56501	0.41809																1061.1	0.479995	-0.603538	0.770557	0.583045	1.91552
1063.2	135.268	206.271	212.219	54.9592	23.8113	-161.308	259.332	279.301	579.349	598.238	532.534	560.797	201.844		1063.2	-0.37388	0.62603	0.36438	0.99893	2.16638	0.43602	2.11825	0.86611	-4.49357	0.9985	2.55013	-2.39468	0.41741																1063.2	-0.446535	0.290612	0.288387	0.690105	1.33533
1065.3	135.637	205.152	212.316	55.5132	23.5295	-161.308	257.78	279.981	583.875	601.216	531.919	563.065	201.844		1065.3	-0.00861	-0.49332	0.46471	1.54919	1.86799	0.42985	0.55542	1.54883	0.0366	3.97602	1.93972	-0.11707	0.41674																1065.3	-0.0812655	-0.828738	0.388717	1.24036	1.03694
1067.4	135.821	204.481	212.899	55.2916	23.5295	-164.625	258.556	279.131	581.864	597.741	530.689	565.9	200.917		1067.4	0.17206	-1.16528	1.05043	1.32385	1.8514	-2.89372	1.3218	0.70245	-1.97094	0.49964	0.7143	2.72765	-0.51064																1067.4	0.0994045	-1.5007	0.974437	1.01502	1.02035
1069.5	136.191	205.6	212.413	55.2916	24.0931	-161.308	262.438	278.791	588.402	594.762	537.453	560.23	202.586		1069.5	0.53733	-0.04743	0.56826	1.32011	2.39841	0.4175	5.19397	0.36577	4.57093	-2.48033	7.48309	-2.93324	1.15679																1069.5	0.464675	-0.382848	0.492267	1.01128	1.56736
1071.6	136.375	206.271	212.51	54.8484	23.3886	-159.235	260.885	280.32	579.852	602.209	531.304	566.467	201.844		1071.6	0.7181	0.62302	0.66848	0.87317	1.67732	2.48463	3.63104	1.89789	-3.9744	4.96549	1.33818	3.31367	0.41472																1071.6	0.645445	0.287602	0.592487	0.564345	0.846266
1073.7	135.821	206.271	212.025	54.6268	23.3886	-160.893	255.45	280.32	581.864	598.238	536.223	566.467	202.586		1073.7	0.16056	0.62227	0.18631	0.64783	1.66073	0.81975	-1.81409	1.90101	-1.95874	0.99262	6.26216	3.32318	1.15544																1073.7	0.0879045	0.286852	0.110317	0.339005	0.829676
1075.8	136.56	206.495	212.607	55.1808	23.2477	-162.552	254.674	278.791	583.373	594.266	532.534	567.034	202.586		1075.8	0.89493	0.84521	0.77203	1.19809	1.50323	-0.84512	-2.60052	0.37513	-0.44597	-2.98026	2.57705	3.8998	1.15477																1075.8	0.822275	0.509792	0.696037	0.889265	0.672176
1077.9	136.191	206.271	212.607	55.07	23.2477	-159.235	260.109	279.301	580.858	594.762	530.074	560.797	201.659		1077.9	0.522	0.62076	0.77526	1.08355	1.48664	2.4661	2.82456	0.88795	-2.9564	-2.48503	0.12183	-2.32809	0.22739																1077.9	0.449345	0.285342	0.699267	0.774725	0.655586
1080	136.929	206.942	212.316	54.8484	23.5295	-161.308	262.438	279.131	585.384	599.231	528.844	561.931	201.474		1080	1.25637	1.29121	0.48728	0.85821	1.75185	0.38663	5.14383	0.72117	1.57386	1.98199	-1.10358	-1.18448	0.04132																1080	1.18371	0.955792	0.411287	0.549385	0.920796
1082.1	136.191	206.271	212.219	54.8484	23.6704	-160.064	257.78	278.961	585.384	594.266	533.764	563.065	201.103		1082.1	0.51434	0.61926	0.39341	0.85447	1.87616	1.62446	0.4752	0.55439	1.57793	-2.98378	3.8204	-0.04096	-0.33005																1082.1	0.441685	0.283842	0.317417	0.545645	1.04511
1084.2	136.375	204.929	212.607	54.8484	23.6704	-160.479	261.662	279.131	588.402	597.245	538.068	564.199	202.03		1084.2	0.69511	-0.7238	0.78493	0.85073	1.85957	1.20358	4.34737	0.72741	4.5994	-0.00626	8.12939	1.10265	0.59607																1084.2	0.622455	-1.05922	0.708937	0.541905	1.02852
1086.3	136.56	206.047	212.51	55.07	23.6704	-162.137	263.215	279.981	580.355	599.231	533.764	557.962	201.474		1086.3	0.87578	0.39405	0.69106	1.06859	1.84298	-0.46129	5.89024	1.58003	-3.44304	1.97847	3.82938	-5.12524	0.0393																1086.3	0.803125	0.0586324	0.615067	0.759765	1.01193
1088.4	136.191	206.047	212.802	54.7376	23.5295	-159.235	256.227	277.942	582.367	596.252	533.764	569.302	202.215		1088.4	0.50285	0.3933	0.98559	0.73245	1.68549	2.43523	-1.10779	-0.45555	-1.42737	-1.00151	3.83386	6.22497	0.78002																1088.4	0.430195	0.0578824	0.909597	0.423625	0.854436
1090.5	137.113	206.271	212.704	54.6268	22.6841	-162.967	253.897	279.981	581.864	599.231	531.919	564.766	200.917		1090.5	1.42172	0.61625	0.89171	0.61791	0.8235	-1.30294	-3.44721	1.58627	-1.9262	1.97612	1.99355	1.69819	-0.51805																1090.5	1.34906	0.280832	0.815717	0.309085	-0.00755442
1092.6	135.452	205.823	211.928	54.9592	23.1068	-160.479	262.438	279.131	582.367	600.223	528.844	560.797	201.474		1092.6	-0.24291	0.1681	0.11834	0.94657	1.2296	1.17888	5.08366	0.73989	-1.41923	2.96784	-1.07667	-2.2615	0.03727																1092.6	-0.315565	-0.167318	0.0423465	0.637745	0.398546
1094.7	136.191	205.6	212.219	55.2916	23.3886	-159.235	260.885	279.641	581.361	596.748	527.614	561.931	201.844		1094.7	0.49136	-0.05646	0.41276	1.27523	1.49481	2.41671	3.52073	1.25271	-2.42097	-0.50853	-2.30208	-1.11789	0.4073																1094.7	0.418705	-0.391878	0.336767	0.966405	0.663756
1096.8	136.191	206.271	212.122	55.2916	22.9659	-163.796	263.991	278.112	584.881	596.252	527	564.199	201.474		1096.8	0.48753	0.61399	0.31889	1.27149	1.05552	-2.15086	6.6165	-0.27317	1.1034	-1.00621	-2.9125	1.15972	0.03593																1096.8	0.414875	0.278572	0.242897	0.962665	0.224466
1098.9	135.637	206.271	212.219	55.2916	22.9659	-160.893	255.45	279.131	579.349	599.727	528.229	565.333	202.03		1098.9	-0.06991	0.61324	0.41921	1.26775	1.03893	0.74566	-1.93443	0.74925	-4.42443	2.46782	-1.67811	2.30334	0.59135																1098.9	-0.142565	0.277822	0.343217	0.958925	0.207876
1101	136.375	206.271	212.025	54.8484	23.2477	-160.479	262.438	278.451	586.893	599.231	533.764	563.632	201.288		1101	0.66446	0.61249	0.22824	0.82081	1.30414	1.15419	5.04355	0.07277	3.12323	1.97024	3.86077	0.61175	-0.15072																1101	0.591805	0.277072	0.152247	0.511985	0.473086
1103.1	136.929	206.942	212.802	54.7376	23.3886	-165.455	266.32	279.131	582.87	599.727	528.844	559.663	202.586		1103.1	1.21423	1.28293	1.00816	0.70627	1.42845	-3.82809	8.91582	0.75549	-0.896	2.46547	-1.05424	-3.34804	1.146																1103.1	1.14157	0.947512	0.932167	0.397445	0.597396
1105.2	136.191	206.495	212.316	54.8484	22.9659	-156.747	267.097	278.621	588.905	597.741	533.764	564.766	199.62		1105.2	0.4722	0.83468	0.52599	0.81333	0.98916	4.87394	9.68219	0.24891	5.14297	0.47849	3.86975	1.76477	-1.82027																1105.2	0.399545	0.499262	0.449997	0.504505	0.158106
1107.3	136.191	205.6	211.831	54.9592	23.3886	-162.137	263.215	279.811	583.373	595.755	534.379	567.601	200.732		1107.3	0.46837	-0.06097	0.04382	0.92039	1.39526	-0.52304	5.78996	1.44133	-0.38497	-1.50858	4.48913	4.60949	-0.70884																1107.3	0.395715	-0.396388	-0.0321735	0.611565	0.564206
1109.4	135.821	205.823	212.025	54.8484	23.9522	-161.723	260.885	278.621	585.887	598.734	528.844	563.632	201.103		1109.4	0.09544	0.16208	0.24114	0.80585	1.94227	-0.11451	3.45053	0.25515	2.1337	1.46904	-1.04078	0.6498	-0.33882																1109.4	0.0227845	-0.173338	0.165147	0.497025	1.11122
1111.5	135.637	206.271	212.51	54.6268	22.9659	-165.04	255.45	277.772	578.343	595.755	531.919	564.199	202.215		1111.5	-0.09289	0.60872	0.72977	0.58051	0.93938	-3.43808	-1.99459	-0.59113	-5.40593	-1.51093	2.0384	1.22631	0.77261																1111.5	-0.165545	0.273302	0.653777	0.271685	0.108326
1113.6	135.821	205.6	212.316	54.4051	22.825	-162.137	263.215	278.282	584.881	597.741	533.764	560.797	201.288		1113.6	0.08778	-0.06323	0.53889	0.35507	0.78189	-0.54156	5.75988	-0.07831	1.13593	0.47379	3.88769	-2.16638	-0.15477																1113.6	0.0151245	-0.398648	0.462897	0.0462446	-0.0491644
1115.7	136.191	206.047	212.219	54.8484	23.2477	-160.479	262.438	277.602	584.378	597.741	529.459	561.931	200.732		1115.7	0.45305	0.38352	0.44502	0.79463	1.188	1.11097	4.97335	-0.75479	0.6371	0.47262	-0.41243	-1.02276	-0.71154																1115.7	0.380395	0.0481024	0.369027	0.485805	0.356946
1117.8	135.637	206.495	212.219	55.07	23.5295	-162.967	259.332	278.112	582.367	598.238	530.074	563.632	202.586		1117.8	-0.10438	0.83017	0.44824	1.01249	1.45321	-1.38321	1.85752	-0.24197	-1.37043	0.96794	0.20706	0.68785	1.14129																1117.8	-0.177035	0.494752	0.372247	0.703665	0.622156
1119.9	135.452	205.6	211.928	54.9592	23.3886	-161.308	259.332	278.621	583.875	599.231	533.149	565.333	203.512		1119.9	-0.29271	-0.06549	0.16027	0.89796	1.29572	0.26932	1.84749	0.27075	0.14234	1.95966	3.28624	2.39846	2.06731																1119.9	-0.365365	-0.400908	0.0842765	0.589135	0.464666
1122	135.821	208.061	211.442	54.6268	22.6841	-164.211	257.78	280.49	581.361	598.238	533.764	563.065	201.288		1122	0.07246	2.39476	-0.32191	0.56182	0.57463	-2.63966	0.28466	2.14267	-2.3681	0.96559	3.90563	0.13977	-0.15746																1122	-0.000195474	2.05934	-0.397903	0.252995	-0.256424
1124.1	135.637	206.271	212.704	54.7376	22.825	-160.064	259.332	279.811	585.384	598.238	533.764	567.601	200.361		1124.1	-0.11588	0.60421	0.94332	0.66888	0.69893	1.50097	1.82744	1.4663	1.65927	0.96441	3.91012	4.68559	-1.08494																1124.1	-0.188535	0.268792	0.867327	0.360055	-0.132124
1126.2	136.375	205.823	212.316	54.7376	22.825	-162.967	265.544	279.641	582.87	597.741	533.149	564.199	201.659		1126.2	0.61849	0.15606	0.55824	0.66514	0.68234	-1.40791	8.02901	1.29952	-0.85126	0.46674	3.2997	1.2929	0.21189																1126.2	0.545835	-0.179358	0.482247	0.356315	-0.148714
1128.3	135.452	204.481	211.734	54.1835	22.5432	-163.381	263.991	278.451	588.402	596.252	531.919	564.766	202.956		1128.3	-0.30804	-1.18709	-0.02103	0.1073	0.38395	-1.82878	6.46608	0.11334	4.6848	-1.02384	2.07429	1.86941	1.50861																1128.3	-0.380695	-1.52251	-0.0970235	-0.201525	-0.447104
1130.4	136.006	205.376	212.025	54.9592	22.5432	-159.235	260.885	278.961	582.367	595.755	528.844	568.168	202.771		1130.4	0.24725	-0.29295	0.2734	0.87926	0.36736	2.31175	3.35025	0.62616	-1.34603	-1.52151	-0.99593	5.28113	1.32264																1130.4	0.174595	-0.628368	0.197407	0.570435	-0.463694
1132.5	135.637	206.271	212.122	54.6268	22.825	-163.381	260.885	279.981	581.864	596.748	527.614	564.199	199.805		1132.5	-0.11394	0.6012	0.37372	0.54312	0.63257	-1.84113	3.34022	1.64868	-1.84486	-0.52969	-2.22134	1.32144	-1.64363																1132.5	-0.186595	0.265782	0.297727	0.234295	-0.198484
1134.6	136.375	206.718	212.025	54.8484	23.5295	-168.772	258.556	278.451	582.367	599.727	537.453	565.333	201.659		1134.6	0.63216	1.04785	0.27985	0.76098	1.32048	-7.2381	1.0009	0.1227	-1.3379	2.44784	7.62214	2.46505	0.20919																1134.6	0.559505	0.712432	0.203857	0.452155	0.489426
1136.7	136.56	207.166	212.413	54.7376	23.8113	-160.479	255.45	278.451	581.361	601.713	529.459	566.467	199.805		1136.7	0.82456	1.4946	0.67147	0.64644	1.58569	1.04922	-2.11493	0.12582	-2.33963	4.43256	-0.36757	3.60856	-1.64498																1136.7	0.751905	1.15918	0.595477	0.337615	0.754636
1138.8	135.637	205.6	212.607	55.4024	23.8113	-163.381	254.674	280.32	581.864	598.734	531.919	565.333	202.03		1138.8	-0.09024	-0.07226	0.8688	1.3075	1.56909	-1.85965	-2.90136	1.99774	-1.83266	1.45259	2.09672	2.48408	0.57854																1138.8	-0.162895	-0.407678	0.792807	0.998675	0.738036
1140.9	135.637	206.271	212.51	54.6268	23.9522	-164.625	257.78	277.942	581.361	595.755	530.689	564.199	201.659		1140.9	-0.08234	0.59819	0.77492	0.52816	1.6934	-3.10983	0.19441	-0.37754	-2.33149	-1.52739	0.8713	1.35949	0.20717																1140.9	-0.154995	0.262772	0.698927	0.219335	0.862346
1143	136.375	205.152	211.831	54.8484	22.9659	-161.308	260.885	278.451	579.852	596.748	533.149	561.364	202.4		1143	0.66377	-0.52116	0.09865	0.74602	0.69051	0.2014	3.29008	0.13518	-3.83613	-0.53556	3.33559	-1.4662	0.9479																1143	0.591115	-0.856578	0.0226565	0.437195	-0.140544
1145.1	136.006	204.481	211.831	54.6268	23.1068	-161.723	256.227	280.15	586.893	602.706	534.379	564.199	201.103		1145.1	0.30257	-1.19311	0.10187	0.52068	0.81482	-0.21947	-1.37855	1.8373	3.20864	5.42076	4.56987	1.37851	-0.35028																1145.1	0.229915	-1.52853	0.0258765	0.211855	-0.0162344
1147.2	135.637	206.271	211.928	54.8484	22.9659	-161.308	260.885	280.32	586.893	599.231	527	562.498	202.586		1147.2	-0.05863	0.59593	0.2022	0.73854	0.65733	0.18905	3.27003	2.01022	3.21271	1.94439	-2.80484	-0.31307	1.13185																1147.2	-0.131285	0.260512	0.126207	0.429715	-0.173724
1149.3	135.637	205.823	211.928	54.2943	22.9659	-167.943	259.332	279.811	582.367	594.266	538.068	562.498	200.732		1149.3	-0.05073	0.14778	0.20542	0.1807	0.64074	-6.45192	1.7071	1.50374	-1.30943	-3.02139	8.26844	-0.30356	-0.72233																1149.3	-0.123385	-0.187638	0.129427	-0.128125	-0.190314
1151.4	135.452	206.718	211.54	55.07	22.825	-160.479	262.438	280.15	580.858	597.741	528.229	564.199	201.103		1151.4	-0.22732	1.04183	-0.17975	0.95266	0.48325	1.006	4.80287	1.84666	-2.81406	0.45264	-1.56597	1.40705	-0.3523																1151.4	-0.299975	0.706412	-0.255743	0.643835	-0.347804
1153.5	135.268	205.823	211.442	54.516	23.2477	-158.82	263.991	279.301	583.875	598.734	534.994	563.065	200.361		1153.5	-0.40402	0.14628	-0.27352	0.39492	0.88936	2.65853	6.34574	1.00028	0.20741	1.44436	5.20281	0.28246	-1.09438																1153.5	-0.476675	-0.189138	-0.349513	0.0860946	0.0583056
1155.6	134.714	206.495	211.928	54.2943	22.9659	-159.649	256.227	278.791	584.378	597.245	536.223	560.23	200.917		1155.6	-0.94972	0.81662	0.2151	0.16948	0.59096	1.82295	-1.42869	0.4937	0.71437	-0.04621	6.4371	-2.54322	-0.53895																1155.6	-1.02238	0.481202	0.139107	-0.139345	-0.240094
1157.7	136.56	205.6	211.928	54.516	23.6704	-162.137	256.227	279.471	584.881	598.238	533.149	559.096	200.176		1157.7	0.90358	-0.07903	0.21833	0.38744	1.27887	-0.67122	-1.43871	1.17642	1.22134	0.94561	3.36699	-3.66771	-1.28102																1157.7	0.830925	-0.414448	0.142337	0.0786146	0.447816
1159.8	135.637	204.705	211.928	54.6268	23.6704	-160.893	263.215	280.66	585.384	599.231	533.149	560.797	201.844		1159.8	-0.01122	-0.97458	0.22155	0.4945	1.26228	0.56661	5.53926	2.36874	1.72841	1.93734	3.37147	-1.9571	0.3864																1159.8	-0.0838755	-1.31	0.145557	0.185675	0.431226
1161.9	135.452	205.823	211.442	54.1835	23.5295	-160.064	258.556	279.301	584.378	599.231	530.074	564.766	202.956		1161.9	-0.18781	0.14327	-0.26062	0.04746	1.10479	1.38983	0.87053	1.01276	0.72657	1.93616	0.30126	2.02161	1.49783																1161.9	-0.260465	-0.192148	-0.336613	-0.261365	0.273736
1164	135.637	206.495	211.831	54.7376	22.825	-163.796	261.662	279.131	583.875	595.259	531.304	566.467	199.805		1164	0.00459	0.81362	0.1309	0.59782	0.3837	-2.34844	3.9663	0.84598	0.22774	-2.03671	1.53554	3.73223	-1.65375																1164	-0.0680655	0.478202	0.0549065	0.288995	-0.447354
1166.1	135.821	205.6	211.734	54.6268	23.3886	-159.235	259.332	278.112	582.87	598.238	526.385	562.498	201.844		1166.1	0.19699	-0.08204	0.03703	0.48328	0.93071	2.20678	1.62687	-0.1702	-0.77399	0.94091	-3.37937	-0.22746	0.38438																1166.1	0.124335	-0.417458	-0.0389635	0.174455	0.0996556
1168.2	135.268	206.047	212.219	54.6268	22.6841	-160.893	269.426	278.112	586.893	597.245	534.994	564.766	201.474		1168.2	-0.34871	0.36471	0.52565	0.47954	0.20962	0.54191	11.7106	-0.16708	3.25338	-0.05326	5.23421	2.05015	0.01301																1168.2	-0.421365	0.0292924	0.449657	0.170715	-0.621434
1170.3	135.637	206.047	212.316	54.4051	22.4023	-158.82	262.438	277.602	585.887	599.231	527.614	565.333	202.771		1170.3	0.0283	0.36396	0.62598	0.2541	-0.08878	2.60913	4.71262	-0.67366	2.25164	1.93146	-2.1406	2.62676	1.30983																1170.3	-0.0443555	0.0285424	0.549987	-0.0547254	-0.919834
1172.4	135.452	205.6	211.928	54.7376	22.825	-161.308	261.662	279.811	583.875	597.741	530.074	567.601	200.547		1172.4	-0.1483	-0.08429	0.2409	0.58286	0.31733	0.11496	3.92619	1.53806	0.24401	0.44088	0.32369	4.90438	-0.91504																1172.4	-0.220955	-0.419708	0.164907	0.274035	-0.513724
1174.5	135.452	206.271	212.025	54.8484	23.5295	-163.796	260.885	280.32	583.373	595.755	527.614	561.931	201.288		1174.5	-0.1404	0.58615	0.34113	0.68992	1.00524	-2.37931	3.13966	2.05078	-0.25482	-1.54619	-2.13163	-0.75641	-0.17432																1174.5	-0.213055	0.250732	0.265137	0.381095	0.174186
1176.6	134.899	205.152	211.54	54.6268	22.825	-164.211	260.885	278.961	584.881	598.238	533.149	564.766	201.103		1176.6	-0.6862	-0.5332	-0.14104	0.46458	0.28415	-2.80019	3.12963	0.6948	1.25794	0.93503	3.40736	2.0882	-0.36039																1176.6	-0.758855	-0.868618	-0.217033	0.155755	-0.546904
1178.7	135.268	206.271	211.345	55.1808	23.5295	-158.405	256.227	278.112	581.864	599.727	529.459	564.199	201.474		1178.7	-0.3092	0.58465	-0.33192	1.01484	0.97206	2.99914	-1.539	-0.15148	-1.75539	2.42316	-0.27786	1.53072	0.00963																1178.7	-0.381855	0.249232	-0.407913	0.706015	0.141006
1180.8	135.452	205.6	212.025	54.516	22.6841	-164.211	258.556	279.981	583.373	598.734	530.689	563.632	200.917		1180.8	-0.11669	-0.08831	0.35081	0.3463	0.11007	-2.81254	0.78028	1.72044	-0.24262	1.42908	0.95653	0.97323	-0.54704																1180.8	-0.189345	-0.423728	0.274817	0.0374746	-0.720984
1182.9	135.268	204.705	211.928	54.8484	23.3886	-158.405	264.768	277.772	580.355	599.231	533.764	562.498	201.474		1182.9	-0.29339	-0.98751	0.25703	0.67496	0.79798	2.98679	6.98185	-0.48504	-3.25596	1.92441	4.03571	-0.15136	0.00829																1182.9	-0.366045	-1.32293	0.181037	0.366135	-0.0330744
1185	134.899	206.047	211.734	54.0727	22.9659	-160.064	263.215	280.49	579.852	598.238	534.994	564.199	201.474		1185	-0.65459	0.35039	0.06606	-0.10448	0.35869	1.32191	5.41892	2.23628	-3.75479	0.93033	5.2701	1.55925	0.00761																1185	-0.727245	0.0149724	-0.00993347	-0.413305	-0.472364
1187.1	136.006	206.271	211.831	54.2943	23.6704	-158.82	262.438	278.112	584.378	597.245	531.919	559.663	200.547		1187.1	0.46061	0.5697	0.16638	0.11338	1.04659	2.55974	4.63239	-0.139	0.77538	-0.06384	2.19988	-2.96753	-0.91976																1187.1	0.387955	0.234282	0.0903865	-0.195445	0.215536
1189.2	136.191	206.718	211.928	54.6268	22.6841	-162.137	270.203	280.32	582.87	599.231	528.229	561.931	202.03		1189.2	0.65301	1.0127	0.26671	0.44214	0.0437	-0.76384	12.3869	2.07262	-0.72926	1.92088	-1.48523	-0.68982	0.56236																1189.2	0.580355	0.677282	0.190717	0.133315	-0.787354
1191.3	134.899	205.823	212.025	54.4051	22.825	-160.893	263.991	279.471	582.367	598.238	531.919	563.065	202.215		1191.3	-0.63088	0.1135	0.36693	0.2167	0.16801	0.47399	6.16524	1.22634	-1.22809	0.92681	2.20886	0.45369	0.74699																1191.3	-0.703535	-0.221918	0.290937	-0.0921254	-0.663044
1193.4	136.006	206.047	211.637	54.1835	22.9659	-162.552	263.991	278.961	582.87	596.748	538.068	565.333	199.62		1193.4	0.48432	0.3328	-0.01814	-0.00864	0.29232	-1.19088	6.15521	0.71976	-0.72112	-0.56377	8.36264	2.7314	-1.84858																1193.4	0.411665	-0.00261758	-0.0941335	-0.317465	-0.538734
1195.5	135.452	206.942	211.928	54.6268	23.5295	-161.308	263.215	278.451	580.858	596.252	531.304	563.065	202.215		1195.5	-0.06138	1.2233	0.27638	0.43092	0.83933	0.04704	5.36878	0.21318	-2.72865	-1.06144	1.60283	0.47272	0.74564																1195.5	-0.134035	0.887882	0.200387	0.122095	0.00827558
1197.6	135.083	205.376	212.025	54.2943	23.1068	-160.893	258.556	280.49	585.384	597.741	531.304	564.766	201.844		1197.6	-0.42258	-0.3472	0.37853	0.09468	0.40004	0.45547	0.70005	2.255	1.80161	0.42678	1.60731	2.18333	0.37427																1197.6	-0.495235	-0.682618	0.302537	-0.214145	-0.431014
1199.7	135.083	205.6	211.734	54.7376	23.3886	-162.137	257.003	277.942	585.887	599.727	528.844	562.498	202.215		1199.7	-0.41467	-0.1279	0.09255	0.53424	0.66525	-0.79471	-0.86288	-0.29018	2.30858	2.41141	-0.8479	-0.07526	0.74429																1199.7	-0.487325	-0.463318	0.0165565	0.225415	-0.165804
1201.8	135.452	205.823	211.928	54.516	23.5295	-162.137	261.662	278.451	585.384	595.259	532.534	562.498	201.659		1201.8	-0.03767	0.0915	0.29196	0.3089	0.78955	-0.80088	3.7858	0.22254	1.80975	-2.05787	2.84618	-0.06575	0.18762																1201.8	-0.110325	-0.243918	0.215967	7.46316e-05	-0.0415044
1203.9	135.637	205.6	211.734	54.8484	22.9659	-160.893	259.332	278.791	580.355	595.755	536.223	560.23	202.03		1203.9	0.15473	-0.1367	0.10297	0.63756	0.20936	0.43694	1.44637	0.56546	-3.21529	-1.56264	6.54027	-2.32443	0.55765																1203.9	0.0820745	-0.472118	0.0269765	0.328735	-0.621694
1206	135.268	205.152	211.442	54.516	22.1205	-160.893	260.109	278.621	588.905	597.741	533.764	564.199	202.4		1206	-0.20647	-0.5885	-0.18302	0.30142	-0.65263	0.43077	2.21284	0.39868	5.33818	0.42208	4.08505	1.65438	0.92767																1206	-0.279125	-0.923918	-0.259013	-0.00740537	-1.48368
1208.1	135.821	205.823	211.734	54.4051	23.2477	-161.308	263.215	279.981	582.367	595.259	530.074	566.467	201.288		1208.1	0.35503	0.07831	0.11339	0.18678	0.45798	0.01	5.30861	1.761	-1.19555	-2.06139	0.39994	3.93199	-0.1851																1208.1	0.282375	-0.257108	0.0373965	-0.122045	-0.373074
1210.2	135.268	205.376	211.637	54.0727	23.2477	-164.211	259.332	279.981	584.881	599.231	528.229	561.364	199.991		1210.2	-0.19066	-0.37359	0.02151	-0.14936	0.44139	-2.89898	1.41628	1.76412	1.32301	1.90913	-1.44037	-1.1618	-1.48328																1210.2	-0.263315	-0.709008	-0.0544835	-0.458185	-0.389664
1212.3	135.821	206.047	211.442	53.9619	22.5432	-159.235	270.979	278.621	580.355	600.72	532.534	562.498	201.659		1212.3	0.37084	0.29321	-0.16738	-0.25933	-0.2797	2.07095	13.0529	0.40804	-3.19902	3.39736	2.86861	-0.01818	0.18425																1212.3	0.298185	-0.0422076	-0.243373	-0.568155	-1.11075
1214.4	135.821	206.718	211.442	54.4051	22.5432	-165.455	260.109	277.602	584.378	596.252	536.838	564.199	201.103		1214.4	0.37874	0.95991	-0.16217	0.1893	-0.29629	-4.15533	2.17273	-0.60814	0.82825	-1.07202	7.1777	1.69243	-0.37253																1214.4	0.306085	0.624492	-0.238163	-0.119525	-1.12734
1216.5	135.083	205.823	211.637	54.6268	22.9659	-162.967	256.227	277.942	581.864	600.223	534.379	562.498	201.844		1216.5	-0.35146	0.06071	0.03714	0.41642	0.12186	-1.6734	-1.7195	-0.26522	-1.68218	2.89851	4.72238	0.000842599	0.3682																1216.5	-0.424115	-0.274708	-0.0388535	0.107595	-0.709194
1218.6	135.083	204.481	211.734	54.8484	23.2477	-160.064	253.121	279.641	580.355	593.769	536.838	562.498	202.956		1218.6	-0.34355	-1.28609	0.13946	0.64345	0.40899	1.22312	-4.83533	1.4368	-3.18682	-3.55667	7.18667	0.01036	1.47963																1218.6	-0.416205	-1.62151	0.0634665	0.334625	-0.422064
1220.7	135.637	205.823	211.928	54.6268	23.1068	-161.308	258.556	278.961	582.87	596.748	533.149	560.23	201.844		1220.7	0.21795	0.05191	0.33887	0.42728	0.27341	-0.02705	0.58974	0.76032	-0.66825	-0.57904	3.50155	-2.24833	0.36685																1220.7	0.145295	-0.283508	0.262877	0.118455	-0.557644
1222.8	134.899	205.6	211.734	54.516	23.6704	-162.967	258.556	279.641	583.373	596.748	528.229	562.498	200.547		1222.8	-0.51235	-0.17629	0.14988	0.3219	0.84233	-1.69192	0.57971	1.44304	-0.16128	-0.58022	-1.41346	0.02938	-0.93122																1222.8	-0.585005	-0.511708	0.0738865	0.0130746	0.0112756
1224.9	135.452	205.823	211.831	53.8511	22.825	-161.723	267.097	277.602	581.361	595.259	529.459	560.23	202.03		1224.9	0.04925	0.04311	0.25219	-0.33757	0.00225	-0.4541	9.11059	-0.59254	-2.16882	-2.07079	-0.17917	-2.22931	0.5509																1224.9	-0.0234055	-0.292308	0.176197	-0.646395	-0.828804
1227	135.083	205.6	211.831	54.4051	23.1068	-162.552	261.662	278.451	580.355	597.741	531.304	561.931	201.844		1227	-0.31195	-0.18508	0.25741	0.22185	0.28938	-1.28967	3.66546	0.25998	-3.17055	0.41033	1.67011	-0.51859	0.36483																1227	-0.384605	-0.520498	0.181417	-0.0869754	-0.541674
1229.1	134.899	205.6	211.928	54.7376	23.2477	-164.211	252.344	276.922	585.384	599.727	527	557.962	203.512		1229.1	-0.48864	-0.18948	0.35972	0.55978	0.4356	-2.95455	-5.66197	-1.26589	1.86262	2.39495	-2.6299	-4.47838	2.03226																1229.1	-0.561295	-0.524898	0.283727	0.250955	-0.395454
1231.2	135.637	205.6	211.345	54.516	23.5295	-161.308	252.344	278.961	581.361	597.245	528.844	561.931	201.288		1231.2	0.25746	-0.19388	-0.21757	0.3436	0.72272	-0.05792	-5.672	0.77593	-2.15662	-0.08852	-0.78062	-0.49957	-0.19252																1231.2	0.184805	-0.529298	-0.293563	0.0347746	-0.108334
1233.3	136.56	206.942	211.637	53.7403	23.8113	-158.405	258.556	278.961	582.367	599.727	528.844	560.797	201.659		1233.3	1.18806	1.14412	0.07884	-0.42667	1.00984	2.8386	0.52957	0.77905	-1.14675	2.3926	-0.77613	-1.62416	0.17751																1233.3	1.1154	0.808702	0.00284653	-0.735495	0.178786
1235.4	135.268	206.271	211.54	54.4051	23.2477	-162.967	253.121	277.942	583.875	598.734	534.379	563.065	200.917		1235.4	-0.09584	0.46852	-0.01305	0.24355	0.45156	-1.72897	-4.91555	-0.23713	0.36602	1.39853	4.76275	0.65346	-0.56457																1235.4	-0.168495	0.133102	-0.0890435	-0.0652754	-0.379494
1237.5	134.899	206.271	211.928	53.8511	23.6704	-163.381	263.991	278.112	584.881	600.72	536.223	560.23	201.103		1237.5	-0.45703	0.46412	0.38057	-0.30502	0.87959	-2.14984	5.94462	-0.06411	1.37588	3.38325	6.61204	-2.17223	-0.37994																1237.5	-0.529685	0.128702	0.304577	-0.613845	0.0485356
1239.6	136.006	205.376	211.928	54.1835	23.2477	-157.576	254.674	279.471	583.373	597.245	536.223	562.498	200.732		1239.6	0.65817	-0.43518	0.38578	0.0328	0.46221	3.64938	-3.38271	1.29811	-0.12875	-0.09322	6.61652	0.10548	-0.75132																1239.6	0.585515	-0.770598	0.309787	-0.276025	-0.368844
1241.7	136.006	206.047	211.734	54.6268	23.1068	-160.893	258.556	280.15	580.355	596.748	528.844	561.364	201.844		1241.7	0.66607	0.23162	0.19679	0.48153	0.32663	0.32581	0.48946	1.98083	-3.14208	-0.5908	-0.75819	-1.01911	0.36011																1241.7	0.593415	-0.103798	0.120797	0.172705	-0.504424
1243.8	135.637	205.376	211.54	54.2943	23.3886	-161.308	263.215	278.451	582.87	596.748	534.379	563.632	201.659		1243.8	0.30487	-0.44398	0.0078	0.15446	0.61375	-0.09497	5.13813	0.28495	-0.62351	-0.59197	4.7807	1.25861	0.17414																1243.8	0.232215	-0.779398	-0.0681935	-0.154365	-0.217304
1245.9	135.637	204.481	211.831	54.1835	22.825	-159.649	265.544	278.791	581.864	597.245	531.919	567.601	200.732		1245.9	0.31277	-1.34327	0.30432	0.04908	0.05547	1.55746	7.4574	0.62787	-1.62525	-0.09675	2.32548	5.23732	-0.75334																1245.9	0.240115	-1.67869	0.228327	-0.259745	-0.775584
1248	135.637	206.271	211.151	54.4051	23.5295	-160.479	258.556	279.131	580.858	596.252	531.304	560.797	202.586		1248	0.32068	0.44213	-0.37007	0.27611	0.7653	0.72198	0.45938	0.97079	-2.62698	-1.09082	1.71497	-1.55757	1.09949																1248	0.248025	0.106712	-0.446063	-0.0327154	-0.0657544
1250.1	134.714	206.718	211.151	53.9619	22.825	-162.552	260.109	278.791	581.361	597.741	533.764	563.632	202.586		1250.1	-0.59412	0.88513	-0.36486	-0.16167	0.06612	-1.35759	2.00225	0.63411	-2.12001	0.3974	4.17925	1.28714	1.09881																1250.1	-0.666775	0.549712	-0.440853	-0.470495	-0.764934
1252.2	135.452	206.942	211.831	54.0727	23.2477	-160.479	261.662	279.131	583.875	597.741	530.074	565.333	200.547		1252.2	0.15198	1.10453	0.31995	-0.04544	0.49414	0.70963	3.54512	0.97703	0.39855	0.39623	0.49414	2.99776	-0.94066																1252.2	0.0793245	0.769112	0.243957	-0.354265	-0.336914
1254.3	135.452	205.152	211.734	53.5187	22.825	-160.064	263.215	278.621	584.378	596.748	530.689	564.766	201.659		1254.3	0.15988	-0.68967	0.22806	-0.59402	0.07676	1.11816	5.08799	0.47045	0.90552	-0.59785	1.11352	2.44017	0.17077																1254.3	0.0872245	-1.02509	0.152067	-0.902845	-0.754294
1256.4	135.821	206.495	211.442	54.516	23.1068	-160.893	258.556	279.131	581.864	601.216	530.689	564.766	201.844		1256.4	0.53679	0.64823	-0.05792	0.40871	0.36388	0.28259	0.41926	0.98327	-1.60491	3.86908	1.11801	2.44968	0.35539																1256.4	0.464135	0.312812	-0.133913	0.0998846	-0.467174
1258.5	134.899	206.047	211.637	53.9619	23.1068	-161.308	263.991	278.961	582.367	598.238	531.919	565.333	201.659		1258.5	-0.37801	0.19643	0.14139	-0.13997	0.36921	-0.13819	5.84434	0.81649	-1.09795	0.8892	2.3524	3.02629	0.16942																1258.5	-0.450665	-0.138988	0.0653965	-0.448795	-0.461844
1260.6	135.268	205.823	211.54	53.8511	22.9659	-162.137	262.438	278.791	587.899	601.216	531.919	560.797	201.659		1260.6	-0.00101	-0.03167	0.0495	-0.24534	0.23363	-0.97376	4.28141	0.64971	4.43812	3.86673	2.35688	-1.50049	0.16874																1260.6	-0.0736655	-0.367088	-0.0264935	-0.554165	-0.597424
1262.7	135.268	206.495	211.151	54.1835	22.2614	-161.723	260.885	279.981	579.852	599.727	530.689	563.065	201.844		1262.7	0.00689	0.63503	-0.33359	0.09248	-0.46555	-0.56524	2.71848	1.84213	-3.60431	2.37615	1.13147	0.77712	0.35337																1262.7	-0.0657655	0.299612	-0.409583	-0.216345	-1.2966
1264.8	135.268	205.376	211.442	53.9619	22.4023	-160.064	265.544	277.772	583.875	597.245	528.229	563.632	202.771		1264.8	0.01479	-0.48797	-0.03707	-0.12369	-0.31933	1.08729	7.36715	-0.36335	0.42295	-0.10732	-1.32375	1.35373	1.27949																1264.8	-0.0578655	-0.823388	-0.113063	-0.432515	-1.15038
1266.9	135.268	206.047	211.345	53.9619	22.6841	-164.625	263.215	277.092	584.378	600.223	524.54	565.333	200.547		1266.9	0.0227	0.17884	-0.12896	-0.11827	-0.0322	-3.48029	5.02782	-1.03983	0.92992	2.8703	-5.00886	3.06435	-0.94538																1266.9	-0.0499555	-0.156578	-0.204953	-0.427095	-0.863254
1269	134.899	206.495	211.637	53.5187	22.6841	-161.723	259.332	278.451	584.378	600.72	530.689	561.364	202.4		1269	-0.3385	0.62184	0.16745	-0.55604	-0.02688	-0.58376	1.1355	0.32239	0.93399	3.36563	1.14492	-0.89544	0.90745																1269	-0.411155	0.286422	0.0914565	-0.864865	-0.857934
1271.1	134.714	206.271	211.928	53.8511	23.1068	-162.137	258.556	278.621	582.367	597.245	531.919	565.333	204.068		1271.1	-0.5151	0.39374	0.46396	-0.21821	0.40114	-1.00463	0.34907	0.49541	-1.07354	-0.11085	2.37931	3.08337	2.57487																1271.1	-0.587755	0.0583224	0.387967	-0.527035	-0.429914
1273.2	135.637	206.495	210.569	54.516	23.6704	-160.893	257.78	278.282	583.373	595.755	530.074	565.9	201.288		1273.2	0.4155	0.61304	-0.89002	0.45211	0.97006	0.23319	-0.43736	0.15883	-0.06368	-1.60142	0.53899	3.65988	-0.206																1273.2	0.342845	0.277622	-0.966013	0.143285	0.139006
1275.3	135.083	204.929	211.734	53.6295	22.6841	-162.137	265.544	278.961	583.373	600.223	526.385	563.065	200.361		1275.3	-0.13019	-0.95736	0.28019	-0.42896	-0.01092	-1.01698	7.31701	0.84145	-0.05961	2.8656	-3.14612	0.8342	-1.13348																1275.3	-0.202845	-1.29278	0.204197	-0.737785	-0.841974
1277.4	135.083	206.271	210.763	54.0727	22.825	-159.235	263.991	278.791	583.875	590.791	529.459	562.498	203.883		1277.4	-0.12229	0.38054	-0.6854	0.01966	0.13531	1.87954	5.75408	0.67467	0.44736	-6.56837	-0.06703	0.27671	2.38745																1277.4	-0.194945	0.0451224	-0.761393	-0.289165	-0.695744
1279.5	134.345	206.271	211.151	54.0727	23.3886	-160.893	257.78	278.791	581.864	597.741	533.764	560.23	201.844		1279.5	-0.85259	0.37614	-0.29189	0.02509	0.70423	0.21467	-0.46745	0.67779	-1.56018	0.38095	4.24205	-1.98198	0.34798																1279.5	-0.925245	0.0407224	-0.367883	-0.283735	-0.126824
1281.6	134.899	205.823	211.345	54.6268	23.5295	-161.308	263.991	279.641	585.384	596.748	530.074	564.766	200.547		1281.6	-0.29109	-0.07566	-0.09248	0.58461	0.85045	-0.20611	5.73403	1.53041	1.96429	-0.61313	0.55694	2.56383	-0.9501																1281.6	-0.363745	-0.411078	-0.168473	0.275785	0.0193956
1283.7	134.53	206.495	211.248	53.8511	23.5295	-162.137	258.556	278.961	584.881	599.231	532.534	560.23	202.586		1283.7	-0.65219	0.59104	-0.18436	-0.18566	0.85577	-1.04168	0.2889	0.85393	1.46536	1.868	3.02112	-1.96295	1.08803																1283.7	-0.724845	0.255622	-0.260353	-0.494485	0.0247156
1285.8	135.083	206.718	211.345	54.1835	23.1068	-160.064	265.544	279.131	583.875	596.748	528.844	563.632	202.956		1285.8	-0.09068	0.81035	-0.08205	0.15216	0.43839	1.02555	7.26687	1.02695	0.46362	-0.61548	-0.66399	1.44886	1.45805																1285.8	-0.163335	0.474932	-0.158043	-0.156665	-0.392664
1287.9	134.714	205.376	210.957	53.8511	22.9659	-160.479	262.438	279.301	583.373	597.245	528.229	565.333	201.474		1287.9	-0.45188	-0.53635	-0.46524	-0.17481	0.30282	0.60467	4.15104	1.19997	-0.03521	-0.12025	-1.27441	3.15947	-0.02542																1287.9	-0.524535	-0.871768	-0.541233	-0.483635	-0.528234
1290	135.268	206.047	211.442	54.0727	23.3886	-160.064	262.438	279.471	585.887	598.238	533.764	564.199	201.844		1290	0.10962	0.13045	0.02547	0.05221	0.73084	1.0132	4.14101	1.37299	2.48346	0.87157	4.26448	2.03488	0.34461																1290	0.0369645	-0.204968	-0.0505235	-0.256615	-0.100214
1292.1	134.345	206.942	211.248	53.8511	23.3886	-163.381	260.885	279.301	584.378	590.294	534.379	567.601	201.844		1292.1	-0.80518	1.02095	-0.16351	-0.16396	0.73616	-2.31038	2.57809	1.20621	0.97873	-7.073	4.88386	5.4466	0.34393																1292.1	-0.877835	0.685532	-0.239503	-0.472785	-0.0948944
1294.2	135.821	206.942	211.734	53.6295	23.5295	-163.796	260.109	278.112	586.893	597.741	524.54	565.9	201.103		1294.2	0.67903	1.01655	0.3271	-0.38013	0.88238	-2.73125	1.79166	0.02013	3.49739	0.37272	-4.95055	3.75501	-0.39814																1294.2	0.606375	0.681132	0.251107	-0.688955	0.0513256
1296.3	135.083	206.271	211.248	53.9619	23.3886	-160.893	260.109	277.942	583.875	595.755	534.379	565.9	202.03		1296.3	-0.05117	0.34095	-0.15309	-0.04231	0.7468	0.16527	1.78163	-0.14665	0.48396	-1.61435	4.89284	3.76452	0.52798																1296.3	-0.123825	0.00553242	-0.229083	-0.351135	-0.0842544
1298.4	135.637	205.823	211.054	54.1835	22.6841	-162.137	257.78	278.961	581.361	595.259	525.77	558.529	202.586		1298.4	0.51033	-0.11085	-0.34208	0.18472	0.04763	-1.0849	-0.5577	0.87577	-2.02647	-2.11193	-3.71178	-3.59747	1.08331																1298.4	0.437675	-0.446268	-0.418073	-0.124105	-0.783424
1300.5	135.452	206.047	211.734	54.0727	23.2477	-159.649	257.78	277.602	582.87	596.252	531.919	560.797	202.956		1300.5	0.33373	0.10845	0.34274	0.07934	0.61655	1.39693	-0.56773	-0.48021	-0.51371	-1.1202	2.44211	-1.31975	1.45333																1300.5	0.261075	-0.226968	0.266747	-0.229485	-0.214504
1302.6	135.452	205.823	212.025	53.8511	23.2477	-157.576	268.65	278.451	583.875	598.734	524.54	564.199	202.4		1302.6	0.34163	-0.11965	0.63915	-0.13683	0.62187	3.46415	10.2924	0.37231	0.49616	1.36092	-4.93261	2.09196	0.89666																1302.6	0.268975	-0.455068	0.563157	-0.445655	-0.209184
1304.7	134.899	206.718	211.54	54.0727	23.2477	-162.137	263.215	278.112	584.881	593.769	531.919	558.529	202.4		1304.7	-0.20416	0.77076	0.15896	0.09019	0.62719	-1.10342	4.84732	0.03573	1.50603	-3.60485	2.45108	-3.56893	0.89599																1304.7	-0.276815	0.435342	0.0829665	-0.218635	-0.203864
1306.8	134.345	206.495	211.151	54.2943	23.3886	-161.723	257.78	278.621	582.367	599.727	531.304	560.23	201.103		1306.8	-0.74986	0.54266	-0.22413	0.31722	0.77342	-0.6949	-0.59781	0.54845	-1.00441	2.35147	1.84056	-1.85831	-0.40219																1306.8	-0.822515	0.207242	-0.300123	0.00839463	-0.0576344
1308.9	134.899	205.823	211.248	54.4051	23.5295	-163.381	257.78	278.451	578.343	597.245	530.074	560.797	201.659		1308.9	-0.18836	-0.13284	-0.12182	0.43344	0.91964	-2.35977	-0.60784	0.38167	-5.02364	-0.132	0.61525	-1.2817	0.15324																1308.9	-0.261015	-0.468258	-0.197813	0.124615	0.0885856
1311	135.268	205.6	211.637	53.6295	23.1068	-159.649	264.768	279.131	588.905	599.231	531.304	559.663	202.215		1311	0.18864	-0.36104	0.2717	-0.33673	0.50226	1.36605	6.37013	1.06439	5.54153	1.85272	1.84954	-2.40629	0.70856																1311	0.115985	-0.696458	0.195707	-0.645555	-0.328794
1313.1	134.714	206.047	211.637	54.4051	22.6841	-162.552	257.78	278.451	583.875	592.777	528.229	562.498	202.4		1313.1	-0.35705	0.08206	0.27691	0.44429	0.08488	-1.54282	-0.6279	0.38791	0.51649	-4.60245	-1.22058	0.43842	0.89329																1313.1	-0.429705	-0.253358	0.200917	0.135465	-0.746174
1315.2	135.637	205.152	211.442	54.0727	23.2477	-160.479	257.003	278.282	586.39	595.755	527.614	566.467	202.215		1315.2	0.57355	-0.81724	0.08802	0.11732	0.6538	0.5244	-1.41442	0.22123	3.03516	-1.62493	-1.83109	4.41714	0.70722																1315.2	0.500895	-1.15266	0.0120265	-0.191505	-0.177254
1317.3	135.637	206.495	211.54	54.1835	23.6704	-163.381	258.556	278.451	584.378	596.252	527	560.23	202.03		1317.3	0.58145	0.52066	0.19023	0.23355	1.08183	-2.38447	0.12845	0.39415	1.02753	-1.1296	-2.44151	-1.81075	0.52124																1317.3	0.508795	0.185242	0.114237	-0.0752754	0.250776
1319.4	135.821	206.495	210.957	54.2943	22.6841	-161.308	258.556	278.451	583.373	597.741	525.77	554.559	200.176		1319.4	0.77385	0.51626	-0.38705	0.34977	0.10085	-0.31724	0.11842	0.39727	0.0258	0.35862	-3.66692	-7.47154	-1.33293																1319.4	0.701195	0.180842	-0.463043	0.0409446	-0.730204
1321.5	135.083	206.718	211.345	53.9619	23.3886	-158.82	260.885	278.282	580.858	594.266	536.223	566.467	202.03		1321.5	0.04365	0.73556	0.00656	0.0228	0.81067	2.16458	2.43769	0.23059	-2.48464	-3.11775	6.79146	4.44567	0.51989																1321.5	-0.0290055	0.400142	-0.0694335	-0.286025	-0.0203844
1323.6	135.452	206.047	211.637	54.1835	22.9659	-164.211	263.215	279.301	580.858	595.259	527.614	566.467	200.917		1323.6	0.42066	0.06006	0.30297	0.24982	0.39329	-3.23239	4.75706	1.25301	-2.48057	-2.12603	-1.81315	4.45519	-0.59288																1323.6	0.348005	-0.275358	0.226977	-0.0590054	-0.437764
1325.7	135.452	205.152	211.734	53.6295	22.6841	-160.893	254.674	277.942	583.875	597.245	526.385	560.797	201.288		1325.7	0.42856	-0.83923	0.40528	-0.29875	0.11681	0.07883	-3.79386	-0.10297	0.5409	-0.1414	-3.03847	-1.2056	-0.22286																1325.7	0.355905	-1.17465	0.329287	-0.607575	-0.714244
1327.8	134.899	204.929	211.248	54.7376	22.4023	-157.576	257.003	278.621	582.87	595.259	532.534	559.663	201.844		1327.8	-0.11724	-1.06733	-0.07491	0.81477	-0.15966	3.39006	-1.47459	0.57965	-0.46084	-2.12838	3.11532	-2.33019	0.33247																1327.8	-0.189895	-1.40275	-0.150903	0.505945	-0.990714
1329.9	134.345	206.495	211.248	54.1835	22.9659	-158.82	254.674	278.282	581.864	597.741	532.534	564.199	200.917		1329.9	-0.66294	0.49427	-0.06969	0.2661	0.40926	2.13988	-3.81392	0.24307	-1.46257	0.35275	3.11981	2.21562	-0.5949																1329.9	-0.735595	0.158852	-0.145683	-0.0427254	-0.421794
1332	134.899	206.047	211.151	53.1863	22.825	-161.723	250.792	278.621	587.396	601.216	530.074	559.096	202.586		1332	-0.10143	0.04247	-0.16158	-0.72568	0.27368	-0.76899	-7.70615	0.5859	4.0735	3.82677	0.66459	-2.87816	1.07252																1332	-0.174085	-0.292948	-0.237573	-1.03451	-0.557374
1334.1	135.452	206.047	211.054	54.1835	22.9659	-161.723	259.332	278.112	583.373	601.713	528.229	563.065	202.586		1334.1	0.46017	0.03807	-0.25347	0.27695	0.4199	-0.77516	0.82462	0.07942	0.05426	4.3221	-1.17572	1.10055	1.07185																1334.1	0.387515	-0.297348	-0.329463	-0.0318754	-0.411154
1336.2	135.268	205.152	210.763	54.516	23.1068	-163.796	257.78	277.602	582.87	598.238	529.459	560.23	200.732		1336.2	0.28347	-0.86123	-0.53946	0.61487	0.56613	-2.85474	-0.73821	-0.42716	-0.44457	0.84572	0.05856	-1.72514	-0.78233																1336.2	0.210815	-1.19665	-0.615453	0.306045	-0.264924
1338.3	135.083	206.718	211.928	53.8511	22.2614	-160.064	262.438	277.432	587.396	602.209	531.304	563.632	199.805		1338.3	0.10687	0.70037	0.63076	-0.0446	-0.27395	0.87119	3.91037	-0.59394	4.0857	4.81624	1.90785	1.68667	-1.7097																1338.3	0.0342145	0.364952	0.554767	-0.353425	-1.105
1340.4	135.083	206.047	211.54	53.8511	22.4023	-158.405	260.885	278.451	581.864	597.245	527	561.364	202.4		1340.4	0.11477	0.02487	0.24757	-0.03917	-0.12773	2.52371	2.34744	0.42848	-1.44224	-0.14963	-2.39217	-0.57201	0.88453																1340.4	0.0421145	-0.310548	0.171577	-0.347995	-0.958784
1342.5	135.083	206.047	211.345	54.4051	22.2614	-158.82	260.885	278.282	579.852	597.741	527.614	559.096	201.659		1342.5	0.12268	0.02047	0.05868	0.52025	-0.26331	2.10284	2.33741	0.2618	-3.44977	0.34569	-1.77278	-2.8306	0.14245																1342.5	0.0500245	-0.314948	-0.0173135	0.211425	-1.09436
1344.6	135.637	206.942	211.637	53.9619	21.557	-159.235	256.227	278.282	581.361	601.713	527.614	559.096	202.03		1344.6	0.68418	0.91098	0.35509	0.08248	-0.96239	1.68196	-2.33122	0.26492	-1.937	4.31622	-1.76829	-2.82109	0.51248																1344.6	0.611525	0.575562	0.279097	-0.226345	-1.79344
1346.7	135.083	206.718	211.054	53.6295	22.6841	-162.137	259.332	278.961	583.875	599.231	531.304	560.23	202.4		1346.7	0.13848	0.68278	-0.22219	-0.2445	0.17004	-1.22691	0.76445	0.94754	0.58157	1.83274	1.92579	-1.67758	0.8825																1346.7	0.0658245	0.347362	-0.298183	-0.553325	-0.661014
1348.8	136.006	206.718	211.442	54.0727	22.4023	-160.064	262.438	279.641	582.367	598.734	528.844	561.364	202.215		1348.8	1.06908	0.67838	0.17142	0.20413	-0.10644	0.84032	3.86023	1.63026	-0.92307	1.33507	-0.52942	-0.53396	0.69643																1348.8	0.996425	0.342962	0.0954265	-0.104695	-0.937494
1350.9	136.006	205.823	210.957	53.6295	22.825	-162.137	268.65	277.432	582.87	596.748	533.149	563.632	202.956		1350.9	1.07698	-0.22082	-0.30887	-0.23365	0.32158	-1.23926	10.0618	-0.57522	-0.4161	-0.65191	3.77966	1.74375	1.43715																1350.9	1.00432	-0.556238	-0.384863	-0.542475	-0.509474
1353	135.821	205.823	211.054	53.6295	22.6841	-162.137	261.662	278.621	581.361	597.245	531.304	563.065	201.659		1353	0.90029	-0.22522	-0.20656	-0.22822	0.186	-1.24543	3.06377	0.6171	-1.92073	-0.15668	1.93925	1.18616	0.13908																1353	0.827635	-0.560638	-0.282553	-0.537045	-0.645054
1355.1	135.637	206.718	210.569	53.4079	22.4023	-161.308	266.32	279.471	587.396	596.252	531.304	561.931	201.103		1355.1	0.72369	0.66518	-0.68675	-0.4444	-0.09048	-0.42221	7.71244	1.46972	4.11823	-1.15076	1.94373	0.06168	-0.41769																1355.1	0.651035	0.329762	-0.762743	-0.753225	-0.921534
1357.2	135.083	206.047	211.054	53.8511	22.4023	-160.479	264.768	277.942	577.841	593.769	531.304	567.601	201.844		1357.2	0.17799	-0.01032	-0.19613	0.00423	-0.08515	0.40092	6.14951	-0.05616	-5.433	-3.63423	1.94822	5.74149	0.32303																1357.2	0.105335	-0.345738	-0.272123	-0.304595	-0.916204
1359.3	134.714	205.823	211.248	53.7403	22.1205	-159.649	257.78	277.262	581.864	598.734	530.689	561.364	200.361		1359.3	-0.18321	-0.23842	0.00328	-0.10115	-0.36163	1.22404	-0.84851	-0.73264	-1.40563	1.32919	1.3378	-0.4864	-1.16044																1359.3	-0.255865	-0.573838	-0.0727135	-0.409975	-1.19268
1361.4	134.714	205.6	211.151	54.516	21.9796	-162.552	266.32	276.922	584.378	600.223	526.385	561.931	202.03		1361.4	-0.1753	-0.46662	-0.08861	0.67998	-0.49721	-1.68483	7.68236	-1.06932	1.11293	2.81742	-2.96221	0.09021	0.50708																1361.4	-0.247955	-0.802038	-0.164603	0.371155	-1.32826
1363.5	135.268	206.271	211.345	54.0727	22.9659	-159.649	266.32	277.262	581.864	595.755	532.534	563.632	202.4		1363.5	0.3862	0.20019	0.1108	0.2421	0.49441	1.2117	7.67233	-0.7264	-1.3975	-1.65196	3.19158	1.80083	0.87711																1363.5	0.313545	-0.135228	0.0348065	-0.0667254	-0.336644
1365.6	135.083	205.823	210.957	53.4079	22.825	-161.308	258.556	278.621	586.893	594.762	533.149	558.529	202.586		1365.6	0.2096	-0.25161	-0.27238	-0.41727	0.35883	-0.45308	-0.1022	0.63582	3.63567	-2.64603	3.81106	-3.29306	1.06174																1365.6	0.136945	-0.587028	-0.348373	-0.726095	-0.472224
1367.7	134.53	206.718	211.248	53.8511	23.1068	-160.893	261.662	276.243	578.343	599.727	530.689	564.766	201.103		1367.7	-0.3361	0.63879	0.02413	0.03136	0.64596	-0.04465	2.99357	-1.73946	-4.90977	2.31739	1.35575	2.95385	-0.42174																1367.7	-0.408755	0.303372	-0.0518635	-0.277465	-0.185094
1369.8	135.083	206.271	211.442	54.1835	22.6841	-160.479	261.662	276.922	585.887	595.755	528.844	554.559	200.917		1369.8	0.2254	0.18699	0.22354	0.36918	0.22858	0.36387	2.98354	-1.05684	2.638	-1.65548	-0.48457	-7.24324	-0.60771																1369.8	0.152745	-0.148428	0.147547	0.0603546	-0.602474
1371.9	134.714	206.495	211.151	54.2943	23.2477	-160.064	260.109	278.621	580.355	599.727	533.149	563.065	202.4		1371.9	-0.13579	0.40629	-0.06255	0.48541	0.7975	0.7724	1.42062	0.64518	-2.88993	2.31504	3.82452	1.27178	0.87441																1371.9	-0.208445	0.0708724	-0.138543	0.176585	-0.0335544
1374	134.899	206.718	211.54	53.7403	22.4023	-162.552	253.121	278.112	584.378	599.231	528.844	560.23	202.4		1374	0.05661	0.62559	0.33096	-0.06317	-0.04258	-1.72188	-5.57741	0.1387	1.13734	1.81747	-0.4756	-1.55391	0.87374																1374	-0.0160455	0.290172	0.254967	-0.371995	-0.873634
1376.1	135.268	206.495	211.345	53.5187	21.8388	-157.576	256.227	278.621	582.87	601.713	530.689	562.498	202.215		1376.1	0.43361	0.39749	0.14208	-0.27934	-0.60075	3.24805	-2.48164	0.65142	-0.3673	4.29859	1.37369	0.7238	0.68767																1376.1	0.360955	0.0620724	0.0660865	-0.588165	-1.4318
1378.2	134.53	206.047	211.54	54.2943	22.825	-160.064	263.215	277.432	584.881	596.748	529.459	565.9	201.844		1378.2	-0.29659	-0.05431	0.34139	0.50168	0.39077	0.75387	4.49633	-0.53466	1.64837	-0.66718	0.14827	4.13551	0.31629																1378.2	-0.369245	-0.389728	0.265397	0.192855	-0.440284
1380.3	135.083	205.823	211.734	53.5187	22.6841	-157.991	264.768	277.772	585.384	598.734	528.844	565.9	200.917		1380.3	0.26492	-0.28241	0.5408	-0.26849	0.25519	2.821	6.0392	-0.19174	2.15544	1.31744	-0.46214	4.14503	-0.61108																1380.3	0.192265	-0.617828	0.464807	-0.577315	-0.575864
1382.4	135.452	205.6	211.054	53.5187	22.9659	-160.479	263.991	277.772	582.87	600.223	530.074	564.199	201.844		1382.4	0.64192	-0.51061	-0.13359	-0.26307	0.54231	0.32683	5.25268	-0.18862	-0.3551	2.80567	0.77225	2.45344	0.31494																1382.4	0.569265	-0.846028	-0.209583	-0.571895	-0.288744
1384.5	135.083	205.152	211.248	53.9619	22.5432	-159.235	261.662	278.621	583.373	594.266	527.614	559.663	201.103		1384.5	0.28072	-0.9624	0.06583	0.18556	0.12493	1.56465	2.91335	0.6639	0.15187	-3.15301	-1.68307	-2.07335	-0.42713																1384.5	0.208065	-1.29782	-0.0101635	-0.123265	-0.706124
1386.6	134.714	206.718	210.86	53.9619	23.1068	-160.064	253.121	279.301	584.881	598.734	531.304	564.199	202.956		1386.6	-0.08048	0.5992	-0.31726	0.19098	0.69386	0.72918	-5.63758	1.34662	1.66464	1.31392	2.01102	2.47246	1.42569																1386.6	-0.153135	0.263782	-0.393253	-0.117845	-0.137194
1388.7	134.161	206.942	210.763	53.5187	22.9659	-164.625	256.227	278.961	583.373	597.245	530.074	561.931	202.956		1388.7	-0.62618	0.8186	-0.40915	-0.24679	0.55828	-3.8384	-2.54181	1.00994	0.16	-0.17666	0.7857	0.21388	1.42502																1388.7	-0.698835	0.483182	-0.485143	-0.555615	-0.272774
1390.8	135.083	206.047	211.637	53.9619	22.4023	-160.064	260.885	278.451	579.852	600.223	525.155	559.096	201.844		1390.8	0.30443	-0.0807	0.46976	0.20184	0	0.71683	2.10676	0.50336	-3.35623	2.80096	-4.12931	-2.61181	0.31225																1390.8	0.231775	-0.416118	0.393767	-0.106985	-0.831054
1392.9	134.345	205.823	211.442	54.0727	22.6841	-156.747	263.215	277.772	584.881	598.238	531.919	561.931	201.288		1392.9	-0.42587	-0.3088	0.28088	0.31806	0.28712	4.02805	4.42614	-0.17302	1.67684	0.81399	2.63947	0.2329	-0.24443																1392.9	-0.498525	-0.644218	0.204887	0.00923463	-0.543934
1395	135.268	205.376	211.345	53.4079	23.1068	-157.576	265.544	278.621	578.846	597.245	531.304	560.797	202.4		1395	0.50473	-0.7607	0.18899	-0.34131	0.71514	3.19248	6.74541	0.6795	-4.35389	-0.18019	2.02896	-0.89168	0.867																1395	0.432075	-1.09612	0.112997	-0.650135	-0.115914
1397.1	134.899	206.047	211.151	53.2971	22.6841	-162.137	263.215	276.243	587.396	593.273	528.844	562.498	201.103		1397.1	0.14353	-0.0939	0	-0.44669	0.29777	-1.37509	4.40608	-1.69578	4.19957	-4.15306	-0.42625	0.81893	-0.43118																1397.1	0.0708745	-0.429318	-0.0759935	-0.755515	-0.533284
[truncated: 40 more columns]

## Sheet: Fig4A Acetabularia
		Original data (P515 deltaI/I x10³)							After slope correction in Origin (baseline subtraction tool)									Zero levels							Zero levels set							Maximum at onset of light pulse									Normalized to maximum						Averaged data (shown in Fig. 4A)
Time (ms)	Acetabularia 1	Acetabularia 2	Acetabularia 3	Acetabularia 4	Acetabularia 5	Acetabularia 6		Time (ms)	Acetabularia 1	Acetabularia 2	Acetabularia 3	Acetabularia 4	Acetabularia 5	Acetabularia 6		Acetabularia 1	Acetabularia 2	Acetabularia 3	Acetabularia 4	Acetabularia 5	Acetabularia 6		Time (ms)	Acetabularia 1	Acetabularia 2	Acetabularia 3	Acetabularia 4	Acetabularia 5	Acetabularia 6		Acetabularia 1	Acetabularia 2	Acetabularia 3	Acetabularia 4	Acetabularia 5	Acetabularia 6		Time (ms)	Acetabularia 1	Acetabularia 2	Acetabularia 3	Acetabularia 4	Acetabularia 5	Acetabularia 6		Time (ms)	Average Acetab ECS	stdev	SE
-198.9	132.316	159.039	20.1613	143.928	53.3655	-44.2298		-198.9	-0.11685	0.05925	-0.09935	0	0	0		0.0254099	0.0602912	0.0384183	0.116295	-0.0427052	0.0337512		-198.9	-0.14226	-0.00104118	-0.137768	-0.116295	0.0427052	-0.0337512		10.9415	8.91343	9.11374	11.3847	9.80307	10.1067		-198.9	-0.0130019	-0.000116811	-0.0151165	-0.010215	0.00435631	-0.00333947		-198.9	-0.00623891	0.00772665	0.00315439
-196.8	132.428	158.979	20.2796	144.144	53.3425	-44.1994		-196.8	-0.00394	-0.000230471	0.02053	0.21795	-0.02187	0.0299									-196.8	-0.0293499	-0.0605217	-0.0178883	0.101655	0.0208352	-0.00385116									-196.8	-0.00268245	-0.00678994	-0.00196278	0.00892906	0.00212538	-0.000381048		-196.8	-0.000126964	0.00531874	0.00217137
-194.7	132.428	158.949	20.3033	144.09	53.2507	-44.1079		-194.7	-0.00262	-0.02992	0.04582	0.16531	-0.11254	0.1209									-194.7	-0.0280299	-0.0902112	0.00740168	0.0490148	-0.0698348	0.0871488									-194.7	-0.00256181	-0.0101208	0.000812145	0.00430532	-0.00712377	0.00862284		-194.7	-0.00101101	0.00703075	0.00287029
-192.6	132.428	158.979	20.2559	144.253	53.2736	-44.047		-192.6	-0.00131	0	0	0.32916	-0.08851	0.1813									-192.6	-0.0267199	-0.0602912	-0.0384183	0.212865	-0.0458048	0.147549									-192.6	-0.00244208	-0.00676408	-0.00421543	0.0186974	-0.00467249	0.014599		-192.6	0.00253373	0.0110953	0.00452963
-190.5	132.428	159.158	20.1613	144.415	53.2047	-44.2298		-190.5	0	0.17892	-0.09302	0.49302	-0.15629	-0.002									-190.5	-0.0254099	0.118629	-0.131438	0.376725	-0.113585	-0.0357512									-190.5	-0.00232235	0.013309	-0.014422	0.0330904	-0.0115867	-0.00353735		-190.5	0.00242184	0.0178721	0.00729626
-188.4	132.344	159.098	20.1376	144.253	53.2736	-44.2603		-188.4	-0.08239	0.11943	-0.11513	0.33207	-0.08626	-0.033									-188.4	-0.1078	0.0591388	-0.153548	0.215775	-0.0435548	-0.0667512									-188.4	-0.00985243	0.0066348	-0.016848	0.018953	-0.00444297	-0.00660461		-188.4	-0.0020267	0.0128287	0.0052373
-186.3	132.316	159.188	20.1849	144.199	53.3655	-44.2908		-186.3	-0.10898	0.20895	-0.06625	0.27943	0.00677	-0.06401									-186.3	-0.13439	0.148659	-0.104668	0.163135	0.0494752	-0.0977612									-186.3	-0.0122826	0.0166781	-0.0114847	0.0143293	0.00504691	-0.00967286		-186.3	0.000435682	0.0132977	0.00542876
-184.2	132.232	159.098	20.2796	143.982	53.2047	-44.2298		-184.2	-0.19136	0.11966	0.03004	0.06428	-0.1529	-0.00351									-184.2	-0.21677	0.0593688	-0.00837832	-0.0520152	-0.110195	-0.0372612									-184.2	-0.0198118	0.0066606	-0.000919306	-0.00456886	-0.0112408	-0.00368676		-184.2	-0.0055945	0.00906366	0.00370022
-182.1	132.344	158.979	20.2086	144.199	53.2966	-44.3823		-182.1	-0.07845	0.000576179	-0.03938	0.28233	-0.05987	-0.15651									-182.1	-0.10386	-0.059715	-0.0777983	0.166035	-0.0171648	-0.190261									-182.1	-0.00949234	-0.00669944	-0.00853637	0.014584	-0.00175096	-0.0188252		-182.1	-0.00512004	0.0111419	0.00454868
-180	132.344	158.919	20.0666	144.253	53.2736	-44.3518		-180	-0.07714	-0.05891	-0.17979	0.33789	-0.08174	-0.12651									-180	-0.10255	-0.119201	-0.218208	0.221595	-0.0390348	-0.160261									-180	-0.00937261	-0.0133732	-0.0239428	0.0194642	-0.00398189	-0.0158568		-180	-0.00784385	0.0149462	0.00610175
-177.9	132.316	158.979	20.2086	144.253	53.2507	-44.2908		-177.9	-0.10373	0.00080665	-0.03621	0.33934	-0.10351	-0.06601									-177.9	-0.12914	-0.0594845	-0.0746283	0.223045	-0.0608048	-0.0997612									-177.9	-0.0118028	-0.00667358	-0.00818855	0.0195916	-0.00620263	-0.00987075		-177.9	-0.00385779	0.0116733	0.00476563
-175.8	132.4	159.128	20.1613	144.253	53.1588	-44.1079		-175.8	-0.01872	0.14992	-0.08192	0.3408	-0.19429	0.11639									-175.8	-0.0441299	0.0896288	-0.120338	0.224505	-0.151585	0.0826388									-175.8	-0.00403328	0.0100555	-0.013204	0.0197198	-0.015463	0.0081766		-175.8	0.000875266	0.014014	0.0057212
-173.7	132.4	159.069	20.1849	143.874	53.1129	-44.1689		-173.7	-0.0174	0.09044	-0.05674	-0.03665	-0.23906	0.05489									-173.7	-0.0428099	0.0301488	-0.0951583	-0.152945	-0.196355	0.0211388									-173.7	-0.00391264	0.0033824	-0.0104412	-0.0134343	-0.0200299	0.00209156		-173.7	-0.00705734	0.00919764	0.00375492
-171.6	132.372	159.128	20.1849	144.036	53.2277	-44.1689		-171.6	-0.04399	0.15015	-0.05516	0.12721	-0.12313	0.05439									-171.6	-0.0693999	0.0898588	-0.0935783	0.0109148	-0.0804248	0.0206388									-171.6	-0.00634284	0.0100813	-0.0102678	0.000958728	-0.00820404	0.00204209		-171.6	-0.00195544	0.00770383	0.00314508
-169.5	132.428	158.562	20.1849	143.874	53.2047	-44.3823		-169.5	0.01312	-0.41593	-0.05357	-0.03374	-0.145	-0.15951									-169.5	-0.0122899	-0.476221	-0.0919883	-0.150035	-0.102295	-0.193261									-169.5	-0.00112324	-0.0534274	-0.0100934	-0.0131786	-0.010435	-0.019122		-169.5	-0.0178966	0.0183527	0.00749246
-167.4	132.428	159.218	20.2086	143.874	53.2736	-44.2603		-167.4	0.01443	0.23978	-0.02829	-0.03229	-0.07497	-0.03801									-167.4	-0.0109799	0.179489	-0.0667083	-0.148585	-0.0322648	-0.0717612									-167.4	-0.00100352	0.0201369	-0.00731953	-0.0130513	-0.00329129	-0.00710032		-167.4	-0.00193818	0.0115682	0.00472271
-165.3	132.205	159.039	20.1376	143.928	53.2507	-44.0165		-165.3	-0.20746	0.0611	-0.0977	0.02327	-0.09674	0.20528									-165.3	-0.23287	0.000808817	-0.136118	-0.0930252	-0.0540348	0.171529									-165.3	-0.0212833	9.07414e-05	-0.0149355	-0.00817106	-0.00551203	0.0169717		-165.3	-0.00547323	0.0132778	0.00542066
-163.2	132.316	159.158	20.3033	144.036	53.2047	-44.1384		-163.2	-0.09454	0.18041	0.06958	0.13302	-0.14161	0.08288									-163.2	-0.11995	0.120119	0.0311617	0.0167248	-0.0989048	0.0491288									-163.2	-0.0109629	0.0134762	0.0034192	0.00146906	-0.0100892	0.00486099		-163.2	0.000362225	0.00938375	0.0038309
-161.1	132.428	159.128	20.0903	143.928	53.2507	-44.1689		-161.1	0.01837	0.15073	-0.14183	0.02618	-0.09448	0.05188									-161.1	-0.00703992	0.0904388	-0.180248	-0.0901152	-0.0517748	0.0181288									-161.1	-0.000643417	0.0101464	-0.0197776	-0.00791545	-0.00528149	0.00179374		-161.1	-0.00361298	0.0100991	0.00412295
-159	132.316	159.098	20.2323	143.82	53.3655	-44.1994		-159	-0.09192	0.12104	0.00175	-0.08057	0.02144	0.02088									-159	-0.11733	0.0607488	-0.0366683	-0.196865	0.0641452	-0.0128712									-159	-0.0107234	0.00681542	-0.00402341	-0.0172921	0.00654338	-0.00127352		-159	-0.0033256	0.00953651	0.00389326
-156.9	132.54	159.128	20.2796	143.982	53.2736	-44.0165		-156.9	0.13269	0.15096	0.05063	0.08319	-0.06933	0.20328									-156.9	0.10728	0.0906688	0.0122117	-0.0331052	-0.0266248	0.169529									-156.9	0.00980492	0.0101722	0.00133992	-0.00290786	-0.00271596	0.0167738		-156.9	0.00541117	0.00803634	0.00328082
-154.8	132.54	159.039	20.2086	143.82	53.1588	-44.1079		-154.8	0.134	0.06167	-0.01878	-0.07766	-0.183	0.11138									-154.8	0.10859	0.00137882	-0.0571983	-0.193955	-0.140295	0.0776288									-154.8	0.00992465	0.00015469	-0.00627605	-0.0170364	-0.0143113	0.00768089		-154.8	-0.0033106	0.0111911	0.00456874
-152.7	132.372	159.277	20.2796	143.874	53.2966	-44.1994		-152.7	-0.03219	0.30019	0.0538	-0.02211	-0.04407	0.01938									-152.7	-0.0575999	0.239899	0.0153817	-0.138405	-0.00136477	-0.0143712									-152.7	-0.00526438	0.0269143	0.00168775	-0.0121571	-0.000139219	-0.00142194		-152.7	0.00160324	0.0133368	0.00544474
-150.6	132.512	159.098	20.2796	143.928	53.3425	-44.1079		-150.6	0.10873	0.1215	0.05539	0.03345	0.00296	0.11038									-150.6	0.0833201	0.0612088	0.0169717	-0.0828452	0.0456652	0.0766288									-150.6	0.00761509	0.00686703	0.00186221	-0.00727687	0.00465826	0.00758195		-150.6	0.00355128	0.005746	0.00234579
-148.5	132.4	158.949	20.2559	144.144	53.4114	-44.1079		-148.5	-0.00166	-0.02738	0.03327	0.2514	0.07299	0.10988									-148.5	-0.0270699	-0.0876712	-0.00514832	0.135105	0.115695	0.0761288									-148.5	-0.00247407	-0.00983585	-0.000564896	0.0118672	0.0118019	0.00753248		-148.5	0.00305447	0.00876425	0.00357799
-146.4	132.316	159.009	20.2323	143.928	53.2736	-44.3518		-146.4	-0.08405	0.03234	0.01126	0.03636	-0.06368	-0.13452									-146.4	-0.10946	-0.0279512	-0.0271583	-0.0799352	-0.0209748	-0.168271									-146.4	-0.0100042	-0.00313585	-0.00297993	-0.00702127	-0.00213961	-0.0166494		-146.4	-0.00698837	0.00560091	0.00228656
-144.3	132.4	158.89	20.2086	143.982	53.3655	-44.1079		-144.3	0.000962349	-0.08675	-0.01086	0.09191	0.02934	0.10887									-144.3	-0.0244476	-0.147041	-0.0492783	-0.0243852	0.0720452	0.0751188									-144.3	-0.0022344	-0.0164966	-0.00540703	-0.00214192	0.00734925	0.00743254		-144.3	-0.00191636	0.00892383	0.00364314
-142.2	132.428	159.009	20.2323	143.82	53.2966	-44.3518		-142.2	0.03017	0.03257	0.01443	-0.06893	-0.03843	-0.13553									-142.2	0.00476008	-0.0277212	-0.0239883	-0.185225	0.00427523	-0.169281									-142.2	0.00043505	-0.00311005	-0.0026321	-0.0162696	0.000436111	-0.0167493		-142.2	-0.00631499	0.00803674	0.00328098
-140.1	132.344	158.949	20.2559	143.82	53.1359	-44.2298		-140.1	-0.05221	-0.02692	0.03961	-0.06748	-0.198	-0.01403									-140.1	-0.0776199	-0.0872112	0.00119168	-0.183775	-0.155295	-0.0477812									-140.1	-0.00709412	-0.00978424	0.000130757	-0.0161423	-0.0158414	-0.00472765		-140.1	-0.00890983	0.00638185	0.00260538
-138	132.344	159.069	20.3979	143.928	53.2966	-44.047		-138	-0.0509	0.0924	0.18319	0.04217	-0.03617	0.16827									-138	-0.0763099	0.0321088	0.144772	-0.0741252	0.00653523	0.134519									-138	-0.00697439	0.0036023	0.015885	-0.00651094	0.000666651	0.0133098		-138	0.00332974	0.00966867	0.00394722
-135.9	132.456	159.039	20.2796	143.928	53.3196	-44.0165		-135.9	0.06201	0.06271	0.06648	0.04363	-0.01204	0.19827									-135.9	0.0366001	0.00241882	0.0280617	-0.0726652	0.0306652	0.164519									-135.9	0.00334508	0.000271368	0.00307905	-0.00638269	0.00312813	0.0162781		-135.9	0.00328651	0.00736801	0.00300798
-133.8	132.344	158.979	20.2796	143.928	53.1359	-44.047		-133.8	-0.04828	0.00323	0.06806	0.04508	-0.19461	0.16727									-133.8	-0.0736899	-0.0570612	0.0296417	-0.0712152	-0.151905	0.133519									-133.8	-0.00673493	-0.00640171	0.00325242	-0.00625533	-0.0154956	0.0132109		-133.8	-0.00307072	0.00994097	0.00405838
-131.7	132.288	158.979	20.2323	143.874	53.3196	-44.2603		-131.7	-0.10277	0.00334	0.02235	-0.00756	-0.00978	-0.04653									-131.7	-0.12818	-0.0569512	-0.0160683	-0.123855	0.0329252	-0.0802812									-131.7	-0.0117151	-0.00638937	-0.00176309	-0.0108791	0.00335867	-0.00794332		-131.7	-0.00588854	0.00575946	0.00235129
-129.6	132.205	158.919	20.1849	143.928	53.2507	-44.2298		-129.6	-0.18515	-0.05614	-0.02347	0.04799	-0.07756	-0.01653									-129.6	-0.21056	-0.116431	-0.0618883	-0.0683052	-0.0348548	-0.0502812									-129.6	-0.0192442	-0.0130624	-0.00679066	-0.00599972	-0.0035555	-0.00497501		-129.6	-0.00893793	0.00601915	0.00245731
-127.5	132.316	158.83	20.3269	143.549	53.2736	-44.047		-127.5	-0.07224	-0.14543	0.12012	-0.32945	-0.05353	0.16577									-127.5	-0.0976499	-0.205721	0.0817017	-0.445745	-0.0108248	0.132019									-127.5	-0.00892477	-0.0230799	0.00896467	-0.0391529	-0.00110422	0.0130624		-127.5	-0.00837245	0.0198842	0.0081177
-125.4	132.232	159.069	20.2086	144.09	53.2966	-44.2908		-125.4	-0.15463	0.09309	0.0034	0.2133	-0.0294	-0.07853									-125.4	-0.18004	0.0327988	-0.0350183	0.0970048	0.0133052	-0.112281									-125.4	-0.0164548	0.00367971	-0.00384236	0.00852062	0.00135725	-0.0111095		-125.4	-0.00297486	0.00942159	0.00384635
-123.3	132.288	159.277	20.2559	143.766	53.3655	-44.2603		-123.3	-0.09752	0.3018	0.05228	-0.11004	0.04063	-0.04854									-123.3	-0.12293	0.241509	0.0138617	-0.226335	0.0833352	-0.0822912									-123.3	-0.0112352	0.0270949	0.00152096	-0.0198806	0.00850093	-0.0081422		-123.3	-0.000356873	0.0167076	0.00682084
-121.2	132.205	158.979	20.3033	144.144	53.3884	-44.3518		-121.2	-0.17991	0.00392	0.10127	0.27031	0.06466	-0.14054									-121.2	-0.20532	-0.0563712	0.0628517	0.154015	0.107365	-0.174291									-121.2	-0.0187653	-0.0063243	0.00689636	0.0135282	0.0109522	-0.017245		-121.2	-0.00182631	0.0142831	0.00583105
-119.1	132.4	158.949	20.0903	143.982	53.3655	-44.2908		-119.1	0.01671	-0.02577	-0.11015	0.10936	0.04289	-0.08004									-119.1	-0.00869992	-0.0860612	-0.148568	-0.00693516	0.0855952	-0.113791									-119.1	-0.000795134	-0.00965522	-0.0163016	-0.000609164	0.00873147	-0.0112589		-119.1	-0.00498142	0.00910036	0.0037152
-117	132.372	159.069	20.2086	143.874	53.3655	-44.2298		-117	-0.00988	0.09355	0.00974	0.00262	0.04402	-0.01954									-117	-0.0352899	0.0332588	-0.0286783	-0.113675	0.0867252	-0.0532912									-117	-0.00322534	0.00373131	-0.00314671	-0.00998489	0.00884674	-0.00527283		-117	-0.00150862	0.00672811	0.00274674
-114.9	132.456	159.009	20.2796	143.928	53.3196	-44.0774		-114.9	0.07513	0.03406	0.08232	0.05817	-0.00075456	0.13236									-114.9	0.0497201	-0.0262312	0.0439017	-0.0581252	0.0419507	0.0986088									-114.9	0.00454419	-0.00294288	0.00481709	-0.00510554	0.00427934	0.00975673		-114.9	0.00255815	0.00552852	0.00225701
-112.8	132.456	159.188	20.1613	143.928	53.2736	-44.2603		-112.8	0.07644	0.21298	-0.03439	0.05963	-0.04563	-0.05104									-112.8	0.0510301	0.152689	-0.0728083	-0.0566652	-0.00292477	-0.0847912									-112.8	0.00466392	0.0171302	-0.00798885	-0.0049773	-0.000298353	-0.00838956		-112.8	2.33425e-05	0.00973921	0.00397602
-110.7	132.316	159.158	20.2086	144.144	53.1818	-44.0774		-110.7	-0.06175	0.18329	0.01449	0.27758	-0.1363	0.13136									-110.7	-0.0871599	0.122999	-0.0239283	0.161285	-0.0935948	0.0976088									-110.7	-0.00796603	0.0137993	-0.00262552	0.0141668	-0.0095475	0.00965779		-110.7	0.00291413	0.0109082	0.00445325
-108.6	132.54	158.979	20.2086	144.253	53.2507	-44.2298		-108.6	0.16287	0.00461	0.01608	0.38734	-0.06627	-0.02154									-108.6	0.13746	-0.0556812	-0.0223383	0.271045	-0.0235648	-0.0552912									-108.6	0.0125632	-0.00624688	-0.00245106	0.0238078	-0.00240382	-0.00547072		-108.6	0.00329976	0.012166	0.00496673
-106.5	132.484	159.069	20.3269	143.874	53.1588	-44.1994		-106.5	0.10828	0.09412	0.13596	0.00989	-0.15704	0.00836									-106.5	0.0828701	0.0338288	0.0975417	-0.106405	-0.114335	-0.0253912									-106.5	0.00757396	0.00379526	0.0107027	-0.00934632	-0.0116632	-0.0025123		-106.5	-0.000241642	0.00911769	0.00372228
-104.4	132.344	158.949	20.2086	143.982	53.1359	-44.2298		-104.4	-0.02991	-0.02496	0.01924	0.11954	-0.17881	-0.02254									-104.4	-0.0553199	-0.0852512	-0.0191783	0.00324484	-0.136105	-0.0562912									-104.4	-0.005056	-0.00956435	-0.00210433	0.000285017	-0.0138839	-0.00556966		-104.4	-0.0059822	0.00511102	0.00208656
-102.3	132.232	159.396	20.2086	144.036	53.3655	-44.1689		-102.3	-0.1402	0.42216	0.02083	0.1752	0.05192	0.03785									-102.3	-0.16561	0.361869	-0.0175883	0.0589048	0.0946252	0.00409884									-102.3	-0.015136	0.0405981	-0.00192987	0.00517403	0.00965261	0.000405555		-102.3	0.00646074	0.018712	0.00763914
-100.2	132.316	159.009	20.3269	144.036	53.3196	-44.1689		-100.2	-0.05519	0.03487	0.14071	0.17665	0.00715	0.03735									-100.2	-0.0805999	-0.0254212	0.102292	0.0603548	0.0498552	0.00359884									-100.2	-0.00736648	-0.00285201	0.0112239	0.00530139	0.00508568	0.000356083		-100.2	0.00195809	0.00662519	0.00270472
-98.1	132.288	159.158	20.2796	144.09	53.2507	-44.4127		-98.1	-0.08178	0.18399	0.095	0.23221	-0.06063	-0.20695									-98.1	-0.10719	0.123699	0.0565817	0.115915	-0.0179248	-0.240701									-98.1	-0.00979668	0.0138778	0.00620839	0.0101816	-0.00182849	-0.0238159		-98.1	-0.000862208	0.0141199	0.00576442
-96	132.372	159.218	20.2323	144.144	53.1129	-44.1994		-96	0.00324	0.2437	0.04928	0.28776	-0.1973	0.00585									-96	-0.0221699	0.183409	0.0108617	0.171465	-0.154595	-0.0279012									-96	-0.00202623	0.0205767	0.00119179	0.015061	-0.01577	-0.00276065		-96	0.00271209	0.0131753	0.00537879
-93.9	132.428	158.949	20.2559	143.982	53.2277	-44.1994		-93.9	0.06035	-0.02438	0.07447	0.12682	-0.08137	0.00535									-93.9	0.0349401	-0.0846712	0.0360517	0.0105248	-0.0386648	-0.0284012									-93.9	0.00319337	-0.00949928	0.00395575	0.000924471	-0.00394415	-0.00281012		-93.9	-0.00136333	0.00508405	0.00207555
-91.8	132.316	159.039	20.1376	144.036	53.2507	-44.0165		-91.8	-0.04994	0.06513	-0.04225	0.18247	-0.05724	0.18775									-91.8	-0.0753499	0.00483882	-0.0806683	0.0661748	-0.0145348	0.153999									-91.8	-0.00688665	0.000542868	-0.00885128	0.0058126	-0.00148268	0.0152372		-91.8	0.000728682	0.0088435	0.00361035
-89.7	132.428	159.128	20.1613	143.82	53.2047	-44.0165		-89.7	0.06297	0.15465	-0.01697	-0.03258	-0.10211	0.18725									-89.7	0.0375601	0.0943588	-0.0553883	-0.148875	-0.0594048	0.153499									-89.7	0.00343282	0.0105861	-0.00607745	-0.0130768	-0.00605982	0.0151878		-89.7	0.00066545	0.0109226	0.00445915
-87.6	132.344	159.128	20.2796	144.144	53.3196	-44.2298		-87.6	-0.01942	0.15476	0.10292	0.29358	0.01392	-0.02655									-87.6	-0.0448299	0.0944688	0.0645017	0.177285	0.0566252	-0.0603012									-87.6	-0.00409726	0.0105985	0.00707741	0.0155722	0.00577628	-0.00596642		-87.6	0.00482678	0.00837705	0.00341992
-85.5	132.344	158.979	20.3506	143.982	53.3655	-44.3213		-85.5	-0.0181	0.00588	0.1755	0.13263	0.06095	-0.11855									-85.5	-0.0435099	-0.0544112	0.137082	0.0163348	0.103655	-0.152301									-85.5	-0.00397661	-0.0061044	0.0150412	0.0014348	0.0105738	-0.0150693		-85.5	0.000316582	0.0111325	0.00454481
-83.4	132.344	158.8	20.2323	143.874	53.2507	-44.2603		-83.4	-0.01679	-0.17281	0.05879	0.02589	-0.05273	-0.05805									-83.4	-0.0421999	-0.233101	0.0203717	-0.0904052	-0.0100248	-0.0918012									-83.4	-0.00385689	-0.0261517	0.00223527	-0.00794092	-0.00102262	-0.00908315		-83.4	-0.00763666	0.0100048	0.00408443
-81.3	132.232	159.098	20.3033	144.09	53.1818	-44.1384		-81.3	-0.12708	0.12531	0.13137	0.24384	-0.1205	0.06334									-81.3	-0.15249	0.0650188	0.0929517	0.127545	-0.0777948	0.0295888									-81.3	-0.0139369	0.00729448	0.0101991	0.0112032	-0.00793576	0.00292763		-81.3	0.00162528	0.0103216	0.00421377
-79.2	132.316	158.8	20.3269	143.982	53.1588	-44.1384		-79.2	-0.04207	-0.17258	0.15656	0.137	-0.14237	0.06284									-79.2	-0.0674799	-0.232871	0.118142	0.0207048	-0.0996648	0.0290888									-79.2	-0.00616737	-0.0261259	0.012963	0.00181865	-0.0101667	0.00287816		-79.2	-0.00413335	0.0134245	0.00548052
-77.1	132.372	158.86	20.2086	143.766	53.2047	-44.1689		-77.1	0.01504	-0.11286	0.03984	-0.07805	-0.09534	0.03184									-77.1	-0.0103699	-0.173151	0.00142168	-0.194345	-0.0526348	-0.00191116									-77.1	-0.000947765	-0.0194259	0.000155993	-0.0170707	-0.00536921	-0.000189097		-77.1	-0.00714111	0.00886101	0.00361749
-75	132.288	159.069	20.1613	144.09	53.2966	-44.1079		-75	-0.06734	0.09585	-0.00587	0.2482	-0.00231	0.09234									-75	-0.0927499	0.0355588	-0.0442883	0.131905	0.0403952	0.0585888									-75	-0.00847693	0.00398935	-0.00485951	0.0115861	0.00412067	0.005797		-75	0.00202612	0.00736995	0.00300877
-72.9	132.595	158.919	20.2086	144.307	53.2736	-44.0774		-72.9	0.24097	-0.05303	0.04301	0.46616	-0.02418	0.12234									-72.9	0.21556	-0.113321	0.00459168	0.349865	0.0185252	0.0885888									-72.9	0.0197012	-0.0127135	0.00050382	0.0307311	0.00188974	0.00876532		-72.9	0.00814628	0.0153405	0.00626274
-70.8	132.456	159.039	20.3506	143.982	53.2507	-43.925		-70.8	0.10268	0.06628	0.18659	0.14281	-0.04595	0.27424									-70.8	0.0772701	0.00598882	0.148172	0.0265148	-0.00324477	0.240489									-70.8	0.00706214	0.000671887	0.016258	0.00232899	-0.000330996	0.0237949		-70.8	0.00829749	0.00972923	0.00397194
-68.7	132.428	159.069	20.3506	144.09	53.2736	-44.0165		-68.7	0.07609	0.0962	0.18818	0.25257	-0.02192	0.18224									-68.7	0.0506801	0.0359088	0.149762	0.136275	0.0207852	0.148489									-68.7	0.00463193	0.00402862	0.0164325	0.01197	0.00212028	0.014692		-68.7	0.00897923	0.00612511	0.00250057
-66.6	132.372	159.039	20.2086	143.928	53.3196	-44.0165		-66.6	0.0216	0.06651	0.04776	0.09162	0.0252	0.18174									-66.6	-0.00380992	0.00621882	0.00934168	-0.0246752	0.0679052	0.147989									-66.6	-0.00034821	0.00069769	0.00102501	-0.00216739	0.00692694	0.0146426		-66.6	0.00346277	0.00627374	0.00256124
-64.5	132.344	158.83	20.2086	144.199	53.3196	-44.047		-64.5	-0.00498	-0.14197	0.04935	0.36378	0.02633	0.15074									-64.5	-0.0303899	-0.202261	0.0109317	0.247485	0.0690352	0.116989									-64.5	-0.0027775	-0.0226917	0.00119947	0.0217383	0.00704221	0.0115753		-64.5	0.00268102	0.0150803	0.00615651
-62.4	132.4	159.069	20.2086	143.928	53.2736	-44.0774		-62.4	0.05213	0.09654	0.05093	0.09453	-0.01854	0.11984									-62.4	0.0267201	0.0362488	0.0125117	-0.0217652	0.0241652	0.0860888									-62.4	0.0024421	0.00406676	0.00137284	-0.00191179	0.00246507	0.00851796		-62.4	0.00282549	0.00342852	0.00139969
-60.3	132.344	159.069	20.1613	144.144	53.3425	-44.0165		-60.3	-0.00236	0.09666	0.00522	0.31248	0.05149	0.18024									-60.3	-0.0277699	0.0363688	-0.0331983	0.196185	0.0941952	0.146489									-60.3	-0.00253805	0.00408023	-0.00364267	0.0172323	0.00960875	0.0144942		-60.3	0.00653912	0.00870815	0.00355509
-58.2	132.54	158.949	20.3033	144.09	53.1359	-44.1384		-58.2	0.19435	-0.02242	0.1488	0.25984	-0.15398	0.05783									-58.2	0.16894	-0.0827112	0.110382	0.143545	-0.111275	0.0240788									-58.2	0.0154404	-0.00927939	0.0121116	0.0126086	-0.011351	0.00238245		-58.2	0.00365209	0.0117019	0.00477728
-56.1	132.4	158.979	20.1376	143.874	53.2507	-44.1689		-56.1	0.05606	0.00749	-0.01532	0.04479	-0.03805	0.02683									-56.1	0.0306501	-0.0528012	-0.0537383	-0.0715052	0.00465523	-0.00692116									-56.1	0.00280128	-0.00592378	-0.0058964	-0.0062808	0.000474874	-0.000684806		-56.1	-0.00258494	0.00394354	0.00160994
-54	132.344	159.098	20.2086	143.766	53.2277	-44.1689		-54	0.00158	0.12681	0.05727	-0.06205	-0.05992	0.02633									-54	-0.0238299	0.0665188	0.0188517	-0.178345	-0.0172148	-0.00742116									-54	-0.00217795	0.00746276	0.00206849	-0.0156653	-0.00175606	-0.000734277		-54	-0.00180039	0.00767192	0.00313205
-51.9	132.344	159.009	20.1613	143.766	53.2966	-44.1994		-51.9	0.00289	0.03752	0.01155	-0.0606	0.0101	-0.00467									-51.9	-0.0225199	-0.0227712	-0.0268683	-0.176895	0.0528052	-0.0384212									-51.9	-0.00205822	-0.0025547	-0.00294811	-0.0155379	0.0053866	-0.00380153		-51.9	-0.00358565	0.00674103	0.00275202
-49.8	132.428	158.979	20.3742	143.657	53.2277	-44.0774		-49.8	0.0879	0.00784	0.22604	-0.16734	-0.05767	0.11683									-49.8	0.0624901	-0.0524512	0.187622	-0.283635	-0.0149648	0.0830788									-49.8	0.00571132	-0.00588451	0.0205867	-0.0249137	-0.00152654	0.00822014		-49.8	0.000365567	0.0153678	0.00627388
-47.7	132.428	159.188	20.0666	143.874	53.2277	-43.986		-47.7	0.08921	0.21655	-0.07998	0.05061	-0.05654	0.20773									-47.7	0.0638001	0.156259	-0.118398	-0.0656852	-0.0138348	0.173979									-47.7	0.00583104	0.0175307	-0.0129912	-0.00576959	-0.00141127	0.0172141		-47.7	0.00340064	0.0124283	0.00507385
-45.6	132.4	158.83	20.1376	143.982	53.1588	-44.0165		-45.6	0.06262	-0.14093	-0.00739	0.16026	-0.12431	0.17673									-45.6	0.0372101	-0.201221	-0.0458083	0.0439648	-0.0816048	0.142979									-45.6	0.00340084	-0.022575	-0.00502629	0.00386174	-0.00832441	0.0141469		-45.6	-0.00241938	0.0126149	0.00515003
-43.5	132.456	159.039	20.2796	143.982	53.2736	-44.1689		-43.5	0.11973	0.06778	0.13619	0.16172	-0.00838	0.02383									-43.5	0.0943201	0.00748882	0.0977717	0.0454248	0.0343252	-0.00992116									-43.5	0.00862044	0.000840172	0.0107279	0.00398998	0.00350148	-0.000981637		-43.5	0.00444973	0.00448218	0.00182984
-41.4	132.4	159.009	20.2323	144.036	53.3425	-44.3518		-41.4	0.06525	0.0381	0.09048	0.21737	0.06165	-0.15957									-41.4	0.0398401	-0.0221912	0.0520617	0.101075	0.104355	-0.193321									-41.4	0.00364121	-0.00248963	0.00571244	0.00887812	0.0106452	-0.0191279		-41.4	0.00120989	0.0109665	0.00447707
-39.3	132.456	159.009	20.2559	143.874	53.2736	-44.0774		-39.3	0.12236	0.03821	0.11566	0.05643	-0.00612	0.11433									-39.3	0.0969501	-0.0220812	0.0772417	-0.0598652	0.0365852	0.0805788									-39.3	0.00886081	-0.00247729	0.0084753	-0.00525838	0.00373202	0.00797278		-39.3	0.00355087	0.00609874	0.0024898
-37.2	132.344	158.979	20.2796	144.199	53.3196	-44.2298		-37.2	0.01207	0.00853	0.14094	0.38268	0.041	-0.03858									-37.2	-0.0133399	-0.0517612	0.102522	0.266385	0.0837052	-0.0723312									-37.2	-0.00121921	-0.0058071	0.0112491	0.0233985	0.00853868	-0.00715672		-37.2	0.00483387	0.0117743	0.00480683
-35.1	132.456	159.009	20.2086	143.928	53.1818	-44.1689		-35.1	0.12498	0.03844	0.07153	0.11344	-0.09567	0.02182									-35.1	0.0995701	-0.0218512	0.0331117	-0.00285516	-0.0529648	-0.0119312									-35.1	0.00910026	-0.00245149	0.00363316	-0.000250789	-0.00540288	-0.00118051		-35.1	0.000574626	0.00511255	0.00208719
-33	132.54	158.83	20.1849	143.982	53.3425	-44.1079		-33	0.21009	-0.14024	0.04941	0.16899	0.06616	0.08232									-33	0.18468	-0.200531	0.0109917	0.0526948	0.108865	0.0485688									-33	0.0168789	-0.0224976	0.00120606	0.00462856	0.0111052	0.00480559		-33	0.00268779	0.0135425	0.0055287
-30.9	132.623	159.575	20.0903	143.928	53.1588	-44.1994		-30.9	0.29511	0.60487	-0.0436	0.11634	-0.11641	-0.00968									-30.9	0.2697	0.544579	-0.0820183	4.48421e-05	-0.0737048	-0.0434312									-30.9	0.0246494	0.0610964	-0.00899941	3.9388e-06	-0.00751854	-0.00429724		-30.9	0.0108224	0.0275449	0.0112451
-28.8	132.512	158.8	20.2323	144.199	53.2277	-44.3518		-28.8	0.18482	-0.16981	0.09998	0.3885	-0.04638	-0.16258									-28.8	0.15941	-0.230101	0.0615617	0.272205	-0.00367477	-0.196331									-28.8	0.0145694	-0.0258151	0.00675482	0.0239097	-0.00037486	-0.0194257		-28.8	-6.3641e-05	0.019357	0.00790245
-26.7	132.484	158.949	20.1376	143.657	53.2736	-44.2603		-26.7	0.15813	-0.0207	0.00687	-0.15135	0.000648151	-0.07158									-26.7	0.13272	-0.0809912	-0.0315483	-0.267645	0.0433534	-0.105331									-26.7	0.01213	-0.00908642	-0.00346162	-0.0235092	0.00442243	-0.0104219		-26.7	-0.00498777	0.012436	0.00507697
-24.6	132.456	158.919	20.3269	144.036	53.2507	-44.1689		-24.6	0.13154	-0.05038	0.19775	0.22901	-0.02112	0.01932									-24.6	0.10613	-0.110671	0.159332	0.112715	0.0215852	-0.0144312									-24.6	0.00969982	-0.0124162	0.0174826	0.00990054	0.00220188	-0.00142787		-24.6	0.00424012	0.0104969	0.00428535
-22.5	132.344	158.949	20.1376	143.982	53.2736	-44.2908		-22.5	0.02125	-0.02047	0.01003	0.17626	0.00291	-0.10308									-22.5	-0.00415992	-0.0807612	-0.0283883	0.0599648	0.0456152	-0.136831									-22.5	-0.000380198	-0.00906061	-0.00311489	0.00526714	0.00465316	-0.0135386		-22.5	-0.00269567	0.00749707	0.00306067
-20.4	132.456	159.158	20.1613	143.711	53.2507	-44.0774		-20.4	0.13417	0.18825	0.03532	-0.09288	-0.01887	0.10982									-20.4	0.10876	0.127959	-0.00309832	-0.209175	0.0238352	0.0760688									-20.4	0.00994019	0.0143557	-0.000339961	-0.0183733	0.0024314	0.00752654		-20.4	0.0025901	0.0115317	0.00470779
-18.3	132.512	159.098	20.1849	143.874	53.3196	-44.0774		-18.3	0.19138	0.12876	0.0605	0.07097	0.05116	0.10932									-18.3	0.16597	0.0684688	0.0220817	-0.0453252	0.0938652	0.0755688									-18.3	0.0151689	0.00768153	0.0024229	-0.00398123	0.00957509	0.00747707		-18.3	0.00639071	0.00653245	0.00266686
-16.2	132.595	159.069	20.1613	143.711	53.2277	-44.1994		-16.2	0.27639	0.09908	0.03849	-0.08998	-0.03961	-0.01319									-16.2	0.25098	0.0387888	7.16842e-05	-0.206275	0.00309523	-0.0469412									-16.2	0.0229385	0.00435173	7.86551e-06	-0.0181186	0.000315741	-0.00464454		-16.2	0.000808443	0.0133502	0.00545021
-14.1	132.595	158.949	20.2323	143.874	53.4573	-44.2908		-14.1	0.2777	-0.02	0.11107	0.07388	0.19112	-0.10509									-14.1	0.25229	-0.0802912	0.0726517	-0.0424152	0.233825	-0.138841									-14.1	0.0230582	-0.00900789	0.00797166	-0.00372562	0.0238523	-0.0137375		-14.1	0.00473519	0.0162072	0.00661656
-12	132.567	159.128	20.2559	143.766	53.2507	-44.2298		-12	0.25111	0.16124	0.13626	-0.03297	-0.01203	-0.04459									-12	0.2257	0.100949	0.0978417	-0.149265	0.0306752	-0.0783412									-12	0.020628	0.0113255	0.0107356	-0.013111	0.00312915	-0.00775137		-12	0.00415931	0.0127044	0.00518655
-9.9	132.456	158.949	20.2796	143.766	53.2507	-44.0165		-9.9	0.14073	-0.01234	0.16154	-0.03151	-0.00582	0.16821									-9.9	0.11532	-0.0726312	0.123122	-0.147805	0.0368852	0.134459									-9.9	0.0105397	-0.00814851	0.0135095	-0.0129828	0.00376262	0.0133039		-9.9	0.00333073	0.0114292	0.00466594
-7.8	132.623	159.009	20.2323	143.766	53.4344	-43.986		-7.8	0.31198	0.05248	0.11768	-0.03006	0.18409	0.20225									-7.8	0.28657	-0.00781118	0.0792617	-0.146355	0.226795	0.168499									-7.8	0.0261912	-0.000876338	0.00869694	-0.0128554	0.0231351	0.0166719		-7.8	0.0101606	0.014976	0.00611394
-5.7	132.344	159.188	20.2323	143.766	53.4573	-44.1689		-5.7	0.039	0.23651	0.12291	-0.0286	0.2132	0.02488									-5.7	0.0135901	0.176219	0.0844917	-0.144895	0.255905	-0.00887116									-5.7	0.00124207	0.01977	0.0092708	-0.0127272	0.0261046	-0.000877746		-5.7	0.00713043	0.0142653	0.00582377
-3.6	132.428	159.009	20.1139	144.144	53.1818	-44.2908		-3.6	0.12882	0.06293	0.00975	0.35372	-0.05608	-0.09149									-3.6	0.10341	0.00263882	-0.0286683	0.237425	-0.0133748	-0.125241									-3.6	0.00945122	0.000296049	-0.00314561	0.0208547	-0.00136435	-0.0123918		-3.6	0.00228336	0.0114749	0.0046846
-1.5	132.456	159.098	20.2086	143.874	53.2966	-44.2908		-1.5	0.16284	0.15755	0.10969	0.0873	0.06493	-0.08596									-1.5	0.13743	0.0972588	0.0712717	-0.0289952	0.107635	-0.119711									-1.5	0.0125605	0.0109115	0.00782024	-0.00254685	0.0109797	-0.0118447		-1.5	0.00464674	0.00975466	0.00398232
0.6	133.795	159.694	21.0368	144.794	54.4447	-42.9191		0.6	1.50866	0.75877	0.94312	1.01168	1.21924	1.29127									0.6	1.48325	0.698479	0.904702	0.895385	1.26195	1.25752									0.6	0.135562	0.0783625	0.0992678	0.078648	0.12873	0.124424		0.6	0.107499	0.0255883	0.0104464
2.7	138.819	164.015	25.5565	149.936	59.1751	-38.1334		2.7	6.53838	5.0849	5.46806	6.15806	5.95585	6.0825									2.7	6.51297	5.02461	5.42964	6.04176	5.99856	6.04875									2.7	0.595257	0.563712	0.595764	0.530691	0.611906	0.598486		2.7	0.582636	0.0299867	0.012242
4.8	141.359	165.982	27.7572	152.913	61.5173	-35.9996		4.8	9.0842	7.05682	7.67399	9.13934	8.30427	8.22183									4.8	9.05879	6.99653	7.63557	9.02304	8.34698	8.18808									4.8	0.827933	0.784942	0.837808	0.792558	0.851466	0.81016		4.8	0.817478	0.0261188	0.010663
6.9	142.698	167.174	28.7748	154.754	62.5965	-34.5365		6.9	10.4299	8.25404	8.69683	10.9838	9.38968	9.69046									6.9	10.4045	8.19375	8.65841	10.8675	9.43239	9.65671									6.9	0.950926	0.919258	0.950039	0.954571	0.962187	0.955471		6.9	0.948742	0.0150716	0.00615296
9	143.452	168.008	29.2244	155.295	63.1247	-33.8354		9	11.1896	9.09366	9.15167	11.5293	9.92409	10.3971									9	11.1642	9.03337	9.11325	11.413	9.9668	10.3633									9	1.02036	1.01346	0.999946	1.00248	1.0167	1.02539		9	1.01306	0.0100253	0.00409282
11.1	143.619	168.217	29.603	155.674	63.4232	-33.561		11.1	11.3632	9.30748	9.5355	11.9124	10.2288	10.677									11.1	11.3378	9.24719	9.49708	11.7961	10.2715	10.6433									11.1	1.03622	1.03744	1.04206	1.03613	1.04778	1.05309		11.1	1.04212	0.00699793	0.00285689
13.2	143.424	168.008	29.4847	155.566	63.0558	-33.9878		13.2	11.1739	9.10411	9.42244	11.8084	9.86761	10.2558									13.2	11.1485	9.04382	9.38402	11.6921	9.91032	10.222									13.2	1.01892	1.01463	1.02966	1.027	1.01094	1.0114		13.2	1.01876	0.00798649	0.00326047
15.3	142.922	168.008	29.0114	155.024	62.5736	-34.5669		15.3	10.6777	9.10933	8.95437	11.2712	9.39163	9.68218									15.3	10.6523	9.04904	8.91595	11.1549	9.43434	9.64843									15.3	0.973572	1.01521	0.978297	0.979817	0.962386	0.954652		15.3	0.977323	0.0209477	0.00855185
17.4	142.308	167.353	28.4198	154.321	61.7469	-35.2071		17.4	10.0698	8.45895	8.36801	10.5717	8.57114	9.04751									17.4	10.0444	8.39866	8.32959	10.4554	8.61385	9.01376									17.4	0.918015	0.942247	0.913959	0.918373	0.878689	0.891855		17.4	0.910523	0.0223512	0.00912485
19.5	141.498	166.548	27.6626	152.967	61.1728	-35.7862		19.5	9.26654	7.65957	7.61605	9.22269	8.00325	8.47394									19.5	9.24113	7.59928	7.57763	9.10639	8.04596	8.44019									19.5	0.844598	0.852565	0.831451	0.799879	0.820759	0.835104		19.5	0.830726	0.0186545	0.00761567
21.6	140.633	166.012	27.0473	152.318	60.5299	-36.5788		21.6	8.40756	7.12839	7.00598	8.57727	7.36656	7.68687									21.6	8.38215	7.0681	6.96756	8.46097	7.40927	7.65312									21.6	0.766091	0.792972	0.764511	0.743187	0.755811	0.757229		21.6	0.7633	0.0166562	0.00679985
23.7	139.88	165.475	26.4558	151.56	59.8869	-37.1275		23.7	7.66008	6.59722	6.41972	7.82365	6.72977	7.1437									23.7	7.63467	6.53693	6.3813	7.70735	6.77248	7.10995									23.7	0.697775	0.733379	0.700184	0.676991	0.690853	0.703485		23.7	0.700445	0.0186719	0.00762279
25.8	139.266	164.82	25.9588	151.019	59.198	-37.6152		25.8	7.0522	5.94694	5.92795	7.28663	6.04709	6.66153									25.8	7.02679	5.88665	5.88953	7.17033	6.0898	6.62778									25.8	0.642217	0.660424	0.646225	0.629821	0.621213	0.655778		25.8	0.642613	0.0150023	0.00612465
27.9	139.014	164.373	25.2726	150.477	58.6929	-38.1943		27.9	6.80712	5.50516	5.24699	6.74951	5.5482	6.08796									27.9	6.78171	5.44487	5.20857	6.63321	5.59091	6.05421									27.9	0.619818	0.610861	0.571507	0.582642	0.570322	0.599026		27.9	0.592363	0.0207635	0.00847668
30	138.484	163.777	25.0359	149.882	58.3254	-38.5297		30	6.28304	4.91438	5.01553	6.15829	5.18691	5.75809									30	6.25763	4.85409	4.97711	6.04199	5.22962	5.72434									30	0.57192	0.544581	0.546111	0.530711	0.533467	0.566388		30	0.548863	0.0169184	0.0069069
32.1	137.954	163.479	24.7993	149.341	58.0729	-39.0783		32.1	5.75886	4.62161	4.78416	5.62117	4.94062	5.21502									32.1	5.73345	4.56132	4.74574	5.50487	4.98333	5.18127									32.1	0.524012	0.511735	0.520724	0.483532	0.508343	0.512654		32.1	0.510167	0.0143145	0.00584386
34.2	137.647	163.062	24.468	149.07	57.5906	-39.4136		34.2	5.45798	4.20963	4.4581	5.35465	4.46453	4.88525									34.2	5.43257	4.14934	4.41968	5.23835	4.50724	4.8515									34.2	0.496513	0.465515	0.484947	0.460122	0.459778	0.480026		34.2	0.474483	0.0150229	0.00613305
36.3	137.228	163.062	24.3024	148.529	57.2921	-39.5356		36.3	5.0455	4.21485	4.29773	4.81753	4.17225	4.76878									36.3	5.02009	4.15456	4.25931	4.70123	4.21496	4.73503									36.3	0.458814	0.466101	0.46735	0.412943	0.429963	0.468502		36.3	0.450612	0.0234638	0.00957907
38.4	137.2	162.913	24.1367	148.421	57.0855	-39.688		38.4	5.02372	4.07107	4.13727	4.71351	3.97186	4.62191									38.4	4.99831	4.01078	4.09885	4.59721	4.01457	4.58816									38.4	0.456823	0.44997	0.449744	0.403806	0.409521	0.45397		38.4	0.437306	0.0239497	0.00977743
40.5	136.949	162.674	23.9238	147.988	56.8099	-39.9928		40.5	4.77864	3.83789	3.9296	4.28469	3.70247	4.32264									40.5	4.75323	3.7776	3.89118	4.16839	3.74518	4.28889									40.5	0.434424	0.42381	0.426958	0.36614	0.382041	0.424359		40.5	0.409622	0.0282332	0.0115261
42.6	136.642	162.495	23.7581	147.879	56.8558	-40.1452		42.6	4.47776	3.66432	3.76914	4.18057	3.75458	4.17577									42.6	4.45235	3.60403	3.73072	4.06427	3.79729	4.14202									42.6	0.406925	0.404337	0.409351	0.356994	0.387357	0.409827		42.6	0.395798	0.0207568	0.00847395
44.7	136.586	162.495	23.6635	147.933	56.6262	-40.3281		44.7	4.42808	3.66954	3.67978	4.23885	3.5312	3.9984									44.7	4.40267	3.60925	3.64136	4.12255	3.57391	3.96465									44.7	0.402385	0.404922	0.399546	0.362113	0.36457	0.392277		44.7	0.387636	0.0193038	0.00788076
46.8	136.558	162.108	23.3085	147.933	56.3966	-40.511		46.8	4.4063	3.28736	3.33001	4.24303	3.30781	3.82103									46.8	4.38089	3.22707	3.29159	4.12673	3.35052	3.78728									46.8	0.400394	0.362046	0.361168	0.36248	0.341782	0.374728		46.8	0.3671	0.0194408	0.00793669
48.9	136.251	161.959	23.1665	147.446	56.4195	-40.572		48.9	4.10542	3.14358	3.19325	3.76011	3.33692	3.76556									48.9	4.08001	3.08329	3.15483	3.64381	3.37963	3.73181									48.9	0.372895	0.345915	0.346162	0.320062	0.344752	0.369239		48.9	0.349837	0.0192323	0.00785157
51	136.112	161.929	23.2375	147.554	56.1899	-40.8158		51	3.97194	3.119	3.26948	3.87249	3.11353	3.52729									51	3.94653	3.05871	3.23106	3.75619	3.15624	3.49354									51	0.360695	0.343157	0.354526	0.329933	0.321964	0.345664		51	0.342657	0.014599	0.00596
53.1	136	161.989	23.1902	147.284	56.144	-40.7549		53.1	3.86646	3.18383	3.22742	3.60607	3.07384	3.59372									53.1	3.84105	3.12354	3.189	3.48977	3.11655	3.55997									53.1	0.351055	0.350431	0.349911	0.306532	0.317915	0.352237		53.1	0.338013	0.0203134	0.00829291
55.2	136.028	161.691	23.1665	147.121	56.3966	-40.9378		55.2	3.90047	2.89105	3.20896	3.44785	3.33266	3.41635									55.2	3.87506	2.83076	3.17054	3.33155	3.37537	3.3826									55.2	0.354163	0.317583	0.347886	0.292634	0.344317	0.334687		55.2	0.331878	0.0230649	0.00941619
57.3	135.944	161.661	23.0246	147.23	55.9603	-41.0902		57.3	3.82289	2.86647	3.07229	3.56033	2.90257	3.26948									57.3	3.79748	2.80618	3.03387	3.44403	2.94528	3.23573									57.3	0.347073	0.314826	0.33289	0.302514	0.300444	0.320155		57.3	0.31965	0.0179629	0.00733334
59.4	135.916	161.542	22.9062	147.176	55.7307	-41.3645		59.4	3.80101	2.75249	2.95913	3.51031	2.67918	3.00071									59.4	3.7756	2.6922	2.92071	3.39401	2.72189	2.96696									59.4	0.345073	0.302038	0.320473	0.29812	0.277656	0.293562		59.4	0.306154	0.0235452	0.00961229
61.5	135.805	161.423	22.8352	146.959	55.7995	-41.3645		61.5	3.69553	2.63852	2.89336	3.29799	2.75419	3.00624									61.5	3.67012	2.57823	2.85494	3.18169	2.7969	2.97249									61.5	0.335433	0.289252	0.313257	0.279471	0.285308	0.294109		61.5	0.299472	0.0210574	0.00859663
63.6	135.805	161.333	22.7406	147.013	55.7077	-41.1206		63.6	3.70165	2.55434	2.804	3.35627	2.6686	3.25567									63.6	3.67624	2.49405	2.76558	3.23997	2.71131	3.22192									63.6	0.335992	0.279808	0.303452	0.28459	0.276577	0.318789		63.6	0.299868	0.0238917	0.00975376
65.7	135.861	161.333	22.6933	147.121	55.6618	-41.4255		65.7	3.76357	2.55956	2.76194	3.46875	2.62892	2.9563									65.7	3.73816	2.49927	2.72352	3.35245	2.67163	2.92255									65.7	0.341651	0.280394	0.298837	0.29447	0.27253	0.289168		65.7	0.296175	0.0242295	0.00989165
67.8	135.693	161.75	22.6223	146.851	55.6158	-41.5169		67.8	3.60229	2.98198	2.69617	3.20232	2.58913	2.87042									67.8	3.57688	2.92169	2.65775	3.08602	2.63184	2.83667									67.8	0.326911	0.327785	0.29162	0.271067	0.268471	0.280671		67.8	0.294421	0.0267749	0.0109308
69.9	135.33	161.244	22.6223	146.58	55.5929	-41.395		69.9	3.24561	2.4806	2.70141	2.9358	2.57244	2.99785									69.9	3.2202	2.42031	2.66299	2.8195	2.61515	2.9641									69.9	0.294312	0.271535	0.292195	0.247657	0.266768	0.293279		69.9	0.277624	0.0189148	0.00772192
72	135.358	161.482	22.433	146.743	55.4092	-41.5169		72	3.27963	2.72423	2.51734	3.10238	2.39495	2.88148									72	3.25422	2.66394	2.47892	2.98608	2.43766	2.84773									72	0.297421	0.298868	0.271998	0.262289	0.248663	0.281765		72	0.276834	0.0198102	0.00808748
74.1	135.386	161.274	22.5276	146.851	55.547	-41.5169		74.1	3.31365	2.52085	2.61718	3.21486	2.53897	2.88701									74.1	3.28824	2.46056	2.57876	3.09856	2.58168	2.85326									74.1	0.300531	0.276051	0.282953	0.272169	0.263354	0.282312		74.1	0.279562	0.0125574	0.00512652
76.2	135.274	161.333	22.362	146.526	55.4551	-41.5474		76.2	3.20807	2.58567	2.45682	2.89424	2.45328	2.86204									76.2	3.18266	2.52538	2.4184	2.77794	2.49599	2.82829									76.2	0.290881	0.283323	0.265358	0.244006	0.254613	0.279842		76.2	0.26967	0.0181312	0.00740203
78.3	135.219	161.482	22.4566	146.851	55.3632	-41.7608		78.3	3.15839	2.73989	2.55665	3.22322	2.36759	2.65417									78.3	3.13298	2.6796	2.51823	3.10692	2.4103	2.62042									78.3	0.28634	0.300625	0.276311	0.272903	0.245872	0.259274		78.3	0.273554	0.0193628	0.00790481
80.4	135.386	161.184	22.362	146.689	55.2025	-41.6388		80.4	3.33201	2.44721	2.46729	3.065	2.2131	2.7817									80.4	3.3066	2.38692	2.42887	2.9487	2.25581	2.74795									80.4	0.302209	0.267789	0.266506	0.259006	0.230112	0.271892		80.4	0.266252	0.0231763	0.0094617
82.5	135.107	161.155	22.4093	146.418	55.2944	-41.6388		82.5	3.05903	2.42264	2.51982	2.79848	2.31121	2.78723									82.5	3.03362	2.36235	2.4814	2.68218	2.35392	2.75348									82.5	0.277259	0.265032	0.27227	0.235595	0.24012	0.27244		82.5	0.260453	0.0179893	0.00734412
84.6	135.051	161.184	22.3383	146.797	55.1336	-41.6693		84.6	3.00935	2.45766	2.45406	3.18156	2.15663	2.76226									84.6	2.98394	2.39737	2.41564	3.06526	2.19934	2.72851									84.6	0.272719	0.268961	0.265055	0.269244	0.224352	0.269969		84.6	0.261717	0.0184693	0.00754006
86.7	135.219	161.274	22.22	146.797	55.1107	-41.8827		86.7	3.18287	2.55218	2.34099	3.18574	2.13994	2.55439									86.7	3.15746	2.49189	2.30257	3.06944	2.18265	2.52064									86.7	0.288578	0.279566	0.252648	0.269611	0.222649	0.249402		86.7	0.260409	0.0238844	0.00975077
88.8	135.051	161.363	22.2437	146.905	55.0647	-41.7608		88.8	3.02159	2.6468	2.36993	3.29822	2.10015	2.68182									88.8	2.99618	2.58651	2.33151	3.18192	2.14286	2.64807									88.8	0.273838	0.290181	0.255824	0.279491	0.21859	0.26201		88.8	0.263322	0.0251089	0.0102507
90.9	135.247	161.214	22.1017	146.743	55.0877	-41.8217		90.9	3.22301	2.50303	2.23317	3.14	2.12936	2.62645									90.9	3.1976	2.44274	2.19475	3.0237	2.17207	2.5927									90.9	0.292246	0.274051	0.240818	0.265593	0.22157	0.256531		90.9	0.258468	0.0249453	0.0101839
93	134.912	161.035	22.1963	146.959	55.0647	-41.6998		93	2.89423	2.32955	2.333	3.36068	2.11257	2.75388									93	2.86882	2.26926	2.29458	3.24438	2.15528	2.72013									93	0.262197	0.254589	0.251772	0.284977	0.219857	0.26914		93	0.257089	0.0217706	0.00888782
95.1	135.079	160.946	22.1963	146.905	55.1107	-41.7608		95.1	3.06785	2.24537	2.33824	3.31076	2.16479	2.69841									95.1	3.04244	2.18508	2.29982	3.19446	2.2075	2.66466									95.1	0.278066	0.245144	0.252347	0.280592	0.225184	0.263651		95.1	0.257497	0.0210598	0.00859762
97.2	134.912	161.244	22.1963	146.743	55.0877	-41.6693		97.2	2.90647	2.54849	2.34347	3.15254	2.148	2.79544									97.2	2.88106	2.4882	2.30505	3.03624	2.19071	2.76169									97.2	0.263316	0.279152	0.25292	0.266695	0.223471	0.273252		97.2	0.259801	0.019912	0.00812903
99.3	134.689	161.184	22.149	147.013	54.8351	-41.7608		99.3	2.68939	2.49421	2.30141	3.42732	1.90161	2.70947									99.3	2.66398	2.43392	2.26299	3.31102	1.94432	2.67572									99.3	0.243476	0.273062	0.248305	0.290831	0.198337	0.264746		99.3	0.253126	0.0318504	0.0130029
101.4	134.828	161.303	22.22	146.797	54.9958	-41.8217		101.4	2.83501	2.61854	2.37765	3.215	2.06852	2.6541									101.4	2.8096	2.55825	2.33923	3.0987	2.11123	2.62035									101.4	0.256785	0.287011	0.256671	0.272181	0.215364	0.259267		101.4	0.25788	0.0239388	0.00977297
103.5	134.884	160.976	22.1253	146.689	54.9958	-41.7608		103.5	2.89693	2.29606	2.28818	3.11098	2.07473	2.72053									103.5	2.87152	2.23577	2.24976	2.99468	2.11744	2.68678									103.5	0.262444	0.250831	0.246854	0.263044	0.215997	0.26584		103.5	0.250835	0.0186468	0.00761252
105.6	134.772	161.095	22.1727	146.526	55.0188	-41.9132		105.6	2.79145	2.42048	2.34082	2.95276	2.10395	2.57366									105.6	2.76604	2.36019	2.3024	2.83646	2.14666	2.53991									105.6	0.252804	0.26479	0.25263	0.249147	0.218978	0.251308		105.6	0.248276	0.0153656	0.00627296
107.7	134.968	160.886	22.078	146.689	54.9499	-41.9742		107.7	2.99287	2.2171	2.25135	3.11934	2.04126	2.51819									107.7	2.96746	2.15681	2.21293	3.00304	2.08397	2.48444									107.7	0.271213	0.241973	0.242813	0.263779	0.212583	0.24582		107.7	0.246363	0.020465	0.00835479
109.8	134.884	160.916	22.0544	146.58	55.0188	-42.157		109.8	2.91529	2.25212	2.23299	3.01522	2.11637	2.34092									109.8	2.88988	2.19183	2.19457	2.89892	2.15908	2.30717									109.8	0.264122	0.245902	0.240798	0.254633	0.220245	0.22828		109.8	0.24233	0.0162882	0.00664962
111.9	134.856	161.095	22.0307	146.634	55.2025	-41.7913		111.9	2.89351	2.43615	2.21453	3.0735	2.30628	2.71215									111.9	2.8681	2.37586	2.17611	2.9572	2.34899	2.6784									111.9	0.262132	0.266548	0.238773	0.259752	0.239617	0.265011		111.9	0.255305	0.0126997	0.00518465
114	134.8	160.916	22.0544	147.121	55.1107	-41.7608		114	2.84383	2.26257	2.24346	3.56488	2.2207	2.74818									114	2.81842	2.20228	2.20504	3.44858	2.26341	2.71443									114	0.257591	0.247074	0.241947	0.302914	0.230887	0.268576		114	0.258165	0.0254607	0.0103943
116.1	134.828	161.035	22.22	147.013	54.9958	-41.7303		116.1	2.87785	2.38699	2.4143	3.46076	2.11201	2.78421									116.1	2.85244	2.3267	2.37588	3.34446	2.15472	2.75046									116.1	0.2607	0.261033	0.260692	0.293768	0.2198	0.272141		116.1	0.261356	0.0240612	0.00982296
118.2	134.689	161.006	22.007	146.797	55.0188	-41.8827		118.2	2.74447	2.36241	2.20653	3.24844	2.14122	2.63734									118.2	2.71906	2.30212	2.16811	3.13214	2.18393	2.60359									118.2	0.24851	0.258275	0.237895	0.275118	0.22278	0.257609		118.2	0.250031	0.0181494	0.00740945
120.3	134.716	160.976	22.007	146.959	54.8121	-41.8827		120.3	2.77849	2.33784	2.21177	3.41502	1.94073	2.64287									120.3	2.75308	2.27755	2.17335	3.29872	1.98344	2.60912									120.3	0.251619	0.255519	0.23847	0.28975	0.202328	0.258156		120.3	0.249307	0.028574	0.0116653
122.4	134.633	160.678	22.0307	146.634	54.881	-41.8827		122.4	2.70081	2.04506	2.24071	3.0944	2.01584	2.6484									122.4	2.6754	1.98477	2.20229	2.9781	2.05855	2.61465									122.4	0.24452	0.222672	0.241645	0.261588	0.20999	0.258703		122.4	0.239853	0.0201977	0.00824567
124.5	134.716	160.827	22.0544	146.743	54.9958	-42.0656		124.5	2.79073	2.19928	2.26964	3.20688	2.13686	2.47103									124.5	2.76532	2.13899	2.23122	3.09058	2.17957	2.43728									124.5	0.252738	0.239974	0.244819	0.271468	0.222335	0.241154		124.5	0.245415	0.0162061	0.00661611
126.6	134.772	160.857	21.936	146.689	54.9499	-42.0656		126.6	2.85265	2.2343	2.15648	3.15695	2.09717	2.47656									126.6	2.82724	2.17401	2.11806	3.04065	2.13988	2.44281									126.6	0.258397	0.243903	0.232403	0.267082	0.218286	0.241701		126.6	0.243629	0.0175512	0.00716524
128.7	134.661	160.767	21.7941	146.634	54.8121	-42.157		128.7	2.74707	2.15012	2.01981	3.10693	1.96558	2.39069									128.7	2.72166	2.08983	1.98139	2.99063	2.00829	2.35694									128.7	0.248748	0.234458	0.217407	0.262689	0.204863	0.233204		128.7	0.233561	0.0208063	0.00849414
130.8	134.716	160.916	21.936	146.472	54.904	-42.157		130.8	2.80909	2.30435	2.16695	2.94881	2.06369	2.39622									130.8	2.78368	2.24406	2.12853	2.83251	2.1064	2.36247									130.8	0.254416	0.251761	0.233552	0.2488	0.214871	0.233752		130.8	0.239525	0.015062	0.00614905
132.9	134.772	161.006	21.9834	146.689	54.904	-42.0656		132.9	2.87101	2.39897	2.21958	3.16949	2.0699	2.49315									132.9	2.8456	2.33868	2.18116	3.05319	2.11261	2.4594									132.9	0.260075	0.262377	0.239327	0.268184	0.215505	0.243342		132.9	0.248135	0.0195584	0.00798468
135	134.633	160.737	21.8177	146.634	54.904	-42.0046		135	2.73753	2.13599	2.05912	3.11947	2.07612	2.55968									135	2.71212	2.0757	2.0207	3.00317	2.11883	2.52593									135	0.247876	0.232873	0.22172	0.26379	0.216139	0.249925		135	0.238721	0.0182809	0.00746316
137.1	134.689	160.767	21.936	146.743	54.881	-42.0046		137.1	2.79955	2.17101	2.18266	3.23195	2.05933	2.56521									137.1	2.77414	2.11072	2.14424	3.11565	2.10204	2.53146									137.1	0.253544	0.236802	0.235276	0.27367	0.214426	0.250472		137.1	0.244032	0.0200789	0.00819717
139.2	134.8	160.827	21.936	146.634	54.927	-42.157		139.2	2.91727	2.23584	2.18789	3.12783	2.11154	2.41834									139.2	2.89186	2.17555	2.14947	3.01153	2.15425	2.38459									139.2	0.264303	0.244075	0.235849	0.264524	0.219752	0.23594		139.2	0.244074	0.0176227	0.00719442
141.3	134.661	160.946	22.0544	146.472	54.7892	-42.157		141.3	2.78379	2.36026	2.31153	2.96971	1.97995	2.42387									141.3	2.75838	2.29997	2.27311	2.85341	2.02266	2.39012									141.3	0.252104	0.258034	0.249416	0.250636	0.206329	0.236487		141.3	0.242168	0.0189283	0.00772743
143.4	134.772	160.946	21.9597	146.526	54.7892	-42.157		143.4	2.90161	2.36548	2.22206	3.02799	1.98616	2.4294									143.4	2.8762	2.30519	2.18364	2.91169	2.02887	2.39565									143.4	0.262872	0.25862	0.239599	0.255755	0.206962	0.237035		143.4	0.243474	0.0207175	0.00845789
145.5	134.716	161.065	21.9124	146.472	54.6973	-42.157		145.5	2.85193	2.4899	2.18	2.97807	1.90048	2.43493									145.5	2.82652	2.42961	2.14158	2.86177	1.94319	2.40118									145.5	0.258331	0.272578	0.234984	0.25137	0.198222	0.237582		145.5	0.242178	0.0255914	0.0104477
147.6	134.605	160.886	21.7704	146.526	54.7433	-42.1875		147.6	2.74635	2.31632	2.04324	3.03635	1.95269	2.40996									147.6	2.72094	2.25603	2.00482	2.92005	1.9954	2.37621									147.6	0.248682	0.253104	0.219978	0.256489	0.203548	0.235111		147.6	0.236152	0.0208982	0.00853166
149.7	134.605	160.797	21.9834	146.58	54.881	-42.2485		149.7	2.75247	2.23215	2.26147	3.09463	2.0966	2.35449									149.7	2.72706	2.17186	2.22305	2.97833	2.13931	2.32074									149.7	0.249241	0.243661	0.243923	0.261608	0.218228	0.229623		149.7	0.241047	0.0152068	0.00620813
151.8	134.493	160.767	21.936	146.472	54.904	-42.0046		151.8	2.64699	2.20757	2.21931	2.99061	2.12581	2.60392									151.8	2.62158	2.14728	2.18089	2.87431	2.16852	2.57017									151.8	0.239601	0.240904	0.239297	0.252471	0.221208	0.254302		151.8	0.241297	0.011871	0.00484633
153.9	134.577	160.916	21.865	146.58	54.881	-42.0046		153.9	2.73681	2.36179	2.15354	3.10299	2.10903	2.60945									153.9	2.7114	2.3015	2.11512	2.98669	2.15174	2.5757									153.9	0.24781	0.258206	0.23208	0.262342	0.219496	0.254849		153.9	0.245797	0.0166949	0.00681568
156	134.633	160.797	21.865	146.634	54.8121	-42.1875		156	2.79873	2.24781	2.15878	3.16127	2.04634	2.43208									156	2.77332	2.18752	2.12036	3.04497	2.08905	2.39833									156	0.253469	0.245418	0.232655	0.267462	0.213101	0.2373		156	0.241568	0.0186277	0.00760472
158.1	134.716	160.886	21.9834	146.634	54.8351	-42.157		158.1	2.88865	2.34243	2.28242	3.16545	2.07555	2.46811									158.1	2.86324	2.28214	2.244	3.04915	2.11826	2.43436									158.1	0.261687	0.256034	0.246222	0.267829	0.216081	0.240865		158.1	0.24812	0.0185358	0.00756723
160.2	134.605	160.797	21.8177	146.689	55.0418	-42.1266		160.2	2.78307	2.25826	2.12195	3.22383	2.28846	2.50404									160.2	2.75766	2.19797	2.08353	3.10753	2.33117	2.47029									160.2	0.252038	0.246591	0.228614	0.272957	0.2378	0.24442		160.2	0.24707	0.0150241	0.00613354
162.3	134.605	160.946	21.9597	146.851	54.8581	-42.0961		162.3	2.78919	2.41248	2.26919	3.39041	2.11097	2.54007									162.3	2.76378	2.35219	2.23077	3.27411	2.15368	2.50632									162.3	0.252597	0.263893	0.24477	0.287589	0.219694	0.247985		162.3	0.252755	0.0224366	0.00915968
164.4	134.8	160.886	21.9597	146.472	54.8581	-42.1875		164.4	2.99071	2.3581	2.27442	3.01569	2.11719	2.4542									164.4	2.9653	2.29781	2.236	2.89939	2.1599	2.42045									164.4	0.271015	0.257792	0.245344	0.254674	0.220329	0.239488		164.4	0.248107	0.0174085	0.00710697
166.5	134.605	160.827	21.9597	146.689	54.904	-42.1875		166.5	2.80143	2.30372	2.27966	3.23637	2.1693	2.45973									166.5	2.77602	2.24343	2.24124	3.12007	2.21201	2.42598									166.5	0.253716	0.251691	0.245919	0.274058	0.225644	0.240036		166.5	0.248511	0.0160705	0.00656075
168.6	134.633	160.886	21.9834	146.58	54.881	-42.1266		168.6	2.83545	2.36855	2.3086	3.13225	2.15251	2.52616									168.6	2.81004	2.30826	2.27018	3.01595	2.19522	2.49241									168.6	0.256825	0.258964	0.249094	0.264913	0.223931	0.246608		168.6	0.250056	0.0144305	0.00589123
170.7	134.689	160.857	21.7941	146.797	54.8581	-41.9742		170.7	2.89747	2.34397	2.12453	3.35293	2.13582	2.68409									170.7	2.87206	2.28368	2.08611	3.23663	2.17853	2.65034									170.7	0.262494	0.256206	0.228897	0.284296	0.222229	0.262235		170.7	0.252726	0.0232056	0.00947365
172.8	134.605	160.857	21.7704	146.472	54.881	-42.1875		172.8	2.81979	2.34919	2.10607	3.03241	2.16493	2.47632									172.8	2.79438	2.2889	2.06765	2.91611	2.20764	2.44257									172.8	0.255394	0.256792	0.226872	0.256143	0.225198	0.241677		172.8	0.243679	0.0147822	0.0060348
174.9	134.577	160.797	21.7467	146.634	54.8121	-42.157		174.9	2.79801	2.29481	2.0876	3.19889	2.10225	2.51235									174.9	2.7726	2.23452	2.04918	3.08259	2.14496	2.4786									174.9	0.253403	0.250691	0.224845	0.270766	0.218805	0.245242		174.9	0.243959	0.0192503	0.0078589
177	134.605	160.827	21.8414	146.364	54.7433	-42.0656		177	2.83203	2.32983	2.18754	2.93247	2.03966	2.60928									177	2.80662	2.26954	2.14912	2.81617	2.08237	2.57553									177	0.256513	0.25462	0.235811	0.247365	0.21242	0.254833		177	0.243593	0.0170962	0.00697948
179.1	134.689	160.946	22.0544	146.364	54.8581	-42.218		179.1	2.92195	2.45426	2.40577	2.93665	2.16067	2.46241									179.1	2.89654	2.39397	2.36735	2.82035	2.20338	2.42866									179.1	0.264731	0.26858	0.259756	0.247732	0.224764	0.240301		179.1	0.250977	0.0166598	0.00680135
181.2	134.521	160.946	21.6521	146.743	54.7662	-42.3095		181.2	2.76057	2.45948	2.00871	3.31973	2.07498	2.37644									181.2	2.73516	2.39919	1.97029	3.20343	2.11769	2.34269									181.2	0.249981	0.269166	0.216189	0.28138	0.216023	0.231795		181.2	0.244089	0.0274644	0.0112123
183.3	134.549	160.946	21.7704	146.797	54.7433	-42.218		183.3	2.79459	2.4647	2.13225	3.37801	2.0583	2.47347									183.3	2.76918	2.40441	2.09383	3.26171	2.10101	2.43972									183.3	0.253091	0.269751	0.229744	0.286499	0.214321	0.241395		183.3	0.249134	0.0263995	0.0107776
185.4	134.521	160.767	21.7941	146.743	54.7433	-42.1266		185.4	2.77281	2.29112	2.16118	3.32808	2.06451	2.57039									185.4	2.7474	2.23083	2.12276	3.21178	2.10722	2.53664									185.4	0.2511	0.250277	0.232919	0.282114	0.214955	0.250985		185.4	0.247058	0.0223677	0.00913157
187.5	134.549	160.797	21.865	146.472	54.7433	-42.157		187.5	2.80683	2.32614	2.23732	3.06166	2.07072	2.54552									187.5	2.78142	2.26585	2.1989	2.94536	2.11343	2.51177									187.5	0.254209	0.254206	0.241273	0.258712	0.215588	0.248524		187.5	0.245419	0.0157981	0.00644955
189.6	134.493	160.737	21.7704	146.743	54.6744	-42.2485		189.6	2.75715	2.27177	2.14795	3.33644	2.00803	2.45955									189.6	2.73174	2.21148	2.10953	3.22014	2.05074	2.4258									189.6	0.249669	0.248106	0.231467	0.282848	0.209193	0.240018		189.6	0.24355	0.0242545	0.00990185
191.7	134.605	160.797	21.9834	146.472	54.6284	-42.3095		191.7	2.87487	2.33659	2.36619	3.07002	1.96824	2.40408									191.7	2.84946	2.2763	2.32777	2.95372	2.01095	2.37033									191.7	0.260428	0.255378	0.255413	0.259446	0.205134	0.234529		191.7	0.245055	0.0217337	0.00887274
193.8	134.661	160.737	21.6757	146.58	54.8351	-42.0656		193.8	2.93679	2.28221	2.06373	3.1824	2.18116	2.65351									193.8	2.91138	2.22192	2.02531	3.0661	2.22387	2.61976									193.8	0.266087	0.249278	0.222226	0.269318	0.226854	0.259209		193.8	0.248829	0.0200808	0.00819794
195.9	134.577	160.886	21.7704	146.58	54.6973	-42.2485		195.9	2.85921	2.43643	2.16366	3.18658	2.04957	2.47614									195.9	2.8338	2.37614	2.12524	3.07028	2.09228	2.44239									195.9	0.258997	0.26658	0.233191	0.269685	0.213431	0.241659		195.9	0.247257	0.0218522	0.00892114
198	134.605	160.618	21.8414	146.58	54.6514	-42.218		198	2.89323	2.17346	2.2399	3.19076	2.00988	2.51217									198	2.86782	2.11317	2.20148	3.07446	2.05259	2.47842									198	0.262106	0.237077	0.241556	0.270052	0.209382	0.245224		198	0.244233	0.0212604	0.00867951
200.1	134.493	160.767	21.7231	146.689	54.8581	-42.1875		200.1	2.78775	2.32768	2.12683	3.30324	2.22279	2.5482									200.1	2.76234	2.26739	2.08841	3.18694	2.2655	2.51445									200.1	0.252466	0.254379	0.22915	0.279932	0.231101	0.248789		200.1	0.249303	0.0185021	0.00755345
202.2	134.465	160.886	21.6521	146.689	54.7892	-42.218		202.2	2.76597	2.4521	2.06107	3.30742	2.1601	2.52323									202.2	2.74056	2.39181	2.02265	3.19112	2.20281	2.48948									202.2	0.250475	0.268338	0.221934	0.280299	0.224706	0.246318		202.2	0.248678	0.0231736	0.00946059
204.3	134.521	160.916	21.9124	146.689	54.7892	-42.3399		204.3	2.82789	2.48712	2.32661	3.3116	2.16632	2.40686									204.3	2.80248	2.42683	2.28819	3.1953	2.20903	2.37311									204.3	0.256134	0.272266	0.25107	0.280666	0.22534	0.234804		204.3	0.25338	0.0211917	0.00865147
206.4	134.493	160.767	21.9124	146.526	54.6055	-42.3399		206.4	2.80611	2.34334	2.33184	3.15338	1.98883	2.41239									206.4	2.7807	2.28305	2.29342	3.03708	2.03154	2.37864									206.4	0.254144	0.256136	0.251644	0.266769	0.207235	0.235352		206.4	0.245213	0.0211881	0.00864999
208.5	134.493	161.006	21.7704	146.634	54.6514	-42.218		208.5	2.81223	2.58697	2.19508	3.26576	2.04094	2.53982									208.5	2.78682	2.52668	2.15666	3.14946	2.08365	2.50607									208.5	0.254703	0.283469	0.236638	0.27664	0.21255	0.24796		208.5	0.251993	0.0261277	0.0106666
210.6	134.465	161.006	21.7467	146.905	54.6973	-42.1875		210.6	2.79045	2.59219	2.17661	3.54064	2.09305	2.57585									210.6	2.76504	2.5319	2.13819	3.42434	2.13576	2.5421									210.6	0.252712	0.284054	0.234612	0.300784	0.217866	0.251525		210.6	0.256926	0.0307572	0.0125566
212.7	134.437	160.797	21.865	146.905	54.7892	-42.0961		212.7	2.76867	2.38881	2.30015	3.54482	2.19116	2.67278									212.7	2.74326	2.32852	2.26173	3.42852	2.23387	2.63903									212.7	0.250722	0.261237	0.248167	0.301152	0.227874	0.261116		212.7	0.258378	0.024243	0.00989715
214.8	134.521	160.708	21.7231	146.58	54.7892	-42.218		214.8	2.85849	2.30463	2.16348	3.2242	2.19738	2.55641									214.8	2.83308	2.24434	2.12506	3.1079	2.24009	2.52266									214.8	0.258931	0.251793	0.233171	0.272989	0.228509	0.249601		214.8	0.249166	0.0164472	0.00671455
216.9	134.381	160.499	21.6757	146.743	54.7433	-42.3704		216.9	2.72511	2.10125	2.12132	3.39078	2.15769	2.40954									216.9	2.6997	2.04096	2.0829	3.27448	2.2004	2.37579									216.9	0.246741	0.228976	0.228545	0.287621	0.22446	0.23507		216.9	0.241902	0.0237068	0.00967825
219	134.326	160.797	21.7467	146.689	54.6514	-42.3704		219	2.67533	2.40448	2.19756	3.34086	2.072	2.41507									219	2.64992	2.34419	2.15914	3.22456	2.11471	2.38132									219	0.242191	0.262995	0.236911	0.283236	0.215719	0.235617		219	0.246111	0.0236525	0.00965608
221.1	134.381	160.767	21.7704	146.634	54.7662	-42.1266		221.1	2.73735	2.3799	2.22649	3.29084	2.19301	2.6644									221.1	2.71194	2.31961	2.18807	3.17454	2.23572	2.63065									221.1	0.247859	0.260237	0.240085	0.278843	0.228063	0.260286		221.1	0.252562	0.0178172	0.00727383
223.2	134.326	160.797	21.7467	146.526	54.7892	-42.3399		223.2	2.68757	2.41492	2.20803	3.18682	2.22223	2.45663									223.2	2.66216	2.35463	2.16961	3.07052	2.26494	2.42288									223.2	0.24331	0.264166	0.238059	0.269706	0.231044	0.239729		223.2	0.247669	0.0155473	0.00634715
225.3	134.549	160.827	21.7231	146.689	54.7203	-42.2485		225.3	2.91699	2.44994	2.18966	3.3534	2.15954	2.55356									225.3	2.89158	2.38965	2.15124	3.2371	2.20225	2.51981									225.3	0.264278	0.268095	0.236044	0.284338	0.224649	0.249319		225.3	0.254454	0.0220422	0.00899869
227.4	134.549	160.618	21.7704	146.472	54.7892	-42.1875		227.4	2.92311	2.24657	2.2422	3.14108	2.23465	2.62009									227.4	2.8977	2.18628	2.20378	3.02478	2.27736	2.58634									227.4	0.264837	0.245279	0.241809	0.265688	0.23231	0.255902		227.4	0.250971	0.0133995	0.00547034
229.5	134.437	160.857	21.6521	146.851	54.7203	-42.1266		229.5	2.81763	2.49019	2.12914	3.52416	2.17196	2.68652									229.5	2.79222	2.4299	2.09072	3.40786	2.21467	2.65277									229.5	0.255197	0.272611	0.229403	0.299337	0.225916	0.262475		229.5	0.25749	0.0275526	0.0112483
231.6	134.353	160.886	21.6521	146.526	54.7203	-42.3095		231.6	2.73994	2.52521	2.13437	3.20354	2.17817	2.50915									231.6	2.71453	2.46492	2.09595	3.08724	2.22088	2.4754									231.6	0.248096	0.27654	0.229977	0.271174	0.226549	0.244925		231.6	0.249544	0.0206481	0.00842954
233.7	134.465	161.006	21.7704	146.959	54.6973	-42.2485		233.7	2.85776	2.64963	2.25791	3.64072	2.16139	2.57568									233.7	2.83235	2.58934	2.21949	3.52442	2.2041	2.54193									233.7	0.258864	0.290498	0.243532	0.309575	0.224837	0.251508		233.7	0.263136	0.0313364	0.012793
235.8	134.521	160.797	21.7704	146.797	54.8121	-42.2485		235.8	2.91968	2.44625	2.26314	3.4825	2.2824	2.58121									235.8	2.89427	2.38596	2.22472	3.3662	2.32511	2.54746									235.8	0.264523	0.267681	0.244106	0.295678	0.237181	0.252055		235.8	0.260204	0.0209214	0.00854111
237.9	134.577	160.767	21.8887	146.797	54.7892	-42.2485		237.9	2.9816	2.42168	2.38668	3.48668	2.26571	2.58674									237.9	2.95619	2.36139	2.34826	3.37038	2.30842	2.55299									237.9	0.270183	0.264925	0.257662	0.296045	0.235479	0.252602		237.9	0.262816	0.0202043	0.00824836
240	134.549	160.529	21.8887	146.472	54.7203	-42.3095		240	2.95982	2.1885	2.39192	3.16616	2.20302	2.53127									240	2.93441	2.12821	2.3535	3.04986	2.24573	2.49752									240	0.268192	0.238764	0.258237	0.267891	0.229084	0.247114		240	0.251547	0.0159786	0.00652324
242.1	134.493	161.065	21.7467	146.959	54.6744	-42.157		242.1	2.91014	2.73012	2.25515	3.65744	2.16333	2.6893									242.1	2.88473	2.66983	2.21673	3.54114	2.20604	2.65555									242.1	0.263652	0.299529	0.24323	0.311044	0.225035	0.26275		242.1	0.26754	0.0327157	0.0133561
244.2	134.437	160.857	21.6994	146.797	54.6973	-42.3399		244.2	2.86046	2.52674	2.21309	3.49921	2.19245	2.51193									244.2	2.83505	2.46645	2.17467	3.38291	2.23516	2.47818									244.2	0.259111	0.276711	0.238615	0.297145	0.228006	0.2452		244.2	0.257465	0.0257731	0.0105218
246.3	134.549	161.095	21.7704	146.959	54.7662	-42.3095		246.3	2.97818	2.77036	2.28932	3.66579	2.26756	2.54786									246.3	2.95277	2.71007	2.2509	3.54949	2.31027	2.51411									246.3	0.26987	0.304043	0.246979	0.311777	0.235668	0.248755		246.3	0.269515	0.0318211	0.0129909
248.4	134.437	160.946	21.6047	146.58	54.6973	-42.2485		248.4	2.8727	2.62659	2.12886	3.29107	2.20487	2.61439									248.4	2.84729	2.5663	2.09044	3.17477	2.24758	2.58064									248.4	0.26023	0.287914	0.229372	0.278863	0.229273	0.255338		248.4	0.256832	0.024408	0.00996452
250.5	134.27	160.916	21.4864	147.013	54.7662	-42.279		250.5	2.71132	2.60201	2.0158	3.72825	2.27998	2.58942									250.5	2.68591	2.54172	1.97738	3.61195	2.32269	2.55567									250.5	0.24548	0.285156	0.216967	0.317263	0.236935	0.252868		250.5	0.259111	0.0362015	0.0147792
252.6	134.353	160.797	21.6757	147.176	54.7433	-42.4619		252.6	2.80114	2.48803	2.21033	3.89483	2.2633	2.41205									252.6	2.77573	2.42774	2.17191	3.77853	2.30601	2.3783									252.6	0.253689	0.272369	0.238312	0.331895	0.235233	0.235318		252.6	0.261136	0.037542	0.0153264
254.7	134.437	160.946	21.6757	146.743	54.5596	-42.2485		254.7	2.89106	2.64225	2.21557	3.46601	2.08581	2.63098									254.7	2.86565	2.58196	2.17715	3.34971	2.12852	2.59723									254.7	0.261908	0.289671	0.238887	0.294229	0.217127	0.25698		254.7	0.2598	0.0294901	0.0120393
256.8	134.549	160.946	21.6994	146.689	54.6284	-42.0961		256.8	3.00878	2.64748	2.2445	3.41609	2.16082	2.78891									256.8	2.98337	2.58719	2.20608	3.29979	2.20353	2.75516									256.8	0.272667	0.290257	0.242061	0.289844	0.224779	0.272606		256.8	0.265369	0.0265137	0.0108242
258.9	134.521	160.678	21.5338	147.23	54.6744	-42.218		258.9	2.987	2.3845	2.08414	3.96157	2.21303	2.67254									258.9	2.96159	2.32421	2.04572	3.84527	2.25574	2.63879									258.9	0.270676	0.260754	0.224466	0.337758	0.230105	0.261092		258.9	0.264142	0.0405351	0.0165484
261	134.409	160.678	21.7467	147.013	54.6514	-42.3095		261	2.88152	2.38972	2.30227	3.74915	2.19624	2.58657									261	2.85611	2.32943	2.26385	3.63285	2.23895	2.55282									261	0.261036	0.261339	0.2484	0.319099	0.228392	0.252586		261	0.261809	0.0305436	0.0124694
263.1	134.493	160.886	21.6047	146.689	54.6973	-42.3095		263.1	2.97134	2.60354	2.16551	3.42863	2.24836	2.5921									263.1	2.94593	2.54325	2.12709	3.31233	2.29107	2.55835									263.1	0.269245	0.285328	0.233394	0.290946	0.233709	0.253133		263.1	0.260959	0.0250014	0.0102068
265.2	134.465	160.886	21.6284	147.013	54.7433	-42.3704		265.2	2.94956	2.60876	2.19445	3.75751	2.30057	2.53673									265.2	2.92415	2.54847	2.15603	3.64121	2.34328	2.50298									265.2	0.267254	0.285913	0.236569	0.319834	0.239035	0.247654		265.2	0.266043	0.0323296	0.0131985
267.3	134.493	160.737	21.6994	146.797	54.7203	-42.3704		267.3	2.98358	2.46499	2.27068	3.54519	2.28378	2.54226									267.3	2.95817	2.4047	2.23226	3.42889	2.32649	2.50851									267.3	0.270364	0.269784	0.244934	0.301184	0.237322	0.248201		267.3	0.261965	0.0234801	0.00958571
269.4	134.605	160.797	21.7231	146.472	54.6973	-42.279		269.4	3.1013	2.52981	2.29962	3.22467	2.26699	2.63919									269.4	3.07589	2.46952	2.2612	3.10837	2.3097	2.60544									269.4	0.281123	0.277056	0.248109	0.27303	0.235609	0.257792		269.4	0.26212	0.018006	0.0073509
271.5	134.661	160.797	21.6757	146.905	54.5596	-42.0351		271.5	3.16322	2.53503	2.25745	3.66185	2.1355	2.88862									271.5	3.13781	2.47474	2.21903	3.54555	2.17821	2.85487									271.5	0.286782	0.277641	0.243482	0.311431	0.222196	0.282472		271.5	0.270667	0.0322423	0.0131629
273.6	134.521	160.827	21.5101	146.851	54.8121	-42.157		273.6	3.02984	2.57005	2.09709	3.61193	2.39422	2.77225									273.6	3.00443	2.50976	2.05867	3.49563	2.43693	2.7385									273.6	0.274592	0.28157	0.225887	0.307046	0.248588	0.270957		273.6	0.268107	0.0279688	0.0114182
275.7	134.744	160.648	21.7231	146.526	54.7203	-42.157		275.7	3.25926	2.39647	2.31533	3.29131	2.30863	2.77778									275.7	3.23385	2.33618	2.27691	3.17501	2.35134	2.74403									275.7	0.29556	0.262096	0.249833	0.278884	0.239857	0.271505		275.7	0.266289	0.0201476	0.00822523
277.8	134.549	160.648	21.7231	146.689	54.8351	-42.2485		277.8	3.06998	2.4017	2.32056	3.45789	2.42964	2.69181									277.8	3.04457	2.34141	2.28214	3.34159	2.47235	2.65806									277.8	0.27826	0.262683	0.250407	0.293516	0.252201	0.262998		277.8	0.266678	0.0164818	0.00672867
279.9	134.521	160.559	21.5574	147.013	54.6744	-42.279		279.9	3.0482	2.31752	2.1601	3.78677	2.27515	2.66684									279.9	3.02279	2.25723	2.12168	3.67047	2.31786	2.63309									279.9	0.27627	0.253239	0.2328	0.322404	0.236442	0.260528		279.9	0.263614	0.0329283	0.0134429
282	134.465	160.499	21.6521	146.851	54.6744	-42.2485		282	2.99852	2.26314	2.26003	3.62865	2.28136	2.70287									282	2.97311	2.20285	2.22161	3.51235	2.32407	2.66912									282	0.271729	0.247138	0.243765	0.308515	0.237075	0.264093		282	0.262053	0.0262194	0.010704
284.1	134.409	160.737	21.7467	146.689	54.7892	-42.0046		284.1	2.94884	2.50676	2.35987	3.47043	2.40238	2.9523									284.1	2.92343	2.44647	2.32145	3.35413	2.44509	2.91855									284.1	0.267189	0.27447	0.25472	0.294617	0.24942	0.288772		284.1	0.271531	0.0180512	0.00736936
286.2	134.521	160.767	21.5574	146.905	54.6514	-42.157		286.2	3.06656	2.54179	2.17581	3.69111	2.27079	2.80543									286.2	3.04115	2.4815	2.13739	3.57481	2.3135	2.77168									286.2	0.277948	0.2784	0.234524	0.314001	0.235997	0.27424		286.2	0.269185	0.0299952	0.0122455
288.3	134.465	160.797	21.6521	146.58	54.6744	-42.4009		288.3	3.01688	2.57681	2.27574	3.37049	2.3	2.56706									288.3	2.99147	2.51652	2.23732	3.25419	2.34271	2.53331									288.3	0.273407	0.282329	0.245489	0.285839	0.238977	0.250655		288.3	0.262783	0.020196	0.00824499
290.4	134.521	160.827	21.5101	146.851	54.6284	-42.279		290.4	3.0788	2.61183	2.13898	3.64537	2.26021	2.69449									290.4	3.05339	2.55154	2.10056	3.52907	2.30292	2.66074									290.4	0.279066	0.286258	0.230483	0.309984	0.234918	0.263264		290.4	0.267329	0.03079	0.01257
292.5	134.353	160.767	21.5574	146.418	54.6514	-42.3704		292.5	2.91742	2.55745	2.19151	3.21645	2.28943	2.60862									292.5	2.89201	2.49716	2.15309	3.10015	2.33214	2.57487									292.5	0.264317	0.280157	0.236247	0.272308	0.237899	0.254767		292.5	0.257616	0.0180133	0.00735391
294.6	134.437	160.618	21.5811	146.418	54.4677	-42.3704		294.6	3.00734	2.41367	2.22045	3.22063	2.11194	2.61415									294.6	2.98193	2.35338	2.18203	3.10433	2.15465	2.5804									294.6	0.272535	0.264026	0.239422	0.272676	0.219793	0.255314		294.6	0.253961	0.0208672	0.00851902
296.7	134.521	160.857	21.6521	146.472	54.5596	-42.157		296.7	3.09716	2.6573	2.29669	3.27901	2.21005	2.83308									296.7	3.07175	2.59701	2.25827	3.16271	2.25276	2.79933									296.7	0.280744	0.291359	0.247787	0.277804	0.229801	0.276976		296.7	0.267412	0.0234537	0.00957492
298.8	134.242	160.529	21.6521	146.58	54.6514	-42.1266		298.8	2.82418	2.33472	2.30192	3.39139	2.30806	2.86901									298.8	2.79877	2.27443	2.2635	3.27509	2.35077	2.83526									298.8	0.255795	0.255169	0.248361	0.287675	0.239799	0.280531		298.8	0.261222	0.0187778	0.007666
300.9	134.465	160.588	21.6994	146.689	54.6284	-42.1875		300.9	3.0536	2.39954	2.35446	3.50387	2.29127	2.81363									300.9	3.02819	2.33925	2.31604	3.38757	2.33398	2.77988									300.9	0.276763	0.262441	0.254126	0.297555	0.238086	0.275052		300.9	0.267337	0.0205698	0.00839757
303	134.298	160.708	21.6757	146.797	54.5136	-42.218		303	2.89222	2.52396	2.33599	3.61624	2.18269	2.78866									303	2.86681	2.46367	2.29757	3.49994	2.2254	2.75491									303	0.262014	0.2764	0.2521	0.307425	0.22701	0.272581		303	0.266255	0.0268194	0.010949
305.1	134.242	160.529	21.6757	146.851	54.5825	-42.1875		305.1	2.84254	2.35038	2.34123	3.67462	2.2578	2.82469									305.1	2.81713	2.29009	2.30281	3.55832	2.30051	2.79094									305.1	0.257473	0.256926	0.252675	0.312553	0.234672	0.276146		305.1	0.265074	0.0267545	0.0109225
307.2	134.242	160.141	21.6994	146.851	54.5596	-42.279		307.2	2.84866	1.96821	2.37016	3.6788	2.24111	2.73872									307.2	2.82325	1.90792	2.33174	3.5625	2.28382	2.70497									307.2	0.258033	0.21405	0.255849	0.31292	0.232969	0.26764		307.2	0.25691	0.0336594	0.0137414
309.3	134.437	160.439	21.6757	146.743	54.6973	-42.3704		309.3	3.05018	2.27143	2.3517	3.57468	2.38502	2.65285									309.3	3.02477	2.21114	2.31328	3.45838	2.42773	2.6191									309.3	0.276451	0.248068	0.253823	0.303774	0.24765	0.259144		309.3	0.264818	0.0218234	0.00890937
311.4	134.409	160.767	21.5101	146.905	54.7662	-42.4009		311.4	3.0284	2.60445	2.19134	3.74126	2.46013	2.62788									311.4	3.00299	2.54416	2.15292	3.62496	2.50284	2.59413									311.4	0.27446	0.28543	0.236228	0.318406	0.255311	0.256673		311.4	0.271085	0.0287332	0.0117303
313.5	134.214	160.708	21.6284	147.067	54.6973	-42.3704		313.5	2.83912	2.55007	2.31487	3.90784	2.39745	2.66391									313.5	2.81371	2.48978	2.27645	3.79154	2.44016	2.63016									313.5	0.257161	0.279329	0.249782	0.333038	0.248918	0.260238		313.5	0.271411	0.0321318	0.0131178
315.6	134.493	160.529	21.5338	146.58	54.5596	-42.4619		315.6	3.12434	2.3765	2.22551	3.42482	2.26596	2.57794									315.6	3.09893	2.31621	2.18709	3.30852	2.30867	2.54419									315.6	0.283228	0.259856	0.239977	0.290611	0.235504	0.251732		315.6	0.260151	0.0225645	0.00921193
317.7	134.437	160.737	21.6521	146.743	54.4907	-42.3704		317.7	3.07466	2.59032	2.34904	3.5914	2.20327	2.67497									317.7	3.04925	2.53003	2.31062	3.4751	2.24598	2.64122									317.7	0.278688	0.283844	0.253532	0.305243	0.229109	0.261332		317.7	0.268625	0.0265189	0.0108263
319.8	134.242	160.588	21.7467	146.743	54.5136	-42.3399		319.8	2.88538	2.44654	2.44888	3.59558	2.23238	2.711									319.8	2.85997	2.38625	2.41046	3.47928	2.27509	2.67725									319.8	0.261389	0.267714	0.264486	0.30561	0.232079	0.264897		319.8	0.266029	0.0234406	0.00956958
321.9	134.353	160.439	21.6994	147.067	54.4677	-42.218		321.9	3.0031	2.30276	2.40682	3.92456	2.1927	2.83843									321.9	2.97769	2.24247	2.3684	3.80826	2.23541	2.80468									321.9	0.272148	0.251583	0.259871	0.334507	0.228031	0.277506		321.9	0.270608	0.0358413	0.0146322
324	134.437	160.678	21.6757	146.526	54.4677	-42.279		324	3.09302	2.54638	2.38835	3.38744	2.19891	2.78296									324	3.06761	2.48609	2.34993	3.27114	2.24162	2.74921									324	0.280366	0.278915	0.257845	0.287328	0.228665	0.272017		324	0.267523	0.0214978	0.00877644
326.1	134.437	160.797	21.7704	146.526	54.5596	-42.3704		326.1	3.09914	2.67081	2.48829	3.39162	2.29702	2.69709									326.1	3.07373	2.61052	2.44987	3.27532	2.33973	2.66334									326.1	0.280925	0.292875	0.268811	0.287695	0.238673	0.263521		326.1	0.272083	0.0197711	0.0080715
328.2	134.242	160.827	21.7467	147.013	54.5596	-42.4009		328.2	2.90986	2.70583	2.46982	3.8829	2.30323	2.67212									328.2	2.88445	2.64554	2.4314	3.7666	2.34594	2.63837									328.2	0.263626	0.296804	0.266784	0.330847	0.239306	0.26105		328.2	0.276403	0.0323977	0.0132263
330.3	134.381	160.588	21.6284	146.797	54.5825	-42.4009		330.3	3.05558	2.47265	2.35676	3.67058	2.33234	2.67765									330.3	3.03017	2.41236	2.31834	3.55428	2.37505	2.6439									330.3	0.276944	0.270643	0.254379	0.312198	0.242276	0.261597		330.3	0.269673	0.0241326	0.00985211
332.4	134.27	160.737	21.6284	147.013	54.5366	-42.218		332.4	2.95	2.62687	2.362	3.89126	2.29266	2.86608									332.4	2.92459	2.56658	2.32358	3.77496	2.33537	2.83233									332.4	0.267295	0.287945	0.254954	0.331582	0.238228	0.280241		332.4	0.276707	0.0322257	0.0131561
334.5	134.27	160.648	21.6521	146.58	54.5366	-42.1875		334.5	2.95612	2.54269	2.39093	3.46244	2.29887	2.90211									334.5	2.93071	2.4824	2.35251	3.34614	2.34158	2.86836									334.5	0.267854	0.278501	0.258128	0.293916	0.238861	0.283806		334.5	0.270178	0.0197474	0.00806184
336.6	134.326	160.648	21.6284	147.176	54.6055	-42.1266		336.6	3.01804	2.54792	2.37247	4.06202	2.37398	2.96854									336.6	2.99263	2.48763	2.33405	3.94572	2.41669	2.93479									336.6	0.273513	0.279088	0.256102	0.346581	0.246523	0.290379		336.6	0.282031	0.0353572	0.0144345
338.7	134.521	160.648	21.6047	147.5	54.6284	-42.3095		338.7	3.21956	2.55314	2.354	4.391	2.40309	2.79117									338.7	3.19415	2.49285	2.31558	4.2747	2.4458	2.75742									338.7	0.291931	0.279673	0.254076	0.375477	0.249493	0.272829		338.7	0.287247	0.046038	0.0187949
340.8	134.298	160.588	21.6994	146.959	54.5366	-42.4619		340.8	3.00238	2.49876	2.45394	3.85388	2.3175	2.6443									340.8	2.97697	2.43847	2.41552	3.73758	2.36021	2.61055									340.8	0.272082	0.273572	0.265042	0.328298	0.240762	0.258298		340.8	0.273009	0.0295901	0.0120801
342.9	134.298	160.678	21.5574	146.851	54.5136	-42.5533		342.9	3.0085	2.59338	2.31718	3.74986	2.30072	2.55843									342.9	2.98309	2.53309	2.27876	3.63356	2.34343	2.52468									342.9	0.272641	0.284188	0.250036	0.319162	0.23905	0.249801		342.9	0.269146	0.0296149	0.0120902
345	134.381	160.678	21.6047	146.418	54.5136	-42.4619		345	3.09842	2.59861	2.36971	3.32094	2.30693	2.65536									345	3.07301	2.53832	2.33129	3.20464	2.34964	2.62161									345	0.280859	0.284775	0.2558	0.281487	0.239684	0.259392		345	0.266999	0.0181516	0.00741034
347.1	134.186	160.737	21.6521	146.797	54.5596	-42.1875		347.1	2.90914	2.66343	2.42235	3.70402	2.35914	2.93529									347.1	2.88373	2.60314	2.38393	3.58772	2.40185	2.90154									347.1	0.26356	0.292047	0.261575	0.315135	0.24501	0.287089		347.1	0.277403	0.0253907	0.0103657
349.2	134.102	160.38	21.5338	146.743	54.6514	-42.3399		349.2	2.83156	2.31105	2.30928	3.6541	2.45715	2.78842									349.2	2.80615	2.25076	2.27086	3.5378	2.49986	2.75467									349.2	0.25647	0.252513	0.249169	0.31075	0.255007	0.272557		349.2	0.266078	0.0233341	0.00952611
351.3	134.353	160.529	21.6757	146.959	54.5136	-42.3095		351.3	3.08878	2.46527	2.45642	3.87478	2.32556	2.82435									351.3	3.06337	2.40498	2.418	3.75848	2.36827	2.7906									351.3	0.279978	0.269815	0.265314	0.330134	0.241584	0.276112		351.3	0.277156	0.0292412	0.0119377
353.4	134.326	160.708	21.6047	146.851	54.5825	-42.3095		353.4	3.067	2.64929	2.39065	3.77076	2.40068	2.82988									353.4	3.04159	2.589	2.35223	3.65446	2.44339	2.79613									353.4	0.277988	0.29046	0.258097	0.320997	0.249247	0.27666		353.4	0.278908	0.0253919	0.0103662
355.5	134.242	160.678	21.5574	146.743	54.5136	-42.3399		355.5	2.98942	2.62472	2.34859	3.66664	2.33799	2.80501									355.5	2.96401	2.56443	2.31017	3.55034	2.3807	2.77126									355.5	0.270897	0.287704	0.253482	0.311852	0.242852	0.274199		355.5	0.273498	0.0245759	0.0100331
357.6	134.298	160.797	21.6521	146.634	54.5596	-42.3704		357.6	3.05134	2.74914	2.44853	3.56252	2.3902	2.78004									357.6	3.02593	2.68885	2.41011	3.44622	2.43291	2.74629									357.6	0.276557	0.301663	0.264448	0.302706	0.248178	0.271728		357.6	0.277547	0.0213706	0.0087245
359.7	134.186	160.648	21.6994	146.797	54.6284	-42.3399		359.7	2.94586	2.60536	2.50106	3.7291	2.46521	2.81607									359.7	2.92045	2.54507	2.46264	3.6128	2.50792	2.78232									359.7	0.266916	0.285532	0.270212	0.317338	0.25583	0.275293		359.7	0.27852	0.0213773	0.00872726
361.8	134.298	160.499	21.6284	146.905	54.5596	-42.4619		361.8	3.06358	2.46158	2.4353	3.84157	2.40263	2.6996									361.8	3.03817	2.40129	2.39688	3.72527	2.44534	2.66585									361.8	0.277675	0.269401	0.262996	0.327217	0.249446	0.263769		361.8	0.275084	0.02716	0.011088
363.9	134.242	160.708	21.6047	146.905	54.6055	-42.6143		363.9	3.0139	2.6754	2.41683	3.84575	2.45474	2.55273									363.9	2.98849	2.61511	2.37841	3.72945	2.49745	2.51898									363.9	0.273135	0.29339	0.26097	0.327584	0.254762	0.249237		363.9	0.276513	0.0295405	0.0120598
366	134.298	160.678	21.4864	146.743	54.7203	-42.4619		366	3.07582	2.65083	2.30377	3.68753	2.57575	2.71066									366	3.05041	2.59054	2.26535	3.57123	2.61846	2.67691									366	0.278794	0.290633	0.248564	0.313687	0.267106	0.264863		366	0.277275	0.0227522	0.00928857
368.1	134.186	160.827	21.5101	146.689	54.7433	-42.4009		368.1	2.97034	2.80505	2.33271	3.63761	2.60496	2.77719									368.1	2.94493	2.74476	2.29429	3.52131	2.64767	2.74344									368.1	0.269154	0.307935	0.25174	0.309302	0.270085	0.271446		368.1	0.279944	0.0233525	0.00953364
370.2	134.27	160.41	21.6521	146.851	54.6055	-42.5228		370.2	3.06016	2.39307	2.47994	3.80419	2.47337	2.66082									370.2	3.03475	2.33278	2.44152	3.68789	2.51608	2.62707									370.2	0.277363	0.261715	0.267894	0.323934	0.256662	0.259932		370.2	0.274583	0.0252561	0.0103108
372.3	134.242	160.529	21.7231	146.851	54.6055	-42.4009		372.3	3.03838	2.51749	2.55618	3.80837	2.47959	2.78825									372.3	3.01297	2.4572	2.51776	3.69207	2.5223	2.7545									372.3	0.275372	0.275674	0.27626	0.324301	0.257297	0.272541		372.3	0.280241	0.0227484	0.00928699
374.4	134.326	160.588	21.5811	146.634	54.5825	-42.4009		374.4	3.1282	2.58232	2.41941	3.59595	2.4628	2.79378									374.4	3.10279	2.52203	2.38099	3.47965	2.50551	2.76003									374.4	0.283581	0.282947	0.261253	0.305643	0.255584	0.273088		374.4	0.277016	0.0180056	0.00735076
376.5	134.158	160.708	21.4391	146.797	54.4907	-42.3704		376.5	2.96692	2.70674	2.28265	3.76253	2.37721	2.82981									376.5	2.94151	2.64645	2.24423	3.64623	2.41992	2.79606									376.5	0.268841	0.296906	0.246247	0.320275	0.246853	0.276653		376.5	0.275962	0.0289266	0.0118092
378.6	134.381	160.559	21.5338	146.689	54.6973	-42.3704		378.6	3.19634	2.56296	2.38259	3.65851	2.59002	2.83534									378.6	3.17093	2.50267	2.34417	3.54221	2.63273	2.80159									378.6	0.289809	0.280775	0.257213	0.311138	0.268561	0.2772		378.6	0.280783	0.0185507	0.00757328
380.7	134.27	160.708	21.7231	146.634	54.5366	-42.3704		380.7	3.09076	2.71718	2.57712	3.60849	2.43553	2.84087									380.7	3.06535	2.65689	2.5387	3.49219	2.47824	2.80712									380.7	0.280159	0.298077	0.278558	0.306744	0.252802	0.277747		380.7	0.282348	0.0187396	0.00765041
382.8	134.242	160.499	21.6284	146.797	54.7203	-42.218		382.8	3.06898	2.5138	2.48766	3.77507	2.62545	2.9988									382.8	3.04357	2.45351	2.44924	3.65877	2.66816	2.96505									382.8	0.278169	0.27526	0.268742	0.321376	0.272176	0.293373		382.8	0.284849	0.0198168	0.00809018
384.9	134.27	160.439	21.5338	146.959	54.6514	-42.3399		384.9	3.103	2.45943	2.39829	3.94165	2.56276	2.88243									384.9	3.07759	2.39914	2.35987	3.82535	2.60547	2.84868									384.9	0.281278	0.26916	0.258935	0.336008	0.265781	0.281859		384.9	0.28217	0.0278465	0.0113683
387	134.186	160.529	21.5338	146.797	54.5825	-42.4314		387	3.02542	2.55405	2.40353	3.78343	2.50007	2.79646									387	3.00001	2.49376	2.36511	3.66713	2.54278	2.76271									387	0.274188	0.279775	0.25951	0.32211	0.259386	0.273353		387	0.278054	0.0231229	0.00943988
389.1	134.437	160.559	21.3918	146.851	54.5825	-42.5228		389.1	3.28274	2.58907	2.26677	3.84181	2.50628	2.71059									389.1	3.25733	2.52878	2.22835	3.72551	2.54899	2.67684									389.1	0.297706	0.283704	0.244505	0.327238	0.260019	0.264857		389.1	0.279671	0.0298211	0.0121744
391.2	134.353	160.41	21.3444	146.797	54.4677	-42.4924		391.2	3.20506	2.44529	2.2246	3.79179	2.3977	2.74652									391.2	3.17965	2.385	2.18618	3.67549	2.44041	2.71277									391.2	0.290606	0.267574	0.239877	0.322845	0.248943	0.268412		391.2	0.273043	0.0300692	0.0122757
393.3	134.186	160.559	21.5811	146.743	54.6284	-42.5838		393.3	3.04378	2.59951	2.46654	3.74187	2.56461	2.66065									393.3	3.01837	2.53922	2.42812	3.62557	2.60732	2.6269									393.3	0.275866	0.284876	0.266424	0.31846	0.265969	0.259915		393.3	0.278585	0.0214129	0.00874179
395.4	134.13	160.618	21.4628	146.851	54.5366	-42.4924		395.4	2.9941	2.66434	2.35347	3.85435	2.47902	2.75758									395.4	2.96869	2.60405	2.31505	3.73805	2.52173	2.72383									395.4	0.271325	0.292149	0.254018	0.32834	0.257238	0.269506		395.4	0.278763	0.0277622	0.0113339
397.5	134.214	160.469	21.4154	146.743	54.4907	-42.5838		397.5	3.08392	2.52056	2.31131	3.75023	2.43933	2.67171									397.5	3.05851	2.46027	2.27289	3.63393	2.48204	2.63796									397.5	0.279534	0.276018	0.249392	0.319194	0.25319	0.26101		397.5	0.273056	0.0256096	0.0104551
399.6	134.27	160.41	21.5101	146.797	54.5596	-42.5228		399.6	3.14584	2.46618	2.41124	3.80851	2.51444	2.73824									399.6	3.12043	2.40589	2.37282	3.69221	2.55715	2.70449									399.6	0.285193	0.269917	0.260356	0.324313	0.260852	0.267592		399.6	0.278037	0.0243954	0.00995937
401.7	134.326	160.618	21.5574	146.959	54.6744	-42.4619		401.7	3.20776	2.68	2.46378	3.97509	2.63546	2.80467									401.7	3.18235	2.61971	2.42536	3.85879	2.67817	2.77092									401.7	0.290853	0.293906	0.266121	0.338945	0.273197	0.274165		401.7	0.289531	0.0265088	0.0108222
403.8	134.242	160.588	21.5338	146.905	54.6284	-42.4924		403.8	3.13018	2.65543	2.44542	3.92517	2.59567	2.7797									403.8	3.10477	2.59514	2.407	3.80887	2.63838	2.74595									403.8	0.283762	0.291149	0.264107	0.33456	0.269138	0.271695		403.8	0.285735	0.0259133	0.0105791
405.9	134.214	160.41	21.6284	146.634	54.7662	-42.4009		405.9	3.1084	2.48185	2.54525	3.65865	2.73968	2.87673									405.9	3.08299	2.42156	2.50683	3.54235	2.78239	2.84298									405.9	0.281772	0.271675	0.275061	0.31115	0.283828	0.281295		405.9	0.28413	0.0140082	0.00571882
408	134.075	160.38	21.5338	146.58	54.6284	-42.4924		408	2.97502	2.45727	2.45589	3.60873	2.60809	2.79076									408	2.94961	2.39698	2.41747	3.49243	2.6508	2.75701									408	0.269581	0.268918	0.265256	0.306765	0.270405	0.272789		408	0.275619	0.0154535	0.00630885
410.1	134.102	160.469	21.4154	146.851	54.6973	-42.4924		410.1	3.00903	2.55189	2.34272	3.88361	2.6832	2.79629									410.1	2.98362	2.4916	2.3043	3.76731	2.72591	2.76254									410.1	0.27269	0.279533	0.252838	0.33091	0.278067	0.273336		410.1	0.281229	0.0261623	0.0106807
412.2	134.075	160.499	21.5574	146.797	54.4677	-42.3095		412.2	2.98725	2.58691	2.48996	3.83359	2.45982	2.98472									412.2	2.96184	2.52662	2.45154	3.71729	2.50253	2.95097									412.2	0.270699	0.283462	0.268994	0.326516	0.25528	0.29198		412.2	0.282822	0.0248605	0.0101493
414.3	134.13	160.559	21.6284	146.472	54.4907	-42.5533		414.3	3.04917	2.65174	2.5662	3.51307	2.48903	2.74645									414.3	3.02376	2.59145	2.52778	3.39677	2.53174	2.7127									414.3	0.276358	0.290735	0.277359	0.298363	0.258259	0.268405		414.3	0.278247	0.0145693	0.00594789
416.4	134.158	160.588	21.4628	146.58	54.5596	-42.4619		416.4	3.08319	2.68676	2.40583	3.62545	2.56414	2.84337									416.4	3.05778	2.62647	2.36741	3.50915	2.60685	2.80962									416.4	0.279468	0.294664	0.259763	0.308234	0.265921	0.277994		416.4	0.281007	0.0179897	0.00734428
418.5	134.214	160.35	21.4864	146.689	54.4907	-42.5228		418.5	3.14511	2.45358	2.43467	3.73792	2.50145	2.788									418.5	3.1197	2.39329	2.39625	3.62162	2.54416	2.75425									418.5	0.285127	0.268504	0.262927	0.318113	0.259526	0.272516		418.5	0.277785	0.0216715	0.00884736
420.6	134.298	160.648	21.4628	146.743	54.5136	-42.4314		420.6	3.23493	2.7568	2.4163	3.7962	2.53056	2.88493									420.6	3.20952	2.69651	2.37788	3.6799	2.57327	2.85118									420.6	0.293336	0.302522	0.260912	0.323232	0.262496	0.282106		420.6	0.287434	0.0240736	0.00982802
422.7	134.214	160.559	21.4864	146.851	54.5136	-42.3704		422.7	3.15735	2.67262	2.44514	3.90868	2.53678	2.95146									422.7	3.13194	2.61233	2.40672	3.79238	2.57949	2.91771									422.7	0.286245	0.293078	0.264076	0.333112	0.26313	0.288689		422.7	0.288055	0.0255157	0.0104167
424.8	134.214	160.618	21.4628	147.013	54.3758	-42.4619		424.8	3.16347	2.73745	2.42678	4.07516	2.40519	2.86549									424.8	3.13806	2.67716	2.38836	3.95886	2.4479	2.83174									424.8	0.286805	0.300351	0.262062	0.347735	0.249707	0.280183		424.8	0.287807	0.0344159	0.0140502
426.9	134.214	160.529	21.5574	146.526	54.3988	-42.4009		426.9	3.16959	2.65327	2.52661	3.59224	2.4344	2.93202									426.9	3.14418	2.59298	2.48819	3.47594	2.47711	2.89827									426.9	0.287364	0.290907	0.273015	0.305317	0.252687	0.286766		426.9	0.282676	0.017954	0.00732971
429	134.27	160.708	21.5101	146.634	54.261	-42.4619		429	3.23151	2.83729	2.48455	3.70462	2.30281	2.87655									429	3.2061	2.777	2.44613	3.58832	2.34552	2.8428									429	0.293023	0.311552	0.2684	0.315188	0.239263	0.281277		429	0.284784	0.0285014	0.0116357
431.1	134.27	160.499	21.3444	146.851	54.4447	-42.5228		431.1	3.23763	2.63391	2.32408	3.9254	2.49273	2.82118									431.1	3.21222	2.57362	2.28566	3.8091	2.53544	2.78743									431.1	0.293583	0.288735	0.250793	0.334581	0.258637	0.275799		431.1	0.283688	0.029951	0.0122274
433.2	134.353	160.648	21.5101	146.634	54.3299	-42.5838		433.2	3.32745	2.78814	2.49502	3.71298	2.38414	2.76571									433.2	3.30204	2.72785	2.4566	3.59668	2.42685	2.73196									433.2	0.301792	0.306038	0.269549	0.315922	0.24756	0.27031		433.2	0.285195	0.0265962	0.0108579
435.3	134.353	160.559	21.5338	146.634	54.3529	-42.6143		435.3	3.33357	2.70396	2.52396	3.71716	2.41335	2.74074									435.3	3.30816	2.64367	2.48554	3.60086	2.45606	2.70699									435.3	0.302351	0.296594	0.272725	0.316289	0.250539	0.26784		435.3	0.28439	0.0246778	0.0100747
437.4	134.242	160.618	21.5101	146.58	54.3758	-42.5533		437.4	3.22809	2.76878	2.50549	3.66724	2.44246	2.80727									437.4	3.20268	2.70849	2.46707	3.55094	2.48517	2.77352									437.4	0.292711	0.303866	0.270698	0.311905	0.253509	0.274422		437.4	0.284518	0.0221177	0.00902951
439.5	134.13	160.439	21.6047	146.851	54.3529	-42.6448		439.5	3.12261	2.5952	2.60533	3.94212	2.42577	2.7213									439.5	3.0972	2.53491	2.56691	3.82582	2.46848	2.68755									439.5	0.28307	0.284392	0.281653	0.336049	0.251806	0.265916		439.5	0.283815	0.0285618	0.0116603
441.6	134.102	160.708	21.4864	146.743	54.3529	-42.7057		441.6	3.10083	2.86862	2.49226	3.838	2.43199	2.66593									441.6	3.07542	2.80833	2.45384	3.7217	2.4747	2.63218									441.6	0.28108	0.315067	0.269246	0.326904	0.252441	0.260438		441.6	0.284196	0.0302754	0.0123599
443.7	134.186	160.588	21.5101	146.743	54.3299	-42.5533		443.7	3.19065	2.75465	2.5212	3.84218	2.4152	2.82386									443.7	3.16524	2.69436	2.48278	3.72588	2.45791	2.79011									443.7	0.289289	0.302281	0.272422	0.327271	0.250728	0.276064		443.7	0.286342	0.0264788	0.0108099
445.8	134.214	160.559	21.4391	146.905	54.1921	-42.4924		445.8	3.22467	2.73007	2.45543	4.00876	2.28361	2.89029									445.8	3.19926	2.66978	2.41701	3.89246	2.32632	2.85654									445.8	0.292398	0.299523	0.265205	0.341903	0.237305	0.282637		445.8	0.286495	0.0351067	0.0143323
447.9	134.27	160.559	21.5338	146.743	54.2381	-42.7057		447.9	3.28659	2.73529	2.55537	3.85054	2.33582	2.68252									447.9	3.26118	2.675	2.51695	3.73424	2.37853	2.64877									447.9	0.298057	0.300109	0.276171	0.328005	0.242631	0.262079		447.9	0.284509	0.0304802	0.0124435
450	134.465	160.41	21.5101	146.689	54.261	-42.5533		450	3.48811	2.59151	2.53691	3.80062	2.36493	2.84045									450	3.4627	2.53122	2.49849	3.68432	2.40764	2.8067									450	0.316475	0.283978	0.274145	0.32362	0.2456	0.277705		450	0.286921	0.0289293	0.0118103
452.1	134.27	160.38	21.5574	146.797	54.3758	-42.6143		452.1	3.29883	2.56693	2.58944	3.913	2.48595	2.78498									452.1	3.27342	2.50664	2.55102	3.7967	2.52866	2.75123									452.1	0.299176	0.28122	0.279909	0.333491	0.257945	0.272217		452.1	0.287327	0.0262886	0.0107323
454.2	134.102	160.29	21.6047	146.526	54.3529	-42.5228		454.2	3.13755	2.48276	2.64198	3.64658	2.46926	2.88201									454.2	3.11214	2.42247	2.60356	3.53028	2.51197	2.84826									454.2	0.284436	0.271777	0.285674	0.31009	0.256243	0.281818		454.2	0.281673	0.0177527	0.00724753
456.3	134.158	160.648	21.6047	146.689	54.3299	-42.5533		456.3	3.19947	2.84558	2.64721	3.81316	2.45247	2.85704									456.3	3.17406	2.78529	2.60879	3.69686	2.49518	2.82329									456.3	0.290095	0.312482	0.286248	0.324722	0.25453	0.279347		456.3	0.291237	0.0248498	0.0101449
458.4	134.13	160.41	21.4864	146.743	54.3529	-42.7667		458.4	3.17769	2.6124	2.53415	3.87144	2.48168	2.64917									458.4	3.15228	2.55211	2.49573	3.75514	2.52439	2.61542									458.4	0.288104	0.286322	0.273843	0.329841	0.25751	0.258779		458.4	0.2824	0.026643	0.0108769
460.5	133.991	160.41	21.6521	146.851	54.3529	-42.6448		460.5	3.04421	2.61762	2.70509	3.98392	2.48789	2.7766									460.5	3.0188	2.55733	2.66667	3.86762	2.5306	2.74285									460.5	0.275905	0.286907	0.292599	0.339721	0.258143	0.271388		460.5	0.287444	0.0283168	0.0115603
462.6	134.13	160.499	21.7231	146.743	54.4447	-42.5838		462.6	3.18993	2.71225	2.78132	3.8798	2.58591	2.84313									462.6	3.16452	2.65196	2.7429	3.7635	2.62862	2.80938									462.6	0.289223	0.297524	0.300963	0.330575	0.268142	0.277971		462.6	0.294066	0.0216657	0.00884498
464.7	134.102	160.499	21.5811	146.689	54.3758	-42.6143		464.7	3.16815	2.71747	2.64456	3.82988	2.52322	2.81816									464.7	3.14274	2.65718	2.60614	3.71358	2.56593	2.78441									464.7	0.287233	0.298109	0.285957	0.32619	0.261747	0.2755		464.7	0.289123	0.0219243	0.00895054
466.8	134.102	160.439	21.3918	146.851	54.3299	-42.7667		466.8	3.17427	2.66309	2.46049	3.99646	2.48353	2.67129									466.8	3.14886	2.6028	2.42207	3.88016	2.52624	2.63754									466.8	0.287792	0.292009	0.26576	0.340822	0.257698	0.260968		466.8	0.284175	0.0311834	0.0127306
468.9	134.158	160.618	21.4628	146.743	54.4677	-42.6448		468.9	3.23619	2.84711	2.53673	3.89234	2.62754	2.79872									468.9	3.21078	2.78682	2.49831	3.77604	2.67025	2.76497									468.9	0.293451	0.312654	0.274126	0.331677	0.272389	0.273576		468.9	0.292979	0.0246605	0.0100676
471	134.102	160.529	21.6047	146.743	54.4447	-42.5838		471	3.18651	2.76293	2.68387	3.89652	2.61076	2.86525									471	3.1611	2.70264	2.64545	3.78022	2.65347	2.8315									471	0.288911	0.30321	0.290271	0.332044	0.270677	0.280159		471	0.294212	0.0214812	0.00876968
473.1	134.019	160.439	21.5101	146.743	54.4218	-42.7362		473.1	3.10883	2.67876	2.5945	3.9007	2.59407	2.71838									473.1	3.08342	2.61847	2.55608	3.7844	2.63678	2.68463									473.1	0.281811	0.293767	0.280465	0.332411	0.268975	0.265627		473.1	0.287176	0.0243274	0.00993161
475.2	134.075	160.32	21.6757	146.689	54.3988	-42.6143		475.2	3.17085	2.56478	2.76534	3.85078	2.57728	2.84581									475.2	3.14544	2.50449	2.72692	3.73448	2.61999	2.81206									475.2	0.287479	0.280979	0.29921	0.328026	0.267262	0.278236		475.2	0.290199	0.0213248	0.0087058
477.3	134.047	160.499	21.5338	146.418	54.5366	-42.4924		477.3	3.14897	2.7488	2.62867	3.58425	2.72129	2.97324									477.3	3.12356	2.68851	2.59025	3.46795	2.764	2.93949									477.3	0.28548	0.301624	0.284214	0.304615	0.281952	0.290844		477.3	0.291455	0.0095438	0.00389624
479.4	134.13	160.439	21.3918	146.472	54.4907	-42.5228		479.4	3.23889	2.69442	2.49191	3.64263	2.6816	2.94837									479.4	3.21348	2.63413	2.45349	3.52633	2.72431	2.91462									479.4	0.293698	0.295523	0.269208	0.309743	0.277903	0.288383		479.4	0.289076	0.0142134	0.00580259
481.5	134.186	160.469	21.3444	146.472	54.3529	-42.5228		481.5	3.30081	2.72944	2.44975	3.64681	2.55002	2.9539									481.5	3.2754	2.66915	2.41133	3.53051	2.59273	2.92015									481.5	0.299357	0.299452	0.264582	0.31011	0.264481	0.288931		481.5	0.287819	0.0192417	0.00785538
483.6	134.353	160.559	21.5101	146.743	54.4218	-42.6143		483.6	3.47433	2.82407	2.62068	3.92159	2.62513	2.86793									483.6	3.44892	2.76378	2.58226	3.80529	2.66784	2.83418									483.6	0.315216	0.310069	0.283337	0.334246	0.272143	0.280424		483.6	0.299239	0.024245	0.00989797
485.7	134.102	160.38	21.4864	146.526	54.5825	-42.6448		485.7	3.22935	2.65049	2.60222	3.70927	2.79204	2.84296									485.7	3.20394	2.5902	2.5638	3.59297	2.83475	2.80921									485.7	0.292826	0.290595	0.281312	0.315596	0.289169	0.277954		485.7	0.291242	0.0132329	0.00540231
487.8	134.075	160.41	21.2971	146.634	54.5136	-42.7362		487.8	3.20757	2.68551	2.41815	3.82165	2.72935	2.75709									487.8	3.18216	2.62522	2.37973	3.70535	2.77206	2.72334									487.8	0.290835	0.294524	0.261115	0.325467	0.282774	0.269457		487.8	0.287362	0.0225651	0.00921218
489.9	134.158	160.35	21.4391	146.526	54.4677	-42.6448		489.9	3.29739	2.63113	2.56539	3.71763	2.68966	2.85402									489.9	3.27198	2.57084	2.52697	3.60133	2.73237	2.82027									489.9	0.299044	0.288423	0.27727	0.316331	0.278726	0.279048		489.9	0.289807	0.0154043	0.0062888
492	134.047	160.648	21.3918	146.526	54.3988	-42.4009		492	3.19181	2.93436	2.52332	3.72181	2.62698	3.10345									492	3.1664	2.87407	2.4849	3.60551	2.66969	3.0697									492	0.289395	0.322442	0.272654	0.316698	0.272332	0.303728		492	0.296208	0.0216143	0.00882401
494.1	134.075	160.469	21.2498	146.58	54.4447	-42.7667		494.1	3.22593	2.76078	2.38656	3.78009	2.67909	2.74318									494.1	3.20052	2.70049	2.34814	3.66379	2.7218	2.70943									494.1	0.292513	0.302968	0.257648	0.321817	0.277647	0.268081		494.1	0.286779	0.0236822	0.00966821
496.2	134.214	160.38	21.3444	146.689	54.4218	-42.6448		496.2	3.37155	2.6766	2.4864	3.89257	2.6624	2.87061									496.2	3.34614	2.61631	2.44798	3.77627	2.70511	2.83686									496.2	0.305822	0.293524	0.268603	0.331697	0.275945	0.28069		496.2	0.292714	0.0232348	0.00948555
498.3	134.102	160.439	21.3918	146.634	54.4218	-42.4619		498.3	3.26607	2.74142	2.53903	3.84255	2.66861	3.05904									498.3	3.24066	2.68113	2.50061	3.72625	2.71132	3.02529									498.3	0.296182	0.300796	0.274378	0.327303	0.276578	0.299334		498.3	0.295762	0.0192791	0.00787065
500.4	134.13	160.469	21.3444	146.743	54.5136	-42.7362		500.4	3.30009	2.77644	2.49687	3.95503	2.76663	2.79027									500.4	3.27468	2.71615	2.45845	3.83873	2.80934	2.75652									500.4	0.299291	0.304725	0.269752	0.337183	0.286577	0.27274		500.4	0.295045	0.0248849	0.0101592
502.5	134.102	160.439	21.3444	146.689	54.3529	-42.7057		502.5	3.27831	2.75187	2.5021	3.90511	2.61214	2.8263									502.5	3.2529	2.69158	2.46368	3.78881	2.65485	2.79255									502.5	0.297301	0.301969	0.270326	0.332798	0.270818	0.276305		502.5	0.291586	0.0243135	0.00992593
504.6	134.214	160.439	21.5338	146.526	54.5596	-42.5533		504.6	3.39603	2.75709	2.69674	3.74689	2.82505	2.98423									504.6	3.37062	2.6968	2.65832	3.63059	2.86776	2.95048									504.6	0.30806	0.302554	0.291683	0.318901	0.292537	0.291932		504.6	0.300944	0.0110757	0.00452163
506.7	134.075	160.38	21.3681	146.58	54.5366	-42.7057		506.7	3.26265	2.70271	2.53628	3.80517	2.80826	2.83736									506.7	3.23724	2.64242	2.49786	3.68887	2.85097	2.80361									506.7	0.295869	0.296454	0.274076	0.32402	0.290824	0.2774		506.7	0.293107	0.0178243	0.00727676
508.8	133.935	160.41	21.3444	146.634	54.3758	-42.6143		508.8	3.12917	2.73773	2.51781	3.86345	2.65367	2.93429									508.8	3.10376	2.67744	2.47939	3.74715	2.69638	2.90054									508.8	0.28367	0.300382	0.27205	0.329139	0.275054	0.28699		508.8	0.291214	0.0210975	0.00861303
510.9	134.186	160.469	21.3681	146.31	54.4218	-42.4924		510.9	3.38649	2.80255	2.54675	3.54293	2.70589	3.06172									510.9	3.36108	2.74226	2.50833	3.42663	2.7486	3.02797									510.9	0.307188	0.307655	0.275225	0.300986	0.280381	0.299599		510.9	0.295172	0.0139301	0.00568692
513	134.214	160.499	21.3681	146.201	54.4447	-42.5533		513	3.42051	2.83758	2.55198	3.43881	2.735	3.00635									513	3.3951	2.77729	2.51356	3.32251	2.77771	2.9726									513	0.310297	0.311585	0.275799	0.29184	0.283351	0.29412		513	0.294499	0.0143017	0.00583863
515.1	134.242	160.439	21.3681	146.364	54.4447	-42.7362		515.1	3.45453	2.7832	2.55722	3.60539	2.74121	2.82898									515.1	3.42912	2.72291	2.5188	3.48909	2.78392	2.79523									515.1	0.313406	0.305484	0.276374	0.306472	0.283984	0.276571		515.1	0.293715	0.0166032	0.00677821
517.2	134.13	160.529	21.3444	146.31	54.3988	-42.6448		517.2	3.34905	2.87782	2.53876	3.55547	2.70152	2.92591									517.2	3.32364	2.81753	2.50034	3.43917	2.74423	2.89216									517.2	0.303766	0.316099	0.274348	0.302087	0.279935	0.286161		517.2	0.293733	0.0160883	0.00656801
519.3	134.075	160.588	21.4154	146.147	54.3988	-42.6448		519.3	3.29937	2.94264	2.61499	3.39725	2.70773	2.93144									519.3	3.27396	2.88235	2.57657	3.28095	2.75044	2.89769									519.3	0.299225	0.323371	0.282713	0.288189	0.280569	0.286708		519.3	0.293463	0.0160186	0.00653957
521.4	134.047	160.559	21.3208	146.31	54.5825	-42.5838		521.4	3.27749	2.91807	2.52563	3.56383	2.89765	2.99797									521.4	3.25208	2.85778	2.48721	3.44753	2.94036	2.96422									521.4	0.297226	0.320615	0.272908	0.302821	0.299942	0.293291		521.4	0.297801	0.0154312	0.00629974
523.5	133.879	160.499	21.3444	146.364	54.3758	-42.7057		523.5	3.11621	2.86369	2.55446	3.62211	2.69716	2.8816									523.5	3.0908	2.8034	2.51604	3.50581	2.73987	2.84785									523.5	0.282485	0.314514	0.276071	0.30794	0.279491	0.281777		523.5	0.29038	0.0164346	0.00670938
525.6	134.13	160.32	21.2735	146.093	54.4218	-42.5228		525.6	3.37353	2.69011	2.4888	3.35569	2.74937	3.07003									525.6	3.34812	2.62982	2.45038	3.23939	2.79208	3.03628									525.6	0.306003	0.29504	0.268867	0.284539	0.284816	0.300421		525.6	0.289948	0.0133671	0.0054571
527.7	134.158	160.261	21.3918	146.039	54.4218	-42.7057		527.7	3.40755	2.63573	2.61233	3.30567	2.75558	2.89266									527.7	3.38214	2.57544	2.57391	3.18937	2.79829	2.85891									527.7	0.309113	0.288939	0.282421	0.280145	0.28545	0.282871		527.7	0.288157	0.0106968	0.00436694
529.8	133.963	160.38	21.3208	146.418	54.261	-42.9496		529.8	3.21827	2.76015	2.54657	3.68875	2.60099	2.65429									529.8	3.19286	2.69986	2.50815	3.57245	2.6437	2.62054									529.8	0.291813	0.302898	0.275205	0.313794	0.26968	0.259286		529.8	0.285446	0.0209116	0.00853713
531.9	134.019	160.38	21.3444	146.093	54.3758	-42.9496		531.9	3.28019	2.76538	2.57541	3.36823	2.72201	2.65981									531.9	3.25478	2.70509	2.53699	3.25193	2.76472	2.62606									531.9	0.297472	0.303485	0.27837	0.28564	0.282026	0.259832		531.9	0.284471	0.0153766	0.00627746
534	133.963	160.29	21.2025	145.985	54.3758	-42.7667		534	3.23051	2.6812	2.43874	3.26411	2.72822	2.84824									534	3.2051	2.62091	2.40032	3.14781	2.77093	2.81449									534	0.292932	0.29404	0.263374	0.276495	0.282659	0.278476		534	0.281329	0.0114182	0.00466144
536.1	133.823	160.38	21.2735	146.201	54.3758	-42.7362		536.1	3.09713	2.77582	2.51498	3.48478	2.73443	2.88427									536.1	3.07172	2.71553	2.47656	3.36848	2.77714	2.85052									536.1	0.280742	0.304656	0.271739	0.295878	0.283292	0.282041		536.1	0.286391	0.0118213	0.00482602
538.2	134.075	160.261	21.3208	146.418	54.4447	-42.6143		538.2	3.35445	2.66184	2.56751	3.70546	2.80954	3.0117									538.2	3.32904	2.60155	2.52909	3.58916	2.85225	2.97795									538.2	0.304259	0.291868	0.277503	0.315262	0.290954	0.29465		538.2	0.295749	0.0128479	0.00524514
540.3	134.13	160.35	21.2735	146.093	54.3988	-42.5838		540.3	3.41637	2.75646	2.52545	3.38494	2.76986	3.04773									540.3	3.39096	2.69617	2.48703	3.26864	2.81257	3.01398									540.3	0.309919	0.302484	0.272888	0.287108	0.286907	0.298214		540.3	0.29292	0.013264	0.00541501
542.4	134.047	160.35	21.1078	146.364	54.3758	-42.7362		542.4	3.33869	2.76169	2.36499	3.65972	2.75307	2.90086									542.4	3.31328	2.7014	2.32657	3.54342	2.79578	2.86711									542.4	0.302819	0.303071	0.255282	0.311244	0.285194	0.283683		542.4	0.290215	0.020271	0.0082756
544.5	133.823	160.41	21.2025	146.364	54.307	-42.6143		544.5	3.12161	2.82651	2.46492	3.6639	2.69048	3.02829									544.5	3.0962	2.76622	2.4265	3.5476	2.73319	2.99454									544.5	0.282979	0.310343	0.266246	0.311611	0.278809	0.296291		544.5	0.291047	0.0181804	0.00742212
546.6	134.047	160.35	21.3918	146.147	54.3988	-42.7667		546.6	3.35093	2.77213	2.65946	3.45158	2.78849	2.88142									546.6	3.32552	2.71184	2.62104	3.33528	2.8312	2.84767									546.6	0.303938	0.304242	0.287592	0.292962	0.288807	0.281759		546.6	0.293217	0.0091533	0.00373682
548.7	133.879	160.141	21.1788	146.201	54.4218	-42.7972		548.7	3.18965	2.56875	2.45169	3.50986	2.8177	2.85645									548.7	3.16424	2.50846	2.41327	3.39356	2.86041	2.8227									548.7	0.289198	0.281425	0.264795	0.298081	0.291787	0.279289		548.7	0.284095	0.0116922	0.0047733
550.8	134.047	160.32	21.1788	146.201	54.307	-42.7667		550.8	3.36317	2.75278	2.45693	3.51404	2.70912	2.89248									550.8	3.33776	2.69249	2.41851	3.39774	2.75183	2.85873									550.8	0.305056	0.302071	0.26537	0.298448	0.280711	0.282853		550.8	0.289085	0.0153803	0.00627896
552.9	133.963	160.32	21.2025	146.255	54.2151	-42.6752		552.9	3.28559	2.758	2.48587	3.57232	2.62343	2.98951									552.9	3.26018	2.69771	2.44745	3.45602	2.66614	2.95576									552.9	0.297966	0.302657	0.268545	0.303567	0.271969	0.292454		552.9	0.289526	0.0154777	0.00631874
555	133.991	160.38	21.1315	146.147	54.284	-42.6752		555	3.31961	2.82282	2.4201	3.4683	2.69854	2.99504									555	3.2942	2.76253	2.38168	3.352	2.74125	2.96129									555	0.301075	0.309929	0.261329	0.29443	0.279631	0.293001		555	0.289899	0.0171927	0.0070189
557.1	133.963	160.231	21.3444	146.147	54.284	-42.7362		557.1	3.29783	2.67904	2.63824	3.47248	2.70475	2.93957									557.1	3.27242	2.61875	2.59982	3.35618	2.74746	2.90582									557.1	0.299085	0.293798	0.285264	0.294797	0.280265	0.287513		557.1	0.29012	0.00697532	0.00284766
559.2	134.075	160.41	21.2498	146.093	54.1692	-42.7057		559.2	3.41565	2.86306	2.54887	3.42256	2.59616	2.9756									559.2	3.39024	2.80277	2.51045	3.30626	2.63887	2.94185									559.2	0.309853	0.314443	0.275458	0.290413	0.269188	0.291078		559.2	0.291739	0.0179968	0.00734718
561.3	133.851	160.112	21.2261	146.093	54.1921	-42.7972		561.3	3.19847	2.57029	2.53041	3.42674	2.62528	2.88963									561.3	3.17306	2.51	2.49199	3.31044	2.66799	2.85588									561.3	0.290004	0.281597	0.273432	0.29078	0.272158	0.282571		561.3	0.281757	0.00789358	0.00322254
563.4	134.019	160.231	21.2261	146.31	54.1692	-42.7667		563.4	3.37199	2.69471	2.53565	3.64742	2.60859	2.92566									563.4	3.34658	2.63442	2.49723	3.53112	2.6513	2.89191									563.4	0.305863	0.295556	0.274007	0.310164	0.270456	0.286136		563.4	0.290364	0.0163765	0.00668567
565.5	134.102	160.35	21.1788	146.201	54.261	-42.9191		565.5	3.46191	2.81913	2.49358	3.5433	2.7066	2.77879									565.5	3.4365	2.75884	2.45516	3.427	2.74931	2.74504									565.5	0.314081	0.309515	0.269391	0.301018	0.280454	0.271605		565.5	0.29101	0.0196481	0.0080213
567.6	133.991	160.29	21.2735	145.985	54.2151	-42.8581		567.6	3.35633	2.76475	2.59352	3.33098	2.66691	2.84532									567.6	3.33092	2.70446	2.5551	3.21468	2.70962	2.81157									567.6	0.304431	0.303414	0.280357	0.282368	0.276405	0.278187		567.6	0.287527	0.0128616	0.00525072
569.7	133.851	160.201	21.1078	146.364	54.1921	-42.8277		569.7	3.22295	2.68057	2.43305	3.71406	2.65013	2.88125									569.7	3.19754	2.62028	2.39463	3.59776	2.69284	2.8475									569.7	0.292241	0.29397	0.26275	0.316017	0.274693	0.281742		569.7	0.286902	0.0183585	0.00749481
571.8	134.075	160.231	21.2498	146.147	54.284	-42.8886		571.8	3.45237	2.7156	2.58029	3.50174	2.74824	2.82588									571.8	3.42696	2.65531	2.54187	3.38544	2.79095	2.79213									571.8	0.313209	0.2979	0.278905	0.297368	0.284701	0.276264		571.8	0.291391	0.0140256	0.00572591
573.9	134.13	160.35	21.1551	145.931	54.2381	-42.8581		573.9	3.51429	2.84002	2.49082	3.28942	2.70855	2.86191									573.9	3.48888	2.77973	2.4524	3.17312	2.75126	2.82816									573.9	0.318868	0.311858	0.269088	0.278718	0.280652	0.279829		573.9	0.289836	0.0203294	0.00829942
576	134.047	160.201	21.1315	145.714	54.307	-42.9801		576	3.43661	2.69624	2.47246	3.0771	2.78366	2.74544									576	3.4112	2.63595	2.43404	2.9608	2.82637	2.71169									576	0.311769	0.295728	0.267074	0.260068	0.288314	0.268305		576	0.281876	0.0200287	0.00817668
578.1	133.991	160.171	20.9895	145.876	54.2381	-43.041		578.1	3.38693	2.67166	2.3357	3.24358	2.72097	2.69007									578.1	3.36152	2.61137	2.29728	3.12728	2.76368	2.65632									578.1	0.307228	0.29297	0.252068	0.274691	0.281919	0.262826		578.1	0.278617	0.0200256	0.00817541
580.2	133.935	160.231	21.0841	145.876	54.1462	-42.8581		580.2	3.33725	2.73649	2.43553	3.24776	2.63529	2.8785									580.2	3.31184	2.6762	2.39711	3.13146	2.678	2.84475									580.2	0.302687	0.300243	0.263022	0.275059	0.273179	0.28147		580.2	0.28261	0.0157798	0.00644206
582.3	133.907	160.231	21.1078	145.66	54.1921	-42.8886		582.3	3.31547	2.74171	2.46447	3.03544	2.6874	2.85353									582.3	3.29006	2.68142	2.42605	2.91914	2.73011	2.81978									582.3	0.300697	0.300829	0.266197	0.256409	0.278495	0.279		582.3	0.280271	0.017956	0.0073305
584.4	133.991	159.903	21.1315	145.714	54.261	-43.041		584.4	3.40529	2.41913	2.4934	3.09382	2.76251	2.70666									584.4	3.37988	2.35884	2.45498	2.97752	2.80522	2.67291									584.4	0.308906	0.264639	0.269371	0.261537	0.286157	0.264468		584.4	0.275846	0.0184446	0.00752998
586.5	133.935	160.171	21.1551	145.822	54.0773	-42.8277		586.5	3.35561	2.69255	2.52224	3.2062	2.58502	2.92549									586.5	3.3302	2.63226	2.48382	3.0899	2.62773	2.89174									586.5	0.304366	0.295314	0.272536	0.271408	0.268051	0.28612		586.5	0.282966	0.0147321	0.00601434
588.6	134.019	159.992	21.1551	145.985	54.1233	-43.041		588.6	3.44542	2.51897	2.52748	3.37278	2.63723	2.71772									588.6	3.42001	2.45868	2.48906	3.25648	2.67994	2.68397									588.6	0.312574	0.27584	0.273111	0.28604	0.273377	0.265562		588.6	0.281084	0.0167784	0.00684974
590.7	133.823	159.843	21.0132	145.822	54.0544	-42.9191		590.7	3.25624	2.3752	2.39081	3.21456	2.57455	2.84515									590.7	3.23083	2.31491	2.35239	3.09826	2.61726	2.8114									590.7	0.295284	0.25971	0.258115	0.272142	0.266983	0.27817		590.7	0.271734	0.0137754	0.00562376
592.8	133.712	159.843	21.0368	146.147	54.1462	-42.9801		592.8	3.15066	2.38042	2.41965	3.54354	2.67256	2.78968									592.8	3.12525	2.32013	2.38123	3.42724	2.71527	2.75593									592.8	0.285634	0.260296	0.261279	0.301039	0.276981	0.272682		592.8	0.276319	0.0154561	0.00630993
594.9	133.795	160.052	21.0841	145.985	54.0544	-42.8277		594.9	3.24058	2.59424	2.47218	3.38531	2.58697	2.94761									594.9	3.21517	2.53395	2.43376	3.26901	2.62968	2.91386									594.9	0.293852	0.284284	0.267043	0.287141	0.26825	0.288308		594.9	0.28148	0.011163	0.00455726
597	133.823	160.022	21.1315	145.714	54.1692	-43.041		597	3.2746	2.56966	2.52482	3.11889	2.70798	2.73984									597	3.24919	2.50937	2.4864	3.00259	2.75069	2.70609									597	0.296962	0.281527	0.272819	0.263739	0.280594	0.267751		597	0.277232	0.01192	0.00486633
599.1	133.935	160.141	21.1315	145.389	54.0314	-43.0106		599.1	3.39232	2.69408	2.53006	2.79827	2.57639	2.77577									599.1	3.36691	2.63379	2.49164	2.68197	2.6191	2.74202									599.1	0.307721	0.295485	0.273394	0.235577	0.267171	0.271306		599.1	0.275109	0.0249877	0.0102012
601.2	133.935	160.082	21.1078	145.822	53.9625	-42.7972		601.2	3.39844	2.63971	2.51159	3.23545	2.51371	2.9947									601.2	3.37303	2.57942	2.47317	3.11915	2.55642	2.96095									601.2	0.30828	0.289386	0.271367	0.273977	0.260777	0.292967		601.2	0.282792	0.01726	0.00704635
603.3	133.795	159.933	21.0132	145.768	54.0544	-42.8886		603.3	3.26506	2.49593	2.42223	3.18553	2.61182	2.90883									603.3	3.23965	2.43564	2.38381	3.06923	2.65453	2.87508									603.3	0.29609	0.273255	0.261562	0.269593	0.270785	0.284471		603.3	0.275959	0.0123254	0.00503183
605.4	133.879	159.903	21.0368	145.66	54.0084	-42.9496		605.4	3.35488	2.47135	2.45106	3.08141	2.57203	2.85336									605.4	3.32947	2.41106	2.41264	2.96511	2.61474	2.81961									605.4	0.304299	0.270497	0.264726	0.260447	0.266726	0.278983		605.4	0.27428	0.0159828	0.00652496
607.5	133.768	160.261	20.9658	145.768	53.9855	-43.163		607.5	3.2494	2.83417	2.3853	3.19389	2.55534	2.64549									607.5	3.22399	2.77388	2.34688	3.07759	2.59805	2.61174									607.5	0.294658	0.311202	0.25751	0.270327	0.265024	0.258415		607.5	0.276189	0.0218672	0.00892723
609.6	133.907	159.992	20.8948	145.714	54.0773	-43.102		609.6	3.39502	2.5712	2.31954	3.14397	2.65336	2.71202									609.6	3.36961	2.51091	2.28112	3.02767	2.69607	2.67827									609.6	0.307967	0.281699	0.250295	0.265942	0.275023	0.264998		609.6	0.274321	0.0196031	0.00800292
611.7	134.019	159.992	21.0368	145.768	54.1233	-43.102		611.7	3.51274	2.57642	2.46677	3.20225	2.70557	2.71755									611.7	3.48733	2.51613	2.42835	3.08595	2.74828	2.6838									611.7	0.318726	0.282285	0.266449	0.271061	0.280349	0.265545		611.7	0.280736	0.0198711	0.00811233
613.8	133.851	160.052	21.0368	145.66	54.1462	-42.9801		613.8	3.35146	2.64124	2.47201	3.09813	2.73468	2.84498									613.8	3.32605	2.58095	2.43359	2.98183	2.77739	2.81123									613.8	0.303986	0.289557	0.267024	0.261916	0.283318	0.278154		613.8	0.280659	0.0153226	0.00625541
615.9	133.823	160.052	20.9895	145.552	54.0314	-43.041		615.9	3.32968	2.64646	2.42994	2.99411	2.62609	2.78961									615.9	3.30427	2.58617	2.39152	2.87781	2.6688	2.75586									615.9	0.301996	0.290143	0.262408	0.252779	0.272241	0.272675		615.9	0.275374	0.0180144	0.00735433
618	133.879	160.35	20.8948	145.606	54.0544	-43.041		618	3.3916	2.94968	2.34048	3.05239	2.6553	2.79514									618	3.36619	2.88939	2.30206	2.93609	2.69801	2.76139									618	0.307655	0.324161	0.252592	0.257898	0.275221	0.273222		618	0.281792	0.0282991	0.0115531
620.1	133.768	159.963	21.1078	145.335	53.9625	-43.041		620.1	3.28612	2.56751	2.55871	2.78597	2.56962	2.80067									620.1	3.26071	2.50722	2.52029	2.66967	2.61233	2.76692									620.1	0.298014	0.281285	0.276537	0.234496	0.26648	0.273769		620.1	0.271764	0.0210872	0.0086088
622.2	133.851	159.963	21.0605	145.714	54.1003	-43.102		622.2	3.37594	2.57273	2.51665	3.16905	2.71363	2.7452									622.2	3.35053	2.51244	2.47823	3.05275	2.75634	2.71145									622.2	0.306224	0.281871	0.271922	0.268145	0.281171	0.268281		622.2	0.279602	0.0143856	0.00587288
624.3	133.795	160.052	21.0368	145.281	54.0544	-42.9801		624.3	3.32626	2.66735	2.49819	2.74013	2.67394	2.87263									624.3	3.30085	2.60706	2.45977	2.62383	2.71665	2.83888									624.3	0.301683	0.292487	0.269897	0.23047	0.277122	0.280889		624.3	0.275425	0.0247582	0.0101075
626.4	133.739	160.022	21.1078	145.66	53.9396	-43.041		626.4	3.27648	2.64277	2.57442	3.12321	2.56535	2.81726									626.4	3.25107	2.58248	2.536	3.00691	2.60806	2.78351									626.4	0.297133	0.289729	0.278261	0.264119	0.266045	0.275411		626.4	0.27845	0.0129987	0.0053067
628.5	133.879	160.261	20.9895	145.389	54.0544	-43.102		628.5	3.4222	2.88639	2.46136	2.85679	2.68636	2.76179									628.5	3.39679	2.8261	2.42294	2.74049	2.72907	2.72804									628.5	0.310452	0.317061	0.265856	0.240717	0.278389	0.269922		628.5	0.280399	0.0288	0.0117575
630.6	133.768	159.814	20.8475	145.444	54.1003	-43.0715		630.6	3.31672	2.44462	2.32459	2.91507	2.73848	2.79782									630.6	3.29131	2.38433	2.28617	2.79877	2.78119	2.76407									630.6	0.300811	0.267498	0.250849	0.245836	0.283706	0.273487		630.6	0.270365	0.0205205	0.00837746
632.7	133.739	159.843	21.0605	145.552	53.9855	-43.163		632.7	3.29484	2.47964	2.54283	3.02755	2.62989	2.71185									632.7	3.26943	2.41935	2.50441	2.91125	2.6726	2.6781									632.7	0.298811	0.271427	0.274795	0.255716	0.272628	0.264981		632.7	0.27306	0.014388	0.00587389
634.8	133.712	160.022	21.0605	145.389	53.9625	-43.3459		634.8	3.27306	2.66366	2.54807	2.86933	2.6131	2.53448									634.8	3.24765	2.60337	2.50965	2.75303	2.65581	2.50073									634.8	0.296821	0.292073	0.27537	0.241818	0.270916	0.247432		634.8	0.270738	0.0225233	0.00919509
636.9	133.768	160.022	20.8475	145.606	53.8936	-43.2239		636.9	3.33508	2.66888	2.3403	3.09001	2.55041	2.66201									636.9	3.30967	2.60859	2.30188	2.97371	2.59312	2.62826									636.9	0.302489	0.292658	0.252573	0.261202	0.264521	0.26005		636.9	0.272249	0.0202422	0.00826385
639	133.739	160.141	20.8002	145.389	54.0084	-43.1934		639	3.3132	2.79331	2.29824	2.87769	2.67143	2.69804									639	3.28779	2.73302	2.25982	2.76139	2.71414	2.66429									639	0.300489	0.306618	0.247958	0.242553	0.276866	0.263615		639	0.273016	0.0266196	0.0108674
641.1	133.656	159.933	20.8712	145.498	53.9166	-43.2239		641.1	3.23562	2.58993	2.37447	2.99007	2.58584	2.67307									641.1	3.21021	2.52964	2.33605	2.87377	2.62855	2.63932									641.1	0.293399	0.283801	0.256322	0.252424	0.268135	0.261144		641.1	0.269204	0.0161993	0.00661333
643.2	133.712	159.903	20.8002	145.552	54.0084	-43.2239		643.2	3.29754	2.56535	2.30871	3.04845	2.68385	2.6786									643.2	3.27213	2.50506	2.27029	2.93215	2.72656	2.64485									643.2	0.299058	0.281043	0.249106	0.257552	0.278133	0.261691		643.2	0.271097	0.0183618	0.00749618
645.3	133.823	159.903	20.8239	145.227	53.8936	-43.3763		645.3	3.41536	2.57057	2.33765	2.72783	2.57526	2.53173									645.3	3.38995	2.51028	2.29923	2.61153	2.61797	2.49798									645.3	0.309826	0.281629	0.252282	0.22939	0.267056	0.247159		645.3	0.264557	0.0284152	0.0116004
647.4	133.656	160.022	20.8712	145.498	53.9855	-43.1325		647.4	3.25398	2.69499	2.39018	3.00261	2.67337	2.78105									647.4	3.22857	2.6347	2.35176	2.88631	2.71608	2.7473									647.4	0.295077	0.295587	0.258046	0.253525	0.277064	0.271828		647.4	0.275188	0.0178306	0.0072793
649.5	133.544	159.963	20.8712	145.281	53.9396	-43.3763		649.5	3.1485	2.64062	2.39542	2.79029	2.63369	2.54278									649.5	3.12309	2.58033	2.357	2.67399	2.6764	2.50903									649.5	0.285437	0.289488	0.258621	0.234876	0.273016	0.248253		649.5	0.264948	0.021495	0.00877529
651.6	133.544	159.605	20.8239	145.335	53.9396	-43.3763		651.6	3.15462	2.28824	2.35335	2.84867	2.6399	2.54831									651.6	3.12921	2.22795	2.31493	2.73237	2.68261	2.51456									651.6	0.285996	0.249954	0.254004	0.240004	0.27365	0.2488		651.6	0.258735	0.0174049	0.00710551
653.7	133.488	159.963	20.8002	145.444	53.9625	-43.4983		653.7	3.10494	2.65106	2.33489	2.96104	2.66901	2.43184									653.7	3.07953	2.59077	2.29647	2.84474	2.71172	2.39809									653.7	0.281455	0.290659	0.251979	0.249874	0.276619	0.237276		653.7	0.264644	0.0211204	0.00862238
655.8	133.544	159.903	20.8239	145.552	53.8936	-43.2544		655.8	3.16686	2.59668	2.36383	3.07352	2.60632	2.68127									655.8	3.14145	2.53639	2.32541	2.95722	2.64903	2.64752									655.8	0.287115	0.284558	0.255154	0.259754	0.270224	0.261956		655.8	0.269793	0.0133771	0.00546116
657.9	133.656	160.112	20.8712	145.119	54.0544	-43.4068		657.9	3.28458	2.8105	2.41636	2.6446	2.77333	2.5344									657.9	3.25917	2.75021	2.37794	2.5283	2.81604	2.50065									657.9	0.297874	0.308547	0.260918	0.222079	0.287261	0.247424		657.9	0.270684	0.0330046	0.0134741
660	133.6	159.933	20.8475	145.227	54.0544	-43.3154		660	3.2349	2.63693	2.3979	2.75708	2.77955	2.63133									660	3.20949	2.57664	2.35948	2.64078	2.82226	2.59758									660	0.293333	0.289074	0.258893	0.231959	0.287895	0.257014		660	0.269695	0.02436	0.00994494
662.1	133.46	159.992	20.8475	145.498	53.9396	-43.3154		662.1	3.10152	2.70175	2.40313	3.03186	2.67096	2.63686									662.1	3.07611	2.64146	2.36471	2.91556	2.71367	2.60311									662.1	0.281143	0.296346	0.259467	0.256095	0.276818	0.257561		662.1	0.271238	0.0162147	0.00661962
664.2	133.572	160.082	20.8002	145.173	54.1462	-43.2239		664.2	3.21924	2.79637	2.36107	2.71134	2.88377	2.73389									664.2	3.19383	2.73608	2.32265	2.59504	2.92648	2.70014									664.2	0.291902	0.306961	0.254852	0.227941	0.298526	0.267162		664.2	0.274557	0.0301379	0.0123037
666.3	133.628	159.933	20.7055	145.173	53.8247	-43.3763		666.3	3.28116	2.65259	2.2716	2.71552	2.56848	2.58702									666.3	3.25575	2.5923	2.23318	2.59922	2.61119	2.55327									666.3	0.297561	0.290831	0.245035	0.228308	0.266364	0.25263		666.3	0.263455	0.0268808	0.0109741
668.4	133.572	159.903	20.8002	145.227	53.7788	-43.3459		668.4	3.23148	2.62802	2.37154	2.7738	2.52879	2.62295									668.4	3.20607	2.56773	2.33312	2.6575	2.5715	2.5892									668.4	0.293021	0.288074	0.256	0.233427	0.262315	0.256185		668.4	0.264837	0.0222717	0.00909237
670.5	133.628	159.992	20.8239	145.444	53.8707	-43.3459		670.5	3.2934	2.72264	2.40048	2.99448	2.62691	2.62848									670.5	3.26799	2.66235	2.36206	2.87818	2.66962	2.59473									670.5	0.29868	0.29869	0.259176	0.252811	0.272324	0.256732		670.5	0.273069	0.0208957	0.00853065
672.6	133.712	159.754	20.7055	145.173	53.8018	-43.4678		672.6	3.38322	2.48946	2.28731	2.72806	2.56422	2.51211									672.6	3.35781	2.42917	2.24889	2.61176	2.60693	2.47836									672.6	0.306889	0.272529	0.246758	0.22941	0.26593	0.245218		672.6	0.261122	0.0272498	0.0111247
674.7	133.544	159.694	20.8475	145.552	53.9166	-43.4983		674.7	3.22194	2.43508	2.43455	3.11114	2.68523	2.48714									674.7	3.19653	2.37479	2.39613	2.99484	2.72794	2.45339									674.7	0.292149	0.266428	0.262914	0.263058	0.278274	0.242748		674.7	0.267595	0.0166022	0.00677782
676.8	133.628	159.933	20.8948	145.281	53.9166	-43.2239		676.8	3.31176	2.6787	2.48708	2.84462	2.69144	2.76707									676.8	3.28635	2.61841	2.44866	2.72832	2.73415	2.73332									676.8	0.300358	0.29376	0.268678	0.239648	0.278907	0.270445		676.8	0.275299	0.0215414	0.00879424
678.9	133.544	159.754	20.8475	144.956	53.9396	-43.3459		678.9	3.23418	2.50513	2.44502	2.5241	2.72066	2.6506									678.9	3.20877	2.44484	2.4066	2.4078	2.76337	2.61685									678.9	0.293267	0.274287	0.264063	0.211494	0.281888	0.258921		678.9	0.263987	0.0285132	0.0116405
681	133.572	159.814	20.8002	145.173	53.9625	-43.4068		681	3.2682	2.56995	2.40296	2.74478	2.74977	2.59523									681	3.24279	2.50966	2.36454	2.62848	2.79248	2.56148									681	0.296377	0.281559	0.259448	0.230878	0.284857	0.253442		681	0.26776	0.0242321	0.00989273
683.1	133.349	159.843	21.0132	145.065	53.8477	-43.4068		683.1	3.05102	2.60497	2.62119	2.64066	2.64118	2.60076									683.1	3.02561	2.54468	2.58277	2.52436	2.68389	2.56701									683.1	0.276527	0.285488	0.283393	0.221733	0.27378	0.25399		683.1	0.265818	0.0243199	0.00992858
685.2	133.433	159.754	20.6819	145.065	53.8247	-43.3154		685.2	3.14094	2.52079	2.29513	2.64484	2.62439	2.69769									685.2	3.11553	2.4605	2.25671	2.52854	2.6671	2.66394									685.2	0.284746	0.276044	0.247616	0.2221	0.272067	0.26358		685.2	0.261026	0.0228546	0.00933033
687.3	133.405	159.814	20.6819	145.065	53.7559	-43.4678		687.3	3.11906	2.58561	2.30036	2.64902	2.5618	2.55082									687.3	3.09365	2.52532	2.26194	2.53272	2.60451	2.51707									687.3	0.282746	0.283316	0.24819	0.222467	0.265683	0.249048		687.3	0.258575	0.0234489	0.00957297
689.4	133.237	159.694	20.8002	145.335	53.6181	-43.3154		689.4	2.95778	2.47164	2.4239	2.9239	2.43022	2.70875									689.4	2.93237	2.41135	2.38548	2.8076	2.47293	2.675									689.4	0.268006	0.27053	0.261746	0.246612	0.25226	0.264675		689.4	0.260638	0.00934419	0.00381475
691.5	133.433	159.545	20.8002	145.119	53.664	-43.4068		691.5	3.1593	2.32786	2.42914	2.71148	2.48233	2.62288									691.5	3.13389	2.26757	2.39072	2.59518	2.52504	2.58913									691.5	0.286424	0.254399	0.26232	0.227953	0.257576	0.256178		691.5	0.257475	0.0186772	0.00762492
693.6	133.488	159.635	20.7529	144.686	53.664	-43.5592		693.6	3.22122	2.42248	2.38707	2.28266	2.48854	2.47601									693.6	3.19581	2.36219	2.34865	2.16636	2.53125	2.44226									693.6	0.292083	0.265014	0.257704	0.190287	0.25821	0.241646		693.6	0.250824	0.0339249	0.0138498
695.7	133.433	159.575	20.8475	145.173	53.7559	-43.5288		695.7	3.17154	2.3681	2.48691	2.77404	2.58665	2.51194									695.7	3.14613	2.30781	2.44849	2.65774	2.62936	2.47819									695.7	0.287542	0.258914	0.268659	0.233448	0.268218	0.245201		695.7	0.26033	0.0191081	0.00780085
697.8	133.405	159.754	20.7292	144.902	53.7099	-43.4678		697.8	3.14966	2.55213	2.37384	2.50752	2.54686	2.57847									697.8	3.12425	2.49184	2.33542	2.39122	2.58957	2.54472									697.8	0.285543	0.27956	0.256253	0.210038	0.264159	0.251784		697.8	0.257889	0.0268452	0.0109595
699.9	133.405	159.814	20.6819	145.065	53.7559	-43.3154		699.9	3.15578	2.61695	2.33178	2.6741	2.59908	2.7364									699.9	3.13037	2.55666	2.29336	2.5578	2.64179	2.70265									699.9	0.286102	0.286832	0.251638	0.22467	0.269486	0.26741		699.9	0.264356	0.0234539	0.00957502
702	133.321	159.754	20.6109	144.956	53.8018	-43.5592		702	3.0782	2.56257	2.26602	2.57008	2.65119	2.49813									702	3.05279	2.50228	2.2276	2.45378	2.6939	2.46438									702	0.279011	0.280731	0.244422	0.215533	0.274801	0.243835		702	0.256389	0.0261279	0.0106667
704.1	133.433	159.814	20.8239	145.011	53.664	-43.4373		704.1	3.19602	2.62739	2.48425	2.62836	2.5196	2.62556									704.1	3.17061	2.5671	2.44583	2.51206	2.56231	2.59181									704.1	0.28978	0.288003	0.268367	0.220652	0.261378	0.256443		704.1	0.264104	0.0253091	0.0103324
706.2	133.488	159.635	20.6582	144.686	53.7559	-43.3763		706.2	3.25794	2.45381	2.32379	2.30774	2.61771	2.69209									706.2	3.23253	2.39352	2.28537	2.19144	2.66042	2.65834									706.2	0.295439	0.268529	0.250761	0.19249	0.271386	0.263026		706.2	0.256939	0.0347971	0.0142058
708.3	133.6	159.814	20.6582	144.902	53.5722	-43.3154		708.3	3.37566	2.63784	2.32902	2.52842	2.44022	2.75852									708.3	3.35025	2.57755	2.2906	2.41212	2.48293	2.72477									708.3	0.306198	0.289176	0.251335	0.211874	0.25328	0.269599		708.3	0.263577	0.0329764	0.0134625
710.4	133.265	159.784	20.5872	144.794	53.687	-43.6202		710.4	3.04688	2.61326	2.26326	2.4244	2.56124	2.45925									710.4	3.02147	2.55297	2.22484	2.3081	2.60395	2.4255									710.4	0.276149	0.286418	0.244119	0.202737	0.265626	0.239988		710.4	0.252506	0.0302824	0.0123627
712.5	133.209	159.635	20.6345	144.74	53.664	-43.6812		712.5	2.9972	2.46948	2.31579	2.37437	2.54445	2.40378									712.5	2.97179	2.40919	2.27737	2.25807	2.58716	2.37003									712.5	0.271608	0.270287	0.249883	0.198343	0.263913	0.2345		712.5	0.248089	0.0281386	0.0114876
714.6	133.377	159.426	20.6109	144.632	53.5492	-43.5897		714.6	3.17072	2.2661	2.29743	2.27035	2.43586	2.50081									714.6	3.14531	2.20581	2.25901	2.15405	2.47857	2.46706									714.6	0.287467	0.24747	0.247869	0.189206	0.252836	0.2441		714.6	0.244825	0.0316001	0.0129007
716.7	133.154	159.635	20.7055	144.956	53.664	-43.4678		716.7	2.95364	2.47992	2.39727	2.59933	2.55687	2.62824									716.7	2.92823	2.41963	2.35885	2.48303	2.59958	2.59449									716.7	0.267627	0.271459	0.258824	0.218102	0.26518	0.256709		716.7	0.256317	0.0195066	0.00796352
718.8	133.209	159.545	20.7055	144.74	53.641	-43.5897		718.8	3.01556	2.39575	2.4025	2.38691	2.54009	2.51187									718.8	2.99015	2.33546	2.36408	2.27061	2.5828	2.47812									718.8	0.273286	0.262016	0.259397	0.199444	0.263468	0.245194		718.8	0.250468	0.0265858	0.0108536
720.9	133.293	159.575	20.6819	144.74	53.7788	-43.6507		720.9	3.10538	2.43077	2.38414	2.39109	2.6841	2.4564									720.9	3.07997	2.37048	2.34572	2.27479	2.72681	2.42265									720.9	0.281496	0.265945	0.257383	0.199811	0.278158	0.239706		720.9	0.25375	0.0304438	0.0124286
723	133.126	159.605	20.7292	145.119	53.687	-43.7726		723	2.9441	2.46579	2.43667	2.77417	2.59851	2.34003									723	2.91869	2.4055	2.39825	2.65787	2.64122	2.30628									723	0.266755	0.269873	0.263147	0.23346	0.269427	0.228192		723	0.255142	0.0190602	0.00778128
725.1	133.07	159.516	20.6582	144.523	53.7099	-43.7116		725.1	2.89432	2.38161	2.37091	2.18295	2.62762	2.40656									725.1	2.86891	2.32132	2.33249	2.06665	2.67033	2.37281									725.1	0.262206	0.260429	0.255931	0.181529	0.272397	0.234775		725.1	0.244544	0.0332748	0.0135844
727.2	133.265	159.605	20.8002	144.577	53.8477	-43.5897		727.2	3.09584	2.47624	2.51815	2.24133	2.77163	2.53399									727.2	3.07043	2.41595	2.47973	2.12503	2.81434	2.50024									727.2	0.280624	0.271046	0.272087	0.186657	0.287087	0.247383		727.2	0.257481	0.0372223	0.0151959
729.3	133.265	159.575	20.5399	144.577	53.5492	-43.102		729.3	3.10196	2.45166	2.26308	2.24551	2.47935	3.02722									729.3	3.07655	2.39137	2.22466	2.12921	2.52206	2.99347									729.3	0.281183	0.268288	0.2441	0.187024	0.257272	0.296185		729.3	0.255675	0.0382108	0.0155995
731.4	133.181	159.694	20.5399	144.632	53.7329	-43.4373		731.4	3.02438	2.57608	2.26832	2.30379	2.66926	2.69745									731.4	2.99897	2.51579	2.2299	2.18749	2.71197	2.6637									731.4	0.274093	0.282247	0.244675	0.192143	0.276645	0.263556		731.4	0.25556	0.0337767	0.0137893
733.5	133.265	159.605	20.5636	144.523	53.7559	-43.6507		733.5	3.1142	2.4919	2.29725	2.19967	2.69847	2.48958									733.5	3.08879	2.43161	2.25883	2.08337	2.74118	2.45583									733.5	0.282302	0.272803	0.247849	0.182998	0.279624	0.242989		733.5	0.251427	0.0373413	0.0152445
735.6	133.265	159.426	20.5872	144.632	53.6181	-43.7116		735.6	3.12032	2.31832	2.32609	2.31215	2.56688	2.43421									735.6	3.09491	2.25803	2.28767	2.19585	2.60959	2.40046									735.6	0.282861	0.253329	0.251013	0.192877	0.266201	0.23751		735.6	0.247299	0.0307559	0.012556
737.7	133.07	159.486	20.5636	144.523	53.641	-43.5592		737.7	2.93104	2.38315	2.30773	2.20803	2.59599	2.59214									737.7	2.90563	2.32286	2.26931	2.09173	2.6387	2.55839									737.7	0.265562	0.260602	0.248999	0.183732	0.26917	0.253137		737.7	0.246867	0.0318292	0.0129942
739.8	133.154	159.545	20.5162	144.632	53.6181	-43.6202		739.8	3.02096	2.44797	2.26556	2.32051	2.57931	2.53667									739.8	2.99555	2.38768	2.22714	2.20421	2.62202	2.50292									739.8	0.27378	0.267874	0.244372	0.193612	0.267469	0.247648		739.8	0.249126	0.0296729	0.0121139
741.9	133.07	159.337	20.4452	144.09	53.6181	-43.7116		741.9	2.94328	2.24459	2.1998	1.78339	2.58552	2.4508									741.9	2.91787	2.1843	2.16138	1.66709	2.62823	2.41705									741.9	0.26668	0.245057	0.237156	0.146433	0.268102	0.239152		741.9	0.233763	0.0448496	0.0183098
744	133.07	159.396	20.4926	144.74	53.5033	-43.8031		744	2.9494	2.30941	2.25243	2.43707	2.47693	2.36483									744	2.92399	2.24912	2.21401	2.32077	2.51964	2.33108									744	0.26724	0.252329	0.242931	0.20385	0.257025	0.230646		744	0.242337	0.022601	0.0092268
746.1	133.126	159.486	20.4926	144.686	53.5722	-43.6202		746.1	3.01142	2.40403	2.25767	2.38715	2.55204	2.55326									746.1	2.98601	2.34374	2.21925	2.27085	2.59475	2.51951									746.1	0.272908	0.262945	0.243506	0.199465	0.264687	0.24929		746.1	0.2488	0.0264418	0.0107948
748.2	133.293	159.456	20.4926	144.361	53.687	-43.7726		748.2	3.18494	2.37946	2.26291	2.06653	2.67306	2.40639									748.2	3.15953	2.31917	2.22449	1.95023	2.71577	2.37264									748.2	0.288767	0.260188	0.244081	0.171303	0.277032	0.234758		748.2	0.246022	0.0417206	0.0170324
750.3	133.209	159.396	20.5872	144.415	53.5033	-43.6202		750.3	3.10736	2.32508	2.36274	2.12491	2.49557	2.56432									750.3	3.08195	2.26479	2.32432	2.00861	2.53828	2.53057									750.3	0.281677	0.254087	0.255035	0.176431	0.258927	0.250384		750.3	0.24609	0.0359054	0.0146583
752.4	133.042	159.784	20.4452	144.577	53.4344	-43.6812		752.4	2.94598	2.7177	2.22598	2.29149	2.43288	2.50885									752.4	2.92057	2.65741	2.18756	2.17519	2.47559	2.4751									752.4	0.266927	0.298135	0.240029	0.191063	0.252532	0.244896		752.4	0.24893	0.0352198	0.0143784
754.5	133.265	159.635	20.5399	144.253	53.5492	-43.6507		754.5	3.1754	2.57392	2.32591	1.97087	2.55389	2.54488									754.5	3.14999	2.51363	2.28749	1.85457	2.5966	2.51113									754.5	0.287895	0.282005	0.250994	0.1629	0.264876	0.248461		754.5	0.249522	0.045321	0.0185022
756.6	133.07	159.486	20.3979	144.036	53.4573	-43.6507		756.6	2.98612	2.43015	2.18915	1.75855	2.4682	2.55041									756.6	2.96071	2.36986	2.15073	1.64225	2.51091	2.51666									756.6	0.270596	0.265875	0.235988	0.144251	0.256135	0.249008		756.6	0.236975	0.0470663	0.0192147
758.7	133.014	159.396	20.4216	144.036	53.5033	-43.5897		758.7	2.93644	2.34597	2.21808	1.76273	2.52042	2.61694									758.7	2.91103	2.28568	2.17966	1.64643	2.56313	2.58319									758.7	0.266055	0.256431	0.239162	0.144618	0.261462	0.25559		758.7	0.23722	0.04627	0.0188896
760.8	133.265	159.456	20.5162	144.361	53.5951	-43.7116		760.8	3.19376	2.41079	2.31792	2.09161	2.61843	2.50057									760.8	3.16835	2.3505	2.2795	1.97531	2.66114	2.46682									760.8	0.289573	0.263703	0.250117	0.173506	0.271459	0.244076		760.8	0.248739	0.0402274	0.0164228
762.9	133.237	159.337	20.5636	144.253	53.3196	-43.7726		762.9	3.17198	2.29681	2.37056	1.98759	2.34914	2.44509									762.9	3.14657	2.23652	2.33214	1.87129	2.39185	2.41134									762.9	0.287583	0.250916	0.255893	0.164369	0.243989	0.238587		762.9	0.240223	0.0409231	0.0167068
765	133.293	159.545	20.5636	144.686	53.3884	-43.3763		765	3.2339	2.51063	2.37579	2.42477	2.42415	2.84692									765	3.20849	2.45034	2.33737	2.30847	2.46686	2.81317									765	0.293242	0.274904	0.256467	0.20277	0.251641	0.278346		765	0.259561	0.0316867	0.012936
767.1	133.516	159.694	20.5162	144.415	53.4573	-43.6812		767.1	3.46331	2.66486	2.33363	2.15835	2.49926	2.54755									767.1	3.4379	2.60457	2.29521	2.04205	2.54197	2.5138									767.1	0.314209	0.292207	0.251841	0.179368	0.259303	0.248725		767.1	0.257609	0.0461244	0.0188302
769.2	133.544	159.873	20.7292	144.199	53.687	-43.4983		769.2	3.49733	2.84888	2.55186	1.94603	2.73518	2.73598									769.2	3.47192	2.78859	2.51344	1.82973	2.77789	2.70223									769.2	0.317318	0.312852	0.275786	0.160719	0.283369	0.267369		769.2	0.269569	0.0569838	0.0232636
771.3	133.544	159.724	20.6345	144.415	53.687	-43.5288		771.3	3.50345	2.7051	2.4624	2.1667	2.74139	2.71101									771.3	3.47804	2.64481	2.42398	2.0504	2.7841	2.67726									771.3	0.317877	0.296722	0.26597	0.180102	0.284002	0.264898		771.3	0.268262	0.0475568	0.019415
773.4	133.377	159.873	20.7055	145.065	53.8707	-43.3459		773.4	3.34207	2.85932	2.53864	2.82038	2.9313	2.89944									773.4	3.31666	2.79903	2.50022	2.70408	2.97401	2.86569									773.4	0.303128	0.314024	0.274335	0.237519	0.303375	0.283542		773.4	0.285987	0.027832	0.0113624
775.5	133.6	159.843	20.8239	144.74	53.8936	-43.3154		775.5	3.57149	2.83475	2.66227	2.49976	2.96041	2.93547									775.5	3.54608	2.77446	2.62385	2.38346	3.00312	2.90172									775.5	0.324096	0.311267	0.287901	0.209357	0.306344	0.287107		775.5	0.287679	0.0409042	0.0166991
777.6	133.488	159.724	20.8948	145.065	53.8707	-43.3459		777.6	3.46601	2.72077	2.73841	2.82874	2.94372	2.9105									777.6	3.4406	2.66048	2.69999	2.71244	2.98643	2.87675									777.6	0.314456	0.29848	0.296255	0.238253	0.304642	0.284636		777.6	0.289454	0.0269377	0.0109973
779.7	133.795	159.754	21.0605	145.389	53.9625	-43.041		779.7	3.77913	2.75579	2.90934	3.15772	3.04174	3.22093									779.7	3.75372	2.6955	2.87092	3.04142	3.08445	3.18718									779.7	0.343073	0.302409	0.31501	0.26715	0.314641	0.315352		779.7	0.309606	0.0247466	0.0101027
781.8	133.098	159.545	20.6345	145.011	53.5951	-43.4068		781.8	3.08745	2.55241	2.48858	2.783	2.68055	2.86066									781.8	3.06204	2.49212	2.45016	2.6667	2.72326	2.82691									781.8	0.279857	0.279591	0.268843	0.234236	0.277796	0.279705		781.8	0.270005	0.0180253	0.00735881
783.9	132.651	159.098	20.1613	144.415	53.1359	-43.986		783.9	2.64707	2.11063	2.02062	2.19178	2.22756	2.28699									783.9	2.62166	2.05034	1.9822	2.07548	2.27027	2.25324									783.9	0.239608	0.230028	0.217496	0.182304	0.231587	0.222944		783.9	0.220661	0.0202611	0.00827157
786	132.484	158.949	19.9956	144.577	52.8603	-44.1689		786	2.48569	1.96686	1.86015	2.35836	1.95817	2.10962									786	2.46028	1.90657	1.82173	2.24206	2.00088	2.07587									786	0.224859	0.213898	0.199888	0.196936	0.204107	0.205394		786	0.207514	0.0102736	0.00419418
788.1	132.288	158.8	19.972	143.982	52.6536	-44.2908		788.1	2.29651	1.82308	1.84179	1.76704	1.75769	1.99325									788.1	2.2711	1.76279	1.80337	1.65074	1.8004	1.9595									788.1	0.207568	0.197768	0.197874	0.144997	0.183656	0.19388		788.1	0.187624	0.0222608	0.00908793
790.2	132.149	158.651	19.83	143.711	52.5388	-44.3823		790.2	2.16303	1.6793	1.70502	1.50062	1.6491	1.90728									790.2	2.13762	1.61901	1.6666	1.38432	1.69181	1.87353									790.2	0.195369	0.181637	0.182867	0.121595	0.172579	0.185374		790.2	0.173237	0.0263354	0.0107514
792.3	132.121	158.651	19.688	143.711	52.5618	-44.748		792.3	2.14125	1.68452	1.56826	1.5048	1.67831	1.54711									792.3	2.11584	1.62423	1.52984	1.3885	1.72102	1.51336									792.3	0.193378	0.182223	0.167861	0.121962	0.175559	0.149737		792.3	0.16512	0.0257167	0.0104988
794.4	131.87	158.651	19.6643	143.657	52.6996	-44.6871		794.4	1.89627	1.68974	1.54979	1.45488	1.82232	1.61354									794.4	1.87086	1.62945	1.51137	1.33858	1.86503	1.57979									794.4	0.170988	0.182808	0.165834	0.117577	0.190249	0.15631		794.4	0.163961	0.0257261	0.0105026
796.5	131.981	158.472	19.617	143.603	52.424	-44.6261		796.5	2.01399	1.51617	1.50773	1.40486	1.55293	1.68007									796.5	1.98858	1.45588	1.46931	1.28856	1.59564	1.64632									796.5	0.181747	0.163335	0.161219	0.113184	0.162769	0.162893		796.5	0.157525	0.0230504	0.00941027
798.6	131.981	158.443	19.4987	143.603	52.3551	-44.9614		798.6	2.02011	1.49159	1.39467	1.40904	1.49025	1.3503									798.6	1.9947	1.4313	1.35625	1.29274	1.53296	1.31655									798.6	0.182307	0.160578	0.148814	0.113551	0.156375	0.130264		798.6	0.148648	0.0241028	0.00983994
800.7	131.953	158.323	19.5224	143.603	52.4011	-44.87		800.7	1.99833	1.37761	1.4236	1.41322	1.54246	1.44723									800.7	1.97292	1.31732	1.38518	1.29692	1.58517	1.41348									800.7	0.180316	0.14779	0.151988	0.113918	0.161701	0.139855		800.7	0.149261	0.0222098	0.00906711
802.8	131.925	158.383	19.4514	143.495	52.3092	-44.809		802.8	1.97655	1.44243	1.35784	1.3092	1.45677	1.51376									802.8	1.95114	1.38214	1.31942	1.1929	1.49948	1.48001									802.8	0.178326	0.155062	0.144773	0.104781	0.15296	0.146438		802.8	0.147057	0.0239562	0.00978007
804.9	131.674	158.413	19.3094	143.062	52.2403	-44.9005		804.9	1.73147	1.47746	1.22107	0.88038	1.39408	1.42779									804.9	1.70606	1.41717	1.18265	0.764085	1.43679	1.39404									804.9	0.155926	0.158992	0.129766	0.067115	0.146565	0.137931		804.9	0.132716	0.0339422	0.0138568
807	131.702	158.502	19.3804	143.603	52.1025	-44.9614		807	1.76549	1.57208	1.29731	1.42576	1.26249	1.37242									807	1.74008	1.51179	1.25889	1.30946	1.3052	1.33867									807	0.159036	0.169608	0.138131	0.11502	0.133142	0.132453		807	0.141231	0.019806	0.00808578
809.1	131.646	158.204	19.404	143.495	52.1485	-44.9005		809.1	1.71581	1.2793	1.32615	1.32174	1.31471	1.43885									809.1	1.6904	1.21901	1.28773	1.20544	1.35742	1.4051									809.1	0.154495	0.136761	0.141296	0.105883	0.138468	0.139026		809.1	0.135988	0.016081	0.00656503
811.2	131.674	158.383	19.4514	143.17	52.1944	-44.9919		811.2	1.74983	1.46332	1.37878	1.00112	1.36682	1.35298									811.2	1.72442	1.40303	1.34036	0.884825	1.40953	1.31923									811.2	0.157604	0.157406	0.14707	0.0777204	0.143784	0.130529		811.2	0.135686	0.030113	0.0122936
813.3	131.674	158.383	19.404	142.954	52.0796	-44.809		813.3	1.75595	1.46854	1.33662	0.7888	1.25823	1.54141									813.3	1.73054	1.40825	1.2982	0.672505	1.30094	1.50766									813.3	0.158164	0.157992	0.142444	0.0590708	0.132707	0.149173		813.3	0.133259	0.0376132	0.0153555
815.4	131.563	158.264	19.2384	143.062	52.1025	-44.9005		815.4	1.65047	1.35457	1.17625	0.90128	1.28734	1.45544									815.4	1.62506	1.29428	1.13783	0.784985	1.33005	1.42169									815.4	0.148523	0.145205	0.124848	0.0689508	0.135676	0.140667		815.4	0.127312	0.0297675	0.0121525
817.5	131.535	158.174	19.1437	143.278	52.0796	-44.9614		817.5	1.62859	1.27039	1.08679	1.12196	1.27066	1.40007									817.5	1.60318	1.2101	1.04837	1.00566	1.31337	1.36632									817.5	0.146524	0.135761	0.115032	0.0883346	0.133975	0.135189		817.5	0.125803	0.0209918	0.00856986
819.6	131.339	158.174	19.1674	143.062	52.0566	-45.0833		819.6	1.43941	1.27561	1.11573	0.90964	1.25387	1.2837									819.6	1.414	1.21532	1.07731	0.793345	1.29658	1.24995									819.6	0.129233	0.136347	0.118207	0.0696851	0.132262	0.123675		819.6	0.118235	0.024627	0.0100539
821.7	131.311	158.323	19.0964	143.224	51.9648	-45.1138		821.7	1.41763	1.42983	1.04996	1.07612	1.16828	1.25873									821.7	1.39222	1.36954	1.01154	0.959825	1.21099	1.22498									821.7	0.127243	0.153649	0.110991	0.0843082	0.123531	0.121204		821.7	0.120154	0.0225989	0.00922596
823.8	131.535	158.204	19.0728	143.224	51.9877	-45.2662		823.8	1.64695	1.31585	1.0316	1.0803	1.19739	1.11186									823.8	1.62154	1.25556	0.993182	0.964005	1.2401	1.07811									823.8	0.148202	0.140861	0.108976	0.0846753	0.126501	0.106672		823.8	0.119315	0.0237359	0.00969012
825.9	131.507	158.264	19.0491	143.062	52.0336	-45.3882		825.9	1.62517	1.38068	1.01313	0.92218	1.2495	0.99539									825.9	1.59976	1.32039	0.974712	0.805885	1.29221	0.961639									825.9	0.146211	0.148135	0.10695	0.0707866	0.131816	0.0951482		825.9	0.116508	0.030838	0.0125896
828	131.423	158.234	18.9781	143.278	51.8499	-45.2358		828	1.54759	1.3561	0.94737	1.14286	1.07202	1.15332									828	1.52218	1.29581	0.908952	1.02656	1.11473	1.11957									828	0.139121	0.145377	0.0997342	0.0901704	0.113712	0.110774		828	0.116481	0.0217277	0.0088703
830.1	131.451	158.174	19.0491	142.954	51.9648	-45.1748		830.1	1.58161	1.30172	1.02361	0.82223	1.19313	1.21985									830.1	1.5562	1.24143	0.985192	0.705935	1.23584	1.1861									830.1	0.14223	0.139276	0.1081	0.0620072	0.126066	0.117357		830.1	0.115839	0.0293613	0.0119867
832.2	131.395	158.055	18.9308	142.954	51.9418	-45.2662		832.2	1.53193	1.18774	0.91054	0.82641	1.17634	1.13398									832.2	1.50652	1.12745	0.872122	0.710115	1.21905	1.10023									832.2	0.137689	0.126489	0.095693	0.0623744	0.124353	0.108861		832.2	0.109243	0.0272593	0.0111286
834.3	131.367	158.115	19.0018	143.549	51.8729	-45.2053		834.3	1.51015	1.25257	0.98678	1.42599	1.11365	1.20041									834.3	1.48474	1.19228	0.948362	1.30969	1.15636	1.16666									834.3	0.135699	0.133762	0.104058	0.11504	0.117959	0.115434		834.3	0.120325	0.012157	0.00496308
836.4	131.2	158.025	18.9781	143.062	51.7811	-45.2053		836.4	1.34877	1.16839	0.96831	0.94307	1.02806	1.20594									836.4	1.32336	1.1081	0.929892	0.826775	1.07077	1.17219									836.4	0.120949	0.124318	0.102032	0.0726215	0.109228	0.115981		836.4	0.107521	0.0188947	0.00771371
838.5	131.2	158.264	18.9071	142.791	51.7581	-45.2662		838.5	1.35489	1.41201	0.90255	0.67655	1.01128	1.15057									838.5	1.32948	1.35172	0.864132	0.560255	1.05399	1.11682									838.5	0.121509	0.15165	0.0948163	0.0492111	0.107516	0.110502		838.5	0.105867	0.0337548	0.0137803
840.6	131.256	157.906	18.8598	142.845	51.7122	-45.2967		840.6	1.41691	1.05963	0.86048	0.73483	0.97159	1.1256									840.6	1.3915	0.999339	0.822062	0.618535	1.0143	1.09185									840.6	0.127177	0.112116	0.0902002	0.0543303	0.103467	0.108032		840.6	0.0992204	0.02506	0.0102307
842.7	131.2	157.966	18.9544	143.278	51.7811	-45.2662		842.7	1.36713	1.12445	0.96032	1.17211	1.0467	1.16163									842.7	1.34172	1.06416	0.921902	1.05581	1.08941	1.12788									842.7	0.122627	0.119388	0.101155	0.0927397	0.111129	0.111597		842.7	0.109773	0.0112005	0.00457257
844.8	131.423	157.876	18.7888	142.845	51.827	-45.3272		844.8	1.59655	1.04028	0.79996	0.74319	1.09881	1.10616									844.8	1.57114	0.979989	0.761542	0.626895	1.14152	1.07241									844.8	0.143595	0.109945	0.0835597	0.0550646	0.116445	0.106108		844.8	0.102453	0.0302012	0.0123296
846.9	131.256	157.936	18.8598	142.899	51.7581	-45.4796		846.9	1.43527	1.1051	0.87619	0.80157	1.03612	0.95929									846.9	1.40986	1.04481	0.837772	0.685275	1.07883	0.925539									846.9	0.128855	0.117217	0.091924	0.0601925	0.11005	0.0915763		846.9	0.0999691	0.0242934	0.00991775
849	131.2	157.936	18.9781	143.224	51.6203	-45.1443		849	1.38549	1.11032	0.99973	1.13045	0.90454	1.30012									849	1.36008	1.05003	0.961312	1.01415	0.947245	1.26637									849	0.124305	0.117803	0.105479	0.0890804	0.0966274	0.125299		849	0.109766	0.0150742	0.00615402
851.1	131.005	157.966	18.8125	142.954	51.7351	-45.2053		851.1	1.19631	1.14534	0.83936	0.86403	1.02555	1.24465									851.1	1.1709	1.08505	0.800942	0.747735	1.06826	1.2109									851.1	0.107015	0.121732	0.0878828	0.0656788	0.108972	0.119811		851.1	0.101849	0.0214416	0.0087535
853.2	131.116	157.996	18.8361	142.954	51.7811	-45.2662		853.2	1.31403	1.18036	0.8682	0.86821	1.07776	1.18928									853.2	1.28862	1.12007	0.829782	0.751915	1.12047	1.15553									853.2	0.117774	0.125661	0.0910473	0.066046	0.114297	0.114332		853.2	0.10486	0.0222511	0.00908397
855.3	131.005	157.727	18.8834	143.008	51.7811	-45.4491		855.3	1.20855	0.91739	0.92074	0.92649	1.08397	1.01191									855.3	1.18314	0.857099	0.882322	0.810195	1.12668	0.978159									855.3	0.108134	0.0961581	0.0968122	0.0711651	0.114931	0.0967827		855.3	0.0973305	0.0149201	0.00609112
857.4	130.949	158.055	18.8361	142.845	51.9188	-45.4796		857.4	1.15887	1.25041	0.87867	0.76827	1.22789	0.98694									857.4	1.13346	1.19012	0.840252	0.651975	1.2706	0.953189									857.4	0.103593	0.13352	0.0921961	0.0572676	0.129612	0.0943121		857.4	0.10175	0.0279796	0.0114226
859.5	131.088	157.936	18.7888	142.629	51.7811	-45.3577		859.5	1.30449	1.13643	0.83661	0.55595	1.0964	1.11437									859.5	1.27908	1.07614	0.798192	0.439655	1.13911	1.08062									859.5	0.116902	0.120732	0.0875811	0.038618	0.116199	0.106921		859.5	0.0978255	0.0313669	0.0128055
861.6	130.949	157.817	18.9071	142.791	51.5744	-45.2358		861.6	1.17111	1.02245	0.96014	0.72253	0.89591	1.2418									861.6	1.1457	0.962159	0.921722	0.606235	0.938615	1.20805									861.6	0.104712	0.107945	0.101135	0.0532499	0.0957471	0.119529		861.6	0.097053	0.022889	0.00934441
863.7	130.977	157.966	18.8598	143.224	51.6203	-45.2967		863.7	1.20513	1.17668	0.91808	1.15971	0.94802	1.18643									863.7	1.17972	1.11639	0.879662	1.04341	0.990725	1.15268									863.7	0.107821	0.125248	0.0965203	0.0916505	0.101063	0.11405		863.7	0.106059	0.0123186	0.00502903
865.8	130.949	157.847	18.7888	142.845	51.5744	-45.3882		865.8	1.18335	1.0627	0.85232	0.78499	0.90833	1.10046									865.8	1.15794	1.00241	0.813902	0.668695	0.951035	1.06671									865.8	0.105831	0.11246	0.0893049	0.0587362	0.097014	0.105544		865.8	0.0948151	0.0194149	0.00792612
867.9	130.977	157.757	18.6941	142.845	51.4825	-45.5101		867.9	1.21737	0.97852	0.76285	0.78917	0.82265	0.98409									867.9	1.19196	0.918229	0.724432	0.672875	0.865355	0.950339									867.9	0.10894	0.103016	0.0794878	0.0591033	0.0882739	0.0940301		867.9	0.0888086	0.0179106	0.00731199
870	130.949	157.847	18.7415	142.845	51.5055	-45.4491		870	1.19559	1.07314	0.81549	0.79335	0.85186	1.05062									870	1.17018	1.01285	0.777072	0.677055	0.894565	1.01687									870	0.106949	0.113632	0.0852637	0.0594705	0.0912536	0.100613		870	0.0928636	0.0193144	0.00788505
872.1	130.865	157.787	18.6231	142.629	51.7351	-45.3577		872.1	1.11791	1.01876	0.70232	0.58103	1.08767	1.14755									872.1	1.0925	0.958469	0.663902	0.464735	1.13038	1.1138									872.1	0.0998497	0.107531	0.0728462	0.0408209	0.115308	0.110203		872.1	0.0910932	0.0288399	0.0117738
874.2	130.949	157.817	18.5995	142.575	51.5055	-45.5711		874.2	1.20783	1.05379	0.68396	0.53111	0.86428	0.93968									874.2	1.18242	0.993499	0.645542	0.414815	0.906985	0.905929									874.2	0.108068	0.111461	0.0708317	0.0364361	0.0925206	0.089636		874.2	0.0848255	0.0278186	0.0113569
876.3	130.949	157.847	18.8834	142.575	51.4366	-45.5406		876.3	1.21395	1.08881	0.9731	0.53529	0.80159	0.97571									876.3	1.18854	1.02852	0.934682	0.418995	0.844295	0.941959									876.3	0.108627	0.11539	0.102557	0.0368033	0.0861256	0.093201		876.3	0.0904507	0.0282957	0.0115517
878.4	130.949	157.847	18.7415	142.683	51.5744	-45.4796		878.4	1.22007	1.09403	0.83643	0.64777	0.94561	1.04223									878.4	1.19466	1.03374	0.798012	0.531475	0.988315	1.00848									878.4	0.109187	0.115975	0.0875613	0.0466832	0.100817	0.0997827		878.4	0.0933344	0.0247836	0.0101179
880.5	130.893	157.817	18.6231	142.358	51.6203	-45.5101		880.5	1.17029	1.06945	0.72327	0.32715	0.99772	1.01726									880.5	1.14488	1.00916	0.684852	0.210855	1.04043	0.983509									880.5	0.104637	0.113218	0.0751449	0.0185209	0.106133	0.0973121		880.5	0.0858275	0.0354754	0.0144828
882.6	130.865	157.876	18.6941	142.629	51.4366	-45.6625		882.6	1.14851	1.13427	0.7995	0.60193	0.82023	0.87039									882.6	1.1231	1.07398	0.761082	0.485635	0.862935	0.836639									882.6	0.102646	0.12049	0.0835092	0.0426567	0.0880271	0.0827802		882.6	0.0866849	0.0259352	0.010588
884.7	130.809	157.876	18.5995	142.683	51.3448	-45.4796		884.7	1.09883	1.1395	0.71014	0.66031	0.73464	1.05882									884.7	1.07342	1.07921	0.671722	0.544015	0.777345	1.02507									884.7	0.0981058	0.121077	0.0737043	0.0477847	0.0792961	0.101424		884.7	0.0868986	0.0255598	0.0104348
886.8	130.837	157.727	18.5522	142.629	51.4825	-45.693		886.8	1.13285	0.99572	0.66807	0.61029	0.87856	0.85095									886.8	1.10744	0.935429	0.629652	0.493995	0.921265	0.817199									886.8	0.101215	0.104946	0.0690881	0.0433911	0.0939772	0.0808567		886.8	0.0822457	0.0232272	0.00948245
888.9	130.921	157.787	18.5995	142.575	51.4596	-45.632		888.9	1.22267	1.06054	0.72061	0.56036	0.86187	0.91748									888.9	1.19726	1.00025	0.682192	0.444065	0.904575	0.883729									888.9	0.109424	0.112218	0.0748531	0.0390053	0.0922747	0.0874395		888.9	0.0858692	0.0268707	0.0109699
891	130.837	157.608	18.5758	142.412	51.3677	-45.693		891	1.14509	0.88696	0.70215	0.40214	0.77618	0.86201									891	1.11968	0.826669	0.663732	0.285845	0.818885	0.828259									891	0.102334	0.0927442	0.0728276	0.0251078	0.0835336	0.0819511		891	0.0764163	0.0270742	0.011053
893.1	130.697	157.578	18.5995	142.521	51.4825	-45.6625		893.1	1.01171	0.86239	0.73108	0.51462	0.89719	0.89804									893.1	0.9863	0.802099	0.692662	0.398325	0.939895	0.864289									893.1	0.0901435	0.0899876	0.0760019	0.0349877	0.0958777	0.085516		893.1	0.0787524	0.0224407	0.00916138
895.2	130.642	157.578	18.6468	142.521	51.3218	-45.754		895.2	0.96203	0.86761	0.78362	0.5188	0.7427	0.81207									895.2	0.93662	0.807319	0.745202	0.402505	0.785405	0.778319									895.2	0.0856029	0.0905733	0.0817668	0.0353548	0.0801183	0.0770098		895.2	0.075071	0.0200134	0.00817044
897.3	130.558	157.578	18.6468	142.899	51.3448	-45.5711		897.3	0.88435	0.87283	0.78885	0.90188	0.77192	1.0005									897.3	0.85894	0.812539	0.750432	0.785585	0.814625	0.966749									897.3	0.0785033	0.0911589	0.0823407	0.0690035	0.083099	0.0956538		897.3	0.0832932	0.00940998	0.00384161
899.4	130.753	157.578	18.5522	142.899	51.4825	-45.5711		899.4	1.08587	0.87805	0.69949	0.90606	0.91583	1.00603									899.4	1.06046	0.817759	0.661072	0.789765	0.958535	0.972279									899.4	0.0969213	0.0917445	0.0725357	0.0693706	0.0977791	0.096201		899.4	0.0874254	0.012967	0.00529376
901.5	130.781	157.34	18.3629	142.737	51.4137	-45.5406		901.5	1.11989	0.64487	0.51543	0.74784	0.85324	1.04206									901.5	1.09448	0.584579	0.477012	0.631545	0.895945	1.00831									901.5	0.100031	0.065584	0.0523398	0.055473	0.0913944	0.0997659		901.5	0.0774313	0.0221659	0.00904919
903.6	130.753	157.549	18.6231	142.629	51.2529	-45.754		903.6	1.09811	0.8587	0.78086	0.64372	0.69865	0.83419									903.6	1.0727	0.798409	0.742442	0.527425	0.741355	0.800439									903.6	0.09804	0.0895737	0.081464	0.0463274	0.0756248	0.0791984		903.6	0.0783714	0.0176463	0.00720406
905.7	130.642	157.727	18.5285	142.683	51.3448	-45.693		905.7	0.99263	1.04272	0.6915	0.7021	0.79676	0.90072									905.7	0.96722	0.982429	0.653082	0.585805	0.839465	0.866969									905.7	0.0883996	0.110219	0.071659	0.0514554	0.0856329	0.0857812		905.7	0.0821912	0.0195164	0.00796754
907.8	130.642	157.668	18.4102	142.954	51.3907	-45.8149		907.8	0.99875	0.98834	0.57843	0.97688	0.84888	0.78435									907.8	0.97334	0.928049	0.540012	0.860585	0.891585	0.750599									907.8	0.088959	0.104118	0.0592525	0.0755912	0.0909496	0.0742671		907.8	0.0821896	0.0157215	0.00641829
909.9	130.474	157.698	18.6705	142.683	51.3677	-45.8149		909.9	0.83737	1.02336	0.84397	0.71046	0.83209	0.78988									909.9	0.81196	0.963069	0.805552	0.594165	0.874795	0.756129									909.9	0.0742095	0.108047	0.0883887	0.0521897	0.0892369	0.0748143		909.9	0.0811477	0.0188056	0.00767735
912	130.474	157.519	18.4338	142.575	51.207	-45.8454		912	0.84349	0.84978	0.61251	0.60634	0.6776	0.76491									912	0.81808	0.789489	0.574092	0.490045	0.720305	0.731159									912	0.0747689	0.0885729	0.0629919	0.0430441	0.0734775	0.0723436		912	0.0691998	0.015213	0.00621068
914.1	130.446	157.519	18.4338	142.358	51.2759	-45.7235		914.1	0.82171	0.85501	0.61774	0.39402	0.75271	0.89234									914.1	0.7963	0.794719	0.579322	0.277725	0.795415	0.858589									914.1	0.0727783	0.0891597	0.0635657	0.0243945	0.0811394	0.084952		914.1	0.0693316	0.0238371	0.00973146
916.2	130.558	157.549	18.4102	142.683	51.2299	-45.8454		916.2	0.93943	0.89003	0.59938	0.723	0.71292	0.77597									916.2	0.91402	0.829739	0.560962	0.606705	0.755625	0.742219									916.2	0.0835374	0.0930886	0.0615512	0.0532912	0.0770805	0.0734379		916.2	0.0736645	0.0144796	0.00591127
918.3	130.474	157.459	18.3392	142.629	51.3218	-45.693		918.3	0.86185	0.80585	0.53361	0.67298	0.81104	0.9339									918.3	0.83644	0.745559	0.495192	0.556685	0.853745	0.900149									918.3	0.0764469	0.0836444	0.0543346	0.0488976	0.0870896	0.0890641		918.3	0.0732462	0.0173823	0.00709629
920.4	130.418	157.429	18.4102	142.629	51.2299	-45.693		920.4	0.81217	0.78127	0.60985	0.67716	0.72535	0.93943									920.4	0.78676	0.720979	0.571432	0.560865	0.768055	0.905679									920.4	0.0719064	0.0808868	0.0627	0.0492647	0.0783485	0.0896113		920.4	0.0721196	0.0143718	0.00586726
922.5	130.418	157.4	18.3629	142.521	51.2988	-45.8149		922.5	0.81829	0.7567	0.56779	0.57314	0.80046	0.82306									922.5	0.79288	0.696409	0.529372	0.456845	0.843165	0.789309									922.5	0.0724657	0.0781303	0.058085	0.0401279	0.0860103	0.0780972		922.5	0.0688194	0.0168524	0.00687998
924.6	130.363	157.549	18.4102	142.575	51.207	-45.7235		924.6	0.76861	0.91092	0.62032	0.63142	0.71487	0.91999									924.6	0.7432	0.850629	0.581902	0.515125	0.757575	0.886239									924.6	0.0679252	0.0954322	0.0638488	0.045247	0.0772794	0.0876878		924.6	0.0729034	0.0179829	0.00734148
926.7	130.279	157.608	18.3155	142.629	51.207	-45.8149		926.7	0.69093	0.97574	0.53086	0.6897	0.72109	0.83412									926.7	0.66552	0.915449	0.492442	0.573405	0.763795	0.800369									926.7	0.0608256	0.102704	0.0540329	0.0503662	0.0779139	0.0791915		926.7	0.0708391	0.0196829	0.00803549
928.8	130.279	157.608	18.1972	142.629	51.1611	-45.8759		928.8	0.69705	0.98096	0.41779	0.69388	0.6814	0.77865									928.8	0.67164	0.920669	0.379372	0.577585	0.724105	0.744899									928.8	0.0613849	0.10329	0.0416263	0.0507334	0.0738652	0.0737031		928.8	0.0674338	0.0216696	0.00884657
930.9	130.363	157.4	18.3865	142.521	51.0692	-46.1197		930.9	0.78697	0.77758	0.61233	0.58986	0.59571	0.54038									930.9	0.76156	0.717289	0.573912	0.473565	0.638415	0.506629									930.9	0.0696032	0.0804728	0.0629721	0.0415965	0.065124	0.0501278		930.9	0.0616494	0.0139016	0.0056753
933	130.446	157.489	18.3392	142.791	51.0462	-45.9673		933	0.87679	0.87221	0.57026	0.86464	0.57892	0.69831									933	0.85138	0.811919	0.531842	0.748345	0.621625	0.664559									933	0.0778124	0.0910894	0.058356	0.0657324	0.0634113	0.065754		933	0.0703592	0.0120021	0.00489984
935.1	130.474	157.459	18.2209	142.683	51.0692	-45.8454		935.1	0.91081	0.84763	0.4572	0.76062	0.60813	0.82574									935.1	0.8854	0.787339	0.418782	0.644325	0.650835	0.791989									935.1	0.0809216	0.0883317	0.0459506	0.0565956	0.066391	0.0783624		935.1	0.0694255	0.0160895	0.00656851
937.2	130.335	157.31	18.3865	142.683	51.0692	-45.8759		937.2	0.77743	0.70385	0.62804	0.7648	0.61435	0.80077									937.2	0.75202	0.643559	0.589622	0.648505	0.657055	0.767019									937.2	0.0687313	0.072201	0.0646959	0.0569628	0.0670255	0.0758917		937.2	0.0675847	0.00652864	0.00266531
939.3	130.195	157.459	18.4338	142.629	51.0922	-45.8759		939.3	0.64395	0.85807	0.68057	0.71478	0.64356	0.8063									939.3	0.61854	0.797779	0.642152	0.598485	0.686265	0.772549									939.3	0.0565318	0.089503	0.0704597	0.0525691	0.0700052	0.0764389		939.3	0.0692513	0.0134454	0.00548908
941.4	130.139	157.429	18.2682	142.466	51.1151	-45.8759		941.4	0.59427	0.83349	0.52021	0.55656	0.67267	0.81183									941.4	0.56886	0.773199	0.481792	0.440265	0.715375	0.778079									941.4	0.0519913	0.0867453	0.0528643	0.0386716	0.0729746	0.0769861		941.4	0.0633722	0.0182971	0.00746974
943.5	130.139	157.251	18.1972	142.466	51.0003	-45.9369		943.5	0.60039	0.65992	0.45444	0.56074	0.56408	0.75636									943.5	0.57498	0.599629	0.416022	0.444445	0.606785	0.722609									943.5	0.0525506	0.0672725	0.0456477	0.0390387	0.0618975	0.0714977		943.5	0.0563175	0.0127136	0.00519029
945.6	130.139	157.4	18.2445	142.575	51.0462	-45.7235		945.6	0.6065	0.81414	0.50698	0.67321	0.61619	0.97529									945.6	0.58109	0.753849	0.468562	0.556915	0.658895	0.941539									945.6	0.0531091	0.0845745	0.0514126	0.0489178	0.0672132	0.0931594		945.6	0.0663978	0.0187293	0.00764621
947.7	130.056	157.161	18.3155	142.629	51.1151	-45.9064		947.7	0.52892	0.58096	0.58322	0.73149	0.69131	0.79792									947.7	0.50351	0.520669	0.544802	0.615195	0.734015	0.764169									947.7	0.0460186	0.0584139	0.059778	0.0540369	0.0748761	0.0756098		947.7	0.0614556	0.011712	0.0047814
949.8	130.279	157.251	18.1972	142.629	50.9774	-46.0588		949.8	0.75824	0.67558	0.47015	0.73567	0.55982	0.65105									949.8	0.73283	0.615289	0.431732	0.619375	0.602525	0.617299									949.8	0.0669774	0.0690294	0.0473715	0.0544041	0.0614629	0.0610779		949.8	0.0600539	0.00805348	0.00328782
951.9	130.028	157.251	18.2682	142.629	50.9314	-46.1197		951.9	0.51326	0.68081	0.54639	0.73985	0.52003	0.59568									951.9	0.48785	0.620519	0.507972	0.623555	0.562735	0.561929									951.9	0.0445873	0.0696161	0.0557369	0.0547712	0.057404	0.0555994		951.9	0.0562858	0.00798585	0.00326021
954	130.056	157.37	18.1972	142.791	51.0233	-46.1502		954	0.54728	0.80523	0.48062	0.90643	0.61814	0.57071									954	0.52187	0.744939	0.442202	0.790135	0.660845	0.536959									954	0.0476966	0.0835749	0.0485203	0.0694031	0.0674121	0.0531287		954	0.0616226	0.0142387	0.00581293
956.1	130.195	157.34	18.1026	142.412	50.8166	-46.3026		956.1	0.6929	0.78065	0.39126	0.53171	0.41766	0.42384									956.1	0.66749	0.720359	0.352842	0.415415	0.460365	0.390089									956.1	0.0610056	0.0808172	0.0387153	0.0364888	0.0469613	0.0385969		956.1	0.0504309	0.0174291	0.00711541
958.2	130.251	157.28	18.1972	142.25	50.8855	-46.2112		958.2	0.75482	0.72627	0.4911	0.37349	0.49277	0.52077									958.2	0.72941	0.665979	0.452682	0.257195	0.535475	0.487019									958.2	0.0666648	0.0747163	0.0496702	0.0225912	0.0546232	0.0481875		958.2	0.0527422	0.0179972	0.00734734
960.3	130.111	157.28	18.2682	142.466	50.8396	-46.3331		960.3	0.62144	0.73149	0.56733	0.59417	0.45308	0.4044									960.3	0.59603	0.671199	0.528912	0.477875	0.495785	0.370649									960.3	0.0544745	0.0753019	0.0580345	0.0419751	0.0505745	0.0366734		960.3	0.052839	0.0135553	0.00553393
962.4	130.083	157.131	18.1972	142.412	50.8855	-46.2112		962.4	0.59966	0.58772	0.50157	0.54425	0.50519	0.53183									962.4	0.57425	0.527429	0.463152	0.427955	0.547895	0.498079									962.4	0.0524839	0.0591724	0.050819	0.0375903	0.0558902	0.0492818		962.4	0.0508729	0.00742444	0.00303102
964.5	130.195	157.102	17.9842	142.358	50.8166	-46.1807		964.5	0.71738	0.56324	0.2938	0.49433	0.4425	0.56786									964.5	0.69197	0.502949	0.255382	0.378035	0.485205	0.534109									964.5	0.063243	0.0564259	0.0280216	0.0332055	0.0494952	0.0528468		964.5	0.0472063	0.0137354	0.00560746
966.6	130.056	157.608	18.1972	142.466	50.7018	-46.2417		966.6	0.584	1.07496	0.51204	0.60671	0.33392	0.51239									966.6	0.55859	1.01467	0.473622	0.490415	0.376625	0.478639									966.6	0.0510527	0.113836	0.0519679	0.0430766	0.0384191	0.0473583		966.6	0.0576184	0.0280028	0.0114321
968.7	130	157.161	18.1026	142.521	50.8396	-46.1502		968.7	0.53432	0.63318	0.42268	0.66509	0.47793	0.60942									968.7	0.50891	0.572889	0.384262	0.548795	0.520635	0.575669									968.7	0.0465121	0.0642725	0.0421629	0.0482045	0.0531094	0.0569589		968.7	0.0518701	0.00797027	0.00325385
970.8	130.111	157.102	18.1262	142.466	51.0003	-46.1807		970.8	0.65204	0.5789	0.45151	0.61507	0.64484	0.58445									970.8	0.62663	0.518609	0.413092	0.498775	0.687545	0.550699									970.8	0.0572712	0.0581828	0.0453262	0.0438109	0.0701357	0.0544882		970.8	0.0548692	0.00962617	0.00392987
972.9	130.167	157.34	18.1026	142.196	50.7477	-46.3636		972.9	0.71396	0.82243	0.43315	0.34865	0.39845	0.40708									972.9	0.68855	0.762139	0.394732	0.232355	0.441155	0.373329									972.9	0.0629304	0.0855045	0.0433117	0.0204094	0.0450018	0.0369386		972.9	0.0490161	0.0225295	0.00919761
975	130.111	157.102	17.9132	142.412	50.7018	-46.2722		975	0.66428	0.58935	0.24898	0.56933	0.35876	0.50401									975	0.63887	0.529059	0.210562	0.453035	0.401465	0.470259									975	0.0583899	0.0593552	0.0231038	0.0397932	0.040953	0.0465292		975	0.0446874	0.0134911	0.00550771
977.1	130.139	156.953	18.1026	142.088	50.7477	-46.2722		977.1	0.6983	0.44557	0.44362	0.24871	0.41088	0.50954									977.1	0.67289	0.385279	0.405202	0.132415	0.453585	0.475789									977.1	0.0614992	0.0432245	0.0444605	0.0116309	0.0462697	0.0470763		977.1	0.0423602	0.0164516	0.00671633
979.2	130.056	156.953	18.1499	142.033	50.7937	-46.4246		979.2	0.62072	0.45079	0.49615	0.19879	0.46309	0.36267									979.2	0.59531	0.390499	0.457732	0.0824948	0.505795	0.328919									979.2	0.0544087	0.0438101	0.0502243	0.0072461	0.0515956	0.0325445		979.2	0.0399716	0.0178299	0.00727901
981.3	129.972	156.744	18.1735	142.304	50.7707	-46.3941		981.3	0.54304	0.24742	0.52499	0.47367	0.4463	0.3987									981.3	0.51763	0.187129	0.486572	0.357375	0.489005	0.364949									981.3	0.0473091	0.020994	0.0533888	0.0313908	0.0498829	0.0361094		981.3	0.0398458	0.0124956	0.00510129
983.4	130	157.072	17.9842	141.979	50.8625	-46.3636		983.4	0.57716	0.58044	0.34093	0.15305	0.54431	0.43473									983.4	0.55175	0.520149	0.302512	0.0367548	0.587015	0.400979									983.4	0.0504275	0.0583556	0.0331929	0.00322844	0.0598808	0.0396744		983.4	0.0407933	0.0211458	0.00863273
985.5	130.028	156.983	18.0789	142.088	50.7707	-46.2722		985.5	0.61118	0.49626	0.44086	0.26543	0.45872	0.53166									985.5	0.58577	0.435969	0.402442	0.149135	0.501425	0.497909									985.5	0.0535368	0.0489114	0.0441577	0.0130996	0.0511498	0.049265		985.5	0.0433534	0.0151411	0.00618133
987.6	129.944	157.28	18.0552	142.142	50.7477	-46.3026		987.6	0.5335	0.79938	0.4224	0.32381	0.44194	0.50679									987.6	0.50809	0.739089	0.383982	0.207515	0.484645	0.473039									987.6	0.0464372	0.0829185	0.0421322	0.0182275	0.0494381	0.0468043		987.6	0.0476596	0.0207142	0.00845652
989.7	129.832	157.012	17.9606	142.304	50.61	-46.3636		989.7	0.42802	0.5365	0.33303	0.49039	0.31045	0.45132									989.7	0.40261	0.476209	0.294612	0.374095	0.353155	0.417569									989.7	0.0367968	0.053426	0.0323261	0.0328594	0.036025	0.0413158		989.7	0.0387915	0.00786339	0.00321021
991.8	129.916	156.983	17.9132	142.25	50.4951	-46.4551		991.8	0.51784	0.51193	0.29087	0.44037	0.20176	0.36535									991.8	0.49243	0.451639	0.252452	0.324075	0.244465	0.331599									991.8	0.0450059	0.0506695	0.0277001	0.0284658	0.0249376	0.0328096		991.8	0.0349314	0.0104657	0.00427261
993.9	129.888	156.804	18.0079	142.033	50.4951	-46.4246		993.9	0.49606	0.33835	0.39081	0.22805	0.20797	0.40137									993.9	0.47065	0.278059	0.352392	0.111755	0.250675	0.367619									993.9	0.0430153	0.0311955	0.038666	0.00981622	0.0255711	0.0363736		993.9	0.0307729	0.0119161	0.00486472
996	129.832	157.072	18.0316	142.033	50.587	-46.4855		996	0.44638	0.61177	0.41974	0.23223	0.30609	0.346									996	0.42097	0.551479	0.381322	0.115935	0.348795	0.312249									996	0.0384748	0.0618705	0.0418403	0.0101834	0.0355802	0.0308951		996	0.036474	0.0167386	0.00683351
998.1	129.916	156.834	17.9132	142.142	50.6559	-46.516		998.1	0.5362	0.37859	0.30658	0.34471	0.3812	0.32103									998.1	0.51079	0.318299	0.268162	0.228415	0.423905	0.287279									998.1	0.0466839	0.03571	0.0294239	0.0200633	0.0432421	0.0284245		998.1	0.0339246	0.00995438	0.00406386
1000.2	129.693	156.863	17.8659	142.196	50.4722	-46.577		1000.2	0.31912	0.41361	0.26451	0.40299	0.20371	0.26556									1000.2	0.29371	0.353319	0.226092	0.286695	0.246415	0.231809									1000.2	0.0268438	0.0396389	0.0248078	0.0251824	0.0251365	0.022936		1000.2	0.0274243	0.00611203	0.00249522
1002.3	129.776	156.893	17.8896	141.763	50.4263	-46.6075		1002.3	0.40894	0.44864	0.29345	-0.02583	0.16402	0.24059									1002.3	0.38353	0.388349	0.255032	-0.142125	0.206725	0.206839									1002.3	0.0350529	0.0435689	0.0279832	-0.0124839	0.0210878	0.0204654		1002.3	0.0226124	0.0192949	0.00787712
1004.4	129.972	156.804	17.7003	142.142	50.6559	-46.4855		1004.4	0.61036	0.36446	0.10939	0.35724	0.39983	0.36812									1004.4	0.58495	0.304169	0.0709717	0.240945	0.442535	0.334369									1004.4	0.0534618	0.0341248	0.00778733	0.0211639	0.0451425	0.0330837		1004.4	0.0324607	0.0163794	0.00668687
1006.5	129.804	156.625	17.8423	141.871	50.5181	-46.3636		1006.5	0.44908	0.19088	0.25662	0.09072	0.26825	0.49555									1006.5	0.42367	0.130589	0.218202	-0.0255752	0.310955	0.461799									1006.5	0.0387216	0.0146508	0.023942	-0.00224645	0.0317202	0.0456921		1006.5	0.0254134	0.0173849	0.00709736
1008.6	129.749	156.804	17.9606	141.709	50.4722	-46.4551		1008.6	0.3994	0.3749	0.38016	-0.0675	0.22856	0.40958									1008.6	0.37399	0.314609	0.341742	-0.183795	0.271265	0.375829									1008.6	0.034181	0.035296	0.0374974	-0.016144	0.0276715	0.0371859		1008.6	0.025948	0.0209263	0.00854314
1010.7	129.721	157.012	17.9369	141.6	50.4951	-46.5465		1010.7	0.37762	0.58873	0.36169	-0.17152	0.25767	0.32371									1010.7	0.35221	0.528439	0.323272	-0.287815	0.300375	0.289959									1010.7	0.0321904	0.0592857	0.0354708	-0.0252808	0.0306409	0.0286896		1010.7	0.0268328	0.0278937	0.0113875
1012.8	129.776	156.774	17.9132	141.817	50.5411	-46.3941		1012.8	0.43954	0.35555	0.34323	0.04916	0.30988	0.48164									1012.8	0.41413	0.295259	0.304812	-0.0671352	0.352585	0.447889									1012.8	0.0378497	0.0331252	0.0334453	-0.00589695	0.0359668	0.0443158		1012.8	0.029801	0.0179564	0.00733065
1014.9	129.693	156.804	18.1735	141.655	50.4951	-46.4551		1014.9	0.36196	0.39057	0.60877	-0.10906	0.27009	0.42617									1014.9	0.33655	0.330279	0.570352	-0.225355	0.312795	0.392419									1014.9	0.0307592	0.0370541	0.0625815	-0.0197945	0.0319079	0.0388274		1014.9	0.0302226	0.0271022	0.0110644
1017	129.637	156.714	17.8423	141.979	50.5181	-46.2722		1017	0.31218	0.30639	0.2828	0.21992	0.29931	0.6146									1017	0.28677	0.246099	0.244382	0.103625	0.342015	0.580849									1017	0.0262095	0.0276099	0.0268146	0.0091021	0.0348886	0.0574714		1017	0.0303494	0.0157784	0.00644151
1019.1	129.637	156.476	17.8659	141.384	50.5181	-46.6684		1019.1	0.3183	0.07321	0.31164	-0.3713	0.30552	0.22393									1019.1	0.29289	0.0129188	0.273222	-0.487595	0.348225	0.190179									1019.1	0.0267689	0.00144936	0.0299791	-0.0428289	0.0355221	0.018817		1019.1	0.0116179	0.0291814	0.0119133
1021.2	129.665	156.595	17.8423	141.763	50.4951	-46.6075		1021.2	0.35232	0.19764	0.29327	0.01178	0.28873	0.29036									1021.2	0.32691	0.137349	0.254852	-0.104515	0.331435	0.256609									1021.2	0.0298781	0.0154092	0.0279634	-0.0091803	0.0338093	0.0253899		1021.2	0.0205449	0.015821	0.00645891
1023.3	129.637	156.893	17.7239	141.763	50.4722	-46.4551		1023.3	0.33054	0.50086	0.18011	0.01596	0.27204	0.44829									1023.3	0.30513	0.440569	0.141692	-0.100335	0.314745	0.414539									1023.3	0.0278875	0.0494275	0.015547	-0.00881314	0.0321068	0.041016		1023.3	0.0261953	0.0206697	0.00843836
1025.4	129.693	156.685	17.6529	141.817	50.3114	-46.5465		1025.4	0.39256	0.29748	0.11434	0.07424	0.11745	0.36242									1025.4	0.36715	0.237189	0.0759217	-0.0420552	0.160155	0.328669									1025.4	0.0335559	0.0266103	0.00833046	-0.003694	0.0163373	0.0325197		1025.4	0.0189433	0.0147547	0.00602357
1027.5	129.497	156.714	17.582	141.655	50.3114	-46.4551		1027.5	0.20328	0.3325	0.04868	-0.08398	0.12367	0.45935									1027.5	0.17787	0.272209	0.0102617	-0.200275	0.166375	0.425599									1027.5	0.0162565	0.0305392	0.00112596	-0.0175916	0.0169718	0.0421104		1027.5	0.014902	0.0211497	0.00863432
1029.6	129.525	156.774	17.6293	142.033	50.1737	-46.6075		1029.6	0.2373	0.39732	0.10122	0.2991	-0.00782	0.31248									1029.6	0.21189	0.337029	0.0628017	0.182805	0.0348852	0.278729									1029.6	0.0193658	0.0378113	0.00689088	0.016057	0.0035586	0.0275785		1029.6	0.0185437	0.0128068	0.00522835
1031.7	129.553	156.595	17.7003	141.709	50.2885	-46.4551		1031.7	0.27132	0.22375	0.17745	-0.02152	0.11319	0.47041									1031.7	0.24591	0.163459	0.139032	-0.137815	0.155895	0.436659									1031.7	0.0224751	0.0183385	0.0152552	-0.0121053	0.0159027	0.0432047		1031.7	0.0171785	0.0177179	0.00723332
1033.8	129.525	156.595	17.7476	141.871	50.2196	-46.6075		1033.8	0.24954	0.22897	0.22999	0.14506	0.0505	0.32354									1033.8	0.22413	0.168679	0.191572	0.0287648	0.0932052	0.289789									1033.8	0.0204845	0.0189241	0.0210201	0.00252662	0.00950776	0.0286728		1033.8	0.016856	0.00931394	0.0038024
1035.9	129.386	156.774	17.7713	141.817	50.1737	-46.4855		1035.9	0.11616	0.41299	0.25892	0.09514	0.01082	0.45107									1035.9	0.0907501	0.352699	0.220502	-0.0211552	0.0535252	0.417319									1035.9	0.00829415	0.0395694	0.0241944	-0.00185821	0.00546005	0.0412911		1035.9	0.0194918	0.0183223	0.00748005
1038	129.33	156.655	17.7949	141.655	50.2885	-46.6075		1038	0.06638	0.29901	0.28776	-0.06308	0.13183	0.3346									1038	0.0409701	0.238719	0.249342	-0.179375	0.174535	0.300849									1038	0.00374448	0.0267819	0.0273589	-0.0157558	0.0178041	0.0297671		1038	0.0149501	0.017833	0.00728028
1040.1	129.553	156.714	17.7239	141.655	50.4263	-46.6989		1040.1	0.2958	0.36384	0.222	-0.0589	0.27584	0.24873									1040.1	0.27039	0.303549	0.183582	-0.175195	0.318545	0.214979									1040.1	0.0247125	0.0340552	0.0201434	-0.0153886	0.0324944	0.0212708		1040.1	0.0195479	0.0180479	0.00736802
1042.2	129.386	156.536	17.7949	141.709	50.2655	-46.6684		1042.2	0.13452	0.19026	0.29823	-0.000621536	0.12125	0.28476									1042.2	0.10911	0.129969	0.259812	-0.116917	0.163955	0.251009									1042.2	0.00997218	0.0145812	0.0285077	-0.0102696	0.0167249	0.0248358		1042.2	0.0140587	0.0137176	0.0056002
1044.3	129.302	156.655	17.6293	141.763	50.2885	-46.7294		1044.3	0.05684	0.31468	0.13787	0.05776	0.15046	0.22929									1044.3	0.0314301	0.254389	0.0994517	-0.0585352	0.193165	0.195539									1044.3	0.00287257	0.0285399	0.0109123	-0.00514156	0.0197046	0.0193474		1044.3	0.0127059	0.0123471	0.00504067
1046.4	129.442	156.506	17.6056	141.384	50.1277	-46.8208		1046.4	0.20256	0.1709	0.1194	-0.31696	-0.00412	0.14342									1046.4	0.17715	0.110609	0.0809817	-0.433255	0.0385852	0.109669									1046.4	0.0161907	0.0124092	0.00888567	-0.0380559	0.00393604	0.0108511		1046.4	0.00236948	0.0202133	0.00825204
1048.5	129.47	156.655	17.6056	141.763	50.1737	-46.8208		1048.5	0.23658	0.32512	0.12464	0.06612	0.04809	0.14895									1048.5	0.21117	0.264829	0.0862217	-0.0501752	0.0907952	0.115199									1048.5	0.0193	0.0297112	0.00946062	-0.00440724	0.00926192	0.0113982		1048.5	0.0124541	0.0113951	0.00465204
1050.6	129.442	156.536	17.6293	141.546	50.1966	-46.8208		1050.6	0.2148	0.21115	0.15358	-0.1462	0.0772	0.15448									1050.6	0.18939	0.150859	0.115162	-0.262495	0.119905	0.120729									1050.6	0.0173094	0.0169249	0.012636	-0.0230568	0.0122314	0.0119454		1050.6	0.00799838	0.0154	0.00628704
1052.7	129.47	156.446	17.5346	141.709	50.2196	-46.8513		1052.7	0.24882	0.12697	0.06411	0.02028	0.10641	0.12951									1052.7	0.22341	0.0666788	0.0256917	-0.0960152	0.149115	0.0957588									1052.7	0.0204187	0.00748071	0.002819	-0.00843369	0.0152111	0.00947474		1052.7	0.00782842	0.0100539	0.00410447
1054.8	129.33	156.714	17.511	141.709	50.1966	-46.8818		1054.8	0.11534	0.40039	0.04575	0.02446	0.08962	0.10454									1054.8	0.0899301	0.340099	0.00733168	-0.0918352	0.132325	0.0707888									1054.8	0.00821921	0.0381558	0.000804465	-0.00806653	0.0134983	0.00700412		1054.8	0.0099359	0.015672	0.00639808
1056.9	129.442	156.357	17.5583	141.979	50.0588	-46.9733		1056.9	0.23316	0.04801	0.09828	0.29934	-0.04196	0.01857									1056.9	0.20775	-0.0122812	0.0598617	0.183045	0.000745225	-0.0151812									1056.9	0.0189874	-0.00137783	0.00656829	0.0160781	7.60196e-05	-0.00150208		1056.9	0.00647166	0.00911084	0.00371949
1059	129.33	156.476	17.6293	141.709	50.1507	-46.8818		1059	0.12758	0.17243	0.17452	0.03282	0.05615	0.1156									1059	0.10217	0.112139	0.136102	-0.0834752	0.0988552	0.0818488									1059	0.00933789	0.0125809	0.0149337	-0.00733221	0.0100841	0.00809843		1059	0.00795046	0.00787738	0.00321593
1061.1	129.358	156.416	17.582	141.709	49.99	-46.9733		1061.1	0.1616	0.11806	0.13246	0.037	-0.09834	0.02963									1061.1	0.13619	0.0577688	0.0940417	-0.0792952	-0.0556348	-0.00412116									1061.1	0.0124472	0.0064811	0.0103187	-0.00696505	-0.00567524	-0.000407763		1061.1	0.00269981	0.00825305	0.00336929
1063.2	129.274	156.416	17.5346	141.925	50.1277	-46.7294		1063.2	0.08402	0.12328	0.09029	0.25777	0.04557	0.27906									1063.2	0.0586101	0.0629888	0.0518717	0.141475	0.0882752	0.245309									1063.2	0.0053567	0.00706673	0.00569159	0.0124267	0.00900486	0.0242718		1063.2	0.0106364	0.00716742	0.00292609
1065.3	129.302	156.565	17.511	141.979	50.0818	-46.9733		1065.3	0.11804	0.2775	0.07193	0.31605	0.00589	0.04069									1065.3	0.0926301	0.217209	0.0335117	0.199755	0.0485952	0.00693884									1065.3	0.00846598	0.0243687	0.00367705	0.0175459	0.00495714	0.000686555		1065.3	0.00995022	0.00914209	0.00373224
1067.4	129.414	156.327	17.5583	141.546	50.2655	-46.9428		1067.4	0.23586	0.04432	0.12446	-0.11277	0.1958	0.07672									1067.4	0.21045	-0.0159712	0.0860417	-0.229065	0.238505	0.0429688									1067.4	0.0192342	-0.00179181	0.00944087	-0.0201204	0.0243297	0.0042515		1067.4	0.00589067	0.0159307	0.00650367
1069.5	129.414	156.476	17.511	141.709	50.1277	-46.8818		1069.5	0.24198	0.19855	0.0824	0.05371	0.06421	0.14325									1069.5	0.21657	0.138259	0.0439817	-0.0625852	0.106915	0.109499									1069.5	0.0197935	0.0155113	0.00482586	-0.0054973	0.0109063	0.0108342		1069.5	0.00939566	0.00886061	0.00361733
1071.6	129.246	156.446	17.3926	141.763	49.99	-46.7294		1071.6	0.0806	0.17397	-0.03077	0.11209	-0.06728	0.30118									1071.6	0.0551901	0.113679	-0.0691883	-0.00420516	-0.0245748	0.267429									1071.6	0.00504413	0.0127537	-0.00759165	-0.000369369	-0.00250685	0.0264604		1071.6	0.00563172	0.0123451	0.00503987
1073.7	129.414	156.357	17.3453	141.6	50.0588	-46.8513		1073.7	0.25422	0.08979	-0.07283	-0.04613	0.00773	0.18481									1073.7	0.22881	0.0294988	-0.111248	-0.162425	0.0504352	0.151059									1073.7	0.0209122	0.00330948	-0.0122067	-0.0142669	0.00514484	0.0149463		1073.7	0.00297321	0.0141255	0.0057667
1075.8	129.47	156.446	17.4873	141.384	50.0818	-47.0342		1075.8	0.31614	0.18441	0.07441	-0.25845	0.03695	0.00744									1075.8	0.29073	0.124119	0.0359917	-0.374745	0.0796552	-0.0263112									1075.8	0.0265714	0.0139249	0.00394917	-0.0329165	0.00812554	-0.00260333		1075.8	0.00284187	0.0201166	0.00821255
1077.9	129.33	156.446	17.511	141.655	50.1737	-47.0647		1077.9	0.18266	0.18963	0.10334	0.01633	0.13506	-0.01753									1077.9	0.15725	0.129339	0.0649217	-0.0999652	0.177765	-0.0512812									1077.9	0.014372	0.0145106	0.00712349	-0.00878065	0.0181336	-0.00507395		1077.9	0.00671417	0.0112165	0.00457911
1080	129.386	156.357	17.3217	141.384	50.2425	-46.8818		1080	0.24468	0.10546	-0.08072	-0.25009	0.21007	0.1709									1080	0.21927	0.0451688	-0.119138	-0.366385	0.252775	0.137149									1080	0.0200403	0.0050675	-0.0130724	-0.0321822	0.0257853	0.01357		1080	0.00320143	0.0220064	0.00898407
1082.1	129.274	156.297	17.3926	141.655	50.0588	-46.8208		1082.1	0.1391	0.05108	-0.00459	0.02469	0.03258	0.23743									1082.1	0.11369	-0.00921118	-0.0430083	-0.0916052	0.0752852	0.203679									1082.1	0.0103908	-0.0010334	-0.00471906	-0.00804633	0.00767976	0.0201528		1082.1	0.00407075	0.0105994	0.00432718
1084.2	129.274	156.446	17.4163	141.6	50.1507	-46.8513		1084.2	0.14522	0.2053	0.02435	-0.02523	0.13069	0.21246									1084.2	0.11981	0.145009	-0.0140683	-0.141525	0.173395	0.178709									1084.2	0.0109501	0.0162686	-0.00154364	-0.0124312	0.0176879	0.0176821		1084.2	0.00810231	0.0124348	0.00507648
1086.3	129.302	156.387	17.44	141.492	49.8981	-46.7904		1086.3	0.17924	0.15092	0.05329	-0.12935	-0.11569	0.27889									1086.3	0.15383	0.0906288	0.0148717	-0.245645	-0.0729848	0.245139									1086.3	0.0140594	0.0101677	0.00163179	-0.0215767	-0.0074451	0.024255		1086.3	0.00351533	0.0163637	0.00668045
1088.4	129.274	156.327	17.3453	141.546	49.9211	-47.1257		1088.4	0.15746	0.09654	-0.03618	-0.07097	-0.08648	-0.05088									1088.4	0.13205	0.0362488	-0.0745983	-0.187265	-0.0437748	-0.0846312									1088.4	0.0120688	0.00406676	-0.00818525	-0.0164488	-0.00446542	-0.00837373		1088.4	-0.00355628	0.0101384	0.00413897
1090.5	129.274	156.506	17.3453	141.655	49.944	-46.9123		1090.5	0.16358	0.28057	-0.03094	0.04141	-0.05737	0.16805									1090.5	0.13817	0.220279	-0.0693583	-0.0748852	-0.0146648	0.134299									1090.5	0.0126281	0.0247131	-0.0076103	-0.00657769	-0.00149594	0.013288		1090.5	0.00582423	0.0130128	0.00531247
1092.6	129.218	156.387	17.3453	141.33	50.0359	-46.9733		1092.6	0.1139	0.16659	-0.02571	-0.27921	0.04074	0.11258									1092.6	0.0884901	0.106299	-0.0641283	-0.395505	0.0834452	0.0788288									1092.6	0.0080876	0.0119257	-0.00703644	-0.03474	0.00851215	0.00779962		1092.6	-0.000908564	0.0178457	0.00728549
1094.7	129.19	156.357	17.227	141.438	49.967	-47.0647		1094.7	0.09212	0.14201	-0.13877	-0.16673	-0.02195	0.02671									1094.7	0.0667101	0.0817188	-0.177188	-0.283025	0.0207552	-0.00704116									1094.7	0.00609701	0.00916805	-0.0194419	-0.0248601	0.00211722	-0.000696679		1094.7	-0.00460273	0.0141074	0.00575933
1096.8	129.246	156.357	17.227	141.276	49.967	-47.0647		1096.8	0.15404	0.14723	-0.13353	-0.32495	-0.01573	0.03224									1096.8	0.12863	0.0869388	-0.171948	-0.441245	0.0269752	-0.00151116									1096.8	0.0117562	0.00975369	-0.0188669	-0.0387577	0.00275171	-0.00014952		1096.8	-0.00558542	0.0195544	0.00798305
1098.9	129.218	156.267	17.3217	141.492	49.8063	-46.8513		1098.9	0.13226	0.06306	-0.0336	-0.10427	-0.17022	0.25117									1098.9	0.10685	0.00276882	-0.0720183	-0.220565	-0.127515	0.217419									1098.9	0.00976562	0.000310634	-0.00790217	-0.0193738	-0.0130076	0.0215122		1098.9	-0.00144918	0.0151831	0.00619846
1101	129.274	156.297	17.2743	141.167	49.9211	-47.0037		1101	0.19418	0.09808	-0.07576	-0.42479	-0.04921	0.1043									1101	0.16877	0.0377888	-0.114178	-0.541085	-0.00650477	0.0705488									1101	0.0154248	0.00423954	-0.0125281	-0.0475273	-0.000663545	0.00698037		1101	-0.00567905	0.0224827	0.00917852
1103.1	129.246	156.357	17.2743	141.167	49.8522	-47.0647		1103.1	0.1724	0.1629	-0.07053	-0.42061	-0.1119	0.04883									1103.1	0.14699	0.102609	-0.108948	-0.536905	-0.0691948	0.0150788									1103.1	0.0134342	0.0115117	-0.0119543	-0.0471602	-0.00705848	0.00149196		1103.1	-0.00662251	0.0222211	0.00907173
1105.2	129.386	156.446	17.3453	141.384	49.9211	-47.0037		1105.2	0.31812	0.25752	0.00571	-0.19993	-0.03678	0.11536									1105.2	0.29271	0.197229	-0.0327083	-0.316225	0.00592523	0.0816088									1105.2	0.0267524	0.0221271	-0.0035889	-0.0277763	0.000604426	0.00807469		1105.2	0.00436558	0.0197024	0.00804347
1107.3	129.302	156.327	17.2507	141.492	49.8292	-47.2171		1107.3	0.24044	0.14354	-0.08366	-0.08755	-0.12247	-0.09251									1107.3	0.21503	0.0832488	-0.122078	-0.203845	-0.0797648	-0.126261									1107.3	0.0196528	0.0093397	-0.013395	-0.0179052	-0.00813672	-0.0124928		1107.3	-0.00382285	0.0148867	0.00607748
1109.4	129.107	156.238	17.2743	141.384	50.0359	-47.1561		1109.4	0.05126	0.05937	-0.05482	-0.19157	0.09044	-0.02599									1109.4	0.0258501	-0.000921183	-0.0932383	-0.307865	0.133145	-0.0597412									1109.4	0.00236258	-0.000103348	-0.0102305	-0.027042	0.013582	-0.00591102		1109.4	-0.00455705	0.0136846	0.00558669
1111.5	129.162	156.267	17.1797	141.6	49.8063	-47.3086		1111.5	0.11318	0.09439	-0.14418	0.02911	-0.13295	-0.17296									1111.5	0.0877701	0.0340988	-0.182598	-0.0871852	-0.0902448	-0.206711									1111.5	0.0080218	0.00382555	-0.0200355	-0.00765809	-0.00920577	-0.0204528		1111.5	-0.00758413	0.0118068	0.0048201
1113.6	129.135	156.178	17.156	141.492	49.7374	-47.2781		1113.6	0.0914	0.01021	-0.16265	-0.07501	-0.19564	-0.13693									1113.6	0.0659901	-0.0500812	-0.201068	-0.191305	-0.152935	-0.170681									1113.6	0.0060312	-0.00561862	-0.0220621	-0.0168037	-0.0156007	-0.0168878		1113.6	-0.0118236	0.0102649	0.00419061
1115.7	129.218	156.387	17.2743	141.384	49.8522	-47.3086		1115.7	0.18122	0.22403	-0.03911	-0.17903	-0.07462	-0.1619									1115.7	0.15581	0.163739	-0.0775283	-0.295325	-0.0319148	-0.195651									1115.7	0.0142404	0.0183699	-0.00850675	-0.0259405	-0.00325559	-0.0193585		1115.7	-0.00407518	0.0177269	0.00723699
1117.8	128.967	156.327	17.3217	141.384	49.8292	-47.2781		1117.8	-0.06386	0.16965	0.01352	-0.17485	-0.09141	-0.12587									1117.8	-0.0892699	0.109359	-0.0248983	-0.291145	-0.0487048	-0.159621									1117.8	-0.00815887	0.012269	-0.00273195	-0.0255733	-0.00496832	-0.0157935		1117.8	-0.00749284	0.0127736	0.00521478
1119.9	129.107	156.387	17.1087	141.546	49.8522	-47.2781		1119.9	0.08186	0.23448	-0.19424	-0.00827	-0.0622	-0.12034									1119.9	0.0564501	0.174189	-0.232658	-0.124565	-0.0194948	-0.154091									1119.9	0.00515929	0.0195423	-0.0255283	-0.0109414	-0.00198864	-0.0152464		1119.9	-0.00483386	0.0159758	0.00652211
[truncated: 132 more rows]
[truncated: 1 more columns]

## Sheet: Fig4B_timida
				Original data (P700 deltaI/I x10³)																		After slope correction in Origin (baseline subtraction tool)															Zero levels
[truncated: 762 more rows]
[truncated: 52 more columns]

## Sheet: Fig4B Acetabularia
		Original data (P700 deltaI/I x10³)								Zero levels								Zero levels set							Maximum at onset of light pulse						Normalized to maximum					Averaged data (shown in Fig. 4B)						Normalized to maximum					Averaged data (shown in Fig. 4B inset)
[truncated: 5,334 more rows]
[truncated: 1 more columns]

[truncated: 4 more sheets: Fig4C timida, Fig4C Acetabularia, Fig4D timida, Fig4D Acetabularia]
