# Supplementary material for: Photosynthetic sea slugs induce protective changes to the light reactions of the chloroplasts they steal from algae
Source: eLife. 2020 Oct 20;9:e57389. doi: 10.7554/eLife.57389 (PMC7679141; doi:10.7554/eLife.57389)
Supplement: Figure 7—source data 1. [file elife-57389-fig7-data1.xlsx]

## Sheet: Fig6B amb timida
																		Original data (mm)
	Time (days)	slug1	slug2	slug3	slug4	slug5	slug6	slug7	slug8	slug9	slug10	slug11	slug12	slug13	slug14	slug15	slug16	slug17	slug18	slug19	slug20	slug21	slug22	slug23	slug24	slug25	slug26	slug27	slug28	slug29	slug30	slug31	slug32	slug33	slug34	slug35	slug36	slug37	slug38	slug39	slug40	slug41	slug42	slug43	slug44	slug45	slug46	slug47	slug48
	0	5.235	5.14	5.397	6.628	4.196	5.921	4.321	4.042	6.881	6.777	4.55	6.82	6.111	7.496	5.761	7.754	8.894	7.554	5.074	8.675	6.549	4.261	7.517	4.02	8.064	6.95	5.109	6.805	6.831	6.901	8.435	6.759	7.139	4.952	6.844	8.441	8.107	7.912	4.824	6.173	5.336	3.694	7.382	4.926	8.072	4.839	8.277	6.064
	5	3.154	6.012	4.407	3.935	3.734	4.5	5.476	5.538	5.773	6.52	3.125	3.223	4.571	3.775	5.84	4.075	2.922	5.731	3.964	7.431	3.791	4.194	3.99	3.794	6.494	7.055	6.168	4.531	5.078	5.128	5.782	4.079	5.507	4.139	4.469	3.28	3.116	4.891	7.814	5.39
	9	6.319	6.281	4.427	4.629	4.579	2.97	6.019	7.219	6.153	4.505	4.597	5.443	5.783	5.625	4.59	4.391	3.703	4.125	5.645	5.144	4.404	2.451	6.85	4.312	5.422	5.33	4.333	4.663	6.038	3.854
	15	2.77	3.239	3.65	3.834	4.293	3.096	3.791	4.042	3.17	6.176	3.548	4.059	5.64	3.849	5.356	3.182	3.587	3.249	3.518	3.507	4.118	4.491	3.909	2.779	3.76	3.325	4.042	5.067	3.362	2.466
	19	2.808	3.485	3.657	2.123	4.736	2.451	3.478	2.691	3.384	7.46	4.675	4.378	4.409	3.332	3.173	4.72	2.424	3.388	4.247	4.01
	25	3.054	3.505	4.794	2.876	3.969	3.44	4.156	3.925	4.172	3.93	4.532	2.813	3.406	5.144	3.192	1.84	4.187	5.877	4.629	1.965
	29	5.388	3.928	3.462	4.535	3.628	2.927	3.378	5.135	4.322	2.318	3.869	4.105	3.592	3.624	3.993	3.348	6.075	4.97	5.736
	35	2.824	3.572	3.673	4.191	2.599	2.125	5.123	4.007	4.147	3.011	2.899	3.875	2.963	2.128	2.968	2.998	5.929
	46	2.86	5.069	2.921	2.878	3.38	4.721	4.872	3.098	3.221	2.555	1.696
[truncated: 6 more columns]

## Sheet: Fig6B CO2 timida
																		Original data (mm)
	Time (days)	slug1	slug2	slug3	slug4	slug5	slug6	slug7	slug8	slug9	slug10	slug11	slug12	slug13	slug14	slug15	slug16	slug17	slug18	slug19	slug20	slug21	slug22	slug23	slug24	slug25	slug26	slug27	slug28	slug29	slug30	slug31	slug32	slug33	slug34	slug35	slug36	slug37	slug38	slug39	slug40	slug41	slug42	slug43	slug44	slug45	slug46	slug47	slug48
	0	8.687	6.839	6.524	3.906	5.098	3.312	5.146	2.991	4.351	8.685	8.081	6.915	7.649	8.821	6.2	6.607	6.051	5.999	5.519	5.162	6.688	7.018	9.11	6.583	3.302	5.982	5.146	6.332	5.118	4.358	5.049	3.811	4.259	3.711	6.853	3.198	7.191	6.152	3.99	6.431	3.959	3.835	5.6	4.929	6.378	7.721	4.979	4.87
	5	6.065	5.332	7.232	8.496	3.945	3.763	7.57	5.838	4.221	4.829	5.445	6.155	4.294	7.835	9.472	6.009	6.611	9.82	4.319	3.08	7.254	3.83	5.53	5.403	5.772	3.71	4.186	4.538	5.926	6.291	4.434	3.832	3.312	4.539	4.391	6.277	4.03	5.885	4.166	4.185
	9	3.785	5.133	2.911	2.834	4.581	6.979	4.159	4.879	8.529	5.008	3.164	7.939	5.447	2.304	3.628	6.398	6.399	3.426	5.05	3.909	7.105	3.065	7.515	5.153	5.164	3.5	4.695	6.819	5.2	4.437
	15	3.07	3.522	3.832	5.803	5.059	2.952	3.561	4.986	4.728	2.47	4.833	5.477	5.363	5.543	3.963	4.814	2.884	3.902	3.389	4.295	3.457	3.328	3.986	3.488	3.452	3.333	5.101	2.751	3.13	4.033
	19	3.913	4.893	3.306	4.103	2.817	4.875	5.716	3.64	4.507	4.291	4.891	4.128	3.318	5.311	3.469	5.751	4.509	3.203	4.791	4.208
	25	4.294	1.931	5.446	5.165	3.672	2.897	3.54	3.928	6.312	3.206	2.168	4.608	5.312	4.988	3.045	4.903	3.826	4.249	4.876	5.648
	29	4.359	3.882	3.727	3.056	4.827	3.231	3.214	2.661	3.045	3.77	5.186	5.869	4.78	5.419	5.467	4.611	2.398	4.814
	35	2.474	2.875	2.887	2.38	4.056	3.545	2.56	5.147	4.66	2.014	3.319	3.095	3.599	2.294	3.066	2.819	3.527
	46	3.388	2.922	3.218	2.653	3.215	1.012	2.877	1.88
[truncated: 6 more columns]

## Sheet: Fig6C amb timida
																		Original data (Fv/Fm)
	Time (days)	slug1	slug2	slug3	slug4	slug5	slug6	slug7	slug8	slug9	slug10	slug11	slug12	slug13	slug14	slug15	slug16	slug17	slug18	slug19	slug20	slug21	slug22	slug23	slug24	slug25	slug26	slug27	slug28	slug29	slug30	slug31	slug32	slug33	slug34	slug35	slug36	slug37	slug38	slug39	slug40	slug41	slug42	slug43	slug44	slug45	slug46	slug47	slug48
	0	0.79	0.743	0.727	0.73	0.726	0.718	0.731	0.71	0.729	0.746	0.715	0.733	0.709	0.751	0.733	0.75	0.735	0.719	0.715	0.743	0.734	0.759	0.735	0.726	0.701	0.747	0.722	0.746	0.74	0.733	0.75	0.712	0.728	0.73	0.747	0.751	0.696	0.721	0.731	0.705	0.675	0.723	0.733	0.736	0.732	0.734	0.676	0.769
	2	0.757	0.755	0.742	0.726	0.723	0.686	0.723	0.737	0.723	0.743	0.728	0.726	0.75	0.722	0.731	0.751	0.745	0.738	0.72	0.738	0.733	0.701	0.741	0.722	0.698	0.737	0.709	0.735	0.72	0.713	0.741	0.694	0.713	0.728	0.686	0.708	0.748	0.724	0.687	0.715
	4	0.658	0.665	0.678	0.689	0.683	0.717	0.717	0.742	0.745	0.725	0.717	0.729	0.718	0.717	0.729	0.673	0.701	0.738	0.704	0.739	0.698	0.747	0.719	0.747	0.692	0.715	0.681	0.704	0.736	0.739	0.75	0.749	0.724	0.722	0.707	0.749	0.723	0.732	0.722	0.735
	5	0.726	0.744	0.733	0.681	0.722	0.74	0.725	0.727	0.699	0.737	0.73	0.724	0.67	0.69	0.74	0.709	0.743	0.706	0.696	0.747	0.709	0.713	0.727	0.717	0.744	0.744	0.714	0.746	0.747	0.735	0.758	0.752	0.727	0.731	0.71	0.746	0.722	0.687	0.738	0.708
	7	0.736	0.759	0.759	0.726	0.751	0.758	0.684	0.743	0.75	0.75	0.725	0.724	0.745	0.738	0.713	0.726	0.727	0.714	0.715	0.746	0.735	0.741	0.744	0.73	0.705	0.692	0.747	0.727	0.72	0.697
	9	0.706	0.678	0.718	0.731	0.703	0.728	0.706	0.731	0.703	0.719	0.64	0.717	0.741	0.624	0.752	0.724	0.674	0.734	0.746	0.71	0.736	0.745	0.726	0.704	0.752	0.719	0.753	0.732	0.739	0.752
	11	0.696	0.713	0.723	0.715	0.715	0.725	0.74	0.721	0.707	0.729	0.68	0.616	0.654	0.716	0.726	0.744	0.734	0.732	0.739	0.72	0.737	0.696	0.727	0.72	0.729	0.688	0.719	0.524	0.697	0.74
	13	0.72	0.694	0.728	0.737	0.729	0.7	0.735	0.744	0.509	0.682	0.694	0.731	0.74	0.725	0.73	0.749	0.727	0.726	0.743	0.69	0.699	0.734	0.714	0.749	0.734	0.712	0.713	0.294	0.75	0.7
	15	0.73	0.738	0.729	0.746	0.664	0.724	0.657	0.674	0.73	0.68	0.716	0.719	0.69	0.688	0.333	0.683	0.687	0.748	0.725	0.657	0.741	0.71	0.663	0.737	0.067	0.709	0.733	0.714	0.674	0.723
	17	0.743	0.705	0.726	0.513	0.619	0.635	0.651	0.749	0.639	0.707	0.684	0.69	0.739	0.703	0.714	0.651	0.675	0.651	0.702	0.702
	19	0.735	0.653	0.72	0.695	0.72	0.75	0.573	0.693	0.559	0.657	0.633	0.732	0.716	0.615	0.496	0.701	0.461	0.644	0.678	0.697
	21	0.661	0.701	0.712	0.645	0.689	0.418	0.69	0.722	0.706	0.321	0.664	0.666	0	0.52	0.694	0.164	0.705	0.676	0.567	0.674
	23	0.64	0.548	0.656	0.679	0.59	0.648	0	0	0.469	0.688	0.351	0.664	0	0.662	0.286	0.66	0	0.507	0.616	0.584
	25	0.595	0.636	0	0.647	0	0.341	0.674	0.529	0.617	0.678	0	0.517	0.636	0	0.133	0.718	0.253	0.599	0.724	0.35
	27	0	0.604	0.548	0.679	0	0.607	0.567	0.493	0	0.634	0.553	0.681	0.248	0	0.605	0	0.687	0	0
	29	0.564	0.637	0.559	0.574	0.4	0.493	0	0	0	0.623	0.678	0.24	0.665	0.418	0	0	0	0.574	0.469
	31	0	0.406	0.267	0.494	0.555	0.429	0.491	0	0	0.571	0.653	0	0.561	0.243	0	0	0	0.52	0
	33	0.528	0.517	0.2	0.2	0	0	0.369	0	0.484	0.365	0	0.556	0.374	0.228	0	0	0	0.495	0
	35	0.383	0.344	0	0.096	0.314	0	0	0.25	0	0	0	0.333	0	0	0	0	0.535
	39	0	0	0.248	0.215	0	0	0	0	0	0	0	0	0	0	0	0	0
	45	0.086	0	0	0.165	0	0	0	0	0	0	0
[truncated: 6 more columns]

## Sheet: Fig6C CO2 timida
																		Original data (Fv/Fm)
	Time (days)	slug1	slug2	slug3	slug4	slug5	slug6	slug7	slug8	slug9	slug10	slug11	slug12	slug13	slug14	slug15	slug16	slug17	slug18	slug19	slug20	slug21	slug22	slug23	slug24	slug25	slug26	slug27	slug28	slug29	slug30	slug31	slug32	slug33	slug34	slug35	slug36	slug37	slug38	slug39	slug40	slug41	slug42	slug43	slug44	slug45	slug46	slug47	slug48
	0	0.591	0.753	0.765	0.724	0.756	0.742	0.756	0.621	0.667	0.62	0.753	0.648	0.748	0.762	0.699	0.734	0.707	0.7	0.656	0.664	0.745	0.746	0.759	0.614	0.681	0.62	0.661	0.723	0.716	0.725	0.719	0.524	0.737	0.761	0.65	0.737	0.677	0.624	0.692	0.693	0.746	0.603	0.631	0.776	0.699	0.701	0.62	0.702
	2	0.796	0.736	0.77	0.772	0.778	0.786	0.767	0.791	0.747	0.764	0.763	0.714	0.785	0.678	0.754	0.769	0.755	0.729	0.786	0.776	0.72	0.733	0.693	0.729	0.708	0.733	0.738	0.754	0.653	0.6	0.729	0.77	0.662	0.719	0.657	0.579	0.731	0.77	0.761	0.745
	4	0.745	0.745	0.724	0.765	0.741	0.758	0.726	0.727	0.758	0.744	0.767	0.656	0.74	0.754	0.762	0.751	0.736	0.765	0.753	0.735	0.677	0.75	0.76	0.754	0.75	0.748	0.732	0.75	0.733	0.761	0.737	0.728	0.698	0.774	0.657	0.797	0.757	0.75	0.748	0.771
	5	0.739	0.739	0.745	0.765	0.757	0.712	0.745	0.766	0.743	0.729	0.753	0.697	0.725	0.692	0.734	0.738	0.763	0.724	0.744	0.754	0.712	0.761	0.763	0.74	0.75	0.652	0.751	0.66	0.705	0.773	0.729	0.738	0.646	0.681	0.61	0.747	0.738	0.766	0.778	0.707
	7	0.768	0.763	0.744	0.765	0.777	0.749	0.783	0.759	0.729	0.705	0.744	0.779	0.782	0.77	0.76	0.717	0.729	0.734	0.759	0.764	0.684	0.734	0.718	0.698	0.715	0.749	0.701	0.694	0.751	0.703
	9	0.742	0.721	0.73	0.741	0.764	0.771	0.741	0.75	0.741	0.727	0.734	0.735	0.74	0.727	0.773	0.747	0.743	0.732	0.736	0.755	0.757	0.746	0.771	0.702	0.746	0.74	0.736	0.745	0.737	0.775
	11	0.747	0.735	0.717	0.735	0.759	0.697	0.721	0.743	0.691	0.734	0.737	0.762	0.69	0.749	0.722	0.723	0.732	0.722	0.711	0.722	0.732	0.751	0.733	0.72	0.763	0.689	0.78	0.737	0.706	0.738
	13	0.756	0.741	0.773	0.758	0.753	0.716	0.742	0.746	0.769	0.773	0.727	0.771	0.753	0.763	0.757	0.724	0.703	0.724	0.713	0.73	0.726	0.688	0.683	0.679	0.79	0.724	0.744	0.725	0.782	0.697
	15	0.732	0.713	0.764	0.751	0.765	0.748	0.733	0.728	0.693	0.721	0.746	0.781	0.727	0.743	0.767	0.73	0.733	0.731	0.74	0.706	0.763	0.748	0.662	0.703	0.758	0.78	0.723	0.728	0.735	0.716
	17	0.729	0.73	0.729	0.675	0.675	0.752	0.726	0.654	0.744	0.735	0.728	0.727	0.724	0.717	0.732	0.6	0.699	0.642	0.741	0.734
	19	0.688	0.703	0.727	0.744	0.696	0.737	0.655	0.699	0.631	0.714	0.666	0.684	0.689	0.709	0.753	0.649	0.325	0.692	0.711	0.686
	21	0.688	0.54	0.726	0.626	0.718	0.655	0.589	0.65	0.691	0.701	0.606	0.699	0.594	0	0.562	0.454	0.602	0.637	0.704	0.51
	23	0.561	0.638	0.64	0.627	0.409	0.595	0.477	0.56	0.494	0.631	0.577	0.609	0.493	0.668	0.321	0.719	0.568	0	0	0.548
	25	0.382	0.699	0.645	0.6	0.495	0.644	0.626	0.556	0.589	0.671	0.429	0.56	0.417	0.676	0.51	0.323	0.721	0.55	0.516	0
	27	0.64	0	0.616	0.677	0	0.652	0.598	0.638	0	0.277	0	0.423	0.666	0.456	0.594	0.2	0.141	0.223	0
	29	0.252	0.525	0.526	0.548	0	0.576	0.5	0	0	0	0.257	0.3	0.385	0.523	0.367	0.696	0	0
	31	0.456	0.537	0	0	0	0	0.539	0.46	0.348	0.228	0	0.364	0	0	0	0.618	0
	33	0.341	0	0	0	0.439	0	0.366	0.425	0.522	0	0.594	0	0	0	0.147	0.4	0.043
	35	0.415	0	0	0	0.337	0	0	0.248	0.495	0	0	0	0	0	0.512	0	0
	39	0.333	0	0.389	0	0.116	0	0	0	0	0	0	0	0	0	0	0	0
	45	0.154	0	0	0	0	0.182	0	0	0
[truncated: 6 more columns]

## Sheet: Fig6D amb timida
																		Original data (F0)
	Time (days)	slug1	slug2	slug3	slug4	slug5	slug6	slug7	slug8	slug9	slug10	slug11	slug12	slug13	slug14	slug15	slug16	slug17	slug18	slug19	slug20	slug21	slug22	slug23	slug24	slug25	slug26	slug27	slug28	slug29	slug30	slug31	slug32	slug33	slug34	slug35	slug36	slug37	slug38	slug39	slug40	slug41	slug42	slug43	slug44	slug45	slug46	slug47	slug48
	0	0.256	0.349	0.301	0.343	0.415	0.265	0.299	0.265	0.244	0.443	0.564	0.485	0.59	0.281	0.352	0.393	0.51	0.366	0.357	0.367	0.549	0.34	0.512	0.603	0.463	0.435	0.544	0.355	0.422	0.456	0.33	0.509	0.453	0.417	0.424	0.305	0.417	0.465	0.425	0.325	0.313	0.444	0.394	0.476	0.354	0.334	0.281	0.398
	2	0.591	0.505	0.266	0.328	0.484	0.401	0.269	0.311	0.464	0.351	0.242	0.366	0.333	0.334	0.482	0.386	0.435	0.411	0.41	0.233	0.311	0.336	0.341	0.371	0.394	0.334	0.475	0.421	0.364	0.364	0.424	0.185	0.357	0.302	0.224	0.441	0.343	0.235	0.391	0.294
	4	0.26	0.501	0.34	0.474	0.206	0.415	0.41	0.362	0.651	0.378	0.394	0.466	0.248	0.416	0.356	0.481	0.532	0.31	0.271	0.425	0.323	0.378	0.474	0.32	0.444	0.394	0.235	0.328	0.468	0.344	0.297	0.394	0.416	0.417	0.417	0.366	0.429	0.49	0.446	0.388
	5	0.53	0.248	0.111	0.595	0.23	0.401	0.359	0.389	0.356	0.394	0.433	0.269	0.28	0.686	0.482	0.286	0.415	0.362	0.49	0.352	0.426	0.448	0.471	0.383	0.445	0.346	0.436	0.46	0.399	0.36	0.306	0.349	0.405	0.379	0.367	0.374	0.335	0.211	0.306	0.349
	7	0.357	0.424	0.25	0.357	0.362	0.384	0.195	0.346	0.445	0.319	0.256	0.468	0.263	0.343	0.175	0.225	0.347	0.276	0.35	0.273	0.3	0.379	0.407	0.367	0.309	0.394	0.399	0.412	0.37	0.171
	9	0.264	0.424	0.24	0.479	0.287	0.251	0.37	0.37	0.333	0.389	0.205	0.229	0.37	0.124	0.407	0.373	0.116	0.352	0.29	0.256	0.234	0.214	0.416	0.273	0.323	0.389	0.233	0.28	0.294	0.301
	11	0.225	0.205	0.326	0.487	0.425	0.219	0.355	0.373	0.203	0.3	0.244	0.11	0.181	0.261	0.466	0.301	0.306	0.421	0.287	0.249	0.315	0.233	0.23	0.295	0.282	0.229	0.292	0.078	0.246	0.306
	13	0.305	0.212	0.324	0.211	0.209	0.196	0.325	0.258	0.078	0.115	0.186	0.287	0.334	0.136	0.316	0.214	0.282	0.223	0.24	0.196	0.19	0.323	0.237	0.188	0.289	0.244	0.334	0.015	0.284	0.184
	15	0.305	0.255	0.234	0.325	0.073	0.196	0.141	0.147	0.168	0.185	0.244	0.383	0.294	0.113	0.025	0.207	0.18	0.281	0.244	0.139	0.229	0.147	0.125	0.258	0.014	0.163	0.193	0.206	0.14	0.209
	17	0.195	0.206	0.2	0.056	0.09	0.12	0.291	0.176	0.23	0.29	0.21	0.06	0.134	0.164	0.198	0.095	0.194	0.136	0.105	0.161
	19	0.19	0.268	0.139	0.18	0.251	0.285	0.048	0.241	0.059	0.14	0.138	0.245	0.135	0.146	0.063	0.189	0.033	0.101	0.269	0.171
	21	0.169	0.204	0.241	0.087	0.25	0.024	0.146	0.159	0.205	0.028	0.094	0.133	0.019	0.105	0.174	0.023	0.235	0.203	0.093	0.086
	23	0.154	0.14	0.156	0.205	0.23	0.259	0.023	0.019	0.063	0.161	0.06	0.24	0.02	0.133	0.05	0.198	0.03	0.066	0.218	0.065
	25	0.165	0.131	0.016	0.145	0.016	0.028	0.254	0.139	0.125	0.199	0.021	0.035	0.163	0.034	0.013	0.14	0.028	0.168	0.121	0.026
	27	0.011	0.104	0.153	0.203	0.013	0.116	0.165	0.095	0.025	0.154	0.128	0.098	0.031	0.014	0.129	0.014	0.12	0.014	0.018
	29	0.048	0.183	0.146	0.113	0.105	0.09	0.013	0.021	0.013	0.138	0.125	0.019	0.09	0.008	0.014	0.011	0.013	0.066	0.073
	31	0.011	0.121	0.076	0.134	0.089	0.085	0.028	0.013	0.01	0.176	0.049	0.011	0.073	0.035	0.011	0.026	0.013	0.051	0.014
	33	0.174	0.084	0.056	0.025	0.019	0.004	0.086	0.024	0.156	0.05	0.013	0.075	0.036	0.028	0.006	0.011	0.018	0.053	0.019
	35	0.128	0.109	0.0.15	0.026	0.018	0.01	0.039	0.03	0.025	0.005	0.009	0.015	0.014	0.011	0.004	0.014	0.036
	39	0.008	0.021	0.109	0.102	0.009	0.006	0.009	0.018	0.013	0.013	0.011	0.026	0.01	0.015	0.008	0.01	0.016
	45	0.064	0.01	0.009	0.024	0.015	0.016	0.005	0.014	0.013	0.021	0.023
																		Original data (FM)
	Time (days)	slug1	slug2	slug3	slug4	slug5	slug6	slug7	slug8	slug9	slug10	slug11	slug12	slug13	slug14	slug15	slug16	slug17	slug18	slug19	slug20	slug21	slug22	slug23	slug24	slug25	slug26	slug27	slug28	slug29	slug30	slug31	slug32	slug33	slug34	slug35	slug36	slug37	slug38	slug39	slug40	slug41	slug42	slug43	slug44	slug45	slug46	slug47	slug48
	0	1.218	1.36	1.104	1.269	1.512	0.94	1.11	0.915	0.901	1.746	1.979	1.817	2.026	1.13	1.316	1.57	1.921	1.304	1.252	1.43	2.065	1.41	1.933	2.529	1.549	1.718	1.955	1.399	1.625	1.705	1.319	1.77	1.664	1.545	1.675	1.222	1.374	1.669	1.58	1.101	0.964	1.601	1.478	1.801	1.319	1.255	0.866	1.724
	2	2.433	2.058	1.031	1.195	1.75	1.308	0.971	1.181	1.677	1.365	0.889	1.336	1.33	1.2	1.792	1.55	1.704	1.571	1.462	0.889	1.165	1.124	1.316	1.334	1.306	1.271	1.63	1.59	1.3	1.268	1.637	0.604	1.244	1.11	0.713	1.509	1.363	0.853	1.25	1.032
	4	0.76	1.495	1.055	1.522	0.65	1.468	1.45	1.405	2.558	1.373	1.394	1.721	0.879	1.47	1.314	1.469	1.778	1.183	0.915	1.629	1.071	1.494	1.685	1.262	1.441	1.383	0.738	1.109	1.772	1.317	1.186	1.57	1.508	1.501	1.425	1.458	1.551	1.826	1.603	1.465
	5	1.938	0.968	0.416	1.866	0.828	1.544	1.306	1.425	1.184	1.499	1.601	0.976	0.848	2.211	1.856	0.984	1.615	1.232	1.614	1.391	1.466	1.56	1.724	1.353	1.736	1.351	1.525	1.811	1.576	1.357	1.264	1.407	1.482	1.411	1.266	1.475	1.204	0.675	1.17	1.195
	7	1.351	1.76	1.039	1.305	1.451	1.59	0.618	1.344	1.779	1.275	0.93	1.695	1.03	1.308	0.609	0.823	1.271	0.965	1.23	1.076	1.134	1.462	1.591	1.361	1.046	1.279	1.577	1.51	1.324	0.564
	9	0.897	1.319	0.853	1.778	0.966	0.924	1.26	1.374	1.121	1.383	0.569	0.81	1.429	0.33	1.64	1.35	0.356	1.325	1.141	0.881	0.885	0.84	1.516	0.924	1.301	1.386	0.944	1.046	1.126	1.212
	11	0.74	0.715	1.177	1.708	1.49	0.795	1.367	1.336	0.693	1.109	0.762	0.286	0.522	0.917	1.701	1.177	1.149	1.573	1.101	0.889	1.199	0.766	0.843	1.052	1.041	0.734	1.04	0.164	0.813	1.179
	13	1.089	0.694	1.192	0.804	0.772	0.652	1.226	1.009	0.159	0.361	0.609	1.066	1.285	0.495	1.17	0.854	1.031	0.814	0.934	0.632	0.631	1.215	0.83	0.75	1.085	0.848	1.164	0.021	1.136	0.613
	15	1.131	0.975	0.865	1.28	0.218	0.71	0.411	0.451	0.623	0.579	0.86	1.363	0.949	0.362	0.038	0.654	0.575	1.115	0.886	0.405	0.882	0.506	0.371	0.98	0.015	0.56	0.723	0.72	0.43	0.754
	17	0.757	0.698	0.731	0.115	0.236	0.329	0.835	0.7	0.637	0.99	0.665	0.194	0.512	0.552	0.693	0.273	0.596	0.39	0.352	0.54
	19	0.716	0.771	0.496	0.59	0.896	1.139	0.113	0.786	0.134	0.409	0.376	0.915	0.475	0.379	0.125	0.632	0.061	0.284	0.835	0.564
	21	0.499	0.683	0.838	0.245	0.805	0.041	0.471	0.571	0.696	0.041	0.28	0.399	0.019	0.219	0.569	0.028	0.797	0.626	0.215	0.264
	23	0.427	0.31	0.454	0.639	0.561	0.735	0.02	0.018	0.119	0.516	0.093	0.714	0.018	0.394	0.07	0.583	0.02	0.134	0.568	0.156
	25	0.407	0.36	0.016	0.411	0.015	0.043	0.779	0.295	0.326	0.618	0.016	0.073	0.448	0.023	0.015	0.496	0.038	0.419	0.439	0.04
	27	0.015	0.263	0.339	0.632	0.011	0.295	0.381	0.188	0.021	0.421	0.286	0.308	0.041	0.015	0.326	0.013	0.384	0.015	0.016
	29	0.11	0.504	0.331	0.265	0.175	0.177	0.015	0.018	0.011	0.366	0.389	0.025	0.269	0.014	0.011	0.013	0.013	0.155	0.138
	31	0.013	0.204	0.104	0.265	0.2	0.149	0.055	0.014	0.015	0.41	0.141	0.018	0.166	0.046	0.015	0.014	0.015	0.106	0.014
	33	0.369	0.174	0.07	0.031	0.011	0.013	0.136	0.013	0.302	0.079	0.014	0.169	0.058	0.036	0.013	0.011	0.014	0.105	0.013
	35	0.207	0.166	0.014	0.029	0.026	0.013	0.033	0.04	0.021	0.015	0.011	0.023	0.018	0.014	0.011	0.011	0.078
	39	0.009	0.019	0.145	0.13	0.013	0.013	0.011	0.015	0.014	0.013	0.014	0.019	0.011	0.011	0.009	0.01	0.009
	45	0.07	0.013	0.014	0.029	0.011	0.011	0.01	0.013	0.013	0.015	0.011
[truncated: 6 more columns]

## Sheet: Fig6D CO2 timida
																		Original data (F0)
	Time (days)	slug1	slug2	slug3	slug4	slug5	slug6	slug7	slug8	slug9	slug10	slug11	slug12	slug13	slug14	slug15	slug16	slug17	slug18	slug19	slug20	slug21	slug22	slug23	slug24	slug25	slug26	slug27	slug28	slug29	slug30	slug31	slug32	slug33	slug34	slug35	slug36	slug37	slug38	slug39	slug40	slug41	slug42	slug43	slug44	slug45	slug46	slug47	slug48
	0	0.338	0.631	0.414	0.305	0.285	0.373	0.625	0.539	0.614	0.261	0.522	0.578	0.32	0.555	0.625	0.616	0.524	0.507	0.507	0.86	0.351	0.436	0.492	0.711	0.315	0.655	0.385	0.287	0.498	0.359	0.458	0.304	0.435	0.371	0.474	0.38	0.311	0.221	0.278	0.357	0.367	0.672	0.355	0.242	0.531	0.351	0.371	0.434
	2	0.454	0.255	0.376	0.395	0.514	0.299	0.313	0.534	0.429	0.33	0.395	0.484	0.411	0.316	0.566	0.352	0.286	0.389	0.34	0.324	0.275	0.212	0.323	0.416	0.376	0.276	0.25	0.313	0.331	0.228	0.292	0.286	0.33	0.341	0.23	0.276	0.296	0.24	0.341	0.347
	4	0.531	0.343	0.193	0.601	0.439	0.253	0.268	0.333	0.362	0.302	0.583	0.389	0.355	0.323	0.496	0.279	0.328	0.316	1.571	0.33	0.359	0.356	0.326	0.331	0.339	0.302	0.306	0.319	0.253	0.273	0.296	0.308	0.241	0.285	0.231	0.331	0.291	0.206	0.294	0.245
	5	0.427	0.328	0.269	0.49	0.291	0.384	0.627	0.25	0.657	0.347	0.239	0.314	0.33	0.468	0.463	0.376	0.554	0.38	0.517	0.244	0.308	0.304	0.35	0.251	0.381	0.23	0.241	0.338	0.273	0.271	0.306	0.326	0.309	0.415	0.142	0.159	0.249	0.24	0.215	0.282
	7	0.338	0.242	0.254	0.198	0.388	0.306	0.498	0.345	0.254	0.439	0.339	0.246	0.517	0.334	0.284	0.29	0.214	0.403	0.264	0.295	0.204	0.305	0.258	0.323	0.426	0.161	0.216	0.269	0.406	0.301
	9	0.258	0.371	0.209	0.224	0.595	0.564	0.285	0.474	0.181	0.237	0.304	0.292	0.324	0.236	0.263	0.375	0.289	0.274	0.128	0.274	0.236	0.388	0.338	0.153	0.176	0.188	0.258	0.271	0.273	0.285
	11	0.49	0.198	0.25	0.328	0.169	0.25	0.325	0.256	0.273	0.259	0.289	0.276	0.366	0.301	0.405	0.242	0.254	0.19	0.246	0.153	0.249	0.389	0.259	0.29	0.271	0.144	0.296	0.268	0.199	0.271
	13	0.249	0.268	0.189	0.282	0.146	0.172	0.282	0.155	0.41	0.319	0.245	0.207	0.214	0.287	0.158	0.176	0.282	0.273	0.248	0.155	0.361	0.185	0.194	0.229	0.225	0.189	0.216	0.154	0.219	0.131
	15	0.347	0.145	0.131	0.32	0.212	0.165	0.274	0.175	0.171	0.16	0.29	0.191	0.286	0.11	0.313	0.101	0.124	0.179	0.216	0.181	0.198	0.153	0.1	0.158	0.237	0.195	0.185	0.15	0.154	0.14
	17	0.21	0.196	0.193	0.144	0.166	0.23	0.111	0.13	0.245	0.177	0.176	0.131	0.158	0.15	0.193	0.101	0.147	0.102	0.154	0.175
	19	0.196	0.201	0.14	0.266	0.164	0.205	0.149	0.281	0.084	0.18	0.166	0.104	0.13	0.21	0.17	0.111	0.043	0.161	0.161	0.136
	21	0.207	0.065	0.29	0.163	0.18	0.135	0.194	0.236	0.305	0.131	0.066	0.138	0.14	0.02	0.098	0.043	0.113	0.102	0.141	0.09
	23	0.084	0.287	0.254	0.124	0.023	0.186	0.134	0.204	0.141	0.207	0.102	0.131	0.071	0.156	0.045	0.151	0.081	0.016	0.031	0.069
	25	0.068	0.161	0.165	0.046	0.096	0.211	0.151	0.01	0.095	0.109	0.065	0.011	0.059	0.096	0.079	0.011	0.133	0.054	0.101	0.029
	27	0.045	0.019	0.071	0.111	0.048	0.25	0.128	0.168	0.026	0.113	0.024	0.031	0.12	0.1	0.063	0.041	0.029	0.034	0.028
	29	0.029	0.12	0.093	0.125	0.021	0.256	0.085	0.015	0.01	0.018	0.013	0.021	0.07	0.059	0.019	0.113	0.023	0.014
	31	0.119	0.055	0.006	0.013	0.023	0.014	0.204	0.141	0.066	0.055	0.011	0.035	0.021	0.018	0.014	0.096	0.008
	33	0.056	0.018	0.018	0.016	0.096	0.011	0.046	0.156	0.299	0.014	0.105	0.023	0.019	0.005	0.016	0.021	0.055
	35	0.109	0.016	0.021	0.01	0.058	0.013	0.013	0.031	0.161	0.018	0.023	0.018	0.015	0.005	0.064	0.019	0.018
	39	0.08	0.005	0.165	0.023	0.021	0.011	0.018	0.01	0.005	0.009	0.013	0.015	0.016	0.008	0.006	0.01	0.011
	45	0.073	0.008	0.02	0.02	0.01	0.231	0.016	0.011	0.014
																		Original data (FM)
	Time (days)	slug1	slug2	slug3	slug4	slug5	slug6	slug7	slug8	slug9	slug10	slug11	slug12	slug13	slug14	slug15	slug16	slug17	slug18	slug19	slug20	slug21	slug22	slug23	slug24	slug25	slug26	slug27	slug28	slug29	slug30	slug31	slug32	slug33	slug34	slug35	slug36	slug37	slug38	slug39	slug40	slug41	slug42	slug43	slug44	slug45	slug46	slug47	slug48
	0	0.826	2.558	1.759	1.105	1.17	1.448	2.558	1.421	1.844	0.688	2.111	1.644	1.269	2.329	2.075	2.313	1.789	1.688	1.475	2.558	1.375	1.715	2.039	1.843	0.986	1.724	1.136	1.038	1.754	1.305	1.627	0.639	1.651	1.55	1.354	1.448	0.963	0.588	0.904	1.161	1.442	1.691	0.961	1.083	1.764	1.174	0.978	1.455
	2	2.225	0.968	1.636	1.736	2.314	1.399	1.343	2.558	1.698	1.397	1.67	1.692	1.909	0.983	2.299	1.522	1.169	1.435	1.591	1.446	0.981	0.795	1.052	1.535	1.286	1.034	0.953	1.274	0.955	0.57	1.076	1.245	0.976	1.214	0.671	0.655	1.099	1.041	1.425	1.359
	4	2.086	1.345	0.699	2.556	1.694	1.045	0.979	1.22	1.499	1.179	2.506	1.131	1.364	1.311	2.081	1.121	1.242	1.345	0.753	1.245	1.11	1.421	1.36	1.347	1.356	1.199	1.14	1.276	0.949	1.143	1.127	1.134	0.797	1.262	0.674	1.63	1.198	0.825	1.169	1.07
	5	1.634	1.259	1.055	2.083	1.196	1.331	2.462	1.069	2.558	1.281	0.969	1.038	1.201	1.518	1.739	1.434	2.337	1.376	2.019	0.994	1.069	1.274	1.474	0.966	1.522	0.661	0.966	0.995	0.926	1.194	1.13	1.246	0.873	1.301	0.364	0.627	0.95	1.026	0.97	0.963
	7	1.459	1.021	0.993	0.841	1.736	1.219	2.29	1.433	0.938	1.486	1.323	1.113	2.373	1.45	1.184	1.025	0.79	1.515	1.097	1.25	0.645	1.147	0.914	1.07	1.496	0.642	0.723	0.879	1.629	1.014
	9	1.001	1.327	0.774	0.866	2.526	2.46	1.101	1.899	0.698	0.868	1.145	1.104	1.245	0.864	1.156	1.482	1.124	1.021	0.485	1.12	0.971	1.528	1.479	0.514	0.694	0.724	0.978	1.061	1.036	1.266
	11	1.936	0.746	0.882	1.238	0.7	0.826	1.165	0.996	0.884	0.973	1.1	1.16	1.183	1.201	1.455	0.875	0.946	0.683	0.851	0.551	0.929	1.563	0.97	1.036	1.143	0.464	1.346	1.019	0.677	1.036
	13	1.021	1.035	0.833	1.164	0.591	0.606	1.095	0.61	1.778	1.404	0.897	0.902	0.868	1.209	0.651	0.639	0.949	0.988	0.865	0.574	1.317	0.594	0.613	0.714	1.07	0.685	0.843	0.56	1.002	0.433
	15	1.294	0.505	0.556	1.284	0.904	0.654	1.025	0.642	0.558	0.573	1.141	0.873	1.048	0.429	1.343	0.374	0.464	0.665	0.831	0.615	0.835	0.608	0.296	0.531	0.981	0.886	0.669	0.551	0.581	0.492
	17	0.776	0.726	0.713	0.443	0.51	0.927	0.405	0.376	0.959	0.667	0.647	0.48	0.573	0.53	0.72	0.253	0.489	0.285	0.594	0.657
	19	0.627	0.676	0.514	1.04	0.54	0.779	0.433	0.933	0.228	0.63	0.498	0.329	0.417	0.723	0.688	0.316	0.064	0.522	0.556	0.434
	21	0.664	0.141	1.058	0.436	0.637	0.391	0.472	0.674	0.988	0.438	0.168	0.459	0.345	0.02	0.224	0.079	0.284	0.281	0.476	0.184
	23	0.191	0.794	0.705	0.333	0.039	0.459	0.256	0.464	0.279	0.561	0.241	0.335	0.14	0.47	0.066	0.537	0.188	0.02	0.029	0.153
	25	0.11	0.535	0.465	0.115	0.19	0.593	0.404	0.023	0.231	0.331	0.114	0.025	0.101	0.296	0.161	0.016	0.476	0.12	0.209	0.014
	27	0.125	0.02	0.185	0.344	0.049	0.718	0.319	0.464	0.014	0.156	0.025	0.054	0.359	0.184	0.155	0.051	0.034	0.044	0.016
	29	0.039	0.253	0.196	0.276	0.018	0.604	0.17	0.015	0.01	0.013	0.018	0.03	0.114	0.124	0.03	0.371	0.02	0.014
	31	0.219	0.119	0.01	0.02	0.015	0.013	0.443	0.261	0.101	0.071	0.015	0.055	0.024	0.019	0.014	0.251	0.013
	33	0.085	0.015	0.016	0.013	0.171	0.011	0.073	0.271	0.625	0.013	0.259	0.02	0.015	0.013	0.019	0.035	0.058
	35	0.186	0.014	0.019	0.01	0.087	0.014	0.016	0.041	0.319	0.014	0.024	0.011	0.011	0.013	0.131	0.013	0.019
	39	0.12	0.011	0.27	0.018	0.024	0.011	0.011	0.014	0.009	0.015	0.011	0.014	0.013	0.013	0.011	0.01	0.011
	45	0.086	0.011	0.013	0.014	0.013	0.282	0.014	0.009	0.01
[truncated: 6 more columns]

## Sheet: Fig6E amb timida
		Original data (P700 deltaI/I x10³)									After slope correction in Origin (baseline subtraction tool)									Zero levels								Zero levels set									Maximum at onset of light pulse								Normalized to maximum
Time (ms)	Slug 1	Slug 2	Slug 3	Slug 4	Slug 5	Slug 6	Slug 7		Time (ms)	Slug 1	Slug 2	Slug 3	Slug 4	Slug 5	Slug 6	Slug 7		Slug 1	Slug 2	Slug 3	Slug 4	Slug 5	Slug 6	Slug 7		Time (ms)	Slug 1	Slug 2	Slug 3	Slug 4	Slug 5	Slug 6	Slug 7		Slug 1	Slug 2	Slug 3	Slug 4	Slug 5	Slug 6	Slug 7		Time (ms)	Slug 1	Slug 2	Slug 3	Slug 4	Slug 5	Slug 6
-198.9	0.0863	-0.0215	0.0602	0.052	0.095	0.0312	0.113		-198.9	-6.78438e-05	0	0.00234	-0.0048	-0.00148	-0.00341	-7.62487e-05		-0.00113175	0.00089879	0.00208965	0.000550274	0.00098935	0.00113647	0.00141242		-198.9	0.00106391	-0.00089879	0.000250349	-0.00535027	-0.00246935	-0.00454647	-0.00148867		0.0527642	0.0221188	0.0371649	0.0388176	0.0274428	0.0286981	0.0218488		-198.9	0.0201634	-0.0406347	0.00673616	-0.137831	-0.0899818	-0.158424
-196.8	0.0874	-0.0241	0.0617	0.0534	0.095	0.0314	0.113		-196.8	0.00106	-0.00257	0.00398	-0.00348	-0.00147	-0.00342	-0.000142046										-196.8	0.00219175	-0.00346879	0.00189035	-0.00403027	-0.00245935	-0.00455647	-0.00155447										-196.8	0.0415386	-0.156826	0.0508638	-0.103826	-0.0896174	-0.158773
-194.7	0.0884	-0.0251	0.0628	0.0537	0.0954	0.0321	0.1133		-194.7	0.00208	-0.00354	0.00522	-0.00325	-0.00106	-0.00293	9.21558e-05										-194.7	0.00321175	-0.00443879	0.00313035	-0.00380027	-0.00204935	-0.00406647	-0.00132027										-194.7	0.0608699	-0.20068	0.0842286	-0.0979008	-0.0746772	-0.141698
-192.6	0.0843	-0.024	0.0629	0.056	0.0955	0.032	0.1102		-192.6	-0.00199	-0.00241	0.00546	-0.00103	-0.000955454	-0.00324	-0.00307										-192.6	-0.000858249	-0.00330879	0.00337035	-0.00158027	-0.0019448	-0.00437647	-0.00448242										-192.6	-0.0162658	-0.149592	0.0906864	-0.0407102	-0.0708676	-0.1525
-190.5	0.0843	-0.0198	0.0637	0.0571	0.0969	0.0373	0.1095		-190.5	-0.00196	0.00182	0.0064	0	0.000451124	0.00185	-0.00384										-190.5	-0.000828249	0.00092121	0.00431035	-0.000550274	-0.000538226	0.000713529	-0.00525242										-190.5	-0.0156972	0.0416483	0.115979	-0.0141759	-0.0196127	0.0248633
-188.4	0.0858	-0.0183	0.0604	0.0571	0.0944	0.0366	0.11		-188.4	-0.000438979	0.00335	0.00324	-7.42798e-05	-0.00204	0.000944078	-0.00341										-188.4	0.000692772	0.00245121	0.00115035	-0.000624554	-0.00302935	-0.000192393	-0.00482242										-188.4	0.0131296	0.11082	0.0309526	-0.0160895	-0.110388	-0.00670403
-186.3	0.0838	-0.0205	0.0566	0.0583	0.0981	0.0371	0.108		-186.3	-0.00241	0.00118	-0.0004206	0.00105	0.00166	0.00123	-0.00547										-186.3	-0.00127825	0.00028121	-0.00251025	0.000499726	0.00067065	9.35294e-05	-0.00688242										-186.3	-0.0242257	0.0127136	-0.0675436	0.0128737	0.0244381	0.00325908
-184.2	0.0843	-0.021	0.0522	0.0597	0.0965	0.0364	0.1104		-184.2	-0.00189	0.00071248	-0.00468	0.00238	7.08592e-05	0.000324472	-0.00314										-184.2	-0.000758249	-0.00018631	-0.00676965	0.00182973	-0.000918491	-0.000811999	-0.00455242										-184.2	-0.0143705	-0.00842318	-0.182152	0.0471365	-0.0334693	-0.0282945
-182.1	0.0849	-0.0172	0.0533	0.0608	0.0963	0.0357	0.1124		-182.1	-0.00126	0.00454	-0.00344	0.0034	-0.000122562	-0.000585331	-0.0012										-182.1	-0.000128249	0.00364121	-0.00552965	0.00284973	-0.00111191	-0.0017218	-0.00261242										-182.1	-0.00243061	0.164621	-0.148787	0.0734132	-0.0405175	-0.0599971
-180	0.0845	-0.0212	0.0519	0.0624	0.0928	0.0379	0.1193		-180	-0.00164	0.000573189	-0.0047	0.00493	-0.00362	0.0014	0.00563										-180	-0.000508249	-0.000325601	-0.00678965	0.00437973	-0.00460935	0.000263529	0.00421758										-180	-0.00963247	-0.0147206	-0.18269	0.112828	-0.167962	0.00918282
-177.9	0.0888	-0.0176	0.0542	0.0628	0.0937	0.0341	0.1191		-177.9	0.00269	0.0042	-0.00226	0.00525	-0.00271	-0.0026	0.00537										-177.9	0.00382175	0.00330121	-0.00434965	0.00469973	-0.00369935	-0.00373647	0.00395758										-177.9	0.0724308	0.149249	-0.117037	0.121072	-0.134802	-0.130199
-175.8	0.0908	-0.0157	0.0516	0.0588	0.0978	0.0355	0.118		-175.8	0.00472	0.00613	-0.00472	0.00118	0.0014	-0.00141	0.0042										-175.8	0.00585175	0.00523121	-0.00680965	0.000629726	0.00041065	-0.00254647	0.00278758										-175.8	0.110904	0.236505	-0.183228	0.0162227	0.0149639	-0.0887332
-173.7	0.0885	-0.0163	0.0531	0.0614	0.0972	0.036	0.1166		-173.7	0.00244	0.00556	-0.00308	0.00371	0.000803751	-0.00112	0.00273										-173.7	0.00357175	0.00466121	-0.00516965	0.00315973	-0.000185599	-0.00225647	0.00131758										-173.7	0.0676927	0.210735	-0.1391	0.0813993	-0.00676313	-0.0786279
-171.6	0.0847	-0.0144	0.0527	0.0654	0.0987	0.0367	0.1144		-171.6	-0.00133	0.00749	-0.00334	0.00763	0.00231	-0.000634346	0.000468381										-171.6	-0.000198249	0.00659121	-0.00542965	0.00707973	0.00132065	-0.00177082	-0.000944042										-171.6	-0.00375727	0.297991	-0.146096	0.182384	0.0481238	-0.0617051
-169.5	0.088	-0.0124	0.0549	0.0608	0.0974	0.04	0.1102		-169.5	0.00199	0.00952	-0.000996905	0.00296	0.00102	0.00246	-0.0038										-169.5	0.00312175	0.00862121	-0.00308656	0.00240973	3.06499e-05	0.00132353	-0.00521242										-169.5	0.0591642	0.389769	-0.0830503	0.0620782	0.00111687	0.0461191
-167.4	0.0881	-0.0152	0.0584	0.0613	0.0949	0.0378	0.1124		-167.4	0.00212	0.00676	0.00264	0.00338	-0.00148	4.60485e-05	-0.00166										-167.4	0.00325175	0.00586121	0.000550349	0.00282973	-0.00246935	-0.00109042	-0.00307242										-167.4	0.061628	0.264988	0.0148083	0.072898	-0.0899818	-0.0379964
-165.3	0.0864	-0.0185	0.0545	0.0592	0.0942	0.0378	0.1116		-165.3	0.000444523	0.00349	-0.00112	0.00121	-0.00217	-0.000163754	-0.00253										-165.3	0.00157627	0.00259121	-0.00320965	0.000659726	-0.00315935	-0.00130022	-0.00394242										-165.3	0.0298739	0.11715	-0.0863625	0.0169955	-0.115125	-0.045307
-163.2	0.0862	-0.0245	0.0558	0.0588	0.0934	0.0378	0.1127		-163.2	0.000270296	-0.00248	0.000324481	0.000734363	-0.00296	-0.000373557	-0.00149										-163.2	0.00140205	-0.00337879	-0.00176517	0.000184089	-0.00394935	-0.00151003	-0.00290242										-163.2	0.0265719	-0.152757	-0.0474956	0.00474241	-0.143912	-0.0526177
-161.1	0.0849	-0.0214	0.0607	0.0571	0.0945	0.037	0.1209		-161.1	-0.001	0.000646377	0.00536	-0.00104	-0.00186	-0.00138	0.00664										-161.1	0.000131751	-0.000252413	0.00327035	-0.00159027	-0.00284935	-0.00251647	0.00522758										-161.1	0.00249697	-0.0114117	0.0879956	-0.0409679	-0.103829	-0.0876878
-159	0.0877	-0.0194	0.0634	0.0502	0.0971	0.04	0.1204		-159	0.00182	0.00268	0.00821	-0.00801	0.000749799	0.00141	0.00607										-159	0.00295175	0.00178121	0.00612035	-0.00856027	-0.000239551	0.000273529	0.00465758										-159	0.0559423	0.0805293	0.164681	-0.220526	-0.00872911	0.00953128
-156.9	0.0862	-0.0235	0.0635	0.0506	0.0978	0.0376	0.118		-156.9	0.000347615	-0.00139	0.00845	-0.00769	0.00146	-0.0012	0.00361										-156.9	0.00147937	-0.00228879	0.00636035	-0.00824027	0.00047065	-0.00233647	0.00219758										-156.9	0.0280373	-0.103477	0.171139	-0.212282	0.0171502	-0.0814156
-154.8	0.0833	-0.019	0.0649	0.0531	0.0999	0.0364	0.1163		-154.8	-0.00253	0.00314	0.00999	-0.00526	0.00356	-0.00261	0.00184										-154.8	-0.00139825	0.00224121	0.00790035	-0.00581027	0.00257065	-0.00374647	0.000427577										-154.8	-0.0265	0.101326	0.212576	-0.149681	0.0936731	-0.130548
-152.7	0.0826	-0.017	0.0597	0.0545	0.1012	0.0348	0.1121		-152.7	-0.0032	0.00517	0.00493	-0.00394	0.00487	-0.00442	-0.00242										-152.7	-0.00206825	0.00427121	0.00284035	-0.00449027	0.00388065	-0.00555647	-0.00383242										-152.7	-0.039198	0.193103	0.0764256	-0.115676	0.141409	-0.193618
-150.6	0.0806	-0.018	0.0609	0.0633	0.0967	0.0383	0.1113		-150.6	-0.00518	0.0042	0.00627	0.00479	0.000376112	-0.00113	-0.00329										-150.6	-0.00404825	0.00330121	0.00418035	0.00423973	-0.000613238	-0.00226647	-0.00470242										-150.6	-0.0767234	0.149249	0.112481	0.109222	-0.0223461	-0.0789764
-148.5	0.0808	-0.0198	0.0527	0.0614	0.0938	0.041	0.1101		-148.5	-0.00495	0.00243	-0.00179	0.00281	-0.00252	0.00136	-0.00456										-148.5	-0.00381825	0.00153121	-0.00387965	0.00225973	-0.00350935	0.000223529	-0.00597242										-148.5	-0.0723644	0.0692267	-0.10439	0.0582139	-0.127879	0.007789
-146.4	0.0808	-0.0242	0.0535	0.0609	0.0938	0.0407	0.1105		-146.4	-0.00492	-0.00194	-0.000851824	0.00224	-0.00251	0.000848019	-0.00422										-146.4	-0.00378825	-0.00283879	-0.00294148	0.00168973	-0.00349935	-0.000288452	-0.00563242										-146.4	-0.0717959	-0.128343	-0.0791466	0.0435299	-0.127514	-0.0100513
-144.3	0.0833	-0.0241	0.0494	0.0614	0.0905	0.0416	0.1173		-144.3	-0.0024	-0.00181	-0.00481	0.00267	-0.0058	0.00154	0.00251										-144.3	-0.00126825	-0.00270879	-0.00689965	0.00211973	-0.00678935	0.000403529	0.00109758										-144.3	-0.0240362	-0.122466	-0.18565	0.0546073	-0.2474	0.0140612
-142.2	0.0822	-0.0256	0.0487	0.0599	0.0951	0.0404	0.1194		-142.2	-0.00347	-0.00328	-0.00537	0.00109	-0.0012	0.000128413	0.00455										-142.2	-0.00233825	-0.00417879	-0.00745965	0.000539726	-0.00218935	-0.00100806	0.00313758										-142.2	-0.0443151	-0.188925	-0.200718	0.0139042	-0.0797788	-0.0351263
-140.1	0.0831	-0.0249	0.054	0.0611	0.0956	0.0406	0.122		-140.1	-0.00255	-0.00255	6.95615e-05	0.00222	-0.000690997	0.000118611	0.00708										-140.1	-0.00141825	-0.00344879	-0.00202009	0.00166973	-0.00168035	-0.00101786	0.00566758										-140.1	-0.026879	-0.155921	-0.0543548	0.0430147	-0.061231	-0.0354679
-138	0.0866	-0.0235	0.0549	0.0584	0.0981	0.0402	0.1218		-138	0.000979571	-0.00112	0.00111	-0.000556995	0.00182	-0.000491192	0.00682										-138	0.00211132	-0.00201879	-0.000979651	-0.00110727	0.00083065	-0.00162766	0.00540758										-138	0.0400143	-0.0912704	-0.0263596	-0.0285249	0.0302684	-0.0567168
-135.9	0.0848	-0.0217	0.0537	0.0626	0.0983	0.0434	0.117		-135.9	-0.000794656	0.000710629	5.04852e-05	0.00357	0.00202	0.0025	0.00195										-135.9	0.000337095	-0.000188161	-0.00203917	0.00301973	0.00103065	0.00136353	0.000537577										-135.9	0.0063887	-0.00850686	-0.0548681	0.0777927	0.0375563	0.0475129
-133.8	0.0844	-0.0204	0.0567	0.0628	0.0993	0.0394	0.1157		-133.8	-0.00117	0.00204	0.00319	0.00369	0.00303	-0.00171	0.000584021										-133.8	-3.82494e-05	0.00114121	0.00110035	0.00313973	0.00204065	-0.00284647	-0.000828402										-133.8	-0.000724912	0.0515946	0.0296072	0.0808841	0.0743602	-0.0991868
-131.7	0.0824	-0.0164	0.0529	0.0649	0.0992	0.0419	0.1172		-131.7	-0.00314	0.00607	-0.000468591	0.00572	0.00294	0.000579399	0.00202										-131.7	-0.00200825	0.00517121	-0.00255824	0.00516973	0.00195065	-0.000557072	0.000607577										-131.7	-0.0380609	0.233793	-0.0688349	0.13318	0.0710806	-0.0194115
-129.6	0.0845	-0.0173	0.0505	0.0636	0.0971	0.0449	0.1149		-129.6	-0.00102	0.0052	-0.00273	0.00435	0.000841895	0.00337	-0.000347575										-129.6	0.000111751	0.00430121	-0.00481965	0.00379973	-0.000147455	0.00223353	-0.00176										-129.6	0.00211793	0.19446	-0.129683	0.0978867	-0.00537318	0.0778285
-127.5	0.0822	-0.0238	0.0529	0.0583	0.0934	0.0456	0.1166		-127.5	-0.00329	-0.00127	-0.000187667	-0.00103	-0.00285	0.00386	0.00129										-127.5	-0.00215825	-0.00216879	-0.00227732	-0.00158027	-0.00383935	0.00272353	-0.000122423										-127.5	-0.0409037	-0.098052	-0.0612761	-0.0407102	-0.139904	0.0949029
-125.4	0.0817	-0.027	0.0552	0.0577	0.0961	0.0436	0.117		-125.4	-0.00377	-0.00444	0.00225	-0.0017	-0.000144949	0.00165	0.00162										-125.4	-0.00263825	-0.00533879	0.000160349	-0.00225027	-0.0011343	0.000513529	0.000207577										-125.4	-0.0500008	-0.241369	0.00431452	-0.0579705	-0.0413333	0.0178942
-123.3	0.082	-0.0227	0.054	0.0595	0.0976	0.0429	0.117		-123.3	-0.00344	-0.000107246	0.00119	2.30464e-05	0.00136	0.000740187	0.00156										-123.3	-0.00230825	-0.00100604	-0.000899651	-0.000527228	0.00037065	-0.000396284	0.000147577										-123.3	-0.0437465	-0.0454833	-0.024207	-0.0135822	0.0135063	-0.0138087
-121.2	0.0836	-0.0262	0.057	0.0598	0.0992	0.0427	0.1215		-121.2	-0.00181	-0.00358	0.00433	0.000248767	0.00297	0.000330384	0.00599										-121.2	-0.000678249	-0.00447879	0.00224035	-0.000301507	0.00198065	-0.000806087	0.00457758										-121.2	-0.0128544	-0.202488	0.0602813	-0.00776728	0.0721738	-0.0280885
-119.1	0.0856	-0.025	0.0605	0.0606	0.1019	0.0426	0.1207		-119.1	0.000211528	-0.00235	0.00797	0.000974487	0.00567	2.05813e-05	0.00512										-119.1	0.00134328	-0.00324879	0.00588035	0.000424213	0.00468065	-0.00111589	0.00370758										-119.1	0.0254582	-0.146879	0.158223	0.0109284	0.17056	-0.0388838
-117	0.0891	-0.0257	0.0585	0.0613	0.1023	0.0434	0.12		-117	0.00374	-0.00302	0.00611	0.0016	0.00608	0.000610778	0.00436										-117	0.00487175	-0.00391879	0.00402035	0.00104973	0.00509065	-0.000525693	0.00294758										-117	0.0923307	-0.17717	0.108176	0.0270425	0.185501	-0.018318
-114.9	0.0841	-0.0217	0.0564	0.0587	0.1018	0.0397	0.1171		-114.9	-0.00124	0.00101	0.00416	-0.00107	0.00559	-0.0033	0.00139										-114.9	-0.000108249	0.00011121	0.00207035	-0.00162027	0.00460065	-0.00443647	-2.24228e-05										-114.9	-0.00205157	0.00502783	0.0557071	-0.0417407	0.167645	-0.154591
-112.8	0.0797	-0.0217	0.0562	0.0587	0.0943	0.0438	0.115		-112.8	-0.00561	0.00104	0.0041	-0.00115	-0.00191	0.000591173	-0.000773957										-112.8	-0.00447825	0.00014121	0.00201035	-0.00170027	-0.00289935	-0.000545298	-0.00218638										-112.8	-0.0848729	0.00638415	0.0540927	-0.0438016	-0.105651	-0.0190012
-110.7	0.0802	-0.023	0.0544	0.0559	0.0972	0.0455	0.1158		-110.7	-0.00509	-0.00022512	0.00244	-0.00402	0.001	0.00208	-3.97544e-05										-110.7	-0.00395825	-0.00112391	0.000350349	-0.00457027	1.06499e-05	0.000943529	-0.00145218										-110.7	-0.0750177	-0.0508125	0.00942687	-0.117737	0.000388077	0.0328778
-108.6	0.0824	-0.0206	0.0533	0.0564	0.0976	0.0454	0.1181		-108.6	-0.00286	0.00221	0.00148	-0.0036	0.00141	0.00177	0.00219										-108.6	-0.00172825	0.00131121	-0.000609651	-0.00415027	0.00042065	0.000633529	0.000777577										-108.6	-0.0327542	0.0592804	-0.016404	-0.106917	0.0153283	0.0220757
-106.5	0.0857	-0.0237	0.054	0.0573	0.0976	0.0451	0.1177		-106.5	0.000466165	-0.000864412	0.00232	-0.00277	0.00141	0.00126	0.00173										-106.5	0.00159792	-0.0017632	0.000230349	-0.00332027	0.00042065	0.000123529	0.000317577										-106.5	0.0302841	-0.0797152	0.00619802	-0.0855353	0.0153283	0.00430445
-104.4	0.0826	-0.0271	0.0524	0.0587	0.0951	0.0447	0.1181		-104.4	-0.00261	-0.00423	0.000857413	-0.00145	-0.00108	0.000651961	0.00206										-104.4	-0.00147825	-0.00512879	-0.00123224	-0.00200027	-0.00206935	-0.00048451	0.000647577										-104.4	-0.0280162	-0.231875	-0.033156	-0.0515301	-0.075406	-0.016883
-102.3	0.0812	-0.0302	0.0502	0.0626	0.0952	0.0462	0.1226		-102.3	-0.00398	-0.0073	-0.0012	0.00238	-0.000972588	0.00194	0.0065										-102.3	-0.00284825	-0.00819879	-0.00328965	0.00182973	-0.00196194	0.000803529	0.00508758										-102.3	-0.0539807	-0.370671	-0.088515	0.0471365	-0.071492	0.0279994
-100.2	0.0794	-0.0271	0.0549	0.0665	0.0935	0.0462	0.1193		-100.2	-0.00576	-0.00417	0.00364	0.00621	-0.00267	0.00173	0.00313										-100.2	-0.00462825	-0.00506879	0.00155035	0.00565973	-0.00365935	0.000593529	0.00171758										-100.2	-0.0877158	-0.229162	0.0417154	0.145803	-0.133345	0.0206819
-98.1	0.0815	-0.0276	0.0527	0.0654	0.0967	0.0483	0.1201		-98.1	-0.00363	-0.00464	0.00158	0.00503	0.000540569	0.00362	0.00387										-98.1	-0.00249825	-0.00553879	-0.000509651	0.00447973	-0.000448781	0.00248353	0.00245758										-98.1	-0.0473475	-0.250411	-0.0137132	0.115404	-0.0163533	0.0865399
-96	0.0791	-0.0247	0.0524	0.0657	0.0963	0.0508	0.1235		-96	-0.006	-0.00171	0.00142	0.00526	0.000147147	0.00591	0.0072										-96	-0.00486825	-0.00260879	-0.000669651	0.00470973	-0.000842203	0.00477353	0.00578758										-96	-0.0922643	-0.117945	-0.0180184	0.12133	-0.0306894	0.166336
-93.9	0.0791	-0.0244	0.0509	0.0638	0.0985	0.0487	0.1202		-93.9	-0.00598	-0.00138	5.97228e-05	0.00328	0.00235	0.0036	0.00383										-93.9	-0.00484825	-0.00227879	-0.00202993	0.00272973	0.00136065	0.00246353	0.00241758										-93.9	-0.0918852	-0.103025	-0.0546195	0.0703219	0.0495814	0.085843
-91.8	0.0813	-0.0247	0.0488	0.0623	0.0964	0.0497	0.1193		-91.8	-0.00375	-0.00165	-0.0019	0.00171	0.000260304	0.00439	0.00287										-91.8	-0.00261825	-0.00254879	-0.00398965	0.00115973	-0.000729046	0.00325353	0.00145758										-91.8	-0.0496217	-0.115232	-0.10735	0.0298763	-0.0265661	0.113371
-89.7	0.0862	-0.0227	0.0537	0.06	0.098	0.0501	0.1187		-89.7	0.00117	0.000378423	0.00314	-0.00066543	0.00187	0.00458	0.0022										-89.7	0.00230175	-0.000520367	0.00105035	-0.0012157	0.00088065	0.00344353	0.000787577										-89.7	0.0436234	-0.023526	0.0282618	-0.0313184	0.0320904	0.119992
-87.6	0.0866	-0.024	0.0544	0.0617	0.0979	0.0529	0.1174		-87.6	0.0016	-0.000891223	0.00398	0.00096029	0.00177	0.00717	0.00083647										-87.6	0.00273175	-0.00179001	0.00189035	0.000410016	0.00078065	0.00603353	-0.000575953										-87.6	0.0517728	-0.0809273	0.0508638	0.0105626	0.0284465	0.210242
-85.5	0.085	-0.0288	0.0549	0.0651	0.0958	0.0513	0.1169		-85.5	2.38947e-05	-0.00566	0.00462	0.00429	-0.000319961	0.00536	0.000270672										-85.5	0.00115565	-0.00655879	0.00253035	0.00373973	-0.00130931	0.00422353	-0.00114175										-85.5	0.0219021	-0.296526	0.0680844	0.096341	-0.0477106	0.147171
-83.4	0.0845	-0.0271	0.0538	0.0678	0.0962	0.0516	0.1177		-83.4	-0.000450332	-0.00393	0.00366	0.00691	8.66168e-05	0.00545	0.001										-83.4	0.000681419	-0.00482879	0.00157035	0.00635973	-0.000902733	0.00431353	-0.000412423										-83.4	0.0129144	-0.218312	0.0422535	0.163836	-0.0328951	0.150307
-81.3	0.0854	-0.027	0.055	0.0608	0.0974	0.0488	0.1161		-81.3	0.000475441	-0.0038	0.005	-0.00016255	0.00129	0.00244	-0.000660923										-81.3	0.00160719	-0.00469879	0.00291035	-0.000712824	0.00030065	0.00130353	-0.00207335										-81.3	0.0304599	-0.212434	0.0783091	-0.0183634	0.0109555	0.0454222
-79.2	0.0863	-0.024	0.0531	0.0614	0.0963	0.0466	0.1212		-79.2	0.0014	-0.000769806	0.00324	0.000363171	0.000199773	3.43257e-05	0.00437										-79.2	0.00253175	-0.0016686	0.00115035	-0.000187103	-0.000789577	-0.00110214	0.00295758										-79.2	0.0479824	-0.075438	0.0309526	-0.00482006	-0.0287718	-0.0384048
-77.1	0.0885	-0.0195	0.0566	0.0559	0.099	0.0493	0.1209		-77.1	0.00363	0.00376	0.00688	-0.00521	0.00291	0.00252	0.00401										-77.1	0.00476175	0.00286121	0.00479035	-0.00576027	0.00192065	0.00138353	0.00259758										-77.1	0.0902459	0.129357	0.128894	-0.148393	0.0699875	0.0482098
-75	0.0865	-0.0188	0.0528	0.0567	0.0988	0.0484	0.1202		-75	0.00165	0.00449	0.00322	-0.00449	0.00271	0.00141	0.00324										-75	0.00278175	0.00359121	0.00113035	-0.00504027	0.00172065	0.000273529	0.00182758										-75	0.0527204	0.16236	0.0304144	-0.129845	0.0626996	0.00953128
-72.9	0.0827	-0.0204	0.0547	0.06	0.0959	0.0508	0.1219		-72.9	-0.00212	0.00292	0.00526	-0.00126	-0.000180492	0.0036	0.00488										-72.9	-0.000988249	0.00202121	0.00317035	-0.00181027	-0.00116984	0.00246353	0.00346758										-72.9	-0.0187296	0.0913798	0.0853049	-0.0466354	-0.0426284	0.085843
-70.8	0.0838	-0.0197	0.0543	0.0617	0.0967	0.0515	0.1181		-70.8	-0.000995695	0.00365	0.005	0.000366051	0.000626087	0.0041	0.00101										-70.8	0.000136056	0.00275121	0.00291035	-0.000184223	-0.000363263	0.00296353	-0.000402423										-70.8	0.00257856	0.124383	0.0783091	-0.00474587	-0.0132371	0.103266
-68.7	0.0827	-0.0202	0.0542	0.0626	0.094	0.0544	0.1156		-68.7	-0.00207	0.00318	0.00505	0.00119	-0.00207	0.00679	-0.00156										-68.7	-0.000938249	0.00228121	0.00296035	0.000639726	-0.00305935	0.00565353	-0.00297242										-68.7	-0.0177819	0.103134	0.0796544	0.0164803	-0.111481	0.197
-66.6	0.0844	-0.0252	0.0537	0.065	0.0977	0.0521	0.1157		-66.6	-0.000344149	-0.00179	0.00469	0.00352	0.00164	0.00428	-0.00152										-66.6	0.000787602	-0.00268879	0.00260035	0.00296973	0.00065065	0.00314353	-0.00293242										-66.6	0.0149268	-0.121561	0.0699679	0.0765046	0.0237093	0.109538
-64.5	0.0817	-0.0237	0.0493	0.0631	0.094	0.0522	0.1157		-64.5	-0.00302	-0.000257326	0.000426189	0.00154	-0.00205	0.00417	-0.00159										-64.5	-0.00188825	-0.00115612	-0.00166346	0.000989726	-0.00303935	0.00303353	-0.00300242										-64.5	-0.0357866	-0.0522685	-0.044759	0.0254968	-0.110752	0.105705
-62.4	0.0812	-0.0222	0.0491	0.0666	0.0917	0.0534	0.1201		-62.4	-0.00349	0.00127	0.000366651	0.00497	-0.00435	0.00516	0.00275										-62.4	-0.00235825	0.00037121	-0.001723	0.00441973	-0.00533935	0.00402353	0.00133758										-62.4	-0.0446941	0.0167825	-0.046361	0.113859	-0.194563	0.140202
-60.3	0.0826	-0.0165	0.0483	0.0663	0.0945	0.0528	0.1247		-60.3	-0.00207	0.007	-0.000292887	0.00459	-0.00154	0.00435	0.00728										-60.3	-0.000938249	0.00610121	-0.00238254	0.00403973	-0.00252935	0.00321353	0.00586758										-60.3	-0.0177819	0.275838	-0.0641072	0.104069	-0.0921682	0.111977
-58.2	0.0851	-0.0195	0.0434	0.0622	0.0972	0.0498	0.1231		-58.2	0.000458943	0.00403	-0.00505	0.000420373	0.00117	0.00114	0.00562										-58.2	0.00159069	0.00313121	-0.00713965	-0.000129901	0.00018065	3.52938e-06	0.00420758										-58.2	0.0301472	0.141563	-0.192107	-0.00334645	0.00658279	0.000122983
-56.1	0.0843	-0.0194	0.0448	0.0606	0.1006	0.0512	0.1271		-56.1	-0.000315284	0.00416	-0.00351	-0.00125	0.00457	0.00233	0.00955										-56.1	0.000816467	0.00326121	-0.00559965	-0.00180027	0.00358065	0.00119353	0.00813758										-56.1	0.0154739	0.147441	-0.15067	-0.0463778	0.130477	0.0415892
-54	0.0795	-0.019	0.0419	0.0616	0.1027	0.0529	0.1249		-54	-0.00509	0.00459	-0.00627	-0.000328187	0.00668	0.00382	0.00728										-54	-0.00395825	0.00369121	-0.00835965	-0.000878461	0.00569065	0.00268353	0.00586758										-54	-0.0750177	0.166881	-0.224934	-0.0226305	0.207364	0.093509
-51.9	0.0787	-0.017	0.045	0.0655	0.0999	0.0512	0.118		-51.9	-0.00586	0.00662	-0.00303	0.0035	0.00389	0.00191	0.000317908										-51.9	-0.00472825	0.00572121	-0.00511965	0.00294973	0.00290065	0.000773529	-0.00109451										-51.9	-0.089611	0.258658	-0.137755	0.0759894	0.105698	0.0269541
-49.8	0.0765	-0.0174	0.0502	0.0671	0.0935	0.0545	0.1186		-49.8	-0.00804	0.00626	0.00231	0.00502	-0.00251	0.005	0.000852111										-49.8	-0.00690825	0.00536121	0.000220349	0.00446973	-0.00349935	0.00386353	-0.000560312										-49.8	-0.130927	0.242383	0.00592894	0.115147	-0.127514	0.134627
-47.7	0.0812	-0.0217	0.0507	0.0658	0.0945	0.0526	0.1192		-47.7	-0.00331	0.00199	0.00295	0.00365	-0.0015	0.00289	0.00139										-47.7	-0.00217825	0.00109121	0.000860349	0.00309973	-0.00248935	0.00175353	-2.24228e-05										-47.7	-0.0412827	0.0493341	0.0231495	0.0798536	-0.0907106	0.0611027
-45.6	0.0836	-0.0223	0.0516	0.0641	0.0986	0.0499	0.1165		-45.6	-0.00088642	0.00142	0.00399	0.00187	0.00261	-2.2521e-05	-0.00138										-45.6	0.000245331	0.00052121	0.00190035	0.00131973	0.00162065	-0.00115899	-0.00279242										-45.6	0.00464957	0.0235641	0.0511329	0.0339981	0.0590556	-0.0403857
-43.5	0.0833	-0.0221	0.0497	0.0607	0.0961	0.051	0.1199		-43.5	-0.00116	0.00165	0.00223	-0.0016	0.000111604	0.000867676	0.00195										-43.5	-2.82494e-05	0.00075121	0.000140349	-0.00215027	-0.000877746	-0.000268795	0.000537577										-43.5	-0.00053539	0.0339625	0.00377638	-0.0553943	-0.0319846	-0.00936629
-41.4	0.0826	-0.0226	0.0555	0.0615	0.0986	0.0495	0.1213		-41.4	-0.00183	0.00118	0.00817	-0.000873866	0.00262	-0.000842127	0.00329										-41.4	-0.000698249	0.00028121	0.00608035	-0.00142414	0.00163065	-0.0019786	0.00187758										-41.4	-0.0132334	0.0127136	0.163605	-0.036688	0.05942	-0.0689453
-39.3	0.0854	-0.0219	0.0554	0.0604	0.1033	0.0512	0.1219		-39.3	0.000990899	0.00191	0.00821	-0.00205	0.00732	0.00064807	0.00382										-39.3	0.00212265	0.00101121	0.00612035	-0.00260027	0.00633065	-0.000488401	0.00240758										-39.3	0.040229	0.0457172	0.164681	-0.066987	0.230686	-0.0170186
-37.2	0.0864	-0.0221	0.0545	0.0578	0.1064	0.053	0.1235		-37.2	0.00202	0.00174	0.00745	-0.00472	0.01043	0.00224	0.00536										-37.2	0.00315175	0.00084121	0.00536035	-0.00527027	0.00944065	0.00110353	0.00394758										-37.2	0.0597328	0.0380315	0.144232	-0.13577	0.344012	0.0384531
-35.1	0.0835	-0.0251	0.05	0.0593	0.1024	0.0543	0.1191		-35.1	-0.000857555	-0.00123	0.00309	-0.0033	0.00644	0.00333	0.000891526										-35.1	0.000274196	-0.00212879	0.00100035	-0.00385027	0.00545065	0.00219353	-0.000520897										-35.1	0.00519662	-0.0962436	0.0269165	-0.0991889	0.198619	0.0764347
-33	0.0857	-0.024	0.0495	0.0617	0.1005	0.0531	0.1191		-33	0.00137	-0.000102012	0.00273	-0.000970985	0.00454	0.00192	0.000825729										-33	0.00250175	-0.0010008	0.000640349	-0.00152126	0.00355065	0.000783529	-0.000586694										-33	0.0474138	-0.0452467	0.0172299	-0.0391899	0.129384	0.0273025
-30.9	0.08	-0.0223	0.051	0.0611	0.0967	0.0493	0.1169		-30.9	-0.00431	0.00163	0.00437	-0.00165	0.000751074	-0.00209	-0.00144										-30.9	-0.00317825	0.00073121	0.00228035	-0.00220027	-0.000238276	-0.00322647	-0.00285242										-30.9	-0.060235	0.0330583	0.0613576	-0.0566824	-0.00868265	-0.112428
-28.8	0.0842	-0.0227	0.0474	0.0602	0.0969	0.052	0.1142		-28.8	-8.02361e-05	0.00126	0.000914041	-0.00262	0.000957652	0.000399056	-0.00421										-28.8	0.00105151	0.00036121	-0.00117561	-0.00317027	-3.16981e-05	-0.000737415	-0.00562242										-28.8	0.0199286	0.0163304	-0.0316323	-0.081671	-0.00115506	-0.0256956
-26.7	0.0848	-0.0263	0.0534	0.0567	0.0958	0.0543	0.118		-26.7	0.000545537	-0.00231	0.00705	-0.00619	-0.00013577	0.00249	-0.000471665										-26.7	0.00167729	-0.00320879	0.00496035	-0.00674027	-0.00112512	0.00135353	-0.00188409										-26.7	0.0317884	-0.145071	0.133469	-0.17364	-0.0409988	0.0471645
-24.6	0.0829	-0.027	0.0491	0.0529	0.097	0.0514	0.1201		-24.6	-0.00133	-0.00298	0.00289	-0.01007	0.00107	-0.00062055	0.00156										-24.6	-0.000198249	-0.00387879	0.000800349	-0.0106203	8.06499e-05	-0.00175702	0.000147577										-24.6	-0.00375727	-0.175362	0.0215351	-0.273594	0.00293884	-0.0612243
-22.5	0.0831	-0.0193	0.0537	0.0598	0.0965	0.0502	0.1209		-22.5	-0.0011	0.00475	0.00764	-0.00324	0.000577387	-0.00203	0.0023										-22.5	3.17506e-05	0.00385121	0.00555035	-0.00379027	-0.000411963	-0.00316647	0.000887577										-22.5	0.000601746	0.174115	0.149344	-0.0976432	-0.0150117	-0.110337
-20.4	0.0856	-0.0228	0.053	0.0631	0.0979	0.0556	0.1234		-20.4	0.00142	0.00128	0.00708	-1.66637e-05	0.00198	0.00316	0.00473										-20.4	0.00255175	0.00038121	0.00499035	-0.000566938	0.00099065	0.00202353	0.00331758										-20.4	0.0483614	0.0172347	0.134276	-0.0146052	0.0360988	0.070511
-18.3	0.0847	-0.022	0.053	0.0672	0.0985	0.0531	0.1243		-18.3	0.000548629	0.00211	0.00722	0.00401	0.00259	0.000450041	0.00557										-18.3	0.00168038	0.00121121	0.00513035	0.00345973	0.00160065	-0.00068643	0.00415758										-18.3	0.031847	0.0547593	0.138043	0.0891278	0.0583268	-0.023919
-16.2	0.0838	-0.0272	0.0452	0.0659	0.0987	0.0542	0.1221		-16.2	-0.0003082	-0.00307	-0.000443188	0.00263	0.0028	0.00134	0.00329										-16.2	0.000823551	-0.00396879	-0.00253284	0.00207973	0.00181065	0.000203529	0.00187758										-16.2	0.0156081	-0.179431	-0.0681514	0.0535769	0.0659791	0.00709209
-14.1	0.0823	-0.025	0.0419	0.0664	0.0931	0.0542	0.1185		-14.1	-0.00174	-0.000880707	-0.0036	0.00306	-0.0028	0.00113	-0.000436636										-14.1	-0.000608249	-0.0017795	-0.00568965	0.00250973	-0.00378935	-6.47062e-06	-0.00184906										-14.1	-0.0115277	-0.0804519	-0.153092	0.0646543	-0.138082	-0.000225472
-12	0.0815	-0.0242	0.0421	0.068	0.094	0.0533	0.1171		-12	-0.00247	-8.72833e-05	-0.00327	0.00459	-0.00188	2.06322e-05	-0.00196										-12	-0.00133825	-0.000986074	-0.00535965	0.00403973	-0.00286935	-0.00111584	-0.00337242										-12	-0.0253628	-0.0445808	-0.144213	0.104069	-0.104558	-0.038882
-9.9	0.0857	-0.0233	0.0415	0.0647	0.0954	0.0516	0.1177		-9.9	0.0018	0.00080614	-0.00376	0.00121	-0.000460723	-0.00189	-0.00148										-9.9	0.00293175	-9.26504e-05	-0.00584965	0.000659726	-0.00145007	-0.00302647	-0.00289242										-9.9	0.0555633	-0.00418877	-0.157397	0.0169955	-0.0528399	-0.105459
-7.8	0.0879	-0.0229	0.0464	0.0628	0.0985	0.0517	0.1157		-7.8	0.00407	0.0012	0.00126	-0.000710536	0.00266	-0.00191	-0.0036										-7.8	0.00520175	0.00030121	-0.000829651	-0.00126081	0.00167065	-0.00304647	-0.00501242										-7.8	0.0985849	0.0136178	-0.0223235	-0.0324804	0.0608776	-0.106156
-5.7	0.0854	-0.0231	0.0494	0.0624	0.1029	0.0552	0.1181		-5.7	0.00164	0.000992988	0.00438	-0.00108	0.00708	0.00152	-0.00133										-5.7	0.00277175	9.41976e-05	0.00229035	-0.00163027	0.00609065	0.000383529	-0.00274242										-5.7	0.0525309	0.00425871	0.0616267	-0.0419983	0.22194	0.0133643
-3.6	0.0859	-0.0201	0.0502	0.0633	0.1052	0.0528	0.1169		-3.6	0.0022	0.00399	0.00529	-0.000155011	0.00941	-0.000955819	-0.00265										-3.6	0.00333175	0.00309121	0.00320035	-0.000705285	0.00842065	-0.00209229	-0.00406242										-3.6	0.0631442	0.139755	0.0861121	-0.0181692	0.306844	-0.072907
-1.5	0.0851	-0.019	0.0557	0.0679	0.1023	0.0554	0.1163		-1.5	0.00147	0.00508	0.01091	0.00447	0.00653	0.00157	-0.00337										-1.5	0.00260175	0.00418121	0.00882035	0.00391973	0.00554065	0.000433529	-0.00478242										-1.5	0.049309	0.189034	0.23733	0.100978	0.201898	0.0151066
0.6	0.1036	-0.0085	0.0707	0.0859	0.1118	0.0711	0.1343		0.6	0.02004	0.01557	0.02602	0.0225	0.01605	0.0172	0.01451										0.6	0.0211718	0.0146712	0.0239303	0.0219497	0.0150606	0.0160635	0.0130976										0.6	0.401252	0.663292	0.643897	0.565458	0.548802	0.559742
2.7	0.1231	-0.0079	0.0808	0.0999	0.1176	0.0833	0.1406		2.7	0.03961	0.01617	0.03624	0.03653	0.02187	0.02932	0.02069										2.7	0.0407418	0.0152712	0.0341503	0.0359797	0.0208806	0.0281835	0.0192776										2.7	0.772148	0.690418	0.918887	0.926892	0.76088	0.98207
4.8	0.1262	-0.0072	0.0793	0.097	0.1197	0.0813	0.1414		4.8	0.04278	0.01686	0.03486	0.03366	0.02399	0.02725	0.02136										4.8	0.0439118	0.0159612	0.0327703	0.0331097	0.0230006	0.0261135	0.0199476										4.8	0.832227	0.721613	0.881755	0.852956	0.838131	0.90994
6.9	0.1295	-0.0066	0.0762	0.0959	0.1204	0.0843	0.1423		6.9	0.04615	0.01745	0.03187	0.03258	0.02472	0.03017	0.02214										6.9	0.0472818	0.0165512	0.0297803	0.0320297	0.0237306	0.0290335	0.0207276										6.9	0.896096	0.748287	0.801303	0.825134	0.864732	1.01169
9	0.1286	-0.0042	0.0783	0.0947	0.1237	0.0837	0.1454		9	0.04532	0.01985	0.03409	0.03141	0.02804	0.0295	0.02512										9	0.0464518	0.0189512	0.0320003	0.0308597	0.0270506	0.0283635	0.0237076										9	0.880365	0.856793	0.861037	0.794993	0.985711	0.988343
11.1	0.1341	-0.0027	0.0828	0.097	0.1244	0.0835	0.1468		11.1	0.05089	0.02134	0.0387	0.03374	0.02876	0.02923	0.0264										11.1	0.0520218	0.0204412	0.0366103	0.0331897	0.0277706	0.0280935	0.0249876										11.1	0.985929	0.924156	0.985079	0.855017	1.01195	0.978934
13.2	0.1314	-0.0036	0.0849	0.0965	0.129	0.0807	0.1476		13.2	0.04825	0.02043	0.04092	0.03327	0.03338	0.02635	0.02707										13.2	0.0493818	0.0195312	0.0388303	0.0327197	0.0323906	0.0252135	0.0256576										13.2	0.935895	0.883015	1.04481	0.842909	1.1803	0.878579
15.3	0.1312	-0.0029	0.0864	0.0991	0.1301	0.0826	0.1459		15.3	0.04812	0.02113	0.04254	0.03589	0.0345	0.02818	0.02525										15.3	0.0492518	0.0202312	0.0404503	0.0353397	0.0335106	0.0270435	0.0238376										15.3	0.933432	0.914662	1.0884	0.910405	1.22111	0.942346
17.4	0.1281	0.0014	0.087	0.0994	0.1278	0.082	0.1445		17.4	0.04509	0.02542	0.04325	0.03622	0.03222	0.0275	0.02373										17.4	0.0462218	0.0245212	0.0411603	0.0356697	0.0312306	0.0263635	0.0223176										17.4	0.876006	1.10861	1.10751	0.918906	1.13803	0.918651
19.5	0.127	-0.0015	0.084	0.1024	0.1257	0.0835	0.1427		19.5	0.04406	0.02251	0.04037	0.03925	0.03015	0.02893	0.02181										19.5	0.0451918	0.0216112	0.0382803	0.0386997	0.0291606	0.0277935	0.0203976										19.5	0.856485	0.977052	1.03001	0.996963	1.0626	0.968481
21.6	0.1321	-0.0014	0.0831	0.1013	0.1202	0.0864	0.1443		21.6	0.04923	0.02261	0.03958	0.03818	0.02467	0.03176	0.02328										21.6	0.0503618	0.0217112	0.0374903	0.0376297	0.0236806	0.0306235	0.0218676										21.6	0.954469	0.981573	1.00876	0.969398	0.86291	1.06709
23.7	0.1299	-0.0053	0.0772	0.0973	0.124	0.0848	0.1441		23.7	0.0471	0.0187	0.0338	0.03421	0.02849	0.03008	0.02296										23.7	0.0482318	0.0178012	0.0317103	0.0336597	0.0275006	0.0289435	0.0215476										23.7	0.9141	0.804801	0.853234	0.867125	1.00211	1.00855
25.8	0.1308	-0.0076	0.074	0.1021	0.1218	0.0842	0.1487		25.8	0.04807	0.01639	0.03072	0.03903	0.02631	0.02941	0.02744										25.8	0.0492018	0.0154912	0.0286303	0.0384797	0.0253206	0.0282735	0.0260276										25.8	0.932484	0.700364	0.77036	0.991296	0.922671	0.985206
27.9	0.1278	-0.0033	0.0714	0.103	0.1229	0.0854	0.1487		27.9	0.04514	0.02069	0.02823	0.03996	0.02743	0.03054	0.02732										27.9	0.0462718	0.0197912	0.0261403	0.0394097	0.0264406	0.0294035	0.0259076										27.9	0.876954	0.894769	0.703361	1.01525	0.963483	1.02458
30	0.13	-0.003	0.077	0.0998	0.1264	0.0898	0.1459		30	0.0474	0.02098	0.03395	0.03679	0.03096	0.03486	0.0244										30	0.0485318	0.0200812	0.0318603	0.0362397	0.0299706	0.0337235	0.0229876										30	0.919786	0.90788	0.85727	0.93359	1.09211	1.17511
32.1	0.1356	-0.0017	0.0827	0.1029	0.1252	0.0874	0.1413		32.1	0.05307	0.02227	0.03977	0.03992	0.02978	0.03239	0.01967										32.1	0.0542018	0.0213712	0.0376803	0.0393697	0.0287906	0.0312535	0.0182576										32.1	1.02725	0.966202	1.01387	1.01422	1.04912	1.08905
34.2	0.1334	-0.0036	0.0835	0.103	0.1272	0.0838	0.1406		34.2	0.05094	0.02037	0.04068	0.04004	0.0318	0.02871	0.01885										34.2	0.0520718	0.0194712	0.0385903	0.0394897	0.0308106	0.0275735	0.0174376										34.2	0.986877	0.880302	1.03835	1.01731	1.12272	0.960815
36.3	0.1327	-0.0044	0.0835	0.104	0.1237	0.0878	0.1395		36.3	0.05031	0.01956	0.0408	0.04107	0.02832	0.03264	0.01763										36.3	0.0514418	0.0186612	0.0387103	0.0405197	0.0273306	0.0315035	0.0162176										36.3	0.974937	0.843681	1.04158	1.04385	0.995914	1.09776
38.4	0.134	-0.0027	0.0858	0.107	0.1249	0.0876	0.1415		38.4	0.05168	0.02125	0.04321	0.0441	0.02954	0.03237	0.01951										38.4	0.0528118	0.0203512	0.0411203	0.0435497	0.0285506	0.0312335	0.0180976										38.4	1.0009	0.920087	1.10643	1.12191	1.04037	1.08835
40.5	0.1365	-0.0022	0.0861	0.1006	0.1221	0.09	0.1443		40.5	0.05425	0.02175	0.04363	0.03773	0.02677	0.03469	0.02218										40.5	0.0553818	0.0208512	0.0415403	0.0371797	0.0257806	0.0335535	0.0207676										40.5	1.04961	0.942692	1.11773	0.957806	0.939433	1.16919
42.6	0.138	0.0015	0.0828	0.0979	0.1258	0.088	0.1478		42.6	0.05582	0.02544	0.04045	0.03506	0.03049	0.03262	0.02556										42.6	0.0569518	0.0245412	0.0383603	0.0345097	0.0295006	0.0314835	0.0241476										42.6	1.07936	1.10952	1.03217	0.889023	1.07499	1.09706
44.7	0.1374	-0.0016	0.0814	0.0941	0.1242	0.0854	0.1483		44.7	0.05529	0.02234	0.03916	0.03128	0.02891	0.02994	0.02594										44.7	0.0564218	0.0214412	0.0370703	0.0307297	0.0279206	0.0288035	0.0245276										44.7	1.06932	0.969367	0.997456	0.791644	1.01741	1.00367
46.8	0.1358	0.0026	0.0801	0.1009	0.1263	0.0847	0.1461		46.8	0.05375	0.02653	0.03798	0.03811	0.03103	0.02917	0.02362										46.8	0.0548818	0.0256312	0.0358903	0.0375597	0.0300406	0.0280335	0.0222076										46.8	1.04013	1.1588	0.965706	0.967595	1.09467	0.976844
48.9	0.1333	0.0057	0.083	0.0978	0.1264	0.0865	0.1481		48.9	0.05132	0.02962	0.04099	0.03504	0.03115	0.0309	0.02549										48.9	0.0524518	0.0287212	0.0389003	0.0344897	0.0301606	0.0297635	0.0240776										48.9	0.994079	1.2985	1.0467	0.888507	1.09904	1.03713
51	0.1333	0.0044	0.0815	0.1014	0.1252	0.0857	0.1444		51	0.05139	0.02832	0.03961	0.03867	0.02998	0.03002	0.02167										51	0.0525218	0.0274212	0.0375203	0.0381197	0.0289906	0.0288835	0.0202576										51	0.995406	1.23972	1.00956	0.982022	1.0564	1.00646
53.1	0.1335	0.0016	0.0859	0.1002	0.1241	0.0867	0.1436		53.1	0.05166	0.02551	0.04413	0.03749	0.0289	0.03095	0.02075										53.1	0.0527918	0.0246112	0.0420403	0.0369397	0.0279106	0.0298135	0.0193376										53.1	1.00052	1.11268	1.13118	0.951623	1.01705	1.03887
55.2	0.1314	0.0003	0.0841	0.1018	0.1285	0.0867	0.1426		55.2	0.04963	0.0242	0.04244	0.03912	0.03332	0.03087	0.01963										55.2	0.0507618	0.0233012	0.0403503	0.0385697	0.0323306	0.0297335	0.0182176										55.2	0.96205	1.05346	1.08571	0.993614	1.17811	1.03608
57.3	0.1305	-0.0015	0.0834	0.1024	0.1223	0.0854	0.1448		57.3	0.0488	0.0224	0.04186	0.03975	0.02714	0.0295	0.02171										57.3	0.0499318	0.0215012	0.0397703	0.0391997	0.0261506	0.0283635	0.0202976										57.3	0.946319	0.972079	1.07011	1.00984	0.952916	0.988343
59.4	0.1329	-0.0007	0.0858	0.1008	0.1218	0.0864	0.1456		59.4	0.05127	0.02319	0.04437	0.03818	0.02666	0.03043	0.02238										59.4	0.0524018	0.0222912	0.0422803	0.0376297	0.0256706	0.0292935	0.0209676										59.4	0.993131	1.0078	1.13764	0.969398	0.935425	1.02075
61.5	0.1316	-0.0022	0.0844	0.1051	0.1197	0.0878	0.1488		61.5	0.05004	0.02168	0.04309	0.04251	0.02459	0.03175	0.02546										61.5	0.0511718	0.0207812	0.0410003	0.0419597	0.0236006	0.0306135	0.0240476										61.5	0.96982	0.939528	1.1032	1.08095	0.859995	1.06675
63.6	0.1342	-0.0066	0.0863	0.1066	0.1224	0.0848	0.1511		63.6	0.0527	0.01728	0.04511	0.04403	0.02731	0.02868	0.02764										63.6	0.0538318	0.0163812	0.0430203	0.0434797	0.0263206	0.0275435	0.0262276										63.6	1.02023	0.740602	1.15755	1.1201	0.95911	0.959769
65.7	0.1359	-0.0048	0.0831	0.1042	0.1221	0.0879	0.1529		65.7	0.05447	0.01907	0.04202	0.04166	0.02703	0.0317	0.02932										65.7	0.0556018	0.0181712	0.0399303	0.0411097	0.0260406	0.0305635	0.0279076										65.7	1.05378	0.821528	1.07441	1.05905	0.948907	1.065
67.8	0.1355	0.0016	0.0784	0.1073	0.1212	0.0845	0.1515		67.8	0.05414	0.02546	0.03744	0.04479	0.02615	0.02823	0.02779										67.8	0.0552718	0.0245612	0.0353503	0.0442397	0.0251606	0.0270935	0.0263776										67.8	1.04752	1.11042	0.951176	1.13968	0.916841	0.944089
69.9	0.1314	0.0027	0.0804	0.1055	0.1205	0.0876	0.1454		69.9	0.05011	0.02656	0.03956	0.04302	0.02547	0.03126	0.02157										69.9	0.0512418	0.0256612	0.0374703	0.0424697	0.0244806	0.0301235	0.0201576										69.9	0.971147	1.16015	1.00822	1.09408	0.892062	1.04967
72	0.1323	0.0065	0.0765	0.1041	0.1219	0.0855	0.143		72	0.05108	0.03035	0.03577	0.04164	0.0269	0.02908	0.01905										72	0.0522118	0.0294512	0.0336803	0.0410897	0.0259106	0.0279435	0.0176376										72	0.98953	1.3315	0.906241	1.05853	0.94417	0.973707
74.1	0.137	0.0048	0.0751	0.1063	0.1242	0.0861	0.1455		74.1	0.05585	0.02864	0.03449	0.04387	0.02922	0.02961	0.02143										74.1	0.0569818	0.0277412	0.0324003	0.0433197	0.0282306	0.0284735	0.0200176										74.1	1.07993	1.25419	0.8718	1.11598	1.02871	0.992176
76.2	0.1308	0.0059	0.0754	0.1069	0.1241	0.0852	0.1457		76.2	0.04972	0.02974	0.0349	0.0445	0.02914	0.02863	0.02151										76.2	0.0508518	0.0288412	0.0328103	0.0439497	0.0281506	0.0274935	0.0200976										76.2	0.963755	1.30392	0.882832	1.13221	1.02579	0.958027
78.3	0.1304	0.001	0.0733	0.1056	0.1276	0.084	0.1469		78.3	0.04939	0.02483	0.03292	0.04323	0.03266	0.02736	0.02258										78.3	0.0505218	0.0239312	0.0308303	0.0426797	0.0316706	0.0262235	0.0211676										78.3	0.957501	1.08194	0.829556	1.09949	1.15406	0.913773
80.4	0.1334	0.001	0.0792	0.103	0.1261	0.0834	0.1504		80.4	0.05245	0.02482	0.03894	0.04066	0.03118	0.02669	0.02596										80.4	0.0535818	0.0239212	0.0368503	0.0401097	0.0301906	0.0255535	0.0245476										80.4	1.01549	1.08149	0.991536	1.03329	1.10013	0.890427
82.5	0.1351	-0.0064	0.0812	0.0991	0.1199	0.0817	0.148		82.5	0.05422	0.01742	0.04105	0.03678	0.02501	0.02491	0.02344										82.5	0.0553518	0.0165212	0.0389603	0.0362297	0.0240206	0.0237735	0.0220276										82.5	1.04904	0.746931	1.04831	0.933332	0.8753	0.828402
84.6	0.1359	-0.0034	0.0808	0.0956	0.1226	0.0834	0.1514		84.6	0.05509	0.02041	0.04077	0.03331	0.02773	0.02654	0.02672										84.6	0.0562218	0.0195112	0.0386803	0.0327597	0.0267406	0.0254035	0.0253076										84.6	1.06553	0.88211	1.04078	0.84394	0.974415	0.8852
86.7	0.1343	-0.005	0.0813	0.0999	0.1206	0.0817	0.1478		86.7	0.05356	0.0188	0.04138	0.03764	0.02575	0.02476	0.02299										86.7	0.0546918	0.0179012	0.0392903	0.0370897	0.0247606	0.0236235	0.0215776										86.7	1.03653	0.809322	1.05719	0.955487	0.902265	0.823175
88.8	0.1356	-0.0014	0.0824	0.1	0.1233	0.0805	0.1471		88.8	0.05493	0.0224	0.0426	0.03777	0.02847	0.02349	0.02217										88.8	0.0560618	0.0215012	0.0405103	0.0372197	0.0274806	0.0223535	0.0207576										88.8	1.0625	0.972079	1.09002	0.958836	1.00138	0.778921
90.9	0.1344	-0.0003	0.0784	0.0991	0.1227	0.082	0.1498		90.9	0.0538	0.02349	0.03872	0.03689	0.02789	0.02492	0.02475										90.9	0.0549318	0.0225912	0.0366303	0.0363397	0.0269006	0.0237835	0.0233376										90.9	1.04108	1.02136	0.985617	0.936166	0.980245	0.82875
93	0.1337	-0.0017	0.0792	0.0973	0.1266	0.0823	0.1456		93	0.05317	0.02208	0.03963	0.03512	0.03182	0.02514	0.02043										93	0.0543018	0.0211812	0.0375403	0.0345697	0.0308306	0.0240035	0.0190176										93	1.02914	0.957612	1.0101	0.890568	1.12345	0.836416
95.1	0.1359	-0.0007	0.0734	0.0985	0.127	0.082	0.1469		95.1	0.05544	0.02308	0.03395	0.03635	0.03224	0.02477	0.0216										95.1	0.0565718	0.0221812	0.0318603	0.0357997	0.0312506	0.0236335	0.0201876										95.1	1.07216	1.00282	0.85727	0.922255	1.13876	0.823523
97.2	0.1357	0.0003	0.0761	0.1021	0.1288	0.084	0.1491		97.2	0.0553	0.02407	0.03677	0.03998	0.03406	0.02669	0.02368										97.2	0.0564318	0.0231712	0.0346803	0.0394297	0.0330706	0.0255535	0.0222676										97.2	1.06951	1.04758	0.933148	1.01577	1.20508	0.890427
99.3	0.1333	0.0003	0.0767	0.1045	0.1273	0.0823	0.1462		99.3	0.05297	0.02406	0.03748	0.04241	0.03258	0.02492	0.02066										99.3	0.0541018	0.0231612	0.0353903	0.0418597	0.0315906	0.0237835	0.0192476										99.3	1.02535	1.04713	0.952252	1.07837	1.15115	0.82875
101.4	0.138	0.0021	0.08	0.105	0.1258	0.0866	0.15		101.4	0.05774	0.02586	0.0409	0.04293	0.0311	0.02915	0.02434										101.4	0.0588718	0.0249612	0.0388103	0.0423797	0.0301106	0.0280135	0.0229276										101.4	1.11575	1.12851	1.04427	1.09177	1.09722	0.976147
103.5	0.1331	-0.0006	0.0802	0.1042	0.1219	0.0859	0.1507		103.5	0.05291	0.02315	0.04121	0.04216	0.02723	0.02837	0.02492										103.5	0.0540418	0.0222512	0.0391203	0.0416097	0.0262406	0.0272335	0.0235076										103.5	1.02421	1.00599	1.05262	1.07193	0.956195	0.948967
105.6	0.1351	0.0007	0.0771	0.1024	0.1215	0.084	0.1501		105.6	0.05498	0.02444	0.03823	0.04039	0.02685	0.0264	0.02419										105.6	0.0561118	0.0235412	0.0361403	0.0398397	0.0258606	0.0252635	0.0227776										105.6	1.06344	1.06431	0.972432	1.02633	0.942348	0.880321
107.7	0.137	0.001	0.0765	0.1055	0.1227	0.0861	0.1527		107.7	0.05695	0.02474	0.03775	0.04352	0.02807	0.02843	0.02667										107.7	0.0580818	0.0238412	0.0356603	0.0429697	0.0270806	0.0272935	0.0252576										107.7	1.10078	1.07787	0.959517	1.10696	0.986804	0.951058
109.8	0.1378	0.0043	0.0765	0.1065	0.1268	0.084	0.1518		109.8	0.05782	0.02803	0.03786	0.04454	0.03219	0.02625	0.02565										109.8	0.0589518	0.0271312	0.0357703	0.0439897	0.0312006	0.0251135	0.0242376										109.8	1.11727	1.22661	0.962477	1.13324	1.13694	0.875095
111.9	0.1384	0.005	0.0724	0.1062	0.124	0.0844	0.1534		111.9	0.05849	0.02872	0.03388	0.04427	0.02941	0.02658	0.02713										111.9	0.0596218	0.0278212	0.0317903	0.0437197	0.0284206	0.0254435	0.0257176										111.9	1.12997	1.25781	0.855386	1.12629	1.03563	0.886594
114	0.1394	0.0024	0.0705	0.1061	0.1277	0.0814	0.1523		114	0.05955	0.02612	0.03209	0.0442	0.03314	0.0235	0.0259										114	0.0606818	0.0252212	0.0300003	0.0436497	0.0321506	0.0223635	0.0244876										114	1.15006	1.14026	0.807223	1.12448	1.17155	0.779269
116.1	0.138	-0.0001	0.0697	0.1069	0.1249	0.0816	0.1506		116.1	0.05822	0.02361	0.03141	0.04503	0.03036	0.02363	0.02408										116.1	0.0593518	0.0227112	0.0293203	0.0444797	0.0293706	0.0224935	0.0226676										116.1	1.12485	1.02678	0.788926	1.14586	1.07025	0.783799
118.2	0.1393	0.0034	0.0731	0.11	0.123	0.0838	0.15		118.2	0.05959	0.0271	0.03493	0.04816	0.02848	0.02576	0.02336										118.2	0.0607218	0.0262012	0.0328403	0.0476097	0.0274906	0.0246235	0.0219476										118.2	1.15081	1.18457	0.883639	1.2265	1.00174	0.85802
120.3	0.138	0.0005	0.0774	0.104	0.1191	0.0797	0.1522		120.3	0.05836	0.0242	0.03934	0.04218	0.0246	0.02158	0.02544										120.3	0.0594918	0.0233012	0.0372503	0.0416297	0.0236106	0.0204435	0.0240276										120.3	1.1275	1.05346	1.0023	1.07244	0.86036	0.712366
122.4	0.1406	-0.0023	0.0802	0.1037	0.1192	0.0834	0.1492		122.4	0.06103	0.02139	0.04226	0.04191	0.02472	0.02521	0.02231										122.4	0.0621618	0.0204912	0.0401703	0.0413597	0.0237306	0.0240735	0.0208976										122.4	1.17811	0.926417	1.08087	1.06549	0.864732	0.838855
124.5	0.1434	-0.0006	0.0758	0.103	0.1193	0.0802	0.1509		124.5	0.0639	0.02309	0.03797	0.04124	0.02485	0.02193	0.02389										124.5	0.0650318	0.0221912	0.0358803	0.0406897	0.0238606	0.0207935	0.0224776										124.5	1.2325	1.00327	0.965437	1.04823	0.869469	0.724562
126.6	0.1437	0.0019	0.0742	0.0993	0.1178	0.0798	0.1549		126.6	0.06427	0.02558	0.03649	0.03757	0.02337	0.02146	0.02777										126.6	0.0654018	0.0246812	0.0344003	0.0370197	0.0223806	0.0203235	0.0263576										126.6	1.23951	1.11585	0.925614	0.953684	0.815539	0.708184
128.7	0.1418	0.006	0.0749	0.0978	0.123	0.0798	0.1531		128.7	0.06243	0.02967	0.03731	0.03609	0.02859	0.02139	0.02585										128.7	0.0635618	0.0287712	0.0352203	0.0355397	0.0276006	0.0202535	0.0244376										128.7	1.20464	1.30076	0.947678	0.915557	1.00575	0.705745
130.8	0.1443	0.0069	0.0791	0.0985	0.1261	0.0823	0.1535		130.8	0.065	0.03057	0.04162	0.03682	0.03171	0.02381	0.02613										130.8	0.0661318	0.0296712	0.0395303	0.0362697	0.0307206	0.0226735	0.0247176										130.8	1.25335	1.34145	1.06365	0.934363	1.11944	0.790071
132.9	0.1408	0.0074	0.0772	0.1008	0.1236	0.0852	0.1515		132.9	0.06157	0.03106	0.03984	0.03915	0.02923	0.02664	0.024										132.9	0.0627018	0.0301612	0.0377503	0.0385997	0.0282406	0.0255035	0.0225876										132.9	1.18834	1.3636	1.01575	0.994387	1.02907	0.888684
135	0.1395	0.0071	0.0755	0.1004	0.1215	0.0819	0.1478		135	0.06034	0.03075	0.03826	0.03878	0.02716	0.02326	0.02018										135	0.0614718	0.0298512	0.0361703	0.0382297	0.0261706	0.0221235	0.0187676										135	1.16503	1.34959	0.97324	0.984855	0.953645	0.770906
137.1	0.139	0.0014	0.0774	0.1024	0.1185	0.0805	0.1506		137.1	0.05991	0.02505	0.04027	0.04081	0.02418	0.02179	0.02286										137.1	0.0610418	0.0241512	0.0381803	0.0402597	0.0231906	0.0206535	0.0214476										137.1	1.15688	1.09189	1.02732	1.03715	0.845055	0.719683
139.2	0.1374	0.0012	0.0791	0.1024	0.1159	0.0813	0.1527		139.2	0.05838	0.02484	0.04209	0.04083	0.0216	0.02252	0.02484										139.2	0.0595118	0.0239412	0.0400003	0.0402797	0.0206106	0.0213835	0.0234276										139.2	1.12788	1.08239	1.07629	1.03767	0.751041	0.745121
141.3	0.1372	-0.0019	0.0761	0.099	0.1148	0.0848	0.1493		141.3	0.05825	0.02173	0.0392	0.03746	0.02052	0.02594	0.02131										141.3	0.0593818	0.0208312	0.0371103	0.0369097	0.0195306	0.0248035	0.0198976										141.3	1.12542	0.941788	0.998532	0.95085	0.711687	0.864292
143.4	0.1383	-0.0012	0.078	0.0988	0.1188	0.0824	0.153		143.4	0.05942	0.02243	0.04122	0.03729	0.02454	0.02347	0.02489										143.4	0.0605518	0.0215312	0.0391303	0.0367397	0.0235506	0.0223335	0.0234776										143.4	1.14759	0.973435	1.05288	0.946471	0.858173	0.778224
145.5	0.1372	-0.0007	0.0728	0.098	0.1213	0.0811	0.1562		145.5	0.05838	0.02292	0.03614	0.03652	0.02707	0.02209	0.02797										145.5	0.0595118	0.0220212	0.0340503	0.0359697	0.0260806	0.0209535	0.0265576										145.5	1.12788	0.995589	0.916197	0.926634	0.950365	0.730137
147.6	0.1357	0.0034	0.0726	0.102	0.1207	0.0822	0.1568		147.6	0.05695	0.02701	0.03605	0.04054	0.02649	0.02312	0.02845										147.6	0.0580818	0.0261112	0.0339603	0.0399897	0.0255006	0.0219835	0.0270376										147.6	1.10078	1.1805	0.913775	1.0302	0.92923	0.766028
149.7	0.1366	0.0045	0.0723	0.1042	0.1233	0.0878	0.157		149.7	0.05792	0.02811	0.03587	0.04277	0.02911	0.02865	0.02853										149.7	0.0590518	0.0272112	0.0337803	0.0422197	0.0281206	0.0275135	0.0271176										149.7	1.11916	1.23023	0.908932	1.08764	1.0247	0.958724
151.8	0.1376	0.0015	0.0715	0.1038	0.1165	0.0874	0.152		151.8	0.05899	0.0251	0.03518	0.0424	0.02233	0.02817	0.0234										151.8	0.0601218	0.0242012	0.0330903	0.0418497	0.0213406	0.0270335	0.0219876										151.8	1.13944	1.09415	0.890366	1.07811	0.777642	0.941998
153.9	0.1374	0.0051	0.068	0.103	0.117	0.0859	0.1505		153.9	0.05886	0.02869	0.0318	0.04163	0.02285	0.0266	0.02178										153.9	0.0599918	0.0277912	0.0297103	0.0410797	0.0218606	0.0254635	0.0203676										153.9	1.13698	1.25645	0.79942	1.05828	0.79659	0.887291
156	0.1359	0.0014	0.0685	0.1055	0.117	0.0838	0.1511		156	0.05743	0.02499	0.03242	0.04415	0.02288	0.02442	0.02226										156	0.0585618	0.0240912	0.0303303	0.0435997	0.0218906	0.0232835	0.0208476										156	1.10988	1.08917	0.816102	1.12319	0.797684	0.811327
158.1	0.1357	-0.0028	0.0712	0.1076	0.1162	0.0826	0.1521		158.1	0.0573	0.02078	0.03523	0.04628	0.0221	0.02315	0.02314										158.1	0.0584318	0.0198812	0.0331403	0.0457297	0.0211106	0.0220135	0.0217276										158.1	1.10741	0.898838	0.891711	1.17807	0.769261	0.767073
160.2	0.135	-0.0037	0.0728	0.1069	0.1134	0.0828	0.1515		160.2	0.05667	0.01987	0.03695	0.04561	0.01932	0.02328	0.02241										160.2	0.0578018	0.0189712	0.0348603	0.0450597	0.0183306	0.0221435	0.0209976										160.2	1.09547	0.857697	0.937991	1.16081	0.667959	0.771603
162.3	0.1355	-0.0066	0.0749	0.1008	0.1148	0.0843	0.154		162.3	0.05723	0.01697	0.03916	0.03954	0.02074	0.0247	0.02479										162.3	0.0583618	0.0160712	0.0370703	0.0389897	0.0197506	0.0235635	0.0233776										162.3	1.10609	0.726586	0.997456	1.00443	0.719703	0.821084
164.4	0.1379	-0.0034	0.0736	0.0977	0.1209	0.0829	0.1531		164.4	0.0597	0.02016	0.03798	0.03647	0.02686	0.02323	0.02377										164.4	0.0608318	0.0192612	0.0358903	0.0359197	0.0258706	0.0220935	0.0223576										164.4	1.1529	0.870808	0.965706	0.925346	0.942713	0.769861
166.5	0.134	-0.0006	0.0736	0.0998	0.1185	0.079	0.1534		166.5	0.05587	0.02295	0.0381	0.03859	0.02449	0.01925	0.02395										166.5	0.0570018	0.0220512	0.0360103	0.0380397	0.0235006	0.0181135	0.0225376										166.5	1.08031	0.996945	0.968935	0.979961	0.856351	0.631176
168.6	0.134	0.0034	0.0741	0.1038	0.1178	0.0763	0.1554		168.6	0.05594	0.02695	0.03871	0.04262	0.02381	0.01648	0.02582										168.6	0.0570718	0.0260512	0.0366203	0.0420697	0.0228206	0.0153435	0.0244076										168.6	1.08164	1.17779	0.985348	1.08378	0.831572	0.534654
170.7	0.1328	0.0043	0.0701	0.107	0.1181	0.0777	0.1519		170.7	0.05481	0.02784	0.03483	0.04585	0.02413	0.01781	0.0222										170.7	0.0559418	0.0269412	0.0327403	0.0452997	0.0231406	0.0166735	0.0207876										170.7	1.06022	1.21802	0.880948	1.16699	0.843233	0.580998
172.8	0.1387	0.0015	0.069	0.1021	0.1192	0.0755	0.1521		172.8	0.06078	0.02503	0.03385	0.04098	0.02525	0.01553	0.02228										172.8	0.0619118	0.0241312	0.0317603	0.0404297	0.0242606	0.0143935	0.0208676										172.8	1.17337	1.09098	0.854579	1.04153	0.884045	0.50155
174.9	0.1359	-0.0024	0.0724	0.0999	0.1145	0.0766	0.1493		174.9	0.05805	0.02113	0.03736	0.0388	0.02057	0.01656	0.01936										174.9	0.0591818	0.0202312	0.0352703	0.0382497	0.0195806	0.0154235	0.0179476										174.9	1.12163	0.914662	0.949023	0.985371	0.713508	0.537441
177	0.1356	-0.0027	0.0715	0.0987	0.1134	0.0793	0.1538		177	0.05782	0.02082	0.03658	0.03763	0.01949	0.01919	0.02374										177	0.0589518	0.0199212	0.0344903	0.0370797	0.0185006	0.0180535	0.0223276										177	1.11727	0.900647	0.928036	0.95523	0.674154	0.629085
179.1	0.1338	-0.0022	0.0721	0.1006	0.1136	0.0813	0.1566		179.1	0.05608	0.02131	0.03729	0.03956	0.01972	0.02111	0.02641										179.1	0.0572118	0.0204112	0.0352003	0.0390097	0.0187306	0.0199735	0.0249976										179.1	1.08429	0.9228	0.94714	1.00495	0.682535	0.695988
181.2	0.1349	-0.0023	0.0767	0.1016	0.1148	0.0813	0.157		181.2	0.05725	0.02121	0.04201	0.04059	0.02094	0.02104	0.02669										181.2	0.0583818	0.0203112	0.0399203	0.0400397	0.0199506	0.0199035	0.0252776										181.2	1.10647	0.918279	1.07414	1.03148	0.726991	0.693549
183.3	0.1365	0.0007	0.0749	0.1009	0.1155	0.082	0.1558		183.3	0.05892	0.0242	0.04033	0.03992	0.02166	0.02166	0.02537										183.3	0.0600518	0.0233012	0.0382403	0.0393697	0.0206706	0.0205235	0.0239576										183.3	1.13812	1.05346	1.02894	1.01422	0.753228	0.715154
185.4	0.1336	0.0049	0.0719	0.1015	0.1178	0.08	0.1575		185.4	0.05609	0.02839	0.03744	0.04054	0.02398	0.01959	0.02695										185.4	0.0572218	0.0274912	0.0353503	0.0399897	0.0229906	0.0184535	0.0255376										185.4	1.08448	1.24289	0.951176	1.0302	0.837767	0.643023
187.5	0.1342	0.0041	0.0701	0.1055	0.1143	0.0787	0.1564		187.5	0.05676	0.02759	0.03576	0.04457	0.0205	0.01822	0.02572										187.5	0.0578918	0.0266912	0.0336703	0.0440197	0.0195106	0.0170835	0.0243076										187.5	1.09718	1.20672	0.905972	1.13401	0.710958	0.595285
189.6	0.134	0.0066	0.0717	0.1086	0.1122	0.0823	0.1563		189.6	0.05663	0.03008	0.03747	0.0477	0.01843	0.02174	0.0255										189.6	0.0577618	0.0291812	0.0353803	0.0471497	0.0174406	0.0206035	0.0240876										189.6	1.09472	1.3193	0.951983	1.21465	0.635528	0.717941
191.7	0.1343	0.0057	0.0669	0.1087	0.113	0.0829	0.1559		191.7	0.057	0.02917	0.03279	0.04783	0.01925	0.02227	0.02498										191.7	0.0581318	0.0282712	0.0307003	0.0472797	0.0182606	0.0211335	0.0235676										191.7	1.10173	1.27815	0.826058	1.218	0.665408	0.736409
193.8	0.1355	0.0041	0.0609	0.1059	0.1172	0.0813	0.1536		193.8	0.05827	0.02757	0.02691	0.04505	0.02347	0.02059	0.02256										193.8	0.0594018	0.0266712	0.0248203	0.0444997	0.0224806	0.0194535	0.0211476										193.8	1.1258	1.20582	0.667844	1.14638	0.819183	0.677869
195.9	0.1347	0.0028	0.0594	0.1045	0.1145	0.0773	0.1571		195.9	0.05753	0.02626	0.02552	0.04368	0.02079	0.01652	0.02594										195.9	0.0586618	0.0253612	0.0234303	0.0431297	0.0198006	0.0153835	0.0245276										195.9	1.11177	1.14659	0.630443	1.11109	0.721525	0.536047
198	0.1313	0.003	0.0619	0.1027	0.1163	0.0822	0.1602		198	0.0542	0.02646	0.02814	0.04191	0.02261	0.02135	0.02891										198	0.0553318	0.0255612	0.0260503	0.0413597	0.0216206	0.0202135	0.0274976										198	1.04866	1.15563	0.70094	1.06549	0.787845	0.704351
200.1	0.1331	0.0076	0.0631	0.1045	0.1136	0.0833	0.1561		200.1	0.05607	0.03105	0.02946	0.04374	0.01994	0.02237	0.02469										200.1	0.0572018	0.0301512	0.0273703	0.0431897	0.0189506	0.0212335	0.0232776										200.1	1.0841	1.36315	0.736457	1.11263	0.690552	0.739894
202.2	0.1366	0.0033	0.0651	0.1066	0.1171	0.0819	0.1549		202.2	0.05964	0.02674	0.03157	0.04587	0.02346	0.0209	0.02337										202.2	0.0607718	0.0258412	0.0294803	0.0453197	0.0224706	0.0197635	0.0219576										202.2	1.15176	1.16829	0.793231	1.1675	0.818819	0.688671
204.3	0.1362	0.0073	0.0697	0.1021	0.1145	0.0836	0.1544		204.3	0.05931	0.03074	0.03629	0.04139	0.02088	0.02252	0.02275										204.3	0.0604418	0.0298412	0.0342003	0.0408397	0.0198906	0.0213835	0.0213376										204.3	1.14551	1.34913	0.920233	1.05209	0.724805	0.745121
206.4	0.1368	0.0028	0.0662	0.1033	0.1183	0.0801	0.1554		206.4	0.05998	0.02623	0.0329	0.04262	0.0247	0.01895	0.02362										206.4	0.0611118	0.0253312	0.0308103	0.0420697	0.0237106	0.0178135	0.0222076										206.4	1.15821	1.14524	0.829018	1.08378	0.864003	0.620722
208.5	0.1385	0.0009	0.0679	0.1034	0.1154	0.0773	0.1568		208.5	0.06175	0.02432	0.03472	0.04275	0.02182	0.01608	0.0249										208.5	0.0628818	0.0234212	0.0326303	0.0421997	0.0208306	0.0149435	0.0234876										208.5	1.19175	1.05888	0.877988	1.08713	0.759058	0.520715
210.6	0.1365	0.0028	0.0688	0.1026	0.1121	0.0804	0.1529		210.6	0.05982	0.02622	0.03574	0.04198	0.01855	0.0191	0.02088										210.6	0.0609518	0.0253212	0.0336503	0.0414297	0.0175606	0.0179635	0.0194676										210.6	1.15517	1.14478	0.905434	1.06729	0.639901	0.625949
212.7	0.1345	0.002	0.0658	0.1024	0.1138	0.0837	0.1578		212.7	0.05788	0.02541	0.03285	0.0418	0.02027	0.02233	0.02566										212.7	0.0590118	0.0245112	0.0307603	0.0412497	0.0192806	0.0211935	0.0242476										212.7	1.11841	1.10816	0.827672	1.06266	0.702577	0.7385
214.8	0.1326	0.0003	0.0648	0.1012	0.1147	0.082	0.1607		214.8	0.05605	0.0237	0.03197	0.04063	0.02119	0.02055	0.02843										214.8	0.0571818	0.0228012	0.0298803	0.0400797	0.0202006	0.0194135	0.0270176										214.8	1.08372	1.03085	0.803994	1.03251	0.736101	0.676475
216.9	0.133	0.0056	0.0665	0.0992	0.1145	0.0806	0.1571		216.9	0.05652	0.029	0.03378	0.03866	0.02101	0.01908	0.02471										216.9	0.0576518	0.0281012	0.0316903	0.0381097	0.0200206	0.0179435	0.0232976										216.9	1.09263	1.27047	0.852696	0.981764	0.729542	0.625252
219	0.1331	0.004	0.0672	0.1043	0.1133	0.0821	0.158		219	0.05669	0.02739	0.0346	0.04379	0.01983	0.02051	0.02549										219	0.0578218	0.0264912	0.0325103	0.0432397	0.0188406	0.0193735	0.0240776										219	1.09585	1.19768	0.87476	1.11392	0.686543	0.675081
221.1	0.1312	0.0041	0.0705	0.1014	0.1108	0.083	0.1531		221.1	0.05486	0.02748	0.03802	0.04092	0.01736	0.02133	0.02047										221.1	0.0559918	0.0265812	0.0359303	0.0403697	0.0163706	0.0201935	0.0190576										221.1	1.06117	1.20175	0.966782	1.03998	0.596538	0.703654
223.2	0.1352	0.0012	0.0684	0.1048	0.1118	0.0827	0.1555		223.2	0.05893	0.02458	0.03603	0.04434	0.01838	0.02096	0.02275										223.2	0.0600618	0.0236812	0.0339403	0.0437897	0.0173906	0.0198235	0.0213376										223.2	1.13831	1.07064	0.913237	1.12809	0.633706	0.690762
225.3	0.1348	0.004	0.0663	0.1031	0.1134	0.0797	0.1571		225.3	0.0586	0.02737	0.03405	0.04267	0.02	0.01788	0.02422										225.3	0.0597318	0.0264712	0.0319603	0.0421197	0.0190106	0.0167435	0.0228076										225.3	1.13205	1.19678	0.859961	1.08507	0.692738	0.583437
227.4	0.1333	0.0031	0.058	0.104	0.1143	0.0822	0.1581		227.4	0.05717	0.02646	0.02586	0.0436	0.02092	0.02031	0.0251										227.4	0.0583018	0.0255612	0.0237703	0.0430497	0.0199306	0.0191735	0.0236876										227.4	1.10495	1.15563	0.639591	1.10903	0.726262	0.668112
229.5	0.1316	0.005	0.0579	0.1034	0.1133	0.0824	0.1586		229.5	0.05553	0.02836	0.02588	0.04303	0.01994	0.02044	0.02548										229.5	0.0566618	0.0274612	0.0237903	0.0424797	0.0189506	0.0193035	0.0240676										229.5	1.07387	1.24153	0.64013	1.09434	0.690552	0.672642
231.6	0.1323	0.0016	0.0584	0.1028	0.1157	0.0801	0.1607		231.6	0.0563	0.02495	0.0265	0.04245	0.02237	0.01806	0.02746										231.6	0.0574318	0.0240512	0.0244103	0.0418997	0.0213806	0.0169235	0.0260476										231.6	1.08846	1.08737	0.656812	1.0794	0.7791	0.58971
233.7	0.1301	0.0037	0.0585	0.1033	0.1164	0.0829	0.1581		233.7	0.05417	0.02704	0.02671	0.04298	0.02309	0.02079	0.02473										233.7	0.0553018	0.0261412	0.0246203	0.0424297	0.0221006	0.0196535	0.0233176										233.7	1.04809	1.18186	0.662462	1.09305	0.805336	0.684838
235.8	0.1299	0.0029	0.0611	0.1029	0.1157	0.0792	0.1583		235.8	0.05404	0.02624	0.02943	0.04261	0.02241	0.01701	0.02481										235.8	0.0551718	0.0253412	0.0273403	0.0420597	0.0214206	0.0158735	0.0233976										235.8	1.04563	1.14569	0.73565	1.08352	0.780557	0.553122
237.9	0.1292	-0.0015	0.0636	0.1057	0.1108	0.0791	0.1581		237.9	0.05341	0.02183	0.03205	0.04544	0.01753	0.01684	0.02449										237.9	0.0545418	0.0209312	0.0299603	0.0448897	0.0165406	0.0157035	0.0230776										237.9	1.03369	0.946309	0.806146	1.15643	0.602732	0.547198
240	0.1324	-0.0014	0.0683	0.1058	0.1079	0.0834	0.1538		240	0.05668	0.02192	0.03686	0.04557	0.01465	0.02107	0.02007										240	0.0578118	0.0210212	0.0347703	0.0450197	0.0136606	0.0199335	0.0186576										240	1.09566	0.950378	0.93557	1.15978	0.497787	0.694595
242.1	0.1372	-0.0024	0.0649	0.1084	0.1111	0.0794	0.1552		242.1	0.06155	0.02092	0.03358	0.04819	0.01788	0.01699	0.02134										242.1	0.0626818	0.0200212	0.0314903	0.0476397	0.0168906	0.0158535	0.0199276										242.1	1.18796	0.905168	0.847314	1.22727	0.615486	0.552425
244.2	0.1349	-0.0029	0.064	0.1022	0.1095	0.0827	0.157		244.2	0.05932	0.02041	0.03279	0.04202	0.0163	0.02022	0.02302										244.2	0.0604518	0.0195112	0.0307003	0.0414697	0.0153106	0.0190835	0.0216076										244.2	1.1457	0.88211	0.826058	1.06832	0.557912	0.664976
246.3	0.1383	-0.0026	0.0627	0.1022	0.1131	0.0801	0.157		246.3	0.06278	0.0207	0.03161	0.04205	0.01992	0.01755	0.0229										246.3	0.0639118	0.0198012	0.0295203	0.0414997	0.0189306	0.0164135	0.0214876										246.3	1.21127	0.895221	0.794307	1.0691	0.689823	0.571938
248.4	0.1354	0.0017	0.0573	0.1048	0.114	0.0779	0.1598		248.4	0.05995	0.025	0.02633	0.04468	0.02084	0.01527	0.02558										248.4	0.0610818	0.0241012	0.0242403	0.0441297	0.0198506	0.0141335	0.0241676										248.4	1.15764	1.08963	0.652238	1.13685	0.723347	0.492491
250.5	0.1336	0.0036	0.0601	0.1049	0.1122	0.0834	0.1608		250.5	0.05822	0.02689	0.02924	0.0448	0.01906	0.0207	0.02646										250.5	0.0593518	0.0259912	0.0271503	0.0442497	0.0180706	0.0195635	0.0250476										250.5	1.12485	1.17507	0.730537	1.13994	0.658485	0.681702
252.6	0.1344	0.0024	0.0583	0.1011	0.1113	0.0812	0.1591		252.6	0.05909	0.02568	0.02756	0.04103	0.01819	0.01842	0.02463										252.6	0.0602218	0.0247812	0.0254703	0.0404797	0.0172006	0.0172835	0.0232176										252.6	1.14134	1.12037	0.685334	1.04282	0.626783	0.602254
254.7	0.1326	0.003	0.0605	0.0999	0.1122	0.0786	0.1602		254.7	0.05736	0.02628	0.02987	0.03986	0.01911	0.01575	0.02561										254.7	0.0584918	0.0253812	0.0277803	0.0393097	0.0181206	0.0146135	0.0241976										254.7	1.10855	1.1475	0.747489	1.01268	0.660307	0.509216
256.8	0.1335	0.0057	0.0623	0.1018	0.1122	0.0806	0.1566		256.8	0.05833	0.02897	0.03179	0.04179	0.01913	0.01768	0.02189										256.8	0.0594618	0.0280712	0.0297003	0.0412397	0.0181406	0.0165435	0.0204776										256.8	1.12693	1.26911	0.799151	1.0624	0.661036	0.576468
258.9	0.1313	0.0044	0.0605	0.1056	0.1068	0.0804	0.1569		258.9	0.0562	0.02766	0.03011	0.04562	0.01375	0.0174	0.02207										258.9	0.0573318	0.0267612	0.0280203	0.0450697	0.0127606	0.0162635	0.0206576										258.9	1.08657	1.20989	0.753947	1.16106	0.464991	0.566712
261	0.1304	0.0005	0.0636	0.1024	0.1108	0.0814	0.1609		261	0.05537	0.02376	0.03332	0.04244	0.01777	0.01833	0.02594										261	0.0565018	0.0228612	0.0312303	0.0418897	0.0167806	0.0171935	0.0245276										261	1.07084	1.03357	0.840319	1.07914	0.611478	0.599118
263.1	0.1328	-0.0022	0.0637	0.0976	0.1136	0.0835	0.1595		263.1	0.05783	0.02105	0.03354	0.03767	0.0206	0.02035	0.02442										263.1	0.0589618	0.0201512	0.0314503	0.0371197	0.0196106	0.0192135	0.0230076										263.1	1.11746	0.911045	0.846238	0.95626	0.714602	0.669506
265.2	0.1314	-0.0034	0.0676	0.1023	0.117	0.0798	0.1609		265.2	0.0565	0.01984	0.03756	0.0424	0.02402	0.01658	0.0257										265.2	0.0576318	0.0189412	0.0354703	0.0418497	0.0230306	0.0154435	0.0242876										265.2	1.09225	0.85634	0.954405	1.07811	0.839225	0.538138
267.3	0.1315	-0.0026	0.0614	0.097	0.118	0.0781	0.1604		267.3	0.05667	0.02064	0.03147	0.03713	0.02504	0.01481	0.02508										267.3	0.0578018	0.0197412	0.0293803	0.0365797	0.0240506	0.0136735	0.0236676										267.3	1.09547	0.892509	0.79054	0.942349	0.876393	0.476462
269.4	0.1302	0.0009	0.0609	0.1004	0.1151	0.0833	0.16		269.4	0.05544	0.02413	0.03109	0.04055	0.02216	0.01993	0.02456										269.4	0.0565718	0.0232312	0.0290003	0.0399997	0.0211706	0.0187935	0.0231476										269.4	1.07216	1.05029	0.780316	1.03045	0.771447	0.654871
271.5	0.1294	0.0001	0.0647	0.1022	0.1127	0.0798	0.1635		271.5	0.05471	0.02332	0.035	0.04238	0.01978	0.01636	0.02793										271.5	0.0558418	0.0224212	0.0329103	0.0418297	0.0187906	0.0152235	0.0265176										271.5	1.05833	1.01367	0.885522	1.0776	0.684721	0.530472
273.6	0.1273	-0.0035	0.0659	0.1007	0.112	0.0835	0.1598		273.6	0.05268	0.01972	0.03632	0.04091	0.01911	0.01998	0.02411										273.6	0.0538118	0.0188212	0.0342303	0.0403597	0.0181206	0.0188435	0.0226976										273.6	1.01985	0.850915	0.92104	1.03973	0.660307	0.656613
275.7	0.1301	-0.0035	0.0641	0.1044	0.1105	0.0835	0.1548		275.7	0.05555	0.01971	0.03464	0.04464	0.01763	0.01991	0.01899										275.7	0.0566818	0.0188112	0.0325503	0.0440897	0.0166406	0.0187735	0.0175776										275.7	1.07425	0.850463	0.875836	1.13582	0.606376	0.654174
277.8	0.1281	-0.0042	0.0581	0.1004	0.109	0.0812	0.1564		277.8	0.05362	0.01901	0.02875	0.04067	0.01615	0.01754	0.02047										277.8	0.0547518	0.0181112	0.0266603	0.0401197	0.0151606	0.0164035	0.0190576										277.8	1.03767	0.818816	0.717353	1.03354	0.552446	0.57159
279.9	0.1327	-0.0047	0.0557	0.1013	0.1086	0.0799	0.1595		279.9	0.05828	0.0185	0.02647	0.04159	0.01577	0.01616	0.02344										279.9	0.0594118	0.0176012	0.0243803	0.0410397	0.0147806	0.0150235	0.0220276										279.9	1.12599	0.795758	0.656005	1.05725	0.538599	0.523503
282	0.1292	-0.0036	0.0588	0.1037	0.1138	0.0843	0.1593		282	0.05485	0.01959	0.02968	0.04402	0.02099	0.02049	0.02312										282	0.0559818	0.0186912	0.0275903	0.0434697	0.0200006	0.0193535	0.0217076										282	1.06098	0.845038	0.742377	1.11985	0.728813	0.674384
284.1	0.1295	-0.0037	0.0616	0.1018	0.1145	0.0836	0.1612		284.1	0.05522	0.01949	0.0326	0.04215	0.02172	0.01971	0.0249										284.1	0.0563518	0.0185912	0.0305103	0.0415997	0.0207306	0.0185735	0.0234876										284.1	1.06799	0.840517	0.820945	1.07167	0.755414	0.647205
286.2	0.1316	-0.0028	0.0584	0.1006	0.1177	0.0837	0.159		286.2	0.05739	0.02038	0.02952	0.04098	0.02494	0.01974	0.02258										286.2	0.0585218	0.0194812	0.0274303	0.0404297	0.0239506	0.0186035	0.0211676										286.2	1.10912	0.880754	0.738071	1.04153	0.872749	0.64825
288.3	0.1292	-0.0023	0.0583	0.1033	0.1181	0.0836	0.1576		288.3	0.05506	0.02087	0.02953	0.0437	0.02536	0.01957	0.02105										288.3	0.0561918	0.0199712	0.0274403	0.0431497	0.0243706	0.0184335	0.0196376										288.3	1.06496	0.902907	0.738341	1.1116	0.888054	0.642326
290.4	0.1302	-0.0029	0.0605	0.1002	0.1174	0.0845	0.16		290.4	0.05613	0.02027	0.03185	0.04063	0.02468	0.02039	0.02333										290.4	0.0572618	0.0193712	0.0297603	0.0400797	0.0236906	0.0192535	0.0219176										290.4	1.08524	0.875781	0.800765	1.03251	0.863275	0.6709
292.5	0.1311	-0.0007	0.0593	0.1012	0.1131	0.0858	0.1611		292.5	0.0571	0.02246	0.03076	0.04166	0.0204	0.02162	0.02431										292.5	0.0582318	0.0215612	0.0286703	0.0411097	0.0194106	0.0204835	0.0228976										292.5	1.10362	0.974792	0.771436	1.05905	0.707314	0.71376
294.6	0.1329	-0.001	0.0583	0.1013	0.1121	0.0837	0.1621		294.6	0.05897	0.02215	0.02988	0.04179	0.01943	0.01944	0.02519										294.6	0.0601018	0.0212512	0.0277903	0.0412397	0.0184406	0.0183035	0.0237776										294.6	1.13906	0.960777	0.747758	1.0624	0.671967	0.637796
296.7	0.1307	0.0002	0.0567	0.102	0.1135	0.0837	0.1643		296.7	0.05683	0.02335	0.0284	0.04252	0.02085	0.01937	0.02727										296.7	0.0579618	0.0224512	0.0263103	0.0419697	0.0198606	0.0182335	0.0258576										296.7	1.09851	1.01503	0.707936	1.0812	0.723712	0.635357
298.8	0.1298	0.0038	0.0578	0.1023	0.1154	0.0834	0.159		298.8	0.056	0.02694	0.02961	0.04284	0.02277	0.019	0.02184										298.8	0.0571318	0.0260412	0.0275203	0.0422897	0.0217806	0.0178635	0.0204276										298.8	1.08278	1.17733	0.740493	1.08945	0.793675	0.622464
300.9	0.1302	0.006	0.0606	0.1027	0.1178	0.0848	0.1602		300.9	0.05647	0.02913	0.03253	0.04327	0.02519	0.02032	0.02292										300.9	0.0576018	0.0282312	0.0304403	0.0427197	0.0242006	0.0191835	0.0215076										300.9	1.09168	1.27635	0.819062	1.10052	0.881859	0.66846
303	0.1319	0.0036	0.0616	0.1042	0.1193	0.085	0.1592		303	0.05824	0.02673	0.03365	0.0448	0.02671	0.02045	0.0218										303	0.0593718	0.0258312	0.0315603	0.0442497	0.0257206	0.0193135	0.0203876										303	1.12523	1.16784	0.849198	1.13994	0.937247	0.67299
305.1	0.1301	-0.0003	0.0647	0.1069	0.1162	0.0834	0.1575		305.1	0.05651	0.02282	0.03686	0.04753	0.02364	0.01877	0.01998										305.1	0.0576418	0.0219212	0.0347703	0.0469797	0.0226506	0.0176335	0.0185676										305.1	1.09244	0.991068	0.93557	1.21027	0.825378	0.61445
307.2	0.1288	-0.0003	0.0626	0.1077	0.114	0.0861	0.1626		307.2	0.05528	0.02281	0.03488	0.04835	0.02146	0.0214	0.02495										307.2	0.0564118	0.0219112	0.0327903	0.0477997	0.0204706	0.0202635	0.0235376										307.2	1.06913	0.990615	0.882294	1.23139	0.74594	0.706094
309.3	0.1294	0.001	0.0621	0.1063	0.1133	0.084	0.1618		309.3	0.05595	0.02411	0.03449	0.04698	0.02078	0.01923	0.02403										309.3	0.0570818	0.0232112	0.0324003	0.0464297	0.0197906	0.0180935	0.0226176										309.3	1.08183	1.04939	0.8718	1.1961	0.721161	0.630479
311.4	0.1281	-0.0008	0.0597	0.1086	0.1094	0.0855	0.1635		311.4	0.05472	0.0223	0.03221	0.04931	0.0169	0.02065	0.02561										311.4	0.0558518	0.0214012	0.0301203	0.0487597	0.0159106	0.0195135	0.0241976										311.4	1.05852	0.967558	0.810452	1.25612	0.579776	0.67996
313.5	0.1293	-0.0038	0.0567	0.1074	0.113	0.0861	0.1658		313.5	0.05598	0.01929	0.02933	0.04814	0.02052	0.02118	0.02779										313.5	0.0571118	0.0183912	0.0272403	0.0475897	0.0195306	0.0200435	0.0263776										313.5	1.0824	0.831475	0.732959	1.22598	0.711687	0.698428
315.6	0.1272	-0.0038	0.0576	0.1036	0.1116	0.0862	0.1668		315.6	0.05395	0.01929	0.03034	0.04436	0.01915	0.02121	0.02866										315.6	0.0550818	0.0183912	0.0282503	0.0438097	0.0181606	0.0200735	0.0272476										315.6	1.04392	0.831475	0.760135	1.1286	0.661764	0.699473
317.7	0.1279	0.0023	0.0555	0.1074	0.1116	0.0891	0.1651		317.7	0.05472	0.02538	0.02836	0.04819	0.01917	0.02403	0.02684										317.7	0.0558518	0.0244812	0.0262703	0.0476397	0.0181806	0.0228935	0.0254276										317.7	1.05852	1.10681	0.706859	1.22727	0.662493	0.797737
319.8	0.1241	0.0049	0.0565	0.1102	0.1131	0.0872	0.1643		319.8	0.05099	0.02797	0.02947	0.05102	0.02069	0.02206	0.02592										319.8	0.0521218	0.0270712	0.0273803	0.0504697	0.0197006	0.0209235	0.0245076										319.8	0.987825	1.2239	0.736726	1.30018	0.717881	0.729092
321.9	0.1284	0.0009	0.0569	0.1076	0.1126	0.0879	0.1604		321.9	0.05536	0.02397	0.02999	0.04845	0.02021	0.02268	0.0219										321.9	0.0564918	0.0230712	0.0279003	0.0478997	0.0192206	0.0215435	0.0204876										321.9	1.07065	1.04306	0.750718	1.23397	0.70039	0.750696
324	0.1313	-0.0015	0.0602	0.1091	0.112	0.0874	0.1605		324	0.05833	0.02156	0.03341	0.04998	0.01963	0.02211	0.02188										324	0.0594618	0.0206612	0.0313203	0.0494297	0.0186406	0.0209735	0.0204676										324	1.12693	0.934102	0.84274	1.27338	0.679255	0.730834
326.1	0.1308	-0.0008	0.057	0.1104	0.1087	0.087	0.162		326.1	0.0579	0.02225	0.03032	0.0513	0.01636	0.02164	0.02325										326.1	0.0590318	0.0213512	0.0282303	0.0507497	0.0153706	0.0205035	0.0218376										326.1	1.11878	0.965298	0.759597	1.30739	0.560098	0.714457
328.2	0.1292	-0.0034	0.0541	0.1063	0.1088	0.0878	0.1623		328.2	0.05637	0.01965	0.02754	0.04723	0.01648	0.02236	0.02343										328.2	0.0575018	0.0187512	0.0254503	0.0466797	0.0154906	0.0212235	0.0220176										328.2	1.08979	0.84775	0.684795	1.20254	0.564471	0.739545
330.3	0.1288	-0.0023	0.0522	0.1028	0.1064	0.0866	0.1662		330.3	0.05603	0.02074	0.02575	0.04376	0.0141	0.02109	0.02721										330.3	0.0571618	0.0198412	0.0236603	0.0432097	0.0131106	0.0199535	0.0257976										330.3	1.08334	0.89703	0.636632	1.11315	0.477745	0.695292
332.4	0.1308	-0.0008	0.055	0.1002	0.112	0.0841	0.167		332.4	0.0581	0.02223	0.02867	0.04119	0.01972	0.01851	0.02789										332.4	0.0592318	0.0213312	0.0265803	0.0406397	0.0187306	0.0173735	0.0264776										332.4	1.12258	0.964393	0.7152	1.04694	0.682535	0.60539
334.5	0.1314	0.0044	0.0534	0.1014	0.117	0.0845	0.1672		334.5	0.05877	0.02743	0.02719	0.04241	0.02474	0.01884	0.02796										334.5	0.0599018	0.0265312	0.0251003	0.0418597	0.0237506	0.0177035	0.0265476										334.5	1.13527	1.19949	0.675378	1.07837	0.865461	0.616889
336.6	0.1306	0.0045	0.0529	0.1059	0.1185	0.0823	0.1645		336.6	0.05804	0.02752	0.0268	0.04694	0.02626	0.01657	0.02514										336.6	0.0591718	0.0266212	0.0247103	0.0463897	0.0252706	0.0154335	0.0237276										336.6	1.12144	1.20356	0.664884	1.19507	0.920849	0.53779
338.7	0.1286	0.0087	0.0556	0.1081	0.1211	0.0863	0.1597		338.7	0.05611	0.03171	0.02962	0.04917	0.02889	0.02049	0.02022										338.7	0.0572418	0.0308112	0.0275303	0.0486197	0.0279006	0.0193535	0.0188076										338.7	1.08486	1.39299	0.740762	1.25252	1.01668	0.674384
340.8	0.1312	0.0035	0.0592	0.1078	0.117	0.0812	0.1563		340.8	0.05878	0.02651	0.03334	0.0489	0.02481	0.01532	0.0167										340.8	0.0599118	0.0256112	0.0312503	0.0483497	0.0238206	0.0141835	0.0152876										340.8	1.13546	1.15789	0.840857	1.24556	0.868012	0.494233
342.9	0.132	0.0017	0.0594	0.1065	0.1143	0.0836	0.1601		342.9	0.05965	0.0247	0.03365	0.04763	0.02213	0.01764	0.02038										342.9	0.0607818	0.0238012	0.0315603	0.0470797	0.0211406	0.0165035	0.0189676										342.9	1.15195	1.07606	0.849198	1.21284	0.770354	0.575074
345	0.1293	-0.0015	0.0559	0.103	0.1128	0.0848	0.1558		345	0.05702	0.02149	0.03027	0.04415	0.02065	0.01877	0.01595										345	0.0581518	0.0205912	0.0281803	0.0435997	0.0196606	0.0176335	0.0145376										345	1.10211	0.930938	0.758252	1.12319	0.716424	0.61445
347.1	0.1305	-0.0022	0.0566	0.1034	0.1129	0.0836	0.1616		347.1	0.05828	0.02079	0.03108	0.04458	0.02077	0.0175	0.02163										347.1	0.0594118	0.0198912	0.0289903	0.0440297	0.0197806	0.0163635	0.0202176										347.1	1.12599	0.89929	0.780047	1.13427	0.720796	0.570196
349.2	0.1288	-0.0021	0.0552	0.1054	0.1105	0.0847	0.1651		349.2	0.05665	0.02088	0.0298	0.04661	0.0184	0.01852	0.02501										349.2	0.0577818	0.0199812	0.0277103	0.0460597	0.0174106	0.0173835	0.0235976										349.2	1.09509	0.903359	0.745605	1.18657	0.634435	0.605739
351.3	0.129	-0.0005	0.0548	0.1036	0.1133	0.0901	0.1633		351.3	0.05692	0.02248	0.02952	0.04484	0.02122	0.02385	0.02309										351.3	0.0580518	0.0215812	0.0274303	0.0442897	0.0202306	0.0227135	0.0216776										351.3	1.10021	0.975696	0.738071	1.14097	0.737194	0.791465
353.4	0.1293	-0.002	0.0591	0.1047	0.1176	0.0898	0.1616		353.4	0.05729	0.02097	0.03393	0.04596	0.02554	0.02347	0.02126										353.4	0.0584218	0.0200712	0.0318403	0.0454097	0.0245506	0.0223335	0.0198476										353.4	1.10722	0.907428	0.856732	1.16982	0.894613	0.778224
355.5	0.1277	0.0001	0.0566	0.1088	0.1177	0.0884	0.162		355.5	0.05576	0.02306	0.03155	0.05009	0.02566	0.022	0.02154										355.5	0.0568918	0.0221612	0.0294603	0.0495397	0.0246706	0.0208635	0.0201276										355.5	1.07823	1.00192	0.792693	1.27622	0.898985	0.727001
357.6	0.1258	0.003	0.0569	0.1104	0.119	0.0892	0.1564		357.6	0.05393	0.02596	0.03196	0.05172	0.02698	0.02273	0.01582										357.6	0.0550618	0.0250612	0.0298703	0.0511697	0.0259906	0.0215935	0.0144076										357.6	1.04354	1.13303	0.803725	1.31821	0.947085	0.752438
359.7	0.1274	0.0009	0.0577	0.1109	0.1126	0.0897	0.1592		359.7	0.0556	0.02385	0.03288	0.05225	0.02061	0.02315	0.0185										359.7	0.0567318	0.0229512	0.0307903	0.0516997	0.0196206	0.0220135	0.0170876										359.7	1.07519	1.03763	0.828479	1.33186	0.714966	0.767073
361.8	0.1292	-0.002	0.0573	0.1063	0.1077	0.0894	0.1602		361.8	0.05747	0.02094	0.0326	0.04768	0.01573	0.02278	0.01937										361.8	0.0586018	0.0200412	0.0305103	0.0471297	0.0147406	0.0216435	0.0179576										361.8	1.11064	0.906072	0.820945	1.21413	0.537141	0.754181
363.9	0.129	-0.0048	0.0601	0.1043	0.1076	0.092	0.1615		363.9	0.05733	0.01814	0.03551	0.0457	0.01565	0.0253	0.02055										363.9	0.0584618	0.0172412	0.0334203	0.0451497	0.0146606	0.0241635	0.0191376										363.9	1.10798	0.779483	0.899245	1.16312	0.534226	0.841991
366	0.1286	-0.0022	0.0565	0.1063	0.1085	0.089	0.1631		366	0.057	0.02073	0.03203	0.04773	0.01657	0.02223	0.02203										366	0.0581318	0.0198312	0.0299403	0.0471797	0.0155806	0.0210935	0.0206176										366	1.10173	0.896578	0.805608	1.21542	0.567751	0.735015
368.1	0.1308	0.0005	0.0554	0.1029	0.1081	0.0871	0.1608		368.1	0.05927	0.02342	0.03105	0.04436	0.01619	0.02026	0.01961										368.1	0.0604018	0.0225212	0.0289603	0.0438097	0.0152006	0.0191235	0.0181976										368.1	1.14475	1.01819	0.779239	1.1286	0.553904	0.66637
370.2	0.1323	0.0037	0.0612	0.1054	0.1119	0.0897	0.1599		370.2	0.06084	0.02662	0.03696	0.04689	0.02002	0.02278	0.01859										370.2	0.0619718	0.0257212	0.0348703	0.0463397	0.0190306	0.0216435	0.0171776										370.2	1.1745	1.16287	0.93826	1.19378	0.693467	0.754181
372.3	0.1304	0.0042	0.0614	0.1038	0.1113	0.088	0.1612		372.3	0.05901	0.02711	0.03728	0.04531	0.01944	0.02101	0.01976										372.3	0.0601418	0.0262112	0.0351903	0.0447597	0.0184506	0.0198735	0.0183476										372.3	1.13982	1.18502	0.946871	1.15308	0.672332	0.692504
374.4	0.13	0.0024	0.058	0.1041	0.1126	0.0897	0.162		374.4	0.05868	0.0253	0.03399	0.04564	0.02076	0.02263	0.02044										374.4	0.0598118	0.0244012	0.0319003	0.0450897	0.0197706	0.0214935	0.0190276										374.4	1.13357	1.10319	0.858346	1.16158	0.720432	0.748954
376.5	0.1306	0.0062	0.0527	0.1072	0.1156	0.0869	0.1572		376.5	0.05935	0.0291	0.02881	0.04877	0.02378	0.01976	0.01552										376.5	0.0604818	0.0282012	0.0267203	0.0482197	0.0227906	0.0186235	0.0141076										376.5	1.14627	1.27499	0.718967	1.24221	0.830479	0.648947
378.6	0.1298	0.0072	0.0495	0.1114	0.1119	0.093	0.1587		378.6	0.05862	0.03009	0.02573	0.053	0.0201	0.02579	0.0169										378.6	0.0597518	0.0291912	0.0236403	0.0524497	0.0191106	0.0246535	0.0154876										378.6	1.13243	1.31975	0.636094	1.35118	0.696382	0.859066
380.7	0.1279	0.0048	0.0514	0.1081	0.1102	0.0905	0.1601		380.7	0.05678	0.02768	0.02774	0.04973	0.01843	0.02321	0.01817										380.7	0.0579118	0.0267812	0.0256503	0.0491797	0.0174406	0.0220735	0.0167576										380.7	1.09756	1.21079	0.690177	1.26694	0.635528	0.769164
382.8	0.1281	0.0015	0.054	0.1052	0.1108	0.0902	0.1608		382.8	0.05705	0.02438	0.03046	0.04685	0.01905	0.02284	0.01875										382.8	0.0581818	0.0234812	0.0283703	0.0462997	0.0180606	0.0217035	0.0173376										382.8	1.10268	1.0616	0.763364	1.19275	0.65812	0.756271
384.9	0.1266	0	0.058	0.1018	0.1164	0.0894	0.1645		384.9	0.05562	0.02287	0.03457	0.04348	0.02467	0.02197	0.02233										384.9	0.0567518	0.0219712	0.0324803	0.0429297	0.0236806	0.0208335	0.0209176										384.9	1.07557	0.993328	0.873952	1.10593	0.86291	0.725956
387	0.1257	-0.0005	0.0571	0.1045	0.1162	0.0892	0.1625		387	0.05479	0.02236	0.03379	0.04621	0.02449	0.02169	0.02021										387	0.0559218	0.0214612	0.0317003	0.0456597	0.0235006	0.0205535	0.0187976										387	1.05984	0.970271	0.852965	1.17626	0.856351	0.716199
389.1	0.1257	0.0009	0.0615	0.1062	0.1169	0.0888	0.1612		389.1	0.05486	0.02376	0.03831	0.04794	0.02521	0.02122	0.01878										389.1	0.0559918	0.0228612	0.0362203	0.0473897	0.0242206	0.0200835	0.0173676										389.1	1.06117	1.03357	0.974585	1.22083	0.882588	0.699821
391.2	0.128	-0.0047	0.0622	0.1035	0.1158	0.0915	0.1613		391.2	0.05723	0.01815	0.03912	0.04526	0.02414	0.02384	0.01876										391.2	0.0583618	0.0172512	0.0370303	0.0447097	0.0231506	0.0227035	0.0173476										391.2	1.10609	0.779935	0.99638	1.15179	0.843597	0.791117
393.3	0.1265	-0.0056	0.06	0.104	0.12	0.0913	0.1628		393.3	0.0558	0.01724	0.03704	0.04579	0.02836	0.02357	0.02014										393.3	0.0569318	0.0163412	0.0349503	0.0452397	0.0273706	0.0224335	0.0187276										393.3	1.07898	0.738793	0.940413	1.16544	0.997372	0.781709
395.4	0.1301	-0.0053	0.0544	0.1036	0.1172	0.0897	0.1666		395.4	0.05947	0.01754	0.03155	0.04542	0.02558	0.0219	0.02382										395.4	0.0606018	0.0166412	0.0294603	0.0448697	0.0245906	0.0207635	0.0224076										395.4	1.14854	0.752356	0.792693	1.15591	0.89607	0.723516
397.5	0.1294	0.0029	0.0497	0.1047	0.1156	0.0947	0.1664		397.5	0.05883	0.02573	0.02697	0.04655	0.024	0.02682	0.0235										397.5	0.0599618	0.0248312	0.0248803	0.0459997	0.0230106	0.0256835	0.0220876										397.5	1.13641	1.12263	0.669458	1.18502	0.838496	0.894957
399.6	0.1229	0.0017	0.0506	0.1056	0.117	0.0924	0.1641		399.6	0.0524	0.02452	0.02799	0.04748	0.02542	0.02445	0.02107										399.6	0.0535318	0.0236212	0.0259003	0.0469297	0.0244306	0.0233135	0.0196576										399.6	1.01455	1.06793	0.696904	1.20898	0.89024	0.812373
401.7	0.1276	-0.0005	0.0542	0.1042	0.1137	0.0898	0.1665		401.7	0.05717	0.02232	0.0317	0.0461	0.02215	0.02177	0.02335										401.7	0.0583018	0.0214212	0.0296103	0.0455497	0.0211606	0.0206335	0.0219376										401.7	1.10495	0.968462	0.796729	1.17343	0.771083	0.718987
403.8	0.1278	-0.0013	0.0557	0.1041	0.1148	0.0936	0.1637		403.8	0.05744	0.02151	0.03332	0.04603	0.02327	0.0255	0.02043										403.8	0.0585718	0.0206112	0.0312303	0.0454797	0.0222806	0.0243635	0.0190176										403.8	1.11007	0.931842	0.840319	1.17163	0.811895	0.84896
405.9	0.1287	-0.001	0.0573	0.103	0.1127	0.0879	0.165		405.9	0.05841	0.0218	0.03504	0.04496	0.02119	0.01973	0.02161										405.9	0.0595418	0.0209012	0.0329503	0.0444097	0.0202006	0.0185935	0.0201976										405.9	1.12845	0.944953	0.886599	1.14406	0.736101	0.647902
408	0.1278	0.0008	0.0559	0.1051	0.1097	0.0914	0.1655		408	0.05758	0.0236	0.03375	0.04709	0.01821	0.02315	0.02198										408	0.0587118	0.0227012	0.0316603	0.0465397	0.0172206	0.0220135	0.0205676										408	1.11272	1.02633	0.851889	1.19893	0.627511	0.767073
410.1	0.129	-0.0007	0.0545	0.1071	0.1073	0.0919	0.1629		410.1	0.05885	0.02209	0.03247	0.04911	0.01583	0.02358	0.01926										410.1	0.0599818	0.0211912	0.0303803	0.0485597	0.0148406	0.0224435	0.0178476										410.1	1.13679	0.958064	0.817447	1.25097	0.540785	0.782057
412.2	0.1271	-0.0016	0.0473	0.1041	0.11	0.0908	0.1637		412.2	0.05702	0.02118	0.02538	0.04614	0.01856	0.0224	0.01994										412.2	0.0581518	0.0202812	0.0232903	0.0455897	0.0175706	0.0212635	0.0185276										412.2	1.10211	0.916922	0.626676	1.17446	0.640265	0.740939
414.3	0.1305	-0.002	0.0451	0.1029	0.1137	0.0933	0.1649		414.3	0.06048	0.02078	0.0233	0.04497	0.02228	0.02483	0.02102										414.3	0.0616118	0.0198812	0.0212103	0.0444197	0.0212906	0.0236935	0.0196076										414.3	1.16768	0.898838	0.570709	1.14432	0.77582	0.825614
416.4	0.1287	0.0005	0.0444	0.0994	0.117	0.0905	0.1656		416.4	0.05875	0.02327	0.02272	0.0415	0.0256	0.02196	0.0216										416.4	0.0598818	0.0223712	0.0206303	0.0409497	0.0246106	0.0208235	0.0201876										416.4	1.13489	1.01141	0.555103	1.05493	0.896799	0.725607
418.5	0.1271	0.0031	0.0487	0.1078	0.1183	0.0928	0.17		418.5	0.05722	0.02586	0.02713	0.04993	0.02692	0.02418	0.02587										418.5	0.0583518	0.0249612	0.0250403	0.0493797	0.0259306	0.0230435	0.0244576										418.5	1.1059	1.12851	0.673763	1.2721	0.944899	0.802964
420.6	0.1273	0.0048	0.0524	0.1047	0.1158	0.0899	0.1661		420.6	0.05749	0.02756	0.03095	0.04685	0.02444	0.02121	0.02185										420.6	0.0586218	0.0266612	0.0288603	0.0462997	0.0234506	0.0200735	0.0204376										420.6	1.11101	1.20536	0.776549	1.19275	0.854529	0.699473
422.7	0.13	-0.0001	0.0563	0.1048	0.1162	0.0915	0.1654		422.7	0.06026	0.02265	0.03496	0.04698	0.02487	0.02273	0.02103										422.7	0.0613918	0.0217512	0.0328703	0.0464297	0.0238806	0.0215935	0.0196176										422.7	1.16351	0.983382	0.884446	1.1961	0.870198	0.752438
424.8	0.13	-0.0019	0.0602	0.1028	0.112	0.092	0.1672		424.8	0.06033	0.02084	0.03898	0.04501	0.02069	0.02316	0.02271										424.8	0.0614618	0.0199412	0.0368903	0.0444597	0.0197006	0.0220235	0.0212976										424.8	1.16484	0.901551	0.992613	1.14535	0.717881	0.767422
426.9	0.1265	-0.0031	0.0574	0.1041	0.1095	0.0885	0.1666		426.9	0.0569	0.01964	0.0363	0.04634	0.01821	0.01959	0.02198										426.9	0.0580318	0.0187412	0.0342103	0.0457897	0.0172206	0.0184535	0.0205676										426.9	1.09983	0.847298	0.920502	1.17961	0.627511	0.643023
429	0.1268	-0.0005	0.0548	0.1035	0.1129	0.0906	0.1692		429	0.05726	0.02223	0.03381	0.04576	0.02163	0.02161	0.02446										429	0.0583918	0.0213312	0.0317203	0.0452097	0.0206406	0.0204735	0.0230476										429	1.10666	0.964393	0.853503	1.16467	0.752134	0.713411
431.1	0.1262	-0.002	0.056	0.1022	0.1151	0.0909	0.1723		431.1	0.05673	0.02073	0.03513	0.04449	0.02385	0.02184	0.02744										431.1	0.0578618	0.0198312	0.0330403	0.0439397	0.0228606	0.0207035	0.0260276										431.1	1.09661	0.896578	0.88902	1.13195	0.83303	0.721426
433.2	0.1257	-0.002	0.0533	0.1018	0.1171	0.0902	0.1686		433.2	0.0563	0.02072	0.03255	0.04412	0.02588	0.02106	0.02362										433.2	0.0574318	0.0198212	0.0304603	0.0435697	0.0248906	0.0199235	0.0222076										433.2	1.08846	0.896126	0.8196	1.12242	0.907002	0.694246
435.3	0.127	0.0021	0.0569	0.099	0.1207	0.092	0.1735		435.3	0.05767	0.02481	0.03626	0.04135	0.0295	0.02279	0.02839										435.3	0.0588018	0.0239112	0.0341703	0.0407997	0.0285106	0.0216535	0.0269776										435.3	1.11443	1.08104	0.919425	1.05106	1.03891	0.754529
437.4	0.1245	0.0052	0.057	0.1002	0.1208	0.094	0.1718		437.4	0.05524	0.02791	0.03648	0.04258	0.02962	0.02472	0.02657										437.4	0.0563718	0.0270112	0.0343903	0.0420297	0.0286306	0.0235835	0.0251576										437.4	1.06837	1.22119	0.925345	1.08275	1.04329	0.821781
439.5	0.1228	0.0062	0.0611	0.1042	0.1172	0.0901	0.1714		439.5	0.05361	0.0289	0.04069	0.0466	0.02604	0.02074	0.02605										439.5	0.0547418	0.0280012	0.0386003	0.0460497	0.0250506	0.0196035	0.0246376										439.5	1.03748	1.26595	1.03862	1.18631	0.912832	0.683096
441.6	0.1266	0.0001	0.0612	0.1019	0.1187	0.0947	0.1712		441.6	0.05748	0.02279	0.04091	0.04433	0.02756	0.02527	0.02573										441.6	0.0586118	0.0218912	0.0388203	0.0437797	0.0265706	0.0241335	0.0243176										441.6	1.11082	0.989711	1.04454	1.12783	0.96822	0.840946
443.7	0.1291	-0.003	0.0597	0.1001	0.1149	0.0964	0.1678		443.7	0.06005	0.01969	0.03953	0.04256	0.02379	0.02689	0.02221										443.7	0.0611818	0.0187912	0.0374403	0.0420097	0.0228006	0.0257535	0.0207976										443.7	1.15953	0.849559	1.00741	1.08223	0.830844	0.897396
445.8	0.1283	-0.0038	0.0591	0.1005	0.1133	0.0937	0.1688		445.8	0.05931	0.01888	0.03904	0.04299	0.02221	0.02412	0.02308										445.8	0.0604418	0.0179812	0.0369503	0.0424397	0.0212206	0.0229835	0.0216676										445.8	1.14551	0.812938	0.994227	1.09331	0.773269	0.800874
447.9	0.1263	-0.0024	0.0548	0.1024	0.1156	0.0936	0.1716		447.9	0.05738	0.02027	0.03486	0.04491	0.02453	0.02395	0.02576										447.9	0.0585118	0.0193712	0.0327703	0.0443597	0.0235406	0.0228135	0.0243476										447.9	1.10893	0.875781	0.881755	1.14277	0.857809	0.79495
450	0.1318	-0.0028	0.0528	0.0994	0.1168	0.0959	0.1743		450	0.06295	0.01987	0.03297	0.04194	0.02575	0.02617	0.02834										450	0.0640818	0.0189712	0.0308803	0.0413897	0.0247606	0.0250335	0.0269276										450	1.21449	0.857697	0.830901	1.06626	0.902265	0.872307
452.1	0.1316	-0.0028	0.0531	0.095	0.1183	0.0954	0.1698		452.1	0.06282	0.01986	0.03339	0.03757	0.02727	0.0256	0.02372										452.1	0.0639518	0.0189612	0.0313003	0.0370197	0.0262806	0.0244635	0.0223076										452.1	1.21203	0.857245	0.842202	0.953684	0.957653	0.852445
454.2	0.1295	-0.0026	0.0567	0.0972	0.1198	0.0954	0.1725		454.2	0.06079	0.02005	0.03711	0.0398	0.0288	0.02552	0.02629										454.2	0.0619218	0.0191512	0.0350203	0.0392497	0.0278106	0.0243835	0.0248776										454.2	1.17356	0.865835	0.942296	1.01113	1.01341	0.849657
456.3	0.1304	0.0023	0.0559	0.0994	0.1183	0.0938	0.1708		456.3	0.06176	0.02495	0.03642	0.04203	0.02732	0.02385	0.02447										456.3	0.0628918	0.0240512	0.0343303	0.0414797	0.0263306	0.0227135	0.0230576										456.3	1.19194	1.08737	0.923731	1.06858	0.959475	0.791465
458.4	0.1299	0.0052	0.0535	0.102	0.1148	0.0931	0.1706		458.4	0.06133	0.02784	0.03414	0.04465	0.02384	0.02308	0.02415										458.4	0.0624618	0.0269412	0.0320503	0.0440997	0.0228506	0.0219435	0.0227376										458.4	1.18379	1.21802	0.862382	1.13608	0.832666	0.764634
460.5	0.1292	0.0049	0.0556	0.1007	0.1129	0.0924	0.17		460.5	0.0607	0.02753	0.03635	0.04338	0.02196	0.0223	0.02343										460.5	0.0618318	0.0266312	0.0342603	0.0428297	0.0209706	0.0211635	0.0220176										460.5	1.17185	1.20401	0.921847	1.10336	0.764159	0.737455
462.6	0.1308	0.0024	0.0573	0.1013	0.1142	0.0948	0.1663		462.6	0.06236	0.02503	0.03817	0.04401	0.02328	0.02463	0.01961										462.6	0.0634918	0.0241312	0.0360803	0.0434597	0.0222906	0.0234935	0.0181976										462.6	1.20331	1.09098	0.970818	1.11959	0.812259	0.818645
464.7	0.1292	0.0021	0.0549	0.0999	0.1134	0.0944	0.1722		464.7	0.06083	0.02472	0.03589	0.04264	0.02251	0.02416	0.02538										464.7	0.0619618	0.0238212	0.0338003	0.0420897	0.0215206	0.0230235	0.0239676										464.7	1.17431	1.07697	0.90947	1.08429	0.784201	0.802267
466.8	0.1304	-0.002	0.0541	0.0992	0.1143	0.0936	0.1754		466.8	0.0621	0.02061	0.0352	0.04196	0.02343	0.02328	0.02846										466.8	0.0632318	0.0197112	0.0331103	0.0414097	0.0224406	0.0221435	0.0270476										466.8	1.19838	0.891152	0.890904	1.06678	0.817725	0.771603
468.9	0.1286	0.0052	0.0549	0.1002	0.1157	0.093	0.177		468.9	0.06037	0.02781	0.03612	0.04299	0.02485	0.02261	0.02994										468.9	0.0615018	0.0269112	0.0340303	0.0424397	0.0238606	0.0214735	0.0285276										468.9	1.1656	1.21667	0.915658	1.09331	0.869469	0.748257
471	0.1269	0.0021	0.0549	0.1005	0.1193	0.0962	0.1741		471	0.05874	0.0247	0.03624	0.04332	0.02847	0.02573	0.02692										471	0.0598718	0.0238012	0.0341503	0.0427697	0.0274806	0.0245935	0.0255076										471	1.1347	1.07606	0.918887	1.10181	1.00138	0.856975
473.1	0.125	-0.001	0.0537	0.0984	0.1177	0.0936	0.1728		473.1	0.05691	0.02159	0.03515	0.04125	0.02689	0.02306	0.02549										473.1	0.0580418	0.0206912	0.0330603	0.0406997	0.0259006	0.0219235	0.0240776										473.1	1.10002	0.935459	0.889559	1.04849	0.943806	0.763937
475.2	0.128	-0.0008	0.0531	0.1013	0.1202	0.0979	0.1727		475.2	0.05998	0.02179	0.03467	0.04417	0.02942	0.02729	0.02527										475.2	0.0611118	0.0208912	0.0325803	0.0436197	0.0284306	0.0261535	0.0238576										475.2	1.15821	0.944501	0.876643	1.12371	1.036	0.911334
477.3	0.1195	0.0019	0.0506	0.1012	0.1134	0.0965	0.1705		477.3	0.05155	0.02448	0.03228	0.0441	0.02264	0.02581	0.02295										477.3	0.0526818	0.0235812	0.0301903	0.0435497	0.0216506	0.0246735	0.0215376										477.3	0.998438	1.06612	0.812335	1.12191	0.788938	0.859763
479.4	0.1235	0.004	0.0521	0.1008	0.1107	0.0963	0.1705		479.4	0.05561	0.02657	0.0339	0.04373	0.01996	0.02554	0.02283										479.4	0.0567418	0.0256712	0.0318103	0.0431797	0.0189706	0.0244035	0.0214176										479.4	1.07538	1.16061	0.855925	1.11237	0.69128	0.850354
481.5	0.1233	0.0027	0.0515	0.1022	0.1105	0.0971	0.1729		481.5	0.05548	0.02527	0.03342	0.04516	0.01978	0.02626	0.0251										481.5	0.0566118	0.0243712	0.0313303	0.0446097	0.0187906	0.0251235	0.0236876										481.5	1.07292	1.10183	0.843009	1.14921	0.684721	0.875443
483.6	0.1229	-0.0006	0.0512	0.1012	0.1128	0.0986	0.1759		483.6	0.05515	0.02196	0.03323	0.04419	0.0221	0.02769	0.02798										483.6	0.0562818	0.0210612	0.0311403	0.0436397	0.0211106	0.0265535	0.0265676										483.6	1.06667	0.952187	0.837897	1.12423	0.769261	0.925272
485.7	0.1268	-0.0007	0.0506	0.0995	0.1158	0.0992	0.177		485.7	0.05912	0.02185	0.03275	0.04251	0.02513	0.02822	0.02896										485.7	0.0602518	0.0209512	0.0306603	0.0419597	0.0241406	0.0270835	0.0275476										485.7	1.14191	0.947213	0.824981	1.08095	0.879672	0.94374
487.8	0.127	-0.0002	0.0515	0.0978	0.1159	0.0988	0.1758		487.8	0.05939	0.02235	0.03376	0.04084	0.02525	0.02774	0.02764										487.8	0.0605218	0.0214512	0.0316703	0.0402897	0.0242606	0.0266035	0.0262276										487.8	1.14702	0.969819	0.852158	1.03792	0.884045	0.927014
489.9	0.127	0.0009	0.0513	0.0987	0.1162	0.0964	0.1751		489.9	0.05946	0.02344	0.03368	0.04177	0.02557	0.02527	0.02682										489.9	0.0605918	0.0225412	0.0315903	0.0412197	0.0245806	0.0241335	0.0254076										489.9	1.14835	1.0191	0.850005	1.06188	0.895706	0.840946
492	0.1273	-0.0009	0.0485	0.0986	0.1148	0.0994	0.1727		492	0.05983	0.02163	0.031	0.0417	0.02419	0.02819	0.02429										492	0.0609618	0.0207312	0.0289103	0.0411497	0.0232006	0.0270535	0.0228776										492	1.15536	0.937267	0.777894	1.06008	0.845419	0.942695
494.1	0.1226	-0.001	0.0481	0.0969	0.1159	0.1013	0.1713		494.1	0.0552	0.02153	0.03071	0.04002	0.02531	0.03002	0.02277										494.1	0.0563318	0.0206312	0.0286203	0.0394697	0.0243206	0.0288835	0.0213576										494.1	1.06761	0.932746	0.770091	1.0168	0.886232	1.00646
496.2	0.1286	0.0003	0.0443	0.0951	0.1144	0.1007	0.1718		496.2	0.06126	0.02282	0.02703	0.03825	0.02383	0.02935	0.02315										496.2	0.0623918	0.0219212	0.0249403	0.0376997	0.0228406	0.0282135	0.0217376										496.2	1.18246	0.991068	0.671073	0.971202	0.832301	0.983116
498.3	0.1276	0.0051	0.0424	0.0969	0.1133	0.0962	0.1695		498.3	0.06033	0.02761	0.02524	0.04008	0.02276	0.02477	0.02073										498.3	0.0614618	0.0267112	0.0231503	0.0395297	0.0217706	0.0236335	0.0193176										498.3	1.16484	1.20763	0.622909	1.01835	0.793311	0.823523
500.4	0.1262	0.0033	0.042	0.098	0.1177	0.1005	0.1757		500.4	0.059	0.02581	0.02496	0.04121	0.02718	0.029	0.0268										500.4	0.0601318	0.0249112	0.0228703	0.0406597	0.0261906	0.0278635	0.0253876										500.4	1.13963	1.12625	0.615375	1.04746	0.954373	0.97092
502.5	0.1244	-0.0031	0.0457	0.0978	0.1192	0.1008	0.1738		502.5	0.05727	0.0194	0.02878	0.04104	0.0287	0.02922	0.02478										502.5	0.0584018	0.0185012	0.0266903	0.0404897	0.0277106	0.0280835	0.0233676										502.5	1.10684	0.836448	0.71816	1.04308	1.00976	0.978586
504.6	0.1231	-0.002	0.046	0.0966	0.1202	0.0995	0.1783		504.6	0.05604	0.02049	0.02919	0.03986	0.02972	0.02785	0.02916										504.6	0.0571718	0.0195912	0.0271003	0.0393097	0.0287306	0.0267135	0.0277476										504.6	1.08353	0.885727	0.729192	1.01268	1.04693	0.930847
506.7	0.1211	0.0007	0.0454	0.0981	0.1208	0.0984	0.1808		506.7	0.05411	0.02319	0.02871	0.04139	0.03034	0.02668	0.03154										506.7	0.0552418	0.0222912	0.0266203	0.0408397	0.0293506	0.0255435	0.0301276										506.7	1.04696	1.0078	0.716277	1.05209	1.06952	0.890078
508.8	0.1215	0.0016	0.0505	0.0991	0.1188	0.0935	0.1776		508.8	0.05458	0.02408	0.03393	0.04242	0.02837	0.0217	0.02821										508.8	0.0557118	0.0231812	0.0318403	0.0418697	0.0273806	0.0205635	0.0267976										508.8	1.05586	1.04803	0.856732	1.07863	0.997736	0.716547
510.9	0.1244	0.0015	0.0484	0.0977	0.117	0.0973	0.1744		510.9	0.05755	0.02398	0.03194	0.04105	0.02659	0.02543	0.02489										510.9	0.0586818	0.0230812	0.0298503	0.0404997	0.0256006	0.0242935	0.0234776										510.9	1.11215	1.04351	0.803187	1.04333	0.932874	0.846521
513	0.1218	0.0009	0.0469	0.0971	0.1141	0.0986	0.1725		513	0.05501	0.02337	0.03056	0.04047	0.02371	0.02665	0.02287										513	0.0561418	0.0224712	0.0284703	0.0399197	0.0227206	0.0255135	0.0214576										513	1.06401	1.01593	0.766055	1.02839	0.827928	0.889033
515.1	0.1212	0.0003	0.0443	0.0984	0.1163	0.0972	0.1706		515.1	0.05448	0.02276	0.02807	0.0418	0.02593	0.02518	0.02085										515.1	0.0556118	0.0218612	0.0259803	0.0412497	0.0249406	0.0240435	0.0194376										515.1	1.05397	0.988355	0.699056	1.06266	0.908824	0.83781
517.2	0.1199	0.0016	0.0479	0.0961	0.1144	0.1014	0.1757		517.2	0.05325	0.02406	0.03179	0.03953	0.02405	0.02931	0.02583										517.2	0.0543818	0.0231612	0.0297003	0.0389797	0.0230606	0.0281735	0.0244176										517.2	1.03066	1.04713	0.799151	1.00418	0.840318	0.981722
519.3	0.122	-0.001	0.0515	0.0973	0.1154	0.0979	0.1792		519.3	0.05542	0.02145	0.03551	0.04076	0.02508	0.02573	0.0292										519.3	0.0565518	0.0205512	0.0334203	0.0402097	0.0240906	0.0245935	0.0277876										519.3	1.07178	0.929129	0.899245	1.03586	0.87785	0.856975
521.4	0.1197	0.003	0.0528	0.0988	0.1165	0.1018	0.1769		521.4	0.05319	0.02544	0.03692	0.04229	0.0262	0.02956	0.02678										521.4	0.0543218	0.0245412	0.0348303	0.0417397	0.0252106	0.0284235	0.0253676										521.4	1.02952	1.10952	0.937184	1.07528	0.918663	0.990433
523.5	0.123	0.0015	0.0522	0.0983	0.1206	0.0981	0.179		523.5	0.05656	0.02394	0.03644	0.04181	0.03032	0.02578	0.02876										523.5	0.0576918	0.0230412	0.0343503	0.0412597	0.0293306	0.0246435	0.0273476										523.5	1.09339	1.0417	0.924269	1.06291	1.06879	0.858717
525.6	0.1201	-0.0003	0.0494	0.0967	0.1212	0.1008	0.1797		525.6	0.05373	0.02213	0.03375	0.04024	0.03094	0.02841	0.02934										525.6	0.0548618	0.0212312	0.0316603	0.0396897	0.0299506	0.0272735	0.0279276										525.6	1.03975	0.959872	0.851889	1.02247	1.09139	0.950361
527.7	0.1199	-0.0016	0.0486	0.1012	0.1205	0.1012	0.174		527.7	0.0536	0.02082	0.03307	0.04477	0.03026	0.02874	0.02351										527.7	0.0547318	0.0199212	0.0309803	0.0442197	0.0292706	0.0276035	0.0220976										527.7	1.03729	0.900647	0.833592	1.13917	1.06661	0.96186
529.8	0.1231	-0.0022	0.0436	0.1038	0.1135	0.1026	0.172		529.8	0.05686	0.02022	0.02819	0.0474	0.02329	0.03006	0.02139										529.8	0.0579918	0.0193212	0.0261003	0.0468497	0.0223006	0.0289235	0.0199776										529.8	1.09907	0.87352	0.702285	1.20692	0.812624	1.00786
531.9	0.122	-0.0045	0.043	0.0994	0.1164	0.1018	0.1695		531.9	0.05583	0.01791	0.0277	0.04302	0.02621	0.02919	0.01877										531.9	0.0569618	0.0170112	0.0256103	0.0424697	0.0252206	0.0280535	0.0173576										531.9	1.07955	0.769084	0.689101	1.09408	0.919027	0.97754
534	0.1247	-0.0048	0.0391	0.0917	0.1166	0.1	0.1711		534	0.0586	0.0176	0.02392	0.03535	0.02643	0.02732	0.02025										534	0.0597318	0.0167012	0.0218303	0.0347997	0.0254406	0.0261835	0.0188376										534	1.13205	0.755069	0.587392	0.896493	0.927044	0.912379
536.1	0.1265	-0.0027	0.0405	0.0951	0.1188	0.1007	0.1768		536.1	0.06047	0.0197	0.02544	0.03878	0.02865	0.02794	0.02583										536.1	0.0616018	0.0188012	0.0233503	0.0382297	0.0276606	0.0268035	0.0244176										536.1	1.16749	0.850011	0.62829	0.984855	1.00794	0.933984
538.2	0.1244	0.0001	0.0431	0.0985	0.1191	0.1009	0.1765		538.2	0.05844	0.02249	0.02815	0.04221	0.02897	0.02807	0.0254										538.2	0.0595718	0.0215912	0.0260603	0.0416597	0.0279806	0.0269335	0.0239876										538.2	1.12902	0.976148	0.701209	1.07322	1.0196	0.938513
540.3	0.1233	0.0023	0.0476	0.0958	0.1192	0.102	0.1754		540.3	0.05741	0.02468	0.03277	0.03954	0.0291	0.02909	0.02418										540.3	0.0585418	0.0237812	0.0306803	0.0389897	0.0281106	0.0279535	0.0227676										540.3	1.1095	1.07516	0.82552	1.00443	1.02434	0.974056
542.4	0.1236	0.0034	0.0485	0.0981	0.1211	0.103	0.1775		542.4	0.05778	0.02578	0.03378	0.04186	0.03102	0.03002	0.02616										542.4	0.0589118	0.0248812	0.0316903	0.0413097	0.0300306	0.0288835	0.0247476										542.4	1.11651	1.12489	0.852696	1.0642	1.0943	1.00646
544.5	0.1204	0.0058	0.0541	0.0992	0.1192	0.1031	0.1751		544.5	0.05465	0.02817	0.0395	0.04299	0.02914	0.03005	0.02364										544.5	0.0557818	0.0272712	0.0374103	0.0424397	0.0281506	0.0289135	0.0222276										544.5	1.05719	1.23294	1.0066	1.09331	1.02579	1.00751
546.6	0.1224	0.0037	0.0528	0.0986	0.1178	0.1026	0.1728		546.6	0.05671	0.02606	0.03832	0.04242	0.02776	0.02947	0.02121										546.6	0.0578418	0.0251612	0.0362303	0.0418697	0.0267706	0.0283335	0.0197976										546.6	1.09623	1.13755	0.974854	1.07863	0.975508	0.987297
548.7	0.122	0.0038	0.0481	0.1015	0.1197	0.1012	0.1728		548.7	0.05638	0.02616	0.03373	0.04535	0.02968	0.028	0.02109										548.7	0.0575118	0.0252612	0.0316403	0.0447997	0.0286906	0.0268635	0.0196776										548.7	1.08998	1.14207	0.85135	1.15411	1.04547	0.936074
550.8	0.1226	0.0047	0.0442	0.0995	0.1173	0.0985	0.1695		550.8	0.05705	0.02705	0.02995	0.04337	0.02731	0.02522	0.01767										550.8	0.0581818	0.0261512	0.0278603	0.0428197	0.0263206	0.0240835	0.0162576										550.8	1.10268	1.18231	0.749642	1.1031	0.95911	0.839204
552.9	0.1228	0.0038	0.046	0.0991	0.1184	0.1005	0.1726		552.9	0.05732	0.02614	0.03186	0.043	0.02843	0.02715	0.02065										552.9	0.0584518	0.0252412	0.0297703	0.0424497	0.0274406	0.0260135	0.0192376										552.9	1.10779	1.14117	0.801034	1.09357	0.999923	0.906456
555	0.1211	0.0009	0.046	0.0979	0.1205	0.1023	0.1772		555	0.05569	0.02324	0.03198	0.04183	0.03055	0.02888	0.02512										555	0.0568218	0.0223412	0.0298903	0.0412797	0.0295606	0.0277435	0.0237076										555	1.0769	1.01006	0.804263	1.06343	1.07717	0.966738
557.1	0.1204	0.0015	0.0522	0.0983	0.1222	0.1009	0.1762		557.1	0.05506	0.02383	0.0383	0.04226	0.03227	0.0274	0.024										557.1	0.0561918	0.0229312	0.0362103	0.0417097	0.0312806	0.0262635	0.0225876										557.1	1.06496	1.03673	0.974316	1.07451	1.13985	0.915167
559.2	0.1224	0.0047	0.0524	0.0992	0.1201	0.103	0.1765		559.2	0.05713	0.02702	0.03861	0.04319	0.03019	0.02943	0.02418										559.2	0.0582618	0.0261212	0.0365203	0.0426397	0.0292006	0.0282935	0.0227676										559.2	1.10419	1.18095	0.982657	1.09846	1.06406	0.985903
561.3	0.1177	0.0053	0.054	0.0988	0.119	0.1055	0.1781		561.3	0.0525	0.02762	0.04033	0.04281	0.02912	0.03185	0.02566										561.3	0.0536318	0.0267212	0.0382403	0.0422597	0.0281306	0.0307135	0.0242476										561.3	1.01644	1.20808	1.02894	1.08867	1.02507	1.07023
563.4	0.1243	0.001	0.0542	0.1048	0.1208	0.1029	0.1749		563.4	0.05916	0.02331	0.04064	0.04884	0.03094	0.02918	0.02234										563.4	0.0602918	0.0224112	0.0385503	0.0482897	0.0299506	0.0280435	0.0209276										563.4	1.14266	1.01322	1.03728	1.24402	1.09139	0.977192
565.5	0.1264	0.0009	0.0504	0.1013	0.1198	0.1038	0.179		565.5	0.06133	0.0232	0.03696	0.04537	0.02996	0.03001	0.02631										565.5	0.0624618	0.0223012	0.0348703	0.0448197	0.0289706	0.0288735	0.0248976										565.5	1.18379	1.00825	0.93826	1.15462	1.05568	1.00611
567.6	0.1242	0.0021	0.05	0.1005	0.1179	0.0999	0.1797		567.6	0.0592	0.0244	0.03668	0.0446	0.02808	0.02603	0.02689										567.6	0.0603318	0.0235012	0.0345903	0.0440497	0.0270906	0.0248935	0.0254776										567.6	1.14342	1.0625	0.930726	1.13479	0.987169	0.867429
569.7	0.1235	0.0034	0.0443	0.0973	0.1177	0.1044	0.1764		569.7	0.05857	0.02569	0.03109	0.04142	0.0279	0.03046	0.02347										569.7	0.0597018	0.0247912	0.0290003	0.0408697	0.0269106	0.0293235	0.0220576										569.7	1.13148	1.12082	0.780316	1.05287	0.98061	1.02179
571.8	0.1268	-0.0003	0.0437	0.0981	0.117	0.1011	0.1818		571.8	0.06194	0.02198	0.03061	0.04225	0.02723	0.02708	0.02875										571.8	0.0630718	0.0210812	0.0285203	0.0416997	0.0262406	0.0259435	0.0273376										571.8	1.19535	0.953091	0.7674	1.07425	0.956195	0.904016
573.9	0.1307	-0.0007	0.0474	0.0924	0.117	0.1034	0.182		573.9	0.06591	0.02158	0.03443	0.03658	0.02725	0.02931	0.02882										573.9	0.0670418	0.0206812	0.0323403	0.0360297	0.0262606	0.0281735	0.0274076										573.9	1.27059	0.935007	0.870185	0.92818	0.956924	0.981722
576	0.1286	-0.001	0.0448	0.0957	0.1195	0.1027	0.1805		576	0.06388	0.02127	0.03194	0.03991	0.02977	0.02854	0.0272										576	0.0650118	0.0203712	0.0298503	0.0393597	0.0287806	0.0274035	0.0257876										576	1.23212	0.920991	0.803187	1.01397	1.04875	0.954891
578.1	0.1264	0.0029	0.0426	0.097	0.1158	0.1022	0.1821		578.1	0.06175	0.02516	0.02986	0.04124	0.02609	0.02796	0.02868										578.1	0.0628818	0.0242612	0.0277703	0.0406897	0.0251006	0.0268235	0.0272676										578.1	1.19175	1.09686	0.74722	1.04823	0.914654	0.93468
580.2	0.1306	0.0048	0.0466	0.0979	0.1105	0.1036	0.1781		580.2	0.06601	0.02706	0.03397	0.04216	0.02081	0.02929	0.02456										580.2	0.0671418	0.0261612	0.0318803	0.0416097	0.0198206	0.0281535	0.0231476										580.2	1.27249	1.18276	0.857808	1.07193	0.722254	0.981025
582.3	0.1287	0	0.0486	0.0995	0.112	0.1049	0.177		582.3	0.06418	0.02225	0.03609	0.04379	0.02234	0.03051	0.02333										582.3	0.0653118	0.0213512	0.0340003	0.0432397	0.0213506	0.0293735	0.0219176										582.3	1.2378	0.965298	0.914851	1.11392	0.778006	1.02354
584.4	0.1257	0.0016	0.0462	0.0948	0.1143	0.1001	0.1762		584.4	0.06125	0.02385	0.03381	0.03912	0.02466	0.02564	0.02241										584.4	0.0623818	0.0229512	0.0317203	0.0385697	0.0236706	0.0245035	0.0209976										584.4	1.18227	1.03763	0.853503	0.993614	0.862546	0.853839
586.5	0.1271	-0.0006	0.0431	0.0958	0.118	0.0999	0.1776		586.5	0.06272	0.02164	0.03082	0.04015	0.02838	0.02537	0.02369										586.5	0.0638518	0.0207412	0.0287303	0.0395997	0.0273906	0.0242335	0.0222776										586.5	1.21013	0.937719	0.773051	1.02015	0.998101	0.84443
588.6	0.1263	0.0019	0.0421	0.0981	0.1191	0.1004	0.1829		588.6	0.06199	0.02413	0.02994	0.04247	0.0295	0.02579	0.02887										588.6	0.0631218	0.0232312	0.0278503	0.0419197	0.0285106	0.0246535	0.0274576										588.6	1.1963	1.05029	0.749372	1.07992	1.03891	0.859066
590.7	0.1287	0.0014	0.0438	0.0951	0.119	0.0994	0.182		590.7	0.06446	0.02363	0.03175	0.0395	0.02942	0.02472	0.02785										590.7	0.0655918	0.0227312	0.0296603	0.0389497	0.0284306	0.0235835	0.0264376										590.7	1.24311	1.02769	0.798074	1.0034	1.036	0.821781
592.8	0.125	0.0026	0.045	0.0923	0.1164	0.0991	0.179		592.8	0.06083	0.02482	0.03307	0.03673	0.02685	0.02434	0.02472										592.8	0.0619618	0.0239212	0.0309803	0.0361797	0.0258606	0.0232035	0.0233076										592.8	1.17431	1.08149	0.833592	0.932044	0.942348	0.80854
594.9	0.1255	0.0072	0.0431	0.0971	0.118	0.1005	0.1797		594.9	0.0614	0.02941	0.03129	0.04156	0.02847	0.02567	0.0253										594.9	0.0625318	0.0285112	0.0292003	0.0410097	0.0274806	0.0245335	0.0238876										594.9	1.18512	1.289	0.785697	1.05647	1.00138	0.854884
597	0.1213	0.0078	0.0415	0.0957	0.1157	0.1018	0.1761		597	0.05726	0.03001	0.0298	0.04019	0.02619	0.0269	0.02158										597	0.0583918	0.0291112	0.0277103	0.0396397	0.0252006	0.0257635	0.0201676										597	1.10666	1.31613	0.745605	1.02118	0.918298	0.897744
599.1	0.1231	0.0085	0.0424	0.0981	0.1166	0.1001	0.1784		599.1	0.05913	0.0307	0.03082	0.04261	0.02711	0.02512	0.02376										599.1	0.0602618	0.0298012	0.0287303	0.0420597	0.0261206	0.0239835	0.0223476										599.1	1.1421	1.34733	0.773051	1.08352	0.951823	0.835719
601.2	0.1254	0.0052	0.0462	0.0979	0.1169	0.1023	0.1795		601.2	0.0615	0.02739	0.03473	0.04244	0.02743	0.02725	0.02473										601.2	0.0626318	0.0264912	0.0326403	0.0418897	0.0264406	0.0261135	0.0233176										601.2	1.18701	1.19768	0.878258	1.07914	0.963483	0.90994
603.3	0.1287	0.0045	0.0498	0.0959	0.1197	0.1047	0.178		603.3	0.06487	0.02669	0.03845	0.04047	0.03026	0.02958	0.02311										603.3	0.0660018	0.0257912	0.0363603	0.0399197	0.0292706	0.0284435	0.0216976										603.3	1.25088	1.16603	0.978352	1.02839	1.06661	0.99113
605.4	0.1287	0.002	0.0494	0.0915	0.1198	0.0994	0.1799		605.4	0.06494	0.02418	0.03817	0.0361	0.03038	0.0242	0.02489										605.4	0.0660718	0.0232812	0.0360803	0.0355497	0.0293906	0.0230635	0.0234776										605.4	1.25221	1.05255	0.970818	0.915815	1.07098	0.803661
607.5	0.125	0.0008	0.0476	0.093	0.1186	0.1007	0.1828		607.5	0.06131	0.02297	0.03648	0.03762	0.0292	0.02543	0.02767										607.5	0.0624418	0.0220712	0.0343903	0.0370697	0.0282106	0.0242935	0.0262576										607.5	1.18341	0.997849	0.925345	0.954972	1.02798	0.846521
609.6	0.1244	0.0008	0.0484	0.0899	0.1171	0.0985	0.1838		609.6	0.06078	0.02297	0.0374	0.03455	0.02772	0.02315	0.02855										609.6	0.0619118	0.0220712	0.0353103	0.0339997	0.0267306	0.0220135	0.0271376										609.6	1.17337	0.997849	0.9501	0.875884	0.974051	0.767073
611.7	0.1269	-0.0064	0.0487	0.0909	0.1142	0.0998	0.1806		611.7	0.06335	0.01576	0.03782	0.03558	0.02484	0.02438	0.02522										611.7	0.0644818	0.0148612	0.0357303	0.0350297	0.0238506	0.0232435	0.0238076										611.7	1.22207	0.671882	0.961401	0.902419	0.869105	0.809933
613.8	0.127	-0.0065	0.0456	0.0867	0.1114	0.1	0.1812		613.8	0.06351	0.01565	0.03483	0.03141	0.02207	0.02451	0.0257										613.8	0.0646418	0.0147512	0.0327403	0.0308597	0.0210806	0.0233735	0.0242876										613.8	1.22511	0.666909	0.880948	0.794993	0.768168	0.814463
615.9	0.1268	-0.001	0.0438	0.0888	0.1109	0.0994	0.1793		615.9	0.06338	0.02115	0.03315	0.03354	0.02159	0.02383	0.02368										615.9	0.0645118	0.0202512	0.0310603	0.0329897	0.0206006	0.0226935	0.0222676										615.9	1.22264	0.915566	0.835744	0.849865	0.750677	0.790768
618	0.1302	0	0.0392	0.0895	0.1134	0.1007	0.18		618	0.06685	0.02214	0.02866	0.03426	0.02411	0.02506	0.02426										618	0.0679818	0.0212412	0.0265703	0.0337097	0.0231206	0.0239235	0.0228476										618	1.28841	0.960324	0.714931	0.868413	0.842504	0.833628
620.1	0.1312	0.0033	0.0387	0.0954	0.1154	0.1009	0.1813		620.1	0.06792	0.02543	0.02828	0.04019	0.02613	0.02518	0.02543										620.1	0.0690518	0.0245312	0.0261903	0.0396397	0.0251406	0.0240435	0.0240176										620.1	1.30869	1.10907	0.704707	1.02118	0.916112	0.83781
622.2	0.1333	0.0021	0.0395	0.0921	0.1205	0.1026	0.1809		622.2	0.07009	0.02423	0.0292	0.03692	0.03125	0.02681	0.02491										622.2	0.0712218	0.0233312	0.0271103	0.0363697	0.0302606	0.0256735	0.0234976										622.2	1.34981	1.05481	0.729461	0.936939	1.10268	0.894608
624.3	0.1305	0.0015	0.0393	0.0933	0.1242	0.1018	0.1834		624.3	0.06736	0.02362	0.02911	0.03815	0.03498	0.02594	0.02729										624.3	0.0684918	0.0227212	0.0270203	0.0375997	0.0339906	0.0248035	0.0258776										624.3	1.29807	1.02724	0.72704	0.968626	1.2386	0.864292
626.4	0.128	0.005	0.0415	0.0912	0.1201	0.1006	0.1811		626.4	0.06493	0.02711	0.03143	0.03607	0.0309	0.02466	0.02487										626.4	0.0660618	0.0262112	0.0293403	0.0355197	0.0299106	0.0235235	0.0234576										626.4	1.25202	1.18502	0.789464	0.915042	1.08993	0.81969
628.5	0.1242	0.0014	0.0405	0.0922	0.1197	0.1009	0.1823		628.5	0.0612	0.02351	0.03054	0.0371	0.03052	0.02489	0.02594										628.5	0.0623318	0.0226112	0.0284503	0.0365497	0.0295306	0.0237535	0.0245276										628.5	1.18133	1.02226	0.765517	0.941576	1.07608	0.827705
630.6	0.125	-0.0009	0.0454	0.0958	0.1137	0.1019	0.1854		630.6	0.06206	0.0212	0.03556	0.04073	0.02454	0.02581	0.02892										630.6	0.0631918	0.0203012	0.0334703	0.0401797	0.0235506	0.0246735	0.0275076										630.6	1.19763	0.917827	0.90059	1.03509	0.858173	0.859763
632.7	0.1245	-0.0041	0.0488	0.0929	0.1142	0.0997	0.1818		632.7	0.06163	0.01799	0.03908	0.03786	0.02506	0.02354	0.0252										632.7	0.0627618	0.0170912	0.0369903	0.0373097	0.0240706	0.0224035	0.0237876										632.7	1.18948	0.772701	0.995303	0.961155	0.877122	0.780663
634.8	0.1202	-0.0015	0.0417	0.09	0.1174	0.0999	0.1841		634.8	0.0574	0.02059	0.03209	0.03498	0.02829	0.02367	0.02738										634.8	0.0585318	0.0196912	0.0300003	0.0344297	0.0273006	0.0225335	0.0259676										634.8	1.10931	0.890248	0.807223	0.886962	0.994821	0.785193
636.9	0.1251	-0.0024	0.0388	0.0916	0.118	0.1011	0.1822		636.9	0.06237	0.01968	0.02931	0.03661	0.02891	0.02479	0.02536										636.9	0.0635018	0.0187812	0.0272203	0.0360597	0.0279206	0.0236535	0.0239476										636.9	1.2035	0.849107	0.732421	0.928953	1.01741	0.82422
639	0.122	-0.0008	0.0423	0.0895	0.1227	0.1013	0.183		639	0.05934	0.02127	0.03293	0.03454	0.03363	0.02492	0.02603										639	0.0604718	0.0203712	0.0308403	0.0339897	0.0326406	0.0237835	0.0246176										639	1.14608	0.920991	0.829825	0.875627	1.18941	0.82875
641.1	0.1199	-0.0014	0.0442	0.0898	0.1263	0.1051	0.1849		641.1	0.05731	0.02067	0.03494	0.03487	0.03725	0.02864	0.02781										641.1	0.0584418	0.0197712	0.0328503	0.0343197	0.0362606	0.0275035	0.0263976										641.1	1.1076	0.893865	0.883908	0.884128	1.32132	0.958375
643.2	0.1228	-0.0015	0.0488	0.0887	0.1244	0.107	0.1855		643.2	0.06028	0.02056	0.03966	0.0338	0.03537	0.03047	0.02829										643.2	0.0614118	0.0196612	0.0375703	0.0332497	0.0343806	0.0293335	0.0268776										643.2	1.16389	0.888892	1.01091	0.856563	1.25281	1.02214
645.3	0.1227	-0.0009	0.0465	0.0931	0.1258	0.1052	0.1834		645.3	0.06025	0.02115	0.03747	0.03822	0.0368	0.0286	0.02607										645.3	0.0613818	0.0202512	0.0353803	0.0376697	0.0358106	0.0274635	0.0246576										645.3	1.16332	0.915566	0.951983	0.970429	1.30492	0.956982
647.4	0.1244	0.0017	0.045	0.0933	0.1181	0.1026	0.1827		647.4	0.06201	0.02375	0.03609	0.03845	0.02912	0.02592	0.02524										647.4	0.0631418	0.0228512	0.0340003	0.0378997	0.0281306	0.0247835	0.0238276										647.4	1.19668	1.03311	0.914851	0.976354	1.02507	0.863596
649.5	0.1233	-0.0024	0.0442	0.0911	0.1148	0.1027	0.1854		649.5	0.06098	0.01964	0.03541	0.03628	0.02584	0.02595	0.02782										649.5	0.0621118	0.0187412	0.0333203	0.0357297	0.0248506	0.0248135	0.0264076										649.5	1.17716	0.847298	0.896554	0.920452	0.905544	0.864641
651.6	0.1276	-0.0042	0.0415	0.0922	0.1137	0.1005	0.1804		651.6	0.06535	0.01783	0.03282	0.03741	0.02476	0.02367	0.0227										651.6	0.0664818	0.0169312	0.0307303	0.0368597	0.0237706	0.0225335	0.0212876										651.6	1.25998	0.765467	0.826865	0.949562	0.86619	0.785193
653.7	0.1295	-0.0023	0.0412	0.0859	0.1133	0.1016	0.1871		653.7	0.06732	0.01973	0.03264	0.03113	0.02438	0.0247	0.02928										653.7	0.0684518	0.0188312	0.0305503	0.0305797	0.0233906	0.0235635	0.0278676										653.7	1.29731	0.851367	0.822022	0.78778	0.852343	0.821084
655.8	0.1276	0.0006	0.035	0.0876	0.1138	0.1038	0.1842		655.8	0.06549	0.02262	0.02655	0.03286	0.0249	0.02683	0.02625										655.8	0.0666218	0.0217212	0.0244603	0.0323097	0.0239106	0.0256935	0.0248376										655.8	1.26263	0.982025	0.658157	0.832347	0.871291	0.895305
657.9	0.1235	0.0037	0.0356	0.0858	0.1172	0.103	0.1828		657.9	0.06146	0.02571	0.02727	0.03109	0.02833	0.02595	0.02473										657.9	0.0625918	0.0248112	0.0251803	0.0305397	0.0273406	0.0248135	0.0233176										657.9	1.18625	1.12173	0.67753	0.786749	0.996279	0.864641
660	0.1262	0.0059	0.0364	0.0916	0.1195	0.1073	0.185		660	0.06423	0.02791	0.02819	0.03692	0.03065	0.03018	0.02681										660	0.0653618	0.0270112	0.0261003	0.0363697	0.0296606	0.0290435	0.0253976										660	1.23875	1.22119	0.702285	0.936939	1.08082	1.01204
662.1	0.128	0.0012	0.0372	0.09	0.1195	0.1066	0.1814		662.1	0.0661	0.0232	0.0291	0.03535	0.03067	0.0294	0.02309										662.1	0.0672318	0.0223012	0.0270103	0.0347997	0.0296806	0.0282635	0.0216776										662.1	1.27419	1.00825	0.72677	0.896493	1.08155	0.984858
664.2	0.1283	0.0014	0.0356	0.087	0.1188	0.1085	0.1799		664.2	0.06646	0.0234	0.02762	0.03237	0.02999	0.03123	0.02147										664.2	0.0675918	0.0225012	0.0255303	0.0318197	0.0290006	0.0300935	0.0200576										664.2	1.28102	1.01729	0.686948	0.819724	1.05677	1.04863
666.3	0.125	0.0006	0.0377	0.0886	0.1193	0.1047	0.1816		666.3	0.06323	0.02259	0.02983	0.034	0.03051	0.02736	0.02304										666.3	0.0643618	0.0216912	0.0277403	0.0334497	0.0295206	0.0262235	0.0216276										666.3	1.2198	0.980669	0.746413	0.861715	1.07572	0.913773
668.4	0.1238	0.0019	0.0443	0.0902	0.1172	0.1038	0.1843		668.4	0.0621	0.02388	0.03655	0.03563	0.02844	0.02638	0.02562										668.4	0.0632318	0.0229812	0.0344603	0.0350797	0.0274506	0.0252435	0.0242076										668.4	1.19838	1.03899	0.927228	0.903707	1.00029	0.879624
670.5	0.1244	0.0015	0.0449	0.0937	0.1168	0.1044	0.1818		670.5	0.06277	0.02348	0.03727	0.03916	0.02806	0.02691	0.023										670.5	0.0639018	0.0225812	0.0351803	0.0386097	0.0270706	0.0257735	0.0215876										670.5	1.21108	1.02091	0.946602	0.994645	0.98644	0.898093
672.6	0.1238	0.0023	0.0464	0.0907	0.1163	0.1001	0.1827		672.6	0.06224	0.02427	0.03888	0.03618	0.02758	0.02254	0.02378										672.6	0.0633718	0.0233712	0.0367903	0.0356297	0.0265906	0.0214035	0.0223676										672.6	1.20104	1.05662	0.989922	0.917875	0.968949	0.745818
674.7	0.1199	0.0007	0.047	0.0874	0.1179	0.1026	0.1808		674.7	0.05841	0.02266	0.0396	0.03291	0.0292	0.02496	0.02175										674.7	0.0595418	0.0217612	0.0375103	0.0323597	0.0282106	0.0238235	0.0203376										674.7	1.12845	0.983834	1.0093	0.833635	1.02798	0.830144
676.8	0.1202	0.005	0.041	0.0888	0.12	0.105	0.1848		676.8	0.05878	0.02696	0.03372	0.03434	0.03132	0.02729	0.02563										676.8	0.0599118	0.0260612	0.0316303	0.0337897	0.0303306	0.0261535	0.0242176										676.8	1.13546	1.17824	0.851081	0.870474	1.10523	0.911334
678.9	0.1233	0.009	0.0416	0.0913	0.1198	0.104	0.1852		678.9	0.06195	0.03095	0.03443	0.03687	0.03115	0.02621	0.02591										678.9	0.0630818	0.0300512	0.0323403	0.0363197	0.0301606	0.0250735	0.0244976										678.9	1.19554	1.35863	0.870185	0.935651	1.09904	0.873701
681	0.1214	0.0088	0.0395	0.0969	0.1181	0.1058	0.1815		681	0.06011	0.03074	0.03245	0.0425	0.02947	0.02794	0.02209										681	0.0612418	0.0298412	0.0303603	0.0419497	0.0284806	0.0268035	0.0206776										681	1.16067	1.34913	0.816909	1.08069	1.03782	0.933984
683.1	0.125	0.0055	0.0401	0.095	0.1194	0.1095	0.1842		683.1	0.06378	0.02744	0.03316	0.04062	0.03079	0.03157	0.02467										683.1	0.0649118	0.0265412	0.0310703	0.0400697	0.0298006	0.0304335	0.0232576										683.1	1.23022	1.19994	0.836013	1.03226	1.08592	1.06047
685.2	0.1262	0.0003	0.0365	0.0895	0.1187	0.1073	0.1827		685.2	0.06505	0.02223	0.02968	0.03515	0.03011	0.02929	0.02304										685.2	0.0661818	0.0213312	0.0275903	0.0345997	0.0291206	0.0281535	0.0216276										685.2	1.25429	0.964393	0.742377	0.891341	1.06114	0.981025
687.3	0.1222	0	0.0343	0.0912	0.1176	0.1036	0.1857		687.3	0.06112	0.02192	0.0276	0.03688	0.02903	0.02552	0.02592										687.3	0.0622518	0.0210212	0.0255103	0.0363297	0.0280406	0.0243835	0.0245076										687.3	1.17981	0.950378	0.68641	0.935908	1.02179	0.849657
689.4	0.1251	-0.0041	0.0394	0.0883	0.1166	0.1042	0.1904		689.4	0.06409	0.01782	0.03281	0.03401	0.02806	0.02604	0.0305										689.4	0.0652218	0.0169212	0.0307203	0.0334597	0.0270706	0.0249035	0.0290876										689.4	1.2361	0.765015	0.826596	0.861973	0.98644	0.867777
691.5	0.1248	-0.0056	0.04	0.0852	0.117	0.1038	0.1865		691.5	0.06386	0.01631	0.03353	0.03093	0.02848	0.02557	0.02648										691.5	0.0649918	0.0154112	0.0314403	0.0303797	0.0274906	0.0244335	0.0250676										691.5	1.23174	0.696748	0.845969	0.782628	1.00174	0.8514
693.6	0.1257	-0.003	0.0393	0.0841	0.1159	0.1008	0.1882		693.6	0.06483	0.0189	0.03294	0.02986	0.0274	0.0225	0.02805										693.6	0.0659618	0.0180012	0.0308503	0.0293097	0.0264106	0.0213635	0.0266376										693.6	1.25012	0.813843	0.830094	0.755063	0.96239	0.744424
695.7	0.1235	0.003	0.0398	0.0845	0.1143	0.1033	0.1836		695.7	0.0627	0.0249	0.03356	0.03029	0.02582	0.02492	0.02333										695.7	0.0638318	0.0240012	0.0314703	0.0297397	0.0248306	0.0237835	0.0219176										695.7	1.20976	1.08511	0.846776	0.76614	0.904816	0.82875
697.8	0.123	0.0003	0.0345	0.0872	0.1177	0.107	0.1823		697.8	0.06226	0.02219	0.02838	0.03302	0.02924	0.02855	0.02191										697.8	0.0633918	0.0212912	0.0262903	0.0324697	0.0282506	0.0274135	0.0204976										697.8	1.20142	0.962585	0.707397	0.836469	1.02944	0.955239
699.9	0.1251	0.0033	0.0359	0.0916	0.1181	0.1079	0.1857		699.9	0.06443	0.02518	0.02989	0.03745	0.02967	0.02937	0.02519										699.9	0.0655618	0.0242812	0.0278003	0.0368997	0.0286806	0.0282335	0.0237776										699.9	1.24254	1.09776	0.748027	0.950593	1.04511	0.983813
702	0.1226	0.0043	0.0335	0.0898	0.1158	0.1064	0.1841		702	0.062	0.02618	0.02761	0.03567	0.02739	0.0278	0.02346										702	0.0631318	0.0252812	0.0255203	0.0351197	0.0264006	0.0266635	0.0220476										702	1.19649	1.14297	0.686679	0.904737	0.962026	0.929105
704.1	0.1247	0.0029	0.0328	0.088	0.1176	0.1061	0.1838		704.1	0.06417	0.02477	0.02703	0.0339	0.02921	0.02743	0.02304										704.1	0.0653018	0.0238712	0.0249403	0.0333497	0.0282206	0.0262935	0.0216276										704.1	1.23762	1.07923	0.671073	0.859139	1.02835	0.916212
706.2	0.1235	0.0042	0.0328	0.0881	0.1205	0.1031	0.1911		706.2	0.06304	0.02606	0.02714	0.03403	0.03213	0.02435	0.03022										706.2	0.0641718	0.0251612	0.0250503	0.0334797	0.0311406	0.0232135	0.0288076										706.2	1.2162	1.13755	0.674033	0.862488	1.13475	0.808888
708.3	0.1248	0.0079	0.0356	0.0895	0.1195	0.102	0.1904		708.3	0.06441	0.02976	0.03006	0.03546	0.03115	0.02318	0.0294										708.3	0.0655418	0.0288612	0.0279703	0.0349097	0.0301606	0.0220435	0.0279876										708.3	1.24216	1.30483	0.752601	0.899327	1.09904	0.768119
710.4	0.122	0.0071	0.0388	0.0887	0.1193	0.1031	0.1914		710.4	0.06168	0.02895	0.03337	0.03468	0.03098	0.0242	0.03028										710.4	0.0628118	0.0280512	0.0312803	0.0341297	0.0299906	0.0230635	0.0288676										710.4	1.19042	1.26821	0.841664	0.879233	1.09284	0.803661
712.5	0.1208	0.0021	0.039	0.0902	0.1183	0.1038	0.1888		712.5	0.06054	0.02394	0.03369	0.03621	0.03	0.02483	0.02755										712.5	0.0616718	0.0230412	0.0316003	0.0356597	0.0290106	0.0236935	0.0261376										712.5	1.16882	1.0417	0.850274	0.918648	1.05713	0.825614
714.6	0.119	0.0062	0.0401	0.0899	0.1164	0.1068	0.1858		714.6	0.05881	0.02804	0.03491	0.03594	0.02812	0.02776	0.02443										714.6	0.0599418	0.0271412	0.0328203	0.0353897	0.0271306	0.0266235	0.0230176										714.6	1.13603	1.22707	0.883101	0.911693	0.988626	0.927711
716.7	0.1176	0.0051	0.0376	0.0907	0.1148	0.104	0.1859		716.7	0.05748	0.02693	0.03252	0.03677	0.02654	0.02488	0.02441										716.7	0.0586118	0.0260312	0.0304303	0.0362197	0.0255506	0.0237435	0.0229976										716.7	1.11082	1.17688	0.818793	0.933075	0.931052	0.827356
718.8	0.1172	0.0059	0.038	0.0901	0.1172	0.1051	0.1864		718.8	0.05715	0.02772	0.03304	0.0362	0.02896	0.02591	0.02479										718.8	0.0582818	0.0268212	0.0309503	0.0356497	0.0279706	0.0247735	0.0233776										718.8	1.10457	1.2126	0.832785	0.918391	1.01924	0.863247
720.9	0.1193	0.0043	0.0344	0.0909	0.1171	0.1093	0.1872		720.9	0.05932	0.02612	0.02955	0.03702	0.02889	0.03003	0.02546										720.9	0.0604518	0.0252212	0.0274603	0.0364697	0.0279006	0.0288935	0.0240476										720.9	1.1457	1.14026	0.738879	0.939515	1.01668	1.00681
723	0.1241	0.0035	0.036	0.0862	0.1208	0.1098	0.1872		723	0.06419	0.02531	0.03127	0.03235	0.03261	0.03046	0.02534										723	0.0653218	0.0244112	0.0291803	0.0317997	0.0316206	0.0293235	0.0239276										723	1.23799	1.10364	0.785159	0.819209	1.15224	1.02179
725.1	0.1193	0.0037	0.0356	0.0873	0.1166	0.11	0.1892		725.1	0.05946	0.0255	0.03099	0.03348	0.02843	0.03059	0.02722										725.1	0.0605918	0.0246012	0.0289003	0.0329297	0.0274406	0.0294535	0.0258076										725.1	1.14835	1.11223	0.777625	0.848319	0.999923	1.02632
727.2	0.1228	0.0033	0.0355	0.0898	0.1141	0.1051	0.193		727.2	0.06303	0.0251	0.031	0.03601	0.02595	0.02561	0.0309										727.2	0.0641618	0.0242012	0.0289103	0.0354597	0.0249606	0.0244735	0.0294876										727.2	1.21601	1.09415	0.777894	0.913496	0.909553	0.852793
729.3	0.1183	-0.0007	0.0391	0.0934	0.1143	0.1086	0.1887		729.3	0.05859	0.02109	0.03472	0.03963	0.02617	0.02904	0.02648										729.3	0.0597218	0.0201912	0.0326303	0.0390797	0.0251806	0.0279035	0.0250676										729.3	1.13186	0.912853	0.877988	1.00675	0.91757	0.972314
731.4	0.1228	0.0012	0.0407	0.0888	0.1115	0.1122	0.1886		731.4	0.06316	0.02298	0.03643	0.03506	0.0234	0.03256	0.02625										731.4	0.0642918	0.0220812	0.0343403	0.0345097	0.0224106	0.0314235	0.0248376										731.4	1.21847	0.998301	0.924	0.889023	0.816632	1.09497
733.5	0.1244	-0.0009	0.0388	0.0881	0.1142	0.1088	0.1855		733.5	0.06483	0.02088	0.03465	0.03439	0.02612	0.02909	0.02303										733.5	0.0659618	0.0199812	0.0325603	0.0338397	0.0251306	0.0279535	0.0216176										733.5	1.25012	0.903359	0.876105	0.871762	0.915748	0.974056
735.6	0.1229	-0.0013	0.0369	0.085	0.1116	0.1081	0.1841		735.6	0.0634	0.02047	0.03287	0.03132	0.02354	0.02832	0.02151										735.6	0.0645318	0.0195712	0.0307803	0.0307697	0.0225506	0.0271835	0.0200976										735.6	1.22302	0.884823	0.82821	0.792675	0.821734	0.947225
737.7	0.1199	0.0009	0.0315	0.0866	0.1143	0.1066	0.1857		737.7	0.06047	0.02266	0.02758	0.03295	0.02626	0.02674	0.02299										737.7	0.0616018	0.0217612	0.0254903	0.0323997	0.0252706	0.0256035	0.0215776										737.7	1.16749	0.983834	0.685872	0.834666	0.920849	0.892169
739.8	0.1222	-0.0007	0.035	0.0885	0.117	0.1055	0.1858		739.8	0.06284	0.02106	0.0312	0.03487	0.02898	0.02557	0.02296										739.8	0.0639718	0.0201612	0.0291103	0.0343197	0.0279906	0.0244335	0.0215476										739.8	1.21241	0.911497	0.783275	0.884128	1.01996	0.8514
741.9	0.1227	-0.0013	0.031	0.0824	0.1179	0.1092	0.188		741.9	0.06341	0.02045	0.02732	0.0288	0.02991	0.02919	0.02504										741.9	0.0645418	0.0195512	0.0252303	0.0282497	0.0289206	0.0280535	0.0236276										741.9	1.22321	0.883919	0.678876	0.727756	1.05385	0.97754
744	0.1187	-0.0015	0.0334	0.0836	0.1162	0.1074	0.1877		744	0.05948	0.02025	0.02983	0.03003	0.02823	0.02732	0.02462										744	0.0606118	0.0193512	0.0277403	0.0294797	0.0272406	0.0261835	0.0232076										744	1.14873	0.874877	0.746413	0.759442	0.992635	0.912379
746.1	0.1209	0.0015	0.0359	0.0855	0.1173	0.1072	0.1902		746.1	0.06174	0.02324	0.03245	0.03196	0.02935	0.02705	0.027										746.1	0.0628718	0.0223412	0.0303603	0.0314097	0.0283606	0.0259135	0.0255876										746.1	1.19156	1.01006	0.816909	0.809162	1.03345	0.902971
748.2	0.1171	0.0043	0.0362	0.0874	0.1159	0.105	0.1909		748.2	0.05801	0.02603	0.03286	0.03388	0.02797	0.02477	0.02757										748.2	0.0591418	0.0251312	0.0307703	0.0333297	0.0269806	0.0236335	0.0261576										748.2	1.12087	1.13619	0.827941	0.858624	0.983161	0.823523
750.3	0.1155	0.004	0.041	0.089	0.1127	0.1104	0.1841		750.3	0.05648	0.02573	0.03778	0.03551	0.02479	0.0301	0.02065										750.3	0.0576118	0.0248312	0.0356903	0.0349597	0.0238006	0.0289635	0.0192376										750.3	1.09187	1.12263	0.960324	0.900615	0.867283	1.00925
752.4	0.1187	0.0029	0.0429	0.0876	0.1134	0.1081	0.1821		752.4	0.05975	0.02462	0.0398	0.03414	0.02552	0.02773	0.01853										752.4	0.0608818	0.0237212	0.0377103	0.0335897	0.0245306	0.0265935	0.0171176										752.4	1.15385	1.07245	1.01468	0.865322	0.893884	0.926666
754.5	0.1207	0.0045	0.0376	0.0874	0.1155	0.1083	0.1821		754.5	0.06182	0.02621	0.03461	0.03397	0.02764	0.02785	0.01841										754.5	0.0629518	0.0253112	0.0325203	0.0334197	0.0266506	0.0267135	0.0169976										754.5	1.19308	1.14433	0.875029	0.860943	0.971136	0.930847
756.6	0.1155	0.0081	0.0347	0.0907	0.1143	0.1033	0.1828		756.6	0.05669	0.02981	0.03183	0.0373	0.02646	0.02278	0.01899										756.6	0.0578218	0.0289112	0.0297403	0.0367497	0.0254706	0.0216435	0.0175776										756.6	1.09585	1.30709	0.800227	0.946728	0.928137	0.754181
758.7	0.1144	0.0093	0.034	0.0878	0.1128	0.1055	0.1836		758.7	0.05566	0.031	0.03124	0.03442	0.02498	0.0249	0.01966										758.7	0.0567918	0.0301012	0.0291503	0.0338697	0.0239906	0.0237635	0.0182476										758.7	1.07633	1.36089	0.784352	0.872535	0.874207	0.828053
760.8	0.1157	0.0103	0.0307	0.0879	0.1138	0.1094	0.1854		760.8	0.05703	0.03199	0.02806	0.03455	0.026	0.02873	0.02134										760.8	0.0581618	0.0310912	0.0259703	0.0339997	0.0250106	0.0275935	0.0199276										760.8	1.1023	1.40565	0.698787	0.875884	0.911375	0.961512
762.9	0.1176	0.0052	0.0308	0.084	0.1142	0.1101	0.1834		762.9	0.05899	0.02689	0.02828	0.03068	0.02643	0.02936	0.01922										762.9	0.0601218	0.0259912	0.0261903	0.0301297	0.0254406	0.0282235	0.0178076										762.9	1.13944	1.17507	0.704707	0.776187	0.927044	0.983464
765	0.1178	0.0044	0.0326	0.0833	0.1136	0.1093	0.1857		765	0.05926	0.02608	0.03019	0.03001	0.02585	0.02848	0.0214										765	0.0603918	0.0251812	0.0281003	0.0294597	0.0248606	0.0273435	0.0199876										765	1.14456	1.13845	0.756099	0.758927	0.905909	0.9528
767.1	0.1178	0.0035	0.0348	0.0837	0.1098	0.1078	0.1856		767.1	0.05933	0.02517	0.03251	0.03043	0.02207	0.02691	0.02117										767.1	0.0604618	0.0242712	0.0304203	0.0298797	0.0210806	0.0257735	0.0197576										767.1	1.14589	1.09731	0.818524	0.769747	0.768168	0.898093
769.2	0.1161	0.0019	0.033	0.0856	0.109	0.1058	0.1878		769.2	0.0577	0.02357	0.03082	0.03236	0.02129	0.02483	0.02325										769.2	0.0588318	0.0226712	0.0287303	0.0318097	0.0203006	0.0236935	0.0218376										769.2	1.11499	1.02498	0.773051	0.819466	0.739745	0.825614
771.3	0.112	0.0024	0.0288	0.0869	0.1105	0.1059	0.1897		771.3	0.05367	0.02406	0.02674	0.03369	0.02281	0.02486	0.02503										771.3	0.0548018	0.0231612	0.0246503	0.0331397	0.0218206	0.0237235	0.0236176										771.3	1.03862	1.04713	0.66327	0.853729	0.795133	0.826659
773.4	0.1128	0.0037	0.0277	0.0834	0.1136	0.1088	0.1897		773.4	0.05454	0.02535	0.02576	0.03022	0.02594	0.02769	0.02491										773.4	0.0556718	0.0244512	0.0236703	0.0296697	0.0249506	0.0265535	0.0234976										773.4	1.05511	1.10545	0.636901	0.764337	0.909188	0.925272
775.5	0.1143	0.0026	0.0276	0.0845	0.1145	0.1061	0.1885		775.5	0.05611	0.02425	0.02577	0.03134	0.02686	0.02491	0.02358										775.5	0.0572418	0.0233512	0.0236803	0.0307897	0.0258706	0.0237735	0.0221676										775.5	1.08486	1.05572	0.63717	0.79319	0.942713	0.828402
777.6	0.1106	0.004	0.028	0.0828	0.1097	0.1038	0.1894		777.6	0.05248	0.02564	0.02629	0.02967	0.02208	0.02254	0.02436										777.6	0.0536118	0.0247412	0.0242003	0.0291197	0.0210906	0.0214035	0.0229476										777.6	1.01606	1.11856	0.651162	0.750168	0.768532	0.745818
779.7	0.1079	0.0002	0.0241	0.0817	0.1074	0.1044	0.1857		779.7	0.04984	0.02183	0.02251	0.0286	0.0198	0.02306	0.02054										779.7	0.0509718	0.0209312	0.0204203	0.0280497	0.0188106	0.0219235	0.0191276										779.7	0.96603	0.946309	0.549453	0.722603	0.68545	0.763937
781.8	0.1001	-0.008	0.0221	0.073	0.1043	0.0986	0.178		781.8	0.04211	0.01363	0.02062	0.01993	0.01672	0.01719	0.01272										781.8	0.0432418	0.0127312	0.0185303	0.0193797	0.0157306	0.0160535	0.0113076										781.8	0.819529	0.575584	0.498598	0.499251	0.573217	0.559394
783.9	0.0988	-0.0087	0.0215	0.0708	0.1047	0.0958	0.1792		783.9	0.04088	0.01292	0.02014	0.01776	0.01715	0.01432	0.0138										783.9	0.0420118	0.0120212	0.0180503	0.0172097	0.0161606	0.0131835	0.0123876										783.9	0.796217	0.543484	0.485683	0.443348	0.588885	0.459387
786	0.094	-0.0108	0.0206	0.0708	0.1027	0.094	0.1788		786	0.03615	0.01081	0.01935	0.01778	0.01517	0.01244	0.01327										786	0.0372818	0.00991121	0.0172603	0.0172297	0.0141806	0.0113035	0.0118576										786	0.706573	0.44809	0.464426	0.443864	0.516735	0.393878
788.1	0.089	-0.0112	0.0178	0.07	0.1035	0.0954	0.1766		788.1	0.03122	0.01041	0.01667	0.01701	0.01599	0.01377	0.01095										788.1	0.0323518	0.00951121	0.0145803	0.0164597	0.0150006	0.0126335	0.00953758										788.1	0.613139	0.430006	0.392315	0.424027	0.546616	0.440222
790.2	0.0886	-0.0094	0.0187	0.0716	0.1052	0.095	0.1816		790.2	0.03089	0.0122	0.01769	0.01864	0.01771	0.01329	0.01583										790.2	0.0320218	0.0113012	0.0156003	0.0180897	0.0167206	0.0121535	0.0144176										790.2	0.606884	0.510933	0.41976	0.466019	0.609292	0.423496
792.3	0.0886	-0.0097	0.0172	0.0648	0.1069	0.0954	0.1776		792.3	0.03096	0.01189	0.0163	0.01187	0.01943	0.01362	0.01171										792.3	0.0320918	0.0109912	0.0142103	0.0113197	0.0184406	0.0124835	0.0102976										792.3	0.608211	0.496917	0.382359	0.291613	0.671967	0.434995
794.4	0.087	-0.0071	0.0143	0.0629	0.1031	0.0929	0.1785		794.4	0.02943	0.01449	0.01352	0.00999	0.01566	0.01105	0.01248										794.4	0.0305618	0.0135912	0.0114303	0.00943973	0.0146706	0.00991353	0.0110676										794.4	0.579214	0.614465	0.307558	0.243182	0.534591	0.345442
796.5	0.0848	-0.0038	0.0141	0.0637	0.1005	0.0916	0.1733		796.5	0.02729	0.01778	0.01343	0.01082	0.01308	0.00967	0.00716										796.5	0.0284218	0.0168812	0.0113403	0.0102697	0.0120906	0.00853353	0.00574758										796.5	0.538656	0.763207	0.305136	0.264564	0.440577	0.297355
798.6	0.083	0	0.0084	0.0626	0.1005	0.094	0.1743		798.6	0.02556	0.02157	0.00785	0.00975	0.0131	0.012	0.00804										798.6	0.0266918	0.0206712	0.00576035	0.00919973	0.0121106	0.0108635	0.00662758										798.6	0.505869	0.934554	0.154994	0.236999	0.441306	0.378546
800.7	0.0794	-0.007	0.0109	0.0647	0.095	0.0947	0.1736		800.7	0.02203	0.01457	0.01047	0.01188	0.00762	0.01262	0.00722										800.7	0.0231618	0.0136712	0.00838035	0.0113297	0.00663065	0.0114835	0.00580758										800.7	0.438967	0.618081	0.225491	0.291871	0.241617	0.40015
802.8	0.0812	-0.0057	0.0106	0.0605	0.094	0.0958	0.1731		802.8	0.0239	0.01586	0.01028	0.00771	0.00664	0.01365	0.0066										802.8	0.0250318	0.0149612	0.00819035	0.00715973	0.00565065	0.0125135	0.00518758										802.8	0.474408	0.676403	0.220379	0.184445	0.205907	0.436041
804.9	0.0778	-0.0062	0.0074	0.059	0.0958	0.0941	0.1742		804.9	0.02057	0.01535	0.0072	0.00623	0.00847	0.01188	0.00757										804.9	0.0217018	0.0144512	0.00511035	0.00567973	0.00748065	0.0107435	0.00615758										804.9	0.411297	0.653346	0.137505	0.146318	0.272591	0.374364
807	0.0766	-0.0095	0.0052	0.0584	0.0984	0.0915	0.1776		807	0.01944	0.01205	0.00512	0.00566	0.01109	0.0092	0.01085										807	0.0205718	0.0111512	0.00303035	0.00510973	0.0101006	0.00806353	0.00943758										807	0.389881	0.504151	0.0815379	0.131634	0.368062	0.280978
809.1	0.0747	-0.0073	0.0062	0.0597	0.0938	0.0912	0.1761		809.1	0.01761	0.01424	0.00623	0.00699	0.00651	0.00883	0.00923										809.1	0.0187418	0.0133412	0.00414035	0.00643973	0.00552065	0.00769353	0.00781758										809.1	0.355198	0.603162	0.111405	0.165897	0.20117	0.268085
811.2	0.0762	-0.0122	0.004	0.0573	0.0965	0.0901	0.1776		811.2	0.01918	0.00933	0.00415	0.00462	0.00923	0.00765	0.01061										811.2	0.0203118	0.00843121	0.00206035	0.00406973	0.00824065	0.00651353	0.00919758										811.2	0.384953	0.381179	0.055438	0.104842	0.300285	0.226967
813.3	0.0745	-0.0106	0.0074	0.0566	0.0965	0.0936	0.1751		813.3	0.01754	0.01093	0.00766	0.00394	0.00925	0.01108	0.00798										813.3	0.0186718	0.0100312	0.00557035	0.00338973	0.00826065	0.00994353	0.00656758										813.3	0.353872	0.453515	0.149882	0.0873244	0.301014	0.346488
815.4	0.0747	-0.0166	0.0024	0.0573	0.0922	0.0885	0.1686		815.4	0.01781	0.00492	0.00278	0.00467	0.00497	0.00591	0.00136										815.4	0.0189418	0.00402121	0.000690349	0.00411973	0.00398065	0.00477353	-5.24228e-05										815.4	0.358989	0.181801	0.0185753	0.10613	0.145053	0.166336
817.5	0.0752	-0.0172	0.0022	0.0609	0.0897	0.0885	0.1709		817.5	0.01838	0.00432	0.0027	0.0083	0.0025	0.00583	0.00354										817.5	0.0195118	0.00342121	0.000610349	0.00774973	0.00151065	0.00469353	0.00212758										817.5	0.369792	0.154674	0.0164227	0.199645	0.0550473	0.163549
819.6	0.0738	-0.0193	0.0022	0.0584	0.0893	0.0911	0.1714		819.6	0.01705	0.00221	0.00281	0.00583	0.00212	0.00836	0.00392										819.6	0.0181818	0.00131121	0.000720349	0.00527973	0.00113065	0.00722353	0.00250758										819.6	0.344585	0.0592804	0.0193825	0.136014	0.0412003	0.251708
821.7	0.0721	-0.0193	0.0058	0.0579	0.0942	0.0929	0.1708		821.7	0.01542	0.0022	0.00653	0.00536	0.00704	0.01009	0.00319										821.7	0.0165518	0.00130121	0.00444035	0.00480973	0.00605065	0.00895353	0.00177758										821.7	0.313693	0.0588283	0.119477	0.123906	0.220482	0.311991
823.8	0.0748	-0.0193	0.0048	0.0557	0.0977	0.0919	0.1712		823.8	0.01819	0.0022	0.00564	0.00318	0.01056	0.00901	0.00347										823.8	0.0193218	0.00130121	0.00355035	0.00262973	0.00957065	0.00787353	0.00205758										823.8	0.366191	0.0588283	0.0955296	0.0677457	0.348749	0.274357
825.9	0.0719	-0.0162	0.0045	0.058	0.1009	0.0899	0.1758		825.9	0.01536	0.00529	0.00546	0.00551	0.01378	0.00694	0.00795										825.9	0.0164918	0.00439121	0.00337035	0.00495973	0.0127906	0.00580353	0.00653758										825.9	0.312556	0.198529	0.0906864	0.12777	0.466084	0.202227
828	0.0713	-0.0138	0.0076	0.059	0.1029	0.0857	0.1744		828	0.01483	0.00768	0.00868	0.00654	0.01581	0.00266	0.00643										828	0.0159618	0.00678121	0.00659035	0.00598973	0.0148206	0.00152353	0.00501758										828	0.302511	0.306581	0.177327	0.154304	0.540057	0.0530882
830.1	0.0708	-0.0107	0.0081	0.0616	0.1005	0.0871	0.1787		830.1	0.01439	0.01078	0.00929	0.00917	0.01343	0.00399	0.01061										830.1	0.0155218	0.00988121	0.00720035	0.00861973	0.0124406	0.00285353	0.00919758										830.1	0.294172	0.446734	0.193741	0.222057	0.453331	0.0994328
832.2	0.0715	-0.0157	0.0067	0.0609	0.0973	0.0855	0.1763		832.2	0.01516	0.00577	0.00801	0.00849	0.01025	0.00232	0.00808										832.2	0.0162918	0.00487121	0.00592035	0.00793973	0.00926065	0.00118353	0.00666758										832.2	0.308765	0.22023	0.159299	0.204539	0.337453	0.0412407
834.3	0.0707	-0.0159	0.0058	0.0562	0.0973	0.0887	0.1752		834.3	0.01443	0.00556	0.00722	0.00382	0.01027	0.00544	0.00686										834.3	0.0155618	0.00466121	0.00513035	0.00326973	0.00928065	0.00430353	0.00544758										834.3	0.29493	0.210735	0.138043	0.0842331	0.338182	0.149959
836.4	0.0688	-0.0173	0.0002	0.0571	0.0952	0.0885	0.1711		836.4	0.0126	0.00416	0.00174	0.00475	0.00819	0.00517	0.00264										836.4	0.0137318	0.00326121	-0.000349651	0.00419973	0.00720065	0.00403353	0.00122758										836.4	0.260248	0.147441	-0.00940811	0.108191	0.262388	0.140551
838.5	0.0687	-0.0173	0	0.0586	0.0928	0.0871	0.1752		838.5	0.01257	0.00415	0.00166	0.00628	0.00582	0.00369	0.00662										838.5	0.0137018	0.00325121	-0.000429651	0.00572973	0.00483065	0.00255353	0.00520758										838.5	0.259679	0.146989	-0.0115607	0.147606	0.176026	0.0889791
840.6	0.0658	-0.017	0.0035	0.0588	0.0943	0.0908	0.1704		840.6	0.00974	0.00444	0.00527	0.00651	0.00734	0.00732	0.00169										840.6	0.0108718	0.00354121	0.00318035	0.00595973	0.00635065	0.00618353	0.000277577										840.6	0.206044	0.1601	0.085574	0.153532	0.231414	0.215468
842.7	0.0655	-0.0183	0.0029	0.0543	0.0952	0.0867	0.1722		842.7	0.00951	0.00314	0.00479	0.00203	0.00826	0.00315	0.00337										842.7	0.0106418	0.00224121	0.00270035	0.00147973	0.00727065	0.00201353	0.00195758										842.7	0.201685	0.101326	0.0726586	0.03812	0.264939	0.0701625
844.8	0.068	-0.0188	0.0017	0.0555	0.0971	0.0855	0.1766		844.8	0.01208	0.00263	0.00371	0.00326	0.01018	0.00187	0.00765										844.8	0.0132118	0.00173121	0.00162035	0.00270973	0.00919065	0.000733529	0.00623758										844.8	0.250392	0.0782687	0.0435989	0.0698066	0.334902	0.0255602
846.9	0.0637	-0.012	-0.0002	0.0591	0.0964	0.0858	0.1762		846.9	0.00784	0.00942	0.00192	0.00689	0.0095	0.0021	0.00713										846.9	0.00897175	0.00852121	-0.000169651	0.00633973	0.00851065	0.000963529	0.00571758										846.9	0.170035	0.385248	-0.00456483	0.163321	0.310124	0.0335747
849	0.0622	-0.0148	0.0008	0.0613	0.0937	0.0865	0.1761		849	0.00641	0.00662	0.00304	0.00912	0.00683	0.00272	0.0069										849	0.00754175	0.00572121	0.000950349	0.00856973	0.00584065	0.00158353	0.00548758										849	0.142933	0.258658	0.0255711	0.220769	0.21283	0.0551789
851.1	0.0676	-0.0173	-0.0019	0.0615	0.09	0.0874	0.1755		851.1	0.01188	0.00411	0.000453799	0.00934	0.00315	0.00355	0.00618										851.1	0.0130118	0.00321121	-0.00163585	0.00878973	0.00216065	0.00241353	0.00476758										851.1	0.246602	0.14518	-0.0440161	0.226437	0.0787329	0.0841007
853.2	0.0673	-0.0212	-0.0072	0.0577	0.0893	0.0877	0.1763		853.2	0.01165	0.000203269	-0.00473	0.00557	0.00247	0.00378	0.00686										853.2	0.0127818	-0.000695521	-0.00681965	0.00501973	0.00148065	0.00264353	0.00544758										853.2	0.242243	-0.0314448	-0.183497	0.129316	0.0539541	0.0921152
855.3	0.0669	-0.0251	-0.0047	0.0559	0.0908	0.0855	0.1745		855.3	0.01132	-0.0037	-0.00211	0.0038	0.00399	0.0015	0.00494										855.3	0.0124518	-0.00459879	-0.00419965	0.00324973	0.00300065	0.000363529	0.00352758										855.3	0.235989	-0.207913	-0.113	0.0837178	0.109342	0.0126674
857.4	0.0665	-0.0243	-0.0084	0.0569	0.0898	0.0852	0.1744		857.4	0.01099	-0.00291	-0.0057	0.00483	0.00301	0.00113	0.00472										857.4	0.0121218	-0.00380879	-0.00778965	0.00427973	0.00202065	-6.47062e-06	0.00330758										857.4	0.229734	-0.172197	-0.209597	0.110252	0.0736314	-0.000225472
859.5	0.0659	-0.0249	-0.0071	0.0569	0.0891	0.0851	0.1787		859.5	0.01046	-0.00352	-0.00428	0.00486	0.00234	0.000954234	0.00889										859.5	0.0115918	-0.00441879	-0.00636965	0.00430973	0.00135065	-0.000182237	0.00747758										859.5	0.21969	-0.199775	-0.171389	0.111025	0.049217	-0.00635013
861.6	0.0644	-0.0226	-0.0007	0.0544	0.093	0.0865	0.1769		861.6	0.00903	-0.00122	0.00223	0.00238	0.00626	0.00228	0.00697										861.6	0.0101618	-0.00211879	0.000140349	0.00182973	0.00527065	0.00114353	0.00555758										861.6	0.192588	-0.0957914	0.00377638	0.0471365	0.19206	0.0398469
863.7	0.0642	-0.0173	0.0033	0.0544	0.0959	0.0854	0.1727		863.7	0.00889	0.00407	0.00635	0.00241	0.00918	0.00111	0.00265										863.7	0.0100218	0.00317121	0.00426035	0.00185973	0.00819065	-2.64706e-05	0.00123758										863.7	0.189935	0.143372	0.114634	0.0479093	0.298463	-0.000922383
865.8	0.0619	-0.019	0.0034	0.0581	0.0965	0.0874	0.1755		865.8	0.00666	0.00236	0.00657	0.00614	0.0098	0.00303	0.00533										865.8	0.00779175	0.00146121	0.00448035	0.00558973	0.00881065	0.00189353	0.00391758										865.8	0.147671	0.0660619	0.120553	0.144	0.321055	0.0659811
867.9	0.0605	-0.0171	0.0052	0.0574	0.0933	0.0885	0.1751		867.9	0.00533	0.00426	0.00848	0.00547	0.00662	0.00406	0.0048										867.9	0.00646175	0.00336121	0.00639035	0.00491973	0.00563065	0.00292353	0.00338758										867.9	0.122465	0.151962	0.171946	0.12674	0.205178	0.101872
870	0.0595	-0.0183	0.0044	0.0585	0.0885	0.092	0.1748		870	0.0044	0.00305	0.0078	0.00659	0.00185	0.00748	0.00438										870	0.00553175	0.00215121	0.00571035	0.00603973	0.00086065	0.00634353	0.00296758										870	0.104839	0.0972571	0.153649	0.155592	0.0313616	0.221044
872.1	0.0612	-0.0221	0.0026	0.0533	0.0892	0.0909	0.1781		872.1	0.00617	-0.000755918	0.00612	0.00142	0.00257	0.00631	0.00756										872.1	0.00730175	-0.00165471	0.00403035	0.000869726	0.00158065	0.00517353	0.00614758										872.1	0.138385	-0.0748101	0.108445	0.0224054	0.057598	0.180274
874.2	0.0614	-0.0234	-0.0026	0.0544	0.0906	0.0884	0.1788		874.2	0.00644	-0.00206	0.00103	0.00255	0.00399	0.00374	0.00814										874.2	0.00757175	-0.00295879	-0.00105965	0.00199973	0.00300065	0.00260353	0.00672758										874.2	0.143502	-0.133768	-0.0285122	0.051516	0.109342	0.0907214
876.3	0.0609	-0.0194	-0.0023	0.054	0.0943	0.0857	0.1802		876.3	0.00601	0.00193	0.00145	0.00218	0.00771	0.000962702	0.00942										876.3	0.00714175	0.00103121	-0.000639651	0.00162973	0.00672065	-0.000173769	0.00800758										876.3	0.135352	0.0466214	-0.0172112	0.0419842	0.244897	-0.00605506
878.4	0.0597	-0.0169	-0.0013	0.0509	0.0919	0.0859	0.1816		878.4	0.00488	0.00442	0.00256	-0.000894632	0.00533	0.00109	0.01069										878.4	0.00601175	0.00352121	0.000470349	-0.00144491	0.00434065	-4.64706e-05	0.00927758										878.4	0.113936	0.159195	0.0126557	-0.037223	0.158171	-0.00161929
880.5	0.0555	-0.0183	0.0045	0.0534	0.0927	0.0873	0.1806		880.5	0.000744296	0.00302	0.00848	0.00163	0.00616	0.00241	0.00957										880.5	0.00187605	0.00212121	0.00639035	0.00107973	0.00517065	0.00127353	0.00815758										880.5	0.0355553	0.0959008	0.171946	0.0278154	0.188416	0.0443768
882.6	0.0601	-0.0212	0.0044	0.0565	0.0921	0.0821	0.1777		882.6	0.00541	0.000111201	0.0085	0.00476	0.00558	-0.00286	0.00655										882.6	0.00654175	-0.000787589	0.00641035	0.00420973	0.00459065	-0.00399647	0.00513758										882.6	0.123981	-0.0356073	0.172484	0.108449	0.167281	-0.139259
884.7	0.0581	-0.0222	0.0049	0.0565	0.0928	0.0894	0.1764		884.7	0.00348	-0.000895376	0.00911	0.00479	0.0063	0.00437	0.00513										884.7	0.00461175	-0.00179417	0.00702035	0.00423973	0.00531065	0.00323353	0.00371758										884.7	0.0874031	-0.0811151	0.188897	0.109222	0.193517	0.112674
886.8	0.0578	-0.019	0.0037	0.0552	0.0899	0.089	0.1749		886.8	0.00325	0.0023	0.00803	0.00352	0.00342	0.00389	0.0035										886.8	0.00438175	0.00140121	0.00594035	0.00296973	0.00243065	0.00275353	0.00208758										886.8	0.083044	0.0633493	0.159838	0.0765046	0.0885716	0.0959482
888.9	0.0594	-0.0215	0.0009	0.058	0.0861	0.0857	0.1805		888.9	0.00492	-0.000208528	0.00534	0.00634	-0.000356019	0.000519053	0.00898										888.9	0.00605175	-0.00110732	0.00325035	0.00578973	-0.00134537	-0.000617418	0.00756758										888.9	0.114694	-0.0500624	0.0874575	0.149152	-0.0490245	-0.0215143
891	0.0592	-0.024	-0.0048	0.0562	0.0856	0.0848	0.182		891	0.00479	-0.00272	-0.000239835	0.00457	-0.000834046	-0.000454888	0.01036										891	0.00592175	-0.00361879	-0.00232949	0.00401973	-0.0018234	-0.00159136	0.00894758										891	0.112231	-0.163607	-0.0626798	0.103554	-0.0664436	-0.0554518
893.1	0.0584	-0.0294	-0.0072	0.0524	0.0862	0.0897	0.183		893.1	0.00406	-0.00812	-0.00252	0.000799707	-0.000212072	0.00437	0.01124										893.1	0.00519175	-0.00901879	-0.00460965	0.000249433	-0.00120142	0.00323353	0.00982758										893.1	0.0983954	-0.407743	-0.124032	0.00642577	-0.0437792	0.112674
895.2	0.0607	-0.0255	-0.0085	0.0493	0.0855	0.0881	0.1841		895.2	0.00643	-0.00423	-0.00371	-0.00227	-0.000890098	0.0027	0.01221										895.2	0.00756175	-0.00512879	-0.00579965	-0.00282027	-0.00187945	0.00156353	0.0107976										895.2	0.143312	-0.231875	-0.156052	-0.0726545	-0.0684861	0.054482
897.3	0.0594	-0.0259	-0.0107	0.0529	0.0862	0.0841	0.1806		897.3	0.00519	-0.00463	-0.00579	0.00136	-0.000168125	-0.00138	0.00859										897.3	0.00632175	-0.00552879	-0.00787965	0.000809726	-0.00115748	-0.00251647	0.00717758										897.3	0.119811	-0.249959	-0.212019	0.0208598	-0.0421778	-0.0876878
899.4	0.0567	-0.0237	-0.0066	0.0526	0.0855	0.0894	0.1806		899.4	0.00256	-0.00244	-0.00158	0.00108	-0.000846151	0.00385	0.00847										899.4	0.00369175	-0.00333879	-0.00366965	0.000529726	-0.0018355	0.00271353	0.00705758										899.4	0.069967	-0.150948	-0.0987397	0.0136465	-0.0668847	0.0945544
901.5	0.0621	-0.0259	-0.0056	0.0514	0.0897	0.0851	0.1832		901.5	0.00803	-0.00465	-0.000459213	-8.92414e-05	0.00338	-0.000524595	0.01095										901.5	0.00916175	-0.00554879	-0.00254886	-0.000639516	0.00239065	-0.00166107	0.00953758										901.5	0.173636	-0.250863	-0.0685826	-0.0164749	0.087114	-0.0578807
903.6	0.0587	-0.028	-0.0013	0.051	0.0905	0.0872	0.1814		903.6	0.0047	-0.00675	0.00396	-0.000461479	0.0042	0.0015	0.00903										903.6	0.00583175	-0.00764879	0.00187035	-0.00101175	0.00321065	0.000363529	0.00761758										903.6	0.110525	-0.345805	0.0503257	-0.0260643	0.116994	0.0126674
905.7	0.062	-0.03	0.0001	0.054	0.0914	0.0858	0.1816		905.7	0.00807	-0.00876	0.00547	0.00257	0.00512	2.75216e-05	0.0091										905.7	0.00920175	-0.00965879	0.00338035	0.00201973	0.00413065	-0.00110895	0.00768758										905.7	0.174394	-0.436678	0.0909554	0.0520312	0.150519	-0.0386419
907.8	0.0605	-0.0301	0.0024	0.0534	0.0905	0.0879	0.1857		907.8	0.00664	-0.00887	0.00789	0.00199	0.00424	0.00205	0.01308										907.8	0.00777175	-0.00976879	0.00580035	0.00143973	0.00325065	0.000913529	0.0116676										907.8	0.147292	-0.441651	0.156071	0.0370895	0.118452	0.0318324
909.9	0.0558	-0.0284	-0.0012	0.055	0.0905	0.0862	0.1834		909.9	0.00201	-0.00717	0.00441	0.00362	0.00426	0.000279639	0.01066										909.9	0.00314175	-0.00806879	0.00232035	0.00306973	0.00327065	-0.000856832	0.00924758										909.9	0.0595433	-0.364794	0.0624339	0.0790808	0.119181	-0.0298568
912	0.0574	-0.0242	0.0019	0.0529	0.0891	0.0861	0.1855		912	0.00368	-0.00298	0.00762	0.00155	0.00289	0.000105697	0.01264										912	0.00481175	-0.00387879	0.00553035	0.000999726	0.00190065	-0.00103077	0.0112276										912	0.0911935	-0.175362	0.148806	0.0257544	0.0692587	-0.0359179
914.1	0.0569	-0.0266	0.0029	0.0504	0.0895	0.0886	0.1841		914.1	0.00324	-0.00539	0.00874	-0.000922665	0.00331	0.00253	0.01111										914.1	0.00437175	-0.00628879	0.00665035	-0.00147294	0.00232065	0.00139353	0.00969758										914.1	0.0828545	-0.284319	0.178942	-0.0379451	0.0845633	0.0485583
916.2	0.0581	-0.0233	0.0003	0.0534	0.0885	0.0852	0.1807		916.2	0.00451	-0.00209	0.00625	0.00211	0.00233	-0.000942186	0.00759										916.2	0.00564175	-0.00298879	0.00416035	0.00155973	0.00134065	-0.00207866	0.00617758										916.2	0.106924	-0.135125	0.111943	0.0401809	0.0488526	-0.0724319
918.3	0.058	-0.0242	0.0031	0.0576	0.0879	0.0869	0.1797		918.3	0.00448	-0.003	0.00917	0.00633	0.00175	0.000683873	0.00647										918.3	0.00561175	-0.00389879	0.00708035	0.00577973	0.00076065	-0.000452598	0.00505758										918.3	0.106355	-0.176266	0.190512	0.148894	0.0277177	-0.015771
920.4	0.0558	-0.0256	0.0042	0.0566	0.0857	0.087	0.1797		920.4	0.00235	-0.00441	0.01039	0.00536	-0.000426415	0.000709931	0.00635										920.4	0.00348175	-0.00530879	0.00830035	0.00480973	-0.00141577	-0.00042654	0.00493758										920.4	0.065987	-0.240013	0.223338	0.123906	-0.0515897	-0.014863
922.5	0.0549	-0.0276	0.0005	0.0544	0.0893	0.0872	0.1791		922.5	0.00152	-0.00641	0.0068	0.00319	0.0032	0.00083599	0.00562										922.5	0.00265175	-0.00730879	0.00471035	0.00263973	0.00221065	-0.000300481	0.00420758										922.5	0.0502566	-0.330434	0.126742	0.0680033	0.0805549	-0.0104704
924.6	0.0545	-0.0294	-0.002	0.0551	0.0914	0.0885	0.1844		924.6	0.00119	-0.00822	0.00442	0.00392	0.00532	0.00206	0.0108										924.6	0.00232175	-0.00911879	0.00233035	0.00336973	0.00433065	0.000923529	0.00938758										924.6	0.0440024	-0.412265	0.062703	0.0868092	0.157807	0.0321809
926.7	0.0543	-0.0254	-0.0006	0.0584	0.095	0.0858	0.1813		926.7	0.00106	-0.00423	0.00593	0.00724	0.00894	-0.000711893	0.00758										926.7	0.00219175	-0.00512879	0.00384035	0.00668973	0.00795065	-0.00184836	0.00616758										926.7	0.0415386	-0.231875	0.103333	0.172337	0.289717	-0.0644072
928.8	0.0527	-0.024	-0.004	0.0593	0.0943	0.0905	0.1842		928.8	-0.000474656	-0.00283	0.00265	0.00817	0.00826	0.00391	0.01036										928.8	0.000657095	-0.00372879	0.000560349	0.00761973	0.00727065	0.00277353	0.00894758										928.8	0.0124534	-0.16858	0.0150774	0.196296	0.264939	0.0966451
930.9	0.058	-0.0245	-0.0056	0.0566	0.0883	0.0909	0.1837		930.9	0.00489	-0.00334	0.00117	0.0055	0.00228	0.00424	0.00974										930.9	0.00602175	-0.00423879	-0.000919651	0.00494973	0.00129065	0.00310353	0.00832758										930.9	0.114126	-0.191638	-0.0247452	0.127512	0.0470306	0.108144
933	0.0544	-0.025	-0.0074	0.0524	0.0831	0.0888	0.1843		933	0.00136	-0.00385	-0.000517345	0.00133	-0.00289	0.00207	0.01021										933	0.00249175	-0.00474879	-0.002607	0.000779726	-0.00387935	0.000933529	0.00879758										933	0.0472243	-0.214695	-0.0701467	0.0200869	-0.141361	0.0325293
935.1	0.058	-0.0247	-0.0077	0.0509	0.0829	0.0902	0.1851		935.1	0.00503	-0.00355	-0.000701221	-0.000145037	-0.00307	0.00339	0.01089										935.1	0.00616175	-0.00444879	-0.00279087	-0.000695311	-0.00405935	0.00225353	0.00947758										935.1	0.116779	-0.201132	-0.0750943	-0.0179123	-0.147921	0.0785255
937.2	0.0558	-0.0215	-0.0097	0.0536	0.0811	0.0886	0.1842		937.2	0.0029	-0.000359784	-0.00259	0.00258	-0.00485	0.00172	0.00987										937.2	0.00403175	-0.00125857	-0.00467965	0.00202973	-0.00583935	0.000583529	0.00845758										937.2	0.0764108	-0.0569007	-0.125916	0.0522888	-0.212783	0.0203334
939.3	0.0534	-0.0263	-0.0102	0.0547	0.0791	0.0885	0.1822		939.3	0.00056905	-0.00517	-0.00297	0.00371	-0.00683	0.00154	0.00775										939.3	0.0017008	-0.00606879	-0.00505965	0.00315973	-0.00781935	0.000403529	0.00633758										939.3	0.032234	-0.274373	-0.136141	0.0813993	-0.284933	0.0140612
941.4	0.0571	-0.0287	-0.0078	0.0526	0.0849	0.0871	0.184		941.4	0.00434	-0.00757	-0.000452847	0.00164	-0.00101	7.05165e-05	0.00942										941.4	0.00547175	-0.00846879	-0.0025425	0.00108973	-0.00199935	-0.00106595	0.00800758										941.4	0.103702	-0.382878	-0.0684113	0.028073	-0.0728553	-0.0371438
943.5	0.0563	-0.0293	-0.0063	0.0528	0.0876	0.088	0.1847		943.5	0.00361	-0.00818	0.00116	0.00187	0.00172	0.000896575	0.01										943.5	0.00474175	-0.00907879	-0.000929651	0.00131973	0.00073065	-0.000239896	0.00858758										943.5	0.0898669	-0.410456	-0.0250142	0.0339981	0.0266245	-0.00835929
945.6	0.0549	-0.0274	-0.0113	0.0531	0.0954	0.0899	0.1861		945.6	0.00228	-0.00629	-0.00372	0.00219	0.00954	0.00272	0.01128										945.6	0.00341175	-0.00718879	-0.00580965	0.00163973	0.00855065	0.00158353	0.00986758										945.6	0.0646604	-0.325008	-0.156321	0.0422418	0.311581	0.0551789
947.7	0.0548	-0.0252	-0.0077	0.0547	0.0928	0.088	0.1875		947.7	0.00224	-0.00409	-4.47388e-06	0.00382	0.00696	0.000748692	0.01256										947.7	0.00337175	-0.00498879	-0.00209413	0.00326973	0.00597065	-0.000387779	0.0111476										947.7	0.0639023	-0.225545	-0.0563469	0.0842331	0.217567	-0.0135124
949.8	0.0551	-0.0279	-0.0079	0.0545	0.0886	0.0879	0.1851		949.8	0.00261	-0.0068	-8.83494e-05	0.00365	0.00278	0.000574751	0.01004										949.8	0.00374175	-0.00769879	-0.002178	0.00309973	0.00179065	-0.00056172	0.00862758										949.8	0.0709146	-0.348066	-0.0586037	0.0798536	0.0652503	-0.0195734
951.9	0.0547	-0.0264	-0.0038	0.0504	0.0904	0.0904	0.1866		951.9	0.00228	-0.00531	0.00413	-0.000422934	0.0046	0.003	0.01141										951.9	0.00341175	-0.00620879	0.00204035	-0.000973208	0.00361065	0.00186353	0.00999758										951.9	0.0646604	-0.280702	0.0548999	-0.0250713	0.13157	0.0649357
954	0.0531	-0.026	-0.0033	0.0509	0.0864	0.0913	0.1826		954	0.000750239	-0.00491	0.00474	0.000104829	0.000625163	0.00383	0.00729										954	0.00188199	-0.00580879	0.00265035	-0.000445445	-0.000364187	0.00269353	0.00587758										954	0.0356679	-0.262618	0.0713132	-0.0114753	-0.0132708	0.0938575
956.1	0.0521	-0.024	-0.005	0.0497	0.0821	0.0856	0.1845		956.1	-0.00018102	-0.00292	0.00316	-0.00107	-0.00365	-0.00195	0.00907										956.1	0.000950731	-0.00381879	0.00107035	-0.00162027	-0.00463935	-0.00308647	0.00765758										956.1	0.0180185	-0.172649	0.0288	-0.0417407	-0.169055	-0.10755
958.2	0.0467	-0.0216	-0.0043	0.0521	0.0869	0.0862	0.1862		958.2	-0.00551	-0.000525547	0.00398	0.00136	0.00117	-0.00142	0.01065										958.2	-0.00437825	-0.00142434	0.00189035	0.000809726	0.00018065	-0.00255647	0.00923758										958.2	-0.0829777	-0.0643949	0.0508638	0.0208598	0.00658279	-0.0890816
960.3	0.049	-0.0215	-0.0042	0.052	0.0885	0.0878	0.1852		960.3	-0.00314	-0.000432124	0.00419	0.00129	0.00279	0.000105043	0.00952										960.3	-0.00200825	-0.00133091	0.00210035	0.000739726	0.00180065	-0.00103143	0.00810758										960.3	-0.0380609	-0.0601712	0.0565143	0.0190565	0.0656147	-0.0359407
962.4	0.0457	-0.0227	-0.0092	0.0504	0.0893	0.0869	0.1836		962.4	-0.00637	-0.00164	-0.000691602	-0.00028412	0.00361	-0.000868898	0.0078										962.4	-0.00523825	-0.00253879	-0.00278125	-0.000834394	0.00262065	-0.00200537	0.00638758										962.4	-0.0992766	-0.11478	-0.0748355	-0.0214953	0.0954951	-0.0698782
964.5	0.0449	-0.024	-0.0065	0.0521	0.0937	0.0892	0.1862		964.5	-0.00711	-0.00295	0.00212	0.00144	0.00804	0.00136	0.01028										964.5	-0.00597825	-0.00384879	3.03486e-05	0.000889726	0.00705065	0.000223529	0.00886758										964.5	-0.113301	-0.174006	0.000816593	0.0229207	0.256922	0.007789
966.6	0.0466	-0.0233	-0.0073	0.0517	0.0927	0.0886	0.1861		966.6	-0.00534	-0.00225	0.00144	0.00107	0.00706	0.000683219	0.01006										966.6	-0.00420825	-0.00314879	-0.000649651	0.000519726	0.00607065	-0.000453252	0.00864758										966.6	-0.0797558	-0.142358	-0.0174802	0.0133889	0.221211	-0.0157938
968.7	0.0455	-0.0204	-0.007	0.0556	0.0852	0.0907	0.1832		968.7	-0.00637	0.000641571	0.00186	0.005	-0.000421022	0.00271	0.00703										968.7	-0.00523825	-0.000257219	-0.000229651	0.00444973	-0.00141037	0.00157353	0.00561758										968.7	-0.0992766	-0.011629	-0.00617926	0.114632	-0.0513932	0.0548305
970.8	0.0492	-0.0271	-0.0086	0.0541	0.0834	0.0899	0.1879		970.8	-0.0026	-0.00607	0.000372896	0.00353	-0.0022	0.00184	0.01161										970.8	-0.00146825	-0.00696879	-0.00171676	0.00297973	-0.00318935	0.000703529	0.0101976										970.8	-0.0278266	-0.315062	-0.0461929	0.0767622	-0.116218	0.0245149
972.9	0.0521	-0.0283	-0.0103	0.0533	0.08	0.0901	0.1869		972.9	0.00036891	-0.00727	-0.00121	0.00275	-0.00558	0.00196	0.01049										972.9	0.00150066	-0.00816879	-0.00329965	0.00219973	-0.00656935	0.000823529	0.00907758										972.9	0.0284409	-0.369315	-0.0887841	0.0566683	-0.239384	0.0286963
975	0.0517	-0.0256	-0.0114	0.0478	0.0833	0.0898	0.1863		975	3.7651e-05	-0.00458	-0.00219	-0.00272	-0.00226	0.00159	0.00977										975	0.0011694	-0.00547879	-0.00427965	-0.00327027	-0.00324935	0.000453529	0.00835758										975	0.0221628	-0.247699	-0.115153	-0.0842472	-0.118405	0.0158035
977.1	0.0481	-0.0234	-0.0147	0.0506	0.0834	0.0833	0.1885		977.1	-0.00349	-0.00238	-0.00538	0.00011022	-0.00213	-0.00499	0.01185										977.1	-0.00235825	-0.00327879	-0.00746965	-0.000440054	-0.00311935	-0.00612647	0.0104376										977.1	-0.0446941	-0.148236	-0.200987	-0.0113365	-0.113667	-0.21348
979.2	0.0506	-0.0259	-0.0153	0.0517	0.0878	0.0852	0.1909		979.2	-0.000924867	-0.00489	-0.00586	0.00124	0.00229	-0.00316	0.01412										979.2	0.000206884	-0.00578879	-0.00794965	0.000689726	0.00130065	-0.00429647	0.0127076										979.2	0.00392091	-0.261714	-0.213902	0.0177684	0.047395	-0.149713
981.3	0.0542	-0.0255	-0.0141	0.0523	0.0855	0.0891	0.1871		981.3	0.00274	-0.0045	-0.00455	0.00187	1.08195e-05	0.000665628	0.0102										981.3	0.00387175	-0.00539879	-0.00663965	0.00131973	-0.000978531	-0.000470843	0.00878758										981.3	0.0733784	-0.244082	-0.178654	0.0339981	-0.0356571	-0.0164068
983.4	0.0529	-0.0281	-0.0127	0.0504	0.0871	0.0885	0.1871		983.4	0.00151	-0.0071	-0.00303	-6.49202e-06	0.00163	-8.31302e-06	0.01008										983.4	0.00264175	-0.00799879	-0.00511965	-0.000556766	0.00064065	-0.00114478	0.00866758										983.4	0.0500671	-0.361629	-0.137755	-0.0143431	0.0233449	-0.0398906
985.5	0.0501	-0.0301	-0.0123	0.0514	0.0877	0.0895	0.1854		985.5	-0.00122	-0.00911	-0.00251	0.00102	0.00225	0.000917746	0.00826										985.5	-8.82494e-05	-0.0100088	-0.00459965	0.000469726	0.00126065	-0.000218725	0.00684758										985.5	-0.00167252	-0.452502	-0.123763	0.0121008	0.0459374	-0.00762158
987.6	0.0498	-0.0323	-0.0094	0.0494	0.0856	0.0917	0.1849		987.6	-0.00145	-0.01132	0.000501892	-0.000950966	0.00017674	0.00304	0.00763										987.6	-0.000318249	-0.0122188	-0.00158776	-0.00150124	-0.00081261	0.00190353	0.00621758										987.6	-0.00603154	-0.552417	-0.042722	-0.0386742	-0.0296111	0.0663295
989.7	0.0512	-0.0307	-0.0091	0.0557	0.0813	0.0905	0.185		989.7	1.88394e-05	-0.00972	0.000918016	0.00538	-0.0041	0.00177	0.00761										989.7	0.00115059	-0.0106188	-0.00117164	0.00482973	-0.00508935	0.000633529	0.00619758										989.7	0.0218063	-0.48008	-0.0315253	0.124421	-0.185453	0.0220757
991.8	0.0531	-0.0294	-0.0051	0.0522	0.0834	0.0886	0.1841		991.8	0.00199	-0.00843	0.00503	0.0019	-0.00198	-0.000204079	0.00659										991.8	0.00312175	-0.00932879	0.00294035	0.00134973	-0.00296935	-0.00134055	0.00517758										991.8	0.0591642	-0.421759	0.0791163	0.034771	-0.108202	-0.0467122
993.9	0.0495	-0.0302	-0.0027	0.0493	0.0836	0.0866	0.1871		993.9	-0.00154	-0.00924	0.00755	-0.000967678	-0.00176	-0.00228	0.00947										993.9	-0.000408249	-0.0101388	0.00546035	-0.00151795	-0.00274935	-0.00341647	0.00805758										993.9	-0.00773725	-0.458379	0.146922	-0.0391047	-0.100185	-0.119049
996	0.0471	-0.0237	-0.0031	0.0507	0.0872	0.0837	0.1878		996	-0.00387	-0.00274	0.00727	0.000460085	0.00186	-0.00525	0.01005										996	-0.00273825	-0.00363879	0.00518035	-9.01892e-05	0.00087065	-0.00638647	0.00863758										996	-0.051896	-0.164511	0.139388	-0.00232341	0.031726	-0.22254
998.1	0.0471	-0.0186	-0.003	0.0505	0.0907	0.0856	0.1852		998.1	-0.00381	0.00235	0.00748	0.000287848	0.00539	-0.00343	0.00732										998.1	-0.00267825	0.00145121	0.00539035	-0.000262426	0.00440065	-0.00456647	0.00590758										998.1	-0.0507589	0.0656098	0.145039	-0.00676049	0.160357	-0.159121
1000.2	0.0444	-0.0194	-0.0033	0.0534	0.0898	0.0908	0.1879		1000.2	-0.00644	0.00154	0.0073	0.00322	0.00451	0.0017	0.0099										1000.2	-0.00530825	0.00064121	0.00521035	0.00266973	0.00352065	0.000563529	0.00848758										1000.2	-0.100603	0.0289894	0.140195	0.0687762	0.128291	0.0196365
1002.3	0.0463	-0.0185	-0.003	0.0526	0.0859	0.0887	0.1857		1002.3	-0.00447	0.00244	0.00771	0.00244	0.000630556	-0.000473786	0.00758										1002.3	-0.00333825	0.00154121	0.00562035	0.00188973	-0.000358794	-0.00161026	0.00616758										1002.3	-0.0632673	0.0696788	0.151227	0.0486822	-0.0130743	-0.0561103
1004.4	0.0438	-0.0224	-0.0083	0.0501	0.0869	0.0907	0.1843		1004.4	-0.0069	-0.00147	0.00253	-2.8864e-05	0.00165	0.00145	0.00606										1004.4	-0.00576825	-0.00236879	0.000440349	-0.000579138	0.00066065	0.000313529	0.00464758										1004.4	-0.109321	-0.107094	0.0118485	-0.0149195	0.0240737	0.0109251
1006.5	0.0452	-0.0241	-0.0124	0.0504	0.0823	0.0901	0.1844		1006.5	-0.00543	-0.00318	-0.00145	0.000298899	-0.00293	0.000778331	0.00603										1006.5	-0.00429825	-0.00407879	-0.00353965	-0.000251375	-0.00391935	-0.00035814	0.00461758										1006.5	-0.0814615	-0.184404	-0.0952418	-0.0064758	-0.142819	-0.0124796
1008.6	0.0444	-0.027	-0.0166	0.0567	0.0833	0.0922	0.1854		1008.6	-0.00616	-0.00608	-0.00554	0.00663	-0.0019	0.0028	0.00691										1008.6	-0.00502825	-0.00697879	-0.00762965	0.00607973	-0.00288935	0.00166353	0.00549758										1008.6	-0.0952967	-0.315514	-0.205292	0.156623	-0.105286	0.0579666
1010.7	0.0454	-0.0285	-0.0138	0.0549	0.08	0.0904	0.1883		1010.7	-0.00509	-0.00759	-0.00262	0.00485	-0.00518	0.000930448	0.00969										1010.7	-0.00395825	-0.00848879	-0.00470965	0.00429973	-0.00616935	-0.000206023	0.00827758										1010.7	-0.0750177	-0.383782	-0.126723	0.110767	-0.224808	-0.00717897
1012.8	0.0452	-0.0293	-0.0133	0.0497	0.0788	0.0938	0.1933		1012.8	-0.00523	-0.0084	-0.002	-0.000317813	-0.00636	0.00426	0.01457										1012.8	-0.00409825	-0.00929879	-0.00408965	-0.000868087	-0.00734935	0.00312353	0.0131576										1012.8	-0.0776711	-0.420402	-0.110041	-0.0223632	-0.267806	0.108841
1014.9	0.0481	-0.0271	-0.0135	0.0494	0.0807	0.0926	0.194		1014.9	-0.00226	-0.0062	-0.00209	-0.00059005	-0.00444	0.00298	0.01514										1014.9	-0.00112825	-0.00709879	-0.00417965	-0.00114032	-0.00542935	0.00184353	0.0137276										1014.9	-0.0213829	-0.320939	-0.112462	-0.0293765	-0.197843	0.0642388
1017	0.0469	-0.0247	-0.0149	0.051	0.0838	0.09	0.1923		1017	-0.00339	-0.00381	-0.00337	0.00104	-0.00132	0.000308623	0.01332										1017	-0.00225825	-0.00470879	-0.00545965	0.000489726	-0.00230935	-0.000827848	0.0119076										1017	-0.0427989	-0.212886	-0.146903	0.0126161	-0.0841515	-0.0288468
1019.1	0.0436	-0.0267	-0.0159	0.0558	0.0815	0.0906	0.1892		1019.1	-0.00662	-0.00582	-0.00426	0.00587	-0.00359	0.000834682	0.0101										1019.1	-0.00548825	-0.00671879	-0.00634965	0.00531973	-0.00457935	-0.000301789	0.00868758										1019.1	-0.104015	-0.303759	-0.170851	0.137044	-0.166869	-0.010516
1021.2	0.0494	-0.0297	-0.0148	0.0555	0.0773	0.0906	0.1913		1021.2	-0.000750042	-0.00882	-0.00304	0.00559	-0.00777	0.00076074	0.01208										1021.2	0.000381709	-0.00971879	-0.00512965	0.00503973	-0.00875935	-0.000375731	0.0106676										1021.2	0.00723424	-0.439391	-0.138024	0.129831	-0.319186	-0.0130925
1023.3	0.0497	-0.0317	-0.0198	0.0522	0.0805	0.0965	0.1913		1023.3	-0.000381301	-0.01083	-0.00792	0.00232	-0.00455	0.00659	0.01196										1023.3	0.00075045	-0.0117288	-0.0100097	0.00176973	-0.00553935	0.00545353	0.0105476										1023.3	0.0142227	-0.530264	-0.269331	0.0455908	-0.201851	0.190031
1025.4	0.0487	-0.0334	-0.0191	0.0497	0.0819	0.0954	0.1892		1025.4	-0.00131	-0.01254	-0.00711	-0.000151236	-0.00313	0.00541	0.00973										1025.4	-0.000178249	-0.0134388	-0.00919965	-0.00070151	-0.00411935	0.00427353	0.00831758										1025.4	-0.00337823	-0.607574	-0.247536	-0.018072	-0.150107	0.148913
1027.5	0.0476	-0.0319	-0.0156	0.05	0.0862	0.0934	0.1882		1027.5	-0.00234	-0.01104	-0.00349	0.000176527	0.00119	0.00334	0.00861										1027.5	-0.00120825	-0.0119388	-0.00557965	-0.000373747	0.00020065	0.00220353	0.00719758										1027.5	-0.022899	-0.539758	-0.150132	-0.00962829	0.00731158	0.0767832
1029.6	0.0473	-0.029	-0.0137	0.0519	0.0848	0.0921	0.1898		1029.6	-0.00258	-0.00815	-0.00148	0.0021	-0.000183788	0.00196	0.01009										1029.6	-0.00144825	-0.00904879	-0.00356965	0.00154973	-0.00117314	0.000823529	0.00867758										1029.6	-0.0274476	-0.4091	-0.096049	0.0399233	-0.0427485	0.0286963
1031.7	0.0523	-0.0278	-0.0085	0.0492	0.0907	0.0898	0.1908		1031.7	0.00249	-0.00696	0.00384	-0.000567947	0.00574	-0.000408967	0.01097										1031.7	0.00362175	-0.00785879	0.00175035	-0.00111822	0.00475065	-0.00154544	0.00955758										1031.7	0.0686403	-0.355299	0.0470968	-0.0288071	0.173111	-0.0538516
1033.8	0.0465	-0.0259	-0.0066	0.0517	0.0883	0.0904	0.1952		1033.8	-0.00324	-0.00506	0.00586	0.00196	0.00336	0.000117092	0.01524										1033.8	-0.00210825	-0.00595879	0.00377035	0.00140973	0.00237065	-0.00101938	0.0138276										1033.8	-0.0399561	-0.2694	0.101449	0.0363167	0.0863852	-0.0355208
1035.9	0.046	-0.0237	-0.0072	0.051	0.0873	0.0862	0.1914		1035.9	-0.00367	-0.00287	0.00537	0.00129	0.00238	-0.00416	0.01132										1035.9	-0.00253825	-0.00376879	0.00328035	0.000739726	0.00139065	-0.00529647	0.00990758										1035.9	-0.0481055	-0.170389	0.0882647	0.0190565	0.0506745	-0.184558
1038	0.0459	-0.0235	-0.0056	0.0538	0.0866	0.0877	0.1902		1038	-0.0037	-0.00268	0.00709	0.00412	0.0017	-0.00273	0.01										1038	-0.00256825	-0.00357879	0.00500035	0.00356973	0.00071065	-0.00386647	0.00858758										1038	-0.0486741	-0.161799	0.134545	0.0919615	0.0258957	-0.134729
1040.1	0.0459	-0.0265	-0.0107	0.0515	0.0834	0.0883	0.1885		1040.1	-0.00363	-0.00568	0.00211	0.00184	-0.00147	-0.0022	0.00818										1040.1	-0.00249825	-0.00657879	2.03486e-05	0.00128973	-0.00245935	-0.00333647	0.00676758										1040.1	-0.0473475	-0.29743	0.000547522	0.0332253	-0.0896174	-0.116261
1042.2	0.0462	-0.0308	-0.0101	0.0528	0.0836	0.0892	0.1872		1042.2	-0.00326	-0.00999	0.00282	0.00317	-0.00125	-0.00138	0.00675										1042.2	-0.00212825	-0.0108888	0.000730349	0.00261973	-0.00223935	-0.00251647	0.00533758										1042.2	-0.0403351	-0.492287	0.0196516	0.0674881	-0.0816007	-0.0876878
1044.3	0.0472	-0.0277	-0.0134	0.0509	0.0863	0.0885	0.1899		1044.3	-0.00219	-0.0069	-0.000362747	0.0013	0.00147	-0.00215	0.00933										1044.3	-0.00105825	-0.00779879	-0.0024524	0.000749726	0.00048065	-0.00328647	0.00791758										1044.3	-0.0200562	-0.352587	-0.065987	0.0193141	0.0175146	-0.114519
1046.4	0.0479	-0.0274	-0.0088	0.049	0.0864	0.0887	0.193		1046.4	-0.00143	-0.0066	0.00435	-0.000573608	0.00159	-0.00203	0.01231										1046.4	-0.000298249	-0.00749879	0.00226035	-0.00112388	0.00060065	-0.00316647	0.0108976										1046.4	-0.0056525	-0.339024	0.0608195	-0.0289529	0.0218874	-0.110337
1048.5	0.0424	-0.0251	-0.0087	0.0517	0.0836	0.0888	0.1952		1048.5	-0.00686	-0.00431	0.00457	0.00215	-0.00119	-0.002	0.01439										1048.5	-0.00572825	-0.00520879	0.00248035	0.00159973	-0.00217935	-0.00313647	0.0129776										1048.5	-0.108563	-0.235492	0.066739	0.0412113	-0.0794144	-0.109292
1050.6	0.0433	-0.0263	-0.007	0.0513	0.0834	0.0904	0.1943		1050.6	-0.00589	-0.00551	0.00639	0.00178	-0.00136	-0.00047444	0.01337										1050.6	-0.00475825	-0.00640879	0.00430035	0.00122973	-0.00234935	-0.00161091	0.0119576										1050.6	-0.0901795	-0.289744	0.11571	0.0316796	-0.0856091	-0.0561331
1052.7	0.0447	-0.0242	-0.0083	0.053	0.0819	0.0927	0.1934		1052.7	-0.00442	-0.00342	0.0052	0.00351	-0.00284	0.00175	0.01234										1052.7	-0.00328825	-0.00431879	0.00311035	0.00295973	-0.00382935	0.000613529	0.0109276										1052.7	-0.0623197	-0.195254	0.0836905	0.076247	-0.139539	0.0213788
1054.8	0.0466	-0.0231	-0.0147	0.0537	0.0826	0.0908	0.1918		1054.8	-0.00245	-0.00233	-0.00108	0.00424	-0.00212	-0.000222323	0.01062										1054.8	-0.00131825	-0.00322879	-0.00316965	0.00368973	-0.00310935	-0.00135879	0.00920758										1054.8	-0.0249838	-0.145975	-0.0852862	0.0950529	-0.113303	-0.0473479
1056.9	0.0449	-0.0198	-0.0179	0.0542	0.0797	0.0872	0.1952		1056.9	-0.00408	0.000965365	-0.00417	0.00477	-0.005	-0.0039	0.0139										1056.9	-0.00294825	6.65746e-05	-0.00625965	0.00421973	-0.00598935	-0.00503647	0.0124876										1056.9	-0.055876	0.00300987	-0.168429	0.108706	-0.218249	-0.175499
1059	0.0456	-0.0197	-0.0222	0.0584	0.078	0.0878	0.1944		1059	-0.00331	0.00106	-0.00835	0.00899	-0.00668	-0.00337	0.01298										1059	-0.00217825	0.00016121	-0.0104397	0.00843973	-0.00766935	-0.00450647	0.0115676										1059	-0.0412827	0.00728836	-0.280901	0.21742	-0.279467	-0.15703
1061.1	0.0469	-0.0238	-0.024	0.0566	0.0777	0.0923	0.1951		1061.1	-0.00194	-0.00305	-0.01003	0.00722	-0.00695	0.00106	0.01355										1061.1	-0.000808249	-0.00394879	-0.0121197	0.00666973	-0.00793935	-7.64706e-05	0.0121376										1061.1	-0.0153181	-0.178527	-0.326105	0.171822	-0.289306	-0.00266466
1063.2	0.0488	-0.0247	-0.026	0.0531	0.0835	0.0898	0.1948		1063.2	2.47818e-05	-0.00395	-0.01192	0.00375	-0.00113	-0.00152	0.01313										1063.2	0.00115653	-0.00484879	-0.0140097	0.00319973	-0.00211935	-0.00265647	0.0117176										1063.2	0.0219189	-0.219216	-0.376959	0.0824298	-0.077228	-0.0925662
1065.3	0.0457	-0.0249	-0.0264	0.0509	0.085	0.0902	0.1956		1065.3	-0.00301	-0.00416	-0.0122	0.00158	0.000389764	-0.00119	0.01381										1065.3	-0.00187825	-0.00505879	-0.0142897	0.00102973	-0.000599586	-0.00232647	0.0123976										1065.3	-0.0355971	-0.22871	-0.384493	0.0265273	-0.0218486	-0.0810671
1067.4	0.0454	-0.0264	-0.0215	0.055	0.0861	0.0892	0.1957		1067.4	-0.00324	-0.00567	-0.00719	0.0057	0.00151	-0.00227	0.01379										1067.4	-0.00210825	-0.00656879	-0.00927965	0.00514973	0.00052065	-0.00340647	0.0123776										1067.4	-0.0399561	-0.296978	-0.249689	0.132665	0.0189722	-0.1187
1069.5	0.0463	-0.0254	-0.0144	0.0549	0.0857	0.0921	0.1933		1069.5	-0.00227	-0.00467	3.0747e-05	0.00563	0.00113	0.000560086	0.01127										1069.5	-0.00113825	-0.00556879	-0.0020589	0.00507973	0.00014065	-0.000576385	0.00985758										1069.5	-0.0215724	-0.251767	-0.0553992	0.130861	0.00512521	-0.0200844
1071.6	0.0495	-0.0243	-0.0098	0.052	0.0833	0.0915	0.1906		1071.6	0.000999747	-0.00358	0.00475	0.00276	-0.00124	-0.000113855	0.00844										1071.6	0.0021315	-0.00447879	0.00266035	0.00220973	-0.00222935	-0.00125033	0.00702758										1071.6	0.0403967	-0.202488	0.0715823	0.0569259	-0.0812363	-0.0435683
1073.7	0.0478	-0.0247	-0.007	0.053	0.0851	0.0915	0.1897		1073.7	-0.000631512	-0.00399	0.00766	0.00379	0.000577658	-0.000187797	0.00742										1073.7	0.000500239	-0.00488879	0.00557035	0.00323973	-0.000411692	-0.00132427	0.00600758										1073.7	0.00948065	-0.221024	0.149882	0.0834602	-0.0150018	-0.0461448
1075.8	0.0472	-0.0264	-0.0034	0.0551	0.0869	0.0909	0.1932		1075.8	-0.00116	-0.00569	0.01138	0.00592	0.0024	-0.000861738	0.0108										1075.8	-2.82494e-05	-0.00658879	0.00929035	0.00536973	0.00141065	-0.00199821	0.00938758										1075.8	-0.00053539	-0.297882	0.249976	0.138332	0.0514033	-0.0696287
1077.9	0.0467	-0.0212	-0.0069	0.0535	0.0854	0.0901	0.1941		1077.9	-0.00159	-0.000500398	0.008	0.00434	0.000921605	-0.00174	0.01158										1077.9	-0.000458249	-0.00139919	0.00591035	0.00378973	-6.77451e-05	-0.00287647	0.0101676										1077.9	-0.00868486	-0.0632579	0.15903	0.097629	-0.00246859	-0.100232
1080	0.0484	-0.0258	-0.007	0.0535	0.088	0.0919	0.1949		1080	0.000174712	-0.00511	0.00801	0.00437	0.00354	-9.62094e-06	0.01225										1080	0.00130646	-0.00600879	0.00592035	0.00381973	0.00255065	-0.00114609	0.0108376										1080	0.0247604	-0.27166	0.159299	0.0984019	0.0929443	-0.0399362
1082.1	0.0457	-0.0219	-0.01	0.0522	0.0888	0.0929	0.197		1082.1	-0.00246	-0.00121	0.00513	0.0031	0.00437	0.000916438	0.01423										1082.1	-0.00132825	-0.00210879	0.00304035	0.00254973	0.00338065	-0.000220033	0.0128176										1082.1	-0.0251733	-0.0953393	0.081807	0.0656848	0.123189	-0.00766716
1084.2	0.0459	-0.0208	-0.0095	0.0467	0.0934	0.0874	0.1925		1084.2	-0.00219	-0.000120127	0.00574	-0.00237	0.00899	-0.00466	0.00961										1084.2	-0.00105825	-0.00101892	0.00365035	-0.00292027	0.00800065	-0.00579647	0.00819758										1084.2	-0.0200562	-0.0460657	0.0982203	-0.0752307	0.291539	-0.201981
1086.3	0.0429	-0.0204	-0.0147	0.05	0.0856	0.0906	0.1949		1086.3	-0.00512	0.000273297	0.000659743	0.000953885	0.00121	-0.00153	0.01189										1086.3	-0.00398825	-0.000625493	-0.00142991	0.000403611	0.00022065	-0.00266647	0.0104776										1086.3	-0.0755863	-0.0282788	-0.0384747	0.0103976	0.00804037	-0.0929146
1088.4	0.0447	-0.0174	-0.0148	0.0522	0.0823	0.0917	0.1941		1088.4	-0.00325	0.00327	0.000675867	0.00318	-0.00207	-0.000505387	0.01096										1088.4	-0.00211825	0.00237121	-0.00141378	0.00262973	-0.00305935	-0.00164186	0.00954758										1088.4	-0.0401456	0.107203	-0.0380409	0.0677457	-0.111481	-0.0572114
1090.5	0.0438	-0.0223	-0.0144	0.0514	0.0797	0.0912	0.1952		1090.5	-0.00408	-0.00164	0.00119	0.00241	-0.00465	-0.00108	0.01194										1090.5	-0.00294825	-0.00253879	-0.000899651	0.00185973	-0.00563935	-0.00221647	0.0105276										1090.5	-0.055876	-0.11478	-0.024207	0.0479093	-0.205495	-0.0772341
1092.6	0.0426	-0.0197	-0.0134	0.0527	0.0823	0.0933	0.1934		1092.6	-0.00521	0.000953568	0.00231	0.00374	-0.00202	0.00094673	0.01002										1092.6	-0.00407825	5.47776e-05	0.000220349	0.00318973	-0.00300935	-0.000189741	0.00860758										1092.6	-0.077292	0.00247652	0.00592894	0.0821721	-0.109659	-0.00661161
1094.7	0.043	-0.0208	-0.0172	0.0522	0.0829	0.0924	0.1937		1094.7	-0.00474	-0.000153009	-0.00138	0.00326	-0.0014	-2.72113e-05	0.0102										1094.7	-0.00360825	-0.0010518	-0.00346965	0.00270973	-0.00238935	-0.00116368	0.00878758										1094.7	-0.0683845	-0.0475523	-0.0933583	0.0698066	-0.0870666	-0.0405491
1096.8	0.0414	-0.0231	-0.0185	0.0515	0.084	0.0916	0.1969		1096.8	-0.00628	-0.00246	-0.00256	0.00259	-0.000280632	-0.000901153	0.01328										1096.8	-0.00514825	-0.00335879	-0.00464965	0.00203973	-0.00126998	-0.00203762	0.0118676										1096.8	-0.0975709	-0.151852	-0.125109	0.0525464	-0.0462775	-0.0710021
1098.9	0.042	-0.0254	-0.0227	0.0526	0.0856	0.0866	0.1994		1098.9	-0.00561	-0.00477	-0.00664	0.00372	0.00134	-0.00598	0.01565										1098.9	-0.00447825	-0.00566879	-0.00872965	0.00316973	0.00035065	-0.00711647	0.0142376										1098.9	-0.0848729	-0.256289	-0.23489	0.0816569	0.0127775	-0.247977
1101	0.0429	-0.028	-0.0223	0.0524	0.0857	0.0883	0.197		1101	-0.00464	-0.00737	-0.00613	0.00355	0.00146	-0.00435	0.01313										1101	-0.00350825	-0.00826879	-0.00821965	0.00299973	0.00047065	-0.00548647	0.0117176										1101	-0.0664892	-0.373836	-0.221167	0.0772775	0.0171502	-0.191179
1103.1	0.048	-0.0276	-0.021	0.0477	0.0835	0.0884	0.1973		1103.1	0.000530865	-0.00698	-0.00471	-0.00112	-0.000714711	-0.00432	0.01331										1103.1	0.00166262	-0.00787879	-0.00679965	-0.00167027	-0.00170406	-0.00545647	0.0118976										1103.1	0.0315103	-0.356204	-0.182959	-0.0430288	-0.0620951	-0.190134
1105.2	0.0473	-0.0292	-0.0242	0.0469	0.0794	0.0898	0.1986		1105.2	-0.000100394	-0.00859	-0.0078	-0.0019	-0.00479	-0.003	0.01449										1105.2	0.00103136	-0.00948879	-0.00988965	-0.00245027	-0.00577935	-0.00413647	0.0130776										1105.2	0.0195465	-0.428992	-0.266102	-0.0631228	-0.210596	-0.144138
1107.3	0.0493	-0.029	-0.0204	0.0487	0.0817	0.0865	0.194		1107.3	0.00197	-0.00839	-0.00388	-6.84865e-05	-0.00247	-0.00637	0.00976										1107.3	0.00310175	-0.00928879	-0.00596965	-0.000618761	-0.00345935	-0.00750647	0.00834758										1107.3	0.0587852	-0.41995	-0.160626	-0.0159402	-0.126057	-0.261567
1109.4	0.0478	-0.0272	-0.019	0.0497	0.0822	0.0887	0.1941		1109.4	0.000537088	-0.0066	-0.00236	0.000959276	-0.00195	-0.00424	0.00974										1109.4	0.00166884	-0.00749879	-0.00444965	0.000409002	-0.00293935	-0.00537647	0.00832758										1109.4	0.0316283	-0.339024	-0.119727	0.0105365	-0.107108	-0.187346
1111.5	0.0483	-0.0254	-0.0149	0.0515	0.0828	0.0928	0.1944		1111.5	0.00111	-0.00481	0.00185	0.00279	-0.00133	-0.000218743	0.00992										1111.5	0.00224175	-0.00570879	-0.000239651	0.00223973	-0.00231935	-0.00135521	0.00850758										1111.5	0.0424862	-0.258097	-0.00644833	0.0576987	-0.0845159	-0.0472232
1113.6	0.0485	-0.0244	-0.0143	0.0479	0.0863	0.0913	0.1956		1113.6	0.00137	-0.00381	0.00257	-0.000785198	0.0022	-0.00179	0.011										1113.6	0.00250175	-0.00470879	0.000480349	-0.00133547	0.00121065	-0.00292647	0.00958758										1113.6	0.0474138	-0.212886	0.0129248	-0.0344038	0.0441154	-0.101974
1115.7	0.0433	-0.0238	-0.0142	0.051	0.087	0.0871	0.1957		1115.7	-0.00376	-0.00322	0.00279	0.00234	0.00292	-0.00607	0.01097										1115.7	-0.00262825	-0.00411879	0.000700349	0.00178973	0.00193065	-0.00720647	0.00955758										1115.7	-0.0498112	-0.186212	0.0188444	0.046106	0.0703519	-0.251113
1117.8	0.0417	-0.0227	-0.0155	0.0506	0.0884	0.0817	0.1971		1117.8	-0.00529	-0.00213	0.0016	0.00197	0.00434	-0.01154	0.01225										1117.8	-0.00415825	-0.00302879	-0.000489651	0.00141973	0.00335065	-0.0126765	0.0108376										1117.8	-0.0788082	-0.136933	-0.0131751	0.0365743	0.122096	-0.441719
1119.9	0.0457	-0.0206	-0.0136	0.0497	0.0842	0.0844	0.1969		1119.9	-0.00122	-3.19246e-05	0.00362	0.0011	0.000161078	-0.00891	0.01193										1119.9	-8.82494e-05	-0.000930715	0.00153035	0.000549726	-0.000828272	-0.0100465	0.0105176										1119.9	-0.00167252	-0.042078	0.0411773	0.0141618	-0.0301818	-0.350075
1122	0.0462	-0.0255	-0.0112	0.0488	0.083	0.0855	0.1984		1122	-0.000650464	-0.00494	0.00613	0.000225853	-0.00102	-0.00789	0.01331										1122	0.000481287	-0.00583879	0.00404035	-0.000324421	-0.00200935	-0.00902647	0.0118976										1122	0.00912147	-0.263974	0.108714	-0.00835758	-0.0732196	-0.314532
1124.1	0.0456	-0.025	-0.01	0.0495	0.0797	0.0874	0.1943		1124.1	-0.00118	-0.00445	0.00745	0.000953616	-0.00429	-0.00606	0.00909										1124.1	-4.82494e-05	-0.00534879	0.00536035	0.000403342	-0.00527935	-0.00719647	0.00767758										1124.1	-0.000914435	-0.241821	0.144232	0.0103907	-0.192377	-0.250765
1126.2	0.0422	-0.0222	-0.0101	0.048	0.0823	0.0855	0.193		1126.2	-0.00451	-0.00165	0.00747	-0.000518621	-0.00167	-0.00804	0.00766										1126.2	-0.00337825	-0.00254879	0.00538035	-0.0010689	-0.00265935	-0.00917647	0.00624758										1126.2	-0.0640254	-0.115232	0.14477	-0.0275364	-0.0969053	-0.319759
1128.3	0.0443	-0.0223	-0.012	0.0498	0.0835	0.0866	0.1948		1128.3	-0.00234	-0.00176	0.00568	0.00131	-0.000451028	-0.00701	0.00934										1128.3	-0.00120825	-0.00265879	0.00359035	0.000759726	-0.00144038	-0.00814647	0.00792758										1128.3	-0.022899	-0.120205	0.0966059	0.0195717	-0.0524866	-0.283868
1130.4	0.0436	-0.0212	-0.0121	0.0527	0.0843	0.0867	0.1898		1130.4	-0.00298	-0.000664806	0.0057	0.00424	0.000370946	-0.00698	0.00422										1130.4	-0.00184825	-0.0015636	0.00361035	0.00368973	-0.000618404	-0.00811647	0.00280758										1130.4	-0.0350285	-0.0706909	0.0971441	0.0950529	-0.0225343	-0.282823
1132.5	0.0438	-0.022	-0.0147	0.0502	0.0883	0.0911	0.1944		1132.5	-0.00271	-0.00147	0.00321	0.00176	0.00439	-0.00266	0.0087										1132.5	-0.00157825	-0.00236879	0.00112035	0.00120973	0.00340065	-0.00379647	0.00728758										1132.5	-0.0299114	-0.107094	0.0301453	0.0311644	0.123918	-0.13229
1134.6	0.0421	-0.0237	-0.0188	0.0499	0.0877	0.0884	0.1929		1134.6	-0.00434	-0.00318	-0.000769394	0.00149	0.00381	-0.00543	0.00707										1134.6	-0.00320825	-0.00407879	-0.00285905	0.000939726	0.00282065	-0.00656647	0.00565758										1134.6	-0.0608036	-0.184404	-0.0769287	0.0242088	0.102783	-0.228812
1136.7	0.0406	-0.0251	-0.027	0.0523	0.0841	0.0909	0.1972		1136.7	-0.00577	-0.00458	-0.00885	0.00392	0.000236866	-0.00301	0.01125										1136.7	-0.00463825	-0.00547879	-0.0109397	0.00336973	-0.000752484	-0.00414647	0.00983758										1136.7	-0.0879053	-0.247699	-0.294354	0.0868092	-0.0274201	-0.144486
1138.8	0.042	-0.023	-0.0299	0.0552	0.0811	0.0866	0.1943		1138.8	-0.0043	-0.00249	-0.01164	0.00685	-0.00274	-0.00738	0.00823										1138.8	-0.00316825	-0.00338879	-0.0137297	0.00629973	-0.00372935	-0.00851647	0.00681758										1138.8	-0.0600455	-0.153209	-0.369425	0.16229	-0.135896	-0.296761
1140.9	0.0455	-0.0272	-0.0291	0.0556	0.0804	0.0873	0.1943		1140.9	-0.000731793	-0.0067	-0.01072	0.00728	-0.00342	-0.00675	0.00811										1140.9	0.000399958	-0.00759879	-0.0128097	0.00672973	-0.00440935	-0.00788647	0.00669758										1140.9	0.0075801	-0.343545	-0.344671	0.173368	-0.160674	-0.274808
1143	0.0442	-0.0271	-0.0316	0.0514	0.0777	0.0907	0.1933		1143	-0.00196	-0.0066	-0.0131	0.0031	-0.0061	-0.00343	0.00699										1143	-0.000828249	-0.00749879	-0.0151897	0.00254973	-0.00708935	-0.00456647	0.00557758										1143	-0.0156972	-0.339024	-0.40871	0.0656848	-0.258332	-0.159121
1145.1	0.0444	-0.0283	-0.0297	0.0498	0.0772	0.0894	0.1911		1145.1	-0.00169	-0.00781	-0.01109	0.00153	-0.00658	-0.0048	0.00466										1145.1	-0.000558249	-0.00870879	-0.0131797	0.000979726	-0.00756935	-0.00593647	0.00324758										1145.1	-0.0105801	-0.393728	-0.354626	0.0252392	-0.275823	-0.20686
1147.2	0.0445	-0.0237	-0.0276	0.0507	0.084	0.0881	0.194		1147.2	-0.00153	-0.00322	-0.00887	0.00246	0.000246735	-0.00618	0.00744										1147.2	-0.000398249	-0.00411879	-0.0109597	0.00190973	-0.000742615	-0.00731647	0.00602758										1147.2	-0.00754772	-0.186212	-0.294893	0.0491974	-0.0270605	-0.254946
1149.3	0.0462	-0.0242	-0.0217	0.051	0.0873	0.0887	0.1947		1149.3	0.000243171	-0.00372	-0.00286	0.00279	0.00357	-0.00565	0.00802										1149.3	0.00137492	-0.00461879	-0.00494965	0.00223973	0.00258065	-0.00678647	0.00660758										1149.3	0.0260579	-0.208818	-0.133181	0.0576987	0.0940375	-0.236478
1151.4	0.0466	-0.0233	-0.0197	0.0473	0.0891	0.0886	0.1937		1151.4	0.000711913	-0.00283	-0.000740398	-0.000885468	0.00539	-0.00582	0.0069										1151.4	0.00184366	-0.00372879	-0.00283005	-0.00143574	0.00440065	-0.00695647	0.00548758										1151.4	0.0349416	-0.16858	-0.0761485	-0.0369869	0.160357	-0.242402
1153.5	0.0447	-0.0208	-0.0167	0.046	0.0904	0.0934	0.1943		1153.5	-0.00112	-0.000337146	0.00238	-0.00216	0.00671	-0.0011	0.00737										1153.5	1.17506e-05	-0.00123594	0.000290349	-0.00271027	0.00572065	-0.00223647	0.00595758										1153.5	0.000222701	-0.0558772	0.00781244	-0.0698207	0.208457	-0.077931
1155.6	0.0441	-0.0213	-0.0169	0.0469	0.0862	0.0904	0.1959		1155.6	-0.00165	-0.000843722	0.00229	-0.00123	0.00253	-0.00417	0.00885										1155.6	-0.000518249	-0.00174251	0.000200349	-0.00178027	0.00154065	-0.00530647	0.00743758										1155.6	-0.00982199	-0.0787798	0.0053908	-0.0458625	0.0561405	-0.184907
1157.7	0.038	-0.0198	-0.0171	0.0508	0.0807	0.0887	0.194		1157.7	-0.00768	0.000649701	0.00221	0.0027	-0.00294	-0.00595	0.00683										1157.7	-0.00654825	-0.000249089	0.000120349	0.00214973	-0.00392935	-0.00708647	0.00541758										1157.7	-0.124104	-0.0112614	0.00323823	0.0553802	-0.143183	-0.246932
1159.8	0.0392	-0.0212	-0.0123	0.0513	0.0822	0.0872	0.1982		1159.8	-0.00641	-0.000756875	0.00712	0.00323	-0.00142	-0.00752	0.01091										1159.8	-0.00527825	-0.00165567	0.00503035	0.00267973	-0.00240935	-0.00865647	0.00949758										1159.8	-0.100035	-0.0748534	0.135352	0.0690338	-0.0877954	-0.301639
1161.9	0.0423	-0.0219	-0.0126	0.0487	0.0823	0.0879	0.1999		1161.9	-0.00324	-0.00146	0.00694	0.000653346	-0.0013	-0.00689	0.01248										1161.9	-0.00210825	-0.00235879	0.00485035	0.000103072	-0.00228935	-0.00802647	0.0110676										1161.9	-0.0399561	-0.106642	0.130509	0.00265529	-0.0834227	-0.279687
1164	0.0417	-0.0227	-0.0105	0.0516	0.0859	0.0874	0.1957		1164	-0.00378	-0.00227	0.00916	0.00358	0.00232	-0.00747	0.00816										1164	-0.00264825	-0.00316879	0.00707035	0.00302973	0.00133065	-0.00860647	0.00674758										1164	-0.0501903	-0.143262	0.190243	0.0780503	0.0484882	-0.299897
1166.1	0.039	-0.0191	-0.0148	0.0494	0.0883	0.0861	0.1987		1166.1	-0.00641	0.00132	0.00497	0.00141	0.00474	-0.00884	0.01104										1166.1	-0.00527825	0.00042121	0.00288035	0.000859726	0.00375065	-0.00997647	0.00962758										1166.1	-0.100035	0.0190431	0.0775019	0.0221478	0.136672	-0.347636
1168.2	0.0401	-0.0152	-0.0141	0.0491	0.0912	0.0859	0.1987		1168.2	-0.00524	0.00522	0.00579	0.00114	0.00767	-0.00912	0.01092										1168.2	-0.00410825	0.00432121	0.00370035	0.000589726	0.00668065	-0.0102565	0.00950758										1168.2	-0.0778606	0.195364	0.0995657	0.0151922	0.243439	-0.357392
1170.3	0.038	-0.0145	-0.018	0.0488	0.0857	0.0924	0.1964		1170.3	-0.00727	0.00591	0.002	0.000864398	0.00219	-0.00269	0.0085										1170.3	-0.00613825	0.00501121	-8.96514e-05	0.000314124	0.00120065	-0.00382647	0.00708758										1170.3	-0.116334	0.226559	-0.00241226	0.0080923	0.043751	-0.133335
1172.4	0.0379	-0.0147	-0.0178	0.0528	0.0871	0.0943	0.1935		1172.4	-0.0073	0.0057	0.00232	0.00489	0.00361	-0.000863046	0.00547										1172.4	-0.00616825	0.00480121	0.000230349	0.00433973	0.00262065	-0.00199952	0.00405758										1172.4	-0.116902	0.217065	0.00619802	0.111798	0.0954951	-0.0696742
1174.5	0.0373	-0.0157	-0.0235	0.0484	0.0794	0.0934	0.1956		1174.5	-0.00783	0.0047	-0.00326	0.000519923	-0.00407	-0.00184	0.00745										1174.5	-0.00669825	0.00380121	-0.00534965	-3.03512e-05	-0.00505935	-0.00297647	0.00603758										1174.5	-0.126947	0.171854	-0.143944	-0.000781892	-0.18436	-0.103717
1176.6	0.0402	-0.0152	-0.0237	0.0495	0.0774	0.0926	0.1936		1176.6	-0.00486	0.00519	-0.00335	0.00165	-0.00605	-0.00271	0.00533										1176.6	-0.00372825	0.00429121	-0.00543965	0.00109973	-0.00703935	-0.00384647	0.00391758										1176.6	-0.0706587	0.194007	-0.146365	0.0283306	-0.25651	-0.134032
1178.7	0.0391	-0.017	-0.0248	0.0509	0.0756	0.0901	0.1966		1178.7	-0.00589	0.00338	-0.00433	0.00308	-0.00782	-0.00528	0.00821										1178.7	-0.00475825	0.00248121	-0.00641965	0.00252973	-0.00880935	-0.00641647	0.00679758										1178.7	-0.0901795	0.112177	-0.172734	0.0651696	-0.321008	-0.223585
1180.8	0.0429	-0.0216	-0.0259	0.0507	0.0747	0.0912	0.2016		1180.8	-0.00203	-0.00122	-0.00531	0.0029	-0.0087	-0.00426	0.01308										1180.8	-0.000898249	-0.00211879	-0.00739965	0.00234973	-0.00968935	-0.00539647	0.0116676										1180.8	-0.0170238	-0.0957914	-0.199103	0.0605325	-0.353075	-0.188043
1182.9	0.0447	-0.0229	-0.0263	0.048	0.0823	0.0906	0.1995		1182.9	-0.000156969	-0.00253	-0.0056	0.000230974	-0.00108	-0.00493	0.01086										1182.9	0.000974782	-0.00342879	-0.00768965	-0.0003193	-0.00206935	-0.00606647	0.00944758										1182.9	0.0184743	-0.155017	-0.206906	-0.00822565	-0.075406	-0.211389
1185	0.0426	-0.0228	-0.0254	0.0493	0.0865	0.0905	0.1977		1185	-0.00219	-0.00244	-0.00458	0.00156	0.00314	-0.00511	0.00894										1185	-0.00105825	-0.00333879	-0.00666965	0.00100973	0.00215065	-0.00624647	0.00752758										1185	-0.0200562	-0.150948	-0.179461	0.0260121	0.0783685	-0.217662
1187.1	0.0466	-0.0177	-0.0264	0.0487	0.0854	0.0901	0.1965		1187.1	0.00188	0.00266	-0.00547	0.0009865	0.00206	-0.00558	0.00762										1187.1	0.00301175	0.00176121	-0.00755965	0.000436226	0.00107065	-0.00671647	0.00620758										1187.1	0.0570795	0.0796251	-0.203408	0.0112378	0.0390139	-0.234039
1189.2	0.0459	-0.02	-0.0213	0.0504	0.0873	0.09	0.1948		1189.2	0.00125	0.000351057	-0.000250157	0.00271	0.00399	-0.00575	0.0058										1189.2	0.00238175	-0.000547733	-0.00233981	0.00215973	0.00300065	-0.00688647	0.00438758										1189.2	0.0451395	-0.0247633	-0.0629575	0.0556378	0.109342	-0.239963
1191.3	0.043	-0.023	-0.0227	0.0494	0.085	0.0931	0.1883		1191.3	-0.00158	-0.00266	-0.00153	0.00174	0.00171	-0.00273	-0.000827278										1191.3	-0.000448249	-0.00355879	-0.00361965	0.00118973	0.00072065	-0.00386647	-0.0022397										1191.3	-0.00849534	-0.160894	-0.0973944	0.0306491	0.0262601	-0.134729
1193.4	0.0454	-0.0274	-0.021	0.0438	0.0836	0.0954	0.1865		1193.4	0.000886737	-0.00706	0.000282092	-0.00383	0.000330154	-0.000502461	-0.00275										1193.4	0.00201849	-0.00795879	-0.00180756	-0.00438027	-0.000659196	-0.00163893	-0.00416242										1193.4	0.0382549	-0.35982	-0.0486362	-0.112842	-0.0240208	-0.0571095
1195.5	0.0436	-0.0301	-0.0208	0.0462	0.0855	0.0936	0.1895		1195.5	-0.000844522	-0.00977	0.000598217	-0.0014	0.00225	-0.00238	0.000128156										1195.5	0.000287229	-0.0106688	-0.00149143	-0.00195027	0.00126065	-0.00351647	-0.00128427										1195.5	0.00544363	-0.482341	-0.0401302	-0.050242	0.0459374	-0.122533
1197.6	0.0407	-0.0257	-0.0212	0.05	0.0854	0.0927	0.1927		1197.6	-0.00368	-0.00538	0.000314341	0.00243	0.00217	-0.00335	0.00321										1197.6	-0.00254825	-0.00627879	-0.00177531	0.00187973	0.00118065	-0.00448647	0.00179758										1197.6	-0.0482951	-0.283867	-0.0477685	0.0484246	0.0430223	-0.156334
1199.7	0.0406	-0.0265	-0.0183	0.0458	0.085	0.0904	0.1962		1199.7	-0.00371	-0.00618	0.00333	-0.00175	0.0018	-0.00572	0.00658										1199.7	-0.00257825	-0.00707879	0.00124035	-0.00230027	0.00081065	-0.00685647	0.00516758										1199.7	-0.0488636	-0.320035	0.0333742	-0.0592585	0.0295397	-0.238917
1201.8	0.0391	-0.024	-0.0131	0.0428	0.0864	0.0926	0.199		1201.8	-0.00514	-0.00369	0.00865	-0.00472	0.00322	-0.0036	0.00926										1201.8	-0.00400825	-0.00458879	0.00656035	-0.00527027	0.00223065	-0.00473647	0.00784758										1201.8	-0.0759654	-0.207461	0.17652	-0.13577	0.0812837	-0.165045
1203.9	0.0408	-0.0231	-0.0126	0.0458	0.0852	0.0908	0.1963		1203.9	-0.00337	-0.00279	0.00926	-0.00169	0.00204	-0.00547	0.00644										1203.9	-0.00223825	-0.00368879	0.00717035	-0.00224027	0.00105065	-0.00660647	0.00502758										1203.9	-0.0424199	-0.166772	0.192933	-0.0577128	0.0382851	-0.230206
1206	0.0391	-0.0191	-0.0153	0.0422	0.0878	0.0887	0.195		1206	-0.005	0.0012	0.00668	-0.00526	0.00466	-0.00765	0.00502										1206	-0.00386825	0.00030121	0.00459035	-0.00581027	0.00367065	-0.00878647	0.00360758										1206	-0.073312	0.0136178	0.123513	-0.149681	0.133757	-0.306169
1208.1	0.0412	-0.0164	-0.0142	0.0469	0.084	0.0894	0.1887		1208.1	-0.00283	0.00389	0.00789	-0.000535872	0.000883969	-0.00702	-0.00141										1208.1	-0.00169825	0.00299121	0.00580035	-0.00108615	-0.000105381	-0.00815647	-0.00282242										1208.1	-0.0321857	0.135234	0.156071	-0.0279808	-0.00384003	-0.284217
1210.2	0.041	-0.018	-0.0149	0.0444	0.0833	0.0911	0.189		1210.2	-0.00296	0.00229	0.00731	-0.00301	0.000205943	-0.00539	-0.00123										1210.2	-0.00182825	0.00139121	0.00522035	-0.00356027	-0.000783407	-0.00652647	-0.00264242										1210.2	-0.0346494	0.0628972	0.140465	-0.091718	-0.0285469	-0.227418
1212.3	0.0381	-0.0207	-0.0169	0.0464	0.0804	0.0935	0.1879		1212.3	-0.00579	-0.000421283	0.00543	-0.000980346	-0.00267	-0.00307	-0.00245										1212.3	-0.00465825	-0.00132007	0.00334035	-0.00153062	-0.00365935	-0.00420647	-0.00386242										1212.3	-0.0882843	-0.0596811	0.0898791	-0.0394311	-0.133345	-0.146577
1214.4	0.0372	-0.0223	-0.0187	0.0454	0.0799	0.0937	0.1915		1214.4	-0.00663	-0.00203	0.00374	-0.00195	-0.00315	-0.00294	0.00103										1214.4	-0.00549825	-0.00292879	0.00165035	-0.00250027	-0.00413935	-0.00407647	-0.000382423										1214.4	-0.104204	-0.132412	0.0444061	-0.0644108	-0.150836	-0.142047
1216.5	0.0412	-0.0165	-0.0214	0.0457	0.0824	0.0923	0.1936		1216.5	-0.00256	0.00377	0.00116	-0.00162	-0.000628136	-0.00442	0.00301										1216.5	-0.00142825	0.00287121	-0.000929651	-0.00217027	-0.00161749	-0.00555647	0.00159758										1216.5	-0.0270685	0.129809	-0.0250142	-0.0559095	-0.0589403	-0.193618
1218.6	0.04	-0.0192	-0.0223	0.0481	0.0804	0.0921	0.1975		1218.6	-0.00369	0.00106	0.000375586	0.000802942	-0.00261	-0.00469	0.00678										1218.6	-0.00255825	0.00016121	-0.00171407	0.000252668	-0.00359935	-0.00582647	0.00536758										1218.6	-0.0484846	0.00728836	-0.0461206	0.0065091	-0.131158	-0.203027
1220.7	0.0404	-0.0219	-0.0237	0.0514	0.0826	0.0938	0.1982		1220.7	-0.00322	-0.00165	-0.000908289	0.00413	-0.000384189	-0.00306	0.00736										1220.7	-0.00208825	-0.00254879	-0.00299794	0.00357973	-0.00137354	-0.00419647	0.00594758										1220.7	-0.039577	-0.115232	-0.0806659	0.0922191	-0.050051	-0.146228
1222.8	0.0413	-0.0209	-0.0287	0.0483	0.0827	0.0956	0.1957		1222.8	-0.00225	-0.000654165	-0.00579	0.00106	-0.000262216	-0.00134	0.00474										1222.8	-0.00111825	-0.00155296	-0.00787965	0.000509726	-0.00125157	-0.00247647	0.00332758										1222.8	-0.0211933	-0.0702098	-0.212019	0.0131313	-0.0456064	-0.086294
1224.9	0.0415	-0.0204	-0.0304	0.0509	0.0799	0.0981	0.193		1224.9	-0.00198	-0.000160741	-0.00738	0.00369	-0.00304	0.00109	0.00192										1224.9	-0.000848249	-0.00105953	-0.00946965	0.00313973	-0.00402935	-4.64706e-05	0.000507577										1224.9	-0.0160762	-0.0479019	-0.254801	0.0808841	-0.146827	-0.00161929
1227	0.0433	-0.023	-0.0351	0.0473	0.079	0.0926	0.1911		1227	-0.000113404	-0.00277	-0.01196	0.000113993	-0.00392	-0.00449	-0.000106095										1227	0.00101835	-0.00366879	-0.0140497	-0.000436281	-0.00490935	-0.00562647	-0.00151852										1227	0.0193	-0.165868	-0.378036	-0.0112393	-0.178894	-0.196057
1229.1	0.0433	-0.0229	-0.0284	0.0477	0.0804	0.0957	0.1897		1229.1	-4.46625e-05	-0.00267	-0.00514	0.000541756	-0.0025	-0.00146	-0.00163										1229.1	0.00108709	-0.00356879	-0.00722965	-8.51816e-06	-0.00348935	-0.00259647	-0.00304242										1229.1	0.0206028	-0.161347	-0.194529	-0.000219441	-0.12715	-0.0904754
1231.2	0.0421	-0.0244	-0.0262	0.047	0.082	0.0959	0.1905		1231.2	-0.00118	-0.00418	-0.00283	-0.000130481	-0.000874321	-0.00133	-0.000950661										1231.2	-4.82494e-05	-0.00507879	-0.00491965	-0.000680755	-0.00186367	-0.00246647	-0.00236308										1231.2	-0.000914435	-0.229614	-0.132374	-0.0175373	-0.0679112	-0.0859455
1233.3	0.0412	-0.0287	-0.0231	0.045	0.0871	0.0983	0.1905		1233.3	-0.00201	-0.00849	0.000388458	-0.0021	0.00425	0.000992651	-0.00107										1233.3	-0.000878249	-0.00938879	-0.00170119	-0.00265027	0.00326065	-0.00014382	-0.00248242										1233.3	-0.0166448	-0.424471	-0.0457742	-0.0682751	0.118816	-0.00501147
1235.4	0.0424	-0.0264	-0.0242	0.0464	0.0864	0.0967	0.1952		1235.4	-0.000738439	-0.00619	-0.000595418	-0.000674955	0.00357	-0.00068129	0.0035										1235.4	0.000393312	-0.00708879	-0.00268507	-0.00122523	0.00258065	-0.00181776	0.00208758										1235.4	0.00745414	-0.320487	-0.0722475	-0.0315637	0.0940375	-0.0633409
1237.5	0.0404	-0.0202	-0.0192	0.0483	0.0857	0.0967	0.1988		1237.5	-0.00267	-1.99003e-07	0.00452	0.00125	0.00289	-0.000755232	0.00698										1237.5	-0.00153825	-0.000898989	0.00243035	0.000699726	0.00190065	-0.0018917	0.00556758										1237.5	-0.0291533	-0.0406437	0.0653937	0.018026	0.0692587	-0.0659174
1239.6	0.0409	-0.0133	-0.0174	0.0459	0.0856	0.0962	0.1983		1239.6	-0.0021	0.00689	0.00644	-0.00112	0.00281	-0.00133	0.00636										1239.6	-0.000968249	0.00599121	0.00435035	-0.00167027	0.00182065	-0.00246647	0.00494758										1239.6	-0.0183505	0.270865	0.117055	-0.0430288	0.0663435	-0.0859455
1241.7	0.0404	-0.0171	-0.0183	0.0441	0.0873	0.0966	0.1923		1241.7	-0.00253	0.00309	0.00565	-0.00289	0.00454	-0.001	0.000237922										1241.7	-0.00139825	0.00219121	0.00356035	-0.00344027	0.00355065	-0.00213647	-0.0011745										1241.7	-0.0265	0.0990655	0.0957987	-0.0886266	0.129384	-0.0744465
1243.8	0.0379	-0.018	-0.0167	0.046	0.0849	0.0956	0.1951		1243.8	-0.00496	0.00218	0.00737	-0.000963904	0.00216	-0.00208	0.00292										1243.8	-0.00382825	0.00128121	0.00528035	-0.00151418	0.00117065	-0.00321647	0.00150758										1243.8	-0.072554	0.057924	0.142079	-0.0390075	0.0426579	-0.11208
1245.9	0.0386	-0.0158	-0.0183	0.0462	0.0819	0.0947	0.1895		1245.9	-0.00419	0.00437	0.00589	-0.000736141	-0.000820506	-0.00305	-0.00281										1245.9	-0.00305825	0.00347121	0.00380035	-0.00128642	-0.00180986	-0.00418647	-0.00422242										1245.9	-0.0579607	0.156935	0.102256	-0.03314	-0.0659502	-0.14588
1248	0.0356	-0.0195	-0.0169	0.0457	0.0844	0.0936	0.1934		1248	-0.00713	0.000666919	0.0074	-0.00121	0.0017	-0.00422	0.000971072										1248	-0.00599825	-0.000231871	0.00531035	-0.00176027	0.00071065	-0.00535647	-0.000441351										1248	-0.11368	-0.010483	0.142886	-0.0453473	0.0258957	-0.186649
1250.1	0.0316	-0.022	-0.0207	0.0455	0.0822	0.0962	0.1919		1250.1	-0.01106	-0.00184	0.00372	-0.00138	-0.000476559	-0.0017	-0.000651211										1250.1	-0.00992825	-0.00273879	0.00163035	-0.00193027	-0.00146591	-0.00283647	-0.00206363										1250.1	-0.188163	-0.123822	0.043868	-0.0497268	-0.0534169	-0.0988384
1252.2	0.0315	-0.0227	-0.0199	0.0443	0.0848	0.0947	0.193		1252.2	-0.01109	-0.00255	0.00463	-0.00255	0.00215	-0.00327	0.000326505										1252.2	-0.00995825	-0.00344879	0.00254035	-0.00310027	0.00116065	-0.00440647	-0.00108592										1252.2	-0.188731	-0.155921	0.0683534	-0.0798677	0.0422935	-0.153546
1254.3	0.035	-0.0208	-0.0212	0.0443	0.0838	0.1004	0.1961		1254.3	-0.00752	-0.00065281	0.00345	-0.00253	0.00117	0.00235	0.0033										1254.3	-0.00638825	-0.0015516	0.00136035	-0.00308027	0.00018065	0.00121353	0.00188758										1254.3	-0.121072	-0.0701485	0.0366031	-0.0793525	0.00658279	0.0422861
1256.4	0.0405	-0.0155	-0.0272	0.0463	0.0806	0.0965	0.1957		1256.4	-0.00195	0.00464	-0.00243	-0.000497327	-0.00201	-0.00162	0.00278										1256.4	-0.000818249	0.00374121	-0.00451965	-0.0010476	-0.00299935	-0.00275647	0.00136758										1256.4	-0.0155077	0.169142	-0.121611	-0.0269878	-0.109295	-0.0960507
1258.5	0.0386	-0.0123	-0.0242	0.0472	0.0786	0.0977	0.1952		1258.5	-0.00378	0.00783	0.000681952	0.000430435	-0.00399	-0.000494646	0.00216										1258.5	-0.00264825	0.00693121	-0.0014077	-0.000119839	-0.00497935	-0.00163112	0.000747577										1258.5	-0.0501903	0.313363	-0.0378771	-0.00308724	-0.181445	-0.0568371
1260.6	0.0399	-0.0153	-0.0297	0.0491	0.0801	0.0971	0.1922		1260.6	-0.00241	0.00483	-0.0047	0.00236	-0.00247	-0.00117	-0.000962628										1260.6	-0.00127825	0.00393121	-0.00678965	0.00180973	-0.00345935	-0.00230647	-0.00237505										1260.6	-0.0242257	0.177732	-0.18269	0.0466213	-0.126057	-0.0803702
1262.7	0.0394	-0.0201	-0.0331	0.0497	0.0802	0.1009	0.1927		1262.7	-0.00284	2.0885e-05	-0.00799	0.00299	-0.00234	0.00256	-0.000584911										1262.7	-0.00170825	-0.000877905	-0.0100797	0.00243973	-0.00332935	0.00142353	-0.00199733										1262.7	-0.0323752	-0.0396905	-0.271214	0.062851	-0.12132	0.0496037
1264.8	0.041	-0.0231	-0.0329	0.0462	0.0862	0.1008	0.1904		1264.8	-0.00118	-0.00299	-0.00767	-0.000486276	0.00368	0.00238	-0.00301										1264.8	-4.82494e-05	-0.00388879	-0.00975965	-0.00103655	0.00269065	0.00124353	-0.00442242										1264.8	-0.000914435	-0.175814	-0.262604	-0.0267031	0.0980459	0.0433315
1266.9	0.0427	-0.0233	-0.0347	0.0476	0.0857	0.0957	0.1926		1266.9	0.000592679	-0.00319	-0.00935	0.000941487	0.0032	-0.00279	-0.000929478										1266.9	0.00172443	-0.00408879	-0.0114397	0.000391213	0.00221065	-0.00392647	-0.0023419										1266.9	0.0326818	-0.184856	-0.307808	0.0100782	0.0805549	-0.13682
1269	0.0431	-0.023	-0.0324	0.0493	0.0836	0.0984	0.1949		1269	0.00106	-0.0029	-0.00694	0.00267	0.00112	-0.000164354	0.00125										1269	0.00219175	-0.00379879	-0.00902965	0.00211973	0.00013065	-0.00130082	-0.000162423										1269	0.0415386	-0.171745	-0.242962	0.0546073	0.00476081	-0.0453279
1271.1	0.0444	-0.0229	-0.027	0.0466	0.0867	0.1004	0.1977		1271.1	0.00243	-0.00281	-0.00142	-2.98768e-06	0.00424	0.00176	0.00393										1271.1	0.00356175	-0.00370879	-0.00350965	-0.000553262	0.00325065	0.000623529	0.00251758										1271.1	0.0675032	-0.167676	-0.0944346	-0.0142529	0.118452	0.0217272
1273.2	0.0437	-0.0234	-0.0245	0.0456	0.0842	0.1007	0.1963		1273.2	0.0018	-0.00331	0.00119	-0.000975225	0.00177	0.00199	0.0024										1273.2	0.00293175	-0.00420879	-0.000899651	-0.0015255	0.00078065	0.000853529	0.000987577										1273.2	0.0555633	-0.190281	-0.024207	-0.0392992	0.0284465	0.0297417
1275.3	0.0429	-0.0202	-0.0179	0.0478	0.0844	0.0988	0.1947		1275.3	0.00107	-0.000118573	0.00791	0.00125	0.00199	1.38217e-05	0.000681388										1275.3	0.00220175	-0.00101736	0.00582035	0.000699726	0.00100065	-0.00112265	-0.000731035										1275.3	0.0417281	-0.0459954	0.156609	0.018026	0.0364632	-0.0391193
1277.4	0.0398	-0.0186	-0.0191	0.0487	0.0806	0.0974	0.1948		1277.4	-0.00196	0.00147	0.00683	0.00218	-0.00179	-0.00146	0.000659105										1277.4	-0.000828249	0.00057121	0.00474035	0.00162973	-0.00277935	-0.00259647	-0.000753318										1277.4	-0.0156972	0.0258246	0.127549	0.0419842	-0.101278	-0.0904754
1279.5	0.0417	-0.0195	-0.0156	0.0494	0.0795	0.0956	0.1935		1279.5	5.1265e-06	0.000568274	0.01044	0.00291	-0.00287	-0.00333	-0.000763178										1279.5	0.00113688	-0.000330516	0.00835035	0.00235973	-0.00385935	-0.00446647	-0.0021756										1279.5	0.0215464	-0.0149428	0.224684	0.0607901	-0.140633	-0.155637
1281.6	0.0365	-0.0231	-0.0195	0.0484	0.0852	0.0991	0.1966		1281.6	-0.00513	-0.00304	0.00666	0.00194	0.00285	9.19973e-05	0.00221										1281.6	-0.00399825	-0.00393879	0.00457035	0.00138973	0.00186065	-0.00104447	0.000797577										1281.6	-0.0757758	-0.178074	0.122975	0.0358014	0.0678011	-0.0363952
1283.7	0.0406	-0.0238	-0.0192	0.045	0.0876	0.0981	0.1959		1283.7	-0.000957391	-0.00374	0.00708	-0.00144	0.00528	-0.000981944	0.00139										1283.7	0.00017436	-0.00463879	0.00499035	-0.00199027	0.00429065	-0.00211841	-2.24228e-05										1283.7	0.00330451	-0.209722	0.134276	-0.0512725	0.156349	-0.0738173
1285.8	0.0366	-0.0183	-0.0208	0.0416	0.0867	0.0983	0.198		1285.8	-0.00489	0.00175	0.00559	-0.00481	0.0044	-0.000855886	0.00337										1285.8	-0.00375825	0.00085121	0.00350035	-0.00536027	0.00341065	-0.00199236	0.00195758										1285.8	-0.0712273	0.0384836	0.0941843	-0.138089	0.124282	-0.0694247
1287.9	0.0371	-0.016	-0.0194	0.0456	0.0863	0.0997	0.1987		1287.9	-0.00432	0.00404	0.00711	-0.000780885	0.00402	0.000470173	0.00395										1287.9	-0.00318825	0.00314121	0.00502035	-0.00133116	0.00303065	-0.000666298	0.00253758										1287.9	-0.0604245	0.142015	0.135083	-0.0342927	0.110435	-0.0232175
1290	0.0366	-0.0186	-0.0172	0.046	0.0854	0.1005	0.1935		1290	-0.00475	0.00144	0.00942	-0.000353122	0.00314	0.0012	-0.00137										1290	-0.00361825	0.00054121	0.00733035	-0.000903396	0.00215065	6.35294e-05	-0.00278242										1290	-0.068574	0.0244683	0.197239	-0.0232728	0.0783685	0.00221372
1292.1	0.0376	-0.0181	-0.0172	0.0424	0.0833	0.1006	0.192		1292.1	-0.00368	0.00193	0.00954	-0.00393	0.00106	0.00122	-0.003										1292.1	-0.00254825	0.00103121	0.00745035	-0.00448027	7.06499e-05	8.35294e-05	-0.00441242										1292.1	-0.0482951	0.0466214	0.200467	-0.115419	0.00257445	0.00291063
1294.2	0.0352	-0.0205	-0.0171	0.045	0.082	0.1019	0.1936		1294.2	-0.00601	-0.00047776	0.00976	-0.0013	-0.000215113	0.00245	-0.00152										1294.2	-0.00487825	-0.00137655	0.00767035	-0.00185027	-0.00120446	0.00131353	-0.00293242										1294.2	-0.0924538	-0.0622344	0.206387	-0.0476659	-0.04389	0.0457706
1296.3	0.0357	-0.024	-0.0235	0.0454	0.0786	0.1031	0.1972		1296.3	-0.00544	-0.00398	0.00347	-0.000869834	-0.00359	0.00357	0.00196										1296.3	-0.00430825	-0.00487879	0.00138035	-0.00142011	-0.00457935	0.00243353	0.000547577										1296.3	-0.081651	-0.220572	0.0371412	-0.0365841	-0.166869	0.0847977
1298.4	0.0358	-0.0202	-0.0263	0.0456	0.0784	0.0973	0.1968		1298.4	-0.00528	-0.000190913	0.000788317	-0.000642071	-0.00377	-0.0023	0.00144										1298.4	-0.00414825	-0.0010897	-0.00130133	-0.00119235	-0.00475935	-0.00343647	2.75772e-05										1298.4	-0.0786187	-0.049266	-0.0350152	-0.0307166	-0.173428	-0.119746
1300.5	0.0367	-0.0226	-0.0291	0.0449	0.0781	0.0997	0.1993		1300.5	-0.00431	-0.0026	-0.0019	-0.00131	-0.00405	2.6524e-05	0.00381										1300.5	-0.00317825	-0.00349879	-0.00398965	-0.00186027	-0.00503935	-0.00110995	0.00239758										1300.5	-0.060235	-0.158182	-0.10735	-0.0479235	-0.183631	-0.0386767
1302.6	0.0356	-0.0237	-0.0331	0.0452	0.0824	0.102	0.1973		1302.6	-0.00534	-0.0037	-0.00578	-0.000986546	0.000272781	0.00225	0.00169										1302.6	-0.00420825	-0.00459879	-0.00786965	-0.00153682	-0.000716569	0.00111353	0.000277577										1302.6	-0.0797558	-0.207913	-0.21175	-0.0395908	-0.0261114	0.0388015
1304.7	0.0373	-0.0222	-0.0305	0.0416	0.0861	0.0994	0.2		1304.7	-0.00357	-0.00221	-0.00306	-0.00456	0.00399	-0.000421359	0.00427										1304.7	-0.00243825	-0.00310879	-0.00514965	-0.00511027	0.00300065	-0.00155783	0.00285758										1304.7	-0.0462103	-0.14055	-0.138562	-0.131648	0.109342	-0.0542834
1306.8	0.0374	-0.0188	-0.0333	0.0465	0.0815	0.0992	0.1976		1306.8	-0.0034	0.00118	-0.00575	0.00036898	-0.000583271	-0.0006953	0.00175										1306.8	-0.00226825	0.00028121	-0.00783965	-0.000181294	-0.00157262	-0.00183177	0.000337577										1306.8	-0.0429884	0.0127136	-0.210942	-0.00467041	-0.0573055	-0.063829
1308.9	0.0376	-0.017	-0.0307	0.0462	0.0779	0.0987	0.1968		1308.9	-0.00313	0.00298	-0.00303	9.67428e-05	-0.00416	-0.00127	0.000824855										1308.9	-0.00199825	0.00208121	-0.00511965	-0.000453531	-0.00514935	-0.00240647	-0.000587568										1308.9	-0.0378713	0.0940924	-0.137755	-0.0116837	-0.18764	-0.0838548
1311	0.0413	-0.0215	-0.0312	0.0479	0.082	0.1011	0.1954		1311	0.000636245	-0.00153	-0.00341	0.00182	-3.93241e-05	0.00106	-0.000697428										1311	0.001768	-0.00242879	-0.00549965	0.00126973	-0.00102867	-7.64706e-05	-0.00210985										1311	0.0335075	-0.109807	-0.14798	0.0327101	-0.0374843	-0.00266466
1313.1	0.0433	-0.0251	-0.0272	0.0426	0.0829	0.1027	0.1959		1313.1	0.0027	-0.00514	0.000701189	-0.00345	0.000882649	0.00258	-0.000319712										1313.1	0.00383175	-0.00603879	-0.00138846	-0.00400027	-0.000106701	0.00144353	-0.00173213										1313.1	0.0726203	-0.273016	-0.0373595	-0.103053	-0.00388813	0.0503006
1315.2	0.0407	-0.0284	-0.0272	0.0449	0.0845	0.1014	0.1963		1315.2	0.000173727	-0.00844	0.000817313	-0.00112	0.0025	0.00121	-4.19952e-05										1315.2	0.00130548	-0.00933879	-0.00127234	-0.00167027	0.00151065	7.35294e-05	-0.00145442										1315.2	0.0247417	-0.422211	-0.034235	-0.0430288	0.0550473	0.00256217
1317.3	0.038	-0.0262	-0.0292	0.0458	0.0864	0.0974	0.2		1317.3	-0.00246	-0.00625	-0.00107	-0.000192206	0.00443	-0.00287	0.00354										1317.3	-0.00132825	-0.00714879	-0.00315965	-0.00074248	0.00344065	-0.00400647	0.00212758										1317.3	-0.0251733	-0.3232	-0.0850171	-0.0191274	0.125375	-0.139608
1319.4	0.0345	-0.0233	-0.0279	0.0451	0.0869	0.0965	0.1976		1319.4	-0.00589	-0.00336	0.000349562	-0.000864443	0.00495	-0.00384	0.00101										1319.4	-0.00475825	-0.00425879	-0.00174009	-0.00141472	0.00396065	-0.00497647	-0.000402423										1319.4	-0.0901795	-0.192542	-0.0468208	-0.0364452	0.144324	-0.173408
1321.5	0.0385	-0.0215	-0.0255	0.0463	0.088	0.0985	0.1965		1321.5	-0.00182	-0.00156	0.00287	0.00036332	0.00607	-0.00191	-0.000208845										1321.5	-0.000688249	-0.00245879	0.000780349	-0.000186954	0.00508065	-0.00304647	-0.00162127										1321.5	-0.0130439	-0.111163	0.0209969	-0.00481622	0.185136	-0.106156
1323.6	0.0377	-0.0212	-0.0256	0.0472	0.0904	0.1015	0.1998		1323.6	-0.00255	-0.00127	0.00288	0.00129	0.00849	0.00101	0.00297										1323.6	-0.00141825	-0.00216879	0.000790349	0.000739726	0.00750065	-0.000126471	0.00155758										1323.6	-0.026879	-0.098052	0.021266	0.0190565	0.27332	-0.00440694
1325.7	0.0384	-0.0128	-0.0231	0.0465	0.0862	0.098	0.1984		1325.7	-0.00178	0.00712	0.0055	0.000618845	0.00431	-0.00256	0.00145										1325.7	-0.000648249	0.00622121	0.00341035	6.85708e-05	0.00332065	-0.00369647	3.75772e-05										1325.7	-0.0122858	0.281264	0.0917626	0.00176649	0.121003	-0.128806
1327.8	0.0362	-0.0143	-0.019	0.0449	0.0811	0.0999	0.1945		1327.8	-0.00391	0.00562	0.00971	-0.000953392	-0.000763535	-0.000734715	-0.00258										1327.8	-0.00277825	0.00472121	0.00762035	-0.00150367	-0.00175289	-0.00187119	-0.00399242										1327.8	-0.0526541	0.213448	0.205042	-0.0387367	-0.0638742	-0.0652025
1329.9	0.0356	-0.0193	-0.0201	0.046	0.0794	0.0983	0.1943		1329.9	-0.00445	0.000610443	0.00873	0.000174371	-0.00244	-0.00241	-0.0029										1329.9	-0.00331825	-0.000288347	0.00664035	-0.000375903	-0.00342935	-0.00354647	-0.00431242										1329.9	-0.0628883	-0.0130363	0.178673	-0.00968383	-0.124964	-0.123579
1332	0.0355	-0.0194	-0.0207	0.0415	0.0813	0.0998	0.1918		1332	-0.00448	0.000503866	0.00825	-0.0043	-0.000519588	-0.000982598	-0.00552										1332	-0.00334825	-0.000394924	0.00616035	-0.00485027	-0.00150894	-0.00211907	-0.00693242										1332	-0.0634569	-0.0178547	0.165757	-0.12495	-0.0549849	-0.0738401
1334.1	0.037	-0.0229	-0.0213	0.0422	0.0842	0.1	0.1929		1334.1	-0.00291	-0.003	0.00776	-0.00357	0.0024	-0.00085654	-0.00454										1334.1	-0.00177825	-0.00389879	0.00567035	-0.00412027	0.00141065	-0.00199301	-0.00595242										1334.1	-0.0337018	-0.176266	0.152573	-0.106144	0.0514033	-0.0694475
1336.2	0.0331	-0.0155	-0.0249	0.0431	0.0872	0.0969	0.1966		1336.2	-0.00674	0.00439	0.00428	-0.00264	0.00542	-0.00403	-0.000964829										1336.2	-0.00560825	0.00349121	0.00219035	-0.00319027	0.00443065	-0.00516647	-0.00237725										1336.2	-0.106289	0.157839	0.058936	-0.0821863	0.161451	-0.180028
1338.3	0.0344	-0.0129	-0.0241	0.0441	0.084	0.099	0.195		1338.3	-0.00537	0.00698	0.00519	-0.00161	0.00225	-0.002	-0.00269										1338.3	-0.00423825	0.00608121	0.00310035	-0.00216027	0.00126065	-0.00313647	-0.00410242										1338.3	-0.0803244	0.274934	0.0834214	-0.0556519	0.0459374	-0.109292
1340.4	0.0359	-0.011	-0.0293	0.0438	0.0841	0.1015	0.2015		1340.4	-0.0038	0.00888	0.000110807	-0.00189	0.00237	0.000421636	0.00369										1340.4	-0.00266825	0.00798121	-0.00197884	-0.00244027	0.00138065	-0.000714835	0.00227758										1340.4	-0.0505693	0.360834	-0.053245	-0.0628651	0.0503101	-0.0249088
1342.5	0.0379	-0.0133	-0.0344	0.0463	0.0827	0.1021	0.1971		1342.5	-0.00173	0.00657	-0.00487	0.000640948	0.00099028	0.000947694	-0.000831679										1342.5	-0.000598249	0.00567121	-0.00695965	9.06738e-05	9.29916e-07	-0.000188777	-0.0022441										1342.5	-0.0113382	0.256398	-0.187264	0.00233589	3.38856e-05	-0.00657802
1344.6	0.0388	-0.0206	-0.0352	0.0452	0.0801	0.1004	0.2005		1344.6	-0.000763896	-0.000735592	-0.00556	-0.000431289	-0.00159	-0.000826247	0.00245										1344.6	0.000367855	-0.00163438	-0.00764965	-0.000981563	-0.00257935	-0.00196272	0.00103758										1344.6	0.00697167	-0.0738911	-0.20583	-0.0252865	-0.0939901	-0.068392
1346.7	0.0379	-0.0231	-0.0386	0.0423	0.0774	0.0985	0.2007		1346.7	-0.0016	-0.00324	-0.00884	-0.0033	-0.00427	-0.0028	0.00252										1346.7	-0.000468249	-0.00413879	-0.0109297	-0.00385027	-0.00525935	-0.00393647	0.00110758										1346.7	-0.00887438	-0.187117	-0.294085	-0.0991889	-0.191648	-0.137168
1348.8	0.0374	-0.0237	-0.04	0.0442	0.0777	0.0992	0.2028		1348.8	-0.00203	-0.00385	-0.01012	-0.00138	-0.00394	-0.00217	0.0045										1348.8	-0.000898249	-0.00474879	-0.0122097	-0.00193027	-0.00492935	-0.00330647	0.00308758										1348.8	-0.0170238	-0.214695	-0.328526	-0.0497268	-0.179623	-0.115216
1350.9	0.0402	-0.0255	-0.0345	0.0436	0.0785	0.1015	0.1999		1350.9	0.000842328	-0.00566	-0.00451	-0.00195	-0.00312	5.19286e-05	0.00148										1350.9	0.00197408	-0.00655879	-0.00659965	-0.00250027	-0.00410935	-0.00108454	6.75772e-05										1350.9	0.0374132	-0.296526	-0.177578	-0.0644108	-0.149743	-0.0377915
1353	0.038	-0.0221	-0.0291	0.0428	0.0829	0.1013	0.1993		1353	-0.00129	-0.00226	0.00101	-0.00272	0.0013	-0.000222013	0.000756905										1353	-0.000158249	-0.00315879	-0.00107965	-0.00327027	0.00031065	-0.00135848	-0.000655518										1353	-0.00299918	-0.14281	-0.0290503	-0.0842472	0.0113199	-0.0473371
1355.1	0.0409	-0.023	-0.0294	0.043	0.0837	0.1022	0.1985		1355.1	0.00168	-0.00317	0.000823679	-0.00249	0.00212	0.000604046	-0.000165379										1355.1	0.00281175	-0.00406879	-0.00126597	-0.00304027	0.00113065	-0.000532425	-0.0015778										1355.1	0.053289	-0.183952	-0.0340637	-0.078322	0.0412003	-0.0185526
1357.2	0.0401	-0.0142	-0.032	0.0488	0.0834	0.0995	0.1968		1357.2	0.000948551	0.00562	-0.00166	0.00334	0.00184	-0.00217	-0.00199										1357.2	0.0020803	0.00472121	-0.00374965	0.00278973	0.00085065	-0.00330647	-0.00340242										1357.2	0.0394264	0.213448	-0.100892	0.0718675	0.0309972	-0.115216
1359.3	0.0372	-0.0123	-0.0236	0.0459	0.0819	0.1015	0.2		1359.3	-0.00188	0.00752	0.00686	0.00046305	0.000366069	-0.000243837	0.00109										1359.3	-0.000748249	0.00662121	0.00477035	-8.72242e-05	-0.000623281	-0.00138031	-0.000322423										1359.3	-0.014181	0.299348	0.128356	-0.00224703	-0.022712	-0.0480976
1361.4	0.039	-0.0164	-0.0209	0.0508	0.085	0.1012	0.2028		1361.4	-1.39663e-05	0.00341	0.00967	0.00539	0.00349	-0.000617779	0.00377										1361.4	0.00111778	0.00251121	0.00758035	0.00483973	0.00250065	-0.00175425	0.00235758										1361.4	0.0211845	0.113533	0.203965	0.124679	0.0911224	-0.0611278
1363.5	0.0417	-0.0156	-0.0186	0.0458	0.0843	0.1029	0.199		1363.5	0.00275	0.00421	0.01209	0.000418576	0.00281	0.00101	-0.000154512										1363.5	0.00388175	0.00331121	0.0100003	-0.000131698	0.00182065	-0.000126471	-0.00156693										1363.5	0.0735679	0.149701	0.269081	-0.00339274	0.0663435	-0.00440694
1365.6	0.0354	-0.0155	-0.0212	0.0422	0.0834	0.1	0.1992		1365.6	-0.00348	0.0043	0.0096	-0.00315	0.00193	-0.00197	-7.67955e-05										1365.6	-0.00234825	0.00340121	0.00751035	-0.00370027	0.00094065	-0.00310647	-0.00148922										1365.6	-0.0445046	0.15377	0.202082	-0.0953246	0.0342768	-0.108247
1367.7	0.0378	-0.019	-0.0199	0.044	0.0824	0.0985	0.2022		1367.7	-0.00101	0.000792069	0.01102	-0.00133	0.000953963	-0.00354	0.0028										1367.7	0.000121751	-0.000106721	0.00893035	-0.00188027	-3.53871e-05	-0.00467647	0.00138758										1367.7	0.00230745	-0.00482492	0.24029	-0.0484387	-0.00128949	-0.162954
1369.8	0.0397	-0.0199	-0.0174	0.0467	0.0819	0.1004	0.2018		1369.8	0.000960999	-0.000114508	0.01364	0.0014	0.000475937	-0.00171	0.00228										1369.8	0.00209275	-0.0010133	0.0115503	0.000849726	-0.000513413	-0.00284647	0.000867577										1369.8	0.0396623	-0.0458117	0.310787	0.0218902	-0.0187085	-0.0991868
1371.9	0.0376	-0.0217	-0.0147	0.047	0.0856	0.1033	0.2033		1371.9	-0.00107	-0.00192	0.01645	0.00173	0.0042	0.00111	0.00366										1371.9	6.17506e-05	-0.00281879	0.0143603	0.00117973	0.00321065	-2.64706e-05	0.00224758										1371.9	0.00117031	-0.127439	0.386396	0.0303915	0.116994	-0.000922383
1374	0.0395	-0.0222	-0.0192	0.0457	0.088	0.1044	0.1992		1374	0.000898481	-0.00243	0.01207	0.00045739	0.00662	0.00214	-0.000565929										1374	0.00203023	-0.00332879	0.00998035	-9.28842e-05	0.00563065	0.00100353	-0.00197835										1374	0.0384775	-0.150496	0.268542	-0.00239284	0.205178	0.0349685
1376.1	0.0323	-0.0222	-0.0251	0.0424	0.0829	0.0995	0.197		1376.1	-0.00623	-0.00243	0.00628	-0.00281	0.00154	-0.00284	-0.00289										1376.1	-0.00509825	-0.00332879	0.00419035	-0.00336027	0.00055065	-0.00397647	-0.00430242										1376.1	-0.0966233	-0.150496	0.11275	-0.0865657	0.0200654	-0.138562
1378.2	0.0362	-0.0219	-0.0284	0.0458	0.0831	0.1028	0.1986		1378.2	-0.00226	-0.00214	0.0031	0.000612915	0.00176	0.000390689	-0.00141										1378.2	-0.00112825	-0.00303879	0.00101035	6.26408e-05	0.00077065	-0.000745782	-0.00282242										1378.2	-0.0213829	-0.137385	0.0271856	0.00161372	0.0280821	-0.0259872
1380.3	0.04	-0.0213	-0.0319	0.0486	0.0807	0.1033	0.1987		1380.3	0.0016	-0.00155	-0.000282827	0.00344	-0.000614195	0.000816748	-0.00143										1380.3	0.00273175	-0.00244879	-0.00237248	0.00288973	-0.00160355	-0.000319723	-0.00284242										1380.3	0.0517728	-0.110711	-0.0638365	0.0744437	-0.0584323	-0.0111409
1382.4	0.043	-0.0254	-0.0329	0.046	0.0801	0.1055	0.1994		1382.4	0.00467	-0.00565	-0.00117	0.000868441	-0.00119	0.00294	-0.000855062										1382.4	0.00580175	-0.00654879	-0.00325965	0.000318167	-0.00217935	0.00180353	-0.00226748										1382.4	0.109956	-0.296074	-0.0877078	0.00819646	-0.0794144	0.062845
1384.5	0.0388	-0.0243	-0.038	0.0451	0.082	0.1036	0.202		1384.5	0.000542187	-0.00456	-0.00615	-3.79619e-06	0.000729752	0.000968865	0.00162										1384.5	0.00167394	-0.00545879	-0.00823965	-0.00055407	-0.000259598	-0.000167606	0.000207577										1384.5	0.0317249	-0.246794	-0.221705	-0.0142737	-0.00945962	-0.00584031
1386.6	0.0398	-0.0199	-0.0347	0.0463	0.083	0.1007	0.2044		1386.6	0.00161	-0.000167118	-0.00273	0.00122	0.00175	-0.00201	0.0039										1386.6	0.00274175	-0.00106591	-0.00481965	0.000669726	0.00076065	-0.00314647	0.00248758										1386.6	0.0519624	-0.0481902	-0.129683	0.0172531	0.0277177	-0.10964
1388.7	0.041	-0.0186	-0.0331	0.047	0.0816	0.1001	0.199		1388.7	0.00288	0.00113	-0.00102	0.00195	0.000373699	-0.00268	-0.00162										1388.7	0.00401175	0.00023121	-0.00310965	0.00139973	-0.000615651	-0.00381647	-0.00303242										1388.7	0.0760317	0.0104531	-0.0836717	0.036059	-0.022434	-0.132987
1390.8	0.0415	-0.0198	-0.0321	0.0491	0.0838	0.1022	0.1987		1390.8	0.00345	-8.0271e-05	9.77951e-05	0.00408	0.0026	-0.000652959	-0.00204										1390.8	0.00458175	-0.000979061	-0.00199186	0.00352973	0.00161065	-0.00178943	-0.00345242										1390.8	0.0868345	-0.0442638	-0.0535951	0.0909311	0.0586912	-0.0623536
1392.9	0.0419	-0.0205	-0.028	0.0491	0.0797	0.1043	0.1985		1392.9	0.00392	-0.000786847	0.00431	0.00411	-0.00148	0.00137	-0.00237										1392.9	0.00505175	-0.00168564	0.00222035	0.00355973	-0.00246935	0.000233529	-0.00378242										1392.9	0.0957421	-0.0762084	0.0597432	0.0917039	-0.0899818	0.00813746
1395	0.0429	-0.0195	-0.0273	0.0494	0.0819	0.1055	0.1962		1395	0.00499	0.000206576	0.00513	0.00444	0.00073962	0.0025	-0.00479										1395	0.00612175	-0.000692214	0.00304035	0.00388973	-0.00024973	0.00136353	-0.00620242										1395	0.116021	-0.0312953	0.081807	0.100205	-0.00910003	0.0475129
1397.1	0.042	-0.0197	-0.0316	0.0497	0.0797	0.1029	0.1964		1397.1	0.00415	0	0.000946169	0.00476	-0.00144	-0.000174784	-0.00471										1397.1	0.00528175	-0.00089879	-0.00114348	0.00420973	-0.00242935	-0.00131125	-0.00612242										1397.1	0.100101	-0.0406347	-0.0307678	0.108449	-0.0885242	-0.0456914
[truncated: 6 more columns]

## Sheet: Fig6E CO2 timida
	Original data (P700 deltaI/I x10³)						After slope correction in Origin (baseline subtraction tool)								Zero levels						Zero levels set							Maximum at onset of light pulse						Normalized to maximum							Averaged data (shown in Fig. 6E)
Time (ms)	Slug 1	Slug 2	Slug 3	Slug 4	Slug 5		Time (ms)	Slug 1	Slug 2	Slug 3	Slug 4	Slug 5		Slug 1	Slug 2	Slug 3	Slug 4	Slug 5		Time (ms)	Slug 1	Slug 2	Slug 3	Slug 4	Slug 5		Slug 1	Slug 2	Slug 3	Slug 4	Slug 5		Time (ms)	Slug 1	Slug 2	Slug 3	Slug 4	Slug 5		Time (ms)	Average	stdev	SE	n
-198.9	0.0679	-0.0056	0.0447	-0.0021	0.0281		-198.9	0.000153484	-0.00216	0.00278	0	0		-0.0010874	0.000284214	0.000433421	0.000702229	-0.000568947		-198.9	0.00124089	-0.00244421	0.00234658	-0.000702229	0.000568947		0.0279283	0.0269521	0.0343829	0.0467069	0.0250292		-198.9	0.0444312	-0.0906872	0.0682484	-0.0150348	0.0227313		-198.9	0.00593776	0.0620939	0.0277692	5
-196.8	0.0714	-0.0083	0.047	-0.0007	0.0305		-196.8	0.00372	-0.00482	0.00511	0.00148	0.00244								-196.8	0.0048074	-0.00510421	0.00467658	0.000777771	0.00300895								-196.8	0.172134	-0.189381	0.136015	0.0166522	0.120217		-196.8	0.0511274	0.146334	0.0654425
-194.7	0.0702	-0.0083	0.0481	0.003	0.0299		-194.7	0.00259	-0.00478	0.00624	0.00527	0.00188								-194.7	0.0036774	-0.00506421	0.00580658	0.00456777	0.00244895								-194.7	0.131673	-0.187896	0.16888	0.0977966	0.0978434		-194.7	0.0616592	0.142558	0.063754
-192.6	0.069	-0.0028	0.0463	0.0007	0.0338		-192.6	0.00146	0.000758453	0.00446	0.00305	0.00583								-192.6	0.0025474	0.000474239	0.00402658	0.00234777	0.00639895								-192.6	0.0912122	0.0175956	0.11711	0.0502661	0.255659		-192.6	0.106368	0.0917344	0.0410249
-190.5	0.0715	-0.0028	0.0447	-0.0012	0.0337		-190.5	0.00402	0.000797994	0.00289	0.00124	0.00577								-190.5	0.0051074	0.00051378	0.00245658	0.000537771	0.00633895								-190.5	0.182875	0.0190627	0.0714476	0.0115137	0.253262		-190.5	0.107632	0.106374	0.0475721
-188.4	0.0686	-0.0029	0.0456	-0.0009	0.028		-188.4	0.00119	0.000737536	0.00382	0.00162	0.000111369								-188.4	0.0022774	0.000453322	0.00338658	0.000917771	0.000680316								-188.4	0.0815446	0.0168195	0.0984959	0.0196496	0.0271808		-188.4	0.0487381	0.0383463	0.017149
-186.3	0.0663	-0.0037	0.0423	-0.0062	0.0238		-186.3	-0.00104	-2.29231e-05	0.000546943	-0.00359	-0.00405								-186.3	4.74038e-05	-0.000307137	0.000113522	-0.00429223	-0.00348105								-186.3	0.00169734	-0.0113957	0.0033017	-0.0918972	-0.139079		-186.3	-0.0474746	0.0645419	0.028864
-184.2	0.0658	-0.0049	0.0399	-0.0037	0.0284		-184.2	-0.00148	-0.00118	-0.00183	-0.00101	0.000595916								-184.2	-0.000392596	-0.00146421	-0.00226342	-0.00171223	0.00116486								-184.2	-0.0140573	-0.0543264	-0.0658298	-0.036659	0.0465401		-184.2	-0.0248665	0.0444429	0.0198755
-182.1	0.0683	-0.0038	0.0428	-0.003	0.0327		-182.1	0.00109	-4.38407e-05	0.0011	-0.000223444	0.00494								-182.1	0.0021774	-0.000328055	0.000666579	-0.000925673	0.00550895								-182.1	0.077964	-0.0121718	0.0193869	-0.0198188	0.2201		-182.1	0.0570922	0.0989214	0.044239
-180	0.068	-0.0065	0.0409	-0.0013	0.0304		-180	0.000859631	-0.0027	-0.000769609	0.00156	0.00268								-180	0.00194703	-0.00298421	-0.00120303	0.000857771	0.00324895								-180	0.0697154	-0.110723	-0.0349891	0.018365	0.129806		-180	0.0144349	0.0928561	0.0415265
-177.9	0.0637	-0.0074	0.0419	-0.0016	0.031		-177.9	-0.00337	-0.00356	0.000258207	0.00135	0.00332								-177.9	-0.0022826	-0.00384421	-0.000175214	0.000647771	0.00388895								-177.9	-0.0817305	-0.142631	-0.00509595	0.0138689	0.155376		-177.9	-0.0120425	0.112537	0.0503281
-175.8	0.0628	-0.0095	0.0409	0.002	0.0298		-175.8	-0.00421	-0.00563	-0.000713978	0.00503	0.00217								-175.8	-0.0031226	-0.00591421	-0.0011474	0.00432777	0.00273895								-175.8	-0.111808	-0.219434	-0.0333712	0.0926581	0.10943		-175.8	-0.0325049	0.138783	0.0620658
-173.7	0.0637	-0.0053	0.0392	0.0071	0.028		-173.7	-0.00324	-0.00139	-0.00239	0.01021	0.000407285								-173.7	-0.0021526	-0.00167421	-0.00282342	0.00950777	0.000976232								-173.7	-0.0770758	-0.062118	-0.0821169	0.203563	0.0390036		-173.7	0.00425111	0.121872	0.0545028
-171.6	0.0665	-0.0033	0.0357	0.0035	0.0262		-171.6	-0.000370971	0.000653865	-0.00586	0.0067	-0.00135								-171.6	0.000716433	0.000369651	-0.00629342	0.00599777	-0.000781053								-171.6	0.0256526	0.0137151	-0.183039	0.128413	-0.0312056		-171.6	-0.00929279	0.113337	0.050686
-169.5	0.0655	0.0015	0.0388	-0.0028	0.0167		-169.5	-0.0013	0.00549	-0.00273	0.000483974	-0.01081								-169.5	-0.000212596	0.00520579	-0.00316342	-0.000218255	-0.0102411								-169.5	-0.00761221	0.193149	-0.0920055	-0.00467287	-0.409163		-169.5	-0.064061	0.219515	0.09817
-167.4	0.0647	-0.0026	0.0405	-0.0041	0.016		-167.4	-0.00204	0.00143	-0.001	-0.000731457	-0.01147								-167.4	-0.000952596	0.00114579	-0.00143342	-0.00143369	-0.0109011								-167.4	-0.0341086	0.0425118	-0.0416899	-0.0306954	-0.435533		-167.4	-0.0999029	0.190681	0.085275
-165.3	0.0635	-0.0058	0.0395	-0.0041	0.0177		-165.3	-0.00317	-0.00173	-0.00197	-0.000646887	-0.00972								-165.3	-0.0020826	-0.00201421	-0.00240342	-0.00134912	-0.00915105								-165.3	-0.0745694	-0.074733	-0.0699015	-0.0288847	-0.365614		-165.3	-0.122741	0.137126	0.0613244
-163.2	0.0647	-0.0029	0.044	-0.0047	0.024		-163.2	-0.0019	0.00121	0.00255	-0.00116	-0.00338								-163.2	-0.000812596	0.000925786	0.00211658	-0.00186223	-0.00281105								-163.2	-0.0290958	0.0343492	0.061559	-0.0398706	-0.112311		-163.2	-0.0170738	0.0681207	0.0304645
-161.1	0.0662	0.0003	0.0428	-0.0041	0.034		-161.1	-0.000334222	0.00445	0.00138	-0.000477748	0.00666								-161.1	0.000753182	0.00416579	0.000946579	-0.00117998	0.00722895								-161.1	0.0269684	0.154562	0.0275305	-0.0252635	0.28882		-161.1	0.0945235	0.127236	0.0569019
-159	0.0649	-0.0023	0.0438	-0.005	0.0362		-159	-0.00157	0.00189	0.00241	-0.00129	0.0089								-159	-0.000482596	0.00160579	0.00197658	-0.00199223	0.00946895								-159	-0.0172798	0.0595791	0.0574872	-0.0426539	0.378315		-159	0.0870896	0.168947	0.0755552
-156.9	0.0622	-0.0058	0.0492	-0.0035	0.0364		-156.9	-0.0042	-0.00157	0.00784	0.000291391	0.00915								-156.9	-0.0031126	-0.00185421	0.00740658	-0.000410838	0.00971895								-156.9	-0.111449	-0.0687965	0.215414	-0.00879609	0.388304		-156.9	0.0829352	0.212146	0.0948744
-154.8	0.0626	-0.0033	0.0493	0.001	0.0347		-154.8	-0.00373	0.000970195	0.00796	0.00488	0.00749								-154.8	-0.0026426	0.000685981	0.00752658	0.00417777	0.00805895								-154.8	-0.0946207	0.0254518	0.218904	0.0894466	0.321981		-154.8	0.112233	0.162951	0.0728738
-152.7	0.0616	-0.0023	0.0485	0.0043	0.0347		-152.7	-0.00466	0.00201	0.00719	0.00826	0.00753								-152.7	-0.0035726	0.00172579	0.00675658	0.00755777	0.00809895								-152.7	-0.12792	0.0640315	0.19651	0.161813	0.323579		-152.7	0.123603	0.168507	0.0753587
-150.6	0.062	-0.003	0.0424	0.0019	0.0284		-150.6	-0.0042	0.00135	0.00112	0.00595	0.00127								-150.6	-0.0031126	0.00106579	0.000686579	0.00524777	0.00183895								-150.6	-0.111449	0.0395436	0.0199686	0.112355	0.0734719		-150.6	0.026778	0.0848823	0.0379605
-148.5	0.0651	0.0006	0.0452	-0.0034	0.0234		-148.5	-0.00103	0.00499	0.00395	0.000729669	-0.00369								-148.5	5.74038e-05	0.00470579	0.00351658	2.74401e-05	-0.00312105								-148.5	0.0020554	0.174598	0.102277	0.000587496	-0.124696		-148.5	0.0309643	0.113693	0.0508452
-146.4	0.0663	-0.0014	0.0458	-0.0023	0.0222		-146.4	0.000237225	0.00303	0.00458	0.00191	-0.00484								-146.4	0.00132463	0.00274579	0.00414658	0.00120777	-0.00427105								-146.4	0.0474296	0.101876	0.1206	0.0258585	-0.170642		-146.4	0.0250244	0.116006	0.0518792
-144.3	0.0642	-0.0033	0.0444	-0.0027	0.0258		-144.3	-0.0018	0.00117	0.0032	0.0016	-0.0012								-144.3	-0.000712596	0.000885786	0.00276658	0.000897771	-0.000631053								-144.3	-0.0255152	0.0328651	0.0804637	0.0192214	-0.0252126		-144.3	0.0163645	0.0443613	0.019839
-142.2	0.0642	-0.0006	0.0426	-0.0017	0.0281		-142.2	-0.00173	0.00391	0.00143	0.00268	0.00114								-142.2	-0.000642596	0.00362579	0.000996579	0.00197777	0.00170895								-142.2	-0.0230088	0.134527	0.0289847	0.0423443	0.068278		-142.2	0.050225	0.0576826	0.0257965
-140.1	0.0631	-0.003	0.0445	-0.0064	0.034		-140.1	-0.00276	0.00155	0.00336	-0.00193	0.00708								-140.1	-0.0016726	0.00126579	0.00292658	-0.00263223	0.00764895								-140.1	-0.0598889	0.0469642	0.0851172	-0.0563564	0.3056		-140.1	0.0642873	0.149115	0.066686
-138	0.0615	-0.0024	0.04	-0.0087	0.0349		-138	-0.00429	0.00219	-0.00111	-0.00415	0.00803								-138	-0.0032026	0.00190579	-0.00154342	-0.00485223	0.00859895								-138	-0.114672	0.07071	-0.0448891	-0.103887	0.343556		-138	0.0301636	0.190025	0.0849819
-135.9	0.0601	-0.0034	0.0398	-0.0108	0.028		-135.9	-0.00563	0.00123	-0.00129	-0.00616	0.00117								-135.9	-0.0045426	0.000945786	-0.00172342	-0.00686223	0.00173895								-135.9	-0.162652	0.0350913	-0.0501243	-0.146921	0.0694766		-135.9	-0.0510259	0.104396	0.0466873
-133.8	0.064	-0.0023	0.0387	-0.007	0.0227		-133.8	-0.00166	0.00237	-0.00236	-0.00228	-0.00409								-133.8	-0.000572596	0.00208579	-0.00279342	-0.00298223	-0.00352105								-133.8	-0.0205024	0.0773885	-0.0812444	-0.0638499	-0.140678		-133.8	-0.0457771	0.0812392	0.0363313
-131.7	0.0642	-0.0013	0.0376	-0.0022	0.019		-131.7	-0.00139	0.00341	-0.00343	0.00261	-0.00775								-131.7	-0.000302596	0.00312579	-0.00386342	0.00190777	-0.00718105								-131.7	-0.0108347	0.115975	-0.112364	0.0408456	-0.286906		-131.7	-0.0506569	0.156002	0.0697662
-129.6	0.0648	0	0.0376	-0.0051	0.0174		-129.6	-0.000723977	0.00474	-0.0034	-0.000209205	-0.0093								-129.6	0.000363427	0.00445579	-0.00383342	-0.000911434	-0.00873105								-129.6	0.0130128	0.165322	-0.111492	-0.0195139	-0.348834		-129.6	-0.060301	0.189615	0.0847986
-127.5	0.0648	-0.0041	0.0397	-0.0063	0.0145		-127.5	-0.000656628	0.000684231	-0.00127	-0.00132	-0.01216								-127.5	0.000430776	0.000400017	-0.00170342	-0.00202223	-0.0115911								-127.5	0.0154243	0.0148417	-0.0495426	-0.0432962	-0.4631		-127.5	-0.105135	0.202474	0.0905491
-125.4	0.0617	-0.0048	0.0423	-0.004	0.0166		-125.4	-0.00369	2.37718e-05	0.00135	0.00106	-0.01002								-125.4	-0.0026026	-0.000260442	0.000916579	0.000357771	-0.00945105								-125.4	-0.0931885	-0.00966314	0.026658	0.00765993	-0.3776		-125.4	-0.0892268	0.167572	0.0749405
-123.3	0.0655	-0.0055	0.0394	-0.0048	0.0228		-123.3	0.000178072	-0.000636687	-0.00152	0.000344504	-0.00378								-123.3	0.00126548	-0.000920901	-0.00195342	-0.000357725	-0.00321105								-123.3	0.0453116	-0.034168	-0.0568137	-0.00765894	-0.128292		-123.3	-0.0363242	0.06397	0.0286083
-121.2	0.0659	-0.0043	0.0387	-0.0072	0.0315		-121.2	0.000645421	0.000602854	-0.00219	-0.00197	0.00496								-121.2	0.00173282	0.00031864	-0.00262342	-0.00267223	0.00552895								-121.2	0.0620455	0.0118224	-0.0763001	-0.0572128	0.220899		-121.2	0.0322509	0.119038	0.0532355
-119.1	0.0612	-0.0077	0.0422	-0.0093	0.0294		-119.1	-0.00399	-0.00276	0.00134	-0.00399	0.00291								-119.1	-0.0029026	-0.00304421	0.000906579	-0.00469223	0.00347895								-119.1	-0.10393	-0.112949	0.0263671	-0.100461	0.138995		-119.1	-0.0303956	0.110733	0.0495211
-117	0.0626	-0.0063	0.0431	-0.0113	0.0278		-117	-0.00252	-0.00132	0.00226	-0.0059	0.00135								-117	-0.0014326	-0.00160421	0.00182658	-0.00660223	0.00191895								-117	-0.0512955	-0.0595208	0.0531246	-0.141355	0.0766682		-117	-0.0244756	0.0892469	0.0399124
-114.9	0.0638	-0.0071	0.0427	-0.0045	0.0241		-114.9	-0.00125	-0.00208	0.00189	0.000982782	-0.00231								-114.9	-0.000162596	-0.00236421	0.00145658	0.000280553	-0.00174105								-114.9	-0.00582191	-0.087719	0.0423634	0.00600668	-0.0695608		-114.9	-0.0229463	0.0542339	0.0242542
-112.8	0.0652	-0.0031	0.0427	-0.0059	0.021		-112.8	0.00021482	0.00196	0.00192	-0.000332648	-0.00537								-112.8	0.00130222	0.00167579	0.00148658	-0.00103488	-0.00480105								-112.8	0.0466274	0.0621763	0.0432359	-0.0221568	-0.191818		-112.8	-0.012387	0.105389	0.0471313
-110.7	0.0661	0.0005	0.0423	-0.0047	0.0227		-110.7	0.00118	0.0056	0.00155	0.000951921	-0.00362								-110.7	0.0022674	0.00531579	0.00111658	0.000249692	-0.00305105								-110.7	0.0811866	0.19723	0.0324748	0.00534594	-0.1219		-110.7	0.0388677	0.116061	0.0519039
-108.6	0.0684	-0.0021	0.043	-0.005	0.0241		-108.6	0.00355	0.00304	0.00228	0.000736491	-0.00218								-108.6	0.0046374	0.00275579	0.00184658	3.42621e-05	-0.00161105								-108.6	0.166047	0.102247	0.0537063	0.000733556	-0.0643668		-108.6	0.0516734	0.0890271	0.0398141
-106.5	0.0636	-0.0055	0.0458	-0.0037	0.0216		-106.5	-0.00118	-0.000320357	0.0051	0.00212	-0.00464								-106.5	-9.25962e-05	-0.000604571	0.00466658	0.00141777	-0.00407105								-106.5	-0.0033155	-0.0224313	0.135724	0.0303547	-0.162652		-106.5	-0.00446406	0.107485	0.0480689
-104.4	0.0619	-0.0055	0.046	0.0001	0.0228		-104.4	-0.00282	-0.000280816	0.00533	0.00601	-0.0034								-104.4	-0.0017326	-0.00056503	0.00489658	0.00530777	-0.00283105								-104.4	-0.0620373	-0.0209642	0.142413	0.11364	-0.11311		-104.4	0.0119884	0.111309	0.049779
-102.3	0.0645	-0.0006	0.0377	-0.0006	0.0344		-102.3	-0.000148432	0.00466	-0.00294	0.00539	0.00824								-102.3	0.000938972	0.00437579	-0.00337342	0.00468777	0.00880895								-102.3	0.0336208	0.162354	-0.0981132	0.100366	0.351946		-102.3	0.110035	0.16622	0.0743359
-100.2	0.0637	-0.002	0.0409	-0.0043	0.0341		-100.2	-0.000881082	0.0033	0.000287391	0.00177	0.00799								-100.2	0.000206322	0.00301579	-0.00014603	0.00106777	0.00855895								-100.2	0.00738755	0.111894	-0.00424716	0.0228611	0.341958		-100.2	0.0959707	0.144913	0.0648069
-98.1	0.0599	-0.0042	0.0408	-0.0093	0.0291		-98.1	-0.00461	0.00114	0.000215207	-0.00314	0.00303								-98.1	-0.0035226	0.000855786	-0.000218214	-0.00384223	0.00359895								-98.1	-0.12613	0.031752	-0.00634657	-0.0822626	0.14379		-98.1	-0.00783949	0.104991	0.0469535
-96	0.0628	-0.0058	0.0401	-0.0087	0.0249		-96	-0.00165	-0.000422651	-0.000456977	-0.00246	-0.00113								-96	-0.000562596	-0.000706865	-0.000890398	-0.00316223	-0.000561053								-96	-0.0201443	-0.0262267	-0.0258965	-0.0677037	-0.0224159		-96	-0.0324774	0.0198533	0.00887866
-93.9	0.0641	-0.0042	0.0416	-0.0023	0.0209		-93.9	-0.000279033	0.00122	0.00107	0.00403	-0.00509								-93.9	0.000808371	0.000935786	0.000636579	0.00332777	-0.00452105								-93.9	0.0289445	0.0347203	0.0185144	0.071248	-0.180631		-93.9	-0.00544073	0.0999272	0.0446888
-91.8	0.0645	-0.0019	0.0388	-0.0047	0.0229		-91.8	0.000188317	0.00356	-0.0017	0.00171	-0.00304								-91.8	0.00127572	0.00327579	-0.00213342	0.00100777	-0.00247105								-91.8	0.0456784	0.121541	-0.0620488	0.0215765	-0.0987266		-91.8	0.00560405	0.0876986	0.03922
-89.7	0.0645	-0.0014	0.0387	-0.0055	0.0236		-89.7	0.000255666	0.0041	-0.00177	0.000997617	-0.0023								-89.7	0.00134307	0.00381579	-0.00220342	0.000295388	-0.00173105								-89.7	0.0480899	0.141576	-0.0640847	0.0063243	-0.0691612		-89.7	0.0125489	0.0873201	0.0390508
-87.6	0.0633	-0.0016	0.0427	0.0002	0.0234		-87.6	-0.000876984	0.00394	0.00225	0.00678	-0.00246								-87.6	0.00021042	0.00365579	0.00181658	0.00607777	-0.00189105								-87.6	0.00753428	0.13564	0.0528337	0.130126	-0.0755537		-87.6	0.050116	0.0885005	0.0395786
-85.5	0.0606	-0.0094	0.0419	0.0007	0.0214		-85.5	-0.00351	-0.00382	0.00148	0.00737	-0.00442								-85.5	-0.0024226	-0.00410421	0.00104658	0.00666777	-0.00385105								-85.5	-0.0867434	-0.152278	0.0304389	0.142758	-0.153862		-85.5	-0.0439373	0.128492	0.0574632
-83.4	0.0627	-0.0099	0.0397	-0.001	0.0255		-83.4	-0.00134	-0.00429	-0.000690082	0.00575	-0.000274944								-83.4	-0.000252596	-0.00457421	-0.0011235	0.00504777	0.000294003								-83.4	-0.00904445	-0.169716	-0.0326762	0.108073	0.0117464		-83.4	-0.0183234	0.100115	0.0447729
-81.3	0.0601	-0.0047	0.0391	-0.0092	0.025		-81.3	-0.00387	0.000954137	-0.00126	-0.00236	-0.00073267								-81.3	-0.0027826	0.000669923	-0.00169342	-0.00306223	-0.000163723								-81.3	-0.0996335	0.024856	-0.0492518	-0.0655627	-0.00654128		-81.3	-0.0392267	0.0490357	0.0219294
-79.2	0.0626	-0.0059	0.0384	-0.0162	0.0235		-79.2	-0.00131	-0.000206322	-0.00193	-0.00928	-0.00219								-79.2	-0.000222596	-0.000490536	-0.00236342	-0.00998223	-0.00162105								-79.2	-0.00797027	-0.0182003	-0.0687382	-0.213721	-0.0647664		-79.2	-0.0746792	0.0823196	0.0368145
-77.1	0.0614	-0.0044	0.0407	-0.013	0.0184		-77.1	-0.00244	0.00133	0.000393365	-0.00599	-0.00725								-77.1	-0.0013526	0.00104579	-4.00558e-05	-0.00669223	-0.00668105								-77.1	-0.048431	0.0388016	-0.00116499	-0.143281	-0.26693		-77.1	-0.0842011	0.122663	0.0548564
-75	0.0602	-0.0076	0.0406	-0.0106	0.0169		-75	-0.00357	-0.00183	0.000321181	-0.00351	-0.00871								-75	-0.0024826	-0.00211421	-0.00011224	-0.00421223	-0.00814105								-75	-0.0888917	-0.0784433	-0.0032644	-0.0901844	-0.325262		-75	-0.117209	0.121762	0.0544538
-72.9	0.0621	-0.008	0.0426	-0.0078	0.0226		-72.9	-0.00161	-0.00219	0.00235	-0.000625827	-0.00296								-72.9	-0.000522596	-0.00247421	0.00191658	-0.00132806	-0.00239105								-72.9	-0.0187121	-0.0918003	0.0557422	-0.0284338	-0.0955304		-72.9	-0.0357469	0.0621087	0.0277758
-70.8	0.0595	-0.0026	0.0401	-0.006	0.0292		-70.8	-0.00414	0.00325	-0.000123187	0.00126	0.00368								-70.8	-0.0030526	0.00296579	-0.000556608	0.000557771	0.00424895								-70.8	-0.109301	0.110039	-0.0161885	0.011942	0.169759		-70.8	0.0332501	0.109259	0.0488622
-68.7	0.0614	-0.0042	0.0436	-0.0067	0.0292		-68.7	-0.00217	0.00169	0.0034	0.000643312	0.00372								-68.7	-0.0010826	0.00140579	0.00296658	-5.89169e-05	0.00428895								-68.7	-0.0387634	0.0521586	0.0862805	-0.00126142	0.171357		-68.7	0.0539543	0.0813588	0.0363848
-66.6	0.0615	-0.0038	0.0424	-0.005	0.0301		-66.6	-0.002	0.00213	0.00223	0.00243	0.00466								-66.6	-0.000912596	0.00184579	0.00179658	0.00172777	0.00522895								-66.6	-0.0326764	0.0684838	0.052252	0.0369918	0.208913		-66.6	0.0667929	0.0883102	0.0394935
-64.5	0.0616	-0.01	0.0423	-0.0028	0.0319		-64.5	-0.00184	-0.00403	0.00216	0.00471	0.00651								-64.5	-0.000752596	-0.00431421	0.00172658	0.00400777	0.00707895								-64.5	-0.0269474	-0.160069	0.0502162	0.0858069	0.282827		-64.5	0.0463666	0.162384	0.0726205
-62.4	0.0613	-0.0092	0.0386	-0.0057	0.0319		-62.4	-0.00207	-0.00319	-0.00151	0.0019	0.00655								-62.4	-0.000982596	-0.00347421	-0.00194342	0.00119777	0.00711895								-62.4	-0.0351828	-0.128903	-0.0565228	0.0256444	0.284425		-62.4	0.0178922	0.158905	0.0710645
-60.3	0.0652	-0.0083	0.0355	-0.0078	0.0286		-60.3	0.0019	-0.00225	-0.00458	-0.00011841	0.00329								-60.3	0.0029874	-0.00253421	-0.00501342	-0.000820639	0.00385895								-60.3	0.106967	-0.0940264	-0.145811	-0.01757	0.154177		-60.3	0.000747329	0.128082	0.0572802
-58.2	0.0654	-0.0057	0.0373	-0.0088	0.0243		-58.2	0.00217	0.00038909	-0.00276	-0.00103	-0.000967659								-58.2	0.0032574	0.000104876	-0.00319342	-0.00173223	-0.000398712								-58.2	0.116634	0.00389118	-0.0928781	-0.0370872	-0.0159299		-58.2	-0.0050739	0.077048	0.0344569
-56.1	0.0622	-0.0092	0.0351	-0.0081	0.022		-56.1	-0.000966739	-0.00307	-0.00493	-0.000249271	-0.00323								-56.1	0.000120665	-0.00335421	-0.00536342	-0.0009515	-0.00266105								-56.1	0.00432052	-0.124451	-0.155991	-0.0203717	-0.106318		-56.1	-0.0805621	0.069114	0.0309087
-54	0.0645	-0.0065	0.0366	-0.0078	0.0195		-54	0.0014	-0.000331827	-0.0034	0.000135299	-0.00568								-54	0.0024874	-0.000616041	-0.00383342	-0.00056693	-0.00511105								-54	0.0890639	-0.0228569	-0.111492	-0.012138	-0.204203		-54	-0.0523252	0.110727	0.0495186
-51.9	0.0657	-0.0044	0.0348	-0.0067	0.0244		-51.9	0.00267	0.00181	-0.00517	0.00132	-0.000740838								-51.9	0.0037574	0.00152579	-0.00560342	0.000617771	-0.000171891								-51.9	0.134537	0.0566109	-0.162971	0.0132266	-0.00686762		-51.9	0.00690727	0.109371	0.0489123
-49.8	0.0638	-0.0022	0.0343	-0.0092	0.0283		-49.8	0.00083531	0.00405	-0.00565	-0.0011	0.0032								-49.8	0.00192271	0.00376579	-0.00608342	-0.00180223	0.00376895								-49.8	0.0688446	0.139721	-0.176931	-0.038586	0.150582		-49.8	0.028726	0.137481	0.0614834
-47.7	0.0634	-0.0036	0.0358	-0.0085	0.0259		-47.7	0.00050266	0.00269	-0.00412	-0.000310992	0.00084371								-47.7	0.00159006	0.00240579	-0.00455342	-0.00101322	0.00141266								-47.7	0.0569338	0.0892614	-0.132433	-0.0216932	0.0564402		-47.7	0.00970192	0.0893489	0.039958
-45.6	0.0587	-0.0058	0.0367	-0.0073	0.0174		-45.6	-0.00413	0.000526338	-0.00319	0.000973577	-0.00761								-45.6	-0.0030426	0.000242124	-0.00362342	0.000271348	-0.00704105								-45.6	-0.108943	0.00898347	-0.105384	0.0058096	-0.281313		-45.6	-0.0961695	0.118304	0.052907
-43.5	0.062	-0.0077	0.0404	-0.0087	0.0165		-43.5	-0.000762641	-0.00133	0.000538418	-0.000341853	-0.00847								-43.5	0.000324763	-0.00161421	0.000104997	-0.00104408	-0.00790105								-43.5	0.0116284	-0.0598919	0.00305376	-0.0223539	-0.315673		-43.5	-0.0766473	0.136479	0.0610355
-41.4	0.0647	-0.0088	0.0412	-0.0099	0.0185		-41.4	0.002	-0.00239	0.00137	-0.00146	-0.00643								-41.4	0.0030874	-0.00267421	0.000936579	-0.00216223	-0.00586105								-41.4	0.110547	-0.0992208	0.0272396	-0.0462936	-0.234168		-41.4	-0.0483791	0.130463	0.0583449
-39.3	0.0609	-0.0073	0.0412	-0.0137	0.0187		-39.3	-0.00173	-0.000855039	0.00139	-0.00517	-0.00619								-39.3	-0.000642596	-0.00113925	0.000956579	-0.00587223	-0.00562105								-39.3	-0.0230088	-0.0422695	0.0278213	-0.125725	-0.224579		-39.3	-0.0775523	0.099072	0.0443064
-37.2	0.0588	-0.0108	0.042	-0.0151	0.0158		-37.2	-0.00376	-0.00432	0.00222	-0.00649	-0.00904								-37.2	-0.0026726	-0.00460421	0.00178658	-0.00719223	-0.00847105								-37.2	-0.0956949	-0.170829	0.0519612	-0.153987	-0.338446		-37.2	-0.141399	0.140827	0.0629798
-35.1	0.0584	-0.01	0.0415	-0.0091	0.0212		-35.1	-0.00409	-0.00348	0.00175	-0.000403575	-0.0036								-35.1	-0.0030026	-0.00376421	0.00131658	-0.0011058	-0.00303105								-35.1	-0.107511	-0.139663	0.0382916	-0.0236754	-0.1211		-35.1	-0.0707316	0.0754016	0.0337206
-33	0.0617	-0.0081	0.0406	-0.0058	0.026		-33	-0.000725893	-0.00154	0.000877497	0.00298	0.00124								-33	0.000361511	-0.00182421	0.000444076	0.00227777	0.00180895								-33	0.0129442	-0.0676834	0.0129156	0.0487674	0.0722733		-33	0.0158434	0.0530614	0.0237298
-30.9	0.0624	-0.0065	0.0419	-0.0064	0.0341		-30.9	4.14571e-05	0.000103126	0.00221	0.00247	0.00938								-30.9	0.00112886	-0.000181088	0.00177658	0.00176777	0.00994895								-30.9	0.0404199	-0.00671888	0.0516704	0.0378482	0.397493		-30.9	0.104142	0.165494	0.0740113
-28.8	0.0598	-0.0057	0.0426	-0.0059	0.0293		-28.8	-0.00249	0.000942667	0.00293	0.00305	0.00462								-28.8	-0.0014026	0.000658453	0.00249658	0.00234777	0.00518895								-28.8	-0.0502213	0.0244304	0.072611	0.0502661	0.207315		-28.8	0.0608803	0.0940288	0.0420509
-26.7	0.0608	-0.0078	0.0419	-0.0067	0.0288		-26.7	-0.00142	-0.00112	0.00226	0.00233	0.00417								-26.7	-0.000332596	-0.00140421	0.00182658	0.00162777	0.00473895								-26.7	-0.0119089	-0.0521003	0.0531246	0.0348508	0.189336		-26.7	0.0426605	0.0917084	0.0410132
-24.6	0.0614	-0.0056	0.042	-0.0023	0.0254		-24.6	-0.000756494	0.00112	0.00239	0.00682	0.000808721								-24.6	0.00033091	0.000835786	0.00195658	0.00611777	0.00137767								-24.6	0.0118485	0.03101	0.0569055	0.130982	0.0550423		-24.6	0.0571577	0.0452527	0.0202376
-22.5	0.0644	-0.0073	0.0383	-0.0036	0.0262		-22.5	0.00231	-0.000538709	-0.00128	0.0056	0.00165								-22.5	0.0033974	-0.000822923	-0.00171342	0.00489777	0.00221895								-22.5	0.121647	-0.0305328	-0.0498335	0.104862	0.0886541		-22.5	0.0469594	0.0806897	0.0360855
-20.4	0.0605	-0.0067	0.0374	-0.0055	0.0227		-20.4	-0.00152	0.000100832	-0.00216	0.00379	-0.00181								-20.4	-0.000432596	-0.000183382	-0.00259342	0.00308777	-0.00124105								-20.4	-0.0154895	-0.00680399	-0.0754275	0.0661096	-0.0495841		-20.4	-0.0162391	0.0535865	0.0239646
-18.3	0.0598	-0.0087	0.0406	-0.0093	0.0185		-18.3	-0.00215	-0.00186	0.00107	7.29814e-05	-0.00596								-18.3	-0.0010626	-0.00214421	0.000636579	-0.000629248	-0.00539105								-18.3	-0.0380473	-0.0795563	0.0185144	-0.0134723	-0.21539		-18.3	-0.0655903	0.0910818	0.040733
-16.2	0.0612	-0.0058	0.0387	-0.0127	0.0171		-16.2	-0.000687095	0.00108	-0.000799976	-0.00324	-0.00732								-16.2	0.000400309	0.000795786	-0.0012334	-0.00394223	-0.00675105								-16.2	0.0143334	0.0295259	-0.0358723	-0.0844036	-0.269727		-16.2	-0.0692286	0.120704	0.0539803
-14.1	0.0624	-0.0071	0.0379	-0.0091	0.0201		-14.1	0.000580254	-0.000180544	-0.00157	0.000442121	-0.00428								-14.1	0.00166766	-0.000464758	-0.00200342	-0.000260108	-0.00371105								-14.1	0.0597121	-0.0172438	-0.0582679	-0.00556894	-0.148269		-14.1	-0.0339274	0.0766767	0.0342909
-12	0.0626	-0.0076	0.0366	-0.0095	0.0256		-12	0.000847604	-0.000641003	-0.00284	0.00012669	0.00126								-12	0.00193501	-0.000925217	-0.00327342	-0.000575539	0.00182895								-12	0.0692848	-0.0343281	-0.0952048	-0.0123224	0.0730724		-12	0.000100376	0.0716487	0.0320423
-9.9	0.0609	-0.004	0.0364	-0.012	0.0302		-9.9	-0.000785046	0.003	-0.00302	-0.00229	0.0059								-9.9	0.000302358	0.00271579	-0.00345342	-0.00299223	0.00646895								-9.9	0.0108262	0.100763	-0.10044	-0.064064	0.258455		-9.9	0.0411082	0.143886	0.0643477
-7.8	0.0626	-0.0036	0.0372	-0.0107	0.0269		-7.8	0.000982303	0.00343	-0.00219	-0.000904171	0.00265								-7.8	0.00206971	0.00314579	-0.00262342	-0.0016064	0.00321895								-7.8	0.0741078	0.116717	-0.0763001	-0.0343932	0.128607		-7.8	0.0417479	0.0921208	0.0411977
-5.7	0.0619	-0.0105	0.0397	-0.0099	0.0249		-5.7	0.000349653	-0.00345	0.000337008	-1.96013e-05	0.000689184								-5.7	0.00143706	-0.00373421	-9.64128e-05	-0.00072183	0.00125813								-5.7	0.0514552	-0.13855	-0.00280409	-0.0154545	0.0502664		-5.7	-0.0110173	0.0774761	0.0346484
-3.6	0.0595	-0.0094	0.0402	-0.0093	0.0206		-3.6	-0.00198	-0.00233	0.00086357	0.000664968	-0.00357								-3.6	-0.000892596	-0.00261421	0.000430149	-3.72609e-05	-0.00300105								-3.6	-0.0319603	-0.0969946	0.0125105	-0.000797761	-0.119902		-3.6	-0.0474288	0.0585567	0.0261874
-1.5	0.0642	-0.0062	0.0408	-0.0101	0.0228		-1.5	0.00278	0.000885986	0.00149	-5.04622e-05	-0.00133								-1.5	0.0038674	0.000601772	0.00105658	-0.000752691	-0.000761053								-1.5	0.138476	0.0223274	0.0307297	-0.0161152	-0.0304066		-1.5	0.0290023	0.0663269	0.0296623
0.6	0.0776	0.0083	0.0587	0.011	0.0386		0.6	0.01623	0.01541	0.01942	0.02111	0.01438								0.6	0.0173174	0.0151258	0.0189866	0.0204078	0.0149489								0.6	0.620066	0.561209	0.552209	0.436933	0.597259		0.6	0.553535	0.0707016	0.0316187
2.7	0.0824	0.0156	0.0706	0.0255	0.0417		2.7	0.02107	0.02272	0.03134	0.03568	0.01737								2.7	0.0221574	0.0224358	0.0309066	0.0349778	0.0179389								2.7	0.793367	0.83243	0.898893	0.748879	0.716719		2.7	0.798058	0.0714243	0.0319419
4.8	0.0834	0.0159	0.0713	0.0287	0.0456		4.8	0.02211	0.02304	0.03207	0.03894	0.02116								4.8	0.0231974	0.0227558	0.0316366	0.0382378	0.0217289								4.8	0.830605	0.844303	0.920124	0.818676	0.868142		4.8	0.85637	0.0401045	0.0179353
6.9	0.0873	0.0229	0.0752	0.0336	0.0479		6.9	0.02605	0.03006	0.036	0.0439	0.02336								6.9	0.0271374	0.0297758	0.0355666	0.0431978	0.0239289								6.9	0.971681	1.10476	1.03443	0.92487	0.956039		6.9	0.998356	0.071635	0.0320361
9	0.0828	0.024	0.0764	0.0372	0.054		9	0.0216	0.03118	0.03722	0.04756	0.02935								9	0.0226874	0.0308958	0.0367866	0.0468578	0.0299189								9	0.812344	1.14632	1.06991	1.00323	1.19536		9	1.04543	0.149471	0.0668455
11.1	0.0854	0.0262	0.0791	0.0405	0.0563		11.1	0.02424	0.0334	0.03995	0.05092	0.03154								11.1	0.0253274	0.0331158	0.0395166	0.0502178	0.0321089								11.1	0.906872	1.22869	1.14931	1.07517	1.28286		11.1	1.12858	0.14685	0.0656734
13.2	0.0815	0.0227	0.079	0.0381	0.0559		13.2	0.02038	0.02992	0.03988	0.04859	0.03103								13.2	0.0214674	0.0296358	0.0394466	0.0478878	0.0315989								13.2	0.768661	1.09957	1.14727	1.02528	1.26248		13.2	1.06065	0.184569	0.0825416
15.3	0.0842	0.0186	0.0791	0.0412	0.0544		15.3	0.02312	0.02584	0.04	0.05175	0.02943								15.3	0.0242074	0.0255558	0.0395666	0.0510478	0.0299989								15.3	0.866769	0.948191	1.15076	1.09294	1.19856		15.3	1.05144	0.139637	0.0624474
17.4	0.0861	0.0199	0.0772	0.0405	0.0569		17.4	0.02506	0.02716	0.03813	0.05111	0.03182								17.4	0.0261474	0.0268758	0.0376966	0.0504078	0.0323889								17.4	0.936233	0.997167	1.09637	1.07924	1.29404		17.4	1.08061	0.135658	0.0606679
19.5	0.0857	0.0159	0.078	0.0381	0.0552		19.5	0.0247	0.02318	0.03896	0.04877	0.03001								19.5	0.0257874	0.0228958	0.0385266	0.0480678	0.0305789								19.5	0.923343	0.849498	1.12051	1.02914	1.22173		19.5	1.02884	0.149084	0.0666722
21.6	0.0835	0.0114	0.0766	0.0312	0.0555		21.6	0.02254	0.0187	0.03758	0.04193	0.03021								21.6	0.0236274	0.0184158	0.0371466	0.0412278	0.0307789								21.6	0.846002	0.683277	1.08038	0.882692	1.22972		21.6	0.944414	0.213057	0.0952818
23.7	0.0851	0.0183	0.0759	0.0347	0.0527		23.7	0.02418	0.02562	0.03691	0.0455	0.0273								23.7	0.0252674	0.0253358	0.0364766	0.0447978	0.0278689								23.7	0.904724	0.940028	1.06089	0.959126	1.11346		23.7	0.995645	0.0877922	0.0392619
25.8	0.0894	0.0245	0.0738	0.042	0.0504		25.8	0.02853	0.03184	0.03484	0.05286	0.02489								25.8	0.0296174	0.0315558	0.0344066	0.0521578	0.0254589								25.8	1.06048	1.17081	1.00069	1.1167	1.01717		25.8	1.07317	0.0706743	0.0316065
27.9	0.0886	0.0254	0.0708	0.0442	0.056		27.9	0.02777	0.03276	0.03186	0.05512	0.03038								27.9	0.0288574	0.0324758	0.0314266	0.0544178	0.0309489								27.9	1.03327	1.20494	0.914017	1.16509	1.23651		27.9	1.11077	0.134489	0.0601451
30	0.0886	0.0314	0.0729	0.0423	0.0592		30	0.02781	0.03878	0.03399	0.05328	0.03348								30	0.0288974	0.0384958	0.0335566	0.0525778	0.0340489								30	1.0347	1.4283	0.975966	1.1257	1.36037		30	1.18501	0.199844	0.0893732
32.1	0.0881	0.0288	0.0727	0.0393	0.0536		32.1	0.02735	0.0362	0.03382	0.05034	0.02777								32.1	0.0284374	0.0359158	0.0333866	0.0496378	0.0283389								32.1	1.01823	1.33258	0.971022	1.06275	1.13223		32.1	1.10336	0.14123	0.0631599
34.2	0.0861	0.0234	0.0749	0.039	0.0492		34.2	0.02539	0.03082	0.03604	0.05011	0.02326								34.2	0.0264774	0.0305358	0.0356066	0.0494078	0.0238289								34.2	0.948049	1.13296	1.03559	1.05783	0.952044		34.2	1.02529	0.0776037	0.0347054
36.3	0.0891	0.0178	0.0749	0.0373	0.045		36.3	0.02843	0.02523	0.03607	0.04847	0.01896								36.3	0.0295174	0.0249458	0.0356366	0.0477678	0.0195289								36.3	1.0569	0.925558	1.03646	1.02271	0.780245		36.3	0.964375	0.114642	0.0512694
38.4	0.0886	0.0171	0.0727	0.0355	0.0467		38.4	0.02797	0.02455	0.03389	0.04673	0.02055								38.4	0.0290574	0.0242658	0.0334566	0.0460278	0.0211189								38.4	1.04043	0.900328	0.973057	0.985461	0.843771		38.4	0.948609	0.076988	0.0344301
40.5	0.0904	0.0187	0.0734	0.0321	0.0442		40.5	0.02981	0.02617	0.03462	0.04339	0.01794								40.5	0.0308974	0.0258858	0.0341866	0.0426878	0.0185089								40.5	1.10631	0.960435	0.994289	0.913951	0.739493		40.5	0.942896	0.134037	0.0599433
42.6	0.0878	0.0181	0.0754	0.0305	0.044		42.6	0.02725	0.02559	0.03665	0.04185	0.01764								42.6	0.0283374	0.0253058	0.0362166	0.0411478	0.0182089								42.6	1.01465	0.938915	1.05333	0.880979	0.727507		42.6	0.923076	0.128084	0.0572808
44.7	0.0847	0.0198	0.0758	0.032	0.0408		44.7	0.0242	0.02731	0.03707	0.04342	0.01433								44.7	0.0252874	0.0270258	0.0366366	0.0427178	0.0148989								44.7	0.90544	1.00273	1.06555	0.914593	0.595261		44.7	0.896714	0.180979	0.0809362
46.8	0.0878	0.0241	0.075	0.0352	0.051		46.8	0.02734	0.03163	0.0363	0.04668	0.02442								46.8	0.0284274	0.0313458	0.0358666	0.0459778	0.0249889								46.8	1.01787	1.16302	1.04315	0.98439	0.99839		46.8	1.04136	0.0714969	0.0319744
48.9	0.0872	0.0267	0.0756	0.037	0.0544		48.9	0.02678	0.03425	0.03693	0.04854	0.02771								48.9	0.0278674	0.0339658	0.0364966	0.0478378	0.0282789								48.9	0.997819	1.26023	1.06147	1.02421	1.12984		48.9	1.09471	0.10499	0.0469529
51	0.0894	0.024	0.0735	0.0357	0.0584		51	0.02902	0.03157	0.03485	0.0473	0.03161								51	0.0301074	0.0312858	0.0344166	0.0465978	0.0321789								51	1.07802	1.16079	1.00098	0.997664	1.28565		51	1.10462	0.121261	0.0542295
53.1	0.0877	0.0201	0.0757	0.0362	0.0587		53.1	0.02736	0.02769	0.03708	0.04787	0.0318								53.1	0.0284474	0.0274058	0.0366466	0.0471678	0.0323689								53.1	1.01859	1.01683	1.06584	1.00987	1.29324		53.1	1.08087	0.120779	0.0540141
55.2	0.0872	0.0136	0.0752	0.0378	0.0538		55.2	0.0269	0.02121	0.03661	0.04953	0.02679								55.2	0.0279874	0.0209258	0.0361766	0.0488278	0.0273589								55.2	1.00212	0.776405	1.05217	1.04541	1.09308		55.2	0.993835	0.125754	0.0562388
57.3	0.0893	0.013	0.0747	0.0338	0.0506		57.3	0.02904	0.02063	0.03613	0.04559	0.02349								57.3	0.0301274	0.0203458	0.0356966	0.0448878	0.0240589								57.3	1.07874	0.754885	1.03821	0.961053	0.961233		57.3	0.958824	0.124783	0.0558047
59.4	0.0929	0.015	0.0736	0.0351	0.0514		59.4	0.03268	0.02265	0.03506	0.04695	0.02418								59.4	0.0337674	0.0223658	0.0346266	0.0462478	0.0247489								59.4	1.20907	0.829833	1.00709	0.990171	0.988801		59.4	1.00499	0.134923	0.0603392
61.5	0.0878	0.0135	0.0736	0.0335	0.0504		61.5	0.02762	0.02117	0.03509	0.04541	0.02307								61.5	0.0287074	0.0208858	0.0346566	0.0447078	0.0236389								61.5	1.0279	0.774921	1.00796	0.957199	0.944453		61.5	0.942486	0.0998498	0.0446542
63.6	0.0894	0.0179	0.0741	0.036	0.0471		63.6	0.02927	0.02559	0.03561	0.04798	0.01967								63.6	0.0303574	0.0253058	0.0351766	0.0472778	0.0202389								63.6	1.08698	0.938915	1.02308	1.01222	0.808612		63.6	0.973962	0.106322	0.0475488
65.7	0.0873	0.0224	0.0733	0.0378	0.0493		65.7	0.02721	0.03011	0.03484	0.04984	0.02176								65.7	0.0282974	0.0298258	0.0344066	0.0491378	0.0223289								65.7	1.01322	1.10662	1.00069	1.05205	0.892114		65.7	1.01294	0.0791428	0.0353937
67.8	0.0899	0.0224	0.0738	0.042	0.0549		67.8	0.02985	0.03013	0.03537	0.0541	0.02725								67.8	0.0309374	0.0298458	0.0349366	0.0533978	0.0278189								67.8	1.10774	1.10736	1.0161	1.14325	1.11146		67.8	1.09718	0.0477375	0.0213489
69.9	0.0865	0.0244	0.0711	0.0377	0.0594		69.9	0.02649	0.03214	0.03269	0.04986	0.03164								69.9	0.0275774	0.0318558	0.0322566	0.0491578	0.0322089								69.9	0.987435	1.18194	0.938156	1.05247	1.28685		69.9	1.08937	0.14334	0.0641037
72	0.0862	0.0236	0.07	0.0343	0.0555		72	0.02623	0.03136	0.03162	0.04652	0.02764								72	0.0273174	0.0310758	0.0311866	0.0458178	0.0282089								72	0.978126	1.153	0.907036	0.980964	1.12704		72	1.02923	0.10578	0.0473063
74.1	0.0858	0.0178	0.0723	0.034	0.052		74.1	0.02587	0.02558	0.03395	0.04629	0.02403								74.1	0.0269574	0.0252958	0.0335166	0.0455878	0.0245989								74.1	0.965236	0.938544	0.974803	0.97604	0.982808		74.1	0.967486	0.0173505	0.00775936
76.2	0.0866	0.0149	0.0719	0.0338	0.048		76.2	0.02671	0.0227	0.03357	0.04615	0.01992								76.2	0.0277974	0.0224158	0.0331366	0.0454478	0.0204889								76.2	0.995313	0.831688	0.963751	0.973043	0.8186		76.2	0.916479	0.084289	0.0376952
78.3	0.0865	0.0126	0.068	0.0342	0.0484		78.3	0.02665	0.02042	0.0297	0.04661	0.02022								78.3	0.0277374	0.0201358	0.0292666	0.0459078	0.0207889								78.3	0.993164	0.747094	0.851195	0.982891	0.830586		78.3	0.880986	0.105266	0.0470762
80.4	0.0856	0.0162	0.0697	0.0305	0.05		80.4	0.0258	0.02404	0.03143	0.04297	0.02171								80.4	0.0268874	0.0237558	0.0309966	0.0422678	0.0222789								80.4	0.962729	0.881406	0.90151	0.904958	0.890116		80.4	0.908144	0.0319124	0.0142717
82.5	0.0828	0.0173	0.0693	0.0304	0.0497		82.5	0.02304	0.02516	0.03105	0.04293	0.0213								82.5	0.0241274	0.0248758	0.0306166	0.0422278	0.0218689								82.5	0.863905	0.922961	0.890458	0.904102	0.873736		82.5	0.891032	0.0235885	0.0105491
84.6	0.0805	0.0142	0.0721	0.0326	0.0501		84.6	0.02078	0.02208	0.03388	0.0452	0.0216								84.6	0.0218674	0.0217958	0.0334466	0.0444978	0.0221689								84.6	0.782983	0.808685	0.972767	0.952703	0.885722		84.6	0.880572	0.0842921	0.0376966
86.7	0.0862	0.0188	0.074	0.034	0.0509		86.7	0.02652	0.0267	0.03581	0.04666	0.02229								86.7	0.0276074	0.0264158	0.0353766	0.0459578	0.0228589								86.7	0.98851	0.980099	1.0289	0.983962	0.913289		86.7	0.978952	0.0416055	0.0186065
88.8	0.083	0.0205	0.0762	0.0358	0.0571		88.8	0.02336	0.02842	0.03803	0.04852	0.02838								88.8	0.0244474	0.0281358	0.0375966	0.0478178	0.0289489								88.8	0.875363	1.04392	1.09347	1.02378	1.1566		88.8	1.03863	0.104678	0.0468132
90.9	0.0828	0.0169	0.0785	0.0322	0.0555		90.9	0.0232	0.02484	0.04036	0.04498	0.02667								90.9	0.0242874	0.0245558	0.0399266	0.0442778	0.0272389								90.9	0.869634	0.911088	1.16123	0.947993	1.08828		90.9	0.995646	0.123795	0.0553627
93	0.0824	0.014	0.0767	0.0285	0.0504		93	0.02284	0.02196	0.03859	0.04134	0.02147								93	0.0239274	0.0216758	0.0381566	0.0406378	0.0220389								93	0.856744	0.804232	1.10975	0.87006	0.880528		93	0.904263	0.118558	0.0530206
95.1	0.0865	0.0112	0.08	0.03	0.0498		95.1	0.02698	0.01918	0.04191	0.04291	0.02076								95.1	0.0280674	0.0188958	0.0414766	0.0422078	0.0213289								95.1	1.00498	0.701086	1.20631	0.903674	0.852161		95.1	0.933643	0.187788	0.0839815
97.2	0.0857	0.0102	0.0779	0.0323	0.0517		97.2	0.02622	0.0182	0.03984	0.04527	0.02255								97.2	0.0273074	0.0179158	0.0394066	0.0445678	0.0231189								97.2	0.977768	0.664726	1.14611	0.954202	0.923677		97.2	0.933296	0.173152	0.0774359
99.3	0.0883	0.0084	0.0783	0.0287	0.0545		99.3	0.02887	0.01642	0.04027	0.04173	0.02525								99.3	0.0299574	0.0161358	0.0398366	0.0410278	0.0258189								99.3	1.07265	0.598683	1.15861	0.87841	1.03155		99.3	0.947982	0.220081	0.0984234
101.4	0.0888	0.0114	0.0759	0.0262	0.0584		101.4	0.02941	0.01944	0.03789	0.03929	0.02904								101.4	0.0304974	0.0191558	0.0374566	0.0385878	0.0296089								101.4	1.09199	0.710733	1.08939	0.826169	1.18297		101.4	0.980252	0.201169	0.0899653
103.5	0.0881	0.0152	0.0735	0.026	0.059		103.5	0.02875	0.02326	0.03552	0.03916	0.02953								103.5	0.0298374	0.0229758	0.0350866	0.0384578	0.0300989								103.5	1.06836	0.852466	1.02046	0.823386	1.20255		103.5	0.993445	0.157212	0.0703073
105.6	0.0864	0.0191	0.0736	0.0315	0.0559		105.6	0.02709	0.02717	0.03564	0.04472	0.02632								105.6	0.0281774	0.0268858	0.0352066	0.0440178	0.0268889								105.6	1.00892	0.997538	1.02395	0.942426	1.0743		105.6	1.00943	0.0475668	0.0212725
107.7	0.0873	0.0237	0.0744	0.0305	0.0607		107.7	0.02803	0.03179	0.03647	0.04378	0.03102								107.7	0.0291174	0.0315058	0.0360366	0.0430778	0.0315889								107.7	1.04258	1.16895	1.04809	0.922301	1.26208		107.7	1.0888	0.130352	0.0582951
109.8	0.09	0.0209	0.0711	0.0277	0.0572		109.8	0.03077	0.02901	0.0332	0.04104	0.02741								109.8	0.0318574	0.0287258	0.0327666	0.0403378	0.0279789								109.8	1.14068	1.06581	0.952989	0.863637	1.11785		109.8	1.02819	0.117092	0.052365
111.9	0.0912	0.016	0.0669	0.0265	0.0499		111.9	0.03201	0.02413	0.02902	0.0399	0.02								111.9	0.0330974	0.0238458	0.0285866	0.0391978	0.0205689								111.9	1.18508	0.884745	0.831417	0.839229	0.821796		111.9	0.912455	0.154307	0.0690082
114	0.0881	0.0143	0.0698	0.0313	0.0469		114	0.02895	0.02245	0.03195	0.04477	0.0169								114	0.0300374	0.0221658	0.0315166	0.0440678	0.0174689								114	1.07552	0.822413	0.916634	0.943497	0.697941		114	0.891201	0.140922	0.0630221
116.1	0.0878	0.0152	0.0676	0.0316	0.048		116.1	0.0287	0.02337	0.02978	0.04513	0.01789								116.1	0.0297874	0.0230858	0.0293466	0.0444278	0.0184589								116.1	1.06657	0.856547	0.853521	0.951204	0.737495		116.1	0.893067	0.123067	0.0550374
118.2	0.0884	0.0126	0.0712	0.0305	0.0515		118.2	0.02934	0.02079	0.0334	0.04409	0.02128								118.2	0.0304274	0.0205058	0.0329666	0.0433878	0.0218489								118.2	1.08948	0.760822	0.958806	0.928938	0.872937		118.2	0.922197	0.120248	0.0537767
120.3	0.0841	0.0117	0.0709	0.0279	0.0541		120.3	0.02508	0.01991	0.03313	0.04155	0.02378								120.3	0.0261674	0.0196258	0.0326966	0.0408478	0.0243489								120.3	0.936949	0.728171	0.950953	0.874556	0.97282		120.3	0.89269	0.0989564	0.0442546
122.4	0.0837	0.012	0.0719	0.0251	0.0533		122.4	0.02472	0.02023	0.03416	0.03881	0.02287								122.4	0.0258074	0.0199458	0.0337266	0.0381078	0.0234389								122.4	0.924059	0.740044	0.98091	0.815892	0.936462		122.4	0.879474	0.0987522	0.0441633
124.5	0.0854	0.014	0.0697	0.0243	0.0544		124.5	0.02646	0.02225	0.03198	0.03808	0.02386								124.5	0.0275474	0.0219658	0.0315466	0.0373778	0.0244289								124.5	0.986361	0.814992	0.917507	0.800263	0.976016		124.5	0.899028	0.0876246	0.0391869
126.6	0.0833	0.0178	0.0686	0.0249	0.0554		126.6	0.0244	0.02607	0.03091	0.03874	0.02475								126.6	0.0254874	0.0257858	0.0304766	0.0380378	0.0253189								126.6	0.912601	0.956725	0.886387	0.814394	1.01157		126.6	0.916336	0.07417	0.0331698
128.7	0.0857	0.018	0.0691	0.0226	0.0562		128.7	0.02684	0.02629	0.03144	0.0365	0.02545								128.7	0.0279274	0.0260058	0.0310066	0.0357978	0.0260189								128.7	0.999967	0.964887	0.901801	0.766435	1.03954		128.7	0.934526	0.106722	0.0477274
130.8	0.0873	0.0157	0.0709	0.0229	0.0533		130.8	0.02848	0.02401	0.03326	0.03686	0.02244								130.8	0.0295674	0.0237258	0.0328266	0.0361578	0.0230089								130.8	1.05869	0.880293	0.954734	0.774143	0.919282		130.8	0.917428	0.103995	0.0465079
132.9	0.0848	0.0136	0.0756	0.0251	0.0499		132.9	0.02602	0.02193	0.03799	0.03912	0.01893								132.9	0.0271074	0.0216458	0.0375566	0.0384178	0.0194989								132.9	0.970607	0.803119	1.0923	0.822529	0.779046		132.9	0.893521	0.133952	0.0599054
135	0.0823	0.011	0.0708	0.0259	0.051		135	0.02357	0.01935	0.03322	0.03999	0.01993								135	0.0246574	0.0190658	0.0327866	0.0392878	0.0204989								135	0.882882	0.707394	0.953571	0.841156	0.819		135	0.840801	0.0904997	0.0404727
137.1	0.0831	0.01	0.0708	0.0256	0.0519		137.1	0.02441	0.01837	0.03324	0.03975	0.02072								137.1	0.0254974	0.0180858	0.0328066	0.0390478	0.0212889								137.1	0.912959	0.671033	0.954153	0.836018	0.850563		137.1	0.844945	0.108292	0.0484298
139.2	0.0797	0.0105	0.0698	0.025	0.0541		139.2	0.02105	0.01888	0.03227	0.03921	0.02281								139.2	0.0221374	0.0185958	0.0318366	0.0385078	0.0233789								139.2	0.792651	0.689956	0.925941	0.824456	0.934065		139.2	0.833414	0.10126	0.0452847
141.3	0.0819	0.0105	0.0663	0.0264	0.0559		141.3	0.02329	0.0189	0.0288	0.04067	0.02451								141.3	0.0243774	0.0186158	0.0283666	0.0399678	0.0250789								141.3	0.872856	0.690698	0.825019	0.855715	1.00199		141.3	0.849255	0.111415	0.0498263
143.4	0.0833	0.0106	0.0679	0.0264	0.0502		143.4	0.02473	0.01902	0.03042	0.04073	0.0187								143.4	0.0258174	0.0187358	0.0299866	0.0400278	0.0192689								143.4	0.924417	0.69515	0.872135	0.857	0.769857		143.4	0.823712	0.090861	0.0406343
145.5	0.0865	0.0131	0.069	0.0277	0.0505		145.5	0.02797	0.02154	0.03155	0.0421	0.01889								145.5	0.0290574	0.0212558	0.0311166	0.0413978	0.0194589								145.5	1.04043	0.788649	0.905	0.886332	0.777448		145.5	0.879572	0.106376	0.0475727
147.6	0.0869	0.0167	0.0662	0.0286	0.0469		147.6	0.02841	0.02516	0.02878	0.04306	0.01518								147.6	0.0294974	0.0248758	0.0283466	0.0423578	0.0157489								147.6	1.05618	0.922961	0.824437	0.906885	0.629222		147.6	0.867938	0.157209	0.0703059
149.7	0.0878	0.0176	0.0648	0.0241	0.0479		149.7	0.02935	0.02608	0.0274	0.03862	0.01608								149.7	0.0304374	0.0257958	0.0269666	0.0379178	0.0166489								149.7	1.08984	0.957096	0.784301	0.811824	0.66518		149.7	0.861648	0.164504	0.0735686
151.8	0.0862	0.0151	0.0645	0.0226	0.0487		151.8	0.02779	0.0236	0.02713	0.03718	0.01677								151.8	0.0288774	0.0233158	0.0266966	0.0364778	0.0173389								151.8	1.03398	0.865081	0.776448	0.780994	0.692747		151.8	0.829851	0.129371	0.0578564
153.9	0.085	0.0086	0.0671	0.0207	0.0441		153.9	0.02664	0.01712	0.02976	0.03535	0.01206								153.9	0.0277274	0.0168358	0.0293266	0.0346478	0.0126289								153.9	0.992806	0.624655	0.85294	0.741813	0.504568		153.9	0.743356	0.190622	0.0852486
156	0.0859	0.0107	0.0658	0.0257	0.0437		156	0.02758	0.01924	0.02848	0.04041	0.01156								156	0.0286674	0.0189558	0.0280466	0.0397078	0.0121289								156	1.02646	0.703313	0.815712	0.850149	0.484591		156	0.776046	0.200006	0.0894455
158.1	0.0834	0.0084	0.0652	0.0216	0.0445		158.1	0.02512	0.01696	0.02791	0.03637	0.01225								158.1	0.0262074	0.0166758	0.0274766	0.0356678	0.0128189								158.1	0.938381	0.618718	0.799134	0.763652	0.512159		158.1	0.726409	0.165158	0.0738609
160.2	0.0855	0.0137	0.0676	0.0208	0.0528		160.2	0.02726	0.02228	0.03034	0.03563	0.02044								160.2	0.0283474	0.0219958	0.0299066	0.0349278	0.0210089								160.2	1.01501	0.816105	0.869809	0.747808	0.839376		160.2	0.857621	0.098785	0.044178
162.3	0.0806	0.0108	0.0661	0.021	0.0487		162.3	0.0224	0.0194	0.02886	0.03589	0.01623								162.3	0.0234874	0.0191158	0.0284266	0.0351878	0.0167989								162.3	0.840989	0.709249	0.826764	0.753375	0.671173		162.3	0.76031	0.0733588	0.032807
164.4	0.0786	0.0136	0.0685	0.0273	0.05		164.4	0.02044	0.02222	0.03129	0.04226	0.01743								164.4	0.0215274	0.0219358	0.0308566	0.0415578	0.0179989								164.4	0.770809	0.813879	0.897439	0.889757	0.719117		164.4	0.8182	0.076618	0.0342646
166.5	0.0827	0.0142	0.0677	0.026	0.0494		166.5	0.02458	0.02284	0.03052	0.04102	0.01672								166.5	0.0256674	0.0225558	0.0300866	0.0403178	0.0172889								166.5	0.919046	0.836883	0.875044	0.863209	0.69075		166.5	0.836986	0.0869697	0.038894
168.6	0.0834	0.0135	0.0638	0.0222	0.0514		168.6	0.02532	0.02216	0.02664	0.03728	0.01861								168.6	0.0264074	0.0218758	0.0262066	0.0365778	0.0191789								168.6	0.945542	0.811653	0.762197	0.783135	0.766261		168.6	0.813758	0.0761968	0.0340762
170.7	0.0819	0.0128	0.0637	0.0181	0.0527		170.7	0.02387	0.02148	0.02657	0.03324	0.01981								170.7	0.0249574	0.0211958	0.0261366	0.0325378	0.0203789								170.7	0.893624	0.786423	0.760161	0.696638	0.814205		170.7	0.79021	0.0723588	0.0323598
172.8	0.0788	0.0079	0.0622	0.0157	0.0476		172.8	0.02081	0.01659	0.02509	0.0309	0.0146								172.8	0.0218974	0.0163058	0.0246566	0.0301978	0.0151689								172.8	0.784058	0.60499	0.717117	0.646538	0.606049		172.8	0.67175	0.0775891	0.0346989
174.9	0.0799	0.0067	0.0683	0.0185	0.0431		174.9	0.02195	0.01541	0.03122	0.03377	0.00999								174.9	0.0230374	0.0151258	0.0307866	0.0330678	0.0105589								174.9	0.824876	0.561209	0.895403	0.707985	0.421864		174.9	0.682267	0.192932	0.0862816
177	0.083	0.0087	0.068	0.0172	0.045		177	0.02509	0.01743	0.03095	0.03253	0.01179								177	0.0261774	0.0171458	0.0305166	0.0318278	0.0123589								177	0.937307	0.636157	0.88755	0.681437	0.49378		177	0.727246	0.183525	0.0820747
179.1	0.0823	0.0059	0.0667	0.0198	0.0494		179.1	0.02443	0.01465	0.02967	0.03519	0.01608								179.1	0.0255174	0.0143658	0.0292366	0.0344878	0.0166489								179.1	0.913675	0.533011	0.850322	0.738388	0.66518		179.1	0.740115	0.150648	0.0673718
181.2	0.0778	0.0051	0.0681	0.0216	0.0535		181.2	0.01997	0.01387	0.0311	0.03705	0.02007								181.2	0.0210574	0.0135858	0.0306666	0.0363478	0.0206389								181.2	0.753981	0.504071	0.891913	0.778211	0.824593		181.2	0.750553	0.147474	0.0659525
183.3	0.0777	0.005	0.0658	0.0265	0.0538		183.3	0.01991	0.01379	0.02883	0.04201	0.02026								183.3	0.0209974	0.0135058	0.0283966	0.0413078	0.0208289								183.3	0.751832	0.501102	0.825891	0.884405	0.832184		183.3	0.759083	0.151756	0.0678673
185.4	0.0769	0.0091	0.0652	0.0307	0.0549		185.4	0.01915	0.01791	0.02825	0.04628	0.02126								185.4	0.0202374	0.0176258	0.0278166	0.0455778	0.0218289								185.4	0.72462	0.653966	0.809023	0.975826	0.872137		185.4	0.807114	0.125454	0.0561049
187.5	0.0787	0.0113	0.0635	0.0278	0.0551		187.5	0.02099	0.02013	0.02658	0.04344	0.02135								187.5	0.0220774	0.0198458	0.0261466	0.0427378	0.0219189								187.5	0.790503	0.736334	0.760452	0.915021	0.875733		187.5	0.815609	0.0765749	0.0342453
189.6	0.0816	0.0119	0.0611	0.0233	0.0544		189.6	0.02394	0.02075	0.02421	0.039	0.02054								189.6	0.0250274	0.0204658	0.0237766	0.0382978	0.0211089								189.6	0.89613	0.759338	0.691523	0.81996	0.843371		189.6	0.802064	0.0789303	0.0352987
191.7	0.0836	0.0088	0.0608	0.0167	0.0505		191.7	0.02598	0.01767	0.02393	0.03246	0.01654								191.7	0.0270674	0.0173858	0.0234966	0.0317578	0.0171089								191.7	0.969174	0.645061	0.683379	0.679938	0.683558		191.7	0.732222	0.133446	0.0596787
193.8	0.0812	0.0058	0.0601	0.0165	0.0443		193.8	0.02362	0.01469	0.02326	0.03232	0.01023								193.8	0.0247074	0.0144058	0.0228266	0.0316178	0.0107989								193.8	0.884672	0.534495	0.663893	0.676941	0.431453		193.8	0.638291	0.170593	0.0762917
195.9	0.0815	0.0035	0.0597	0.0185	0.0392		195.9	0.02396	0.01241	0.02289	0.03439	0.00502								195.9	0.0250474	0.0121258	0.0224566	0.0336878	0.00558895								195.9	0.896846	0.449901	0.653131	0.72126	0.223297		195.9	0.588887	0.259549	0.116074
198	0.0788	0.0036	0.0588	0.0199	0.0399		198	0.0213	0.01253	0.02201	0.03585	0.00562								198	0.0223874	0.0122458	0.0215766	0.0351478	0.00618895								198	0.801602	0.454353	0.627537	0.752518	0.247269		198	0.576656	0.2278	0.101875
200.1	0.0786	0.0057	0.0599	0.022	0.0419		200.1	0.02114	0.01465	0.02314	0.03801	0.00751								200.1	0.0222274	0.0143658	0.0227066	0.0373078	0.00807895								200.1	0.795873	0.533011	0.660402	0.798764	0.32278		200.1	0.622166	0.200252	0.0895555
202.2	0.0776	0.0057	0.0612	0.0222	0.05		202.2	0.02018	0.01467	0.02447	0.03827	0.0155								202.2	0.0212674	0.0143858	0.0240366	0.0375678	0.0160689								202.2	0.7615	0.533753	0.699084	0.804331	0.642007		202.2	0.688135	0.106025	0.0474159
204.3	0.0764	0.0041	0.0607	0.0202	0.0494		204.3	0.01902	0.01309	0.02399	0.03634	0.01479								204.3	0.0201074	0.0128058	0.0235566	0.0356378	0.0153589								204.3	0.719965	0.47513	0.685124	0.763009	0.61364		204.3	0.651374	0.112685	0.0503944
206.4	0.0766	0.005	0.0626	0.0233	0.0483		206.4	0.01926	0.014	0.02592	0.0395	0.01359								206.4	0.0203474	0.0137158	0.0254866	0.0387978	0.0141589								206.4	0.728558	0.508894	0.741256	0.830665	0.565696		206.4	0.675014	0.133256	0.0595939
208.5	0.0759	0.007	0.0622	0.0187	0.0534		208.5	0.01861	0.01602	0.02555	0.03496	0.01858								208.5	0.0196974	0.0157358	0.0251166	0.0342578	0.0191489								208.5	0.705284	0.583842	0.730495	0.733463	0.765063		208.5	0.703629	0.0702456	0.0314148
210.6	0.0766	0.0044	0.0624	0.0157	0.049		210.6	0.01935	0.01344	0.02577	0.03202	0.01407								210.6	0.0204374	0.0131558	0.0253366	0.0313178	0.0146389								210.6	0.731781	0.488116	0.736894	0.670518	0.584874		210.6	0.642436	0.105855	0.0473399
212.7	0.0749	0.0034	0.0609	0.0156	0.0454		212.7	0.01769	0.01246	0.0243	0.03198	0.01037								212.7	0.0187774	0.0121758	0.0238666	0.0312778	0.0109389								212.7	0.672343	0.451756	0.69414	0.669661	0.437047		212.7	0.584989	0.128795	0.0575987
214.8	0.0738	0.0017	0.062	0.0187	0.0436		214.8	0.01663	0.01078	0.02543	0.03515	0.00846								214.8	0.0177174	0.0104958	0.0249966	0.0344478	0.00902895								214.8	0.634389	0.389423	0.727005	0.737531	0.360736		214.8	0.569817	0.182526	0.081628
216.9	0.0758	0.003	0.0658	0.0201	0.0483		216.9	0.01867	0.0121	0.02925	0.03661	0.01305								216.9	0.0197574	0.0118158	0.0288166	0.0359078	0.0136189								216.9	0.707433	0.438399	0.838107	0.76879	0.544121		216.9	0.65937	0.164575	0.0736004
219	0.0783	0.004	0.0612	0.02	0.0541		219	0.02121	0.01312	0.02468	0.03657	0.01875								219	0.0222974	0.0128358	0.0242466	0.0358678	0.0193189								219	0.79838	0.476243	0.705192	0.767934	0.771855		219	0.703921	0.131789	0.058938
221.1	0.0734	0.0066	0.0624	0.0165	0.0543		221.1	0.01635	0.01574	0.02591	0.03313	0.01884								221.1	0.0174374	0.0154558	0.0254766	0.0324278	0.0194089								221.1	0.624363	0.573453	0.740966	0.694283	0.775451		221.1	0.681703	0.0828627	0.0370573
223.2	0.0759	0.0076	0.0607	0.0202	0.0531		223.2	0.01889	0.01676	0.02423	0.03689	0.01753								223.2	0.0199774	0.0164758	0.0237966	0.0361878	0.0180989								223.2	0.71531	0.611298	0.692104	0.774785	0.723112		223.2	0.703322	0.0596586	0.0266802
225.3	0.0779	0.008	0.0572	0.0217	0.0474		225.3	0.02094	0.01718	0.02076	0.03846	0.01172								225.3	0.0220274	0.0168958	0.0203266	0.0377578	0.0122889								225.3	0.788712	0.626881	0.591182	0.808399	0.490983		225.3	0.661231	0.135075	0.0604073
227.4	0.0757	0.009	0.0572	0.022	0.0487		227.4	0.01878	0.0182	0.02079	0.03882	0.01292								227.4	0.0198674	0.0179158	0.0203566	0.0381178	0.0134889								227.4	0.711371	0.664726	0.592055	0.816106	0.538927		227.4	0.664637	0.107469	0.0480615
229.5	0.0774	0.01	0.0577	0.0191	0.0445		229.5	0.02052	0.01922	0.02131	0.03598	0.00861								229.5	0.0216074	0.0189358	0.0208766	0.0352778	0.00917895								229.5	0.773674	0.702571	0.607178	0.755302	0.366729		229.5	0.641091	0.166453	0.0744401
231.6	0.0786	0.0088	0.0567	0.0176	0.0433		231.6	0.02176	0.01804	0.02034	0.03454	0.0073								231.6	0.0228474	0.0177558	0.0199066	0.0338378	0.00786895								231.6	0.818073	0.658789	0.578967	0.724471	0.31439		231.6	0.618938	0.191525	0.0856526
233.7	0.0778	0.0036	0.056	0.0209	0.0394		233.7	0.021	0.01286	0.01967	0.0379	0.0033								233.7	0.0220874	0.0125758	0.0192366	0.0371978	0.00386895								233.7	0.790861	0.466597	0.55948	0.796409	0.154577		233.7	0.553585	0.265552	0.118759
235.8	0.0797	0.0036	0.0554	0.0204	0.0444		235.8	0.02294	0.01288	0.01909	0.03747	0.00819								235.8	0.0240274	0.0125958	0.0186566	0.0367678	0.00875895								235.8	0.860324	0.467339	0.542611	0.787203	0.349948		235.8	0.601485	0.215767	0.0964937
237.9	0.0767	0.0034	0.0572	0.0194	0.0499		237.9	0.01998	0.0127	0.02092	0.03653	0.01358								237.9	0.0210674	0.0124158	0.0204866	0.0358278	0.0141489								237.9	0.754339	0.46066	0.595836	0.767077	0.565296		237.9	0.628642	0.130643	0.0584255
240	0.0781	0.0091	0.0538	0.0186	0.0502		240	0.02142	0.01841	0.01754	0.03579	0.01377								240	0.0225074	0.0181258	0.0171066	0.0350878	0.0143389								240	0.805899	0.672517	0.497531	0.751234	0.572888		240	0.660014	0.126245	0.0564587
242.1	0.0747	0.0102	0.0558	0.0149	0.0469		242.1	0.01806	0.01953	0.01957	0.03215	0.01037								242.1	0.0191474	0.0192458	0.0191366	0.0314478	0.0109389								242.1	0.685591	0.714072	0.556572	0.673301	0.437047		242.1	0.613317	0.115396	0.0516065
244.2	0.0757	0.0079	0.0579	0.0165	0.0459		244.2	0.01911	0.01725	0.0217	0.03382	0.00926								244.2	0.0201974	0.0169658	0.0212666	0.0331178	0.00982895								244.2	0.723187	0.629478	0.618521	0.709056	0.392698		244.2	0.614588	0.132467	0.0592411
246.3	0.0741	0.0078	0.0587	0.0179	0.0433		246.3	0.01755	0.01717	0.02252	0.03528	0.00655								246.3	0.0186374	0.0168858	0.0220866	0.0345778	0.00711895								246.3	0.66733	0.62651	0.64237	0.740315	0.284425		246.3	0.59219	0.177484	0.0793732
248.4	0.08	0.0058	0.0571	0.0156	0.0443		248.4	0.02349	0.01519	0.02095	0.03304	0.00745								248.4	0.0245774	0.0149058	0.0205166	0.0323378	0.00801895								248.4	0.880017	0.553046	0.596708	0.692356	0.320383		248.4	0.608502	0.204315	0.0913726
250.5	0.0785	0.0044	0.0597	0.0188	0.0421		250.5	0.02203	0.01381	0.02358	0.0363	0.00514								250.5	0.0231174	0.0135258	0.0231466	0.0355978	0.00570895								250.5	0.827741	0.501844	0.673199	0.762153	0.228091		250.5	0.598606	0.240551	0.107578
252.6	0.0773	0.004	0.0608	0.0173	0.045		252.6	0.02087	0.01343	0.0247	0.03486	0.00793								252.6	0.0219574	0.0131458	0.0242666	0.0341578	0.00849895								252.6	0.786206	0.487745	0.705774	0.731322	0.339561		252.6	0.610122	0.189092	0.0845647
254.7	0.0762	-0.0031	0.0616	0.0191	0.0451		254.7	0.01981	0.00635	0.02553	0.03673	0.00793								254.7	0.0208974	0.00606579	0.0250966	0.0360278	0.00849895								254.7	0.748252	0.225058	0.729914	0.771359	0.339561		254.7	0.562829	0.259674	0.11613
256.8	0.0769	0.0022	0.0616	0.0223	0.0493		256.8	0.02055	0.01167	0.02556	0.03999	0.01202								256.8	0.0216374	0.0113858	0.0251266	0.0392878	0.0125889								256.8	0.774748	0.422444	0.730786	0.841156	0.502969		256.8	0.654421	0.181612	0.0812191
258.9	0.0761	0.004	0.062	0.018	0.0536		258.9	0.01979	0.01349	0.02598	0.03575	0.01621								258.9	0.0208774	0.0132058	0.0255466	0.0350478	0.0167789								258.9	0.747535	0.489972	0.743002	0.750377	0.670374		258.9	0.680252	0.111452	0.0498429
261	0.0751	0.0045	0.0607	0.0171	0.0472		261	0.01883	0.01401	0.02471	0.03491	0.0097								261	0.0199174	0.0137258	0.0242766	0.0342078	0.0102689								261	0.713162	0.509265	0.706065	0.732393	0.410278		261	0.614232	0.1456	0.0651144
263.1	0.0734	0.0017	0.0633	0.0191	0.0477		263.1	0.01718	0.01123	0.02734	0.03697	0.0101								263.1	0.0182674	0.0109458	0.0269066	0.0362678	0.0106689								263.1	0.654082	0.406119	0.782556	0.776498	0.426259		263.1	0.609103	0.183551	0.0820866
265.2	0.074	0.0024	0.0604	0.0279	0.0474		265.2	0.01782	0.01195	0.02446	0.04584	0.00969								265.2	0.0189074	0.0116658	0.0240266	0.0451378	0.0102589								265.2	0.676998	0.432833	0.698794	0.966406	0.409878		265.2	0.636982	0.227593	0.101783
267.3	0.0774	0.0058	0.056	0.0277	0.0462		267.3	0.02126	0.01537	0.02009	0.0457	0.00838								267.3	0.0223474	0.0150858	0.0196566	0.0449978	0.00894895								267.3	0.80017	0.559725	0.571696	0.963408	0.35754		267.3	0.650508	0.234834	0.105021
269.4	0.0749	0.0059	0.0554	0.026	0.0497		269.4	0.0188	0.01549	0.01952	0.04406	0.01178								269.4	0.0198874	0.0152058	0.0190866	0.0433578	0.0123489								269.4	0.712088	0.564177	0.555118	0.928296	0.493381		269.4	0.650612	0.174785	0.0781662
271.5	0.074	0.0047	0.0556	0.0213	0.0504		271.5	0.01794	0.01431	0.01974	0.03942	0.01237								271.5	0.0190274	0.0140258	0.0193066	0.0387178	0.0129389								271.5	0.681294	0.520396	0.561516	0.828953	0.516953		271.5	0.621822	0.133568	0.0597334
273.6	0.0744	0.0052	0.056	0.023	0.0465		273.6	0.01838	0.01482	0.02017	0.04118	0.00836								273.6	0.0194674	0.0145358	0.0197366	0.0404778	0.00892895								273.6	0.697049	0.539318	0.574022	0.866634	0.35674		273.6	0.606753	0.189616	0.0847988
275.7	0.0747	0.0007	0.052	0.0214	0.0472		275.7	0.01872	0.01034	0.0162	0.03965	0.00896								275.7	0.0198074	0.0100558	0.0157666	0.0389478	0.00952895								275.7	0.709223	0.373098	0.458558	0.833877	0.380712		275.7	0.551094	0.208714	0.0933398
277.8	0.0752	0.0047	0.053	0.0183	0.0466		277.8	0.01926	0.01436	0.01722	0.03661	0.00825								277.8	0.0203474	0.0140758	0.0167866	0.0359078	0.00881895								277.8	0.728558	0.522251	0.488224	0.76879	0.352346		277.8	0.572034	0.17391	0.0777748
279.9	0.0751	0.0058	0.0574	0.0108	0.0441		279.9	0.01921	0.01548	0.02165	0.02917	0.00564								279.9	0.0202974	0.0151958	0.0212166	0.0284678	0.00620895								279.9	0.726768	0.563806	0.617067	0.609499	0.248068		279.9	0.553041	0.180688	0.0808061
282	0.0747	0.0041	0.0597	0.0127	0.0402		282	0.01885	0.0138	0.02398	0.03113	0.00163								282	0.0199374	0.0135158	0.0235466	0.0304278	0.00219895								282	0.713878	0.501473	0.684833	0.651463	0.0878551		282	0.5279	0.25924	0.115936
284.1	0.073	0.0062	0.0624	0.0163	0.0428		284.1	0.01719	0.01592	0.0267	0.03479	0.00413								284.1	0.0182774	0.0156358	0.0262666	0.0340878	0.00469895								284.1	0.65444	0.580131	0.763942	0.729824	0.187738		284.1	0.583215	0.232186	0.103837
286.2	0.0737	0.0056	0.0616	0.0177	0.0448		286.2	0.01793	0.01534	0.02593	0.03626	0.00602								286.2	0.0190174	0.0150558	0.0254966	0.0355578	0.00658895								286.2	0.680936	0.558612	0.741547	0.761297	0.26325		286.2	0.601128	0.204762	0.0915724
288.3	0.0726	0.0043	0.059	0.0167	0.0501		288.3	0.01687	0.01406	0.02336	0.03532	0.01121								288.3	0.0179574	0.0137758	0.0229266	0.0346178	0.0117789								288.3	0.642982	0.51112	0.666801	0.741171	0.470607		288.3	0.606536	0.112547	0.0503327
290.4	0.0714	0.005	0.058	0.0205	0.0547		290.4	0.01571	0.01478	0.02238	0.03918	0.01571								290.4	0.0167974	0.0144958	0.0219466	0.0384778	0.0162789								290.4	0.601447	0.537834	0.638298	0.823814	0.650397		290.4	0.650358	0.106403	0.0475848
292.5	0.0702	0.003	0.0607	0.0248	0.0528		292.5	0.01455	0.0128	0.02511	0.04354	0.0137								292.5	0.0156374	0.0125158	0.0246766	0.0428378	0.0142689								292.5	0.559912	0.464371	0.717698	0.917162	0.570091		292.5	0.645847	0.176658	0.0790038
294.6	0.0711	-0.0028	0.0602	0.0256	0.0533		294.6	0.01549	0.00702	0.02464	0.04441	0.01409								294.6	0.0165774	0.00673579	0.0242066	0.0437078	0.0146589								294.6	0.59357	0.249916	0.704029	0.935789	0.585673		294.6	0.613795	0.247704	0.110777
296.7	0.0698	-0.0035	0.0602	0.0252	0.0515		296.7	0.01423	0.00634	0.02466	0.04407	0.01218								296.7	0.0153174	0.00605579	0.0242266	0.0433678	0.0127489								296.7	0.548454	0.224687	0.70461	0.92851	0.509362		296.7	0.583125	0.259408	0.116011
298.8	0.0704	-0.0002	0.0587	0.0266	0.0484		298.8	0.01488	0.00966	0.02319	0.04553	0.00898								298.8	0.0159674	0.00937579	0.0227566	0.0448278	0.00954895								298.8	0.571728	0.347868	0.661857	0.959768	0.381512		298.8	0.584547	0.247069	0.110493
300.9	0.0702	0.0033	0.0622	0.0195	0.0485		300.9	0.01472	0.01318	0.02672	0.03849	0.00897								300.9	0.0158074	0.0128958	0.0262866	0.0377878	0.00953895								300.9	0.565999	0.47847	0.764524	0.809041	0.381112		300.9	0.599829	0.183442	0.0820377
303	0.0677	0.0059	0.0614	0.0201	0.0462		303	0.01226	0.0158	0.02594	0.03915	0.00656								303	0.0133474	0.0155158	0.0255066	0.0384478	0.00712895								303	0.477917	0.575679	0.741838	0.823172	0.284825		303	0.580686	0.213828	0.0956269
305.1	0.0654	0.0014	0.0598	0.0213	0.0497		305.1	0.01	0.01132	0.02437	0.04042	0.00996								305.1	0.0110874	0.0110358	0.0239366	0.0397178	0.0105289								305.1	0.396995	0.409458	0.696176	0.850363	0.420666		305.1	0.554732	0.20698	0.0925643
307.2	0.0676	0.0021	0.0592	0.0266	0.0585		307.2	0.01224	0.01203	0.02379	0.04578	0.01865								307.2	0.0133274	0.0117458	0.0233566	0.0450778	0.0192189								307.2	0.4772	0.435801	0.679307	0.965121	0.767859		307.2	0.665058	0.217174	0.0971231
309.3	0.0706	0.003	0.0607	0.022	0.0536		309.3	0.01528	0.01295	0.02532	0.04124	0.01364								309.3	0.0163674	0.0126658	0.0248866	0.0405378	0.0142089								309.3	0.586051	0.469936	0.723806	0.867919	0.567694		309.3	0.643081	0.154906	0.0692761
311.4	0.0737	0.0043	0.0571	0.0201	0.0527		311.4	0.01842	0.01427	0.02175	0.0394	0.01264								311.4	0.0195074	0.0139858	0.0213166	0.0386978	0.0132089								311.4	0.698481	0.518912	0.619975	0.828524	0.52774		311.4	0.638727	0.129053	0.0577144
313.5	0.0714	0.0028	0.0572	0.0228	0.0527		313.5	0.01616	0.01279	0.02187	0.04216	0.01253								313.5	0.0172474	0.0125058	0.0214366	0.0414578	0.0130989								313.5	0.61756	0.464	0.623466	0.887616	0.523346		313.5	0.623197	0.162222	0.0725478
315.6	0.069	0.0014	0.0583	0.0202	0.0481		315.6	0.0138	0.01141	0.023	0.03963	0.00782								315.6	0.0148874	0.0111258	0.0225666	0.0389278	0.00838895								315.6	0.533058	0.412798	0.656331	0.833449	0.335166		315.6	0.55416	0.198008	0.0885517
317.7	0.0717	0.0045	0.0558	0.0208	0.0499		317.7	0.01655	0.01453	0.02053	0.04029	0.00951								317.7	0.0176374	0.0142458	0.0200966	0.0395878	0.0100789								317.7	0.631524	0.528558	0.584493	0.847579	0.402687		317.7	0.598968	0.163218	0.0729935
319.8	0.0708	0.0056	0.057	0.0155	0.0443		319.8	0.01569	0.01565	0.02175	0.03505	0.00381								319.8	0.0167774	0.0153658	0.0213166	0.0343478	0.00437895								319.8	0.600731	0.570114	0.619975	0.73539	0.174953		319.8	0.540233	0.213558	0.0955059
321.9	0.0707	0.0088	0.0585	0.0141	0.0397		321.9	0.01563	0.01887	0.02328	0.03371	-0.000899549								321.9	0.0167174	0.0185858	0.0228466	0.0330078	-0.000330602								321.9	0.598583	0.689585	0.664474	0.706701	-0.0132086		321.9	0.529227	0.306002	0.136848
324	0.0686	0.0037	0.059	0.0172	0.0413		324	0.01357	0.01379	0.02381	0.03687	0.000593419								324	0.0146574	0.0135058	0.0233766	0.0361678	0.00116237								324	0.524822	0.501102	0.679889	0.774357	0.0464403		324	0.505322	0.2801	0.125264
326.1	0.0685	0.0014	0.0571	0.0186	0.0388		326.1	0.01351	0.01151	0.02193	0.03834	-0.00201								326.1	0.0145974	0.0112258	0.0214966	0.0376378	-0.00144105								326.1	0.522674	0.416508	0.625211	0.80583	-0.0575748		326.1	0.462529	0.324254	0.145011
328.2	0.0701	0.0029	0.0578	0.0173	0.0472		328.2	0.01515	0.01303	0.02266	0.0371	0.00628								328.2	0.0162374	0.0127458	0.0222266	0.0363978	0.00684895								328.2	0.581396	0.472904	0.646442	0.779281	0.273638		328.2	0.550732	0.190508	0.0851979
330.3	0.07	0.0036	0.0574	0.0151	0.052		330.3	0.01509	0.01375	0.02229	0.03496	0.01097								330.3	0.0161774	0.0134658	0.0218566	0.0342578	0.0115389								330.3	0.579247	0.499618	0.635681	0.733463	0.461018		330.3	0.581806	0.108689	0.0486073
332.4	0.0714	0.0008	0.0597	0.0201	0.0498		332.4	0.01653	0.01097	0.02461	0.04002	0.00867								332.4	0.0176174	0.0106858	0.0241766	0.0393178	0.00923895								332.4	0.630808	0.396472	0.703156	0.841799	0.369126		332.4	0.588272	0.202543	0.0905802
334.5	0.068	0.0007	0.0617	0.0235	0.053		334.5	0.01318	0.01089	0.02664	0.04348	0.01176								334.5	0.0142674	0.0106058	0.0262066	0.0427778	0.0123289								334.5	0.510858	0.393504	0.762197	0.915878	0.492582		334.5	0.615004	0.216268	0.0967178
336.6	0.0674	-0.0012	0.0637	0.0236	0.0523		336.6	0.01262	0.00901	0.02867	0.04365	0.01095								336.6	0.0137074	0.00872579	0.0282366	0.0429478	0.0115189								336.6	0.490807	0.323751	0.821238	0.919517	0.460219		336.6	0.603107	0.254345	0.113746
338.7	0.068	0.0048	0.0609	0.0216	0.0522		338.7	0.01326	0.01503	0.02589	0.04171	0.01074								338.7	0.0143474	0.0147458	0.0254566	0.0410078	0.0113089								338.7	0.513723	0.54711	0.740384	0.877982	0.451829		338.7	0.626205	0.177302	0.0792917
340.8	0.0664	0.0058	0.058	0.0185	0.0505		340.8	0.0117	0.01605	0.02302	0.03867	0.00894								340.8	0.0127874	0.0157658	0.0225866	0.0379678	0.00950895								340.8	0.457865	0.584955	0.656912	0.812895	0.379913		340.8	0.578508	0.169647	0.0758685
342.9	0.0702	0.0047	0.0597	0.0212	0.0431		342.9	0.01554	0.01496	0.02475	0.04143	0.00143								342.9	0.0166274	0.0146758	0.0243166	0.0407278	0.00199895								342.9	0.59536	0.544513	0.707228	0.871987	0.0798644		342.9	0.55979	0.29624	0.132482
345	0.0697	0.0055	0.0583	0.0245	0.045		345	0.01508	0.01578	0.02337	0.0448	0.00322								345	0.0161674	0.0154958	0.0229366	0.0440978	0.00378895								345	0.578889	0.574937	0.667092	0.944139	0.151381		345	0.583288	0.284548	0.127254
347.1	0.0702	0.006	0.0544	0.0255	0.0515		347.1	0.01562	0.0163	0.0195	0.04586	0.00962								347.1	0.0167074	0.0160158	0.0190666	0.0451578	0.0101889								347.1	0.598225	0.59423	0.554536	0.966834	0.407082		347.1	0.624181	0.206739	0.0924566
349.2	0.0717	0.0056	0.0535	0.0216	0.0544		349.2	0.01716	0.01592	0.01863	0.04202	0.01241								349.2	0.0182474	0.0156358	0.0181966	0.0413178	0.0129789								349.2	0.653366	0.580131	0.529233	0.884619	0.518551		349.2	0.63318	0.150323	0.0672265
351.3	0.0693	0.0051	0.0545	0.0213	0.0536		351.3	0.0148	0.01544	0.01965	0.04178	0.0115								351.3	0.0158874	0.0151558	0.0192166	0.0410778	0.0120689								351.3	0.568864	0.562322	0.558899	0.87948	0.482194		351.3	0.610352	0.15454	0.0691123
353.4	0.0708	0.0027	0.0585	0.0252	0.05		353.4	0.01635	0.01306	0.02368	0.04574	0.00779								353.4	0.0174374	0.0127758	0.0232466	0.0450378	0.00835895								353.4	0.624363	0.474017	0.676108	0.964265	0.333967		353.4	0.614544	0.236993	0.105986
355.5	0.0702	0.0007	0.0549	0.0237	0.0498		355.5	0.01579	0.01108	0.02011	0.04431	0.00749								355.5	0.0168774	0.0107958	0.0196766	0.0436078	0.00805895								355.5	0.604312	0.400554	0.572277	0.933648	0.321981		355.5	0.566554	0.236426	0.105733
357.6	0.0695	0.0033	0.0565	0.0184	0.0494		357.6	0.01513	0.0137	0.02173	0.03907	0.00698								357.6	0.0162174	0.0134158	0.0212966	0.0383678	0.00754895								357.6	0.58068	0.497763	0.619394	0.821459	0.301605		357.6	0.56418	0.188991	0.0845193
359.7	0.0713	0.0055	0.0576	0.0169	0.0502		359.7	0.01697	0.01592	0.02286	0.03763	0.00767								359.7	0.0180574	0.0156358	0.0224266	0.0369278	0.00823895								359.7	0.646563	0.580131	0.652259	0.790628	0.329173		359.7	0.599751	0.169544	0.0758222
361.8	0.0684	0.0063	0.0557	0.0117	0.0474		361.8	0.01411	0.01674	0.02099	0.03249	0.00477								361.8	0.0151974	0.0164558	0.0205566	0.0317878	0.00533895								361.8	0.544158	0.610556	0.597871	0.68058	0.213308		361.8	0.529295	0.183209	0.0819334
363.9	0.0686	0.008	0.0581	0.0159	0.0436		363.9	0.01435	0.01846	0.02341	0.03675	0.000859809								363.9	0.0154374	0.0181758	0.0229766	0.0360478	0.00142876								363.9	0.552751	0.674372	0.668255	0.771787	0.0570834		363.9	0.54485	0.283498	0.126784
366	0.0681	0.0064	0.0591	0.0178	0.0501		366	0.01389	0.01688	0.02444	0.03872	0.00725								366	0.0149774	0.0165958	0.0240066	0.0380178	0.00781895								366	0.53628	0.61575	0.698212	0.813965	0.312392		366	0.59532	0.188642	0.0843634
368.1	0.0727	0.0103	0.0611	0.0188	0.0512		368.1	0.01853	0.0208	0.02647	0.03978	0.00825								368.1	0.0196174	0.0205158	0.0260366	0.0390778	0.00881895								368.1	0.70242	0.761193	0.757253	0.83666	0.352346		368.1	0.681974	0.190357	0.0851303
370.2	0.0723	0.0084	0.0559	0.0183	0.0513		370.2	0.01817	0.01892	0.02129	0.03934	0.00824								370.2	0.0192574	0.0186358	0.0208566	0.0386378	0.00880895								370.2	0.68953	0.69144	0.606597	0.82724	0.351946		370.2	0.63335	0.176088	0.0787489
372.3	0.0698	0.0079	0.0592	0.0224	0.0536		372.3	0.01572	0.01844	0.02462	0.0435	0.01043								372.3	0.0168074	0.0181558	0.0241866	0.0427978	0.0109989								372.3	0.601805	0.67363	0.703447	0.916306	0.439444		372.3	0.666926	0.172886	0.0773169
374.4	0.0704	0.0069	0.065	0.0205	0.0484		374.4	0.01636	0.01746	0.03044	0.04166	0.00512								374.4	0.0174474	0.0171758	0.0300066	0.0409578	0.00568895								374.4	0.624721	0.63727	0.872717	0.876911	0.227292		374.4	0.647782	0.264835	0.118438
376.5	0.0676	0.0031	0.063	0.0201	0.0501		376.5	0.0136	0.01367	0.02847	0.04133	0.00672								376.5	0.0146874	0.0133858	0.0280366	0.0406278	0.00728895								376.5	0.525897	0.49665	0.815421	0.869846	0.291217		376.5	0.599806	0.240178	0.107411
378.6	0.0694	0.0057	0.0574	0.0217	0.05		378.6	0.01544	0.01629	0.0229	0.04299	0.00651								378.6	0.0165274	0.0160058	0.0224666	0.0422878	0.00707895								378.6	0.59178	0.593859	0.653422	0.905387	0.282827		378.6	0.605455	0.221738	0.0991641
380.7	0.0704	0.0028	0.0583	0.0174	0.0484		380.7	0.01648	0.01341	0.02382	0.03875	0.0048								380.7	0.0175674	0.0131258	0.0233866	0.0380478	0.00536895								380.7	0.629018	0.487003	0.68018	0.814608	0.214507		380.7	0.565063	0.228362	0.102127
382.8	0.0683	0.002	0.0577	0.019	0.0463		382.8	0.01442	0.01263	0.02325	0.04041	0.0026								382.8	0.0155074	0.0123458	0.0228166	0.0397078	0.00316895								382.8	0.555257	0.458063	0.663602	0.850149	0.12661		382.8	0.530736	0.268737	0.120183
384.9	0.0662	0.0031	0.0622	0.0217	0.0458		384.9	0.01236	0.01375	0.02778	0.04317	0.00199								384.9	0.0134474	0.0134658	0.0273466	0.0424678	0.00255895								384.9	0.481497	0.499618	0.795353	0.909241	0.102238		384.9	0.557589	0.314915	0.140834
387	0.068	0.0019	0.0574	0.0278	0.0479		387	0.0142	0.01257	0.023	0.04934	0.00398								387	0.0152874	0.0122858	0.0225666	0.0486378	0.00454895								387	0.54738	0.455837	0.656331	1.04134	0.181745		387	0.576527	0.313723	0.140301
389.1	0.0685	0.0057	0.056	0.0243	0.057		389.1	0.01475	0.01639	0.02163	0.0459	0.01298								389.1	0.0158374	0.0161058	0.0211966	0.0451978	0.0135489								389.1	0.567073	0.59757	0.616485	0.96769	0.541325		389.1	0.658029	0.175474	0.0784742
391.2	0.0691	0.0064	0.0571	0.0277	0.0544		391.2	0.01539	0.01711	0.02276	0.04936	0.01027								391.2	0.0164774	0.0168258	0.0223266	0.0486578	0.0108389								391.2	0.589989	0.624284	0.64935	1.04177	0.433051		391.2	0.667689	0.225415	0.100809
393.3	0.0663	0.003	0.0587	0.0265	0.0498		393.3	0.01263	0.01373	0.02438	0.04822	0.00556								393.3	0.0137174	0.0134458	0.0239466	0.0475178	0.00612895								393.3	0.491165	0.498876	0.696467	1.01736	0.244871		393.3	0.589748	0.287732	0.128678
395.4	0.0663	0.0028	0.058	0.0245	0.0501		395.4	0.01267	0.01355	0.02371	0.04629	0.00575								395.4	0.0137574	0.0132658	0.0232766	0.0455878	0.00631895								395.4	0.492597	0.492198	0.67698	0.97604	0.252462		395.4	0.578056	0.26873	0.12018
397.5	0.0702	-0.0013	0.0547	0.0234	0.0488		397.5	0.01661	0.00947	0.02044	0.04525	0.00435								397.5	0.0176974	0.00918579	0.0200066	0.0445478	0.00491895								397.5	0.633672	0.340818	0.581875	0.953774	0.196528		397.5	0.541333	0.291279	0.130264
399.6	0.0716	0.0037	0.0569	0.0208	0.0516		399.6	0.01805	0.01449	0.02266	0.04271	0.00704								399.6	0.0191374	0.0142058	0.0222266	0.0420078	0.00760895								399.6	0.685233	0.527074	0.646442	0.899392	0.304002		399.6	0.612429	0.218642	0.0977797
401.7	0.0721	0.0036	0.0584	0.0206	0.0497		401.7	0.01859	0.01441	0.02419	0.04257	0.00503								401.7	0.0196774	0.0141258	0.0237566	0.0418678	0.00559895								401.7	0.704568	0.524106	0.690941	0.896394	0.223696		401.7	0.607941	0.252043	0.112717
403.8	0.0698	0.0019	0.0593	0.0198	0.0485		403.8	0.01633	0.01273	0.02512	0.04183	0.00373								403.8	0.0174174	0.0124458	0.0246866	0.0411278	0.00429895								403.8	0.623647	0.461773	0.717989	0.880551	0.171757		403.8	0.571143	0.269965	0.120732
405.9	0.0688	0.0064	0.059	0.023	0.0477		405.9	0.01537	0.01725	0.02484	0.0451	0.00282								405.9	0.0164574	0.0169658	0.0244066	0.0443978	0.00338895								405.9	0.589273	0.629478	0.709846	0.950562	0.135399		405.9	0.602912	0.296545	0.132619
408	0.0698	0.0071	0.0567	0.0254	0.0538		408	0.01642	0.01797	0.02257	0.04756	0.00881								408	0.0175074	0.0176858	0.0221366	0.0468578	0.00937895								408	0.626869	0.656192	0.643824	1.00323	0.374719		408	0.660967	0.223921	0.10014
410.1	0.0676	0.0052	0.0559	0.0227	0.051		410.1	0.01426	0.01608	0.0218	0.04492	0.00591								410.1	0.0153474	0.0157958	0.0213666	0.0442178	0.00647895								410.1	0.549528	0.586068	0.62143	0.946708	0.258855		410.1	0.592518	0.244697	0.109432
412.2	0.0676	0.0058	0.0571	0.0192	0.0477		412.2	0.0143	0.0167	0.02302	0.04148	0.0025								412.2	0.0153874	0.0164158	0.0225866	0.0407778	0.00306895								412.2	0.550961	0.609071	0.656912	0.873057	0.122614		412.2	0.562523	0.274391	0.122711
414.3	0.0678	0.0016	0.0601	0.0179	0.0478		414.3	0.01454	0.01252	0.02605	0.04024	0.00249								414.3	0.0156274	0.0122358	0.0256166	0.0395378	0.00305895								414.3	0.559554	0.453982	0.745037	0.846509	0.122215		414.3	0.545459	0.282031	0.126128
416.4	0.0721	-0.0037	0.0615	0.023	0.047		416.4	0.01888	0.00724	0.02748	0.04541	0.00158								416.4	0.0199674	0.00695579	0.0270466	0.0447078	0.00214895								416.4	0.714952	0.258079	0.786628	0.957199	0.0858574		416.4	0.560543	0.370508	0.165696
418.5	0.0708	-0.0006	0.0569	0.0219	0.0486		418.5	0.01762	0.01036	0.0229	0.04437	0.00308								418.5	0.0187074	0.0100758	0.0224666	0.0436678	0.00364895								418.5	0.669837	0.37384	0.653422	0.934933	0.145787		418.5	0.555564	0.303107	0.135554
420.6	0.0756	-0.0002	0.059	0.0187	0.0548		420.6	0.02246	0.01078	0.02503	0.04123	0.00917								420.6	0.0235474	0.0104958	0.0245966	0.0405278	0.00973895								420.6	0.843137	0.389423	0.715372	0.867705	0.389103		420.6	0.640948	0.236922	0.105955
422.7	0.0692	-0.003	0.0593	0.0205	0.0499		422.7	0.0161	0.008	0.02536	0.04309	0.00416								422.7	0.0171874	0.00771579	0.0249266	0.0423878	0.00472895								422.7	0.615411	0.286277	0.724969	0.907528	0.188937		422.7	0.544625	0.301036	0.134627
424.8	0.0673	0.004	0.0581	0.0236	0.0512		424.8	0.01424	0.01502	0.02418	0.04625	0.00536								424.8	0.0153274	0.0147358	0.0237466	0.0455478	0.00592895								424.8	0.548812	0.546739	0.69065	0.975184	0.236881		424.8	0.599653	0.267531	0.119644
426.9	0.0678	0.005	0.058	0.026	0.051		426.9	0.01479	0.01604	0.02411	0.04872	0.00505								426.9	0.0158774	0.0157558	0.0236766	0.0480178	0.00561895								426.9	0.568506	0.584584	0.688614	1.02807	0.224495		426.9	0.618853	0.287902	0.128754
429	0.0715	0.007	0.0565	0.0254	0.0533		429	0.01853	0.01806	0.02264	0.04818	0.00724								429	0.0196174	0.0177758	0.0222066	0.0474778	0.00780895								429	0.70242	0.659531	0.64586	1.01651	0.311993		429	0.667262	0.24997	0.11179
431.1	0.0713	0.0031	0.0583	0.0237	0.0527		431.1	0.01837	0.01418	0.02446	0.04654	0.00653								431.1	0.0194574	0.0138958	0.0240266	0.0458378	0.00709895								431.1	0.696691	0.515572	0.698794	0.981393	0.283626		431.1	0.635215	0.257677	0.115237
433.2	0.0711	0	0.0586	0.0236	0.0498		433.2	0.01821	0.0111	0.02479	0.0465	0.00353								433.2	0.0192974	0.0108158	0.0243566	0.0457978	0.00409895								433.2	0.690962	0.401296	0.708391	0.980536	0.163766		433.2	0.58899	0.31385	0.140358
435.3	0.0717	-0.0013	0.0558	0.0242	0.0481		435.3	0.01885	0.00982	0.02201	0.04716	0.00172								435.3	0.0199374	0.00953579	0.0215766	0.0464578	0.00228895								435.3	0.713878	0.353804	0.627537	0.994667	0.0914509		435.3	0.556267	0.346107	0.154784
437.4	0.0736	-0.0026	0.0567	0.0205	0.0487		437.4	0.02079	0.00854	0.02294	0.04353	0.00221								437.4	0.0218774	0.00825579	0.0225066	0.0428278	0.00277895								437.4	0.783341	0.306313	0.654586	0.916948	0.111028		437.4	0.554443	0.336162	0.150336
439.5	0.0706	0.0009	0.0552	0.018	0.0534		439.5	0.01783	0.01206	0.02147	0.04109	0.00681								439.5	0.0189174	0.0117758	0.0210366	0.0403878	0.00737895								439.5	0.677356	0.436915	0.611832	0.864707	0.294813		439.5	0.577125	0.219837	0.0983142
441.6	0.0733	-0.001	0.0562	0.018	0.0548		441.6	0.02057	0.01018	0.02249	0.04115	0.0081								441.6	0.0216574	0.00989579	0.0220566	0.0404478	0.00866895								441.6	0.775464	0.367161	0.641498	0.865992	0.346353		441.6	0.599294	0.235483	0.105311
443.7	0.0704	0.0062	0.0602	0.0188	0.0555		443.7	0.01772	0.01739	0.02652	0.04201	0.00869								443.7	0.0188074	0.0171058	0.0260866	0.0413078	0.00925895								443.7	0.673417	0.634672	0.758707	0.884405	0.369925		443.7	0.664225	0.190379	0.08514
445.8	0.0702	0.0069	0.0621	0.0194	0.0499		445.8	0.01756	0.01811	0.02845	0.04268	0.00299								445.8	0.0186474	0.0178258	0.0280166	0.0419778	0.00355895								445.8	0.667688	0.661386	0.814839	0.89875	0.142192		445.8	0.636971	0.294326	0.131627
447.9	0.0717	0.01	0.06	0.0191	0.0529		447.9	0.0191	0.02123	0.02637	0.04244	0.00588								447.9	0.0201874	0.0209458	0.0259366	0.0417378	0.00644895								447.9	0.722829	0.777147	0.754344	0.893611	0.257656		447.9	0.681118	0.245355	0.109726
450	0.0715	0.0084	0.0557	0.0172	0.0522		450	0.01894	0.01965	0.0221	0.0406	0.00507								450	0.0200274	0.0193658	0.0216666	0.0398978	0.00563895								450	0.7171	0.718525	0.630155	0.854216	0.225294		450	0.629058	0.23952	0.107116
452.1	0.0719	0.0071	0.0598	0.019	0.0483		452.1	0.01938	0.01837	0.02623	0.04246	0.00106								452.1	0.0204674	0.0180858	0.0257966	0.0417578	0.00162895								452.1	0.732855	0.671033	0.750273	0.894039	0.0650817		452.1	0.622656	0.322222	0.144102
454.2	0.0686	-0.0003	0.0622	0.0222	0.0458		454.2	0.01612	0.01099	0.02865	0.04572	-0.00154								454.2	0.0172074	0.0107058	0.0282166	0.0450178	-0.000971053								454.2	0.616128	0.397215	0.820656	0.963836	-0.0387967		454.2	0.551808	0.39335	0.175911
456.3	0.0698	0	0.0619	0.0244	0.0487		456.3	0.01736	0.01131	0.02838	0.04799	0.00125								456.3	0.0184474	0.0110258	0.0279466	0.0472878	0.00181895								456.3	0.660527	0.409087	0.812804	1.01244	0.0726728		456.3	0.593506	0.365159	0.163304
458.4	0.0683	-0.0007	0.0628	0.022	0.05		458.4	0.0159	0.01063	0.02931	0.04565	0.00244								458.4	0.0169874	0.0103458	0.0288766	0.0449478	0.00300895								458.4	0.60825	0.383858	0.839852	0.962338	0.120217		458.4	0.582903	0.34071	0.15237
460.5	0.0695	-0.0021	0.0651	0.023	0.0524		460.5	0.01714	0.00925	0.03163	0.04671	0.00474								460.5	0.0182274	0.00896579	0.0311966	0.0460078	0.00530895								460.5	0.65265	0.332656	0.907327	0.985032	0.21211		460.5	0.617955	0.341245	0.152609
462.6	0.0678	-0.0017	0.0649	0.0212	0.0484		462.6	0.01549	0.00967	0.03146	0.04497	0.000629298								462.6	0.0165774	0.00938579	0.0310266	0.0442678	0.00119824								462.6	0.59357	0.348239	0.902383	0.947779	0.0478738		462.6	0.567969	0.379316	0.169635
464.7	0.0677	-0.0016	0.0638	0.022	0.0459		464.7	0.01543	0.00979	0.03039	0.04583	-0.00198								464.7	0.0165174	0.00950579	0.0299566	0.0451278	-0.00141105								464.7	0.591421	0.352691	0.871263	0.966191	-0.0563762		464.7	0.545038	0.413715	0.185019
466.8	0.0676	0.0012	0.0642	0.0236	0.0502		466.8	0.01537	0.01261	0.03081	0.0475	0.00222								466.8	0.0164574	0.0123258	0.0303766	0.0467978	0.00278895								466.8	0.589273	0.457321	0.883478	1.00195	0.111427		466.8	0.608689	0.353807	0.158227
468.9	0.0683	0.0038	0.0635	0.0258	0.0519		468.9	0.01611	0.01523	0.03014	0.04976	0.00381								468.9	0.0171974	0.0149458	0.0297066	0.0490578	0.00437895								468.9	0.61577	0.55453	0.863992	1.05033	0.174953		468.9	0.651916	0.332414	0.14866
471	0.068	0.005	0.0599	0.0259	0.055		471	0.01585	0.01645	0.02657	0.04992	0.0068								471	0.0169374	0.0161658	0.0261366	0.0492178	0.00736895								471	0.60646	0.599796	0.760161	1.05376	0.294413		471	0.662918	0.276216	0.123527
473.1	0.0666	0.0013	0.0609	0.0274	0.0528		473.1	0.01449	0.01277	0.02759	0.05148	0.00449								473.1	0.0155774	0.0124858	0.0271566	0.0507778	0.00505895								473.1	0.557764	0.463258	0.789827	1.08716	0.202121		473.1	0.620026	0.335463	0.150024
475.2	0.0667	-0.0016	0.0583	0.0279	0.0498		475.2	0.01463	0.00989	0.02502	0.05204	0.00139								475.2	0.0157174	0.00960579	0.0245866	0.0513378	0.00195895								475.2	0.562777	0.356401	0.715081	1.09915	0.0782663		475.2	0.562335	0.383481	0.171498
477.3	0.0676	0.0006	0.0583	0.0236	0.0524		477.3	0.01557	0.0121	0.02505	0.04781	0.00388								477.3	0.0166574	0.0118158	0.0246166	0.0471078	0.00444895								477.3	0.596434	0.438399	0.715953	1.00858	0.17775		477.3	0.587424	0.309846	0.138567
479.4	0.0694	-0.0022	0.0541	0.0185	0.0554		479.4	0.01742	0.00932	0.02087	0.04277	0.00677								479.4	0.0185074	0.00903579	0.0204366	0.0420678	0.00733895								479.4	0.662675	0.335253	0.594381	0.900676	0.293215		479.4	0.55724	0.249716	0.111676
481.5	0.0674	-0.0021	0.0574	0.0144	0.0499		481.5	0.01546	0.00944	0.0242	0.03873	0.00117								481.5	0.0165474	0.00915579	0.0237666	0.0380278	0.00173895								481.5	0.592496	0.339705	0.691232	0.81418	0.0694766		481.5	0.501418	0.297854	0.133204
483.6	0.0713	0.0015	0.0578	0.0183	0.0504		483.6	0.0194	0.01306	0.02463	0.04269	0.00156								483.6	0.0204874	0.0127758	0.0241966	0.0419878	0.00212895								483.6	0.733571	0.474017	0.703738	0.898964	0.0850583		483.6	0.57907	0.314972	0.14086
485.7	0.0708	0.0071	0.0567	0.0217	0.049		485.7	0.01894	0.01868	0.02355	0.04615	5.1945e-05								485.7	0.0200274	0.0183958	0.0231166	0.0454478	0.000620892								485.7	0.7171	0.682535	0.672327	0.973043	0.0248066		485.7	0.613962	0.351706	0.157288
487.8	0.0692	0.012	0.058	0.0229	0.0513		487.8	0.01738	0.0236	0.02488	0.04742	0.00224								487.8	0.0184674	0.0233158	0.0244466	0.0467178	0.00280895								487.8	0.661243	0.865081	0.711009	1.00023	0.112227		487.8	0.669959	0.339109	0.151654
489.9	0.0706	0.0065	0.0597	0.0242	0.0548		489.9	0.01882	0.01812	0.02661	0.04878	0.00564								489.9	0.0199074	0.0178358	0.0261766	0.0480778	0.00620895								489.9	0.712804	0.661757	0.761325	1.02935	0.248068		489.9	0.682661	0.281336	0.125817
492	0.0681	0.0023	0.0586	0.0234	0.0507		492	0.01636	0.01394	0.02553	0.04804	0.00143								492	0.0174474	0.0136558	0.0250966	0.0473378	0.00199895								492	0.624721	0.506668	0.729914	1.01351	0.0798644		492	0.590935	0.341803	0.152859
494.1	0.0665	-0.0006	0.0612	0.022	0.0466		494.1	0.0148	0.01106	0.02816	0.0467	-0.00278								494.1	0.0158874	0.0107758	0.0277266	0.0459978	-0.00221105								494.1	0.568864	0.399812	0.806405	0.984818	-0.0883388		494.1	0.534312	0.413512	0.184928
496.2	0.0686	-0.0022	0.0638	0.0206	0.0521		496.2	0.01694	0.00948	0.03079	0.04537	0.00262								496.2	0.0180274	0.00919579	0.0303566	0.0446678	0.00318895								496.2	0.645488	0.341189	0.882896	0.956343	0.127409		496.2	0.590665	0.353189	0.157951
498.3	0.068	-0.0027	0.0634	0.0207	0.0538		498.3	0.01639	0.009	0.03041	0.04553	0.00421								498.3	0.0174774	0.00871579	0.0299766	0.0448278	0.00477895								498.3	0.625795	0.32338	0.871844	0.959768	0.190934		498.3	0.594345	0.334549	0.149615
500.4	0.0663	-0.0007	0.0624	0.0177	0.0551		500.4	0.01473	0.01102	0.02944	0.04259	0.0054								500.4	0.0158174	0.0107358	0.0290066	0.0418878	0.00596895								500.4	0.566357	0.398328	0.843633	0.896823	0.238479		500.4	0.588724	0.282545	0.126358
502.5	0.0674	-0.0016	0.0614	0.0137	0.0521		502.5	0.01587	0.01014	0.02846	0.03865	0.0023								502.5	0.0169574	0.00985579	0.0280266	0.0379478	0.00286895								502.5	0.607176	0.365677	0.81513	0.812467	0.114624		502.5	0.543015	0.30238	0.135229
504.6	0.0663	-0.0006	0.0624	0.0184	0.0512		504.6	0.01481	0.01116	0.02949	0.04341	0.00129								504.6	0.0158974	0.0108758	0.0290566	0.0427078	0.00185895								504.6	0.569222	0.403522	0.845087	0.914379	0.074271		504.6	0.561296	0.341816	0.152865
506.7	0.0688	0.0031	0.0615	0.0226	0.056		506.7	0.01735	0.01488	0.02862	0.04768	0.00598								506.7	0.0184374	0.0145958	0.0281866	0.0469778	0.00654895								506.7	0.660169	0.541544	0.819784	1.0058	0.261652		506.7	0.65779	0.281868	0.126055
508.8	0.0674	0.0076	0.062	0.0243	0.0551		508.8	0.01599	0.0194	0.02914	0.04944	0.00497								508.8	0.0170774	0.0191158	0.0287066	0.0487378	0.00553895								508.8	0.611473	0.709249	0.834908	1.04348	0.221299		508.8	0.684082	0.304955	0.13638
510.9	0.0687	0.0063	0.0615	0.0233	0.0565		510.9	0.01733	0.01811	0.02867	0.0485	0.00627								510.9	0.0184174	0.0178258	0.0282366	0.0477978	0.00683895								510.9	0.659453	0.661386	0.821238	1.02336	0.273238		510.9	0.687734	0.275575	0.123241
513	0.0669	0.0042	0.0645	0.0259	0.0554		513	0.01557	0.01603	0.0317	0.05116	0.00506								513	0.0166574	0.0157458	0.0312666	0.0504578	0.00562895								513	0.596434	0.584213	0.909363	1.08031	0.224895		513	0.679042	0.3302	0.14767
515.1	0.068	-0.0001	0.0638	0.0235	0.0552		515.1	0.01671	0.01175	0.03102	0.04882	0.00475								515.1	0.0177974	0.0114658	0.0305866	0.0481178	0.00531895								515.1	0.637253	0.425413	0.889586	1.03021	0.212509		515.1	0.638994	0.332924	0.148888
517.2	0.0683	0.0014	0.0627	0.0241	0.0529		517.2	0.01706	0.01327	0.02995	0.04949	0.00235								517.2	0.0181474	0.0129858	0.0295166	0.0487878	0.00291895								517.2	0.649785	0.481809	0.858466	1.04455	0.116621		517.2	0.630247	0.357057	0.159681
519.3	0.0694	0.003	0.0608	0.0216	0.0549		519.3	0.0182	0.01489	0.02808	0.04705	0.00424								519.3	0.0192874	0.0146058	0.0276466	0.0463478	0.00480895								519.3	0.690604	0.541915	0.804078	0.992312	0.192133		519.3	0.644209	0.301547	0.134856
521.4	0.0707	0.002	0.0604	0.0171	0.0567		521.4	0.01954	0.01391	0.0277	0.04261	0.00593								521.4	0.0206274	0.0136258	0.0272666	0.0419078	0.00649895								521.4	0.738584	0.505555	0.793026	0.897251	0.259654		521.4	0.638814	0.255952	0.114465
523.5	0.0701	0.0067	0.0613	0.0165	0.057		523.5	0.01898	0.01863	0.02863	0.04207	0.00613								523.5	0.0200674	0.0183458	0.0281966	0.0413678	0.00669895								523.5	0.718533	0.68068	0.820075	0.885689	0.267645		523.5	0.674524	0.241506	0.108005
525.6	0.0715	0.0047	0.0609	0.0204	0.0585		525.6	0.02042	0.01665	0.02826	0.04603	0.00752								525.6	0.0215074	0.0163658	0.0278266	0.0453278	0.00808895								525.6	0.770093	0.607216	0.809313	0.970473	0.32318		525.6	0.696055	0.245226	0.109668
527.7	0.0692	0.0079	0.0612	0.019	0.0598		527.7	0.01816	0.01987	0.02858	0.0447	0.00871								527.7	0.0192474	0.0195858	0.0281466	0.0439978	0.00927895								527.7	0.689172	0.726687	0.81862	0.941998	0.370724		527.7	0.70944	0.212979	0.0952471
529.8	0.0704	0.0079	0.0637	0.0165	0.0628		529.8	0.0194	0.01989	0.03111	0.04226	0.0116								529.8	0.0204874	0.0196058	0.0306766	0.0415578	0.0121689								529.8	0.733571	0.727429	0.892203	0.889757	0.486189		529.8	0.74583	0.165863	0.0741763
531.9	0.0726	0.0053	0.063	0.0213	0.0608		531.9	0.02164	0.01731	0.03044	0.04712	0.0095								531.9	0.0227274	0.0170258	0.0300066	0.0464178	0.0100689								531.9	0.813776	0.631704	0.872717	0.993811	0.402287		531.9	0.742859	0.230875	0.103251
534	0.0737	0.0021	0.0631	0.022	0.0505		534	0.02279	0.01413	0.03056	0.04788	-0.000909794								534	0.0238774	0.0138458	0.0301266	0.0471778	-0.000340847								534	0.854953	0.513717	0.876207	1.01008	-0.013618		534	0.648268	0.41285	0.184632
536.1	0.0735	-0.0002	0.0657	0.0244	0.0499		536.1	0.02263	0.01185	0.03319	0.05034	-0.00162								536.1	0.0237174	0.0115658	0.0327566	0.0496378	-0.00105105								536.1	0.849224	0.429123	0.952699	1.06275	-0.041993		536.1	0.650361	0.455335	0.203632
538.2	0.074	0.0051	0.0626	0.0224	0.0477		538.2	0.02317	0.01717	0.03012	0.04841	-0.00392								538.2	0.0242574	0.0168858	0.0296866	0.0477078	-0.00335105								538.2	0.86856	0.62651	0.86341	1.02143	-0.133885		538.2	0.649205	0.459972	0.205706
540.3	0.0728	0.0016	0.0654	0.0216	0.0521		540.3	0.02201	0.01369	0.03294	0.04767	0.00036911								540.3	0.0230974	0.0134058	0.0325066	0.0469678	0.000938057								540.3	0.827025	0.497392	0.945427	1.00559	0.0374784		540.3	0.662582	0.400854	0.179268
542.4	0.0706	0.0026	0.0654	0.0207	0.0531		542.4	0.01985	0.01471	0.03297	0.04683	0.00126								542.4	0.0209374	0.0144258	0.0325366	0.0461278	0.00182895								542.4	0.749684	0.535237	0.9463	0.987602	0.0730724		542.4	0.658379	0.373286	0.166939
544.5	0.0692	0.0057	0.0648	0.0256	0.0555		544.5	0.01849	0.01782	0.0324	0.05179	0.00356								544.5	0.0195774	0.0175358	0.0319666	0.0510878	0.00412895								544.5	0.700988	0.650627	0.929722	1.0938	0.164965		544.5	0.708019	0.352217	0.157516
546.6	0.0697	0.0074	0.0659	0.0274	0.0565		546.6	0.01903	0.01954	0.03352	0.05366	0.00445								546.6	0.0201174	0.0192558	0.0330866	0.0529578	0.00501895								546.6	0.720323	0.714443	0.962296	1.13383	0.200523		546.6	0.746284	0.352278	0.157543
548.7	0.0665	0.0076	0.0617	0.0238	0.0592		548.7	0.01587	0.01976	0.02935	0.05012	0.00704								548.7	0.0169574	0.0194758	0.0289166	0.0494178	0.00760895								548.7	0.607176	0.722606	0.841015	1.05804	0.304002		548.7	0.706568	0.280091	0.125261
550.8	0.0695	0.0047	0.065	0.0236	0.0613		550.8	0.01891	0.01688	0.03268	0.04998	0.00903								550.8	0.0199974	0.0165958	0.0322466	0.0492778	0.00959895								550.8	0.716026	0.61575	0.937866	1.05504	0.383509		550.8	0.741639	0.265277	0.118636
552.9	0.0684	0.0016	0.0634	0.0254	0.0542		552.9	0.01786	0.0138	0.0311	0.05184	0.00183								552.9	0.0189474	0.0135158	0.0306666	0.0511378	0.00239895								552.9	0.67843	0.501473	0.891913	1.09487	0.0958457		552.9	0.652506	0.382868	0.171224
555	0.0672	-0.002	0.0616	0.032	0.0541		555	0.0167	0.01022	0.02933	0.0585	0.00162								555	0.0177874	0.00993579	0.0288966	0.0577978	0.00218895								555	0.636895	0.368645	0.840434	1.23746	0.0874555		555	0.634177	0.440428	0.196966
557.1	0.0701	-0.0007	0.0623	0.0316	0.0572		557.1	0.01964	0.01154	0.03006	0.05817	0.00461								557.1	0.0207274	0.0112558	0.0296266	0.0574678	0.00517895								557.1	0.742165	0.417621	0.861665	1.23039	0.206916		557.1	0.691752	0.397416	0.17773
559.2	0.0691	0.0016	0.0622	0.0236	0.0619		559.2	0.01868	0.01386	0.02998	0.05023	0.00921								559.2	0.0197674	0.0135758	0.0295466	0.0495278	0.00977895								559.2	0.707791	0.5037	0.859338	1.0604	0.390701		559.2	0.704385	0.268997	0.120299
561.3	0.0707	0.0027	0.0621	0.0221	0.0598		561.3	0.02032	0.01498	0.02991	0.04879	0.007								561.3	0.0214074	0.0146958	0.0294766	0.0480878	0.00756895								561.3	0.766513	0.545255	0.857302	1.02957	0.302404		561.3	0.700208	0.282759	0.126454
563.4	0.0708	0.0047	0.0615	0.0205	0.0574		563.4	0.02046	0.017	0.02934	0.04725	0.00449								563.4	0.0215474	0.0167158	0.0289066	0.0465478	0.00505895								563.4	0.771525	0.620202	0.840724	0.996594	0.202121		563.4	0.686233	0.302568	0.135313
565.5	0.0674	0.0059	0.064	0.0192	0.0583		565.5	0.0171	0.01822	0.03186	0.04601	0.00528								565.5	0.0181874	0.0179358	0.0314266	0.0453078	0.00584895								565.5	0.651217	0.665468	0.914017	0.970045	0.233684		565.5	0.686886	0.291071	0.130171
567.6	0.0729	0.0072	0.0636	0.0197	0.0581		567.6	0.02264	0.01954	0.03149	0.04658	0.00498								567.6	0.0237274	0.0192558	0.0310566	0.0458778	0.00554895								567.6	0.849582	0.714443	0.903255	0.982249	0.221698		567.6	0.734246	0.302684	0.135364
569.7	0.0742	0.0073	0.062	0.017	0.0604		569.7	0.02398	0.01966	0.02991	0.04394	0.00717								569.7	0.0250674	0.0193758	0.0294766	0.0432378	0.00773895								569.7	0.897562	0.718896	0.857302	0.925726	0.309196		569.7	0.741737	0.25451	0.113821
571.8	0.0709	0.0022	0.0608	0.0199	0.0558		571.8	0.02073	0.01458	0.02874	0.0469	0.00246								571.8	0.0218174	0.0142958	0.0283066	0.0461978	0.00302895								571.8	0.781193	0.530414	0.823274	0.9891	0.121016		571.8	0.648999	0.337766	0.151054
573.9	0.0719	-0.0029	0.0657	0.0205	0.0537		573.9	0.02177	0.0095	0.03367	0.04756	0.000256596								573.9	0.0228574	0.00921579	0.0332366	0.0468578	0.000825543								573.9	0.818431	0.341931	0.966659	1.00323	0.0329831		573.9	0.632647	0.426475	0.190726
576	0.0692	-0.0048	0.0622	0.0255	0.0538		576	0.01911	0.00762	0.03019	0.05262	0.000249563								576	0.0201974	0.00733579	0.0297566	0.0519178	0.00081851								576	0.723187	0.272178	0.865446	1.11157	0.0327021		576	0.601016	0.440632	0.197057
578.1	0.0694	-0.0026	0.063	0.0235	0.0556		578.1	0.01935	0.00984	0.03102	0.05069	0.00194								578.1	0.0204374	0.00955579	0.0305866	0.0499878	0.00250895								578.1	0.731781	0.354546	0.889586	1.07024	0.100241		578.1	0.62928	0.396256	0.177211
580.2	0.0677	0.0007	0.0644	0.0235	0.0567		580.2	0.01769	0.01315	0.03245	0.05075	0.00294								580.2	0.0187774	0.0128658	0.0320166	0.0500478	0.00350895								580.2	0.672343	0.477357	0.931176	1.07153	0.140194		580.2	0.65852	0.369659	0.165317
582.3	0.0685	0.0026	0.0656	0.0236	0.0534		582.3	0.01853	0.01507	0.03367	0.05091	-0.000471533								582.3	0.0196174	0.0147858	0.0332366	0.0502078	9.74136e-05								582.3	0.70242	0.548594	0.966659	1.07495	0.00389199		582.3	0.659304	0.421578	0.188536
584.4	0.0686	0.0014	0.0667	0.0229	0.0492		584.4	0.01867	0.01389	0.0348	0.05027	-0.00478								584.4	0.0197574	0.0136058	0.0343666	0.0495678	-0.00421105								584.4	0.707433	0.504813	0.999524	1.06125	-0.168245		584.4	0.620955	0.495222	0.22147
586.5	0.0669	0.0022	0.0655	0.0266	0.0508		586.5	0.01701	0.01471	0.03363	0.05403	-0.00329								586.5	0.0180974	0.0144258	0.0331966	0.0533278	-0.00272105								586.5	0.647995	0.535237	0.965496	1.14175	-0.108715		586.5	0.636353	0.481989	0.215552
588.6	0.0695	0.0044	0.0631	0.0215	0.0541		588.6	0.01966	0.01693	0.03125	0.049	-9.26294e-05								588.6	0.0207474	0.0166458	0.0308166	0.0482978	0.000476317								588.6	0.742881	0.617605	0.896275	1.03406	0.0190304		588.6	0.661971	0.392185	0.175391
590.7	0.0695	0.0037	0.0638	0.0244	0.0595		590.7	0.0197	0.01625	0.03198	0.05196	0.0052								590.7	0.0207874	0.0159658	0.0315466	0.0512578	0.00576895								590.7	0.744313	0.592375	0.917507	1.09744	0.230488		590.7	0.716424	0.330871	0.14797
592.8	0.0692	-0.0006	0.0634	0.0269	0.0606		592.8	0.01944	0.01197	0.03161	0.05452	0.00619								592.8	0.0205274	0.0116858	0.0311766	0.0538178	0.00675895								592.8	0.735003	0.433575	0.906746	1.15225	0.270042		592.8	0.699522	0.355084	0.158799
594.9	0.0687	-0.0027	0.0633	0.0252	0.0607		594.9	0.01898	0.00989	0.03153	0.05288	0.00619								594.9	0.0200674	0.00960579	0.0310966	0.0521778	0.00675895								594.9	0.718533	0.356401	0.904419	1.11713	0.270042		594.9	0.673306	0.358989	0.160545
597	0.0686	-0.0007	0.0643	0.0277	0.0637		597	0.01892	0.01191	0.03256	0.05545	0.00908								597	0.0200074	0.0116258	0.0321266	0.0547478	0.00964895								597	0.716384	0.431349	0.934375	1.17216	0.385507		597	0.727955	0.333656	0.149215
599.1	0.0729	0.003	0.0598	0.0224	0.0634		599.1	0.02326	0.01563	0.02809	0.05021	0.00867								599.1	0.0243474	0.0153458	0.0276566	0.0495078	0.00923895								599.1	0.871782	0.569372	0.804369	1.05997	0.369126		599.1	0.734923	0.269454	0.120504
601.2	0.0713	0.0048	0.0584	0.0184	0.0629		601.2	0.0217	0.01745	0.02671	0.04627	0.00807								601.2	0.0227874	0.0171658	0.0262766	0.0455678	0.00863895								601.2	0.815925	0.636899	0.764233	0.975612	0.345154		601.2	0.707564	0.236187	0.105626
603.3	0.07	0.004	0.06	0.0194	0.0601		603.3	0.02044	0.01667	0.02834	0.04733	0.00516								603.3	0.0215274	0.0163858	0.0279066	0.0466278	0.00572895								603.3	0.770809	0.607958	0.81164	0.998307	0.22889		603.3	0.683521	0.289622	0.129523
605.4	0.0722	0.0062	0.0615	0.02	0.0578		605.4	0.02268	0.01889	0.02987	0.04799	0.00275								605.4	0.0237674	0.0186058	0.0294366	0.0472878	0.00331895								605.4	0.851015	0.690327	0.856139	1.01244	0.132603		605.4	0.708504	0.341494	0.152721
607.5	0.0702	0.0083	0.0599	0.0186	0.0565		607.5	0.02073	0.02101	0.02829	0.04666	0.00134								607.5	0.0218174	0.0207258	0.0278566	0.0459578	0.00190895								607.5	0.781193	0.768985	0.810186	0.983962	0.0762686		607.5	0.684119	0.35068	0.156829
609.6	0.0715	0.007	0.0586	0.0164	0.0599		609.6	0.02207	0.01973	0.02702	0.04452	0.00464								609.6	0.0231574	0.0194458	0.0265866	0.0438178	0.00520895								609.6	0.829173	0.721493	0.773249	0.938144	0.208114		609.6	0.694035	0.283284	0.126688
611.7	0.0734	0.0059	0.0629	0.0142	0.0606		611.7	0.02401	0.01865	0.03135	0.04238	0.00523								611.7	0.0250974	0.0183658	0.0309166	0.0416778	0.00579895								611.7	0.898637	0.681422	0.899184	0.892327	0.231687		611.7	0.720651	0.288812	0.129161
613.8	0.0688	0.0017	0.0635	0.0179	0.0599		613.8	0.01945	0.01446	0.03197	0.04614	0.00442								613.8	0.0205374	0.0141758	0.0315366	0.0454378	0.00498895								613.8	0.735361	0.525961	0.917216	0.972829	0.199325		613.8	0.670138	0.315981	0.141311
615.9	0.0702	0.0017	0.0644	0.0181	0.059		615.9	0.02089	0.01448	0.0329	0.0464	0.00342								615.9	0.0219774	0.0141958	0.0324666	0.0456978	0.00398895								615.9	0.786922	0.526703	0.944264	0.978395	0.159371		615.9	0.679131	0.340902	0.152456
618	0.072	0.0028	0.0598	0.0186	0.0601		618	0.02273	0.0156	0.02833	0.04697	0.00441								618	0.0238174	0.0153158	0.0278966	0.0462678	0.00497895								618	0.852805	0.568258	0.811349	0.990599	0.198925		618	0.684387	0.311211	0.139178
620.1	0.0737	0.0022	0.0614	0.0151	0.0583		620.1	0.02447	0.01502	0.02995	0.04353	0.0025								620.1	0.0255574	0.0147358	0.0295166	0.0428278	0.00306895								620.1	0.915107	0.546739	0.858466	0.916948	0.122614		620.1	0.671975	0.343287	0.153523
622.2	0.07	0.0034	0.0635	0.0135	0.054		622.2	0.02081	0.01624	0.03208	0.04199	-0.00191								622.2	0.0218974	0.0159558	0.0316466	0.0412878	-0.00134105								622.2	0.784058	0.592004	0.920415	0.883977	-0.0535794		622.2	0.625375	0.400374	0.179053
624.3	0.0693	0.0037	0.0637	0.0194	0.0527		624.3	0.02015	0.01656	0.03231	0.04795	-0.00331								624.3	0.0212374	0.0162758	0.0318766	0.0472478	-0.00274105								624.3	0.760426	0.603877	0.927104	1.01158	-0.109514		624.3	0.638695	0.446674	0.199759
626.4	0.0708	-0.0002	0.0642	0.0198	0.0547		626.4	0.0217	0.01268	0.03283	0.04841	-0.00142								626.4	0.0227874	0.0123958	0.0323966	0.0477078	-0.000851053								626.4	0.815925	0.459918	0.942228	1.02143	-0.0340024		626.4	0.6411	0.434305	0.194227
628.5	0.0723	0.0007	0.0642	0.0214	0.0592		628.5	0.02324	0.0136	0.03286	0.05008	0.00297								628.5	0.0243274	0.0133158	0.0324266	0.0493778	0.00353895								628.5	0.871066	0.494053	0.943101	1.05718	0.141392		628.5	0.701359	0.377621	0.168877
630.6	0.0735	0.0034	0.0613	0.0195	0.0627		630.6	0.02448	0.01632	0.02999	0.04824	0.00637								630.6	0.0255674	0.0160358	0.0295566	0.0475378	0.00693895								630.6	0.915465	0.594972	0.859629	1.01779	0.277234		630.6	0.733018	0.298835	0.133643
632.7	0.0716	-0.0008	0.0645	0.0209	0.0611		632.7	0.02262	0.01214	0.03321	0.0497	0.00466								632.7	0.0237074	0.0118558	0.0327766	0.0489978	0.00522895								632.7	0.848866	0.439883	0.95328	1.04905	0.208913		632.7	0.699998	0.359505	0.160775
634.8	0.07	-0.0028	0.0613	0.021	0.0611		634.8	0.02106	0.01016	0.03004	0.04986	0.00455								634.8	0.0221474	0.00987579	0.0296066	0.0491578	0.00511895								634.8	0.793009	0.366419	0.861083	1.05247	0.204519		634.8	0.655501	0.355568	0.159015
636.9	0.072	0.0027	0.0592	0.0214	0.0602		636.9	0.0231	0.01568	0.02796	0.05033	0.00355								636.9	0.0241874	0.0153958	0.0275266	0.0496278	0.00411895								636.9	0.866053	0.571227	0.800588	1.06254	0.164565		636.9	0.692994	0.343567	0.153648
639	0.0741	0.0037	0.0599	0.02	0.0615		639	0.02524	0.0167	0.02869	0.04899	0.00474								639	0.0263274	0.0164158	0.0282566	0.0482878	0.00530895								639	0.942678	0.609071	0.82182	1.03385	0.21211		639	0.723905	0.327351	0.146396
641.1	0.0705	0.0044	0.0593	0.0152	0.0642		641.1	0.02168	0.01742	0.02812	0.04425	0.00733								641.1	0.0227674	0.0171358	0.0276866	0.0435478	0.00789895								641.1	0.815209	0.635785	0.805242	0.932363	0.315589		641.1	0.700838	0.239913	0.107293
643.2	0.0721	0.0079	0.064	0.0152	0.0597		643.2	0.02333	0.02094	0.03284	0.04431	0.00272								643.2	0.0244174	0.0206558	0.0324066	0.0436078	0.00328895								643.2	0.874289	0.766387	0.942519	0.933648	0.131404		643.2	0.729649	0.341722	0.152823
645.3	0.0688	0.0053	0.0614	0.0169	0.0599		645.3	0.02007	0.01836	0.03027	0.04607	0.00282								645.3	0.0211574	0.0180758	0.0298366	0.0453678	0.00338895								645.3	0.757561	0.670662	0.867773	0.97133	0.135399		645.3	0.680545	0.325124	0.1454
647.4	0.0706	0.0033	0.0604	0.0169	0.0629		647.4	0.02191	0.01637	0.0293	0.04614	0.00571								647.4	0.0229974	0.0160858	0.0288666	0.0454378	0.00627895								647.4	0.823444	0.596828	0.839561	0.972829	0.250864		647.4	0.696705	0.283489	0.12678
649.5	0.0708	0.0056	0.0602	0.0151	0.0694		649.5	0.02215	0.01869	0.02912	0.0444	0.0121								649.5	0.0232374	0.0184058	0.0286866	0.0436978	0.0126689								649.5	0.832038	0.682906	0.834326	0.935575	0.506166		649.5	0.758202	0.167257	0.0747996
651.6	0.0731	0.0024	0.0605	0.0162	0.0655		651.6	0.02449	0.01551	0.02945	0.04556	0.0081								651.6	0.0255774	0.0152258	0.0290166	0.0448578	0.00866895								651.6	0.915823	0.564919	0.843924	0.960411	0.346353		651.6	0.726286	0.262186	0.117253
653.7	0.0736	-0.0002	0.0633	0.0227	0.0636		653.7	0.02503	0.01293	0.03228	0.05212	0.00609								653.7	0.0261174	0.0126458	0.0318466	0.0514178	0.00665895								653.7	0.935159	0.469194	0.926232	1.10086	0.266047		653.7	0.739498	0.353891	0.158265
655.8	0.0749	-0.0015	0.0611	0.0205	0.0621		655.8	0.02637	0.01165	0.0301	0.04998	0.00448								655.8	0.0274574	0.0113658	0.0296666	0.0492778	0.00504895								655.8	0.983139	0.421702	0.862828	1.05504	0.201722		655.8	0.704887	0.373613	0.167085
657.9	0.0738	0.0026	0.0623	0.0236	0.0633		657.9	0.02531	0.01577	0.03133	0.05315	0.00558								657.9	0.0263974	0.0154858	0.0308966	0.0524478	0.00614895								657.9	0.945184	0.574566	0.898602	1.12291	0.24567		657.9	0.757387	0.347885	0.155579
660	0.0721	0.0037	0.0633	0.018	0.0633		660	0.02365	0.01689	0.03236	0.04761	0.00547								660	0.0247374	0.0166058	0.0319266	0.0469078	0.00603895								660	0.885746	0.616121	0.928559	1.0043	0.241276		660	0.735201	0.312493	0.139751
662.1	0.0706	0.0086	0.0602	0.0151	0.0647		662.1	0.0222	0.02181	0.02928	0.04477	0.00676								662.1	0.0232874	0.0215258	0.0288466	0.0440678	0.00732895								662.1	0.833828	0.798667	0.838979	0.943497	0.292815		662.1	0.741557	0.25662	0.114764
664.2	0.0683	0.0094	0.06	0.0197	0.0605		664.2	0.01994	0.02263	0.02911	0.04943	0.00245								664.2	0.0210274	0.0223458	0.0286766	0.0487278	0.00301895								664.2	0.752906	0.829091	0.834035	1.04327	0.120617		664.2	0.715983	0.349882	0.156472
666.3	0.0667	0.007	0.0641	0.0236	0.0588		666.3	0.01838	0.02025	0.03324	0.05339	0.000647182								666.3	0.0194674	0.0199658	0.0328066	0.0526878	0.00121613								666.3	0.697049	0.740786	0.954153	1.12805	0.0485883		666.3	0.713726	0.410149	0.183424
668.4	0.0677	0.0071	0.0631	0.0185	0.0584		668.4	0.01942	0.02037	0.03226	0.04836	0.00014015								668.4	0.0205074	0.0200858	0.0318266	0.0476578	0.000709097								668.4	0.734287	0.745239	0.92565	1.02036	0.0283307		668.4	0.690773	0.389706	0.174282
670.5	0.0666	0.0105	0.0611	0.0192	0.0649		670.5	0.01836	0.02379	0.03029	0.04912	0.00653								670.5	0.0194474	0.0235058	0.0298566	0.0484178	0.00709895								670.5	0.696333	0.87213	0.868354	1.03663	0.283626		670.5	0.751415	0.287861	0.128735
672.6	0.0662	0.0079	0.0604	0.026	0.0656		672.6	0.018	0.02121	0.02962	0.05598	0.00713								672.6	0.0190874	0.0209258	0.0291866	0.0552778	0.00769895								672.6	0.683443	0.776405	0.848868	1.1835	0.307598		672.6	0.759964	0.315456	0.141076
674.7	0.0678	0.0016	0.0645	0.025	0.063		674.7	0.01964	0.01493	0.03374	0.05504	0.00442								674.7	0.0207274	0.0146458	0.0333066	0.0543378	0.00498895								674.7	0.742165	0.5434	0.968695	1.16338	0.199325		674.7	0.723392	0.374552	0.167505
676.8	0.0652	0.004	0.0594	0.0271	0.0612		676.8	0.01708	0.01735	0.02867	0.0572	0.00251								676.8	0.0181674	0.0170658	0.0282366	0.0564978	0.00307895								676.8	0.650501	0.633188	0.821238	1.20962	0.123014		676.8	0.687513	0.391619	0.175138
678.9	0.068	0.0072	0.0558	0.0209	0.0697		678.9	0.01992	0.02057	0.0251	0.05107	0.0109								678.9	0.0210074	0.0202858	0.0246666	0.0503678	0.0114689								678.9	0.75219	0.752659	0.717407	1.07838	0.458222		678.9	0.751772	0.220242	0.0984954
681	0.0727	0.0098	0.058	0.0169	0.0698		681	0.02467	0.02318	0.02732	0.04713	0.0109								681	0.0257574	0.0228958	0.0268866	0.0464278	0.0114689								681	0.922269	0.849498	0.781974	0.994025	0.458222		681	0.801197	0.20747	0.0927834
683.1	0.0693	0.0065	0.0584	0.016	0.0679		683.1	0.02131	0.0199	0.02775	0.04629	0.00889								683.1	0.0223974	0.0196158	0.0273166	0.0455878	0.00945895								683.1	0.801961	0.7278	0.794481	0.97604	0.377916		683.1	0.735639	0.220046	0.0984076
685.2	0.0688	0.0055	0.0615	0.0181	0.0691		685.2	0.02085	0.01892	0.03088	0.04845	0.00998								685.2	0.0219374	0.0186358	0.0304466	0.0477478	0.0105489								685.2	0.78549	0.69144	0.885514	1.02229	0.421465		685.2	0.761239	0.226106	0.101118
687.3	0.0686	0.0079	0.0566	0.0163	0.0679		687.3	0.02069	0.02134	0.026	0.04672	0.00868								687.3	0.0217774	0.0210558	0.0255666	0.0460178	0.00924895								687.3	0.779761	0.781228	0.743583	0.985246	0.369526		687.3	0.731869	0.223808	0.10009
689.4	0.0677	0.0105	0.0557	0.0178	0.0674		689.4	0.01983	0.02396	0.02513	0.04828	0.00807								689.4	0.0209174	0.0236758	0.0246966	0.0475778	0.00863895								689.4	0.748968	0.878438	0.71828	1.01865	0.345154		689.4	0.741897	0.251618	0.112527
691.5	0.0678	0.0108	0.058	0.0178	0.0671		691.5	0.01997	0.02428	0.02746	0.04834	0.00766								691.5	0.0210574	0.0239958	0.0270266	0.0476378	0.00822895								691.5	0.753981	0.890311	0.786046	1.01993	0.328773		691.5	0.755808	0.26035	0.116432
693.6	0.065	0.008	0.0622	0.021	0.0643		693.6	0.01721	0.0215	0.03168	0.0516	0.00476								693.6	0.0182974	0.0212158	0.0312466	0.0508978	0.00532895								693.6	0.655156	0.787165	0.908781	1.08973	0.212909		693.6	0.730748	0.330763	0.147922
695.7	0.0659	0.004	0.0602	0.0249	0.0619		695.7	0.01815	0.01752	0.02971	0.05556	0.00225								695.7	0.0192374	0.0172358	0.0292766	0.0548578	0.00281895								695.7	0.688814	0.639496	0.851486	1.17451	0.112626		695.7	0.693387	0.386227	0.172726
697.8	0.0686	0.0064	0.0593	0.0199	0.07		697.8	0.0209	0.01994	0.02884	0.05063	0.01024								697.8	0.0219874	0.0196558	0.0284066	0.0499278	0.0108089								697.8	0.78728	0.729285	0.826182	1.06896	0.431853		697.8	0.768712	0.228487	0.102183
699.9	0.0663	0.0069	0.0615	0.0158	0.0683		699.9	0.01864	0.02046	0.03106	0.04659	0.00843								699.9	0.0197274	0.0201758	0.0306266	0.0458878	0.00899895								699.9	0.706359	0.748578	0.890749	0.982463	0.359537		699.9	0.737537	0.238454	0.10664
702	0.0657	0.0064	0.0594	0.0142	0.0657		702	0.01808	0.01998	0.02899	0.04505	0.00573								702	0.0191674	0.0196958	0.0285566	0.0443478	0.00629895								702	0.686307	0.730769	0.830545	0.949492	0.251663		702	0.689755	0.265001	0.118512
704.1	0.065	0.0034	0.0627	0.0195	0.0649		704.1	0.01742	0.017	0.03231	0.05041	0.00482								704.1	0.0185074	0.0167158	0.0318766	0.0497078	0.00538895								704.1	0.662675	0.620202	0.927104	1.06425	0.215306		704.1	0.697908	0.326696	0.146103
706.2	0.0642	0.0056	0.0637	0.023	0.0622		706.2	0.01666	0.01922	0.03334	0.05397	0.00201								706.2	0.0177474	0.0189358	0.0329066	0.0532678	0.00257895								706.2	0.635463	0.702571	0.957061	1.14047	0.103037		706.2	0.70772	0.393806	0.176115
708.3	0.0657	0.0043	0.0652	0.0233	0.0686		708.3	0.0182	0.01794	0.03487	0.05434	0.00831								708.3	0.0192874	0.0176558	0.0344366	0.0536378	0.00887895								708.3	0.690604	0.655079	1.00156	1.14839	0.354743		708.3	0.770075	0.311749	0.139418
710.4	0.0659	0.0017	0.064	0.0208	0.0671		710.4	0.01844	0.01536	0.03369	0.0519	0.0067								710.4	0.0195274	0.0150758	0.0332566	0.0511978	0.00726895								710.4	0.699197	0.559354	0.967241	1.09615	0.290418		710.4	0.722472	0.321468	0.143765
712.5	0.0644	0.0034	0.0614	0.0244	0.0677		712.5	0.01698	0.01708	0.03112	0.05556	0.00719								712.5	0.0180674	0.0167958	0.0306866	0.0548578	0.00775895								712.5	0.646921	0.623171	0.892494	1.17451	0.309995		712.5	0.729419	0.32354	0.144691
714.6	0.0623	0.0027	0.0619	0.0286	0.0634		714.6	0.01492	0.01639	0.03165	0.05982	0.00279								714.6	0.0160074	0.0161058	0.0312166	0.0591178	0.00335895								714.6	0.57316	0.59757	0.907909	1.26572	0.134201		714.6	0.695712	0.421272	0.188399
716.7	0.0659	0.0022	0.0595	0.024	0.0641		716.7	0.01857	0.01591	0.02927	0.05528	0.00338								716.7	0.0196574	0.0156258	0.0288366	0.0545778	0.00394895								716.7	0.703852	0.57976	0.838689	1.16852	0.157773		716.7	0.689718	0.369695	0.165332
718.8	0.0656	0.003	0.0619	0.0247	0.0677		718.8	0.01831	0.01673	0.0317	0.05605	0.00687								718.8	0.0193974	0.0164458	0.0312666	0.0553478	0.00743895								718.8	0.694543	0.610185	0.909363	1.185	0.29721		718.8	0.739261	0.332299	0.148609
720.9	0.0613	0.005	0.0609	0.0198	0.067		720.9	0.01405	0.01875	0.03073	0.05121	0.00606								720.9	0.0151374	0.0184658	0.0302966	0.0505078	0.00662895								720.9	0.542009	0.685132	0.881151	1.08138	0.264848		720.9	0.690904	0.313205	0.14007
723	0.0637	0.001	0.0616	0.0192	0.0694		723	0.01649	0.01477	0.03145	0.05067	0.00836								723	0.0175774	0.0144858	0.0310166	0.0499678	0.00892895								723	0.629376	0.537463	0.902092	1.06982	0.35674		723	0.699098	0.285847	0.127835
725.1	0.0649	0.0031	0.0601	0.021	0.0715		725.1	0.01773	0.01689	0.02998	0.05253	0.01035								725.1	0.0188174	0.0166058	0.0295466	0.0518278	0.0109189								725.1	0.673775	0.616121	0.859338	1.10964	0.436247		725.1	0.739024	0.256353	0.114645
727.2	0.065	0.0047	0.0626	0.0179	0.0742		727.2	0.01787	0.01851	0.03251	0.04949	0.01294								727.2	0.0189574	0.0182258	0.0320766	0.0487878	0.0135089								727.2	0.678788	0.676228	0.932921	1.04455	0.539726		727.2	0.774443	0.207342	0.0927261
729.3	0.063	0.0057	0.0615	0.0171	0.0774		729.3	0.01591	0.01953	0.03143	0.04876	0.01604								729.3	0.0169974	0.0192458	0.0309966	0.0480578	0.0166089								729.3	0.608608	0.714072	0.90151	1.02892	0.663581		729.3	0.783339	0.17603	0.0787231
731.4	0.0637	0.0086	0.0628	0.0164	0.075		731.4	0.01665	0.02245	0.03276	0.04812	0.01353								731.4	0.0177374	0.0221658	0.0323266	0.0474178	0.0140989								731.4	0.635105	0.822413	0.940192	1.01522	0.563299		731.4	0.795246	0.193379	0.0864815
733.5	0.0641	0.004	0.0644	0.0214	0.0719		733.5	0.01709	0.01787	0.03439	0.05318	0.01032								733.5	0.0181774	0.0175858	0.0339566	0.0524778	0.0108889								733.5	0.650859	0.652482	0.9876	1.12356	0.435049		733.5	0.769909	0.27953	0.12501
735.6	0.063	0.0041	0.0649	0.023	0.0676		735.6	0.01604	0.01799	0.03491	0.05484	0.00592								735.6	0.0171274	0.0177058	0.0344766	0.0541378	0.00648895								735.6	0.613263	0.656934	1.00272	1.1591	0.259255		735.6	0.738254	0.353104	0.157913
737.7	0.0627	0.0021	0.0636	0.0221	0.0681		737.7	0.01578	0.01601	0.03364	0.05401	0.00631								737.7	0.0168674	0.0157258	0.0332066	0.0533078	0.00687895								737.7	0.603954	0.583471	0.965786	1.14133	0.274836		737.7	0.713875	0.342059	0.152973
739.8	0.0645	0.0053	0.064	0.0199	0.0701		739.8	0.01762	0.01923	0.03407	0.05187	0.0082								739.8	0.0187074	0.0189458	0.0336366	0.0511678	0.00876895								739.8	0.669837	0.702942	0.978293	1.09551	0.350348		739.8	0.759385	0.291297	0.130272
741.9	0.0621	0.0036	0.0626	0.0186	0.0681		741.9	0.01526	0.01755	0.03269	0.05063	0.00609								741.9	0.0163474	0.0172658	0.0322566	0.0499278	0.00665895								741.9	0.585334	0.640609	0.938156	1.06896	0.266047		741.9	0.699821	0.315373	0.141039
744	0.0643	0.003	0.0672	0.0234	0.0701		744	0.0175	0.01697	0.03732	0.05549	0.00799								744	0.0185874	0.0166858	0.0368866	0.0547878	0.00855895								744	0.66554	0.619089	1.07282	1.17301	0.341958		744	0.774483	0.343119	0.153448
746.1	0.0615	0.003	0.0647	0.0235	0.0715		746.1	0.01474	0.01699	0.03485	0.05565	0.00928								746.1	0.0158274	0.0167058	0.0344166	0.0549478	0.00984895								746.1	0.566715	0.619831	1.00098	1.17644	0.393497		746.1	0.751492	0.324985	0.145338
748.2	0.0636	0.005	0.0672	0.0208	0.0711		748.2	0.01688	0.019	0.03737	0.05302	0.00877								748.2	0.0179674	0.0187158	0.0369366	0.0523178	0.00933895								748.2	0.64334	0.694408	1.07427	1.12013	0.373121		748.2	0.781054	0.31378	0.140326
750.3	0.0622	0.0109	0.0649	0.0188	0.0711		750.3	0.01552	0.02492	0.0351	0.05108	0.00867								750.3	0.0166074	0.0246358	0.0346666	0.0503778	0.00923895								750.3	0.594644	0.914056	1.00825	1.07859	0.369126		750.3	0.792934	0.300652	0.134455
752.4	0.06	0.0081	0.064	0.0204	0.0659		752.4	0.01337	0.02214	0.03423	0.05274	0.00336								752.4	0.0144574	0.0218558	0.0337966	0.0520378	0.00392895								752.4	0.517661	0.810911	0.982946	1.11414	0.156974		752.4	0.716526	0.384261	0.171847
754.5	0.062	0.0064	0.0605	0.0238	0.0612		754.5	0.01541	0.02046	0.03075	0.0562	-0.00145								754.5	0.0164974	0.0201758	0.0303166	0.0554978	-0.000881053								754.5	0.590705	0.748578	0.881733	1.18821	-0.035201		754.5	0.674806	0.453606	0.202859
756.6	0.065	0.0031	0.0587	0.0259	0.0626		756.6	0.01845	0.01718	0.02898	0.05836	-0.0001552								756.6	0.0195374	0.0168958	0.0285466	0.0576578	0.000413747								756.6	0.699555	0.626881	0.830254	1.23446	0.0165305		756.6	0.681536	0.439712	0.196645
758.7	0.0629	0.0008	0.0581	0.0242	0.0695		758.7	0.01639	0.0149	0.02841	0.05673	0.00664								758.7	0.0174774	0.0146158	0.0279766	0.0560278	0.00720895								758.7	0.625795	0.542286	0.813676	1.19956	0.288021		758.7	0.693868	0.340001	0.152053
760.8	0.0627	0.0033	0.0613	0.02	0.0747		760.8	0.01623	0.01742	0.03163	0.05259	0.01173								760.8	0.0173174	0.0171358	0.0311966	0.0518878	0.0122989								760.8	0.620066	0.635785	0.907327	1.11092	0.491383		760.8	0.753097	0.250889	0.112201
762.9	0.0585	0.0038	0.0564	0.0202	0.0757		762.9	0.01207	0.01794	0.02676	0.05285	0.01262								762.9	0.0131574	0.0176558	0.0263266	0.0521478	0.0131889								762.9	0.471113	0.655079	0.765687	1.11649	0.526941		762.9	0.707062	0.255874	0.11443
765	0.0608	0.0024	0.0661	0.019	0.0812		765	0.01441	0.01656	0.03649	0.05171	0.01802								765	0.0154974	0.0162758	0.0360566	0.0510078	0.0185889								765	0.554899	0.603877	1.04868	1.09208	0.742689		765	0.808445	0.249308	0.111494
767.1	0.0592	0.0072	0.0666	0.0198	0.0812		767.1	0.01285	0.02138	0.03701	0.05257	0.01791								767.1	0.0139374	0.0210958	0.0365766	0.0518678	0.0184789								767.1	0.499042	0.782713	1.0638	1.1105	0.738294		767.1	0.838869	0.251558	0.1125
769.2	0.0592	0.0062	0.0602	0.012	0.0797		769.2	0.01289	0.0204	0.03064	0.04484	0.0163								769.2	0.0139774	0.0201158	0.0302066	0.0441378	0.0168689								769.2	0.500474	0.746352	0.878534	0.944995	0.673969		769.2	0.748865	0.175068	0.0782926
771.3	0.0608	0.0114	0.0624	0.0135	0.0758		771.3	0.01454	0.02562	0.03286	0.0464	0.0123								771.3	0.0156274	0.0253358	0.0324266	0.0456978	0.0128689								771.3	0.559554	0.940028	0.943101	0.978395	0.514156		771.3	0.787047	0.229452	0.102614
773.4	0.0598	0.0051	0.0624	0.0114	0.0708		773.4	0.01358	0.01934	0.03289	0.04436	0.00719								773.4	0.0146674	0.0190558	0.0324566	0.0436578	0.00775895								773.4	0.52518	0.707023	0.943973	0.934719	0.309995		773.4	0.684178	0.272066	0.121671
775.5	0.0628	0.0022	0.0629	0.0165	0.0674		775.5	0.01662	0.01646	0.03342	0.04952	0.00368								775.5	0.0177074	0.0161758	0.0329866	0.0488178	0.00424895								775.5	0.634031	0.600167	0.959388	1.04519	0.169759		775.5	0.681708	0.346498	0.154958
777.6	0.059	-0.001	0.0636	0.0173	0.0707		777.6	0.01286	0.01328	0.03414	0.05038	0.00687								777.6	0.0139474	0.0129958	0.0337066	0.0496778	0.00743895								777.6	0.4994	0.48218	0.980329	1.06361	0.29721		777.6	0.664545	0.337059	0.150737
779.7	0.0592	0.0013	0.0585	0.0148	0.0724		779.7	0.0131	0.0156	0.02907	0.04795	0.00847								779.7	0.0141874	0.0153158	0.0286366	0.0472478	0.00903895								779.7	0.507994	0.568258	0.832872	1.01158	0.361135		779.7	0.656368	0.261854	0.117105
781.8	0.0515	-0.0055	0.053	0.0037	0.0695		781.8	0.00544	0.00881	0.0236	0.03691	0.00546								781.8	0.0065274	0.00852579	0.0231666	0.0362078	0.00602895								781.8	0.23372	0.31633	0.673781	0.775213	0.240876		781.8	0.447984	0.257001	0.114934
783.9	0.0477	-0.009	0.0522	0.0024	0.0657		783.9	0.00168	0.00533	0.02282	0.03567	0.00155								783.9	0.0027674	0.00504579	0.0223866	0.0349678	0.00211895								783.9	0.0990895	0.187213	0.651095	0.748665	0.0846588		783.9	0.354144	0.319909	0.143068
786	0.046	-0.0101	0.0507	0.0016	0.062		786	2.38214e-05	0.00425	0.02135	0.03493	-0.00225								786	0.00111123	0.00396579	0.0209166	0.0342278	-0.00168105								786	0.0397885	0.147142	0.608342	0.732821	-0.0671636		786	0.292186	0.356366	0.159372
788.1	0.0458	-0.0063	0.0467	-0.0013	0.0605		788.1	-0.000135023	0.00807	0.01738	0.0321	-0.00386								788.1	0.000952381	0.00778579	0.0169466	0.0313978	-0.00329105								788.1	0.0341009	0.288874	0.492878	0.67223	-0.131488		788.1	0.271319	0.327358	0.146399
790.2	0.0474	-0.0028	0.045	-0.0078	0.0586		790.2	0.00151	0.01159	0.0157	0.02566	-0.00587								790.2	0.0025974	0.0113058	0.0152666	0.0249578	-0.00530105								790.2	0.0930025	0.419476	0.444016	0.534349	-0.211794		790.2	0.25581	0.310223	0.138736
792.3	0.0451	-0.0048	0.0443	-0.0102	0.0547		792.3	-0.00075271	0.00961	0.01503	0.02332	-0.00987								792.3	0.000334694	0.00932579	0.0145966	0.0226178	-0.00930105								792.3	0.011984	0.346013	0.42453	0.484249	-0.371607		792.3	0.179034	0.357917	0.160065
794.4	0.0434	-0.0081	0.0415	-0.0067	0.0538		794.4	-0.00241	0.00633	0.01226	0.02688	-0.01088								794.4	-0.0013226	0.00604579	0.0118266	0.0261778	-0.0103111								794.4	-0.0473568	0.224316	0.343966	0.560469	-0.41196		794.4	0.133887	0.37586	0.16809
796.5	0.0408	-0.0102	0.0448	-0.0063	0.0601		796.5	-0.00497	0.00425	0.01558	0.02734	-0.00469								796.5	-0.0038826	0.00396579	0.0151466	0.0266378	-0.00412105								796.5	-0.13902	0.147142	0.440526	0.570318	-0.164649		796.5	0.170863	0.332205	0.148567
798.6	0.0413	-0.0135	0.044	-0.0109	0.0676		798.6	-0.00443	0.000969998	0.01481	0.02281	0.0027								798.6	-0.0033426	0.000685784	0.0143766	0.0221078	0.00326895								798.6	-0.119685	0.0254445	0.418131	0.47333	0.130605		798.6	0.185565	0.254329	0.113739
800.7	0.0444	-0.0116	0.0435	-0.0097	0.0692		800.7	-0.00129	0.00289	0.01434	0.02407	0.0042								800.7	-0.000202596	0.00260579	0.0139066	0.0233678	0.00476895								800.7	-0.00725415	0.0966819	0.404462	0.500307	0.190535		800.7	0.236946	0.211472	0.0945733
802.8	0.0377	-0.0083	0.0433	-0.0119	0.0655		802.8	-0.00795	0.00621	0.01416	0.02193	0.000390093								802.8	-0.0068626	0.00592579	0.0137266	0.0212278	0.00095904								802.8	-0.245722	0.219863	0.399226	0.454489	0.0383168		802.8	0.173235	0.285516	0.127687
804.9	0.0399	-0.0074	0.0414	-0.0128	0.0613		804.9	-0.00571	0.00713	0.01229	0.02109	-0.00392								804.9	-0.0046226	0.00684579	0.0118566	0.0203878	-0.00335105								804.9	-0.165516	0.253998	0.344839	0.436505	-0.133885		804.9	0.147188	0.278821	0.124693
807	0.0384	-0.0098	0.0391	-0.0192	0.0626		807	-0.00716	0.00475	0.01002	0.01475	-0.00272								807	-0.0060726	0.00446579	0.00958658	0.0140478	-0.00215105								807	-0.217435	0.165693	0.278818	0.300765	-0.0859416		807	0.0883798	0.229816	0.102777
809.1	0.0407	-0.0064	0.0365	-0.0222	0.0636		809.1	-0.00482	0.00817	0.00744	0.01182	-0.00183								809.1	-0.0037326	0.00788579	0.00700658	0.0111178	-0.00126105								809.1	-0.133649	0.292585	0.203781	0.238033	-0.0503832		809.1	0.110073	0.189481	0.0847384
811.2	0.0424	-0.0073	0.0369	-0.0226	0.0586		811.2	-0.00308	0.00729	0.00787	0.01148	-0.00694								811.2	-0.0019926	0.00700579	0.00743658	0.0107778	-0.00637105								811.2	-0.0713468	0.259934	0.216287	0.230753	-0.254544		811.2	0.0762167	0.228271	0.102086
813.3	0.0412	-0.0112	0.0385	-0.023	0.0549		813.3	-0.00424	0.00341	0.0095	0.01114	-0.01075								813.3	-0.0031526	0.00312579	0.00906658	0.0104378	-0.0101811								813.3	-0.112882	0.115975	0.263694	0.223474	-0.406766		813.3	0.0166991	0.278268	0.124445
815.4	0.0426	-0.0117	0.0395	-0.0244	0.0592		815.4	-0.0028	0.00293	0.01052	0.0098	-0.00655								815.4	-0.0017126	0.00264579	0.0100866	0.00909777	-0.00598105								815.4	-0.0613211	0.098166	0.29336	0.194784	-0.238963		815.4	0.0572054	0.211032	0.0943766
817.5	0.0415	-0.0129	0.0387	-0.0214	0.0645		817.5	-0.00386	0.00174	0.00975	0.01286	-0.00136								817.5	-0.0027726	0.00145579	0.00931658	0.0121578	-0.000791053								817.5	-0.0992755	0.0540137	0.270965	0.260299	-0.0316052		817.5	0.0908795	0.168563	0.0753838
819.6	0.0417	-0.0122	0.0381	-0.0264	0.0687		819.6	-0.00362	0.00246	0.00918	0.00793	0.00273								819.6	-0.0025326	0.00217579	0.00874658	0.00722777	0.00329895								819.6	-0.090682	0.0807277	0.254387	0.154748	0.131804		819.6	0.106197	0.126869	0.0567376
821.7	0.0378	-0.0124	0.0409	-0.0214	0.0637		821.7	-0.00748	0.00228	0.012	0.01299	-0.00237								821.7	-0.0063926	0.00199579	0.0115666	0.0122878	-0.00180105								821.7	-0.228893	0.0740492	0.336405	0.263083	-0.0719579		821.7	0.0745371	0.233268	0.10432
823.8	0.0371	-0.0106	0.0406	-0.0233	0.0605		823.8	-0.00814	0.0041	0.01173	0.01115	-0.00568								823.8	-0.0070526	0.00381579	0.0112966	0.0104478	-0.00511105								823.8	-0.252525	0.141576	0.328552	0.223688	-0.204203		823.8	0.0474176	0.260889	0.116673
825.9	0.0358	-0.0097	0.0407	-0.0233	0.0542		825.9	-0.00939	0.00502	0.01186	0.01121	-0.01209								825.9	-0.0083026	0.00473579	0.0114266	0.0105078	-0.0115211								825.9	-0.297282	0.175711	0.332333	0.224973	-0.460304		825.9	-0.00491392	0.350738	0.156855
828	0.0374	-0.0079	0.0365	-0.0266	0.053		828	-0.00775	0.00684	0.00768	0.00797	-0.01339								828	-0.0066626	0.00655579	0.00724658	0.00726777	-0.0128211								828	-0.238561	0.243238	0.210761	0.155604	-0.512243		828	-0.0282401	0.332834	0.148848
830.1	0.0343	-0.0093	0.0385	-0.0286	0.0547		830.1	-0.01081	0.00546	0.00971	0.00604	-0.0118								830.1	-0.0097226	0.00517579	0.00927658	0.00533777	-0.0112311								830.1	-0.348127	0.192036	0.269802	0.114282	-0.448717		830.1	-0.0441448	0.329972	0.147568
832.2	0.0347	-0.0088	0.0406	-0.0281	0.0509		832.2	-0.01037	0.00598	0.01184	0.0066	-0.01571								832.2	-0.0092826	0.00569579	0.0114066	0.00589777	-0.0151411								832.2	-0.332372	0.21133	0.331751	0.126272	-0.604934		832.2	-0.0535908	0.397719	0.177865
834.3	0.0327	-0.0137	0.0422	-0.0257	0.05		834.3	-0.01233	0.0011	0.01346	0.00906	-0.01672								834.3	-0.0112426	0.000815786	0.0130266	0.00835777	-0.0161511								834.3	-0.402552	0.0302679	0.378867	0.178941	-0.645287		834.3	-0.0919525	0.422091	0.188765
836.4	0.0334	-0.0174	0.0376	-0.0242	0.0526		836.4	-0.01159	-0.00258	0.00889	0.01062	-0.01422								836.4	-0.0105026	-0.00286421	0.00845658	0.00991777	-0.0136511								836.4	-0.376056	-0.10627	0.245953	0.212341	-0.545404		836.4	-0.113887	0.350324	0.156669
838.5	0.032	-0.018	0.0357	-0.0229	0.0606		838.5	-0.01295	-0.00316	0.00701	0.01199	-0.00633								838.5	-0.0118626	-0.00344421	0.00657658	0.0112878	-0.00576105								838.5	-0.424752	-0.12779	0.191274	0.241673	-0.230173		838.5	-0.0699535	0.282952	0.12654
840.6	0.0331	-0.0135	0.032	-0.0229	0.0608		840.6	-0.01181	0.00136	0.00334	0.01205	-0.00624								840.6	-0.0107226	0.00107579	0.00290658	0.0113478	-0.00567105								840.6	-0.383933	0.0399147	0.0845355	0.242957	-0.226577		840.6	-0.0486205	0.252334	0.112847
842.7	0.0322	-0.012	0.0337	-0.0242	0.0599		842.7	-0.01266	0.00288	0.00507	0.01081	-0.00724								842.7	-0.0115726	0.00259579	0.00463658	0.0101078	-0.00667105								842.7	-0.414368	0.0963109	0.134851	0.216409	-0.26653		842.7	-0.0466655	0.276651	0.123722
844.8	0.0355	-0.0129	0.033	-0.0217	0.0619		844.8	-0.00932	0.002	0.00439	0.01337	-0.00535								844.8	-0.0082326	0.00171579	0.00395658	0.0126678	-0.00478105								844.8	-0.294776	0.0636604	0.115074	0.271219	-0.191019		844.8	-0.00716834	0.231289	0.103436
846.9	0.0349	-0.0099	0.0352	-0.0254	0.0602		846.9	-0.00988	0.00502	0.00662	0.00973	-0.00716								846.9	-0.0087926	0.00473579	0.00618658	0.00902777	-0.00659105								846.9	-0.314827	0.175711	0.179932	0.193286	-0.263334		846.9	-0.00584662	0.259277	0.115952
849	0.0344	-0.0117	0.0323	-0.0288	0.0612		849	-0.01034	0.00324	0.00375	0.0064	-0.00626								849	-0.0092526	0.00295579	0.00331658	0.00569777	-0.00569105								849	-0.331298	0.109668	0.09646	0.12199	-0.227376		849	-0.0461112	0.216241	0.0967058
851.1	0.0367	-0.0124	0.0333	-0.0331	0.0613		851.1	-0.008	0.00255	0.00477	0.00216	-0.00627								851.1	-0.0069126	0.00226579	0.00433658	0.00145777	-0.00570105								851.1	-0.247512	0.084067	0.126126	0.0312111	-0.227776		851.1	-0.0467768	0.17759	0.0794207
853.2	0.0345	-0.013	0.0373	-0.0354	0.0556		853.2	-0.01016	0.00197	0.0088	-8.01691e-05	-0.01208								853.2	-0.0090726	0.00168579	0.00836658	-0.000782398	-0.0115111								853.2	-0.324853	0.0625474	0.243335	-0.0167512	-0.459904		853.2	-0.0991252	0.287801	0.128708
855.3	0.0324	-0.0156	0.0388	-0.032	0.0591		855.3	-0.01222	-0.000606725	0.01033	0.00338	-0.00869								855.3	-0.0111326	-0.000890939	0.00989658	0.00267777	-0.00812105								855.3	-0.398613	-0.0330563	0.287834	0.0573314	-0.324463		855.3	-0.0821933	0.281788	0.126019
857.4	0.0343	-0.0136	0.0331	-0.0288	0.0623		857.4	-0.01028	0.00141	0.00465	0.00664	-0.00559								857.4	-0.0091926	0.00112579	0.00421658	0.00593777	-0.00502105								857.4	-0.32915	0.0417698	0.122636	0.127128	-0.200607		857.4	-0.0476446	0.206264	0.0922439
859.5	0.0343	-0.0126	0.0333	-0.0301	0.0633		859.5	-0.01024	0.00243	0.00488	0.00541	-0.0047								859.5	-0.0091526	0.00214579	0.00444658	0.00470777	-0.00413105								859.5	-0.327717	0.0796146	0.129325	0.100794	-0.165049		859.5	-0.0366065	0.200725	0.0897671
861.6	0.0354	-0.0152	0.0362	-0.0298	0.0614		861.6	-0.00909	-0.000148583	0.00781	0.00577	-0.00671								861.6	-0.0080026	-0.000432797	0.00737658	0.00506777	-0.00614105								861.6	-0.286541	-0.016058	0.214542	0.108502	-0.245355		861.6	-0.044982	0.218086	0.0975311
863.7	0.0341	-0.0103	0.0364	-0.0274	0.058		863.7	-0.01035	0.00477	0.00803	0.00823	-0.01021								863.7	-0.0092626	0.00448579	0.00759658	0.00752777	-0.00964105								863.7	-0.331656	0.166435	0.22094	0.161171	-0.385191		863.7	-0.0336603	0.297991	0.133266
865.8	0.034	-0.0141	0.0384	-0.0245	0.0535		865.8	-0.01041	0.000990178	0.01006	0.01119	-0.01482								865.8	-0.0093226	0.000705964	0.00962658	0.0104878	-0.0142511								865.8	-0.333804	0.0261932	0.279981	0.224545	-0.569376		865.8	-0.0744923	0.366526	0.163915
867.9	0.0364	-0.0157	0.0363	-0.0255	0.0517		867.9	-0.00797	-0.000590442	0.00799	0.01025	-0.01673								867.9	-0.0068826	-0.000874656	0.00755658	0.00954777	-0.0161611								867.9	-0.246438	-0.0324522	0.219777	0.204419	-0.645687		867.9	-0.100076	0.360107	0.161045
870	0.0366	-0.0115	0.0344	-0.0315	0.0492		870	-0.00773	0.00363	0.00611	0.00432	-0.01933								870	-0.0066426	0.00334579	0.00567658	0.00361777	-0.0187611								870	-0.237845	0.124138	0.165099	0.077457	-0.749565		870	-0.124143	0.384066	0.17176
872.1	0.0348	-0.0142	0.0342	-0.0307	0.0495		872.1	-0.00949	0.00094832	0.00594	0.00518	-0.01914								872.1	-0.0084026	0.000664106	0.00550658	0.00447777	-0.0185711								872.1	-0.300863	0.0246402	0.160154	0.0958697	-0.741974		872.1	-0.152435	0.374269	0.167378
874.2	0.0322	-0.0184	0.038	-0.0313	0.0463		874.2	-0.01205	-0.00323	0.00977	0.00464	-0.02245								874.2	-0.0109626	-0.00351421	0.00933658	0.00393777	-0.0218811								874.2	-0.392526	-0.130387	0.271547	0.0843082	-0.874219		874.2	-0.208256	0.447027	0.199916
876.3	0.0328	-0.0159	0.0378	-0.0281	0.0571		876.3	-0.01141	-0.000712919	0.00959	0.0079	-0.01176								876.3	-0.0103226	-0.000997133	0.00915658	0.00719777	-0.0111911								876.3	-0.36961	-0.0369964	0.266312	0.154105	-0.447119		876.3	-0.0866618	0.314251	0.140537
878.4	0.0322	-0.0164	0.0379	-0.0297	0.0665		878.4	-0.01197	-0.00119	0.00972	0.00636	-0.00246								878.4	-0.0108826	-0.00147421	0.00928658	0.00565777	-0.00189105								878.4	-0.389662	-0.0546975	0.270093	0.121134	-0.0755537		878.4	-0.0257374	0.24741	0.110645
880.5	0.0328	-0.012	0.0397	-0.0297	0.0695		880.5	-0.01132	0.00323	0.01155	0.00643	0.000429904								880.5	-0.0102326	0.00294579	0.0111166	0.00572777	0.000998851								880.5	-0.366388	0.109297	0.323317	0.122632	0.0399073		880.5	0.0457531	0.253419	0.113332
882.6	0.0316	-0.0094	0.0352	-0.029	0.0671		882.6	-0.01248	0.00585	0.00707	0.00719	-0.00208								882.6	-0.0113926	0.00556579	0.00663658	0.00648777	-0.00151105								882.6	-0.407923	0.206506	0.19302	0.138904	-0.0603715		882.6	0.0140271	0.258968	0.115814
884.7	0.0312	-0.0114	0.037	-0.0302	0.0652		884.7	-0.01284	0.00386	0.0089	0.00605	-0.00408								884.7	-0.0117526	0.00357579	0.00846658	0.00534777	-0.00351105								884.7	-0.420813	0.132672	0.246244	0.114496	-0.140278		884.7	-0.0135359	0.267952	0.119832
886.8	0.0324	-0.0156	0.0369	-0.0312	0.0599		886.8	-0.0116	-0.000316016	0.00883	0.00511	-0.00949								886.8	-0.0105126	-0.00060023	0.00839658	0.00440777	-0.00892105								886.8	-0.376414	-0.0222702	0.244208	0.094371	-0.356425		886.8	-0.0833061	0.275257	0.123099
888.9	0.0314	-0.0083	0.0342	-0.0365	0.0583		888.9	-0.01256	0.007	0.00615	-0.000124714	-0.0112								888.9	-0.0114726	0.00671579	0.00571658	-0.000826943	-0.0106311								888.9	-0.410787	0.249174	0.166262	-0.017705	-0.424745		888.9	-0.0875602	0.31657	0.141574
891	0.033	-0.0109	0.0359	-0.0364	0.0567		891	-0.01092	0.00442	0.00788	3.73716e-05	-0.01291								891	-0.0098326	0.00413579	0.00744658	-0.000664857	-0.0123411								891	-0.352066	0.153449	0.216578	-0.0142347	-0.493065		891	-0.0978677	0.312181	0.139612
893.1	0.0321	-0.0103	0.0335	-0.0364	0.0579		893.1	-0.01178	0.00504	0.00551	9.94572e-05	-0.01181								893.1	-0.0106926	0.00475579	0.00507658	-0.000602772	-0.0112411								893.1	-0.382859	0.176453	0.147648	-0.0129054	-0.449117		893.1	-0.104156	0.294596	0.131747
895.2	0.0333	-0.015	0.0357	-0.0333	0.059		895.2	-0.01054	0.000361506	0.00773	0.00326	-0.01082								895.2	-0.0094526	7.72917e-05	0.00729658	0.00255777	-0.0102511								895.2	-0.338459	0.00286774	0.212215	0.0547622	-0.409563		895.2	-0.0956354	0.266743	0.119291
897.3	0.0319	-0.0164	0.0374	-0.0343	0.0669		897.3	-0.01189	-0.00102	0.00946	0.00232	-0.00303								897.3	-0.0108026	-0.00130421	0.00902658	0.00161777	-0.00246105								897.3	-0.386797	-0.04839	0.262531	0.0346367	-0.0983271		897.3	-0.0472694	0.234826	0.105017
899.4	0.0337	-0.0088	0.0381	-0.0313	0.0704		899.4	-0.01005	0.0066	0.01019	0.00539	0.000366615								899.4	-0.0089626	0.00631579	0.00975658	0.00468777	0.000935562								899.4	-0.320914	0.234333	0.283762	0.100366	0.0373787		899.4	0.0669851	0.238461	0.106643
901.5	0.0333	-0.0115	0.0351	-0.0323	0.0626		901.5	-0.01041	0.00392	0.00721	0.00445	-0.00754								901.5	-0.0093226	0.00363579	0.00677658	0.00374777	-0.00697105								901.5	-0.333804	0.134898	0.197091	0.0802403	-0.278516		901.5	-0.0400183	0.24722	0.11056
903.6	0.0294	-0.0112	0.0412	-0.0321	0.0592		903.6	-0.01427	0.00424	0.01334	0.00471	-0.01105								903.6	-0.0131826	0.00395579	0.0129066	0.00400777	-0.0104811								903.6	-0.472015	0.146771	0.375377	0.0858069	-0.418752		903.6	-0.0565625	0.371473	0.166128
905.7	0.0304	-0.0138	0.0401	-0.031	0.0541		905.7	-0.01323	0.00166	0.01226	0.00587	-0.01625								905.7	-0.0121426	0.00137579	0.0118266	0.00516777	-0.0156811								905.7	-0.434777	0.0510455	0.343966	0.110643	-0.626509		905.7	-0.111126	0.40403	0.180688
907.8	0.0321	-0.0119	0.039	-0.0304	0.0541		907.8	-0.01149	0.00358	0.01119	0.00653	-0.01636								907.8	-0.0104026	0.00329579	0.0107566	0.00582777	-0.0157911								907.8	-0.372475	0.122283	0.312846	0.124773	-0.630904		907.8	-0.0886953	0.395549	0.176895
909.9	0.0313	-0.0112	0.034	-0.0345	0.0587		909.9	-0.01225	0.0043	0.00622	0.0025	-0.01187								909.9	-0.0111626	0.00401579	0.00578658	0.00179777	-0.0113011								909.9	-0.399687	0.148997	0.168298	0.0384905	-0.451514		909.9	-0.0990832	0.30271	0.135376
912	0.0316	-0.0135	0.0391	-0.0331	0.0547		912	-0.01191	0.00202	0.01134	0.00396	-0.01598								912	-0.0108226	0.00173579	0.0109066	0.00325777	-0.0154111								912	-0.387513	0.0644025	0.317209	0.0697493	-0.615722		912	-0.110375	0.380132	0.17
914.1	0.0286	-0.0185	0.0363	-0.0331	0.0579		914.1	-0.01487	-0.00296	0.00857	0.00402	-0.01288								914.1	-0.0137826	-0.00324421	0.00813658	0.00331777	-0.0123111								914.1	-0.493499	-0.120369	0.236646	0.0710339	-0.491867		914.1	-0.159611	0.329254	0.147247
916.2	0.0262	-0.0136	0.038	-0.0288	0.0674		916.2	-0.01722	0.00196	0.0103	0.00838	-0.00349								916.2	-0.0161326	0.00167579	0.00986658	0.00767777	-0.00292105								916.2	-0.577643	0.0621763	0.286961	0.164382	-0.116706		916.2	-0.0361658	0.336892	0.150663
918.3	0.0305	-0.0119	0.0376	-0.0319	0.0686		918.3	-0.01288	0.00367	0.00992	0.00534	-0.0024								918.3	-0.0117926	0.00338579	0.00948658	0.00463777	-0.00183105								918.3	-0.422245	0.125622	0.275909	0.0992953	-0.0731565		918.3	0.00108502	0.267116	0.119458
920.4	0.0306	-0.0116	0.0357	-0.0305	0.0701		920.4	-0.01274	0.00399	0.00805	0.00681	-0.001								920.4	-0.0116526	0.00370579	0.00761658	0.00610777	-0.000431053								920.4	-0.417232	0.137495	0.221522	0.130768	-0.017222		920.4	0.0110662	0.254384	0.113764
922.5	0.03	-0.0123	0.0347	-0.0304	0.0629		922.5	-0.0133	0.00331	0.00708	0.00697	-0.00831								922.5	-0.0122126	0.00302579	0.00664658	0.00626777	-0.00774105								922.5	-0.437284	0.112265	0.19331	0.134194	-0.30928		922.5	-0.0613589	0.289839	0.12962
924.6	0.0297	-0.0114	0.0348	-0.0299	0.0577		924.6	-0.01356	0.00423	0.0072	0.00753	-0.01362								924.6	-0.0124726	0.00394579	0.00676658	0.00682777	-0.0130511								924.6	-0.446593	0.1464	0.1968	0.146183	-0.521432		924.6	-0.0957283	0.356037	0.159225
926.7	0.03	-0.0126	0.0329	-0.0326	0.0581		926.7	-0.01322	0.00305	0.00533	0.00489	-0.01332								926.7	-0.0121326	0.00276579	0.00489658	0.00418777	-0.0127511								926.7	-0.434419	0.102618	0.142413	0.0896607	-0.509446		926.7	-0.121835	0.321282	0.143682
928.8	0.0326	-0.0129	0.0321	-0.0366	0.0642		928.8	-0.01058	0.00277	0.00456	0.000954912	-0.00733								928.8	-0.0094926	0.00248579	0.00412658	0.000252683	-0.00676105								928.8	-0.339892	0.0922296	0.120018	0.00540998	-0.270126		928.8	-0.078472	0.212512	0.0950382
930.9	0.0333	-0.0112	0.0336	-0.0371	0.0664		930.9	-0.00984	0.00449	0.00608	0.000516998	-0.00524								930.9	-0.0087526	0.00420579	0.00564658	-0.000185231	-0.00467105								930.9	-0.313395	0.156046	0.164226	-0.00396582	-0.186624		930.9	-0.0367424	0.210732	0.0942421
933	0.0335	-0.009	0.033	-0.0393	0.0686		933	-0.0096	0.00671	0.00551	-0.00162	-0.00315								933	-0.0085126	0.00642579	0.00507658	-0.00232223	-0.00258105								933	-0.304802	0.238415	0.147648	-0.0497192	-0.103121		933	-0.0143159	0.214259	0.0958193
935.1	0.0295	-0.012	0.0338	-0.0349	0.072		935.1	-0.01355	0.00373	0.00634	0.00284	0.000147069								935.1	-0.0124626	0.00344579	0.00590658	0.00213777	0.000716016								935.1	-0.446235	0.127848	0.171788	0.04577	0.0286072		935.1	-0.0144444	0.248421	0.111097
937.2	0.0319	-0.013	0.0336	-0.0383	0.0754		937.2	-0.01111	0.00275	0.00616	-0.000496745	0.00344								937.2	-0.0100226	0.00246579	0.00572658	-0.00119897	0.00400895								937.2	-0.358869	0.0914875	0.166553	-0.0256702	0.16017		937.2	0.00673441	0.218508	0.0977198
939.3	0.0348	-0.0085	0.035	-0.037	0.0772		939.3	-0.00817	0.00727	0.00759	0.00086534	0.00513								939.3	-0.0070826	0.00698579	0.00715658	0.000163111	0.00569895								939.3	-0.253599	0.259192	0.208143	0.00349223	0.227691		939.3	0.088984	0.216265	0.0967165
941.4	0.0333	-0.0084	0.0379	-0.0391	0.0711		941.4	-0.00963	0.00739	0.01052	-0.00117	-0.00107								941.4	-0.0085426	0.00710579	0.0100866	-0.00187223	-0.000501053								941.4	-0.305876	0.263644	0.29336	-0.0400847	-0.0200187		941.4	0.038205	0.2469	0.110417
943.5	0.0348	-0.0131	0.0381	-0.0363	0.0629		943.5	-0.00809	0.00271	0.01074	0.00169	-0.00938								943.5	-0.0070026	0.00242579	0.0103066	0.000987771	-0.00881105								943.5	-0.250735	0.0900034	0.299758	0.0211483	-0.35203		943.5	-0.0383709	0.26355	0.117863
945.6	0.036	-0.0129	0.0415	-0.0352	0.0636		945.6	-0.00685	0.00293	0.01417	0.00285	-0.00879								945.6	-0.0057626	0.00264579	0.0137366	0.00214777	-0.00822105								945.6	-0.206335	0.098166	0.399517	0.0459841	-0.328458		945.6	0.00177485	0.283641	0.126848
947.7	0.0328	-0.012	0.0416	-0.0327	0.0622		947.7	-0.01001	0.00385	0.0143	0.00541	-0.0103								947.7	-0.0089226	0.00356579	0.0138666	0.00470777	-0.00973105								947.7	-0.319482	0.132301	0.403298	0.100794	-0.388787		947.7	-0.0143753	0.332605	0.148745
949.8	0.0323	-0.0124	0.0395	-0.0327	0.0652		949.8	-0.01047	0.00347	0.01222	0.00548	-0.0074								949.8	-0.0093826	0.00318579	0.0117866	0.00477777	-0.00683105								949.8	-0.335953	0.118202	0.342803	0.102293	-0.272923		949.8	-0.00911567	0.286743	0.128235
951.9	0.0295	-0.0148	0.0406	-0.0343	0.0672		951.9	-0.01322	0.00108	0.01335	0.00394	-0.00551								951.9	-0.0121326	0.000795786	0.0129166	0.00323777	-0.00494105								951.9	-0.434419	0.0295259	0.375668	0.0693211	-0.197411		951.9	-0.031463	0.303951	0.135931
954	0.0308	-0.0137	0.0431	-0.0322	0.0664		954	-0.01188	0.0022	0.01588	0.0061	-0.00642								954	-0.0107926	0.00191579	0.0154466	0.00539777	-0.00585105								954	-0.386439	0.071081	0.449251	0.115567	-0.233769		954	0.00313827	0.325641	0.145631
956.1	0.0317	-0.0143	0.0415	-0.0319	0.0683		956.1	-0.01094	0.00162	0.0143	0.00646	-0.00462								956.1	-0.0098526	0.00133579	0.0138666	0.00575777	-0.00405105								956.1	-0.352782	0.0495614	0.403298	0.123275	-0.161853		956.1	0.0123	0.287314	0.128491
958.2	0.0298	-0.0112	0.0381	-0.0329	0.0712		958.2	-0.0128	0.00474	0.01093	0.00552	-0.00183								958.2	-0.0117126	0.00445579	0.0104966	0.00481777	-0.00126105								958.2	-0.419381	0.165322	0.305284	0.103149	-0.0503832		958.2	0.0207984	0.27723	0.123981
960.3	0.0326	-0.0137	0.0406	-0.0315	0.0719		960.3	-0.00996	0.00226	0.01346	0.00699	-0.00124								960.3	-0.0088726	0.00197579	0.0130266	0.00628777	-0.000671053								960.3	-0.317692	0.0733072	0.378867	0.134622	-0.0268108		960.3	0.0484588	0.253448	0.113345
962.4	0.0304	-0.0123	0.0378	-0.0326	0.0717		962.4	-0.01212	0.00368	0.01068	0.00595	-0.00154								962.4	-0.0110326	0.00339579	0.0102466	0.00524777	-0.000971053								962.4	-0.395033	0.125993	0.298013	0.112355	-0.0387967		962.4	0.0205065	0.261134	0.116783
964.5	0.0309	-0.0134	0.0352	-0.0322	0.0697		964.5	-0.01158	0.0026	0.00811	0.00641	-0.00365								964.5	-0.0104926	0.00231579	0.00767658	0.00570777	-0.00308105								964.5	-0.375697	0.0859221	0.223267	0.122204	-0.123098		964.5	-0.0134805	0.238515	0.106667
966.6	0.0301	-0.0162	0.0347	-0.0334	0.0672		966.6	-0.01234	-0.000179553	0.00764	0.00527	-0.00626								966.6	-0.0112526	-0.000463767	0.00720658	0.00456777	-0.00569105								966.6	-0.40291	-0.0172071	0.209598	0.0977966	-0.227376		966.6	-0.0680198	0.247333	0.110611
968.7	0.03	-0.012	0.0348	-0.037	0.0698		968.7	-0.0124	0.00404	0.00776	0.00173	-0.00377								968.7	-0.0113126	0.00375579	0.00732658	0.00102777	-0.00320105								968.7	-0.405058	0.13935	0.213088	0.0220047	-0.127893		968.7	-0.0317017	0.245312	0.109707
970.8	0.0297	-0.0129	0.0335	-0.039	0.0684		970.8	-0.01265	0.00316	0.00649	-0.000203376	-0.00527								970.8	-0.0115626	0.00287579	0.00605658	-0.000905605	-0.00470105								970.8	-0.41401	0.1067	0.176151	-0.0193891	-0.187822		970.8	-0.0676742	0.237998	0.106436
972.9	0.0283	-0.0124	0.0334	-0.043	0.0686		972.9	-0.01401	0.00368	0.00641	-0.00414	-0.00518								972.9	-0.0129226	0.00339579	0.00597658	-0.00484223	-0.00461105								972.9	-0.462706	0.125993	0.173824	-0.103673	-0.184227		972.9	-0.0901576	0.257017	0.114942
975	0.0294	-0.0092	0.0342	-0.0429	0.0726		975	-0.01287	0.0069	0.00724	-0.00398	-0.00129								975	-0.0117826	0.00661579	0.00680658	-0.00468223	-0.000721053								975	-0.421887	0.245464	0.197964	-0.100247	-0.0288084		975	-0.021503	0.267394	0.119582
977.1	0.03	-0.0101	0.0383	-0.0415	0.0717		977.1	-0.01223	0.00602	0.01137	-0.00252	-0.00229								977.1	-0.0111426	0.00573579	0.0109366	-0.00322223	-0.00172105								977.1	-0.398971	0.212814	0.318082	-0.0689883	-0.0687617		977.1	-0.00116523	0.28068	0.125524
979.2	0.0329	-0.0087	0.0342	-0.039	0.0758		979.2	-0.00929	0.00744	0.00729	4.49666e-05	0.0017								979.2	-0.0082026	0.00715579	0.00685658	-0.000657262	0.00226895								979.2	-0.293702	0.2655	0.199418	-0.0140721	0.0906518		979.2	0.0495591	0.219462	0.0981462
981.3	0.033	-0.0115	0.0354	-0.0409	0.0764		981.3	-0.00915	0.00466	0.00852	-0.00179	0.00219								981.3	-0.0080626	0.00437579	0.00808658	-0.00249223	0.00275895								981.3	-0.288689	0.162354	0.235192	-0.0533589	0.110229		981.3	0.0331453	0.208878	0.093413
983.4	0.0341	-0.0127	0.0412	-0.0347	0.0717		983.4	-0.00801	0.00348	0.01435	0.00447	-0.00261								983.4	-0.0069226	0.00319579	0.0139166	0.00376777	-0.00204105								983.4	-0.24787	0.118573	0.404752	0.0806685	-0.0815467		983.4	0.0549153	0.24362	0.10895
985.5	0.0357	-0.0142	0.0377	-0.0345	0.0709		985.5	-0.00637	0.00199	0.01087	0.00473	-0.00352								985.5	-0.0052826	0.00170579	0.0104366	0.00402777	-0.00295105								985.5	-0.189148	0.0632894	0.303539	0.0862351	-0.117904		985.5	0.0292023	0.192998	0.0863113
987.6	0.0336	-0.0163	0.039	-0.031	0.0688		987.6	-0.00843	-8.57468e-05	0.0122	0.00829	-0.00573								987.6	-0.0073426	-0.000369961	0.0117666	0.00758777	-0.00516105								987.6	-0.262909	-0.0137266	0.342221	0.162455	-0.206201		987.6	0.00436808	0.252606	0.112969
989.7	0.0358	-0.0153	0.0408	-0.0365	0.0683		989.7	-0.00618	0.000933634	0.01403	0.00286	-0.00634								989.7	-0.0050926	0.00064942	0.0135966	0.00215777	-0.00577105								989.7	-0.182345	0.0240953	0.395445	0.0461982	-0.230572		989.7	0.0105643	0.247461	0.110668
991.8	0.0334	-0.011	0.0378	-0.0374	0.068		991.8	-0.00854	0.00525	0.01105	0.00202	-0.00674								991.8	-0.0074526	0.00496579	0.0106166	0.00131777	-0.00617105								991.8	-0.266847	0.184245	0.308775	0.0282137	-0.246554		991.8	0.00156635	0.255963	0.11447
993.9	0.0281	-0.0156	0.036	-0.0356	0.0661		993.9	-0.0138	0.000672395	0.00928	0.00388	-0.00875								993.9	-0.0127126	0.000388181	0.00884658	0.00317777	-0.00818105								993.9	-0.455187	0.0144026	0.257296	0.0680365	-0.32686		993.9	-0.0884623	0.294084	0.131518
996	0.0327	-0.0137	0.0383	-0.0329	0.0652		996	-0.00916	0.00259	0.01161	0.00664	-0.00976								996	-0.0080726	0.00230579	0.0111766	0.00593777	-0.00919105								996	-0.289047	0.0855511	0.325062	0.127128	-0.367213		996	-0.0237037	0.293568	0.131288
998.1	0.0334	-0.0138	0.0336	-0.038	0.0748		998.1	-0.00842	0.00251	0.00693	0.0016	-0.000263895								998.1	-0.0073326	0.00222579	0.00649658	0.000897771	0.000305052								998.1	-0.262551	0.0825829	0.188948	0.0192214	0.0121878		998.1	0.00807783	0.167067	0.0747147
1000.2	0.0344	-0.0155	0.039	-0.036	0.0736		1000.2	-0.00738	0.000830537	0.01236	0.00367	-0.00157								1000.2	-0.0062926	0.000546323	0.0119266	0.00296777	-0.00100105								1000.2	-0.225312	0.0202701	0.346875	0.0635404	-0.0399953		1000.2	0.0330755	0.207163	0.092646
1002.3	0.0291	-0.0164	0.0419	-0.0366	0.0751		1002.3	-0.01264	-5.00825e-05	0.01529	0.00313	-0.000177959								1002.3	-0.0115526	-0.000334297	0.0148566	0.00242777	0.000390988								1002.3	-0.413652	-0.0124033	0.432092	0.0519789	0.0156212		1002.3	0.0147273	0.299928	0.134132
1004.4	0.025	-0.0202	0.0398	-0.0352	0.0744		1004.4	-0.0167	-0.00383	0.01321	0.00459	-0.000984991								1004.4	-0.0156126	-0.00411421	0.0127766	0.00388777	-0.000416044								1004.4	-0.559024	-0.152649	0.371596	0.0832377	-0.0166223		1004.4	-0.0546922	0.341373	0.152667
1006.5	0.0265	-0.0187	0.0399	-0.0341	0.0723		1006.5	-0.01515	-0.00231	0.01334	0.00575	-0.00319								1006.5	-0.0140626	-0.00259421	0.0129066	0.00504777	-0.00262105								1006.5	-0.503525	-0.0962526	0.375377	0.108073	-0.10472		1006.5	-0.0442092	0.322716	0.144323
1008.6	0.0307	-0.0176	0.0391	-0.0383	0.0755		1008.6	-0.01091	-0.00119	0.01257	0.00161	-9.90557e-05								1008.6	-0.0098226	-0.00147421	0.0121366	0.000907771	0.000469891								1008.6	-0.351707	-0.0546975	0.352983	0.0194355	0.0187737		1008.6	-0.00304264	0.250983	0.112243
1010.7	0.03	-0.0147	0.0386	-0.041	0.0791		1010.7	-0.01157	0.00173	0.01209	-0.00102	0.00339								1010.7	-0.0104826	0.00144579	0.0116566	-0.00172223	0.00395895								1010.7	-0.375339	0.0536427	0.339022	-0.0368731	0.158173		1010.7	0.027725	0.265155	0.118581
1012.8	0.0297	-0.0151	0.0378	-0.0414	0.0774		1012.8	-0.01183	0.00135	0.01132	-0.00136	0.00159								1012.8	-0.0107426	0.00106579	0.0108866	-0.00206223	0.00215895								1012.8	-0.384649	0.0395436	0.316627	-0.0441526	0.0862569		1012.8	0.00272527	0.254521	0.113825
1014.9	0.0297	-0.0115	0.038	-0.0419	0.0777		1014.9	-0.01179	0.00497	0.01155	-0.0018	0.00178								1014.9	-0.0107026	0.00468579	0.0111166	-0.00250223	0.00234895								1014.9	-0.383217	0.173856	0.323317	-0.053573	0.0938481		1014.9	0.0308461	0.268577	0.120111
1017	0.0326	-0.0122	0.0379	-0.041	0.0785		1017	-0.00885	0.00429	0.01147	-0.000837493	0.00247								1017	-0.0077626	0.00400579	0.0110366	-0.00153972	0.00303895								1017	-0.277947	0.148626	0.32099	-0.0329656	0.121416		1017	0.0560238	0.225008	0.100627
1019.1	0.03	-0.0063	0.0367	-0.0401	0.0813		1019.1	-0.01141	0.0102	0.0103	0.000124593	0.00517								1019.1	-0.0103226	0.00991579	0.00986658	-0.000577636	0.00573895								1019.1	-0.36961	0.367903	0.286961	-0.0123673	0.22929		1019.1	0.100435	0.298581	0.133529
1021.2	0.0309	-0.0121	0.0372	-0.0437	0.0762		1021.2	-0.01047	0.00442	0.01083	-0.00341	-4.12485e-05								1021.2	-0.0093826	0.00413579	0.0103966	-0.00411223	0.000527698								1021.2	-0.335953	0.153449	0.302376	-0.0880434	0.0210833		1021.2	0.0105825	0.242631	0.108508
1023.3	0.0293	-0.0137	0.0409	-0.0387	0.0738		1023.3	-0.01203	0.00284	0.01455	0.00165	-0.00255								1023.3	-0.0109426	0.00255579	0.0141166	0.000947771	-0.00198105								1023.3	-0.39181	0.0948268	0.410569	0.0202919	-0.0791495		1023.3	0.0109457	0.290324	0.129837
1025.4	0.0291	-0.0157	0.0398	-0.0391	0.0701		1025.4	-0.01218	0.000863104	0.01348	0.00131	-0.00636								1025.4	-0.0110926	0.00057889	0.0130466	0.000607771	-0.00579105								1025.4	-0.397181	0.0214784	0.379449	0.0130125	-0.231371		1025.4	-0.0429225	0.2944	0.13166
1027.5	0.0315	-0.0145	0.0381	-0.0377	0.0693		1027.5	-0.00974	0.00208	0.01181	0.00277	-0.00726								1027.5	-0.0086526	0.00179579	0.0113766	0.00206777	-0.00669105								1027.5	-0.309814	0.0666287	0.330879	0.0442712	-0.267329		1027.5	-0.0270731	0.264417	0.118251
1029.6	0.033	-0.0145	0.041	-0.0404	0.0726		1029.6	-0.0082	0.0021	0.01473	0.000135021	-0.00407								1029.6	-0.0071126	0.00181579	0.0142966	-0.000567208	-0.00350105								1029.6	-0.254673	0.0673707	0.415804	-0.012144	-0.139878		1029.6	0.0152959	0.25536	0.1142
1031.7	0.0335	-0.0123	0.0384	-0.0408	0.0731		1031.7	-0.00766	0.00432	0.01216	-0.000202894	-0.00368								1031.7	-0.0065726	0.00403579	0.0117266	-0.000905123	-0.00311105								1031.7	-0.235338	0.149739	0.341058	-0.0193788	-0.124297		1031.7	0.0223567	0.227735	0.101846
1033.8	0.0316	-0.0136	0.0366	-0.0383	0.0701		1033.8	-0.00952	0.00304	0.01039	0.00236	-0.00678								1033.8	-0.0084326	0.00275579	0.00995658	0.00165777	-0.00621105								1033.8	-0.301937	0.102247	0.289579	0.0354931	-0.248152		1033.8	-0.0245539	0.247639	0.110748
1035.9	0.0301	-0.0165	0.0404	-0.0356	0.0763		1035.9	-0.01098	0.000160007	0.01421	0.00512	-0.000690473								1035.9	-0.0098926	-0.000124207	0.0137766	0.00441777	-0.000121526								1035.9	-0.354214	-0.00460844	0.400681	0.0945851	-0.00485538		1035.9	0.0263176	0.269972	0.120735
1038	0.0301	-0.0115	0.0388	-0.0331	0.0774		1038	-0.01094	0.00518	0.01264	0.00768	0.000302494								1038	-0.0098526	0.00489579	0.0122066	0.00697777	0.000871441								1038	-0.352782	0.181647	0.355018	0.149395	0.0348169		1038	0.0736192	0.264538	0.118305
1040.1	0.0319	-0.0147	0.0351	-0.0362	0.0755		1040.1	-0.0091	0.002	0.00896	0.00465	-0.0017								1040.1	-0.0080126	0.00171579	0.00852658	0.00394777	-0.00113105								1040.1	-0.286899	0.0636604	0.247989	0.0845223	-0.0451893		1040.1	0.0128167	0.197628	0.0883817
1042.2	0.0279	-0.0155	0.0354	-0.0381	0.0699		1042.2	-0.01306	0.00122	0.00929	0.00281	-0.00741								1042.2	-0.0119726	0.000935786	0.00885658	0.00210777	-0.00684105								1042.2	-0.42869	0.0347203	0.257586	0.0451277	-0.273322		1042.2	-0.0729157	0.27454	0.122778
1044.3	0.0265	-0.0193	0.0343	-0.0373	0.0686		1044.3	-0.01441	-0.00256	0.00822	0.00367	-0.00882								1044.3	-0.0133226	-0.00284421	0.00778658	0.00296777	-0.00825105								1044.3	-0.477028	-0.105528	0.226466	0.0635404	-0.329656		1044.3	-0.124441	0.285159	0.127527
1046.4	0.0245	-0.02	0.0351	-0.0355	0.0709		1046.4	-0.01637	-0.00324	0.00904	0.00553	-0.00663								1046.4	-0.0152826	-0.00352421	0.00860658	0.00482777	-0.00606105								1046.4	-0.547208	-0.130758	0.250315	0.103363	-0.242159		1046.4	-0.113289	0.309978	0.138626
1048.5	0.0292	-0.0221	0.0338	-0.0392	0.0727		1048.5	-0.01163	-0.00532	0.00777	0.00189	-0.00493								1048.5	-0.0105426	-0.00560421	0.00733658	0.00118777	-0.00436105								1048.5	-0.377488	-0.207932	0.213378	0.0254303	-0.174238		1048.5	-0.10417	0.228042	0.101983
1050.6	0.0297	-0.0202	0.0347	-0.0414	0.0786		1050.6	-0.01109	-0.0034	0.0087	-0.000244123	0.000860302								1050.6	-0.0100026	-0.00368421	0.00826658	-0.000946352	0.00142925								1050.6	-0.358153	-0.136695	0.240427	-0.0202615	0.0571031		1050.6	-0.0435158	0.223029	0.0997414
1052.7	0.0316	-0.0188	0.0369	-0.039	0.0784		1052.7	-0.00915	-0.00198	0.01092	0.00222	0.00055327								1052.7	-0.0080626	-0.00226421	0.0104866	0.00151777	0.00112222								1052.7	-0.288689	-0.0840087	0.304994	0.0324957	0.0448362		1052.7	0.00192558	0.215909	0.0965577
1054.8	0.0288	-0.0195	0.0379	-0.0399	0.0787		1054.8	-0.01191	-0.00267	0.01195	0.00138	0.000746237								1054.8	-0.0108226	-0.00295421	0.0115166	0.000677771	0.00131518								1054.8	-0.387513	-0.10961	0.33495	0.0145112	0.0525459		1054.8	-0.0190231	0.262457	0.117374
1056.9	0.0316	-0.0166	0.0334	-0.0394	0.0812		1056.9	-0.00907	0.000253813	0.00748	0.00194	0.00314								1056.9	-0.0079826	-3.04013e-05	0.00704658	0.00123777	0.00370895								1056.9	-0.285825	-0.00112797	0.204944	0.0265008	0.148184		1056.9	0.0185354	0.190159	0.0850418
1059	0.0305	-0.0145	0.0322	-0.0404	0.0786		1059	-0.01013	0.00237	0.0063	0.001	0.000432173								1059	-0.0090426	0.00208579	0.00586658	0.000297771	0.00100112								1059	-0.323779	0.0773885	0.170625	0.00637532	0.039998		1059	-0.00587847	0.188017	0.0840839
1061.1	0.0329	-0.017	0.0321	-0.043	0.0777		1061.1	-0.00768	-0.000107425	0.00623	-0.00153	-0.000574859								1061.1	-0.0065926	-0.000391639	0.00579658	-0.00223223	-5.91241e-06								1061.1	-0.236054	-0.0145309	0.168589	-0.0477923	-0.00023622		1061.1	-0.026005	0.144272	0.0645205
1063.2	0.0319	-0.0191	0.0369	-0.0434	0.0785		1063.2	-0.00864	-0.00219	0.01106	-0.00187	0.000118109								1063.2	-0.0075526	-0.00247421	0.0106266	-0.00257223	0.000687056								1063.2	-0.270428	-0.0918003	0.309065	-0.0550718	0.0274501		1063.2	-0.0161569	0.211873	0.0947526
1065.3	0.0297	-0.0207	0.0349	-0.0388	0.0759		1065.3	-0.0108	-0.00377	0.00908	0.00279	-0.00259								1065.3	-0.0097126	-0.00405421	0.00864658	0.00208777	-0.00202105								1065.3	-0.347769	-0.150423	0.251479	0.0446995	-0.0807477		1065.3	-0.0565522	0.223237	0.0998347
1067.4	0.0327	-0.0237	0.0336	-0.0365	0.0764		1067.4	-0.00776	-0.00675	0.00781	0.00515	-0.0022								1067.4	-0.0066726	-0.00703421	0.00737658	0.00444777	-0.00163105								1067.4	-0.238919	-0.260989	0.214542	0.0952274	-0.0651659		1067.4	-0.0510609	0.207065	0.0926025
1069.5	0.0321	-0.0184	0.0354	-0.0397	0.078		1069.5	-0.00832	-0.00143	0.00964	0.00201	-0.000702988								1069.5	-0.0072326	-0.00171421	0.00920658	0.00130777	-0.000134041								1069.5	-0.25897	-0.0636021	0.267766	0.0279995	-0.00535539		1069.5	-0.00643243	0.189351	0.0846803
1071.6	0.03	-0.0147	0.0365	-0.041	0.0766		1071.6	-0.01038	0.00229	0.01076	0.000776733	-0.00221								1071.6	-0.0092926	0.00200579	0.0103266	7.45041e-05	-0.00164105								1071.6	-0.33273	0.0744203	0.30034	0.00159514	-0.0655654		1071.6	-0.00438803	0.229487	0.10263
1073.7	0.0284	-0.017	0.0386	-0.0377	0.0701		1073.7	-0.01194	8.85827e-06	0.01289	0.00414	-0.00882								1073.7	-0.0108526	-0.000275356	0.0124566	0.00343777	-0.00825105								1073.7	-0.388588	-0.0102165	0.36229	0.0736031	-0.329656		1073.7	-0.0585136	0.307949	0.137719
1075.8	0.0304	-0.019	0.0366	-0.0363	0.0681		1075.8	-0.0099	-0.00197	0.01092	0.0056	-0.01092								1075.8	-0.0088126	-0.00225421	0.0104866	0.00489777	-0.0103511								1075.8	-0.315543	-0.0836376	0.304994	0.104862	-0.413558		1075.8	-0.0805768	0.295444	0.132126
1077.9	0.0297	-0.0158	0.0376	-0.0367	0.0669		1077.9	-0.01056	0.00125	0.01194	0.00526	-0.01223								1077.9	-0.0094726	0.000965786	0.0115066	0.00455777	-0.0116611								1077.9	-0.339175	0.0358333	0.33466	0.0975825	-0.465897		1077.9	-0.0673994	0.328706	0.147002
1080	0.0297	-0.0204	0.0397	-0.041	0.0699		1080	-0.01051	-0.00333	0.01407	0.00103	-0.00934								1080	-0.0094226	-0.00361421	0.0136366	0.000327771	-0.00877105								1080	-0.337385	-0.134097	0.396609	0.00701762	-0.350432		1080	-0.0836576	0.306989	0.13729
1082.1	0.0308	-0.0238	0.0383	-0.0391	0.0779		1082.1	-0.00937	-0.00671	0.0127	0.00299	-0.00145								1082.1	-0.0082826	-0.00699421	0.0122666	0.00228777	-0.000881053								1082.1	-0.296566	-0.259505	0.356764	0.0489815	-0.035201		1082.1	-0.0371054	0.264258	0.11818
1084.2	0.0284	-0.0248	0.0384	-0.038	0.079		1084.2	-0.01173	-0.00769	0.01282	0.00415	-0.000452212								1084.2	-0.0106426	-0.00797421	0.0123866	0.00344777	0.000116735								1084.2	-0.381068	-0.295866	0.360254	0.0738172	0.00466393		1084.2	-0.0476398	0.298603	0.133539
1086.3	0.027	-0.0215	0.0369	-0.0338	0.084		1086.3	-0.01309	-0.00437	0.01135	0.00841	0.00444								1086.3	-0.0120026	-0.00465421	0.0109166	0.00770777	0.00500895								1086.3	-0.429764	-0.172684	0.3175	0.165024	0.200124		1086.3	0.0160398	0.308755	0.13808
1088.4	0.0281	-0.02	0.0349	-0.0409	0.0886		1088.4	-0.01195	-0.00286	0.00938	0.00137	0.00893								1088.4	-0.0108626	-0.00314421	0.00894658	0.000667771	0.00949895								1088.4	-0.388946	-0.116659	0.260204	0.0142971	0.379514		1088.4	0.029682	0.305133	0.13646
1090.5	0.03	-0.0192	0.0335	-0.0394	0.085		1090.5	-0.01001	-0.00204	0.008	0.00294	0.00523								1090.5	-0.0089226	-0.00232421	0.00756658	0.00223777	0.00579895								1090.5	-0.319482	-0.0862348	0.220068	0.047911	0.231687		1090.5	0.0187897	0.230296	0.102991
1092.6	0.0256	-0.0155	0.0337	-0.0424	0.0833		1092.6	-0.01437	0.00168	0.00823	-2.41129e-06	0.00342								1092.6	-0.0132826	0.00139579	0.00779658	-0.00070464	0.00398895								1092.6	-0.475596	0.0517875	0.226757	-0.0150864	0.159371		1092.6	-0.0105533	0.276298	0.123564
1094.7	0.0279	-0.017	0.033	-0.0408	0.0776		1094.7	-0.01203	0.000202664	0.00756	0.00166	-0.00239								1094.7	-0.0109426	-8.15503e-05	0.00712658	0.000957771	-0.00182105								1094.7	-0.39181	-0.00302574	0.207271	0.020506	-0.072757		1094.7	-0.0479632	0.218344	0.0976466
1096.8	0.0298	-0.0183	0.0358	-0.044	0.0756		1096.8	-0.01009	-0.00108	0.01038	-0.00148	-0.00449								1096.8	-0.0090026	-0.00136421	0.00994658	-0.00218223	-0.00392105								1096.8	-0.322347	-0.0506162	0.289288	-0.0467218	-0.156659		1096.8	-0.057411	0.223831	0.1001
1098.9	0.0319	-0.016	0.0322	-0.0476	0.0813		1098.9	-0.00794	0.00124	0.00681	-0.00502	0.0011								1098.9	-0.0068526	0.000955786	0.00637658	-0.00572223	0.00166895								1098.9	-0.245364	0.0354623	0.185458	-0.122514	0.0666798		1098.9	-0.0160555	0.168836	0.0755058
1101	0.0335	-0.0185	0.0337	-0.0508	0.083		1101	-0.0063	-0.00124	0.00834	-0.00815	0.00269								1101	-0.0052126	-0.00152421	0.00790658	-0.00885223	0.00325895								1101	-0.186642	-0.0565526	0.229956	-0.189527	0.130206		1101	-0.014512	0.188901	0.0844791
1103.1	0.0306	-0.0145	0.0344	-0.0487	0.0794		1103.1	-0.00916	0.00278	0.00906	-0.00599	-0.00102								1103.1	-0.0080726	0.00249579	0.00862658	-0.00669223	-0.000451053								1103.1	-0.289047	0.0926006	0.250897	-0.143281	-0.0180211		1103.1	-0.0213704	0.208353	0.0931781
[truncated: 140 more rows]
