# Supplementary material for: Photosynthetic sea slugs induce protective changes to the light reactions of the chloroplasts they steal from algae
Source: eLife. 2020 Oct 20;9:e57389. doi: 10.7554/eLife.57389 (PMC7679141; doi:10.7554/eLife.57389)
Supplement: Figure 8—source data 1. [file elife-57389-fig8-data1.xlsx]

## Sheet: Fig7A amb timida
													Original data (Fv/Fm)																																		Averaged data (shown in Fig. 7A)
	Day	Slug 1	Slug 2	Slug 3	Slug 4	Slug 5	Slug 6	Slug 7	Slug 8	Slug 9	Slug 10	Slug 11	Slug 12	Slug 13	Slug 14	Slug 15	Slug 16	Slug 17	Slug 18	Slug 19	Slug 20	Slug 21	Slug 22	Slug 23	Slug 24	Slug 25	Slug 26	Slug 27	Slug 28	Slug 29	Slug 30	Slug 31	Slug 32	Slug 33	Slug 34	Slug 35	Slug 36	Slug 37	Slug 38	Slug 39	Slug 40	Slug 41	Slug 42	Slug 43	Slug 44	Slug 45	Average	stdev	SE
	0	0.758	0.767	0.772	0.751	0.72	0.75	0.754	0.767	0.755	0.729	0.711	0.755	0.779	0.741	0.756	0.77	0.754	0.784	0.774	0.751	0.774	0.778	0.75	0.765	0.761	0.767	0.767	0.765	0.776	0.775	0.759	0.789	0.771	0.742	0.783	0.767	0.735	0.767	0.799	0.77	0.774	0.75	0.77	0.775	0.772	0.7622	0.0172937	0.002578
	2	0.76	0.754	0.752	0.759	0.752	0.748	0.756	0.735	0.761	0.749	0.774	0.761	0.74	0.765	0.755	0.763	0.762	0.762	0.756	0.751	0.767	0.771	0.777	0.783	0.775	0.757	0.769	0.767	0.771	0.782	0.755	0.727	0.771	0.74	0.769											0.759886	0.0127251	0.00215093
	4	0.767	0.767	0.738	0.758	0.767	0.776	0.745	0.753	0.759	0.751	0.753	0.755	0.747	0.721	0.752	0.757	0.753	0.757	0.763	0.749	0.765	0.75	0.743	0.748	0.762	0.76	0.763	0.765	0.77	0.748	0.767	0.748	0.775	0.762	0.743											0.755914	0.0111655	0.00188732
	6	0.732	0.718	0.731	0.731	0.695	0.73	0.722	0.744	0.743	0.731	0.749	0.726	0.706	0.719	0.746	0.752	0.741	0.726	0.742	0.716	0.759	0.746	0.738	0.732	0.761	0.736	0.752	0.747	0.755	0.757	0.737	0.746	0.752	0.748	0.743											0.7374	0.0150981	0.00255205
	8	0.716	0.693	0.707	0.719	0.734	0.699	0.72	0.755	0.728	0.738	0.715	0.753	0.739	0.722	0.712	0.739	0.767	0.753	0.74	0.756	0.758	0.735	0.775	0.759	0.687																					0.73276	0.0235377	0.00470754
	10	0.695	0.696	0.709	0.728	0.686	0.623	0.657	0.61	0.671	0.687	0.639	0.669	0.684	0.682	0.695	0.67	0.718	0.725	0.745	0.733	0.68	0.708	0.737	0.72	0.704																					0.69084	0.0343944	0.00687888
	12	0.73	0.725	0.706	0.701	0.709	0.706	0.726	0.736	0.635	0.73	0.736	0.683	0.741	0.715	0.726	0.684	0.676	0.704	0.684	0.719																										0.7086	0.0260857	0.00583294
	14	0.544	0.668	0.642	0.661	0.65	0.689	0.609	0.675	0.56	0.673	0.657	0.673	0.568	0.594	0.653	0.703	0.662	0.721	0.656	0.691																										0.64745	0.0482477	0.0107885
	16	0.714	0.661	0.682	0.568	0.545	0.575	0.678	0.669	0.724	0.574	0.692	0.697	0.715	0.685	0.545	0.71	0.667	0.676	0.688	0.652																										0.65585	0.059289	0.0132574
	18	0.639	0.637	0.668	0.661	0.63	0.454	0.591	0.639	0.69	0.598	0.614	0.662	0.654	0.609	0.651	0.676	0.525	0.484	0.572	0.68																										0.6167	0.064587	0.0144421
	20	0.463	0.599	0.607	0.307	0.532	0.489	0.389	0.554	0.558	0.577	0.518	0.291	0.492	0.586	0.611	0.55	0.54	0.526	0.662	0.288																										0.50695	0.108659	0.0242968
	22	0.464	0.56	0.525	0.593	0.541	0.484	0.504	0.454	0.55	0.586	0.238	0.306	0.33	0.517	0.521	0.294	0.475	0.562	0.55	0.48																										0.4767	0.103362	0.0231126
	24	0.426	0.121	0.33	0.551	0.226	0.513	0.398	0.448	0.373	0.455	0.426	0.579	0.301	0.398	0.467	0.2	0.51	0.406	0.426	0.62																										0.4087	0.126081	0.0281927
	26	0.04	0.303	0.386	0.049	0.331	0.554	0.457	0.453	0.253	0.337	0.455	0.207	0.384	0.389	0.421	0.447	0.553	0.353	0.318	0.16																										0.3425	0.143203	0.0320213
	28	0.05	0.024	0.537	0.244	0.309	0.243	0.324	0.294	0.419	0.331	0.272	0.044	0.297	0.221	0.357	0.314	0.497	0.47	0.287	0.338																										0.2936	0.137948	0.0308461
	31	0.08	0.101	0.171	0.016	0.116	0.14	0.281	0.238	0.141	0.222	0.088	0	0.1	0.203	0.048	0.295	0.137	0	0.267	0.289																										0.14665	0.0961524	0.0215003
	33	0.028	0.102	0.25	0	0.24	0.323	0.179	0.163	0.268	0.13	0.147	0	0.203	0	0.137	0.011	0.193	0.176	0	0.136																										0.1343	0.100171	0.0223989
	35	0.07	0	0	0.016	0.045	0.134	0	0	0.226	0.058	0.146	0.092	0.235	0.005	0.073	0.097	0	0.228	0.021	0																										0.0723	0.0818292	0.0182976
	37	0.072	0	0.211	0.077	0	0.123	0	0	0.192	0.122	0.035	0	0	0.185	0.062	0	0.087	0.276	0	0.101																										0.07715	0.0848244	0.0189673
	41	0	0.076	0.104	0	0	0.023	0.092	0.111	0	0	0	0.021	0.069	0.08	0.137	0.2	0	0	0	0.105																										0.0509	0.0595977	0.0133264
	45	0	0	0.141	0	0	0	0.06	0.094	0	0	0	0.043	0.129	0.013	0	0	0	0	0	0.07																										0.0275	0.0463119	0.0103556
[truncated: 1 more columns]

## Sheet: Fig7A CO2 timida
													Original data (Fv/Fm)																																		Averaged data (shown in Fig. 7A)
	Day	Slug 1	Slug 2	Slug 3	Slug 4	Slug 5	Slug 6	Slug 7	Slug 8	Slug 9	Slug 10	Slug 11	Slug 12	Slug 13	Slug 14	Slug 15	Slug 16	Slug 17	Slug 18	Slug 19	Slug 20	Slug 21	Slug 22	Slug 23	Slug 24	Slug 25	Slug 26	Slug 27	Slug 28	Slug 29	Slug 30	Slug 31	Slug 32	Slug 33	Slug 34	Slug 35	Slug 36	Slug 37	Slug 38	Slug 39	Slug 40	Slug 41	Slug 42	Slug 43	Slug 44	Slug 45	Average	stdev	SE
	0	0.735	0.758	0.756	0.688	0.791	0.708	0.768	0.711	0.726	0.676	0.743	0.72	0.699	0.669	0.771	0.728	0.724	0.697	0.664	0.665	0.771	0.717	0.766	0.697	0.74	0.744	0.349	0.73	0.745	0.678	0.669	0.764	0.782	0.791	0.737	0.689	0.673	0.771	0.709	0.771	0.776	0.717	0.8	0.772	0.759	0.722533	0.0688409	0.0102622
	2	0.784	0.734	0.705	0.767	0.727	0.728	0.755	0.638	0.789	0.783	0.75	0.775	0.767	0.787	0.781	0.734	0.769	0.704	0.723	0.715	0.747	0.739	0.723	0.708	0.735	0.768	0.724	0.752	0.763	0.744	0.741	0.713	0.755	0.7	0.26											0.7282	0.0873377	0.0147628
	4	0.748	0.768	0.746	0.782	0.714	0.781	0.771	0.74	0.707	0.77	0.757	0.756	0.786	0.753	0.763	0.782	0.766	0.745	0.759	0.776	0.691	0.741	0.702	0.669	0.75	0.772	0.738	0.069	0.724	0.707	0.77	0.73	0.719	0.743	0.66											0.724429	0.118371	0.0200084
	6	0.724	0.72	0.738	0.735	0.686	0.726	0.746	0.757	0.723	0.735	0.744	0.726	0.744	0.762	0.748	0.754	0.702	0.742	0.745	0.712	0.762	0.753	0.742	0.767	0.751	0.058	0.704	0.649	0.712	0.742	0.759	0.77	0.666	0.727	0.724											0.713	0.117111	0.0197953
	8	0.714	0.731	0.712	0.713	0.734	0.699	0.753	0.724	0.723	0.718	0.747	0.741	0.678	0.717	0.741	0.764	0.748	0.768	0.67	0.731	0.75	0.746	0.717	0	0.568																					0.69228	0.149573	0.0299147
	10	0.436	0.54	0.717	0.622	0.713	0.566	0.664	0.654	0.588	0.669	0.652	0.62	0.652	0.663	0.639	0.541	0.676	0.693	0.658	0.64	0.625	0.672	0.671	0.685	0																					0.61024	0.141441	0.0282882
	12	0.703	0.636	0.71	0.676	0.673	0.65	0.714	0.699	0.702	0.686	0.712	0.668	0.68	0.73	0.622	0.686	0	0.732	0.582	0.417																										0.6339	0.164606	0.036807
	14	0.548	0.622	0.612	0.649	0.634	0.649	0.652	0.668	0.675	0.682	0.543	0.625	0.493	0.626	0.597	0.674	0.565	0.64	0	0.346																										0.575	0.15649	0.0349922
	16	0.687	0.628	0.633	0.519	0.539	0.604	0.403	0.458	0.564	0.571	0.52	0.599	0	0.494	0.679	0.466	0.56	0.639	0.576	0.26																										0.51995	0.157918	0.0353114
	18	0	0.494	0.499	0.476	0.426	0.554	0.594	0.538	0.118	0.613	0.636	0.378	0.269	0.49	0.495	0.469	0.458	0.55	0.558	0.394																										0.45045	0.159863	0.0357464
	20	0.396	0	0.439	0.241	0.289	0.501	0.542	0.086	0.354	0.329	0.218	0.39	0.457	0.553	0.313	0.517	0.417	0.502	0.586	0.425																										0.37775	0.154308	0.0345044
	22	0.094	0.538	0.37	0.258	0.191	0.423	0.319	0.368	0.479	0.424	0.495	0.181	0.433	0.436	0.341	0	0.396	0.304	0.404	0.56																										0.3507	0.145357	0.0325029
	24	0.486	0.253	0.504	0.351	0	0.2	0.32	0.336	0.047	0.371	0.343	0.256	0.269	0.142	0.358	0.436	0.287	0.52	0.401	0.206																										0.3043	0.139656	0.0312281
	26	0.419	0.022	0.281	0.452	0.256	0.091	0.155	0.093	0	0.217	0.367	0.019	0.297	0.412	0	0.209	0.299	0.477	0.178	0.313																										0.22785	0.155232	0.034711
	28	0.081	0.269	0	0.26	0.253	0.396	0.339	0	0.35	0	0	0	0.103	0.327	0.399	0.245	0.211	0.243	0.117	0.075																										0.1834	0.143583	0.0321061
	31	0	0	0.333	0.2	0.229	0.198	0.341	0.189	0.268	0	0.036	0.185	0.26	0.373	0	0.136	0	0.238	0.16	0.076																										0.1611	0.124829	0.0279125
	33	0.306	0.082	0.084	0	0	0	0.186	0.2	0.122	0.039	0	0.024	0	0	0.193	0.191	0	0	0.249	0.141																										0.09085	0.0998764	0.022333
	35	0.082	0.116	0.138	0	0	0	0	0	0.075	0.266	0.229	0.105	0	0.067	0	0	0.076	0.1	0.24	0.208																										0.0851	0.0904258	0.0202198
	37	0	0.032	0	0	0.119	0.059	0.127	0.087	0.289	0	0	0	0.203	0	0	0	0.098	0	0.052	0																										0.0533	0.0803231	0.0179608
	41	0	0	0.077	0	0.142	0.098	0	0.137	0.17	0	0	0	0	0	0.116	0	0	0.135	0	0																										0.04375	0.0635634	0.0142132
	45	0	0	0	0	0	0	0.051	0	0	0	0	0	0.14	0	0	0	0	0	0	0																										0.00955	0.0327486	0.00732281
[truncated: 1 more columns]

## Sheet: Fig7B amb timida
													Original data (F0)																																		Averaged data (shown in Fig. 7B)
	Day	Slug 1	Slug 2	Slug 3	Slug 4	Slug 5	Slug 6	Slug 7	Slug 8	Slug 9	Slug 10	Slug 11	Slug 12	Slug 13	Slug 14	Slug 15	Slug 16	Slug 17	Slug 18	Slug 19	Slug 20	Slug 21	Slug 22	Slug 23	Slug 24	Slug 25	Slug 26	Slug 27	Slug 28	Slug 29	Slug 30	Slug 31	Slug 32	Slug 33	Slug 34	Slug 35	Slug 36	Slug 37	Slug 38	Slug 39	Slug 40	Slug 41	Slug 42	Slug 43	Slug 44	Slug 45	Average	stdev	SE
	0	0.498	0.558	0.44	0.338	0.715	0.64	0.516	0.464	0.521	0.693	0.74	0.492	0.461	0.495	0.55	0.417	0.316	0.315	0.56	0.477	0.381	0.54	0.64	0.407	0.326	0.509	0.51	0.419	0.574	0.575	0.424	0.526	0.585	0.438	0.501	0.461	0.679	0.536	0.446	0.588	0.426	0.433	0.485	0.511	0.405	0.500689	0.101531	0.0151353
	2	0.453	0.496	0.439	0.345	0.393	0.644	0.624	0.479	0.569	0.421	0.532	0.43	0.35	0.53	0.469	0.598	0.242	0.395	0.589	0.369	0.464	0.535	0.388	0.305	0.575	0.487	0.458	0.436	0.565	0.407	0.422	0.699	0.454	0.666	0.356											0.473829	0.105896	0.0178996
	4	0.517	0.512	0.669	0.536	0.594	0.309	0.507	0.51	0.365	0.404	0.534	0.297	0.495	0.472	0.46	0.444	0.357	0.406	0.429	0.37	0.472	0.355	0.39	0.444	0.401	0.542	0.496	0.394	0.509	0.378	0.395	0.421	0.537	0.24	0.323											0.4424	0.0905218	0.015301
	6	0.626	0.448	0.297	0.519	0.5	0.451	0.335	0.451	0.385	0.38	0.49	0.446	0.438	0.458	0.384	0.326	0.324	0.265	0.474	0.416	0.424	0.355	0.266	0.453	0.576	0.675	0.406	0.435	0.496	0.45	0.41	0.344	0.45	0.373	0.412											0.4268	0.0896243	0.0151493
	8	0.395	0.404	0.34	0.385	0.38	0.425	0.454	0.273	0.527	0.398	0.398	0.302	0.321	0.289	0.444	0.373	0.465	0.527	0.346	0.451	0.355	0.305	0.451	0.393	0.235																					0.38544	0.0742743	0.0148549
	10	0.384	0.395	0.499	0.421	0.296	0.305	0.324	0.264	0.367	0.42	0.32	0.305	0.407	0.422	0.448	0.355	0.345	0.412	0.249	0.292	0.399	0.374	0.32	0.306	0.246																					0.355	0.0655267	0.0131053
	12	0.401	0.356	0.4	0.335	0.309	0.336	0.424	0.289	0.16	0.338	0.344	0.344	0.323	0.344	0.289	0.369	0.236	0.502	0.268	0.271																										0.3319	0.0725882	0.0162312
	14	0.356	0.385	0.451	0.352	0.325	0.331	0.198	0.365	0.354	0.535	0.389	0.509	0.313	0.278	0.37	0.371	0.318	0.416	0.3	0.253																										0.35845	0.0794981	0.0177763
	16	0.274	0.395	0.315	0.224	0.165	0.184	0.318	0.233	0.305	0.246	0.259	0.25	0.215	0.224	0.158	0.219	0.255	0.25	0.28	0.258																										0.25135	0.0554392	0.0123966
	18	0.422	0.292	0.325	0.268	0.345	0.161	0.223	0.29	0.33	0.21	0.239	0.306	0.242	0.249	0.226	0.276	0.149	0.198	0.279	0.295																										0.26625	0.0647407	0.0144765
	20	0.224	0.285	0.354	0.226	0.364	0.333	0.136	0.385	0.273	0.263	0.224	0.194	0.249	0.249	0.286	0.236	0.259	0.22	0.281	0.169																										0.2605	0.0635366	0.0142072
	22	0.289	0.287	0.351	0.37	0.287	0.251	0.415	0.328	0.443	0.282	0.218	0.209	0.221	0.224	0.207	0.18	0.289	0.212	0.203	0.221																										0.27435	0.0745409	0.0166679
	24	0.389	0.155	0.18	0.325	0.146	0.276	0.241	0.24	0.34	0.484	0.221	0.334	0.131	0.228	0.176	0.142	0.275	0.184	0.203	0.3																										0.2485	0.092545	0.0206937
	26	0.096	0.176	0.188	0.101	0.199	0.229	0.235	0.219	0.183	0.199	0.199	0.114	0.321	0.375	0.194	0.28	0.3	0.161	0.236	0.105																										0.2055	0.0741233	0.0165745
	28	0.095	0.1	0.279	0.24	0.273	0.053	0.174	0.218	0.254	0.323	0.172	0.098	0.414	0.297	0.164	0.198	0.334	0.248	0.172	0.308																										0.2207	0.0936624	0.0209435
	31	0.023	0.281	0.316	0.246	0.169	0.172	0.266	0.24	0.029	0.175	0.237	0.123	0.108	0.259	0.025	0.266	0.479	0.055	0.109	0.25																										0.1914	0.11549	0.0258243
	33	0.175	0.266	0.015	0.016	0.228	0.203	0.48	0.159	0.183	0.275	0.128	0.065	0.231	0.02	0.204	0.199	0.116	0.034	0.014	0.27																										0.16405	0.118076	0.0264026
	35	0.165	0.02	0.011	0.251	0.154	0.46	0.061	0.01	0.237	0.266	0.27	0.32	0.198	0.199	0.139	0.144	0.02	0.22	0.23	0.024																										0.16995	0.120435	0.0269301
	37	0.08	0.172	0.211	0.165	0.015	0.412	0.009	0.029	0.195	0.135	0.117	0.009	0.009	0.274	0.095	0.014	0.235	0.172	0.189	0.255																										0.1396	0.109739	0.0245384
	41	0.005	0.209	0.446	0.156	0.094	0.271	0.109	0.321	0.074	0.009	0.015	0.071	0.064	0.199	0.245	0.039	0.116	0.013	0.013	0.085																										0.1277	0.120328	0.0269061
	45	0.004	0.006	0.29	0.09	0.004	0.011	0.168	0.094	0.011	0.005	0.033	0.061	0.184	0.275	0.004	0.071	0.008	0.035	0.018	0.258																										0.0815	0.0984819	0.0220212
													Original data (FM)																																		Averaged data (shown in Fig. 7B)
	Day	Slug 1	Slug 2	Slug 3	Slug 4	Slug 5	Slug 6	Slug 7	Slug 8	Slug 9	Slug 10	Slug 11	Slug 12	Slug 13	Slug 14	Slug 15	Slug 16	Slug 17	Slug 18	Slug 19	Slug 20	Slug 21	Slug 22	Slug 23	Slug 24	Slug 25	Slug 26	Slug 27	Slug 28	Slug 29	Slug 30	Slug 31	Slug 32	Slug 33	Slug 34	Slug 35	Slug 36	Slug 37	Slug 38	Slug 39	Slug 40	Slug 41	Slug 42	Slug 43	Slug 44	Slug 45	Average	stdev	SE
	0	2.058	2.394	1.933	1.355	2.558	2.558	2.094	1.991	2.129	2.558	2.558	2.011	2.089	1.909	2.251	1.811	1.284	1.456	2.479	1.915	1.685	2.434	2.558	1.73	1.366	2.186	2.188	1.781	2.558	2.558	1.76	2.487	2.558	1.695	2.31	1.978	2.558	2.296	2.219	2.558	1.881	1.734	2.112	2.274	1.775	2.10289	0.373122	0.0556218
	2	1.891	2.014	1.769	1.43	1.587	2.558	2.558	1.805	2.385	1.675	2.355	1.801	1.347	2.259	1.914	2.525	1.016	1.659	2.41	1.482	1.99	2.336	1.738	1.407	2.558	2.001	1.982	1.87	2.469	1.864	1.725	2.558	1.98	2.558	1.54											1.97189	0.417332	0.0705419
	4	2.22	2.195	2.558	2.217	2.551	1.377	1.988	2.063	1.514	1.625	2.166	1.214	1.96	1.691	1.854	1.826	1.442	1.673	1.814	1.475	2.013	1.423	1.519	1.759	1.683	2.261	2.095	1.677	2.216	1.5	1.696	1.674	2.389	1.008	1.258											1.81697	0.381691	0.0645176
	6	2.335	1.587	1.104	1.931	1.637	1.671	1.205	1.759	1.496	1.413	1.952	1.627	1.489	1.627	1.51	1.314	1.249	0.968	1.837	1.464	1.76	1.395	1.015	1.689	2.406	2.558	1.637	1.716	2.021	1.85	1.558	1.353	1.811	1.478	1.604											1.62931	0.355056	0.0600154
	8	1.391	1.315	1.159	1.371	1.426	1.41	1.624	1.113	1.939	1.519	1.395	1.221	1.229	1.039	1.54	1.43	1.992	2.132	1.33	1.847	1.468	1.151	2.005	1.629	0.751																					1.45704	0.331179	0.0662358
	10	1.258	1.3	1.718	1.549	0.943	0.81	0.945	0.677	1.116	1.341	0.887	0.922	1.286	1.329	1.469	1.076	1.224	1.499	0.978	1.095	1.246	1.279	1.218	1.093	0.83																					1.16352	0.253985	0.050797
	12	1.482	1.292	1.359	1.121	1.063	1.144	1.549	1.106	0.439	1.25	1.302	1.084	1.249	1.208	1.056	1.166	0.728	1.699	0.848	0.964																										1.15545	0.282245	0.0631119
	14	0.78	1.161	1.261	1.039	0.927	1.064	0.506	1.123	0.804	1.636	1.133	1.558	0.725	0.685	1.065	1.248	0.94	1.49	0.873	0.82																										1.0419	0.297553	0.0665348
	16	0.959	1.165	0.99	0.519	0.362	0.433	0.986	0.704	1.104	0.578	0.841	0.825	0.754	0.71	0.347	0.756	0.766	0.772	0.899	0.741																										0.76055	0.228194	0.0510257
	18	1.17	0.804	0.98	0.79	0.931	0.295	0.545	0.802	1.065	0.522	0.619	0.905	0.7	0.637	0.647	0.851	0.314	0.384	0.652	0.922																										0.72675	0.240529	0.053784
	20	0.417	0.711	0.9	0.326	0.777	0.651	0.223	0.864	0.618	0.621	0.465	0.274	0.49	0.601	0.735	0.525	0.563	0.464	0.831	0.237																										0.56465	0.204921	0.0458218
	22	0.539	0.652	0.739	0.909	0.625	0.486	0.838	0.601	0.985	0.681	0.286	0.301	0.33	0.464	0.433	0.255	0.55	0.484	0.451	0.425																										0.5517	0.204516	0.0457312
	24	0.677	0.176	0.269	0.724	0.189	0.566	0.4	0.435	0.542	0.887	0.385	0.794	0.188	0.379	0.33	0.177	0.561	0.31	0.354	0.79																										0.45665	0.224687	0.0502416
	26	0.1	0.253	0.306	0.106	0.297	0.514	0.433	0.4	0.245	0.3	0.365	0.144	0.521	0.614	0.335	0.506	0.671	0.249	0.346	0.125																										0.3415	0.164572	0.0367995
	28	0.1	0.102	0.603	0.318	0.395	0.07	0.258	0.309	0.438	0.482	0.236	0.102	0.589	0.381	0.255	0.289	0.664	0.468	0.241	0.465																										0.33825	0.175464	0.039235
	31	0.025	0.313	0.381	0.25	0.191	0.2	0.37	0.315	0.034	0.225	0.26	0.116	0.12	0.325	0.026	0.378	0.555	0.048	0.149	0.35																										0.23155	0.144733	0.0323633
	33	0.18	0.296	0.02	0.014	0.3	0.3	0.585	0.19	0.25	0.316	0.15	0.063	0.29	0.016	0.236	0.201	0.144	0.041	0.013	0.313																										0.1959	0.145319	0.0324943
	35	0.177	0.021	0.01	0.255	0.161	0.531	0.053	0.014	0.306	0.282	0.316	0.325	0.259	0.2	0.15	0.126	0.016	0.285	0.235	0.013																										0.18675	0.139782	0.0312563
	37	0.086	0.161	0.268	0.179	0.013	0.47	0.013	0.026	0.241	0.154	0.121	0.011	0.013	0.336	0.101	0.018	0.258	0.237	0.174	0.284																										0.1582	0.12822	0.0286708
	41	0.015	0.226	0.498	0.141	0.085	0.278	0.12	0.361	0.065	0.013	0.011	0.073	0.069	0.216	0.284	0.049	0.114	0.019	0.011	0.095																										0.13715	0.133581	0.0298697
	45	0.014	0.013	0.338	0.09	0.013	0.013	0.179	0.104	0.016	0.009	0.03	0.064	0.211	0.279	0.02	0.065	0.013	0.029	0.011	0.278																										0.08945	0.106774	0.0238754
[truncated: 1 more columns]

## Sheet: Fig7B CO2 timida
													Original data (F0)																																		Averaged data (shown in Fig. 7B)
	Day	Slug 1	Slug 2	Slug 3	Slug 4	Slug 5	Slug 6	Slug 7	Slug 8	Slug 9	Slug 10	Slug 11	Slug 12	Slug 13	Slug 14	Slug 15	Slug 16	Slug 17	Slug 18	Slug 19	Slug 20	Slug 21	Slug 22	Slug 23	Slug 24	Slug 25	Slug 26	Slug 27	Slug 28	Slug 29	Slug 30	Slug 31	Slug 32	Slug 33	Slug 34	Slug 35	Slug 36	Slug 37	Slug 38	Slug 39	Slug 40	Slug 41	Slug 42	Slug 43	Slug 44	Slug 45	Average	stdev	SE
	0	0.677	0.535	0.623	0.797	0.482	0.748	0.574	0.739	0.7	0.828	0.656	0.716	0.769	0.846	0.476	0.696	0.705	0.774	0.859	0.856	0.495	0.724	0.479	0.776	0.444	0.539	0.271	0.417	0.489	0.824	0.846	0.591	0.491	0.343	0.573	0.795	0.261	0.585	0.743	0.246	0.458	0.723	0.389	0.301	0.552	0.609133	0.177209	0.0264168
	2	0.489	0.68	0.755	0.596	0.698	0.696	0.626	0.925	0.461	0.551	0.64	0.448	0.595	0.459	0.546	0.681	0.425	0.756	0.709	0.73	0.427	0.56	0.709	0.519	0.245	0.521	0.461	0.46	0.586	0.365	0.401	0.195	0.308	0.254	0.199	0.5336	0.173129	0.0292642								0.510842	0.193385	0.0326881
	4	0.491	0.501	0.649	0.554	0.665	0.526	0.527	0.504	0.75	0.436	0.621	0.346	0.52	0.632	0.606	0.466	0.431	0.651	0.405	0.434	0.466	0.27	0.314	0.239	0.563	0.505	0.398	0.135	0.453	0.311	0.54	0.492	0.321	0.264	0.196	0.462343	0.143943	0.0243308								0.442437	0.162966	0.0275463
	6	0.41	0.715	0.66	0.583	0.772	0.565	0.486	0.38	0.547	0.44	0.525	0.7	0.626	0.581	0.644	0.566	0.338	0.526	0.409	0.33	0.54	0.273	0.54	0.505	0.519	0.146	0.429	0.175	0.269	0.259	0.561	0.35	0.218	0.345	0.273	0.463	0.160294	0.0270947								0.443563	0.175599	0.0296816
	8	0.43	0.601	0.421	0.491	0.581	0.29	0.472	0.409	0.328	0.469	0.57	0.474	0.323	0.34	0.499	0.489	0.316	0.281	0.419	0.23	0.441	0.249	0.308	0.123	0.184	0.38952	0.125131	0.0250261																		0.36706	0.144583	0.0289167
	10	0.165	0.271	0.325	0.354	0.295	0.404	0.305	0.263	0.424	0.454	0.256	0.404	0.421	0.414	0.361	0.291	0.463	0.389	0.385	0.326	0.334	0.391	0.361	0.374	0.133	0.34252	0.0821179	0.0164236																		0.321574	0.109494	0.0218989
	12	0.461	0.254	0.242	0.384	0.297	0.379	0.481	0.355	0.501	0.378	0.282	0.261	0.296	0.449	0.241	0.399	0.114	0.343	0.25	0.145	0.3256	0.106174	0.0237412																							0.302935	0.124615	0.0278648
	14	0.335	0.198	0.383	0.424	0.357	0.401	0.424	0.295	0.414	0.451	0.223	0.258	0.229	0.43	0.193	0.474	0.285	0.292	0.161	0.174	0.32005	0.101915	0.0227889																							0.297641	0.120933	0.0270414
	16	0.235	0.275	0.321	0.14	0.237	0.273	0.198	0.164	0.261	0.261	0.287	0.181	0.069	0.212	0.325	0.171	0.17	0.282	0.299	0.099	0.223	0.0722853	0.0161635																							0.207454	0.0850711	0.0190225
	18	0.039	0.284	0.245	0.3	0.216	0.284	0.31	0.369	0.14	0.289	0.365	0.185	0.224	0.335	0.223	0.258	0.153	0.212	0.391	0.209	0.25155	0.0859642	0.0192222																							0.234249	0.0988382	0.0221009
	20	0.301	0.03	0.225	0.168	0.199	0.284	0.289	0.2	0.323	0.146	0.216	0.336	0.211	0.335	0.188	0.391	0.301	0.35	0.289	0.215	0.24985	0.0854223	0.019101																							0.232668	0.0981961	0.0219573
	22	0.334	0.304	0.145	0.141	0.176	0.326	0.356	0.188	0.361	0.482	0.371	0.175	0.236	0.205	0.326	0.015	0.206	0.147	0.31	0.314	0.2559	0.109638	0.0245157																							0.239481	0.116213	0.0259859
	24	0.381	0.142	0.276	0.388	0.003	0.125	0.305	0.449	0.324	0.199	0.239	0.369	0.16	0.147	0.301	0.316	0.09	0.278	0.256	0.13	0.2439	0.116055	0.0259507																							0.228865	0.119574	0.0267375
	26	0.246	0.066	0.24	0.261	0.344	0.117	0.056	0.093	0.04	0.316	0.17	0.233	0.42	0.263	0.02	0.085	0.205	0.291	0.3	0.244	0.2005	0.113434	0.0253647																							0.1891	0.112763	0.0252147
	28	0.108	0.453	0.028	0.223	0.309	0.352	0.186	0.016	0.261	0.024	0.289	0.023	0.083	0.271	0.253	0.487	0.284	0.281	0.404	0.074	0.22045	0.147295	0.0329363																							0.209117	0.142985	0.0319723
	31	0.014	0.021	0.025	0.201	0.053	0.425	0.284	0.427	0.195	0.026	0.229	0.11	0.282	0.279	0.013	0.255	0.034	0.26	0.146	0.104	0.16915	0.134269	0.0300235																							0.161584	0.128239	0.028675
	33	0.255	0.264	0.42	0.016	0.051	0.016	0.114	0.128	0.226	0.131	0.011	0.05	0.026	0.019	0.248	0.087	0.02	0.023	0.32	0.448	0.14365	0.140658	0.0314521																							0.138642	0.13279	0.0296927
	35	0.53	0.116	0.405	0.034	0.025	0.014	0.036	0.01	0.074	0.078	0.265	0.274	0.019	0.035	0.013	0.019	0.305	0.099	0.286	0.289	0.1463	0.155733	0.0348229																							0.141863	0.146608	0.0327825
	37	0.021	0.46	0.005	0.009	0.076	0.18	0.024	0.306	0.209	0.005	0.025	0.005	0.281	0.054	0.01	0.011	0.221	0.036	0.23	0.015	0.10915	0.132977	0.0297346																							0.106733	0.124812	0.0279088
	41	0.008	0.011	0.172	0.055	0.089	0.52	0.02	0.165	0.219	0.019	0.005	0.021	0.018	0.008	0.189	0.018	0.02	0.04	0.011	0.015	0.08115	0.12452	0.0278436																							0.080718	0.116642	0.026082
	45	0.198	0.366	0.01	0.026	0.01	0.024	0.172	0.011	0.006	0.151	0	0.025	0.101	0.185	0.023	0.011	0.018	0.031	0.021	0.201	0.0795	0.0996248	0.0222768																							0.077887	0.0934677	0.0209
													Original data (FM)																																		Averaged data (shown in Fig. 7B)
	Day	Slug 1	Slug 2	Slug 3	Slug 4	Slug 5	Slug 6	Slug 7	Slug 8	Slug 9	Slug 10	Slug 11	Slug 12	Slug 13	Slug 14	Slug 15	Slug 16	Slug 17	Slug 18	Slug 19	Slug 20	Slug 21	Slug 22	Slug 23	Slug 24	Slug 25	Slug 26	Slug 27	Slug 28	Slug 29	Slug 30	Slug 31	Slug 32	Slug 33	Slug 34	Slug 35	Slug 36	Slug 37	Slug 38	Slug 39	Slug 40	Slug 41	Slug 42	Slug 43	Slug 44	Slug 45	Average	stdev	SE
	0	2.558	2.209	2.558	2.558	2.31	2.558	2.479	2.558	2.558	2.558	2.558	2.558	2.558	2.558	2.076	2.558	2.558	2.558	2.558	2.558	2.165	2.558	2.047	2.558	1.709	2.105	0.416	1.546	1.921	2.558	2.558	2.509	2.252	1.645	2.181	2.558	0.797	2.558	2.558	1.075	2.044	2.558	1.944	1.319	2.292	2.23184	0.51376	0.0765868
	2	2.265	2.558	2.558	2.558	2.558	2.558	2.558	2.558	2.183	2.539	2.558	1.991	2.558	2.156	2.489	2.558	1.837	2.558	2.558	2.558	1.688	2.143	2.558	1.778	0.926	2.249	1.671	1.857	2.478	1.425	1.549	0.679	1.255	0.846	0.26	2.05931	0.638321	0.107896								1.97057	0.723755	0.122337
	4	1.946	2.164	2.558	2.539	2.328	2.405	2.301	1.94	2.558	1.899	2.558	1.416	2.426	2.558	2.558	2.14	1.844	2.558	1.683	1.936	1.51	1.044	1.055	0.723	2.25	2.212	1.518	0.145	1.639	1.063	2.353	1.821	1.144	1.028	0.576	1.83989	0.6568	0.111019								1.76326	0.713436	0.120593
	6	1.484	2.558	0.251	2.199	2.462	2.059	1.916	1.564	1.976	1.661	2.051	2.558	2.447	2.44	2.553	2.296	1.135	2.035	1.601	1.147	2.266	1.106	2.09	2.167	2.087	0.155	1.449	0.499	0.935	1.005	2.325	1.522	0.652	1.264	0.988	1.68294	0.688988	0.11646								1.61556	0.724275	0.122425
	8	1.501	2.236	1.461	1.714	2.188	0.963	1.914	1.484	1.184	1.665	2.252	1.827	1.004	1.202	1.927	2.069	1.255	1.209	1.269	0.855	1.762	0.98	1.087	0.115	0.426	1.42196	0.547949	0.10959																		1.34387	0.59384	0.118768
	10	0.292	0.589	1.149	0.938	1.026	0.931	0.907	0.76	1.03	1.37	0.736	1.063	1.21	1.23	0.999	0.634	1.43	1.268	1.125	0.906	0.891	1.194	1.097	1.189	0.136	0.964	0.309587	0.0619175																		0.908411	0.357758	0.0715516
	12	1.554	0.699	0.835	1.185	0.907	1.084	1.684	1.177	1.681	1.204	0.98	0.785	0.926	1.66	0.637	1.269	0.113	1.279	0.599	0.249	1.02535	0.444121	0.0993085																							0.959816	0.469246	0.104927
	14	0.741	0.524	0.988	1.208	0.976	1.143	1.22	0.889	1.272	1.42	0.487	0.689	0.451	1.15	0.479	1.454	0.655	0.811	0.159	0.266	0.8491	0.382231	0.0854694																							0.7956	0.399498	0.0893305
	16	0.75	0.74	0.874	0.291	0.514	0.689	0.347	0.302	0.599	0.609	0.598	0.451	0.064	0.419	1.012	0.32	0.386	0.781	0.705	0.134	0.52925	0.248988	0.0556753																							0.496474	0.25726	0.057525
	18	0.041	0.561	0.489	0.573	0.376	0.636	0.764	0.799	0.159	0.748	1.004	0.297	0.306	0.656	0.441	0.486	0.282	0.471	0.885	0.345	0.51595	0.247833	0.0554172																							0.48427	0.254764	0.0569669
	20	0.499	0.023	0.401	0.221	0.28	0.569	0.631	0.219	0.5	0.218	0.276	0.551	0.389	0.75	0.274	0.81	0.516	0.703	0.698	0.374	0.4451	0.212134	0.0474347																							0.417681	0.21848	0.0488536
	22	0.369	0.657	0.23	0.19	0.218	0.565	0.522	0.297	0.693	0.838	0.735	0.214	0.416	0.364	0.495	0.018	0.341	0.211	0.52	0.714	0.43035	0.222503	0.0497531																							0.404765	0.224989	0.0503091
	24	0.741	0.19	0.556	0.598	0.01	0.156	0.449	0.676	0.34	0.316	0.364	0.496	0.219	0.171	0.469	0.56	0.126	0.579	0.427	0.164	0.38035	0.206051	0.0460744																							0.358238	0.206437	0.0461608
	26	0.424	0.068	0.334	0.476	0.463	0.129	0.066	0.102	0.038	0.404	0.269	0.237	0.598	0.448	0.011	0.108	0.292	0.556	0.365	0.355	0.28715	0.182977	0.0409149																							0.271915	0.178666	0.039951
	28	0.117	0.62	0.02	0.301	0.414	0.583	0.281	0.013	0.401	0.02	0.284	0.024	0.093	0.403	0.421	0.645	0.36	0.371	0.458	0.08	0.29545	0.208232	0.0465622																							0.280837	0.200963	0.0449367
	31	0.01	0.013	0.038	0.251	0.069	0.53	0.431	0.526	0.266	0.019	0.237	0.135	0.381	0.445	0.014	0.295	0.033	0.341	0.174	0.113	0.21605	0.179999	0.040249																							0.206839	0.171338	0.0383123
	33	0.367	0.287	0.459	0.014	0.051	0.01	0.14	0.16	0.258	0.136	0.009	0.051	0.025	0.014	0.308	0.108	0.015	0.021	0.426	0.521	0.169	0.170647	0.0381579																							0.163383	0.160919	0.0359825
	35	0.578	0.131	0.47	0.02	0.011	0.014	0.026	0.011	0.08	0.106	0.344	0.306	0.015	0.038	0.014	0.016	0.33	0.11	0.376	0.365	0.16805	0.182983	0.0409162																							0.163172	0.172154	0.0384947
	37	0.011	0.475	0.014	0.015	0.086	0.191	0.028	0.335	0.294	0.013	0.026	0.011	0.352	0.044	0.014	0.01	0.245	0.036	0.242	0.016	0.1229	0.147727	0.0330328																							0.120072	0.138687	0.0310114
	41	0.011	0.014	0.186	0.054	0.104	0.576	0.014	0.191	0.264	0.026	0.011	0.013	0.026	0.011	0.214	0.026	0.028	0.046	0.021	0.015	0.09255	0.139035	0.0310892																							0.0918989	0.130247	0.0291241
	45	0.03	0.362	0.023	0.015	0.019	0.033	0.181	0.015	0.033	0.014	0.023	0.005	0.117	0.006	0.021	0.018	0.006	0.018	0.028	0.069	0.0518	0.084512	0.0188975																							0.0517917	0.0791592	0.0177005
[truncated: 1 more columns]

## Sheet: Fig7C amb timida
		Original data (P700 deltaI/I x10³)										After slope correction in Origin (baseline subtraction tool)												Zero levels											Zero levels set											Maximum at onset of light pulse
Time (ms)	Slug 1	Slug 2	Slug 3	Slug 4	Slug 5	Slug 6	Slug 7	Slug 8	Slug 9		Time (ms)	Slug 1	Slug 2	Slug 3	Slug 4	Slug 5	Slug 6	Slug 7	Slug 8	Slug 9		Slug 1	Slug 2	Slug 3	Slug 4	Slug 5	Slug 6	Slug 7	Slug 8	Slug 9		Time (ms)	Slug 1	Slug 2	Slug 3	Slug 4	Slug 5	Slug 6	Slug 7	Slug 8	Slug 9		Slug 1	Slug 2	Slug 3	Slug 4	Slug 5	Slug 6	Slug 7
-198.9	-0.9925	-1.3492	-8.7378	-7.5637	1.5045	-3.6338	0.5233	-0.7336	-0.8442		-198.9	-0.04067	0.013	-0.01075	0	-0.00603	-0.05887	0.02248	0	-0.00636		0.0209844	-0.0221597	0.0136013	0.000538723	-0.00598891	-0.0125422	0.00397919	-0.00942133	0.00445262		-198.9	-0.0616544	0.0351597	-0.0243513	-0.000538723	-4.10935e-05	-0.0463278	0.0185008	0.00942133	-0.0108126		0.346924	0.272121	0.207113	0.387642	0.292239	0.552208	0.352274
-196.8	-0.9649	-1.4245	-8.7253	-7.5834	1.5823	-3.6241	0.4997	-0.7438	-0.8233		-196.8	-0.01304	-0.06333	0.00193	-0.02011	0.07171	-0.05013	-0.00114	-0.01042	0.01437												-196.8	-0.0340244	-0.0411703	-0.0116713	-0.0206487	0.0776989	-0.0375878	-0.00511919	-0.000998666	0.00991738
-194.7	-0.9744	-1.3413	-8.6951	-7.5311	1.549	-3.6094	0.4997	-0.8037	-0.8221		-194.7	-0.02251	0.01884	0.0323	0.03177	0.03835	-0.03638	-0.00116	-0.07054	0.01539												-194.7	-0.0434944	0.0409997	0.0186987	0.0312313	0.0443389	-0.0238378	-0.00513919	-0.0611187	0.0109374
-192.6	-0.9543	-1.3036	-8.6988	-7.5346	1.5255	-3.5716	0.4984	-0.7706	-0.8159		-192.6	-0.00238	0.05551	0.02877	0.02786	0.01479	0.000461899	-0.00248	-0.03766	0.02141												-192.6	-0.0233644	0.0776697	0.0151687	0.0273213	0.0207789	0.0130041	-0.00645919	-0.0282387	0.0169574
-190.5	-0.9088	-1.371	-8.7303	-7.5543	1.5169	-3.557	0.4984	-0.7438	-0.8294		-190.5	0.04315	-0.01292	-0.00256	0.00775	0.00613	0.01411	-0.0025	-0.01108	0.00773												-190.5	0.0221656	0.00923968	-0.0161613	0.00721128	0.0121189	0.0266522	-0.00647919	-0.00165867	0.00327738
-188.4	-0.8272	-1.369	-8.7466	-7.5567	1.5107	-3.5741	0.496	-0.7145	-0.8319		-188.4	0.12478	-0.01195	-0.01869	0.00493	-0.00012583	-0.00395	-0.00492	0.018	0.00505												-188.4	0.103796	0.0102097	-0.0322913	0.00439128	0.00586308	0.0085922	-0.00889919	0.0274213	0.00059738
-186.3	-0.8431	-1.371	-8.7039	-7.5427	1.5255	-3.5936	0.527	-0.7273	-0.8257		-186.3	0.10891	-0.01499	0.02419	0.01852	0.01461	-0.02441	0.02605	0.00498	0.01108												-186.3	0.0879256	0.00716968	0.0105887	0.0179813	0.0205989	-0.0118678	0.0220708	0.0144013	0.00662738
-184.2	-0.8823	-1.3334	-8.7567	-7.5439	1.5144	-3.5485	0.5357	-0.8011	-0.8221		-184.2	0.06974	0.02158	-0.02844	0.01691	0.00345	0.01974	0.03473	-0.06905	0.0145												-184.2	0.0487556	0.0437397	-0.0420413	0.0163713	0.00943891	0.0322822	0.0307508	-0.0596287	0.0100474
-182.1	-0.9173	-1.3274	-8.7202	-7.5334	1.5021	-3.54	0.4997	-0.782	-0.8122		-182.1	0.03477	0.02655	0.00823	0.02699	-0.0089	0.02728	-0.00129	-0.05017	0.02422												-182.1	0.0137856	0.0487097	-0.00537129	0.0264513	-0.00291109	0.0398222	-0.00526919	-0.0407487	0.0197674
-180	-0.9003	-1.3789	-8.7366	-7.5392	1.5144	-3.5997	0.527	-0.7285	-0.8073		-180	0.0518	-0.02598	-0.008	0.02078	0.00334	-0.03337	0.02599	0.00311	0.02894												-180	0.0308156	-0.00382032	-0.0216013	0.0202413	0.00932891	-0.0208278	0.0220108	0.0125313	0.0244874
-177.9	-0.894	-1.3789	-8.7403	-7.5439	1.5082	-3.6094	0.5295	-0.7158	-0.8687		-177.9	0.05813	-0.02701	-0.01152	0.01567	-0.00292	-0.04403	0.02847	0.01559	-0.03264												-177.9	0.0371456	-0.00485032	-0.0251213	0.0151313	0.00306891	-0.0314878	0.0244908	0.0250113	-0.0370926
-175.8	-0.9024	-1.4007	-8.7152	-7.5602	1.5329	-3.5985	0.532	-0.74	-0.8614		-175.8	0.04976	-0.04984	0.01375	-0.00105	0.02172	-0.03409	0.03094	-0.00883	-0.02552												-175.8	0.0287756	-0.0276803	0.00014871	-0.00158872	0.0277089	-0.0215478	0.0269608	0.000591334	-0.0299726
-173.7	-0.9501	-1.3651	-8.7328	-7.5392	1.4984	-3.5558	0.5482	-0.7935	-0.8257		-173.7	0.00209	-0.01527	-0.00368	0.01954	-0.01284	0.00766	0.04712	-0.06255	0.01001												-173.7	-0.0188944	0.00688968	-0.0172813	0.0190013	-0.00685109	0.0202022	0.0431408	-0.0531287	0.00555738
-171.6	-0.949	-1.3532	-8.68	-7.5439	1.5045	-3.5729	0.5084	-0.7566	-0.8466		-171.6	0.00322	-0.0044	0.04929	0.01443	-0.0068	-0.0104	0.0073	-0.02587	-0.01107												-171.6	-0.0177644	0.0177597	0.0356887	0.0138913	-0.000811093	0.0021422	0.00332081	-0.0164487	-0.0155226
-169.5	-0.9151	-1.3551	-8.7202	-7.5381	1.4687	-3.5716	0.5333	-0.7069	-0.8257		-169.5	0.03715	-0.00733	0.00926	0.01982	-0.04266	-0.01005	0.03218	0.02361	0.00965												-169.5	0.0161656	0.0148297	-0.00434129	0.0192813	-0.0366711	0.0024922	0.0282008	0.0330313	0.00519738
-167.4	-0.9056	-1.3888	-8.7341	-7.552	1.5045	-3.5863	0.5159	-0.7005	-0.8343		-167.4	0.04668	-0.04206	-0.00446	0.0055	-0.00692	-0.02571	0.01476	0.02979	0.000872286												-167.4	0.0256956	-0.0199003	-0.0180613	0.00496128	-0.000931093	-0.0131678	0.0107808	0.0392113	-0.00358033
-165.3	-0.912	-1.4146	-8.7089	-7.5532	1.5193	-3.5826	0.5308	-0.7183	-0.8085		-165.3	0.04031	-0.0689	0.02091	0.00389	0.00782	-0.02297	0.02964	0.01177	0.02649												-165.3	0.0193256	-0.0467403	0.00730871	0.00335128	0.0138089	-0.0104278	0.0256608	0.0211913	0.0220374
-163.2	-0.895	-1.3413	-8.6988	-7.5532	1.5132	-3.5521	0.5084	-0.7018	-0.8098		-163.2	0.05734	0.00337	0.03118	0.00348	0.00166	0.00658	0.00721	0.02805	0.02502												-163.2	0.0363556	0.0255297	0.0175787	0.00294128	0.00764891	0.0191222	0.00323081	0.0374713	0.0205674
-161.1	-0.9321	-1.3631	-8.7039	-7.5567	1.4823	-3.5656	0.5308	-0.7133	-0.8135		-161.1	0.02027	-0.01946	0.02625	-0.000437641	-0.0293	-0.00788	0.02959	0.01633	0.02114												-161.1	-0.000714442	0.00269968	0.0126487	-0.000976364	-0.0233111	0.0046622	0.0256108	0.0257513	0.0166874
-159	-0.8823	-1.4166	-8.7315	-7.5962	1.491	-3.5631	0.4761	-0.7056	-0.7803		-159	0.0701	-0.07399	-0.00118	-0.04035	-0.02066	-0.00633	-0.02513	0.0238	0.05416												-159	0.0491156	-0.0518303	-0.0147813	-0.0408887	-0.0146711	0.0062122	-0.0291092	0.0332213	0.0497074
-156.9	-0.8495	-1.4245	-8.724	-7.5765	1.5292	-3.5619	0.496	-0.7209	-0.8171		-156.9	0.10293	-0.08292	0.0065	-0.02106	0.01748	-0.00609	-0.00525	0.00828	0.01718												-156.9	0.0819456	-0.0607603	-0.00710129	-0.0215987	0.0234689	0.0064522	-0.00922919	0.0177013	0.0127274
-154.8	-0.8558	-1.3591	-8.7253	-7.5485	1.5156	-3.5802	0.5121	-0.754	-0.8098		-154.8	0.09666	-0.01855	0.00537	0.00652	0.00382	-0.02535	0.01083	-0.02504	0.0243												-154.8	0.0756756	0.00360968	-0.00823129	0.00598128	0.00980891	-0.0128078	0.00685081	-0.0156187	0.0198474
-152.7	-0.8971	-1.3294	-8.7039	-7.5509	1.4811	-3.5643	0.5233	-0.7769	-0.7704		-152.7	0.05538	0.01012	0.02694	0.00371	-0.03074	-0.0104	0.022	-0.04816	0.06353												-152.7	0.0343956	0.0322797	0.0133387	0.00317128	-0.0247511	0.0021422	0.0180208	-0.0387387	0.0590774
-150.6	-0.912	-1.3274	-8.6775	-7.5543	1.4947	-3.557	0.5109	-0.7311	-0.7901		-150.6	0.04051	0.01109	0.05351	-0.000103653	-0.0172	-0.00406	0.00958	-0.00258	0.04365												-150.6	0.0195256	0.0332497	0.0399087	-0.000642376	-0.0112111	0.0084822	0.00560081	0.00684133	0.0391974
-148.5	-0.8908	-1.3651	-8.6938	-7.566	1.4934	-3.5851	0.5072	-0.6903	-0.7975		-148.5	0.06174	-0.02764	0.03738	-0.01222	-0.01856	-0.03311	0.00586	0.038	0.03607												-148.5	0.0407556	-0.00548032	0.0237787	-0.0127587	-0.0125711	-0.0205678	0.00188081	0.0474213	0.0316174
-146.4	-0.9141	-1.3829	-8.6926	-7.5602	1.4749	-3.5912	0.5022	-0.7018	-0.8061		-146.4	0.03847	-0.04647	0.03876	-0.00683	-0.03712	-0.04017	0.00083951	0.02628	0.02729												-146.4	0.0174856	-0.0243103	0.0251587	-0.00736872	-0.0311311	-0.0276278	-0.00313968	0.0357013	0.0228374
-144.3	-0.9935	-1.373	-8.7077	-7.5602	1.5132	-3.5448	0.5382	-0.7604	-0.811		-144.3	-0.0409	-0.0376	0.02383	-0.00724	0.00112	0.00527	0.03682	-0.03254	0.02221												-144.3	-0.0618844	-0.0154403	0.0102287	-0.00777872	0.00710891	0.0178122	0.0328408	-0.0231187	0.0177574
-142.2	-1.0433	-1.3591	-8.6976	-7.5543	1.523	-3.546	0.5258	-0.768	-0.7975		-142.2	-0.09067	-0.02474	0.0341	-0.00176	0.01086	0.00312	0.0244	-0.04036	0.03553												-142.2	-0.111654	-0.00258032	0.0204987	-0.00229872	0.0168489	0.0156622	0.0204208	-0.0309387	0.0310774
-140.1	-1.0602	-1.3611	-8.7152	-7.5334	1.5206	-3.5326	0.5034	-0.7375	-0.8049		-140.1	-0.10754	-0.02777	0.01667	0.01873	0.0084	0.01556	0.00197	-0.01008	0.02796												-140.1	-0.128524	-0.00561032	0.00306871	0.0181913	0.0143889	0.0281022	-0.00200919	-0.000658666	0.0235074
-138	-0.9925	-1.3987	-8.7177	-7.5474	1.5169	-3.5851	0.5096	-0.7171	-0.8294		-138	-0.03981	-0.0664	0.01435	0.00432	0.00464	-0.03789	0.00815	0.0101	0.00328												-138	-0.0607944	-0.0442403	0.00074871	0.00378128	0.0106289	-0.0253478	0.00417081	0.0195213	-0.00117262
-135.9	-0.9713	-1.3868	-8.7315	-7.5346	1.5082	-3.5814	0.5395	-0.7158	-0.8196		-135.9	-0.01858	-0.05553	0.000717374	0.0167	-0.00412	-0.03515	0.03803	0.01118	0.0129												-135.9	-0.0395644	-0.0333703	-0.0128839	0.0161613	0.00186891	-0.0226078	0.0340508	0.0206013	0.00844738
-133.8	-0.9564	-1.3849	-8.6926	-7.5485	1.4947	-3.5668	0.5407	-0.7362	-0.7913		-133.8	-0.00365	-0.05466	0.03979	0.00239	-0.01768	-0.02151	0.03921	-0.00945	0.04102												-133.8	-0.0246344	-0.0325003	0.0261887	0.00185128	-0.0116911	-0.0089678	0.0352308	-2.86664e-05	0.0365674
-131.7	-0.9533	-1.3433	-8.7014	-7.5241	1.4564	-3.557	0.5357	-0.7413	-0.7815		-131.7	-0.000518037	-0.01409	0.03116	0.02638	-0.05604	-0.01266	0.03419	-0.01477	0.05064												-131.7	-0.0215025	0.00806968	0.0175587	0.0258413	-0.0500511	-0.000117802	0.0302108	-0.00534867	0.0461874
-129.6	-0.9225	-1.3036	-8.7265	-7.5148	1.4613	-3.568	0.5308	-0.7311	-0.8085		-129.6	0.03031	0.02458	0.00623	0.03526	-0.0512	-0.02462	0.02927	-0.00479	0.02347												-129.6	0.00932556	0.0467397	-0.00737129	0.0347213	-0.0452111	-0.0120778	0.0252908	0.00463133	0.0190174
-127.5	-0.9151	-1.3571	-8.7479	-7.5357	1.486	-3.5887	0.5345	-0.7234	-0.7864		-127.5	0.03774	-0.02995	-0.01499	0.01395	-0.02656	-0.04627	0.03294	0.00269	0.04539												-127.5	0.0167556	-0.00779032	-0.0285913	0.0134113	-0.0205711	-0.0337278	0.0289608	0.0121113	0.0409374
-125.4	-0.967	-1.3591	-8.7479	-7.5357	1.5045	-3.5631	0.5084	-0.7769	-0.7975		-125.4	-0.01413	-0.03298	-0.01482	0.01354	-0.00812	-0.02163	0.00682	-0.05103	0.03411												-125.4	-0.0351144	-0.0108203	-0.0284213	0.0130013	-0.00213109	-0.0090878	0.00284081	-0.0416087	0.0296574
-123.3	-0.9755	-1.3314	-8.7366	-7.5322	1.5045	-3.568	0.537	-0.7871	-0.811		-123.3	-0.0226	-0.00631	-0.00335	0.01662	-0.00818	-0.02749	0.0354	-0.06145	0.02043												-123.3	-0.0435844	0.0158497	-0.0169513	0.0160813	-0.00219109	-0.0149478	0.0314208	-0.0520287	0.0159774
-121.2	-0.9925	-1.3353	-8.729	-7.5381	1.491	-3.5497	0.5121	-0.7387	-0.7926		-121.2	-0.03957	-0.01124	0.00442	0.01031	-0.02174	-0.01014	0.01048	-0.01327	0.03865												-121.2	-0.0605544	0.0109197	-0.00918129	0.00977128	-0.0157511	0.0024022	0.00650081	-0.00384867	0.0341974
-119.1	-0.9406	-1.3413	-8.7039	-7.5497	1.4761	-3.5777	0.5159	-0.7082	-0.8135		-119.1	0.01236	-0.01828	0.02969	-0.0017	-0.0367	-0.0391	0.01426	0.01701	0.01758												-119.1	-0.00862444	0.00387968	0.0160887	-0.00223872	-0.0307111	-0.0265578	0.0102808	0.0264313	0.0131274
-117	-0.8802	-1.369	-8.724	-7.5602	1.4934	-3.5643	0.5084	-0.7183	-0.8368		-117	0.07279	-0.04701	0.00977	-0.01261	-0.01946	-0.02665	0.00673	0.00669	-0.0059												-117	0.0518056	-0.0248503	-0.00383129	-0.0131487	-0.0134711	-0.0141078	0.00275081	0.0161113	-0.0103526
-114.9	-0.9014	-1.3353	-8.7517	-7.5799	1.491	-3.5412	0.4984	-0.7234	-0.8036		-114.9	0.05162	-0.01434	-0.01776	-0.03273	-0.02192	-0.00451	-0.00329	0.00137	0.02712												-114.9	0.0306356	0.00781968	-0.0313613	-0.0332687	-0.0159311	0.0080322	-0.00726919	0.0107913	0.0226674
-112.8	-0.9257	-1.2937	-8.7215	-7.5334	1.4922	-3.557	0.5034	-0.7464	-0.8061		-112.8	0.02735	0.02623	0.01261	0.01336	-0.02078	-0.02126	0.00169	-0.02185	0.02444												-112.8	0.00636556	0.0483897	-0.00099129	0.0128213	-0.0147911	-0.0087178	-0.00228919	-0.0124287	0.0199874
-110.7	-0.9607	-1.3135	-8.7315	-7.5683	1.4934	-3.6021	0.496	-0.726	-0.8405		-110.7	-0.00762	0.0054	0.00278	-0.02195	-0.01964	-0.06732	-0.00573	-0.00167	-0.01014												-110.7	-0.0286044	0.0275597	-0.0108213	-0.0224887	-0.0136511	-0.0547778	-0.00970919	0.00775133	-0.0145926
-108.6	-1.0009	-1.373	-8.7416	-7.5369	1.5329	-3.5534	0.4773	-0.726	-0.8073		-108.6	-0.04779	-0.05513	-0.00715	0.00903	0.01981	-0.01958	-0.02445	-0.0019	0.02289												-108.6	-0.0687744	-0.0329703	-0.0207513	0.00849128	0.0257989	-0.0070378	-0.0284292	0.00752133	0.0184374
-106.5	-1.0126	-1.375	-8.7315	-7.566	1.4971	-3.557	0.4972	-0.7515	-0.795		-106.5	-0.05946	-0.05816	0.00313	-0.02048	-0.01605	-0.02413	-0.00457	-0.02762	0.03501												-106.5	-0.0804444	-0.0360003	-0.0104713	-0.0210187	-0.0100611	-0.0115878	-0.00854919	-0.0181987	0.0305574
-104.4	-1.0359	-1.3452	-8.7001	-7.5357	1.5144	-3.5302	0.4997	-0.7744	-0.8282		-104.4	-0.08273	-0.02939	0.0347	0.00941	0.00119	0.00171	-0.0021	-0.05074	0.00163												-104.4	-0.103714	-0.00723032	0.0210987	0.00887128	0.00717891	0.0142522	-0.00607919	-0.0413187	-0.00282262
-102.3	-1.0433	-1.3155	-8.7039	-7.5462	1.4811	-3.5363	0.5109	-0.7718	-0.827		-102.3	-0.0901	-0.000722912	0.03107	-0.00151	-0.03217	-0.00534	0.00908	-0.04836	0.00265												-102.3	-0.111084	0.0214368	0.0174687	-0.00204872	-0.0261811	0.0072022	0.00510081	-0.0389387	-0.00180262
-100.2	-0.9797	-1.3452	-8.7152	-7.5637	1.5156	-3.5302	0.5096	-0.7107	-0.8073		-100.2	-0.02647	-0.03145	0.01994	-0.01942	0.00227	-0.000200667	0.00776	0.01252	0.02217												-100.2	-0.0474544	-0.00929032	0.00633871	-0.0199587	0.00825891	0.0123415	0.00378081	0.0219413	0.0177174
-98.1	-0.895	-1.375	-8.7165	-7.5637	1.5095	-3.5497	0.486	-0.6814	-0.8098		-98.1	0.05826	-0.06228	0.01882	-0.01983	-0.00389	-0.02066	-0.01586	0.0416	0.01949												-98.1	0.0372756	-0.0401203	0.00521871	-0.0203687	0.00209891	-0.0081178	-0.0198392	0.0510213	0.0150374
-96	-0.8717	-1.3353	-8.7341	-7.5555	1.4971	-3.5339	0.4885	-0.7082	-0.8171		-96	0.08159	-0.02362	0.00139	-0.01205	-0.01635	-0.00581	-0.01338	0.01458	0.01202												-96	0.0606056	-0.00146032	-0.0122113	-0.0125887	-0.0103611	0.0067322	-0.0173592	0.0240013	0.00756738
-93.9	-0.8802	-1.3116	-8.7253	-7.552	1.4724	-3.5131	0.4897	-0.7375	-0.8245		-93.9	0.07312	-0.000946611	0.01036	-0.00896	-0.04111	0.01403	-0.01221	-0.01494	0.00444												-93.9	0.0521356	0.0212131	-0.00324129	-0.00949872	-0.0351211	0.0265722	-0.0161892	-0.00551867	-1.26202e-05
-91.8	-0.8887	-1.2799	-8.763	-7.5416	1.4552	-3.5009	0.5183	-0.7667	-0.8135		-91.8	0.06465	0.02972	-0.02717	0.00103	-0.05837	0.02528	0.01637	-0.04436	0.01526												-91.8	0.0436656	0.0518797	-0.0407713	0.000491277	-0.0523811	0.0378222	0.0123908	-0.0349387	0.0108074
-89.7	-0.8982	-1.3492	-8.7341	-7.5497	1.4552	-3.5485	0.4885	-0.7273	-0.8184		-89.7	0.05518	-0.04061	0.0019	-0.00749	-0.05843	-0.02328	-0.01345	-0.00518	0.01018												-89.7	0.0341956	-0.0184503	-0.0117013	-0.00802872	-0.0524411	-0.0107378	-0.0174292	0.00424133	0.00572738
-87.6	-0.9109	-1.3353	-8.7227	-7.5206	1.5341	-3.546	0.4873	-0.7196	-0.8417		-87.6	0.04251	-0.02774	0.01348	0.0212	0.02041	-0.02174	-0.01467	0.0023	-0.0133												-87.6	0.0215256	-0.00558032	-0.00012129	0.0206613	0.0263989	-0.0091978	-0.0186492	0.0117213	-0.0177526
-85.5	-0.9522	-1.3849	-8.7353	-7.5043	1.4774	-3.5302	0.5096	-0.7451	-0.8405		-85.5	0.00124	-0.07837	0.00105	0.03709	-0.03635	-0.00689	0.00761	-0.02342	-0.01227												-85.5	-0.0197444	-0.0562103	-0.0125513	0.0365513	-0.0303611	0.0056522	0.00363081	-0.0139987	-0.0167226
-83.4	-0.9734	-1.3353	-8.6724	-7.4869	1.4761	-3.5351	0.5096	-0.7706	-0.8319		-83.4	-0.01993	-0.0298	0.06412	0.05407	-0.03771	-0.01275	0.00759	-0.04915	-0.00385												-83.4	-0.0409144	-0.00764032	0.0505187	0.0535313	-0.0317211	-0.000207802	0.00361081	-0.0397287	-0.00830262
-81.3	-0.9384	-1.3234	-8.6875	-7.5416	1.4663	-3.5339	0.4984	-0.7617	-0.8073		-81.3	0.0151	-0.01893	0.04919	-0.00104	-0.04757	-0.0125	-0.00364	-0.04047	0.02057												-81.3	-0.00588444	0.00322968	0.0355887	-0.00157872	-0.0415811	4.21976e-05	-0.00761919	-0.0310487	0.0161174
-79.2	-0.9204	-1.4027	-8.7051	-7.5369	1.4749	-3.5716	0.4786	-0.7133	-0.8245		-79.2	0.03312	-0.09926	0.03176	0.00325	-0.03903	-0.05116	-0.02346	0.00771	0.00319												-79.2	0.0121356	-0.0771003	0.0181587	0.00271128	-0.0330411	-0.0386178	-0.0274392	0.0171313	-0.00126262
-77.1	-0.8823	-1.4205	-8.7051	-7.5613	1.5021	-3.5595	0.4525	-0.7005	-0.8466		-77.1	0.07125	-0.11809	0.03194	-0.02157	-0.01189	-0.04002	-0.04958	0.02029	-0.01909												-77.1	0.0502656	-0.0959303	0.0183387	-0.0221087	-0.00590109	-0.0274778	-0.0535592	0.0297113	-0.0235426
-75	-0.9353	-1.4086	-8.7215	-7.5404	1.5132	-3.5363	0.4798	-0.7451	-0.8429		-75	0.01828	-0.10722	0.01571	-0.00108	-0.000850292	-0.01777	-0.0223	-0.02453	-0.01556												-75	-0.00270444	-0.0850603	0.00210871	-0.00161872	0.00513861	-0.0052278	-0.0262792	-0.0151087	-0.0200126
-72.9	-0.9766	-1.3433	-8.7051	-7.5229	1.4959	-3.5302	0.45	-0.7349	-0.8479		-72.9	-0.02299	-0.04296	0.03228	0.01601	-0.01821	-0.01263	-0.05212	-0.01455	-0.02074												-72.9	-0.0439744	-0.0208003	0.0186787	0.0154713	-0.0122211	-8.78024e-05	-0.0560992	-0.00512867	-0.0251926
-70.8	-1.0126	-1.3135	-8.7353	-7.5229	1.4712	-3.5546	0.486	-0.768	-0.8565		-70.8	-0.05896	-0.01419	0.00225	0.01559	-0.04297	-0.03798	-0.01615	-0.04787	-0.02952												-70.8	-0.0799444	0.00796968	-0.0113513	0.0150513	-0.0369811	-0.0254378	-0.0201292	-0.0384487	-0.0339726
-68.7	-1.0168	-1.3215	-8.7403	-7.5683	1.4737	-3.5363	0.4723	-0.7349	-0.8171		-68.7	-0.06313	-0.02322	-0.00258	-0.03022	-0.04053	-0.02064	-0.02987	-0.01499	0.0097												-68.7	-0.0841144	-0.00106032	-0.0161813	-0.0307587	-0.0345411	-0.0080978	-0.0338492	-0.00556867	0.00524738
-66.6	-0.9766	-1.3631	-8.7064	-7.5625	1.5416	-3.5558	0.4848	-0.7298	-0.8331		-66.6	-0.0229	-0.06585	0.0315	-0.02483	0.02731	-0.0411	-0.01739	-0.01011	-0.00648												-66.6	-0.0438844	-0.0436903	0.0178987	-0.0253687	0.0332989	-0.0285578	-0.0213692	-0.000688666	-0.0109326
-64.5	-0.9437	-1.3274	-8.7127	-7.5567	1.5082	-3.5595	0.486	-0.7527	-0.8331		-64.5	0.01003	-0.03118	0.02537	-0.01944	-0.00615	-0.04575	-0.01621	-0.03323	-0.00665												-64.5	-0.0109544	-0.00902032	0.0117687	-0.0199787	-0.000161093	-0.0332078	-0.0201892	-0.0238087	-0.0111026
-62.4	-0.9194	-1.2997	-8.7165	-7.5532	1.4872	-3.5168	0.496	-0.7362	-0.8356		-62.4	0.03436	-0.00451	0.02174	-0.01636	-0.02721	-0.00401	-0.00623	-0.01695	-0.00933												-62.4	0.0133756	0.0176497	0.00813871	-0.0168987	-0.0212211	0.0085322	-0.0102092	-0.00752867	-0.0137826
-60.3	-0.8696	-1.3254	-8.7303	-7.5567	1.4885	-3.529	0.5246	-0.6967	-0.8319		-60.3	0.08419	-0.03124	0.00811	-0.02027	-0.02597	-0.01716	0.02235	0.02233	-0.00581												-60.3	0.0632056	-0.00908032	-0.00549129	-0.0208087	-0.0199811	-0.0046178	0.0183708	0.0317513	-0.0102626
-58.2	-0.8537	-1.3314	-8.7177	-7.545	1.5527	-3.5534	0.5034	-0.7133	-0.8577		-58.2	0.10012	-0.03827	0.02089	-0.00898	0.03817	-0.04252	0.00112	0.00551	-0.03179												-58.2	0.0791356	-0.0161103	0.00728871	-0.00951872	0.0441589	-0.0299778	-0.00285919	0.0149313	-0.0362426
-56.1	-0.8791	-1.3254	-8.7303	-7.552	1.5058	-3.5363	0.5171	-0.6929	-0.8651		-56.1	0.07475	-0.0333	0.00846	-0.0164	-0.00879	-0.02638	0.0148	0.02568	-0.03937												-56.1	0.0537656	-0.0111403	-0.00514129	-0.0169387	-0.00280109	-0.0138378	0.0108208	0.0351013	-0.0438226
-54	-0.9204	-1.3096	-8.7026	-7.5381	1.4835	-3.5022	0.5159	-0.7171	-0.8393		-54	0.03348	-0.01853	0.03633	-0.00291	-0.03115	0.00677	0.01358	0.00126	-0.01375												-54	0.0124956	0.00362968	0.0227287	-0.00344872	-0.0251611	0.0193122	0.00960081	0.0106813	-0.0182026
-51.9	-0.9575	-1.2739	-8.7077	-7.5497	1.4613	-3.5119	0.4835	-0.7082	-0.8393		-51.9	-0.00359	0.01613	0.0314	-0.01492	-0.05341	-0.00389	-0.01884	0.00994	-0.01392												-51.9	-0.0245744	0.0382897	0.0177987	-0.0154587	-0.0474211	0.0086522	-0.0228192	0.0193613	-0.0183726
-49.8	-0.9925	-1.3195	-8.7215	-7.5509	1.5095	-3.4936	0.496	-0.7234	-0.8479		-49.8	-0.03856	-0.0305	0.01777	-0.01654	-0.00527	0.01346	-0.00636	-0.00548	-0.0227												-49.8	-0.0595444	-0.00834032	0.00416871	-0.0170787	0.000718907	0.0260022	-0.0103392	0.00394133	-0.0271526
-47.7	-0.9649	-1.3393	-8.7152	-7.5392	1.5502	-3.5326	0.481	-0.7107	-0.8663		-47.7	-0.01093	-0.05133	0.02425	-0.00525	0.03537	-0.0265	-0.02139	0.007	-0.04128												-47.7	-0.0319144	-0.0291703	0.0106487	-0.00578872	0.0413589	-0.0139578	-0.0253692	0.0164213	-0.0457326
-45.6	-0.9183	-1.3334	-8.7253	-7.5136	1.5317	-3.5022	0.5159	-0.7005	-0.8528		-45.6	0.0357	-0.04646	0.01432	0.01994	0.01681	0.00294	0.01349	0.01698	-0.02796												-45.6	0.0147156	-0.0243003	0.00071871	0.0194013	0.0227989	0.0154822	0.00951081	0.0264013	-0.0324126
-43.5	-0.9278	-1.2838	-8.719	-7.5043	1.4984	-3.4839	0.4922	-0.7196	-0.8393		-43.5	0.02623	0.00211	0.02079	0.02882	-0.01655	0.02029	-0.01023	-0.00234	-0.01464												-43.5	0.00524556	0.0242697	0.00718871	0.0282813	-0.0105611	0.0328322	-0.0142092	0.00708133	-0.0190926
-41.4	-0.8759	-1.2838	-8.7014	-7.5206	1.4848	-3.4766	0.5059	-0.7489	-0.8405		-41.4	0.07816	0.00108	0.03856	0.01211	-0.03021	0.02663	0.00345	-0.03186	-0.01601												-41.4	0.0571756	0.0232397	0.0249587	0.0115713	-0.0242211	0.0391722	-0.000529185	-0.0224387	-0.0204626
-39.3	-0.8887	-1.3532	-8.7353	-7.5753	1.5428	-3.4717	0.4699	-0.7234	-0.8221		-39.3	0.06539	-0.06935	0.00483	-0.043	0.02773	0.03058	-0.03257	-0.00658	0.00221												-39.3	0.0444056	-0.0471903	-0.00877129	-0.0435387	0.0337189	0.0431222	-0.0365492	0.00284133	-0.00224262
-37.2	-0.8685	-1.3532	-8.7391	-7.5753	1.5625	-3.4985	0.4947	-0.712	-0.8479		-37.2	0.08562	-0.07038	0.00121	-0.04342	0.04737	0.00282	-0.00779	0.0046	-0.02377												-37.2	0.0646356	-0.0482203	-0.0123913	-0.0439587	0.0533589	0.0153622	-0.0117692	0.0140213	-0.0282226
-35.1	-0.8569	-1.2997	-8.7265	-7.5811	1.5699	-3.4985	0.5059	-0.7362	-0.8466		-35.1	0.09725	-0.01791	0.01398	-0.04963	0.05472	0.00186	0.00338	-0.01982	-0.02265												-35.1	0.0762656	0.00424968	0.00037871	-0.0501687	0.0607089	0.0144022	-0.000599185	-0.0103987	-0.0271026
-33	-0.8855	-1.2105	-8.724	-7.545	1.523	-3.5144	0.4885	-0.7375	-0.8466		-33	0.06868	0.07026	0.01665	-0.01394	0.00776	-0.01499	-0.01404	-0.02134	-0.02283												-33	0.0476956	0.0924197	0.00304871	-0.0144787	0.0137489	-0.0024478	-0.0180192	-0.0119187	-0.0272826
-30.9	-0.9045	-1.2323	-8.7278	-7.5357	1.5317	-3.5241	0.5183	-0.7234	-0.8577		-30.9	0.04971	0.04743	0.01302	-0.00506	0.0164	-0.02565	0.01574	-0.00747	-0.0341												-30.9	0.0287256	0.0695897	-0.00058129	-0.00559872	0.0223889	-0.0131078	0.0117608	0.00195133	-0.0385526
-28.8	-0.8834	-1.3036	-8.7102	-7.5485	1.5354	-3.5156	0.5159	-0.7183	-0.8429		-28.8	0.07084	-0.02491	0.03079	-0.01827	0.02004	-0.0181	0.01332	-0.00259	-0.01948												-28.8	0.0498556	-0.00275032	0.0171887	-0.0188087	0.0260289	-0.0055578	0.00934081	0.00683133	-0.0239326
-26.7	-0.9003	-1.3373	-8.7328	-7.552	1.5551	-3.5265	0.5022	-0.7349	-0.8466		-26.7	0.05397	-0.05964	0.00837	-0.02218	0.03968	-0.02996	-0.000403068	-0.01941	-0.02336												-26.7	0.0329856	-0.0374803	-0.00523129	-0.0227187	0.0456689	-0.0174178	-0.00438225	-0.00998867	-0.0278126
-24.6	-0.9469	-1.2739	-8.7139	-7.5427	1.5588	-3.4875	0.5072	-0.74	-0.8528		-24.6	0.0074	0.00273	0.02744	-0.0133	0.04332	0.00808	0.00458	-0.02473	-0.02974												-24.6	-0.0135844	0.0248897	0.0138387	-0.0138387	0.0493089	0.0206222	0.000600815	-0.0153087	-0.0341926
-22.5	-1.0041	-1.2601	-8.7466	-7.5346	1.5206	-3.4985	0.5146	-0.7604	-0.8061		-22.5	-0.04977	0.0155	-0.00509	-0.00541	0.00506	-0.00387	0.01195	-0.04535	0.01678												-22.5	-0.0707544	0.0376597	-0.0186913	-0.00594872	0.0110489	0.0086722	0.00797081	-0.0359287	0.0123274
-20.4	-1.0263	-1.2878	-8.7403	-7.5334	1.5218	-3.4961	0.4997	-0.7094	-0.8429		-20.4	-0.07197	-0.01323	0.00138	-0.00443	0.00618	-0.00243	-0.00297	0.00543	-0.0202												-20.4	-0.0929544	0.00892968	-0.0122213	-0.00496872	0.0121689	0.0101122	-0.00694919	0.0148513	-0.0246526
-18.3	-1.0274	-1.262	-8.7416	-7.5753	1.5119	-3.5046	0.5109	-0.7183	-0.8233		-18.3	-0.07319	0.01154	0.000255132	-0.04654	-0.0039	-0.01188	0.00821	-0.00369	-0.000773368												-18.3	-0.0941744	0.0336997	-0.0133462	-0.0470787	0.00208891	0.000662198	0.00423081	0.00573133	-0.00522599
-16.2	-0.9808	-1.2482	-8.7492	-7.5183	1.5206	-3.4729	0.5009	-0.7413	-0.8196		-16.2	-0.0267	0.02431	-0.00714	0.01025	0.00463	0.01886	-0.00181	-0.02691	0.00275												-16.2	-0.0476844	0.0464697	-0.0207413	0.00971128	0.0106189	0.0314022	-0.00578919	-0.0174887	-0.00170262
-14.1	-0.9829	-1.2838	-8.7441	-7.4939	1.5255	-3.4583	0.4773	-0.7413	-0.8282		-14.1	-0.02892	-0.01232	-0.00171	0.03443	0.00936	0.0325	-0.02543	-0.02713	-0.00603												-14.1	-0.0499044	0.00983968	-0.0153113	0.0338913	0.0153489	0.0450422	-0.0294092	-0.0177087	-0.0104826
-12	-0.9787	-1.2541	-8.7403	-7.4822	1.5255	-3.4632	0.5146	-0.7425	-0.8343		-12	-0.02483	0.01618	0.00242	0.04592	0.00919	0.02665	0.01184	-0.02855	-0.01231												-12	-0.0458144	0.0383397	-0.0111813	0.0453813	0.0151789	0.0391922	0.00786081	-0.0191287	-0.0167626
-9.9	-0.9522	-1.2422	-8.7353	-7.5334	1.4922	-3.4912	0.4972	-0.7069	-0.8307		-9.9	0.00155	0.02667	0.00775	-0.0055	-0.02428	-0.00231	-0.00558	0.00683	-0.00889												-9.9	-0.0194344	0.0488297	-0.00585129	-0.00603872	-0.0182911	0.0102322	-0.00955919	0.0162513	-0.0133426
-7.8	-0.894	-1.2898	-8.7466	-7.5357	1.5379	-3.479	0.5183	-0.6967	-0.8454		-7.8	0.05963	-0.02234	-0.00323	-0.00801	0.02125	0.00897	0.01553	0.01698	-0.02368												-7.8	0.0386456	-0.000180321	-0.0168313	-0.00854872	0.0272389	0.0215122	0.0115508	0.0264013	-0.0281326
-5.7	-0.8791	-1.2561	-8.6938	-7.495	1.5576	-3.5046	0.481	-0.7082	-0.8343		-5.7	0.07442	0.00996	0.0499	0.03248	0.04078	-0.01753	-0.02174	0.00551	-0.01263												-5.7	0.0534356	0.0321197	0.0362987	0.0319413	0.0467689	-0.0049878	-0.0257192	0.0149313	-0.0170826
-3.6	-0.859	-1.2759	-8.7378	-7.509	1.5107	-3.4741	0.5034	-0.7145	-0.7975		-3.6	0.0944	-0.01125	0.00623	0.01826	-0.0063	0.01207	0.000696166	-0.00075669	0.02411												-3.6	0.0734156	0.0109097	-0.00737129	0.0177213	-0.000311093	0.0246122	-0.00328302	0.00866464	0.0196574
-1.5	-0.8389	-1.2898	-8.7454	-7.516	1.4971	-3.479	0.532	-0.7069	-0.8343		-1.5	0.11439	-0.02656	-0.00105	0.01105	-0.02007	0.00627	0.02933	0.00688	-0.01274												-1.5	0.0934056	-0.00440032	-0.0146513	0.0105113	-0.0140811	0.0188122	0.0253508	0.0163013	-0.0171926
0.6	-0.698	-1.2125	-8.6372	-7.381	1.5934	-3.2998	0.624	-0.5706	-0.7041		0.6	0.25517	0.04934	0.10748	0.14584	0.07606	0.18457	0.12136	0.14321	0.11741												0.6	0.234186	0.0714997	0.0938787	0.145301	0.0820489	0.197112	0.117381	0.152631	0.112957
2.7	-0.5656	-1.2244	-8.5781	-7.2368	1.7378	-3.0633	0.7558	-0.4343	-0.5345		2.7	0.38746	0.03603	0.16691	0.28982	0.22029	0.42017	0.2532	0.27954	0.28696												2.7	0.366476	0.0581897	0.153309	0.289281	0.226279	0.432712	0.249221	0.288961	0.282507
4.8	-0.6207	-1.1293	-8.5505	-7.1844	1.7909	-2.9573	0.8216	-0.4445	-0.5013		4.8	0.33224	0.12972	0.19483	0.34201	0.27322	0.52527	0.31903	0.26938	0.3201												4.8	0.311256	0.15188	0.181229	0.341471	0.279209	0.537812	0.315051	0.278801	0.315647
6.9	-0.6599	-1.1016	-8.5492	-7.1321	1.7748	-2.9183	0.8142	-0.433	-0.4473		6.9	0.29292	0.15601	0.19646	0.39409	0.25695	0.56337	0.31166	0.28091	0.37405												6.9	0.271936	0.17817	0.182859	0.393551	0.262939	0.575912	0.307681	0.290331	0.369597
9	-0.7404	-1.0798	-8.5454	-7.103	1.7847	-2.889	0.8428	-0.3974	-0.4166		9	0.21231	0.17641	0.20059	0.42298	0.26667	0.59177	0.3403	0.31655	0.4047												9	0.191326	0.19857	0.186989	0.422441	0.272659	0.604312	0.336321	0.325971	0.400247
11.1	-0.7594	-1.0956	-8.5479	-7.117	1.7983	-2.9049	0.8465	-0.3668	-0.4288		11.1	0.19319	0.1592	0.19841	0.40877	0.2801	0.57498	0.34403	0.34718	0.39245												11.1	0.172206	0.18136	0.184809	0.408231	0.286089	0.587522	0.340051	0.356601	0.387997
13.2	-0.787	-1.0659	-8.553	-7.0949	1.8402	-2.9244	0.8801	-0.3897	-0.4129		13.2	0.16548	0.18749	0.19364	0.43065	0.32183	0.55458	0.37767	0.32431	0.40829												13.2	0.144496	0.20965	0.180039	0.430111	0.327819	0.567122	0.373691	0.333731	0.403837
15.3	-0.7584	-1.05	-8.5706	-7.0704	1.8415	-2.8927	0.9111	-0.4076	-0.3748		15.3	0.19396	0.20199	0.17637	0.45494	0.32296	0.58538	0.4087	0.30645	0.44634												15.3	0.172976	0.22415	0.162769	0.454401	0.328949	0.597922	0.404721	0.315871	0.441887
17.4	-0.7266	-0.9866	-8.563	-7.0797	1.8341	-2.9073	0.9024	-0.3974	-0.392		17.4	0.22565	0.26398	0.18429	0.44543	0.31539	0.56988	0.40003	0.31668	0.42909												17.4	0.204666	0.28614	0.170689	0.444891	0.321379	0.582422	0.396051	0.326101	0.424637
19.5	-0.6493	-1.0302	-8.5593	-7.0902	1.818	-2.9	0.8776	-0.3694	-0.408		19.5	0.30283	0.21897	0.18832	0.43471	0.29912	0.57628	0.37527	0.34471	0.41304												19.5	0.281846	0.24113	0.174719	0.434171	0.305109	0.588822	0.371291	0.354131	0.408587
21.6	-0.5349	-1.0421	-8.5454	-7.0902	1.8094	-2.9134	0.8863	-0.3617	-0.4166		21.6	0.41711	0.20567	0.20255	0.4345	0.29035	0.56198	0.384	0.35245	0.40438												21.6	0.396126	0.22783	0.188949	0.433961	0.296339	0.574522	0.380021	0.361871	0.399927
23.7	-0.5359	-1.0619	-8.5341	-7.1088	1.823	-2.911	0.8614	-0.3681	-0.3858		23.7	0.416	0.18446	0.21417	0.41569	0.30377	0.56348	0.35913	0.34608	0.43513												23.7	0.395016	0.20662	0.200569	0.415151	0.309759	0.576022	0.355151	0.355501	0.430677
25.8	-0.484	-0.9985	-8.5341	-7.1158	1.8267	-2.8951	0.9136	-0.4509	-0.419		25.8	0.46778	0.24645	0.2145	0.40847	0.3073	0.57848	0.41137	0.26331	0.40188												25.8	0.446796	0.26861	0.200899	0.407931	0.313289	0.591022	0.407391	0.272731	0.397427
27.9	-0.4798	-0.9549	-8.5228	-7.1146	1.7921	-2.889	0.8999	-0.4101	-0.4153		27.9	0.47187	0.28865	0.22613	0.40946	0.27253	0.58368	0.3977	0.30415	0.40553												27.9	0.450886	0.31081	0.212529	0.408921	0.278519	0.596222	0.393721	0.313571	0.401077
30	-0.4798	-0.949	-8.5165	-7.117	1.7835	-2.911	0.9074	-0.4012	-0.392		30	0.47175	0.29314	0.23275	0.40684	0.26376	0.56079	0.40523	0.31308	0.42877												30	0.450766	0.3153	0.219149	0.406301	0.269749	0.573332	0.401251	0.322501	0.424317
32.1	-0.4629	-0.9807	-8.5077	-7.1321	1.8267	-2.8866	0.8726	-0.4063	-0.408		32.1	0.48854	0.26003	0.24188	0.39153	0.30679	0.58429	0.37047	0.30802	0.41272												32.1	0.467556	0.28219	0.228279	0.390991	0.312779	0.596832	0.366491	0.317441	0.408267
34.2	-0.4586	-0.953	-8.4876	-7.1135	1.8501	-2.911	0.8825	-0.4216	-0.408		34.2	0.49272	0.28633	0.26231	0.40992	0.33002	0.55899	0.3804	0.29275	0.41267												34.2	0.471736	0.30849	0.248709	0.409381	0.336009	0.571532	0.376421	0.302171	0.408217
36.3	-0.4925	-0.8876	-8.5303	-7.1216	1.8427	-2.9134	0.8825	-0.4318	-0.3908		36.3	0.4587	0.35032	0.21993	0.4016	0.32244	0.55569	0.38044	0.28258	0.42982												36.3	0.437716	0.37248	0.206329	0.401061	0.328429	0.568232	0.376461	0.292001	0.425367
38.4	-0.5444	-0.9074	-8.5366	-7.1065	1.7909	-2.9158	0.8838	-0.4178	-0.4092		38.4	0.40669	0.32911	0.21396	0.41649	0.27047	0.55239	0.38177	0.29662	0.41136												38.4	0.385706	0.35127	0.200359	0.415951	0.276459	0.564932	0.377791	0.306041	0.406907
40.5	-0.6027	-0.9748	-8.5454	-7.1111	1.781	-2.9122	0.8763	-0.3897	-0.4264		40.5	0.34827	0.26031	0.20549	0.41168	0.2604	0.55509	0.3743	0.32475	0.39411												40.5	0.327286	0.28247	0.191889	0.411141	0.266389	0.567632	0.370321	0.334171	0.389657
42.6	-0.6514	-1.0223	-8.524	-7.1135	1.8291	-2.9219	0.8714	-0.4076	-0.4018		42.6	0.29946	0.2114	0.22721	0.40906	0.30833	0.54449	0.36944	0.30688	0.41866												42.6	0.278476	0.23356	0.213609	0.408521	0.314319	0.557032	0.365461	0.316301	0.414207
44.7	-0.7086	-1.0084	-8.5303	-7.103	1.86	-2.9012	0.8738	-0.4139	-0.4116		44.7	0.24214	0.22389	0.22124	0.41935	0.33906	0.56429	0.37187	0.30062	0.40881												44.7	0.221156	0.24605	0.207639	0.418811	0.345049	0.576832	0.367891	0.310041	0.404357
46.8	-0.77	-0.9411	-8.5303	-7.0925	1.8057	-2.911	0.8664	-0.4292	-0.4215		46.8	0.18063	0.28979	0.22157	0.42964	0.28459	0.55359	0.3645	0.28535	0.39885												46.8	0.159646	0.31195	0.207969	0.429101	0.290579	0.566132	0.360521	0.294771	0.394397
48.9	-0.6969	-0.9272	-8.5391	-7.1146	1.7588	-2.9207	0.9012	-0.4038	-0.4104		48.9	0.25361	0.30228	0.21309	0.40732	0.23752	0.543	0.39934	0.31079	0.4099												48.9	0.232626	0.32444	0.199489	0.406781	0.243509	0.555542	0.395361	0.320211	0.405447
51	-0.6143	-0.8935	-8.563	-7.1507	1.8094	-2.9195	0.8639	-0.3834	-0.4252		51	0.33609	0.33457	0.18952	0.37101	0.28794	0.5433	0.36207	0.33122	0.39505												51	0.315106	0.35673	0.175919	0.370471	0.293929	0.555842	0.358091	0.340641	0.390597
53.1	-0.5412	-0.953	-8.558	-7.1658	1.8217	-2.9158	0.8129	-0.3821	-0.4067		53.1	0.40908	0.27367	0.19485	0.35569	0.30007	0.5461	0.3111	0.33255	0.41349												53.1	0.388096	0.29583	0.181249	0.355151	0.306059	0.558642	0.307121	0.341971	0.409037
55.2	-0.4745	-0.9906	-8.553	-7.1332	1.8427	-2.9085	0.8365	-0.3948	-0.3981		55.2	0.47566	0.23466	0.20017	0.38808	0.3209	0.5525	0.33474	0.31989	0.42204												55.2	0.454676	0.25682	0.186569	0.387541	0.326889	0.565042	0.330761	0.329311	0.417587
57.3	-0.4554	-0.9668	-8.5505	-7.1053	1.823	-2.8975	0.8403	-0.4012	-0.3834		57.3	0.49465	0.25705	0.203	0.41577	0.30103	0.5626	0.33857	0.31352	0.43669												57.3	0.473666	0.27921	0.189399	0.415231	0.307019	0.575142	0.334591	0.322941	0.432237
59.4	-0.4523	-0.9847	-8.5379	-7.1379	1.8279	-2.9085	0.8502	-0.3834	-0.4288		59.4	0.49763	0.23774	0.21593	0.38295	0.30576	0.5507	0.34851	0.33135	0.39124												59.4	0.476646	0.2599	0.202329	0.382411	0.311749	0.563242	0.344531	0.340771	0.386787
61.5	-0.4544	-1.0282	-8.5429	-7.1693	1.8267	-2.9414	0.8651	-0.3694	-0.4522		61.5	0.49542	0.19284	0.21126	0.35134	0.30439	0.5169	0.36344	0.34539	0.36778												61.5	0.474436	0.215	0.197659	0.350801	0.310379	0.529442	0.359461	0.354811	0.363327
63.6	-0.5021	-1.0401	-8.5316	-7.16	1.8069	-2.9585	0.8353	-0.3923	-0.4424		63.6	0.4476	0.17953	0.22288	0.36043	0.28442	0.4989	0.33367	0.32252	0.37753												63.6	0.426616	0.20169	0.209279	0.359891	0.290409	0.511442	0.329691	0.331941	0.373077
65.7	-0.6016	-1.056	-8.5454	-7.1216	1.8119	-2.9561	0.8365	-0.4598	-0.4485		65.7	0.34798	0.16222	0.20941	0.39861	0.28924	0.5004	0.33491	0.25505	0.37138												65.7	0.326996	0.18438	0.195809	0.398071	0.295229	0.512942	0.330931	0.264471	0.366927
67.8	-0.6662	-0.945	-8.5429	-7.1309	1.7983	-2.9414	0.8378	-0.4369	-0.4534		67.8	0.28327	0.27182	0.21224	0.3891	0.27547	0.51421	0.33624	0.27799	0.36643												67.8	0.262286	0.29398	0.198639	0.388561	0.281459	0.526752	0.332261	0.287411	0.361977
69.9	-0.6705	-0.9787	-8.563	-7.1391	1.802	-2.9414	0.8341	-0.3974	-0.4338		69.9	0.27885	0.23671	0.19246	0.38069	0.279	0.51331	0.33257	0.31752	0.38597												69.9	0.257866	0.25887	0.178859	0.380151	0.284989	0.525852	0.328591	0.326941	0.381517
72	-0.6821	-0.9748	-8.5391	-7.1367	1.8242	-2.9536	0.8341	-0.4152	-0.4497		72	0.26714	0.2392	0.21669	0.38287	0.30103	0.50021	0.33261	0.29976	0.37002												72	0.246156	0.26136	0.203089	0.382331	0.307019	0.512752	0.328631	0.309181	0.365567
74.1	-0.6842	-1.0461	-8.5429	-7.1565	1.8279	-2.9487	0.8254	-0.3923	-0.4387		74.1	0.26492	0.1665	0.21322	0.36286	0.30456	0.50421	0.32394	0.32269	0.38097												74.1	0.243936	0.18866	0.199619	0.362321	0.310549	0.516752	0.319961	0.332111	0.376517
76.2	-0.7488	-1.0065	-8.5291	-7.1379	1.7835	-2.9244	0.8403	-0.4101	-0.4424		76.2	0.20021	0.20469	0.22734	0.38124	0.25999	0.52761	0.33887	0.30492	0.37722												76.2	0.179226	0.22685	0.213739	0.380701	0.265979	0.540152	0.334891	0.314341	0.372767
78.3	-0.7563	-1.0104	-8.5089	-7.1484	1.7403	-2.9256	0.844	-0.4088	-0.4755		78.3	0.19259	0.19938	0.24787	0.37053	0.21661	0.52551	0.34261	0.30626	0.34406												78.3	0.171606	0.22154	0.234269	0.369991	0.222599	0.538052	0.338631	0.315681	0.339607
80.4	-0.7044	-1.0045	-8.4901	-7.1553	1.7625	-2.9536	0.8303	-0.3643	-0.4854		80.4	0.24437	0.20388	0.267	0.36342	0.23864	0.49661	0.32894	0.35079	0.33411												80.4	0.223386	0.22604	0.253399	0.362881	0.244629	0.509152	0.324961	0.360211	0.329657
82.5	-0.6292	-0.9609	-8.5278	-7.1577	1.7872	-2.9183	0.839	-0.3757	-0.4755		82.5	0.31946	0.24607	0.22962	0.3608	0.26317	0.53101	0.33768	0.33942	0.34396												82.5	0.298476	0.26823	0.216019	0.360261	0.269159	0.543552	0.333701	0.348841	0.339507
84.6	-0.6111	-0.9213	-8.5165	-7.1995	1.8143	-2.9146	0.849	-0.4165	-0.4915		84.6	0.33744	0.28426	0.24125	0.31879	0.2901	0.53381	0.34771	0.29866	0.32791												84.6	0.316456	0.30642	0.227649	0.318251	0.296089	0.546352	0.343731	0.308081	0.323457
86.7	-0.5402	-0.9193	-8.5266	-7.1705	1.8044	-2.9292	0.8428	-0.4407	-0.4915		86.7	0.40823	0.28486	0.23148	0.34758	0.28003	0.51832	0.34154	0.27449	0.32785												86.7	0.387246	0.30702	0.217879	0.347041	0.286019	0.530862	0.337561	0.283911	0.323397
88.8	-0.5232	-0.8955	-8.5178	-7.1612	1.7711	-2.9341	0.8179	-0.3872	-0.4583		88.8	0.42511	0.30725	0.2406	0.35666	0.24656	0.51252	0.31668	0.32802	0.361												88.8	0.404126	0.32941	0.226999	0.356121	0.252549	0.525062	0.312701	0.337441	0.356547
90.9	-0.4417	-0.8975	-8.563	-7.1728	1.7933	-2.9256	0.8254	-0.3821	-0.4952		90.9	0.5065	0.30384	0.19573	0.34485	0.26859	0.52012	0.32421	0.33316	0.32405												90.9	0.485516	0.326	0.182129	0.344311	0.274579	0.532662	0.320231	0.342581	0.319597
93	-0.4438	-0.8955	-8.5618	-7.1705	1.8168	-2.9487	0.8365	-0.3757	-0.4731		93	0.50428	0.30444	0.19726	0.34694	0.29191	0.49612	0.33534	0.33959	0.3461												93	0.483296	0.3266	0.183659	0.346401	0.297899	0.508662	0.331361	0.349011	0.341647
95.1	-0.501	-0.9173	-8.5328	-7.2007	1.8081	-2.9475	0.8316	-0.4012	-0.4731		95.1	0.44696	0.28123	0.22658	0.31652	0.28304	0.49642	0.33048	0.31413	0.34604												95.1	0.425976	0.30339	0.212979	0.315981	0.289029	0.508962	0.326501	0.323551	0.341587
97.2	-0.5826	-0.8678	-8.5454	-7.1693	1.7896	-2.9524	0.8154	-0.4101	-0.4977		97.2	0.36525	0.32932	0.21431	0.34771	0.26437	0.49062	0.31431	0.30526	0.32139												97.2	0.344266	0.35148	0.200709	0.347171	0.270359	0.503162	0.310331	0.314681	0.316937
99.3	-0.6345	-0.8698	-8.5831	-7.1705	1.7427	-2.9353	0.8142	-0.3999	-0.4768		99.3	0.31323	0.32592	0.17694	0.34629	0.2173	0.50682	0.31314	0.31549	0.34224												99.3	0.292246	0.34808	0.163339	0.345751	0.223289	0.519362	0.309161	0.324911	0.337787
101.4	-0.6969	-0.9114	-8.5366	-7.1763	1.7946	-2.9366	0.8191	-0.3834	-0.5161		101.4	0.25072	0.28291	0.22376	0.34028	0.26903	0.50462	0.31808	0.33203	0.30288												101.4	0.229736	0.30507	0.210159	0.339741	0.275019	0.517162	0.314101	0.341451	0.298427
103.5	-0.7552	-0.9252	-8.563	-7.1902	1.8168	-2.9609	0.8291	-0.3936	-0.5296		103.5	0.1923	0.2677	0.19769	0.32617	0.29106	0.47942	0.32811	0.32186	0.28933												103.5	0.171316	0.28986	0.184089	0.325631	0.297049	0.491962	0.324131	0.331281	0.284877
105.6	-0.7679	-0.949	-8.5756	-7.1751	1.7884	-2.9378	0.8154	-0.4063	-0.5001		105.6	0.17949	0.2425	0.18542	0.34105	0.26248	0.50163	0.31445	0.30919	0.31878												105.6	0.158506	0.26466	0.171819	0.340511	0.268469	0.514172	0.310471	0.318611	0.314327
107.7	-0.7552	-0.9708	-8.5643	-7.1588	1.7785	-2.9305	0.7955	-0.419	-0.4768		107.7	0.19207	0.21929	0.19704	0.35714	0.25241	0.50803	0.29458	0.29653	0.34203												107.7	0.171086	0.24145	0.183439	0.356601	0.258399	0.520572	0.290601	0.305951	0.337577
109.8	-0.6864	-0.8935	-8.5794	-7.2286	1.7798	-2.9305	0.8017	-0.3694	-0.4706		109.8	0.26075	0.29518	0.18227	0.28713	0.25354	0.50713	0.30081	0.34616	0.34817												109.8	0.239766	0.31734	0.168669	0.286591	0.259529	0.519672	0.296831	0.355581	0.343717
111.9	-0.5826	-0.9371	-8.5655	-7.2158	1.7835	-2.9609	0.8179	-0.4063	-0.4719		111.9	0.36444	0.25017	0.1965	0.29971	0.25707	0.47583	0.31705	0.3093	0.34682												111.9	0.343456	0.27233	0.182899	0.299171	0.263059	0.488372	0.313071	0.318721	0.342367
114	-0.5508	-0.9015	-8.5442	-7.1833	1.7724	-2.9366	0.8167	-0.4407	-0.451		114	0.39612	0.28437	0.21812	0.332	0.2458	0.49923	0.31588	0.27493	0.36767												114	0.375136	0.30653	0.204519	0.331461	0.251789	0.511772	0.311901	0.284351	0.363217
116.1	-0.5105	-0.8995	-8.5291	-7.167	1.7625	-2.9305	0.8191	-0.4623	-0.4645		116.1	0.43631	0.28496	0.23355	0.34808	0.23573	0.50443	0.31831	0.25336	0.35412												116.1	0.415326	0.30712	0.219949	0.347541	0.241719	0.516972	0.314331	0.262781	0.349667
118.2	-0.5158	-0.848	-8.5278	-7.1763	1.7378	-2.928	0.8055	-0.4458	-0.4743		118.2	0.43089	0.33505	0.23518	0.33857	0.21086	0.50603	0.30475	0.2699	0.34426												118.2	0.409906	0.35721	0.221579	0.338031	0.216849	0.518572	0.300771	0.279321	0.339807
120.3	-0.4586	-0.8797	-8.5693	-7.1891	1.7736	-2.9536	0.803	-0.4369	-0.4768		120.3	0.48798	0.30195	0.194	0.32556	0.24648	0.47953	0.30228	0.27883	0.34171												120.3	0.466996	0.32411	0.180399	0.325021	0.252469	0.492072	0.298301	0.288251	0.337257
122.4	-0.4703	-0.9213	-8.5743	-7.2077	1.7724	-2.9573	0.8104	-0.4241	-0.4485		122.4	0.47616	0.25894	0.18933	0.30674	0.24511	0.47493	0.30971	0.29166	0.36996												122.4	0.455176	0.2811	0.175729	0.306201	0.251099	0.487472	0.305731	0.301081	0.365507
124.5	-0.5328	-0.8836	-8.5781	-7.1949	1.7896	-2.939	0.8005	-0.4394	-0.4362		124.5	0.41354	0.29523	0.18586	0.31933	0.26214	0.49233	0.29985	0.2764	0.38221												124.5	0.392556	0.31739	0.172259	0.318791	0.268129	0.504872	0.295871	0.285821	0.377757
126.6	-0.5868	-0.848	-8.5706	-7.1542	1.7452	-2.9524	0.8254	-0.4636	-0.4534		126.6	0.35943	0.32943	0.19368	0.35982	0.21757	0.47804	0.32478	0.25223	0.36495												126.6	0.338446	0.35159	0.180079	0.359281	0.223559	0.490582	0.320801	0.261651	0.360497
128.7	-0.6472	-0.9015	-8.5794	-7.1612	1.7489	-2.939	0.808	-0.4407	-0.4571		128.7	0.29891	0.27452	0.18521	0.3526	0.2211	0.49054	0.30742	0.27516	0.3612												128.7	0.277926	0.29668	0.171609	0.352061	0.227089	0.503082	0.303441	0.284581	0.356747
130.8	-0.644	-0.8836	-8.5505	-7.1914	1.7304	-2.9305	0.8042	-0.4305	-0.4694		130.8	0.302	0.29101	0.21444	0.32219	0.20243	0.49814	0.30365	0.2854	0.34885												130.8	0.281016	0.31317	0.200839	0.321651	0.208419	0.510682	0.299671	0.294821	0.344397
132.9	-0.6821	-0.8797	-8.5215	-7.2135	1.7489	-2.9	0.8291	-0.428	-0.478		132.9	0.26378	0.29351	0.24377	0.29988	0.22076	0.52774	0.32858	0.28793	0.3402												132.9	0.242796	0.31567	0.230169	0.299341	0.226749	0.540282	0.324601	0.297351	0.335747
135	-0.7319	-0.8202	-8.5517	-7.1786	1.7477	-2.9061	0.808	-0.4611	-0.4768		135	0.21387	0.3516	0.21389	0.33456	0.21938	0.52074	0.30752	0.25487	0.34134												135	0.192886	0.37376	0.200289	0.334021	0.225369	0.533282	0.303541	0.264291	0.336887
137.1	-0.7849	-0.8717	-8.5567	-7.1751	1.7452	-2.9012	0.8017	-0.4458	-0.4571		137.1	0.16075	0.29869	0.20922	0.33785	0.21671	0.52474	0.30125	0.2702	0.36099												137.1	0.139766	0.32085	0.195619	0.337311	0.222699	0.537282	0.297271	0.279621	0.356537
139.2	-0.7954	-0.8301	-8.5655	-7.1844	1.7563	-2.9219	0.8216	-0.4305	-0.4583		139.2	0.15013	0.33889	0.20075	0.32833	0.22764	0.50314	0.32118	0.28553	0.35974												139.2	0.129146	0.36105	0.187149	0.327791	0.233629	0.515682	0.317201	0.294951	0.355287
141.3	-0.7446	-0.8618	-8.5806	-7.1879	1.7304	-2.9341	0.8117	-0.405	-0.4719		141.3	0.20082	0.30578	0.18597	0.32462	0.20157	0.49004	0.31132	0.31107	0.34609												141.3	0.179836	0.32794	0.172369	0.324081	0.207559	0.502582	0.307341	0.320491	0.341637
143.4	-0.7033	-0.8519	-8.5693	-7.203	1.7575	-2.9231	0.7794	-0.3885	-0.4792		143.4	0.242	0.31427	0.1976	0.30931	0.2285	0.50014	0.27905	0.3276	0.33873												143.4	0.221016	0.33643	0.183999	0.308771	0.234489	0.512682	0.275071	0.337021	0.334277
145.5	-0.6493	-0.8797	-8.5366	-7.1914	1.7588	-2.9366	0.7769	-0.4165	-0.4571		145.5	0.29589	0.28507	0.23063	0.32069	0.22963	0.48575	0.27658	0.29963	0.36078												145.5	0.274906	0.30723	0.217029	0.320151	0.235619	0.498292	0.272601	0.309051	0.356327
147.6	-0.5889	-0.8004	-8.5505	-7.1902	1.7279	-2.9353	0.7645	-0.4025	-0.4571		147.6	0.35617	0.36296	0.21705	0.32168	0.19855	0.48615	0.26422	0.31367	0.36073												147.6	0.335186	0.38512	0.203449	0.321141	0.204539	0.498692	0.260241	0.323091	0.356277
149.7	-0.5412	-0.8797	-8.5605	-7.1961	1.7131	-2.9231	0.7893	-0.3987	-0.5284		149.7	0.40375	0.28225	0.20738	0.31557	0.18358	0.49745	0.28905	0.3175	0.28937												149.7	0.382766	0.30441	0.193779	0.315031	0.189569	0.509992	0.285071	0.326921	0.284917
151.8	-0.484	-0.8915	-8.5945	-7.1937	1.7119	-2.95	0.793	-0.4127	-0.5063		151.8	0.46084	0.26905	0.17371	0.31775	0.18221	0.46965	0.29279	0.30353	0.31142												151.8	0.439856	0.29121	0.160109	0.317211	0.188199	0.482192	0.288811	0.312951	0.306967
153.9	-0.5116	-0.9133	-8.5693	-7.2123	1.7316	-2.9341	0.8067	-0.4267	-0.4878		153.9	0.43312	0.24584	0.19923	0.29894	0.20174	0.48465	0.30652	0.28957	0.32987												153.9	0.412136	0.268	0.185629	0.298401	0.207729	0.497192	0.302541	0.298991	0.325417
156	-0.5762	-0.8004	-8.5882	-7.1995	1.7427	-2.9195	0.7993	-0.4343	-0.4706		156	0.36841	0.35733	0.18066	0.31153	0.21267	0.49835	0.29915	0.282	0.34702												156	0.347426	0.37949	0.167059	0.310991	0.218659	0.510892	0.295171	0.291421	0.342567
158.1	-0.6514	-0.8281	-8.5756	-7.1972	1.6909	-2.9536	0.808	-0.4063	-0.478		158.1	0.29309	0.32823	0.19359	0.31361	0.1607	0.46335	0.30789	0.31004	0.33956												158.1	0.272106	0.35039	0.179989	0.313071	0.166689	0.475892	0.303911	0.319461	0.335107
160.2	-0.7181	-0.8638	-8.592	-7.2135	1.7255	-2.9463	0.7968	-0.4012	-0.4829		160.2	0.22628	0.29112	0.17751	0.2971	0.19513	0.46975	0.29672	0.31517	0.33461												160.2	0.205296	0.31328	0.163909	0.296561	0.201119	0.482292	0.292741	0.324591	0.330157
162.3	-0.7308	-0.8836	-8.558	-7.2344	1.7341	-2.9426	0.8241	-0.3846	-0.478		162.3	0.21346	0.26991	0.21184	0.27598	0.20355	0.47255	0.32405	0.3318	0.33946												162.3	0.192476	0.29207	0.198239	0.275441	0.209539	0.485092	0.320071	0.341221	0.335007
164.4	-0.7361	-0.8975	-8.5416	-7.2356	1.7538	-2.9341	0.8154	-0.4292	-0.4891		164.4	0.20804	0.25461	0.22857	0.27457	0.22308	0.48016	0.31539	0.28724	0.32831												164.4	0.187056	0.27677	0.214969	0.274031	0.229069	0.492702	0.311411	0.296661	0.323857
166.5	-0.7478	-0.84	-8.558	-7.2019	1.7415	-2.9244	0.8154	-0.4789	-0.5026		166.5	0.19623	0.3107	0.21249	0.30806	0.21061	0.48896	0.31542	0.23757	0.31475												166.5	0.175246	0.33286	0.198889	0.307521	0.216599	0.501502	0.311441	0.246991	0.310297
168.6	-0.7139	-0.8737	-8.5555	-7.203	1.6724	-2.9158	0.8129	-0.4139	-0.5112		168.6	0.23001	0.27559	0.21532	0.30674	0.14134	0.49666	0.31295	0.3026	0.3061												168.6	0.209026	0.29775	0.201719	0.306201	0.147329	0.509202	0.308971	0.312021	0.301647
170.7	-0.662	-0.8638	-8.5479	-7.1937	1.6971	-2.9305	0.7906	-0.3936	-0.5284		170.7	0.2818	0.28408	0.22325	0.31583	0.16587	0.48106	0.29069	0.32294	0.28885												170.7	0.260816	0.30624	0.209649	0.315291	0.171859	0.493602	0.286711	0.332361	0.284397
172.8	-0.6249	-0.8717	-8.5693	-7.231	1.7082	-2.9329	0.7781	-0.405	-0.5198		172.8	0.31878	0.27478	0.20217	0.27832	0.1768	0.47776	0.27822	0.31157	0.2974												172.8	0.297796	0.29694	0.188569	0.277781	0.182789	0.490302	0.274241	0.320991	0.292947
174.9	-0.6345	-0.8262	-8.5781	-7.1926	1.7464	-2.9146	0.793	-0.4216	-0.5357		174.9	0.30907	0.31887	0.1937	0.3165	0.21482	0.49516	0.29316	0.29501	0.28144												174.9	0.288086	0.34103	0.180099	0.315961	0.220809	0.507702	0.289181	0.304431	0.276987
177	-0.6599	-0.7786	-8.5668	-7.174	1.7045	-2.9195	0.7781	-0.442	-0.5112		177	0.28355	0.36506	0.20533	0.33489	0.17275	0.48936	0.27829	0.27464	0.30589												177	0.262566	0.38722	0.191729	0.334351	0.178739	0.501902	0.274311	0.284061	0.301437
179.1	-0.626	-0.7509	-8.6058	-7.1658	1.6835	-2.9231	0.7769	-0.4445	-0.5026		179.1	0.31733	0.39136	0.16665	0.34288	0.15158	0.48486	0.27712	0.27217	0.31444												179.1	0.296346	0.41352	0.153049	0.342341	0.157569	0.497402	0.273141	0.281591	0.309987
181.2	-0.5434	-0.7846	-8.6083	-7.1577	1.7279	-2.9244	0.7471	-0.428	-0.5296		181.2	0.39982	0.35625	0.16448	0.35076	0.19581	0.48266	0.24736	0.28871	0.28739												181.2	0.378836	0.37841	0.150879	0.350221	0.201799	0.495202	0.243381	0.298131	0.282937
183.3	-0.5328	-0.7984	-8.5907	-7.1705	1.7353	-2.9292	0.7421	-0.4343	-0.5333		183.3	0.4103	0.34104	0.18241	0.33775	0.20304	0.47697	0.24239	0.28244	0.28363												183.3	0.389316	0.3632	0.168809	0.337211	0.209029	0.489512	0.238411	0.291861	0.279177
185.4	-0.5423	-0.7826	-8.5781	-7.1763	1.7168	-2.8914	0.7495	-0.4496	-0.5468		185.4	0.40069	0.35544	0.19533	0.33173	0.18437	0.51387	0.24982	0.26717	0.27008												185.4	0.379706	0.3776	0.181729	0.331191	0.190359	0.526412	0.245841	0.276591	0.265627
187.5	-0.5995	-0.735	-8.5731	-7.1309	1.6995	-2.9231	0.7707	-0.4343	-0.5566		187.5	0.34337	0.40163	0.20066	0.37692	0.1669	0.48127	0.27106	0.28251	0.26023												187.5	0.322386	0.42379	0.187059	0.376381	0.172889	0.493812	0.267081	0.291931	0.255777
189.6	-0.6493	-0.7885	-8.5743	-7.1193	1.6958	-2.9487	0.7744	-0.3999	-0.5616		189.6	0.29346	0.34672	0.19979	0.38831	0.16302	0.45477	0.27479	0.31694	0.25518												189.6	0.272476	0.36888	0.186189	0.387771	0.169009	0.467312	0.270811	0.326361	0.250727
191.7	-0.6758	-0.7766	-8.5894	-7.1251	1.6921	-2.9292	0.7732	-0.363	-0.5198		191.7	0.26684	0.35722	0.18501	0.38229	0.15915	0.47337	0.27362	0.35387	0.29692												191.7	0.245856	0.37938	0.171409	0.381751	0.165139	0.485912	0.269641	0.363291	0.292467
193.8	-0.7107	-0.7846	-8.5982	-7.1402	1.7255	-2.9402	0.7533	-0.3961	-0.5149		193.8	0.23182	0.34781	0.17654	0.36698	0.19238	0.46147	0.25376	0.32081	0.30177												193.8	0.210836	0.36997	0.162939	0.366441	0.198369	0.474012	0.249781	0.330231	0.297317
195.9	-0.8029	-0.8361	-8.5542	-7.1042	1.7008	-2.9024	0.7732	-0.4407	-0.4927		195.9	0.13951	0.2949	0.22087	0.40277	0.16751	0.49837	0.27369	0.27624	0.32392												195.9	0.118526	0.31706	0.207269	0.402231	0.173499	0.510912	0.269711	0.285661	0.319467
198	-0.7954	-0.7905	-8.6108	-7.1193	1.7008	-2.9134	0.7831	-0.4522	-0.4927		198	0.14689	0.3391	0.16459	0.38745	0.16734	0.48647	0.28363	0.26478	0.32386												198	0.125906	0.36126	0.150989	0.386911	0.173329	0.499012	0.279651	0.274201	0.319407
200.1	-0.7414	-0.8004	-8.5681	-7.1332	1.6798	-2.9512	0.7545	-0.4229	-0.4915		200.1	0.20078	0.32779	0.20762	0.37334	0.14617	0.44777	0.25506	0.29411	0.32501												200.1	0.179796	0.34995	0.194019	0.372801	0.152159	0.460312	0.251081	0.303531	0.320557
202.2	-0.6842	-0.8163	-8.5995	-7.146	1.7106	-2.9475	0.7819	-0.4076	-0.5001		202.2	0.25786	0.31048	0.17655	0.36032	0.1768	0.45058	0.28249	0.30944	0.31636												202.2	0.236876	0.33264	0.162949	0.359781	0.182789	0.463122	0.278511	0.318861	0.311907
204.3	-0.5963	-0.7667	-8.5718	-7.1367	1.6921	-2.9146	0.7595	-0.4127	-0.5259		204.3	0.34565	0.35868	0.20458	0.36941	0.15812	0.48258	0.26013	0.30438	0.29051												204.3	0.324666	0.38084	0.190979	0.368871	0.164109	0.495122	0.256151	0.313801	0.286057
206.4	-0.5836	-0.7529	-8.5781	-7.1402	1.7057	-2.8659	0.7732	-0.428	-0.5198		206.4	0.35823	0.37107	0.1986	0.3657	0.17155	0.53038	0.27386	0.28911	0.29655												206.4	0.337246	0.39323	0.184999	0.365161	0.177539	0.542922	0.269881	0.298531	0.292097
208.5	-0.5953	-0.743	-8.5819	-7.1484	1.6921	-2.9024	0.7632	-0.4178	-0.5296		208.5	0.34641	0.37956	0.19513	0.35728	0.15778	0.49298	0.26389	0.29934	0.2867												208.5	0.325426	0.40172	0.181529	0.356741	0.163769	0.505522	0.259911	0.308761	0.282247
210.6	-0.6016	-0.7529	-8.6096	-7.1647	1.6798	-2.9122	0.7558	-0.3872	-0.5284		210.6	0.34	0.36826	0.16776	0.34077	0.14531	0.48228	0.25653	0.32998	0.28785												210.6	0.319016	0.39042	0.154159	0.340231	0.151299	0.494822	0.252551	0.339401	0.283397
212.7	-0.6292	-0.735	-8.5492	-7.1833	1.7119	-2.9195	0.7645	-0.3732	-0.5345		212.7	0.31228	0.38475	0.22848	0.32196	0.17724	0.47408	0.26526	0.34401	0.2817												212.7	0.291296	0.40691	0.214879	0.321421	0.183229	0.486622	0.261281	0.353431	0.277247
214.8	-0.6885	-0.733	-8.5467	-7.167	1.7119	-2.9097	0.7794	-0.442	-0.5308		214.8	0.25287	0.38534	0.23131	0.33804	0.17707	0.48298	0.28019	0.27524	0.28534												214.8	0.231886	0.4075	0.217709	0.337501	0.183059	0.495522	0.276211	0.284661	0.280887
216.9	-0.7383	-0.6914	-8.5479	-7.146	1.7242	-2.889	0.7707	-0.4687	-0.5308		216.9	0.20295	0.42554	0.23044	0.35883	0.18919	0.50278	0.27153	0.24858	0.28529												216.9	0.181966	0.4477	0.216839	0.358291	0.195179	0.515322	0.267551	0.258001	0.280837
219	-0.7647	-0.743	-8.5693	-7.1693	1.7057	-2.8951	0.7645	-0.4445	-0.5075		219	0.17644	0.37253	0.20936	0.33532	0.17052	0.49578	0.26536	0.27281	0.30854												219	0.155456	0.39469	0.195759	0.334781	0.176509	0.508322	0.261381	0.282231	0.304087
221.1	-0.7266	-0.7568	-8.5731	-7.1414	1.6724	-2.9244	0.7769	-0.419	-0.5075		221.1	0.21442	0.35732	0.20589	0.363	0.13705	0.46559	0.2778	0.29835	0.30849												221.1	0.193436	0.37948	0.192289	0.362461	0.143039	0.478132	0.273821	0.307771	0.304037
223.2	-0.7054	-0.7905	-8.5706	-7.1437	1.6749	-2.911	0.7682	-0.4305	-0.5124		223.2	0.2355	0.32221	0.20872	0.36049	0.13938	0.47809	0.26913	0.28688	0.30353												223.2	0.214516	0.34437	0.195119	0.359951	0.145369	0.490632	0.265151	0.296301	0.299077
225.3	-0.7425	-0.8222	-8.5618	-7.1425	1.6674	-2.8561	0.7632	-0.4534	-0.5443		225.3	0.19829	0.28911	0.21784	0.36147	0.13171	0.53209	0.26416	0.26401	0.27158												225.3	0.177306	0.31127	0.204239	0.360931	0.137699	0.544632	0.260181	0.273431	0.267127
227.4	-0.7308	-0.7667	-8.558	-7.1344	1.6415	-2.8585	0.7719	-0.4763	-0.5382		227.4	0.20987	0.3432	0.22197	0.36936	0.10564	0.52879	0.2729	0.24115	0.27763												227.4	0.188886	0.36536	0.208369	0.368821	0.111629	0.541332	0.268921	0.250571	0.273177
229.5	-0.7308	-0.7766	-8.5505	-7.1658	1.6465	-2.8927	0.7819	-0.4662	-0.5222		229.5	0.20976	0.33189	0.2298	0.33775	0.11047	0.49369	0.28293	0.25128	0.29358												229.5	0.188776	0.35405	0.216199	0.337211	0.116459	0.506232	0.278951	0.260701	0.289127
231.6	-0.6864	-0.8064	-8.5567	-7.1507	1.644	-2.9292	0.762	-0.3872	-0.553		231.6	0.25404	0.30069	0.22392	0.35263	0.10779	0.45629	0.26306	0.33031	0.26272												231.6	0.233056	0.32285	0.210319	0.352091	0.113779	0.468832	0.259081	0.339731	0.258267
233.7	-0.6567	-0.8222	-8.5467	-7.1553	1.6773	-2.9353	0.7794	-0.428	-0.5443		233.7	0.28363	0.28348	0.23425	0.34782	0.14092	0.44929	0.2805	0.28955	0.27137												233.7	0.262646	0.30564	0.220649	0.347281	0.146909	0.461832	0.276521	0.298971	0.266917
235.8	-0.6938	-0.7905	-8.5416	-7.1356	1.6625	-2.9158	0.7781	-0.4713	-0.5493		235.8	0.24641	0.31377	0.23968	0.36731	0.12595	0.46789	0.27923	0.24628	0.26632												235.8	0.225426	0.33593	0.226079	0.366771	0.131939	0.480432	0.275251	0.255701	0.261867
237.9	-0.6683	-0.7509	-8.5655	-7.1553	1.6378	-2.8988	0.7682	-0.4394	-0.5345		237.9	0.27179	0.35197	0.2161	0.34739	0.10108	0.48399	0.26936	0.27822	0.28107												237.9	0.250806	0.37413	0.202499	0.346851	0.107069	0.496532	0.265381	0.287641	0.276617
240	-0.5953	-0.7964	-8.5316	-7.146	1.6317	-2.8841	0.7781	-0.4152	-0.5161		240	0.34468	0.30506	0.25033	0.35648	0.09481	0.4978	0.2793	0.30245	0.29941												240	0.323696	0.32722	0.236729	0.355941	0.100799	0.510342	0.275321	0.311871	0.294957
242.1	-0.5794	-0.7984	-8.5278	-7.16	1.6884	-2.9231	0.7756	-0.3923	-0.5247		242.1	0.36046	0.30165	0.25446	0.34227	0.15134	0.4579	0.27683	0.32538	0.29076												242.1	0.339476	0.32381	0.240859	0.341731	0.157329	0.470442	0.272851	0.334801	0.286307
244.2	-0.6143	-0.7529	-8.5718	-7.1623	1.6662	-2.911	0.7868	-0.419	-0.537		244.2	0.32545	0.34575	0.21078	0.33975	0.12896	0.4691	0.28807	0.29872	0.27841												244.2	0.304466	0.36791	0.197179	0.339211	0.134949	0.481642	0.284091	0.308141	0.273957
246.3	-0.6503	-0.7053	-8.5404	-7.1635	1.66	-2.8671	0.8042	-0.4687	-0.5407		246.3	0.28933	0.39194	0.24251	0.33834	0.12259	0.5121	0.3055	0.24905	0.27466												246.3	0.268346	0.4141	0.228909	0.337801	0.128579	0.524642	0.301521	0.258471	0.270207
248.4	-0.7446	-0.7548	-8.5731	-7.1774	1.6391	-2.8768	0.7694	-0.4432	-0.5161		248.4	0.19492	0.34103	0.21014	0.32422	0.10152	0.5015	0.27073	0.27458	0.2992												248.4	0.173936	0.36319	0.196539	0.323681	0.107509	0.514042	0.266751	0.284001	0.294747
250.5	-0.7552	-0.7568	-8.5907	-7.1972	1.66	-2.8975	0.7732	-0.4012	-0.5038		250.5	0.1842	0.33763	0.19286	0.30421	0.12225	0.4799	0.27457	0.31662	0.31145												250.5	0.163216	0.35979	0.179259	0.303671	0.128239	0.492442	0.270591	0.326041	0.306997
252.6	-0.7594	-0.7846	-8.5869	-7.1868	1.6502	-2.9366	0.7508	-0.3999	-0.5185		252.6	0.17988	0.30842	0.19699	0.3144	0.11228	0.4399	0.2522	0.31795	0.2967												252.6	0.158896	0.33058	0.183389	0.313861	0.118269	0.452442	0.248221	0.327371	0.292247
254.7	-0.7637	-0.844	-8.5593	-7.1565	1.6674	-2.8975	0.7582	-0.47	-0.5345		254.7	0.17547	0.24761	0.22492	0.34448	0.12931	0.4781	0.25963	0.24788	0.28064												254.7	0.154486	0.26977	0.211319	0.343941	0.135299	0.490642	0.255651	0.257301	0.276187
256.8	-0.7796	-0.8321	-8.5593	-7.1798	1.665	-2.8988	0.7682	-0.4929	-0.5431		256.8	0.15945	0.25811	0.22524	0.32097	0.12674	0.4759	0.26967	0.22502	0.27199												256.8	0.138466	0.28027	0.211639	0.320431	0.132729	0.488442	0.265691	0.234441	0.267537
258.9	-0.7467	-0.7687	-8.5555	-7.1577	1.6366	-2.8841	0.7707	-0.4318	-0.5345		258.9	0.19224	0.3201	0.22937	0.34286	0.09816	0.48971	0.2722	0.28615	0.28054												258.9	0.171256	0.34226	0.215769	0.342321	0.104149	0.502252	0.268221	0.295571	0.276087
261	-0.6736	-0.7925	-8.5907	-7.1344	1.6354	-2.9036	0.7582	-0.4165	-0.5812		261	0.26522	0.29489	0.1945	0.36594	0.09679	0.46931	0.25974	0.30149	0.23379												261	0.244236	0.31705	0.180899	0.365401	0.102779	0.481852	0.255761	0.310911	0.229337
263.1	-0.6323	-0.8064	-8.5655	-7.1181	1.6736	-2.9329	0.7396	-0.433	-0.5321		263.1	0.30641	0.27959	0.22002	0.38203	0.13482	0.43911	0.24117	0.28502	0.28283												263.1	0.285426	0.30175	0.206419	0.381491	0.140809	0.451652	0.237191	0.294441	0.278377
265.2	-0.6313	-0.7568	-8.5391	-7.1484	1.6465	-2.8914	0.7421	-0.4572	-0.5493		265.2	0.30729	0.32778	0.24675	0.35152	0.10755	0.47971	0.2437	0.26085	0.26558												265.2	0.286306	0.34994	0.233149	0.350981	0.113539	0.492252	0.239721	0.270271	0.261127
267.3	-0.6747	-0.7707	-8.5416	-7.1181	1.6415	-2.8878	0.7595	-0.4572	-0.553		267.3	0.26377	0.31247	0.24458	0.3816	0.10238	0.48241	0.26114	0.26089	0.26183												267.3	0.242786	0.33463	0.230979	0.381061	0.108369	0.494952	0.257161	0.270311	0.257377
269.4	-0.6609	-0.739	-8.5567	-7.1332	1.6637	-2.8829	0.7781	-0.3859	-0.5431		269.4	0.27746	0.34277	0.22981	0.36629	0.12441	0.48641	0.27977	0.33222	0.27168												269.4	0.256476	0.36493	0.216209	0.365751	0.130399	0.498952	0.275791	0.341641	0.267227
271.5	-0.5931	-0.7885	-8.5907	-7.1658	1.6921	-2.9061	0.7856	-0.3872	-0.5665		271.5	0.34514	0.29186	0.19613	0.33347	0.15264	0.46231	0.2873	0.33095	0.24822												271.5	0.324156	0.31402	0.182529	0.332931	0.158629	0.474852	0.283321	0.340371	0.243767
273.6	-0.6133	-0.7727	-8.524	-7.1553	1.6872	-2.911	0.7645	-0.4522	-0.5677		273.6	0.32483	0.30625	0.26316	0.34376	0.14756	0.45651	0.26624	0.26599	0.24697												273.6	0.303846	0.32841	0.249559	0.343221	0.153549	0.469052	0.262261	0.275411	0.242517
275.7	-0.6609	-0.739	-8.5555	-7.153	1.6613	-2.8951	0.7732	-0.5082	-0.5775		275.7	0.27711	0.33854	0.23199	0.34585	0.12149	0.47151	0.27497	0.21002	0.23712												275.7	0.256126	0.3607	0.218389	0.345311	0.127479	0.484052	0.270991	0.219441	0.232667
277.8	-0.7128	-0.7964	-8.5517	-7.1612	1.6786	-2.8927	0.7756	-0.498	-0.5407		277.8	0.2251	0.27974	0.23611	0.33743	0.13862	0.47302	0.2774	0.22025	0.27387												277.8	0.204116	0.3019	0.222509	0.336891	0.144609	0.485562	0.273421	0.229671	0.269417
279.9	-0.7044	-0.7647	-8.5618	-7.1647	1.6761	-2.9036	0.7632	-0.4445	-0.5357		279.9	0.23338	0.31003	0.22634	0.33372	0.13595	0.46122	0.26504	0.27379	0.27881												279.9	0.212396	0.33219	0.212739	0.333181	0.141939	0.473762	0.261061	0.283211	0.274357
282	-0.6916	-0.7608	-8.5706	-7.167	1.7032	-2.8914	0.7309	-0.3961	-0.5419		282	0.24606	0.31252	0.21787	0.33121	0.16288	0.47252	0.23277	0.32222	0.27256												282	0.225076	0.33468	0.204269	0.330671	0.168869	0.485062	0.228791	0.331641	0.268107
284.1	-0.7383	-0.8044	-8.5869	-7.1484	1.7403	-2.8756	0.752	-0.4229	-0.5542		284.1	0.19925	0.26752	0.20189	0.34959	0.19981	0.48742	0.25391	0.29546	0.26021												284.1	0.178266	0.28968	0.188289	0.349051	0.205799	0.499962	0.249931	0.304881	0.255757
286.2	-0.751	-0.7271	-8.5429	-7.1542	1.7143	-2.8744	0.7595	-0.4853	-0.5738		286.2	0.18643	0.34341	0.24622	0.34358	0.17363	0.48772	0.26144	0.23309	0.24056												286.2	0.165446	0.36557	0.232619	0.343041	0.179619	0.500262	0.257461	0.242511	0.236107
288.3	-0.7383	-0.7588	-8.5706	-7.1588	1.6749	-2.8744	0.7495	-0.4623	-0.5579		288.3	0.19902	0.3103	0.21885	0.33877	0.13406	0.48682	0.25147	0.25612	0.2564												288.3	0.178036	0.33246	0.205249	0.338231	0.140049	0.499362	0.247491	0.265541	0.251947
290.4	-0.716	-0.7588	-8.602	-7.1437	1.6699	-2.8707	0.7669	-0.4407	-0.5702		290.4	0.2212	0.3089	0.18777	0.35365	0.12889	0.48962	0.26891	0.27776	0.24405												290.4	0.200216	0.33106	0.174169	0.353111	0.134879	0.502162	0.264931	0.287181	0.239597
292.5	-0.6885	-0.7925	-8.5869	-7.1414	1.7069	-2.8732	0.752	-0.377	-0.5677		292.5	0.24859	0.27379	0.2032	0.35574	0.16572	0.48622	0.25404	0.34149	0.2465												292.5	0.227606	0.29595	0.189599	0.355201	0.171709	0.498762	0.250061	0.350911	0.242047
294.6	-0.6397	-0.7588	-8.5945	-7.1495	1.7205	-2.8622	0.7607	-0.4012	-0.5382		294.6	0.29727	0.30608	0.19593	0.34742	0.17915	0.49632	0.26277	0.31732	0.27595												294.6	0.276286	0.32824	0.182329	0.346881	0.185139	0.508862	0.258791	0.326741	0.271497
296.7	-0.6747	-0.737	-8.5756	-7.1344	1.7329	-2.85	0.7558	-0.456	-0.5517		296.7	0.26215	0.32648	0.21515	0.36231	0.19138	0.50762	0.25791	0.26256	0.26239												296.7	0.241166	0.34864	0.201549	0.361771	0.197369	0.520162	0.253931	0.271981	0.257937
298.8	-0.6906	-0.6677	-8.5505	-7.146	1.6711	-2.8695	0.7694	-0.4802	-0.5603		298.8	0.24614	0.39437	0.24058	0.3505	0.12941	0.48723	0.27154	0.23839	0.25374												298.8	0.225156	0.41653	0.226979	0.349961	0.135399	0.499772	0.267561	0.247811	0.249287
300.9	-0.6578	-0.7311	-8.5542	-7.1693	1.6909	-2.8561	0.7645	-0.4127	-0.5198		300.9	0.27882	0.32956	0.23721	0.32698	0.14903	0.49973	0.26667	0.30593	0.29419												300.9	0.257836	0.35172	0.223609	0.326441	0.155019	0.512272	0.262691	0.315351	0.289737
303	-0.6662	-0.7231	-8.5605	-7.1449	1.7218	-2.8659	0.757	-0.4203	-0.5505		303	0.27031	0.33616	0.23123	0.35117	0.17976	0.48903	0.25921	0.29836	0.26343												303	0.249326	0.35832	0.217629	0.350631	0.185749	0.501572	0.255231	0.307781	0.258977
305.1	-0.7298	-0.6914	-8.5492	-7.1437	1.7045	-2.8695	0.7495	-0.4407	-0.5161		305.1	0.20659	0.36645	0.24286	0.35216	0.16229	0.48453	0.25174	0.27799	0.29778												305.1	0.185606	0.38861	0.229259	0.351621	0.168279	0.497072	0.247761	0.287411	0.293327
307.2	-0.7308	-0.6994	-8.5882	-7.1647	1.6724	-2.8451	0.7719	-0.4904	-0.5259		307.2	0.20548	0.35704	0.20419	0.33094	0.13002	0.50803	0.27418	0.22833	0.28793												307.2	0.184496	0.3792	0.190589	0.330401	0.136009	0.520572	0.270201	0.237751	0.283477
309.3	-0.7213	-0.741	-8.5517	-7.1414	1.6489	-2.8622	0.7607	-0.4407	-0.5075		309.3	0.21486	0.31404	0.24101	0.35403	0.10635	0.49003	0.26301	0.27806	0.30628												309.3	0.193876	0.3362	0.227409	0.353491	0.112339	0.502572	0.259031	0.287481	0.301827
311.4	-0.6789	-0.7628	-8.5467	-7.1681	1.6847	-2.8744	0.7744	-0.4318	-0.5296		311.4	0.25714	0.29083	0.24634	0.32711	0.14198	0.47693	0.27674	0.28699	0.28412												311.4	0.236156	0.31299	0.232739	0.326571	0.147969	0.489472	0.272761	0.296411	0.279667
313.5	-0.6874	-0.7647	-8.553	-7.1635	1.6823	-2.8573	0.7669	-0.4445	-0.5136		313.5	0.24853	0.28752	0.24037	0.3315	0.1394	0.49313	0.26928	0.27433	0.30007												313.5	0.227546	0.30968	0.226769	0.330961	0.145389	0.505672	0.265301	0.283751	0.295617
315.6	-0.698	-0.7588	-8.553	-7.1519	1.6613	-2.811	0.7694	-0.4674	-0.5149		315.6	0.23781	0.29202	0.24069	0.34289	0.11823	0.53853	0.27181	0.25146	0.29872												315.6	0.216826	0.31418	0.227089	0.342351	0.124219	0.551072	0.267831	0.260881	0.294267
317.7	-0.698	-0.739	-8.5253	-7.1332	1.6317	-2.8207	0.7632	-0.4496	-0.5284		317.7	0.2377	0.31041	0.26872	0.36137	0.08846	0.52794	0.26564	0.26929	0.28517												317.7	0.216716	0.33257	0.255119	0.360831	0.0944489	0.540482	0.261661	0.278711	0.280717
319.8	-0.6991	-0.7885	-8.5681	-7.1612	1.6279	-2.8159	0.762	-0.391	-0.5443		319.8	0.23648	0.2595	0.22625	0.33316	0.08449	0.53184	0.26448	0.32793	0.26921												319.8	0.215496	0.28166	0.212649	0.332621	0.0904789	0.544382	0.260501	0.337351	0.264757
321.9	-0.6578	-0.7925	-8.5643	-7.1321	1.6613	-2.8305	0.757	-0.3936	-0.5259		321.9	0.27767	0.2541	0.23037	0.36205	0.11772	0.51634	0.25951	0.32536	0.28756												321.9	0.256686	0.27626	0.216769	0.361511	0.123709	0.528882	0.255531	0.334781	0.283107
324	-0.6069	-0.7865	-8.558	-7.1111	1.6502	-2.8244	0.7346	-0.4458	-0.5259		324	0.32845	0.25869	0.237	0.38283	0.10645	0.52154	0.23714	0.2732	0.28751												324	0.307466	0.28085	0.223399	0.382291	0.112439	0.534082	0.233161	0.282621	0.283057
326.1	-0.6758	-0.7093	-8.5681	-7.1251	1.6786	-2.8159	0.7558	-0.4585	-0.5517		326.1	0.25943	0.33448	0.22723	0.36862	0.13468	0.52914	0.25838	0.26053	0.26166												326.1	0.238446	0.35664	0.213629	0.368081	0.140669	0.541682	0.254401	0.269951	0.257207
328.2	-0.6323	-0.6895	-8.5681	-7.1367	1.6786	-2.8451	0.7744	-0.4662	-0.5591		328.2	0.30282	0.35288	0.22755	0.35681	0.1345	0.49904	0.27701	0.25286	0.2542												328.2	0.281836	0.37504	0.213949	0.356271	0.140489	0.511582	0.273031	0.262281	0.249747
330.3	-0.6355	-0.7647	-8.5681	-7.1379	1.6724	-2.8707	0.8067	-0.4318	-0.5726		330.3	0.2995	0.27627	0.22788	0.35539	0.12813	0.47254	0.30935	0.2873	0.24065												330.3	0.278516	0.29843	0.214279	0.354851	0.134119	0.485082	0.305371	0.296721	0.236197
332.4	-0.6588	-0.8103	-8.5391	-7.1298	1.66	-2.8354	0.7558	-0.4127	-0.5775		332.4	0.27609	0.22926	0.25721	0.36328	0.11556	0.50694	0.25848	0.30643	0.2357												332.4	0.255106	0.25142	0.243609	0.362741	0.121549	0.519482	0.254501	0.315851	0.231247
334.5	-0.7287	-0.8044	-8.5391	-7.1495	1.6749	-2.8451	0.7359	-0.442	-0.5665		334.5	0.20607	0.23375	0.25753	0.34336	0.13029	0.49634	0.23861	0.27716	0.24665												334.5	0.185086	0.25591	0.243929	0.342821	0.136279	0.508882	0.234631	0.286581	0.242197
336.6	-0.7531	-0.7608	-8.5605	-7.1612	1.6674	-2.8573	0.7458	-0.4802	-0.5603		336.6	0.18156	0.27595	0.23646	0.33145	0.12262	0.48325	0.24855	0.239	0.25279												336.6	0.160576	0.29811	0.222859	0.330911	0.128609	0.495792	0.244571	0.248421	0.248337
338.7	-0.7404	-0.7766	-8.5655	-7.1577	1.6415	-2.8378	0.7732	-0.4471	-0.5702		338.7	0.19414	0.25874	0.23179	0.33474	0.09655	0.50185	0.27598	0.27213	0.24284												338.7	0.173156	0.2809	0.218189	0.334201	0.102539	0.514392	0.272001	0.281551	0.238387
340.8	-0.6864	-0.8499	-8.5806	-7.1693	1.6563	-2.839	0.757	-0.3834	-0.5284		340.8	0.24802	0.18403	0.21702	0.32292	0.11118	0.49975	0.25981	0.33586	0.28459												340.8	0.227036	0.20619	0.203419	0.322381	0.117169	0.512292	0.255831	0.345281	0.280137
342.9	-0.6715	-0.7826	-8.5555	-7.1542	1.681	-2.8585	0.7446	-0.4076	-0.5517		342.9	0.26281	0.24993	0.24244	0.33781	0.1357	0.47935	0.24745	0.3117	0.26124												342.9	0.241826	0.27209	0.228839	0.337271	0.141689	0.491892	0.243471	0.321121	0.256787
345	-0.6747	-0.8321	-8.5668	-7.1356	1.6613	-2.8232	0.7334	-0.47	-0.5554		345	0.25949	0.19902	0.23147	0.3562	0.11583	0.51375	0.23628	0.24933	0.25748												345	0.238506	0.22118	0.217869	0.355661	0.121819	0.526292	0.232301	0.258751	0.253027
347.1	-0.6927	-0.8004	-8.5404	-7.1298	1.6329	-2.8439	0.7334	-0.4955	-0.548		347.1	0.24138	0.22931	0.2582	0.36178	0.08726	0.49215	0.23631	0.22387	0.26483												347.1	0.220396	0.25147	0.244599	0.361241	0.0932489	0.504692	0.232331	0.233291	0.260377
349.2	-0.7054	-0.7984	-8.5416	-7.16	1.6403	-2.8573	0.716	-0.4432	-0.548		349.2	0.22856	0.22991	0.25732	0.33137	0.09449	0.47785	0.21895	0.2762	0.26478												349.2	0.207576	0.25207	0.243719	0.330831	0.100479	0.490392	0.214971	0.285621	0.260327
351.3	-0.6472	-0.8499	-8.5492	-7.1274	1.6625	-2.8524	0.7122	-0.377	-0.5566		351.3	0.28665	0.177	0.25005	0.36376	0.11652	0.48185	0.21518	0.34243	0.25612												351.3	0.265666	0.19916	0.236449	0.363221	0.122509	0.494392	0.211201	0.351851	0.251667
353.4	-0.6641	-0.8202	-8.5266	-7.1146	1.66	-2.839	0.6924	-0.4088	-0.5603		353.4	0.26963	0.20529	0.27298	0.37634	0.11385	0.49435	0.19542	0.31067	0.25237												353.4	0.248646	0.22745	0.259379	0.375801	0.119839	0.506892	0.191441	0.320091	0.247917
355.5	-0.6599	-0.7727	-8.5391	-7.1495	1.6563	-2.8183	0.711	-0.4254	-0.5357		355.5	0.27371	0.25139	0.2608	0.34123	0.10997	0.51416	0.21405	0.2941	0.27692												355.5	0.252726	0.27355	0.247199	0.340691	0.115959	0.526702	0.210071	0.303521	0.272467
357.6	-0.6578	-0.7806	-8.5303	-7.146	1.665	-2.8025	0.7346	-0.442	-0.5382		357.6	0.2757	0.24208	0.26993	0.34451	0.1185	0.52906	0.23768	0.27753	0.27437												357.6	0.254716	0.26424	0.256329	0.343971	0.124489	0.541602	0.233701	0.286951	0.269917
359.7	-0.6239	-0.8559	-8.5505	-7.1681	1.6749	-2.8073	0.7483	-0.3948	-0.5431		359.7	0.30948	0.16537	0.25006	0.3222	0.12823	0.52336	0.25142	0.32477	0.26941												359.7	0.288496	0.18753	0.236459	0.321661	0.134219	0.535902	0.247441	0.334191	0.264957
361.8	-0.5773	-0.846	-8.5769	-7.1716	1.6835	-2.8122	0.7222	-0.4088	-0.5616		361.8	0.35597	0.17387	0.22398	0.31849	0.13666	0.51756	0.22535	0.3108	0.25086												361.8	0.334986	0.19603	0.210379	0.317951	0.142649	0.530102	0.221371	0.320221	0.246407
363.9	-0.6101	-0.848	-8.5379	-7.1763	1.6921	-2.7964	0.7122	-0.4178	-0.5726		363.9	0.32305	0.17046	0.26331	0.31357	0.14509	0.53246	0.21538	0.30184	0.23981												363.9	0.302066	0.19262	0.249709	0.313031	0.151079	0.545002	0.211401	0.311261	0.235357
366	-0.6599	-0.7865	-8.5303	-7.1565	1.7008	-2.8049	0.7359	-0.4662	-0.5505		366	0.27313	0.23055	0.27124	0.33316	0.15362	0.52306	0.23912	0.25347	0.26186												366	0.252146	0.25271	0.257639	0.332621	0.159609	0.535602	0.235141	0.262891	0.257407
368.1	-0.7245	-0.7667	-8.5278	-7.16	1.6452	-2.8037	0.7508	-0.4865	-0.5702		368.1	0.20842	0.24895	0.27406	0.32945	0.09785	0.52336	0.25405	0.2332	0.2421												368.1	0.187436	0.27111	0.260459	0.328911	0.103839	0.535902	0.250071	0.242621	0.237647
370.2	-0.7118	-0.8242	-8.5303	-7.1798	1.6415	-2.7793	0.762	-0.4241	-0.5628		370.2	0.221	0.19004	0.27189	0.30943	0.09397	0.54686	0.26528	0.29564	0.24945												370.2	0.200016	0.2122	0.258289	0.308891	0.0999589	0.559402	0.261301	0.305061	0.244997
372.3	-0.7245	-0.8816	-8.5316	-7.1728	1.7057	-2.7939	0.7309	-0.3732	-0.5763		372.3	0.20819	0.13123	0.27092	0.31622	0.158	0.53136	0.23422	0.34657	0.2359												372.3	0.187206	0.15339	0.257319	0.315681	0.163989	0.543902	0.230241	0.355991	0.231447
374.4	-0.6821	-0.846	-8.5366	-7.146	1.7032	-2.7915	0.7408	-0.4012	-0.5603		374.4	0.25047	0.16543	0.26624	0.34281	0.15533	0.53287	0.24415	0.3186	0.25185												374.4	0.229486	0.18759	0.252639	0.342271	0.161319	0.545412	0.240171	0.328021	0.247397
376.5	-0.6811	-0.8044	-8.5266	-7.1658	1.665	-2.7683	0.7595	-0.4471	-0.5431		376.5	0.25136	0.20562	0.27657	0.32279	0.11696	0.55517	0.26289	0.27274	0.26899												376.5	0.230376	0.22778	0.262969	0.322251	0.122949	0.567712	0.258911	0.282161	0.264537
378.6	-0.6747	-0.8163	-8.5316	-7.1437	1.6403	-2.7549	0.7558	-0.4381	-0.5468		378.6	0.25764	0.19231	0.2719	0.34468	0.09209	0.56767	0.25922	0.28177	0.26524												378.6	0.236656	0.21447	0.258299	0.344141	0.0980789	0.580212	0.255241	0.291191	0.260787
380.7	-0.6556	-0.8559	-8.5693	-7.1321	1.6613	-2.7756	0.7533	-0.3961	-0.564		380.7	0.27662	0.15131	0.23452	0.35606	0.11292	0.54607	0.25675	0.3238	0.24799												380.7	0.255636	0.17347	0.220919	0.355521	0.118909	0.558612	0.252771	0.333221	0.243537
382.8	-0.6408	-0.9252	-8.6058	-7.1472	1.6946	-2.7793	0.7297	-0.4025	-0.596		382.8	0.29131	0.0806	0.19835	0.34075	0.14604	0.54147	0.23319	0.31744	0.21594												382.8	0.270326	0.10276	0.184749	0.340211	0.152029	0.554012	0.229211	0.326861	0.211487
384.9	-0.7065	-0.8598	-8.5655	-7.1484	1.702	-2.7903	0.7359	-0.4381	-0.5923		384.9	0.22549	0.14459	0.23898	0.33934	0.15327	0.52957	0.23942	0.28187	0.21958												384.9	0.204506	0.16675	0.225379	0.338801	0.159259	0.542112	0.235441	0.291291	0.215127
387	-0.7552	-0.8539	-8.592	-7.1356	1.6563	-2.7817	0.7495	-0.442	-0.5542		387	0.17668	0.14908	0.2128	0.35192	0.1074	0.53727	0.25305	0.27801	0.25763												387	0.155696	0.17124	0.199199	0.351381	0.113389	0.549812	0.249071	0.287431	0.253177
389.1	-0.734	-0.8281	-8.5932	-7.1507	1.6526	-2.7939	0.7433	-0.4267	-0.5345		389.1	0.19776	0.17348	0.21193	0.33661	0.10353	0.52417	0.24689	0.29334	0.27728												389.1	0.176776	0.19564	0.198329	0.336071	0.109519	0.536712	0.242911	0.302761	0.272827
391.2	-0.6991	-0.8559	-8.5831	-7.1484	1.6526	-2.7696	0.7321	-0.4012	-0.5394		391.2	0.23255	0.14427	0.22236	0.3387	0.10336	0.54757	0.23572	0.31887	0.27233												391.2	0.211566	0.16643	0.208759	0.338161	0.109349	0.560112	0.231741	0.328291	0.267877
393.3	-0.6164	-0.8658	-8.5706	-7.167	1.6909	-2.7927	0.7209	-0.3872	-0.553		393.3	0.31513	0.13296	0.23518	0.31988	0.14149	0.52358	0.22455	0.33291	0.25867												393.3	0.294146	0.15512	0.221579	0.319341	0.147479	0.536122	0.220571	0.342331	0.254217
395.4	-0.6111	-0.8123	-8.5731	-7.1612	1.6514	-2.7988	0.711	-0.405	-0.5665		395.4	0.32031	0.18506	0.23301	0.32547	0.10182	0.51658	0.21469	0.31514	0.24512												395.4	0.299326	0.20722	0.219409	0.324931	0.107809	0.529122	0.210711	0.324561	0.240667
397.5	-0.6101	-0.7885	-8.5781	-7.1332	1.6279	-2.7488	0.752	-0.4471	-0.5493		397.5	0.3212	0.20745	0.22834	0.35326	0.07814	0.56568	0.25572	0.27307	0.26227												397.5	0.300216	0.22961	0.214739	0.352721	0.0841289	0.578222	0.251741	0.282491	0.257817
399.6	-0.6111	-0.7727	-8.5806	-7.1577	1.6576	-2.7769	0.7185	-0.4203	-0.537		399.6	0.32008	0.22184	0.22616	0.32854	0.10767	0.53668	0.22226	0.29991	0.27451												399.6	0.299096	0.244	0.212559	0.328001	0.113659	0.549222	0.218281	0.309331	0.270057
401.7	-0.6397	-0.8539	-8.5278	-7.1635	1.6773	-2.783	0.7471	-0.4152	-0.5554		401.7	0.29137	0.13924	0.27929	0.32253	0.1272	0.52968	0.25089	0.30504	0.25606												401.7	0.270386	0.1614	0.265689	0.321991	0.133189	0.542222	0.246911	0.314461	0.251607
403.8	-0.6683	-0.7846	-8.5693	-7.1402	1.686	-2.8	0.7309	-0.4101	-0.5456		403.8	0.26265	0.20713	0.23812	0.34561	0.13573	0.51178	0.23472	0.31017	0.26581												403.8	0.241666	0.22929	0.224519	0.345071	0.141719	0.524322	0.230741	0.319591	0.261357
405.9	-0.6938	-0.8202	-8.5391	-7.1321	1.6872	-2.7696	0.7384	-0.4407	-0.5579		405.9	0.23704	0.17012	0.26864	0.3535	0.13676	0.54128	0.24226	0.27961	0.25346												405.9	0.216056	0.19228	0.255039	0.352961	0.142749	0.553822	0.238281	0.289031	0.249007
408	-0.7171	-0.8004	-8.5366	-7.1158	1.6477	-2.7781	0.7234	-0.4458	-0.5775		408	0.21362	0.18852	0.27147	0.36959	0.09709	0.53188	0.22729	0.27454	0.2338												408	0.192636	0.21068	0.257869	0.369051	0.103079	0.544422	0.223311	0.283961	0.229347
410.1	-0.6588	-0.7925	-8.5794	-7.1251	1.6687	-2.7647	0.7259	-0.4203	-0.5702		410.1	0.2718	0.19501	0.229	0.36007	0.11792	0.54438	0.22982	0.30008	0.24105												410.1	0.250816	0.21717	0.215399	0.359531	0.123909	0.556922	0.225841	0.309501	0.236597
412.2	-0.5889	-0.8242	-8.5743	-7.1565	1.6687	-2.7805	0.7297	-0.3796	-0.5689		412.2	0.34159	0.1619	0.23443	0.32846	0.11774	0.52769	0.23366	0.34081	0.2423												412.2	0.320606	0.18406	0.220829	0.327921	0.123729	0.540232	0.229681	0.350231	0.237847
414.3	-0.5688	-0.8598	-8.5731	-7.1146	1.6897	-2.7805	0.7371	-0.3796	-0.5628		414.3	0.36157	0.1249	0.23595	0.37015	0.13857	0.52679	0.24109	0.34084	0.24835												414.3	0.340586	0.14706	0.222349	0.369611	0.144559	0.539332	0.237111	0.350261	0.243897
416.4	-0.6525	-0.8024	-8.5743	-7.1158	1.6921	-2.7842	0.7495	-0.4165	-0.5173		416.4	0.27776	0.18089	0.23508	0.36873	0.1408	0.52219	0.25352	0.30398	0.29379												416.4	0.256776	0.20305	0.221479	0.368191	0.146789	0.534732	0.249541	0.313401	0.289337
418.5	-0.7097	-0.7846	-8.5454	-7.1239	1.6539	-2.7696	0.7384	-0.4381	-0.5431		418.5	0.22044	0.19728	0.26431	0.36042	0.10243	0.53589	0.24246	0.28241	0.26794												418.5	0.199456	0.21944	0.250709	0.359881	0.108419	0.548432	0.238481	0.291831	0.263487
420.6	-0.733	-0.8262	-8.5718	-7.1007	1.6551	-2.7525	0.7346	-0.4114	-0.5235		420.6	0.19703	0.15428	0.23823	0.3834	0.10346	0.55209	0.23869	0.30914	0.28749												420.6	0.176046	0.17644	0.224629	0.382861	0.109449	0.564632	0.234711	0.318561	0.283037
422.7	-0.7022	-0.9034	-8.5706	-7.11	1.7131	-2.7854	0.7147	-0.4152	-0.5456		422.7	0.22771	0.07567	0.23976	0.37389	0.16129	0.51829	0.21883	0.30538	0.26534												422.7	0.206726	0.0978297	0.226159	0.373351	0.167279	0.530832	0.214851	0.314801	0.260887
424.8	-0.7393	-0.8678	-8.5567	-7.0914	1.7255	-2.7598	0.7284	-0.4127	-0.5456		424.8	0.19049	0.10986	0.25399	0.39228	0.17351	0.54299	0.23256	0.30791	0.26528												424.8	0.169506	0.13202	0.240389	0.391741	0.179499	0.555532	0.228581	0.317331	0.260827
426.9	-0.7234	-0.7786	-8.5567	-7.0879	1.6884	-2.7488	0.757	-0.4241	-0.4977		426.9	0.20628	0.19766	0.25431	0.39556	0.13624	0.55309	0.26119	0.29655	0.31313												426.9	0.185296	0.21982	0.240709	0.395021	0.142229	0.565632	0.257211	0.305971	0.308677
429	-0.7245	-0.7945	-8.5505	-7.0925	1.6971	-2.7683	0.757	-0.456	-0.5136		429	0.20506	0.18035	0.26084	0.39075	0.14477	0.53269	0.26123	0.26468	0.29718												429	0.184076	0.20251	0.247239	0.390211	0.150759	0.545232	0.257251	0.274101	0.292727
431.1	-0.6143	-0.8539	-8.5781	-7.1204	1.6897	-2.7647	0.7669	-0.4038	-0.5419		431.1	0.31515	0.11954	0.23357	0.36264	0.1372	0.5354	0.27116	0.31691	0.26883												431.1	0.294166	0.1417	0.219969	0.362101	0.143189	0.547942	0.267181	0.326331	0.264377
433.2	-0.5667	-0.9114	-8.5668	-7.1007	1.7032	-2.7659	0.7831	-0.4038	-0.5628		433.2	0.36263	0.06064	0.24519	0.38212	0.15053	0.5333	0.28739	0.31695	0.24787												433.2	0.341646	0.0827997	0.231589	0.381581	0.156519	0.545842	0.283411	0.326371	0.243417
435.3	-0.573	-0.8044	-8.5731	-7.1123	1.6625	-2.7732	0.7334	-0.4343	-0.5566		435.3	0.35622	0.16623	0.23922	0.37031	0.10966	0.5251	0.23773	0.28648	0.25402												435.3	0.335236	0.18839	0.225619	0.369771	0.115649	0.537642	0.233751	0.295901	0.249567
437.4	-0.6196	-0.7925	-8.5706	-7.096	1.607	-2.7598	0.7458	-0.4751	-0.5357		437.4	0.3095	0.17672	0.24205	0.3864	0.05399	0.5376	0.25016	0.24571	0.27487												437.4	0.288516	0.19888	0.228449	0.385861	0.0599789	0.550142	0.246181	0.255131	0.270417
439.5	-0.6207	-0.7945	-8.5907	-7.1007	1.586	-2.7635	0.7607	-0.4534	-0.5136		439.5	0.30828	0.17331	0.22227	0.38148	0.03281	0.533	0.26509	0.26745	0.29692												439.5	0.287296	0.19547	0.208669	0.380941	0.0387989	0.545542	0.261111	0.276871	0.292467
441.6	-0.6387	-0.9074	-8.5806	-7.1065	1.6317	-2.7817	0.7321	-0.4216	-0.5222		441.6	0.29017	0.05901	0.2327	0.37547	0.07834	0.5139	0.23653	0.29928	0.28826												441.6	0.269186	0.0811697	0.219099	0.374931	0.0843289	0.526442	0.232551	0.308701	0.283807
443.7	-0.6683	-0.8182	-8.5781	-7.1042	1.6341	-2.7842	0.7408	-0.3796	-0.5284		443.7	0.26045	0.1468	0.23553	0.37755	0.08057	0.5105	0.24526	0.34131	0.28201												443.7	0.239466	0.16896	0.221929	0.377011	0.0865589	0.523042	0.241281	0.350731	0.277557
445.8	-0.6821	-0.8143	-8.5718	-7.1088	1.6526	-2.783	0.7209	-0.4254	-0.537		445.8	0.24654	0.14929	0.24215	0.37274	0.0989	0.5108	0.2254	0.29555	0.27336												445.8	0.225556	0.17145	0.228549	0.372201	0.104889	0.523342	0.221421	0.304971	0.268907
447.9	-0.7054	-0.7667	-8.5769	-7.0925	1.6786	-2.7659	0.7098	-0.4267	-0.5616		447.9	0.22312	0.19549	0.23738	0.38883	0.12473	0.527	0.21433	0.29428	0.2487												447.9	0.202136	0.21765	0.223779	0.388291	0.130719	0.539542	0.210351	0.303701	0.244247
450	-0.7139	-0.737	-8.5505	-7.096	1.6131	-2.8073	0.7334	-0.3923	-0.5542		450	0.21451	0.22378	0.26411	0.38511	0.05906	0.48471	0.23796	0.32872	0.25605												450	0.193526	0.24594	0.250509	0.384571	0.0650489	0.497252	0.233981	0.338141	0.251597
452.1	-0.6652	-0.8301	-8.5505	-7.089	1.665	-2.8256	0.7421	-0.3541	-0.5468		452.1	0.26309	0.12927	0.26443	0.3919	0.11078	0.46551	0.2467	0.36695	0.2634												452.1	0.242106	0.15143	0.250829	0.391361	0.116769	0.478052	0.242721	0.376371	0.258947
454.2	-0.644	-0.8083	-8.5492	-7.0949	1.6699	-2.8025	0.7421	-0.4152	-0.5407		454.2	0.28417	0.14967	0.26606	0.38579	0.11551	0.48771	0.24673	0.30588	0.26945												454.2	0.263186	0.17183	0.252459	0.385251	0.121499	0.500252	0.242751	0.315301	0.264997
456.3	-0.6853	-0.7449	-8.6058	-7.0914	1.5946	-2.7635	0.7545	-0.4318	-0.5542		456.3	0.24276	0.21166	0.20979	0.38907	0.04004	0.52581	0.25916	0.28932	0.25589												456.3	0.221776	0.23382	0.196189	0.388531	0.0460289	0.538352	0.255181	0.298741	0.251437
458.4	-0.663	-0.7449	-8.5945	-7.0716	1.5773	-2.7561	0.7756	-0.442	-0.5333		458.4	0.26494	0.21025	0.22141	0.40866	0.02257	0.53231	0.2803	0.27915	0.27674												458.4	0.243956	0.23241	0.207809	0.408121	0.0285589	0.544852	0.276321	0.288571	0.272287
460.5	-0.6567	-0.8242	-8.6045	-7.0797	1.607	-2.75	0.7645	-0.4127	-0.5505		460.5	0.27113	0.12955	0.21174	0.40035	0.0521	0.53751	0.26923	0.30848	0.25949												460.5	0.250146	0.15171	0.198139	0.399811	0.0580889	0.550052	0.265251	0.317901	0.255037
462.6	-0.6313	-0.7925	-8.5957	-7.0821	1.6156	-2.744	0.7458	-0.4203	-0.5456		462.6	0.29641	0.15984	0.22087	0.39773	0.06053	0.54261	0.25056	0.30092	0.26434												462.6	0.275426	0.182	0.207269	0.397191	0.0665189	0.555152	0.246581	0.310341	0.259887
464.7	-0.6207	-0.8163	-8.5693	-7.0762	1.6465	-2.7476	0.7433	-0.428	-0.5419		464.7	0.3069	0.13463	0.24759	0.40342	0.09126	0.53811	0.2481	0.29325	0.26798												464.7	0.285916	0.15679	0.233989	0.402881	0.0972489	0.550652	0.244121	0.302671	0.263527
466.8	-0.6493	-0.7806	-8.6171	-7.0797	1.6255	-2.7342	0.7595	-0.4674	-0.5382		466.8	0.27818	0.16893	0.20012	0.3997	0.07008	0.55061	0.26433	0.25388	0.27163												466.8	0.257196	0.19109	0.186519	0.399161	0.0760689	0.563152	0.260351	0.263301	0.267177
468.9	-0.6175	-0.8024	-8.641	-7.0693	1.5885	-2.722	0.7582	-0.4623	-0.5333		468.9	0.30986	0.14572	0.17655	0.40989	0.03291	0.56191	0.26307	0.25902	0.27648												468.9	0.288876	0.16788	0.162949	0.409351	0.0388989	0.574452	0.259091	0.268441	0.272027
471	-0.5836	-0.8618	-8.6674	-7.0704	1.6193	-2.7318	0.7346	-0.4038	-0.5112		471	0.34365	0.08491	0.15047	0.40858	0.06354	0.55122	0.2395	0.31755	0.29853												471	0.322666	0.10707	0.136869	0.408041	0.0695289	0.563762	0.235521	0.326971	0.294077
473.1	-0.554	-0.8598	-8.6259	-7.1146	1.6403	-2.7281	0.7483	-0.4012	-0.5308		473.1	0.37313	0.08551	0.1923	0.36416	0.08437	0.55402	0.25323	0.32019	0.27887												473.1	0.352146	0.10767	0.178699	0.363621	0.0903589	0.566562	0.249251	0.329611	0.274417
475.2	-0.627	-0.7964	-8.6171	-7.0762	1.6317	-2.7244	0.7458	-0.433	-0.5345		475.2	0.30002	0.1475	0.20143	0.40235	0.0756	0.55682	0.25077	0.28842	0.27512												475.2	0.279036	0.16966	0.187829	0.401811	0.0815889	0.569362	0.246791	0.297841	0.270667
477.3	-0.6789	-0.7509	-8.6209	-7.0797	1.5996	-2.7232	0.7483	-0.4394	-0.5271		477.3	0.248	0.19159	0.19795	0.39864	0.04333	0.55712	0.2533	0.28205	0.28247												477.3	0.227016	0.21375	0.184349	0.398101	0.0493189	0.569662	0.249321	0.291471	0.278017
479.4	-0.7075	-0.7311	-8.6372	-7.117	1.6144	-2.7513	0.7495	-0.4063	-0.5677		479.4	0.21929	0.20999	0.18198	0.36112	0.05796	0.52812	0.25453	0.31519	0.24182												479.4	0.198306	0.23215	0.168379	0.360581	0.0639489	0.540662	0.250551	0.324611	0.237367
481.5	-0.6789	-0.8064	-8.6096	-7.1321	1.6317	-2.7696	0.7508	-0.4076	-0.5628		481.5	0.24777	0.13328	0.20991	0.34581	0.07508	0.50892	0.25587	0.31392	0.24666												481.5	0.226786	0.15544	0.196309	0.345271	0.0810689	0.521462	0.251891	0.323341	0.242207
483.6	-0.7181	-0.8143	-8.5995	-7.0949	1.6465	-2.7537	0.7657	-0.3732	-0.5566		483.6	0.20845	0.12397	0.22034	0.3828	0.08971	0.52392	0.2708	0.34835	0.25281												483.6	0.187466	0.14613	0.206739	0.382261	0.0956989	0.536462	0.266821	0.357771	0.248357
485.7	-0.6228	-0.7568	-8.5794	-7.0634	1.6403	-2.7354	0.7794	-0.4305	-0.548		485.7	0.30364	0.18007	0.24076	0.41408	0.08334	0.54132	0.28453	0.29109	0.26136												485.7	0.282656	0.20223	0.227159	0.413541	0.0893289	0.553862	0.280551	0.300511	0.256907
487.8	-0.6059	-0.7826	-8.592	-7.0658	1.6218	-2.7354	0.7819	-0.4076	-0.5173		487.8	0.32042	0.15286	0.22849	0.41147	0.06467	0.54042	0.28707	0.31402	0.29201												487.8	0.299436	0.17502	0.214889	0.410931	0.0706589	0.552962	0.283091	0.323441	0.287557
489.9	-0.555	-0.7667	-8.5957	-7.1158	1.6428	-2.7452	0.7396	-0.3745	-0.5505		489.9	0.37121	0.16735	0.22512	0.36125	0.0855	0.52973	0.2448	0.34716	0.25875												489.9	0.350226	0.18951	0.211519	0.360711	0.0914889	0.542272	0.240821	0.356581	0.254297
492	-0.5042	-0.8044	-8.6284	-7.0855	1.6526	-2.7513	0.757	-0.3617	-0.5419		492	0.42189	0.12825	0.19274	0.39134	0.09513	0.52273	0.26224	0.35999	0.2673												492	0.400906	0.15041	0.179139	0.390801	0.101119	0.535272	0.258261	0.369411	0.262847
494.1	-0.5603	-0.842	-8.6498	-7.117	1.6588	-2.7549	0.7819	-0.4088	-0.5579		494.1	0.36568	0.08924	0.17167	0.35963	0.10115	0.51823	0.28717	0.31292	0.25125												494.1	0.344696	0.1114	0.158069	0.359091	0.107139	0.530772	0.283191	0.322341	0.246797
496.2	-0.6345	-0.7984	-8.641	-7.0925	1.6625	-2.7379	0.7694	-0.4305	-0.5763		496.2	0.29136	0.13143	0.1808	0.38391	0.10468	0.53433	0.2747	0.29126	0.2328												496.2	0.270376	0.15359	0.167199	0.383371	0.110669	0.546872	0.270721	0.300681	0.228347
498.3	-0.6567	-0.7786	-8.6309	-7.1007	1.6094	-2.7464	0.7645	-0.4318	-0.5419		498.3	0.26904	0.14982	0.19122	0.3755	0.05141	0.52493	0.26984	0.28999	0.26714												498.3	0.248056	0.17198	0.177619	0.374961	0.0573989	0.537472	0.265861	0.299411	0.262687
500.4	-0.7012	-0.8281	-8.6133	-7.0983	1.6057	-2.7488	0.7645	-0.3859	-0.5124		500.4	0.22443	0.09892	0.20915	0.37769	0.04754	0.52163	0.26987	0.33592	0.29659												500.4	0.203446	0.12108	0.195549	0.377151	0.0535289	0.534172	0.265891	0.345341	0.292137
502.5	-0.7128	-0.8797	-8.6335	-7.0925	1.6181	-2.7305	0.7806	-0.3974	-0.5136		502.5	0.21271	0.04591	0.18928	0.38327	0.05977	0.53903	0.286	0.32446	0.29534												502.5	0.191726	0.0680697	0.175679	0.382731	0.0657589	0.551572	0.282021	0.333881	0.290887
504.6	-0.7435	-0.8519	-8.6246	-7.1158	1.6218	-2.7379	0.7595	-0.4241	-0.5321		504.6	0.1819	0.0723	0.1985	0.35976	0.0633	0.53073	0.26494	0.29779	0.27678												504.6	0.160916	0.0944597	0.184899	0.359221	0.0692889	0.543272	0.260961	0.307211	0.272327
506.7	-0.751	-0.8361	-8.6448	-7.0925	1.6119	-2.7147	0.7508	-0.4178	-0.4977		506.7	0.17428	0.0867	0.17863	0.38284	0.05323	0.55303	0.25627	0.30412	0.31113												506.7	0.153296	0.10886	0.165029	0.382301	0.0592189	0.565572	0.252291	0.313541	0.306677
508.8	-0.7594	-0.8202	-8.6599	-7.1018	1.5983	-2.7354	0.7433	-0.3999	-0.4964		508.8	0.16577	0.10119	0.16386	0.37333	0.03945	0.53144	0.2488	0.32206	0.31238												508.8	0.144786	0.12335	0.150259	0.372791	0.0454389	0.543982	0.244821	0.331481	0.307927
510.9	-0.7245	-0.7707	-8.6498	-7.1379	1.607	-2.7171	0.7582	-0.3719	-0.5235		510.9	0.20055	0.14928	0.17428	0.33702	0.04798	0.54884	0.26374	0.35009	0.28523												510.9	0.179566	0.17144	0.160679	0.336481	0.0539689	0.561382	0.259761	0.359511	0.280777
513	-0.6916	-0.8757	-8.6737	-7.1053	1.6329	-2.733	0.7321	-0.3974	-0.5136		513	0.23333	0.04288	0.15071	0.3694	0.07371	0.53204	0.23767	0.32463	0.29507												513	0.212346	0.0650397	0.137109	0.368861	0.0796989	0.544582	0.233691	0.334051	0.290617
515.1	-0.7097	-0.7628	-8.6561	-7.0879	1.607	-2.7403	0.7408	-0.4203	-0.5198		515.1	0.21512	0.15437	0.16864	0.38659	0.04764	0.52384	0.24641	0.30176	0.28882												515.1	0.194136	0.17653	0.155039	0.386051	0.0536289	0.536382	0.242431	0.311181	0.284367
517.2	-0.6821	-0.7846	-8.6485	-7.0914	1.586	-2.7549	0.7433	-0.428	-0.521		517.2	0.2426	0.13116	0.17656	0.38288	0.02647	0.50834	0.24894	0.29409	0.28757												517.2	0.221616	0.15332	0.162959	0.382341	0.0324589	0.520882	0.244961	0.303511	0.283117
519.3	-0.5963	-0.7687	-8.6636	-7.1007	1.6033	-2.7671	0.7632	-0.4076	-0.5419		519.3	0.32829	0.14566	0.16179	0.37336	0.0436	0.49524	0.26887	0.31453	0.26662												519.3	0.307306	0.16782	0.148189	0.372821	0.0495889	0.507782	0.264891	0.323951	0.262167
521.4	-0.591	-0.8618	-8.6536	-7.1135	1.5699	-2.7671	0.7582	-0.377	-0.548		521.4	0.33347	0.05115	0.17212	0.36035	0.01002	0.49434	0.26391	0.34516	0.26046												521.4	0.312486	0.0733097	0.158519	0.359811	0.0160089	0.506882	0.259931	0.354581	0.256007
523.5	-0.5497	-0.8301	-8.6448	-7.096	1.644	-2.7464	0.7433	-0.3604	-0.5394		523.5	0.37466	0.08144	0.18124	0.37764	0.08395	0.51414	0.24904	0.36179	0.26901												523.5	0.353676	0.1036	0.167639	0.377101	0.0899389	0.526682	0.245061	0.371211	0.264557
525.6	-0.5603	-0.8024	-8.6347	-7.0867	1.6131	-2.7208	0.7334	-0.4496	-0.5308		525.6	0.36394	0.10774	0.19167	0.38672	0.05288	0.53884	0.23917	0.27263	0.27756												525.6	0.342956	0.1299	0.178069	0.386181	0.0588689	0.551382	0.235191	0.282051	0.273107
527.7	-0.5592	-0.7489	-8.6888	-7.11	1.5551	-2.7208	0.7396	-0.4725	-0.5136		527.7	0.36492	0.15983	0.1379	0.36321	-0.00529	0.53795	0.24541	0.24976	0.29471												527.7	0.343936	0.18199	0.124299	0.362671	0.000698907	0.550492	0.241431	0.259181	0.290257
529.8	-0.6037	-0.7984	-8.6812	-7.1065	1.5675	-2.7159	0.7483	-0.4394	-0.5296		529.8	0.32031	0.10892	0.14582	0.36649	0.00694	0.54195	0.25414	0.2829	0.27865												529.8	0.299326	0.13108	0.132219	0.365951	0.0129289	0.554492	0.250161	0.292321	0.274197
531.9	-0.609	-0.8262	-8.6498	-7.1076	1.5959	-2.7647	0.762	-0.428	-0.5087		531.9	0.31489	0.07972	0.17755	0.36518	0.03517	0.49225	0.26787	0.29433	0.2995												531.9	0.293906	0.10188	0.163949	0.364641	0.0411589	0.504792	0.263891	0.303751	0.295047
534	-0.6599	-0.8242	-8.6561	-7.1123	1.6279	-2.7391	0.7508	-0.4127	-0.5099		534	0.26388	0.08031	0.17158	0.36027	0.067	0.51695	0.25671	0.30966	0.29825												534	0.242896	0.10247	0.157979	0.359731	0.0729889	0.529492	0.252731	0.319081	0.293797
536.1	-0.7319	-0.8281	-8.6561	-7.1053	1.6107	-2.7232	0.7321	-0.4432	-0.5124		536.1	0.19176	0.075	0.1719	0.36705	0.04962	0.53195	0.23804	0.2792	0.2957												536.1	0.170776	0.0971597	0.158299	0.366511	0.0556089	0.544492	0.234061	0.288621	0.291247
538.2	-0.734	-0.7727	-8.6448	-7.0914	1.602	-2.7159	0.7732	-0.4445	-0.5407		538.2	0.18955	0.129	0.18353	0.38074	0.04075	0.53835	0.27918	0.27793	0.26734												538.2	0.168566	0.15116	0.169929	0.380201	0.0467389	0.550892	0.275201	0.287351	0.262887
540.3	-0.7234	-0.7727	-8.6775	-7.1309	1.5453	-2.7025	0.7595	-0.3987	-0.5431		540.3	0.20003	0.12759	0.15116	0.34103	-0.01612	0.55085	0.26551	0.32376	0.26489												540.3	0.179046	0.14975	0.137559	0.340491	-0.0101311	0.563392	0.261531	0.333181	0.260437
542.4	-0.6927	-0.8182	-8.6775	-7.0995	1.5687	-2.7464	0.7396	-0.3936	-0.5407		542.4	0.23061	0.08068	0.15148	0.37221	0.00711	0.50605	0.24564	0.3289	0.26724												542.4	0.209626	0.10284	0.137879	0.371671	0.0130989	0.518592	0.241661	0.338321	0.262787
544.5	-0.6461	-0.7647	-8.6661	-7.1181	1.5983	-2.7135	0.7508	-0.4025	-0.5321		544.5	0.2771	0.13278	0.16321	0.3534	0.03654	0.53805	0.25688	0.32003	0.27579												544.5	0.256116	0.15494	0.149609	0.352861	0.0425289	0.550592	0.252901	0.329451	0.271337
546.6	-0.6535	-0.7311	-8.6599	-7.0949	1.5687	-2.6879	0.7371	-0.4229	-0.5013		546.6	0.26958	0.16497	0.16974	0.37639	0.00677	0.56276	0.24321	0.29966	0.30653												546.6	0.248596	0.18713	0.156139	0.375851	0.0127589	0.575302	0.239231	0.309081	0.302077
548.7	-0.5677	-0.7449	-8.6636	-7.0704	1.528	-2.6611	0.7632	-0.4318	-0.5038		548.7	0.35527	0.14976	0.16636	0.40067	-0.0341	0.58866	0.26934	0.2908	0.30398												548.7	0.334286	0.17192	0.152759	0.400131	-0.0281111	0.601202	0.265361	0.300221	0.299527
550.8	-0.5476	-0.8044	-8.6699	-7.0925	1.5403	-2.6696	0.7297	-0.4025	-0.5149		550.8	0.37525	0.08885	0.16039	0.37836	-0.02198	0.57926	0.23588	0.32013	0.29283												550.8	0.354266	0.11101	0.146789	0.377821	-0.0159911	0.591802	0.231901	0.329551	0.288377
552.9	-0.5211	-0.8341	-8.6636	-7.0983	1.6168	-2.6854	0.7495	-0.3999	-0.5198		552.9	0.40164	0.05775	0.16702	0.37234	0.05435	0.56256	0.25571	0.32277	0.28787												552.9	0.380656	0.0799097	0.153419	0.371801	0.0603389	0.575102	0.251731	0.332191	0.283417
555	-0.5328	-0.7885	-8.6586	-7.0809	1.6378	-2.6879	0.7595	-0.4356	-0.5013		555	0.38982	0.10194	0.17235	0.38953	0.07518	0.55916	0.26574	0.2871	0.30632												555	0.368836	0.1241	0.158749	0.388991	0.0811689	0.571702	0.261761	0.296521	0.301867
557.1	-0.5508	-0.8064	-8.6548	-7.0425	1.6304	-2.6952	0.7806	-0.4496	-0.4817		557.1	0.3717	0.08263	0.17647	0.42772	0.06761	0.55096	0.28688	0.27313	0.32587												557.1	0.350716	0.10479	0.162869	0.427181	0.0735989	0.563502	0.282901	0.282551	0.321417
559.2	-0.5561	-0.7172	-8.6812	-7.0762	1.6045	-2.6988	0.7694	-0.4318	-0.5308		559.2	0.36629	0.17043	0.1504	0.3938	0.04154	0.54646	0.27571	0.29097	0.27672												559.2	0.345306	0.19259	0.136799	0.393261	0.0475289	0.559002	0.271731	0.300391	0.272267
561.3	-0.5349	-0.7568	-8.6599	-7.0739	1.6057	-2.711	0.7794	-0.3961	-0.521		561.3	0.38737	0.12942	0.17203	0.39589	0.04257	0.53336	0.28575	0.3267	0.28646												561.3	0.366386	0.15158	0.158429	0.395351	0.0485589	0.545902	0.281771	0.336121	0.282007
563.4	-0.572	-0.735	-8.6586	-7.0844	1.5934	-2.6928	0.7545	-0.4356	-0.5087		563.4	0.35016	0.14981	0.17365	0.38518	0.03009	0.55066	0.26088	0.28723	0.29871												563.4	0.329176	0.17197	0.160049	0.384641	0.0360789	0.563202	0.256901	0.296651	0.294257
565.5	-0.6292	-0.6954	-8.6687	-7.0751	1.5712	-2.6976	0.7607	-0.4483	-0.4829		565.5	0.29284	0.18801	0.16388	0.39426	0.00772	0.54497	0.26711	0.27457	0.32446												565.5	0.271856	0.21017	0.150279	0.393721	0.0137089	0.557512	0.263131	0.283991	0.320007
567.6	-0.6758	-0.7291	-8.6246	-7.0879	1.5823	-2.683	0.7607	-0.442	-0.4583		567.6	0.24612	0.1529	0.20831	0.38125	0.01865	0.55867	0.26715	0.2809	0.34901												567.6	0.225136	0.17506	0.194709	0.380711	0.0246389	0.571212	0.263171	0.290321	0.344557
569.7	-0.7065	-0.7073	-8.6573	-7.0925	1.5823	-2.7391	0.7906	-0.4025	-0.5124		569.7	0.21531	0.17329	0.17593	0.37644	0.01848	0.50167	0.29708	0.32043	0.29485												569.7	0.194326	0.19545	0.162329	0.375901	0.0244689	0.514212	0.293101	0.329851	0.290397
571.8	-0.6789	-0.6597	-8.6599	-7.0949	1.5823	-2.7281	0.7744	-0.391	-0.4989		571.8	0.24279	0.21949	0.17366	0.37382	0.01831	0.51177	0.28091	0.33197	0.3083												571.8	0.221806	0.24165	0.160059	0.373281	0.0242989	0.524312	0.276931	0.341391	0.303847
573.9	-0.6885	-0.6974	-8.6347	-7.0797	1.6218	-2.6659	0.7719	-0.4356	-0.5075		573.9	0.23308	0.18038	0.19919	0.38881	0.05764	0.57307	0.27845	0.2874	0.29965												573.9	0.212096	0.20254	0.185589	0.388271	0.0636289	0.585612	0.274471	0.296821	0.295197
576	-0.6991	-0.7291	-8.6523	-7.0623	1.623	-2.6867	0.7831	-0.4674	-0.505		576	0.22236	0.14727	0.18191	0.40599	0.05867	0.55137	0.28968	0.25564	0.3021												576	0.201376	0.16943	0.168309	0.405451	0.0646589	0.563912	0.285701	0.265061	0.297647
578.1	-0.6885	-0.7231	-8.6272	-7.0472	1.5996	-2.7123	0.7781	-0.4318	-0.5075		578.1	0.23285	0.15187	0.20734	0.42088	0.03509	0.52487	0.28471	0.29127	0.29954												578.1	0.211866	0.17403	0.193739	0.420341	0.0410789	0.537412	0.280731	0.300691	0.295087
580.2	-0.644	-0.6716	-8.6397	-7.0809	1.5909	-2.6879	0.7968	-0.4229	-0.5357		580.2	0.27723	0.20196	0.19517	0.38697	0.02622	0.54837	0.30345	0.3002	0.27129												580.2	0.256246	0.22412	0.181569	0.386431	0.0322089	0.560912	0.299471	0.309621	0.266837
582.3	-0.609	-0.7271	-8.6699	-7.089	1.6168	-2.6964	0.7284	-0.4025	-0.5001		582.3	0.31211	0.14505	0.16529	0.37865	0.05195	0.53897	0.23508	0.32064	0.30684												582.3	0.291126	0.16721	0.151689	0.378111	0.0579389	0.551512	0.231101	0.330061	0.302387
584.4	-0.5815	-0.7093	-8.6548	-7.0797	1.6242	-2.694	0.7321	-0.3936	-0.4903		584.4	0.3395	0.16145	0.18072	0.38774	0.05918	0.54048	0.23882	0.32957	0.31659												584.4	0.318516	0.18361	0.167119	0.387201	0.0651689	0.553022	0.234841	0.338991	0.312137
586.5	-0.6323	-0.6776	-8.6397	-7.0518	1.5786	-2.6891	0.7222	-0.4483	-0.4743		586.5	0.28858	0.19174	0.19615	0.41543	0.01341	0.54448	0.22895	0.2749	0.33253												586.5	0.267596	0.2139	0.182549	0.414891	0.0193989	0.557022	0.224971	0.284321	0.328077
588.6	-0.68	-0.6261	-8.6661	-7.0669	1.5502	-2.7001	0.7209	-0.4139	-0.462		588.6	0.24077	0.24183	0.17007	0.40011	-0.01516	0.53258	0.22768	0.30934	0.34478												588.6	0.219786	0.26399	0.156469	0.399571	-0.00917109	0.545122	0.223701	0.318761	0.340327
590.7	-0.6599	-0.6974	-8.6787	-7.1065	1.5601	-2.7135	0.7297	-0.4241	-0.4608		590.7	0.26075	0.16913	0.1578	0.3603	-0.00544	0.51828	0.23652	0.29917	0.34593												590.7	0.239766	0.19129	0.144199	0.359761	0.000548907	0.530822	0.232541	0.308591	0.341477
592.8	-0.6387	-0.7073	-8.6712	-7.0925	1.607	-2.7049	0.7471	-0.4254	-0.5222		592.8	0.28184	0.15782	0.16563	0.37409	0.04129	0.52598	0.25395	0.29791	0.28448												592.8	0.260856	0.17998	0.152029	0.373551	0.0472789	0.538522	0.249971	0.307331	0.280027
594.9	-0.6991	-0.6716	-8.6913	-7.0762	1.6317	-2.7062	0.7408	-0.4407	-0.5308		594.9	0.22132	0.19211	0.14585	0.39017	0.06582	0.52378	0.24768	0.28264	0.27582												594.9	0.200336	0.21427	0.132249	0.389631	0.0718089	0.536322	0.243701	0.292061	0.271367
597	-0.7044	-0.6994	-8.69	-7.0611	1.5946	-2.6769	0.7781	-0.442	-0.5001		597	0.2159	0.16291	0.14748	0.40506	0.02855	0.55218	0.28502	0.28137	0.30647												597	0.194916	0.18507	0.133879	0.404521	0.0345389	0.564722	0.281041	0.290791	0.302017
599.1	-0.6853	-0.6776	-8.685	-7.0786	1.581	-2.6635	0.7707	-0.4216	-0.494		599.1	0.23489	0.1833	0.15281	0.38734	0.01478	0.56468	0.27765	0.30181	0.31252												599.1	0.213906	0.20546	0.139209	0.386801	0.0207689	0.577222	0.273671	0.311231	0.308067
601.2	-0.6408	-0.7053	-8.6888	-7.0937	1.6008	-2.6891	0.7657	-0.3757	-0.4841		601.2	0.27927	0.15419	0.14933	0.37203	0.03441	0.53818	0.27269	0.34774	0.32236												601.2	0.258286	0.17635	0.135729	0.371491	0.0403989	0.550722	0.268711	0.357161	0.317907
603.3	-0.627	-0.7231	-8.6473	-7.096	1.6168	-2.7232	0.7806	-0.4063	-0.4903		603.3	0.29296	0.13499	0.19116	0.36952	0.05024	0.50319	0.28762	0.31717	0.31611												603.3	0.271976	0.15715	0.177559	0.368981	0.0562289	0.515732	0.283641	0.326591	0.311657
605.4	-0.6503	-0.6835	-8.6624	-7.1007	1.5996	-2.7123	0.7819	-0.4814	-0.4927		605.4	0.26954	0.17318	0.17639	0.3646	0.03286	0.51319	0.28895	0.24211	0.31366												605.4	0.248556	0.19534	0.162789	0.364061	0.0388489	0.525732	0.284971	0.251531	0.309207
607.5	-0.6503	-0.6677	-8.6636	-7.089	1.6033	-2.7062	0.7781	-0.4662	-0.4854		607.5	0.26943	0.18757	0.17551	0.37609	0.03639	0.51839	0.28519	0.25734	0.32091												607.5	0.248446	0.20973	0.161909	0.375551	0.0423789	0.530932	0.281211	0.266761	0.316457
609.6	-0.5931	-0.6597	-8.6762	-7.1216	1.5638	-2.6867	0.7558	-0.4445	-0.4768		609.6	0.32651	0.19416	0.16324	0.34328	-0.00328	0.53699	0.26292	0.27907	0.32945												609.6	0.305526	0.21632	0.149639	0.342741	0.00270891	0.549532	0.258941	0.288491	0.324997
611.7	-0.5656	-0.6776	-8.6812	-7.1193	1.5675	-2.7135	0.752	-0.4369	-0.4719		611.7	0.35389	0.17486	0.15857	0.34536	0.00024974	0.50929	0.25915	0.28671	0.3343												611.7	0.332906	0.19702	0.144969	0.344821	0.00623865	0.521832	0.255171	0.296131	0.329847
613.8	-0.5328	-0.7073	-8.6498	-7.0809	1.5909	-2.6964	0.7284	-0.4572	-0.5235		613.8	0.38658	0.14375	0.19029	0.38355	0.02348	0.52549	0.23559	0.26644	0.28265												613.8	0.365596	0.16591	0.176689	0.383011	0.0294689	0.538032	0.231611	0.275861	0.278197
615.9	-0.5889	-0.6974	-8.6649	-7.0623	1.5909	-2.6672	0.7247	-0.4662	-0.4903		615.9	0.33036	0.15224	0.17552	0.40193	0.02331	0.55379	0.23192	0.25748	0.3158												615.9	0.309376	0.1744	0.161919	0.401391	0.0292989	0.566332	0.227941	0.266901	0.311347
618	-0.6429	-0.6657	-8.6863	-7.0786	1.5539	-2.6672	0.7881	-0.4509	-0.4743		618	0.27625	0.18254	0.15445	0.38542	-0.01386	0.55289	0.29535	0.27281	0.33174												618	0.255266	0.2047	0.140849	0.384881	-0.00787109	0.565432	0.291371	0.282231	0.327287
620.1	-0.627	-0.6617	-8.6775	-7.0949	1.5354	-2.6525	0.7893	-0.4432	-0.5173		620.1	0.29203	0.18513	0.16358	0.36891	-0.03254	0.56669	0.29659	0.28054	0.28869												620.1	0.271046	0.20729	0.149979	0.368371	-0.0265511	0.579232	0.292611	0.289961	0.284237
622.2	-0.6249	-0.6796	-8.6712	-7.089	1.5773	-2.6708	0.7955	-0.3936	-0.494		622.2	0.29402	0.16582	0.1702	0.37459	0.00919	0.5475	0.30282	0.33018	0.31194												622.2	0.273036	0.18798	0.156599	0.374051	0.0151789	0.560042	0.298841	0.339601	0.307487
624.3	-0.6313	-0.7152	-8.6448	-7.103	1.5675	-2.6793	0.7682	-0.4318	-0.4964		624.3	0.2875	0.12882	0.19693	0.36038	-0.000779351	0.5381	0.27556	0.29201	0.30949												624.3	0.266516	0.15098	0.183329	0.359841	0.00520956	0.550642	0.271581	0.301431	0.305037
626.4	-0.6599	-0.7013	-8.6448	-7.0669	1.5675	-2.6489	0.7408	-0.4763	-0.4989		626.4	0.25878	0.14131	0.19726	0.39627	-0.000950867	0.5676	0.24819	0.24754	0.30693												626.4	0.237796	0.16347	0.183659	0.395731	0.00503804	0.580142	0.244211	0.256961	0.302477
628.5	-0.6461	-0.6241	-8.7039	-7.0739	1.5527	-2.6489	0.757	-0.4483	-0.4829		628.5	0.27247	0.2171	0.13848	0.38905	-0.01592	0.5667	0.26442	0.27558	0.32288												628.5	0.251486	0.23926	0.124879	0.388511	-0.00993109	0.579242	0.260441	0.285001	0.318427
630.6	-0.6059	-0.6756	-8.7089	-7.0949	1.5687	-2.6635	0.7607	-0.4216	-0.5173		630.6	0.31255	0.1642	0.13381	0.36784	-9.38971e-05	0.5512	0.26816	0.30231	0.28843												630.6	0.291566	0.18636	0.120209	0.367301	0.00589501	0.563742	0.264181	0.311731	0.283977
632.7	-0.6228	-0.6855	-8.7165	-7.1239	1.607	-2.6769	0.7384	-0.4229	-0.4927		632.7	0.29554	0.15289	0.12654	0.33863	0.03803	0.5369	0.24589	0.30104	0.31298												632.7	0.274556	0.17505	0.112939	0.338091	0.0440189	0.549442	0.241911	0.310461	0.308527
634.8	-0.6588	-0.6796	-8.6988	-7.1018	1.6057	-2.6745	0.7272	-0.4369	-0.5099		634.8	0.25942	0.15738	0.14456	0.36051	0.03656	0.5384	0.23472	0.28708	0.29572												634.8	0.238436	0.17954	0.130959	0.359971	0.0425489	0.550942	0.230741	0.296501	0.291267
636.9	-0.7118	-0.638	-8.7051	-7.0728	1.5983	-2.6623	0.757	-0.4687	-0.4817		636.9	0.20631	0.19758	0.13859	0.3893	0.02899	0.5497	0.26456	0.25531	0.32387												636.9	0.185326	0.21974	0.124989	0.388761	0.0349789	0.562242	0.260581	0.264731	0.319417
639	-0.608	-0.6538	-8.7227	-7.0844	1.5613	-2.6733	0.7719	-0.4471	-0.521		639	0.30999	0.18037	0.12132	0.37748	-0.00818	0.5378	0.27949	0.27695	0.28452												639	0.289006	0.20253	0.107719	0.376941	-0.00219109	0.550342	0.275511	0.286371	0.280067
641.1	-0.5635	-0.6716	-8.6875	-7.0914	1.6008	-2.6525	0.7607	-0.405	-0.537		641.1	0.35437	0.16116	0.15684	0.37027	0.03115	0.5577	0.26832	0.31908	0.26847												641.1	0.333386	0.18332	0.143239	0.369731	0.0371389	0.570242	0.264341	0.328501	0.264017
643.2	-0.5296	-0.7152	-8.7089	-7.096	1.6107	-2.6598	0.7756	-0.4318	-0.5198		643.2	0.38816	0.11616	0.13577	0.36546	0.04088	0.54951	0.28326	0.29231	0.28561												643.2	0.367176	0.13832	0.122169	0.364921	0.0468689	0.562052	0.279281	0.301731	0.281157
645.3	-0.5296	-0.6677	-8.6875	-7.0751	1.6391	-2.6416	0.762	-0.4802	-0.5222		645.3	0.38804	0.16225	0.1575	0.38614	0.06911	0.56681	0.26969	0.24395	0.28316												645.3	0.367056	0.18441	0.143899	0.385601	0.0750989	0.579352	0.265711	0.253371	0.278707
647.4	-0.5953	-0.6677	-8.68	-7.0518	1.6168	-2.644	0.7632	-0.4522	-0.5185		647.4	0.32223	0.16084	0.16532	0.40923	0.04663	0.56351	0.27093	0.27198	0.28681												647.4	0.301246	0.183	0.151719	0.408691	0.0526189	0.576052	0.266951	0.281401	0.282357
649.5	-0.6037	-0.6934	-8.6875	-7.0413	1.581	-2.6464	0.7943	-0.4369	-0.5124		649.5	0.31371	0.13374	0.15815	0.41952	0.01066	0.56021	0.30206	0.28731	0.29285												649.5	0.292726	0.1559	0.144549	0.418981	0.0166489	0.572752	0.298081	0.296731	0.288397
651.6	-0.59	-0.6934	-8.69	-7.0716	1.6428	-2.6464	0.7806	-0.405	-0.521		651.6	0.3273	0.13233	0.15598	0.389	0.07229	0.55931	0.28839	0.31925	0.2842												651.6	0.306316	0.15449	0.142379	0.388461	0.0782789	0.571852	0.284411	0.328671	0.279747
653.7	-0.6376	-0.7449	-8.6838	-7.0786	1.6378	-2.6598	0.7744	-0.4114	-0.5013		653.7	0.27958	0.07942	0.1625	0.38179	0.06712	0.54501	0.28223	0.31288	0.30385												653.7	0.258596	0.10158	0.148899	0.381251	0.0731089	0.557552	0.278251	0.322301	0.299397
655.8	-0.6959	-0.6558	-8.6724	-7.0693	1.6168	-2.6355	0.7607	-0.4458	-0.5013		655.8	0.22116	0.16712	0.17423	0.39088	0.04595	0.56841	0.26856	0.27852	0.3038												655.8	0.200176	0.18928	0.160629	0.390341	0.0519389	0.580952	0.264581	0.287941	0.299347
657.9	-0.7107	-0.6558	-8.6988	-7.0797	1.6107	-2.6257	0.7756	-0.442	-0.4792		657.9	0.20625	0.16571	0.14816	0.38026	0.03968	0.57731	0.28349	0.28235	0.32584												657.9	0.185266	0.18787	0.134559	0.379721	0.0456689	0.589852	0.279511	0.291771	0.321387
660	-0.6652	-0.634	-8.6938	-7.0786	1.6267	-2.6574	0.793	-0.4114	-0.5149		660	0.25163	0.1861	0.15348	0.38115	0.0555	0.54471	0.30093	0.31298	0.29009												660	0.230646	0.20826	0.139879	0.380611	0.0614889	0.557252	0.296951	0.322401	0.285637
662.1	-0.6366	-0.6657	-8.7064	-7.0483	1.6341	-2.6842	0.8055	-0.405	-0.5493		662.1	0.28012	0.15299	0.14121	0.41123	0.06273	0.51702	0.31346	0.31942	0.25564												662.1	0.259136	0.17515	0.127609	0.410691	0.0687189	0.529562	0.309481	0.328841	0.251187
664.2	-0.6408	-0.6934	-8.685	-7.053	1.6526	-2.6647	0.7831	-0.4649	-0.5259		664.2	0.2758	0.12389	0.16294	0.40632	0.08106	0.53562	0.29109	0.25955	0.27899												664.2	0.254816	0.14605	0.149339	0.405781	0.0870489	0.548162	0.287111	0.268971	0.274537
666.3	-0.6525	-0.6954	-8.7026	-7.0611	1.665	-2.6525	0.7732	-0.4713	-0.5271		666.3	0.26399	0.12048	0.14566	0.39801	0.09329	0.54692	0.28123	0.25318	0.27773												666.3	0.243006	0.14264	0.132059	0.397471	0.0992789	0.559462	0.277251	0.262601	0.273277
668.4	-0.7054	-0.6578	-8.6687	-7.1065	1.6267	-2.6416	0.7781	-0.4827	-0.5112		668.4	0.21097	0.15667	0.17989	0.35239	0.05482	0.55692	0.28616	0.24182	0.29358												668.4	0.189986	0.17883	0.166289	0.351851	0.0608089	0.569462	0.282181	0.251241	0.289127
670.5	-0.68	-0.6518	-8.7051	-7.0762	1.6131	-2.644	0.7955	-0.4687	-0.5308		670.5	0.23625	0.16127	0.14382	0.38248	0.04105	0.55362	0.3036	0.25585	0.27393												670.5	0.215266	0.18343	0.130219	0.381941	0.0470389	0.566162	0.299621	0.265271	0.269477
672.6	-0.6217	-0.6459	-8.7542	-7.0855	1.6341	-2.6635	0.8042	-0.4343	-0.5112		672.6	0.29444	0.16576	0.09504	0.37297	0.06188	0.53322	0.31233	0.29028	0.29348												672.6	0.273456	0.18792	0.0814387	0.372431	0.0678689	0.545762	0.308351	0.299701	0.289027
674.7	-0.5656	-0.5983	-8.6913	-7.0867	1.6304	-2.6318	0.7993	-0.4369	-0.5222		674.7	0.35042	0.21195	0.15827	0.37155	0.058	0.56402	0.30746	0.28772	0.28242												674.7	0.329436	0.23411	0.144669	0.371011	0.0639889	0.576562	0.303481	0.297141	0.277967
676.8	-0.5391	-0.6102	-8.7077	-7.0762	1.5872	-2.6416	0.7881	-0.4432	-0.4792		676.8	0.37681	0.19865	0.1422	0.38184	0.01463	0.55332	0.2963	0.28145	0.32537												676.8	0.355826	0.22081	0.128599	0.381301	0.0206189	0.565862	0.292321	0.290871	0.320917
678.9	-0.5328	-0.6459	-8.7165	-7.0716	1.6144	-2.6537	0.798	-0.4496	-0.5099		678.9	0.38299	0.16154	0.13372	0.38623	0.04166	0.54032	0.30623	0.27509	0.29462												678.9	0.362006	0.1837	0.120119	0.385691	0.0476489	0.552862	0.302251	0.284511	0.290167
681	-0.4999	-0.6518	-8.6951	-7.0693	1.6144	-2.6172	0.8067	-0.3961	-0.4792		681	0.41578	0.15423	0.15545	0.38831	0.04149	0.57593	0.31496	0.32862	0.32527												681	0.394796	0.17639	0.141849	0.387771	0.0474789	0.588472	0.310981	0.338041	0.320817
683.1	-0.5561	-0.6716	-8.7014	-7.0983	1.6391	-2.6257	0.8129	-0.377	-0.5161		683.1	0.35946	0.13303	0.14948	0.3591	0.06602	0.56653	0.3212	0.34775	0.28831												683.1	0.338476	0.15519	0.135879	0.358561	0.0720089	0.579072	0.317221	0.357171	0.283857
685.2	-0.6323	-0.7093	-8.6611	-7.0728	1.6502	-2.6355	0.7831	-0.4292	-0.5394		685.2	0.28314	0.09392	0.1901	0.38438	0.07695	0.55583	0.29143	0.29559	0.26496												685.2	0.262156	0.11608	0.176499	0.383841	0.0829389	0.568372	0.287451	0.305011	0.260507
687.3	-0.7277	-0.636	-8.6787	-7.0739	1.6452	-2.6184	0.7819	-0.4585	-0.5026		687.3	0.18763	0.16581	0.17283	0.38307	0.07178	0.57203	0.29026	0.26632	0.30171												687.3	0.166646	0.18797	0.159229	0.382531	0.0777689	0.584572	0.286281	0.275741	0.297257
689.4	-0.7414	-0.6914	-8.6976	-7.0867	1.6588	-2.6379	0.7843	-0.4076	-0.548		689.4	0.17381	0.10901	0.15426	0.37006	0.0852	0.55163	0.2927	0.31725	0.25626												689.4	0.152826	0.13117	0.140659	0.369521	0.0911889	0.564172	0.288721	0.326671	0.251807
691.5	-0.7107	-0.6677	-8.68	-7.0855	1.6847	-2.6452	0.7794	-0.405	-0.5468		691.5	0.2044	0.1313	0.17219	0.37104	0.11093	0.54343	0.28783	0.31989	0.2574												691.5	0.183416	0.15346	0.158589	0.370501	0.116919	0.555972	0.283851	0.329311	0.252947
693.6	-0.627	-0.7073	-8.6448	-7.089	1.665	-2.6355	0.7346	-0.4152	-0.5185		693.6	0.28798	0.09029	0.20771	0.36733	0.09106	0.55223	0.24307	0.30972	0.28565												693.6	0.266996	0.11245	0.194109	0.366791	0.0970489	0.564772	0.239091	0.319141	0.281197
695.7	-0.6175	-0.6261	-8.6661	-7.0704	1.6786	-2.6025	0.7458	-0.4725	-0.5124		695.7	0.29737	0.17009	0.18674	0.38572	0.10449	0.58433	0.2543	0.25245	0.2917												695.7	0.276386	0.19225	0.173139	0.385181	0.110479	0.596872	0.250321	0.261871	0.287247
697.8	-0.5794	-0.638	-8.6938	-7.0809	1.6403	-2.6001	0.7719	-0.4572	-0.4903		697.8	0.33535	0.15678	0.15937	0.375	0.06602	0.58583	0.28043	0.26779	0.31374												697.8	0.314366	0.17894	0.145769	0.374461	0.0720089	0.598372	0.276451	0.277211	0.309287
699.9	-0.5667	-0.6776	-8.7051	-7.0634	1.6354	-2.6257	0.7533	-0.4178	-0.5149		699.9	0.34793	0.11577	0.14839	0.39229	0.06095	0.55934	0.26187	0.30722	0.28909												699.9	0.326946	0.13793	0.134789	0.391751	0.0669389	0.571882	0.257891	0.316641	0.284637
702	-0.5656	-0.735	-8.6812	-7.0704	1.6662	-2.6391	0.7781	-0.4063	-0.5173		702	0.34892	0.05697	0.17262	0.38508	0.09157	0.54504	0.2867	0.31876	0.28664												702	0.327936	0.0791297	0.159019	0.384541	0.0975589	0.557582	0.282721	0.328181	0.282187
704.1	-0.5836	-0.7628	-8.685	-7.0693	1.6539	-2.6233	0.7595	-0.456	-0.5443		704.1	0.3308	0.02776	0.16915	0.38596	0.0791	0.55994	0.26813	0.26909	0.25959												704.1	0.309816	0.0499197	0.155549	0.385421	0.0850889	0.572482	0.264151	0.278511	0.255137
706.2	-0.6154	-0.7291	-8.6724	-7.0588	1.6613	-2.605	0.7582	-0.4763	-0.5063		706.2	0.29889	0.06005	0.18207	0.39625	0.08633	0.57734	0.26687	0.24882	0.29753												706.2	0.277906	0.0822097	0.168469	0.395711	0.0923189	0.589882	0.262891	0.258241	0.293077
708.3	-0.6059	-0.6439	-8.6926	-7.0379	1.6354	-2.6196	0.7769	-0.4432	-0.4854		708.3	0.30827	0.14385	0.1622	0.41693	0.06026	0.56184	0.2856	0.28196	0.31838												708.3	0.287286	0.16601	0.148599	0.416391	0.0662489	0.574382	0.281621	0.291381	0.313927
710.4	-0.573	-0.6558	-8.69	-7.0669	1.644	-2.6294	0.7533	-0.4012	-0.5099		710.4	0.34106	0.13054	0.16513	0.38772	0.06869	0.55114	0.26203	0.32399	0.29383												710.4	0.320076	0.1527	0.151529	0.387181	0.0746789	0.563682	0.258051	0.333411	0.289377
712.5	-0.5317	-0.6399	-8.6775	-7.0437	1.6477	-2.616	0.7607	-0.3732	-0.5112		712.5	0.38224	0.14503	0.17795	0.41071	0.07222	0.56364	0.26947	0.35202	0.29248												712.5	0.361256	0.16719	0.164349	0.410171	0.0782089	0.576182	0.265491	0.361441	0.288027
714.6	-0.5148	-0.6023	-8.6687	-7.0658	1.6304	-2.6221	0.7831	-0.419	-0.4977		714.6	0.39902	0.18122	0.18708	0.38839	0.05475	0.55664	0.2919	0.30626	0.30592												714.6	0.378036	0.20338	0.173479	0.387851	0.0607389	0.569182	0.287921	0.315681	0.301467
716.7	-0.6207	-0.5785	-8.6762	-7.0355	1.6539	-2.5977	0.762	-0.4585	-0.4854		716.7	0.29301	0.20362	0.17991	0.41848	0.07807	0.58014	0.27084	0.26679	0.31817												716.7	0.272026	0.22578	0.166309	0.417941	0.0840589	0.592682	0.266861	0.276211	0.313717
718.8	-0.6503	-0.5924	-8.6762	-7.0402	1.6465	-2.594	0.7669	-0.4572	-0.4952		718.8	0.26329	0.18831	0.18023	0.41357	0.0705	0.58295	0.27577	0.26813	0.30832												718.8	0.242306	0.21047	0.166629	0.413031	0.0764889	0.595492	0.271791	0.277551	0.303867
720.9	-0.6429	-0.5904	-8.6762	-7.0565	1.6687	-2.6208	0.7707	-0.4356	-0.494		720.9	0.27058	0.1889	0.18056	0.39705	0.09253	0.55525	0.2796	0.28976	0.30947												720.9	0.249596	0.21106	0.166959	0.396511	0.0985189	0.567792	0.275621	0.299181	0.305017
723	-0.6292	-0.6063	-8.6988	-7.0216	1.6489	-2.6281	0.7545	-0.3999	-0.5161		723	0.28416	0.1716	0.15829	0.43174	0.07256	0.54705	0.26344	0.32549	0.28731												723	0.263176	0.19376	0.144689	0.431201	0.0785489	0.559592	0.259461	0.334911	0.282857
725.1	-0.6164	-0.5746	-8.7064	-7.0297	1.644	-2.5989	0.7781	-0.4496	-0.5247		725.1	0.29685	0.20189	0.15101	0.42342	0.06749	0.57535	0.28707	0.27583	0.27866												725.1	0.275866	0.22405	0.137409	0.422881	0.0734789	0.587892	0.283091	0.285251	0.274207
727.2	-0.6419	-0.5488	-8.7265	-7.032	1.6403	-2.5843	0.7732	-0.47	-0.4891		727.2	0.27123	0.22628	0.13124	0.42091	0.06362	0.58905	0.2822	0.25546	0.31421												727.2	0.250246	0.24844	0.117639	0.420371	0.0696089	0.601592	0.278221	0.264881	0.309757
729.3	-0.5963	-0.5349	-8.7429	-7.0344	1.6452	-2.6025	0.7806	-0.442	-0.4977		729.3	0.31671	0.23878	0.11517	0.4183	0.06834	0.56995	0.28964	0.28349	0.30556												729.3	0.295726	0.26094	0.101569	0.417761	0.0743289	0.582492	0.285661	0.292911	0.301107
731.4	-0.5222	-0.5924	-8.7504	-7.039	1.6452	-2.6318	0.7533	-0.3846	-0.521		731.4	0.3907	0.17987	0.10799	0.41348	0.06817	0.53975	0.26237	0.34093	0.2822												731.4	0.369716	0.20203	0.0943887	0.412941	0.0741589	0.552292	0.258391	0.350351	0.277747
733.5	-0.5169	-0.6459	-8.7844	-7.032	1.6662	-2.6318	0.7185	-0.3999	-0.5136		733.5	0.39588	0.12496	0.07432	0.42027	0.089	0.53885	0.2276	0.32566	0.28955												733.5	0.374896	0.14712	0.0607187	0.419731	0.0949889	0.551392	0.223621	0.335081	0.285097
735.6	-0.5857	-0.5904	-8.773	-7.0216	1.6699	-2.633	0.7657	-0.4496	-0.5554		735.6	0.32697	0.17906	0.08605	0.43046	0.09253	0.53675	0.27484	0.27599	0.2477												735.6	0.305986	0.20122	0.0724487	0.429921	0.0985189	0.549292	0.270861	0.285411	0.243247
737.7	-0.6503	-0.5825	-8.7668	-7.06	1.6699	-2.6391	0.7669	-0.4203	-0.5591		737.7	0.26225	0.18555	0.09257	0.39184	0.09236	0.52976	0.27607	0.30533	0.24395												737.7	0.241266	0.20771	0.0789687	0.391301	0.0983489	0.542302	0.272091	0.314751	0.239497
739.8	-0.663	-0.6082	-8.7341	-7.06	1.6588	-2.655	0.7819	-0.4458	-0.5652		739.8	0.24944	0.15844	0.1256	0.39163	0.08109	0.51296	0.29111	0.27986	0.23779												739.8	0.228456	0.1806	0.111999	0.391091	0.0870789	0.525502	0.287131	0.289281	0.233337
741.9	-0.6503	-0.7311	-8.7517	-7.0425	1.6625	-2.6537	0.7707	-0.428	-0.5407		741.9	0.26202	0.03414	0.10833	0.40892	0.08462	0.51336	0.27994	0.2977	0.26224												741.9	0.241036	0.0562997	0.0947287	0.408381	0.0906089	0.525902	0.275961	0.307121	0.257787
744	-0.6514	-0.7212	-8.7479	-7.0425	1.6724	-2.6281	0.762	-0.4585	-0.553		744	0.2608	0.04263	0.11245	0.4087	0.09434	0.53806	0.27127	0.26723	0.24989												744	0.239816	0.0647897	0.0988487	0.408161	0.100329	0.550602	0.267291	0.276651	0.245437
746.1	-0.7022	-0.6994	-8.7202	-7.0239	1.6403	-2.6342	0.7769	-0.498	-0.4977		746.1	0.20989	0.06302	0.14048	0.42709	0.06207	0.53106	0.28621	0.22776	0.30514												746.1	0.188906	0.0851797	0.126879	0.426551	0.0680589	0.543602	0.282231	0.237181	0.300687
748.2	-0.6789	-0.6399	-8.7265	-7.0251	1.6292	-2.6342	0.762	-0.5018	-0.5235		748.2	0.23307	0.12112	0.13451	0.42567	0.0508	0.53016	0.27134	0.224	0.27928												748.2	0.212086	0.14328	0.120909	0.425131	0.0567889	0.542702	0.267361	0.233421	0.274827
750.3	-0.6323	-0.6221	-8.7517	-7.046	1.6674	-2.6464	0.7309	-0.4789	-0.5198		750.3	0.27956	0.13751	0.10963	0.40456	0.08883	0.51706	0.24027	0.24693	0.28293												750.3	0.258576	0.15967	0.0960287	0.404021	0.0948189	0.529602	0.236291	0.256351	0.278477
752.4	-0.626	-0.6518	-8.7504	-7.039	1.6835	-2.6245	0.7694	-0.405	-0.5419		752.4	0.28574	0.1064	0.11126	0.41135	0.10476	0.53806	0.27881	0.32086	0.26078												752.4	0.264756	0.12856	0.0976587	0.410811	0.110749	0.550602	0.274831	0.330281	0.256327
754.5	-0.5889	-0.6538	-8.7391	-7.0262	1.7106	-2.6367	0.7893	-0.4522	-0.5333		754.5	0.32273	0.103	0.12289	0.42393	0.13169	0.52496	0.29874	0.2737	0.26932												754.5	0.301746	0.12516	0.109289	0.423391	0.137679	0.537502	0.294761	0.283121	0.264867
756.6	-0.5698	-0.6221	-8.7341	-7.0495	1.6995	-2.5965	0.7719	-0.498	-0.537		756.6	0.34171	0.13329	0.12821	0.40042	0.12042	0.56427	0.28137	0.22793	0.26557												756.6	0.320726	0.15545	0.114609	0.399881	0.126409	0.576812	0.277391	0.237351	0.261117
758.7	-0.5232	-0.6756	-8.7554	-7.0227	1.6786	-2.6184	0.7545	-0.4611	-0.5431		758.7	0.38819	0.07838	0.10724	0.42701	0.09934	0.54147	0.26401	0.26486	0.25942												758.7	0.367206	0.10054	0.0936387	0.426471	0.105329	0.554012	0.260031	0.274281	0.254967
760.8	-0.4915	-0.6578	-8.7416	-7.0588	1.6835	-2.6123	0.7172	-0.4369	-0.5517		760.8	0.41978	0.09478	0.12137	0.39069	0.10407	0.54667	0.22674	0.2891	0.25077												760.8	0.398796	0.11694	0.107769	0.390151	0.110059	0.559212	0.222761	0.298521	0.246317
762.9	-0.4777	-0.6597	-8.7253	-7.0413	1.7193	-2.6172	0.7458	-0.4101	-0.5321		762.9	0.43346	0.09147	0.138	0.40798	0.1397	0.54087	0.25538	0.31593	0.27031												762.9	0.412476	0.11363	0.124399	0.407441	0.145689	0.553412	0.251401	0.325351	0.265857
765	-0.5264	-0.6399	-8.7215	-7.046	1.7612	-2.6038	0.7533	-0.4394	-0.537		765	0.38465	0.10986	0.14212	0.40307	0.18143	0.55337	0.26291	0.28667	0.26536												765	0.363666	0.13202	0.128519	0.402531	0.187419	0.565912	0.258931	0.296091	0.260907
767.1	-0.5963	-0.6082	-8.7177	-7.0553	1.7131	-2.5843	0.7558	-0.5005	-0.5247		767.1	0.31463	0.14016	0.14625	0.39355	0.13316	0.57197	0.26544	0.2256	0.27761												767.1	0.293646	0.16232	0.132649	0.393011	0.139149	0.584512	0.261461	0.235021	0.273157
769.2	-0.6122	-0.6063	-8.7278	-7.0553	1.7143	-2.5965	0.7371	-0.4483	-0.4964		769.2	0.29862	0.14065	0.13648	0.39334	0.13419	0.55887	0.24678	0.27783	0.30586												769.2	0.277636	0.16281	0.122879	0.392801	0.140179	0.571412	0.242801	0.287251	0.301407
771.3	-0.6461	-0.6459	-8.7152	-7.0297	1.7045	-2.5977	0.7806	-0.3885	-0.5099		771.3	0.2646	0.09964	0.1494	0.41872	0.12421	0.55677	0.29031	0.33767	0.2923												771.3	0.243616	0.1218	0.135799	0.418181	0.130199	0.569312	0.286331	0.347091	0.287847
773.4	-0.6355	-0.6241	-8.7114	-7.0134	1.7069	-2.6038	0.7359	-0.4216	-0.5075		773.4	0.27508	0.12003	0.15353	0.43481	0.12644	0.54977	0.24564	0.3046	0.29465												773.4	0.254096	0.14219	0.139929	0.434271	0.132429	0.562312	0.241661	0.314021	0.290197
775.5	-0.6355	-0.6043	-8.68	-7.0309	1.7773	-2.5672	0.7321	-0.4649	-0.5136		775.5	0.27497	0.13843	0.18526	0.4171	0.19667	0.58548	0.24188	0.26133	0.2885												775.5	0.253986	0.16059	0.171659	0.416561	0.202659	0.598022	0.237901	0.270751	0.284047
777.6	-0.6207	-0.5488	-8.7014	-7.0239	1.7143	-2.583	0.7645	-0.4814	-0.5222		777.6	0.28965	0.19252	0.16418	0.42388	0.1335	0.56878	0.27431	0.24487	0.27985												777.6	0.268666	0.21468	0.150579	0.423341	0.139489	0.581322	0.270331	0.254291	0.275397
779.7	-0.5931	-0.5884	-8.7152	-7.0379	1.6921	-2.6086	0.7222	-0.4445	-0.5333		779.7	0.31714	0.15151	0.15071	0.40967	0.11113	0.54228	0.23204	0.2818	0.26869												779.7	0.296156	0.17367	0.137109	0.409131	0.117119	0.554822	0.228061	0.291221	0.264237
781.8	-0.609	-0.5627	-8.7253	-7.0972	1.6971	-2.7025	0.6986	-0.4598	-0.5566		781.8	0.30112	0.17581	0.14094	0.35016	0.11596	0.44748	0.20848	0.26654	0.24534												781.8	0.280136	0.19797	0.127339	0.349621	0.121949	0.460022	0.204501	0.275961	0.240887
783.9	-0.6292	-0.6102	-8.7403	-7.1146	1.7082	-2.7318	0.7073	-0.5082	-0.591		783.9	0.2808	0.1269	0.12626	0.33254	0.12689	0.41728	0.21721	0.21817	0.21089												783.9	0.259816	0.14906	0.112659	0.332001	0.132879	0.429822	0.213231	0.227591	0.206437
786	-0.6578	-0.5488	-8.7479	-7.1425	1.7094	-2.7281	0.6613	-0.5706	-0.607		786	0.25209	0.18689	0.11899	0.30443	0.12791	0.42008	0.17125	0.1558	0.19484												786	0.231106	0.20905	0.105389	0.303891	0.133899	0.432622	0.167271	0.165221	0.190387
788.1	-0.6673	-0.5587	-8.7793	-7.167	1.644	-2.75	0.6663	-0.577	-0.6316		788.1	0.24247	0.17559	0.08792	0.27972	0.06234	0.39728	0.17628	0.14944	0.17018												788.1	0.221486	0.19775	0.0743187	0.279181	0.0683289	0.409822	0.172301	0.158861	0.165727
790.2	-0.6408	-0.6082	-8.7844	-7.1984	1.6205	-2.7842	0.6389	-0.5439	-0.6721		790.2	0.26886	0.12468	0.08314	0.2481	0.03867	0.36218	0.14891	0.18257	0.12963												790.2	0.247876	0.14684	0.0695387	0.247561	0.0446589	0.374722	0.144931	0.191991	0.125177
792.3	-0.6461	-0.6142	-8.8208	-7.2065	1.6514	-2.8159	0.6165	-0.5349	-0.6709		792.3	0.26344	0.11727	0.04707	0.23979	0.0694	0.32958	0.12655	0.1916	0.13078												792.3	0.242456	0.13943	0.0334687	0.239251	0.0753889	0.342122	0.122571	0.201021	0.126327
794.4	-0.6673	-0.6439	-8.8246	-7.2275	1.6193	-2.822	0.5705	-0.5566	-0.6771		794.4	0.24213	0.08617	0.0436	0.21857	0.03713	0.32259	0.08058	0.16994	0.12453												794.4	0.221146	0.10833	0.0299987	0.218031	0.0431189	0.335132	0.0766008	0.179361	0.120077
796.5	-0.7224	-0.6003	-8.8208	-7.2403	1.5983	-2.8403	0.5867	-0.5973	-0.6746		796.5	0.18691	0.12836	0.04772	0.20556	0.01596	0.30339	0.09681	0.12927	0.12697												796.5	0.165926	0.15052	0.0341187	0.205021	0.0219489	0.315932	0.0928308	0.138691	0.122517
798.6	-0.7954	-0.6142	-8.8196	-7.2531	1.5736	-2.85	0.5842	-0.5986	-0.6881		798.6	0.11379	0.11305	0.04925	0.19255	-0.00892	0.29279	0.09435	0.128	0.11342												798.6	0.0928056	0.13521	0.0356487	0.192011	-0.00293109	0.305332	0.0903708	0.137421	0.108967
800.7	-0.8389	-0.6221	-8.846	-7.2821	1.565	-2.8793	0.5966	-0.577	-0.7029		800.7	0.07018	0.10375	0.02318	0.16333	-0.01769	0.26259	0.10678	0.14964	0.09857												800.7	0.0491956	0.12591	0.00957871	0.162791	-0.0117011	0.275132	0.102801	0.159061	0.0941174
802.8	-0.8346	-0.6479	-8.8246	-7.2659	1.6156	-2.9012	0.5407	-0.5553	-0.7151		802.8	0.07436	0.07654	0.0449	0.17932	0.03274	0.23979	0.05091	0.17137	0.08631												802.8	0.0533756	0.0986997	0.0312987	0.178781	0.0387289	0.252332	0.0469308	0.180791	0.0818574
804.9	-0.8791	-0.6597	-8.8485	-7.2565	1.607	-2.8866	0.5469	-0.6075	-0.6734		804.9	0.02975	0.06333	0.02133	0.18851	0.02397	0.25349	0.05715	0.11921	0.12796												804.9	0.00876556	0.0854897	0.00772871	0.187971	0.0299589	0.266032	0.0531708	0.128631	0.123507
807	-0.8675	-0.6201	-8.8196	-7.2693	1.5835	-2.8951	0.5507	-0.6088	-0.7348		807	0.04123	0.10153	0.05056	0.17549	0.000298824	0.24409	0.06098	0.11794	0.06651												807	0.0202456	0.12369	0.0369587	0.174951	0.00628773	0.256632	0.0570008	0.127361	0.0620574
809.1	-0.8262	-0.5726	-8.8586	-7.2856	1.5675	-2.8866	0.578	-0.5846	-0.7324		809.1	0.08242	0.14762	0.01188	0.15898	-0.01587	0.25169	0.08832	0.14217	0.06886												809.1	0.0614356	0.16978	-0.00172129	0.158441	-0.00988109	0.264232	0.0843408	0.151591	0.0644074
811.2	-0.7563	-0.6261	-8.8498	-7.3345	1.5909	-2.9207	0.619	-0.5872	-0.7238		811.2	0.1522	0.09271	0.02101	0.10986	0.00736	0.21669	0.12935	0.13961	0.0774												811.2	0.131216	0.11487	0.00740871	0.109321	0.0133489	0.229232	0.125371	0.149031	0.0729474
813.3	-0.7192	-0.628	-8.8686	-7.3101	1.5761	-2.9426	0.5904	-0.6165	-0.7324		813.3	0.18918	0.08941	0.00254	0.13405	-0.00762	0.19389	0.10078	0.11034	0.06875												813.3	0.168196	0.11157	-0.0110613	0.133511	-0.00163109	0.206432	0.0968008	0.119761	0.0642974
815.4	-0.7022	-0.6043	-8.8498	-7.2798	1.5699	-2.9024	0.5519	-0.6432	-0.7213		815.4	0.20607	0.1117	0.02166	0.16414	-0.01399	0.2332	0.06232	0.08367	0.0798												815.4	0.185086	0.13386	0.00805871	0.163601	-0.00800109	0.245742	0.0583408	0.0930913	0.0753474
817.5	-0.7774	-0.6043	-8.8586	-7.3077	1.5366	-2.9231	0.5295	-0.6559	-0.6918		817.5	0.13075	0.11029	0.01319	0.13602	-0.04746	0.2116	0.03995	0.07101	0.10925												817.5	0.109766	0.13245	-0.00041129	0.135481	-0.0414711	0.224142	0.0359708	0.0804313	0.104797
819.6	-0.8039	-0.6439	-8.8787	-7.2984	1.5317	-2.9329	0.527	-0.6152	-0.7446		819.6	0.10414	0.06929	-0.00658	0.14511	-0.05253	0.2009	0.03748	0.11174	0.05639												819.6	0.0831556	0.0914497	-0.0201813	0.144571	-0.0465411	0.213442	0.0335008	0.121161	0.0519374
821.7	-0.8346	-0.6974	-8.8724	-7.3345	1.5625	-2.95	0.5072	-0.6483	-0.7225		821.7	0.07332	0.01438	4.46204e-05	0.1088	-0.0219	0.1829	0.01772	0.07867	0.07844												821.7	0.0523356	0.0365397	-0.0135567	0.108261	-0.0159111	0.195442	0.0137408	0.0880913	0.0739874
823.8	-0.8844	-0.7073	-8.8925	-7.3194	1.5773	-2.9561	0.5196	-0.6266	-0.7434		823.8	0.02341	0.00307	-0.01973	0.12368	-0.00727	0.1759	0.03015	0.10041	0.05749												823.8	0.00242556	0.0252297	-0.0333313	0.123141	-0.00128109	0.188442	0.0261708	0.109831	0.0530374
825.9	-0.931	-0.7747	-8.8749	-7.3554	1.4786	-2.9561	0.5022	-0.6801	-0.7434		825.9	-0.02331	-0.06574	-0.0018	0.08747	-0.10614	0.175	0.01278	0.04694	0.05744												825.9	-0.0442944	-0.0435803	-0.0154013	0.0869313	-0.100151	0.187542	0.00880081	0.0563613	0.0529874
828	-0.9098	-0.7509	-8.8737	-7.3554	1.507	-2.9561	0.5333	-0.7133	-0.7213		828	-0.00223	-0.04334	-0.00027508	0.08726	-0.07792	0.1741	0.04392	0.01378	0.07948												828	-0.0232144	-0.0211803	-0.0138764	0.0867213	-0.0719311	0.186642	0.0399408	0.0232013	0.0750274
830.1	-0.8982	-0.7826	-8.8774	-7.3729	1.5119	-2.9707	0.5345	-0.6534	-0.7483		830.1	0.00926	-0.07645	-0.00365	0.06954	-0.07319	0.1586	0.04515	0.07371	0.05243												830.1	-0.0117244	-0.0542903	-0.0172513	0.0690013	-0.0672011	0.171142	0.0411708	0.0831313	0.0479774
832.2	-0.8378	-0.7707	-8.8862	-7.3601	1.507	-2.9853	0.5221	-0.6521	-0.7459		832.2	0.06954	-0.06596	-0.01212	0.08213	-0.07826	0.1431	0.03279	0.07504	0.05478												832.2	0.0485556	-0.0438003	-0.0257213	0.0815913	-0.0722711	0.155642	0.0288108	0.0844613	0.0503274
834.3	-0.8262	-0.8499	-8.9076	-7.3601	1.528	-2.9756	0.5121	-0.6432	-0.7274		834.3	0.08103	-0.14656	-0.03319	0.08191	-0.05743	0.15191	0.02282	0.08398	0.07323												834.3	0.0600456	-0.1244	-0.0467913	0.0813713	-0.0514411	0.164452	0.0188408	0.0934013	0.0687774
836.4	-0.8071	-0.7766	-8.8812	-7.3345	1.5144	-2.9682	0.527	-0.698	-0.7655		836.4	0.10001	-0.07467	-0.00647	0.1073	-0.0712	0.15841	0.03775	0.02921	0.03507												836.4	0.0790256	-0.0525103	-0.0200713	0.106761	-0.0652111	0.170952	0.0337708	0.0386313	0.0306174
838.5	-0.77	-0.7548	-8.8799	-7.3554	1.4811	-2.9646	0.5159	-0.7082	-0.7729		838.5	0.137	-0.05428	-0.00484	0.08619	-0.10467	0.16111	0.02669	0.01904	0.02762												838.5	0.116016	-0.0321203	-0.0184413	0.0856513	-0.0986811	0.173652	0.0227108	0.0284613	0.0231674
840.6	-0.7594	-0.8044	-8.9126	-7.3636	1.4872	-2.9768	0.4761	-0.684	-0.7741		840.6	0.14748	-0.10528	-0.03721	0.07777	-0.09875	0.14801	-0.01308	0.04328	0.02637												840.6	0.126496	-0.0831203	-0.0508113	0.0772313	-0.0927611	0.160552	-0.0170592	0.0527013	0.0219174
842.7	-0.7107	-0.7509	-8.8938	-7.3682	1.4897	-2.9951	0.4549	-0.6661	-0.795		842.7	0.19606	-0.05319	-0.01809	0.07296	-0.09642	0.12881	-0.03425	0.06121	0.00542												842.7	0.175076	-0.0310303	-0.0316913	0.0724213	-0.0904311	0.141352	-0.0382292	0.0706313	0.00096738
844.8	-0.6864	-0.7667	-8.8749	-7.3601	1.4959	-2.9609	0.4984	-0.6725	-0.7864		844.8	0.22025	-0.0704	0.00114	0.08085	-0.09039	0.16211	0.00929	0.05485	0.01396												844.8	0.199266	-0.0482403	-0.0124613	0.0803113	-0.0844011	0.174652	0.00531081	0.0642713	0.00950738
846.9	-0.6768	-0.7311	-8.885	-7.3403	1.5181	-2.978	0.537	-0.6852	-0.7852		846.9	0.22973	-0.0362	-0.00863	0.10043	-0.06836	0.14411	0.04792	0.04218	0.01511												846.9	0.208746	-0.0140403	-0.0222313	0.0998913	-0.0623711	0.156652	0.0439408	0.0516013	0.0106574
849	-0.6938	-0.6875	-8.9064	-7.3519	1.4786	-2.9707	0.5009	-0.675	-0.7889		849	0.21262	0.00599	-0.02971	0.08862	-0.10803	0.15051	0.01185	0.05241	0.01136												849	0.191636	0.0281497	-0.0433113	0.0880813	-0.102041	0.163052	0.00787081	0.0618313	0.00690738
851.1	-0.6864	-0.7568	-8.9214	-7.3729	1.4774	-2.9658	0.4624	-0.6661	-0.7815		851.1	0.2199	-0.06472	-0.04438	0.06741	-0.1094	0.15451	-0.02661	0.06135	0.0187												851.1	0.198916	-0.0425603	-0.0579813	0.0668713	-0.103411	0.167052	-0.0305892	0.0707713	0.0142474
853.2	-0.7764	-0.7964	-8.9126	-7.3554	1.5181	-2.9878	0.4674	-0.6738	-0.7729		853.2	0.12979	-0.10572	-0.03525	0.08469	-0.06887	0.13162	-0.02158	0.05368	0.02725												853.2	0.108806	-0.0835603	-0.0488513	0.0841513	-0.0628811	0.144162	-0.0255592	0.0631013	0.0227974
855.3	-0.8791	-0.739	-8.9089	-7.345	1.528	-2.989	0.4612	-0.6878	-0.8073		855.3	0.02697	-0.04973	-0.03123	0.09488	-0.05915	0.12952	-0.02774	0.03971	-0.0072												855.3	0.00598556	-0.0275703	-0.0448313	0.0943413	-0.0531611	0.142062	-0.0317192	0.0491313	-0.0116526
857.4	-0.9808	-0.7489	-8.9013	-7.3531	1.4589	-2.9646	0.4711	-0.6916	-0.7827		857.4	-0.07485	-0.06104	-0.0233	0.08656	-0.12842	0.15302	-0.01781	0.03595	0.01735												857.4	-0.0958344	-0.0388803	-0.0369013	0.0860213	-0.122431	0.165562	-0.0217892	0.0453713	0.0128974
859.5	-1.0147	-0.7806	-8.9202	-7.3566	1.4502	-2.9536	0.4686	-0.6827	-0.7754		859.5	-0.10886	-0.09414	-0.04187	0.08285	-0.13729	0.16312	-0.02028	0.04488	0.02459												859.5	-0.129844	-0.0719803	-0.0554713	0.0823113	-0.131301	0.175662	-0.0242592	0.0543013	0.0201374
861.6	-0.9956	-0.8044	-8.9252	-7.3845	1.486	-2.9829	0.4897	-0.6814	-0.7901		861.6	-0.08988	-0.11935	-0.04655	0.05474	-0.10166	0.13292	0.000856594	0.04621	0.00984												861.6	-0.110864	-0.0971903	-0.0601513	0.0542013	-0.0956711	0.145462	-0.00312259	0.0556313	0.00538738
863.7	-0.9617	-0.8638	-8.8988	-7.3857	1.5329	-2.9622	0.4475	-0.6687	-0.7766		863.7	-0.05609	-0.18016	-0.01982	0.05332	-0.05493	0.15272	-0.04131	0.05895	0.02329												863.7	-0.0770744	-0.158	-0.0334213	0.0527813	-0.0489411	0.165262	-0.0452892	0.0683713	0.0188374
865.8	-0.8918	-0.8222	-8.8925	-7.3764	1.4761	-2.9829	0.4773	-0.7031	-0.7901		865.8	0.01369	-0.13996	-0.01319	0.06241	-0.1119	0.13112	-0.01148	0.02458	0.00974												865.8	-0.00729444	-0.1178	-0.0267913	0.0618713	-0.105911	0.143662	-0.0154592	0.0340013	0.00528738
867.9	-0.8325	-0.7608	-8.8623	-7.3694	1.4749	-2.9622	0.4947	-0.7336	-0.7729		867.9	0.07288	-0.07997	0.01733	0.0692	-0.11328	0.15092	0.00596	-0.00588	0.02688												867.9	0.0518956	-0.0578103	0.00372871	0.0686613	-0.107291	0.163462	0.00198081	0.00354133	0.0224274
870	-0.7774	-0.7806	-8.9013	-7.3752	1.4737	-2.9743	0.4997	-0.7043	-0.7766		870	0.12786	-0.10118	-0.02134	0.06318	-0.11465	0.13792	0.01099	0.02345	0.02313												870	0.106876	-0.0790203	-0.0349413	0.0626413	-0.108661	0.150462	0.00701081	0.0328713	0.0186774
872.1	-0.7118	-0.7846	-8.9064	-7.3531	1.5119	-2.9634	0.481	-0.6712	-0.7987		872.1	0.19334	-0.10658	-0.02611	0.08507	-0.07662	0.14793	-0.00768	0.05658	0.000978784												872.1	0.172356	-0.0844203	-0.0397113	0.0845313	-0.0706311	0.160472	-0.0116592	0.0660013	-0.00347384
874.2	-0.7351	-0.7806	-8.8674	-7.3857	1.4922	-2.9646	0.4761	-0.675	-0.7766		874.2	0.16993	-0.10399	0.01321	0.05226	-0.09649	0.14583	-0.01254	0.05282	0.02303												874.2	0.148946	-0.0818303	-0.00039129	0.0517213	-0.0905011	0.158372	-0.0165192	0.0622413	0.0185774
876.3	-0.7944	-0.7766	-8.8938	-7.3892	1.4564	-2.9292	0.4947	-0.7183	-0.768		876.3	0.11051	-0.1014	-0.01286	0.04854	-0.13246	0.18033	0.00609	0.00955	0.03157												876.3	0.0895256	-0.0792403	-0.0264613	0.0480013	-0.126471	0.192872	0.00211081	0.0189713	0.0271174
878.4	-0.8283	-0.7905	-8.8875	-7.388	1.4601	-2.9658	0.5022	-0.7604	-0.7803		878.4	0.0765	-0.11671	-0.00623	0.04953	-0.12893	0.14283	0.01363	-0.03252	0.01922												878.4	0.0555156	-0.0945503	-0.0198313	0.0489913	-0.122941	0.155372	0.00965081	-0.0230987	0.0147674
880.5	-0.8325	-0.7964	-8.9089	-7.3799	1.4589	-2.9561	0.5034	-0.7349	-0.7901		880.5	0.07218	-0.12401	-0.02731	0.05741	-0.1303	0.15163	0.01486	-0.00698	0.00937												880.5	0.0511956	-0.10185	-0.0409113	0.0568713	-0.124311	0.164172	0.0108808	0.00244133	0.00491738
882.6	-0.8156	-0.8143	-8.9114	-7.3799	1.4823	-2.967	0.5034	-0.6776	-0.8135		882.6	0.08897	-0.14332	-0.02948	0.0572	-0.10708	0.13983	0.01489	0.05035	-0.01408												882.6	0.0679856	-0.12116	-0.0430813	0.0566613	-0.101091	0.152372	0.0109108	0.0597713	-0.0185326
884.7	-0.8463	-0.7786	-8.8975	-7.3857	1.5008	-2.9804	0.5022	-0.7362	-0.8036		884.7	0.05815	-0.10903	-0.01525	0.05119	-0.08875	0.12553	0.01373	-0.00822	-0.00424												884.7	0.0371656	-0.0868703	-0.0288513	0.0506513	-0.0827611	0.138072	0.00975081	0.00120133	-0.00869262
886.8	-0.9077	-0.8123	-8.9038	-7.3775	1.4329	-2.9609	0.5258	-0.7285	-0.779		886.8	-0.00337	-0.14413	-0.02123	0.05917	-0.15682	0.14413	0.03736	-0.000481373	0.02031												886.8	-0.0243544	-0.12197	-0.0348313	0.0586313	-0.150831	0.156672	0.0333808	0.00893996	0.0158574
888.9	-0.9575	-0.8381	-8.9164	-7.4066	1.4342	-2.9622	0.5196	-0.7311	-0.7631		888.9	-0.05328	-0.17134	-0.0335	0.02986	-0.15569	0.14193	0.03119	-0.00305	0.03616												888.9	-0.0742644	-0.14918	-0.0471013	0.0293213	-0.149701	0.154472	0.0272108	0.00637133	0.0317074
891	-0.9353	-0.8381	-8.9101	-7.3927	1.4478	-2.9817	0.4947	-0.6814	-0.8024		891	-0.0312	-0.17275	-0.02687	0.04355	-0.14226	0.12154	0.00633	0.04669	-0.00319												891	-0.0521844	-0.15059	-0.0404713	0.0430113	-0.136271	0.134082	0.00235081	0.0561113	-0.00764262
893.1	-0.9554	-0.9133	-8.9365	-7.3647	1.4737	-2.9756	0.4723	-0.7018	-0.7926		893.1	-0.05141	-0.24935	-0.05295	0.07133	-0.11653	0.12674	-0.01604	0.02632	0.00655												893.1	-0.0723944	-0.22719	-0.0665513	0.0707913	-0.110541	0.139282	-0.0200192	0.0357413	0.00209738
895.2	-0.9384	-0.8598	-8.9202	-7.3601	1.4576	-2.9999	0.4873	-0.6967	-0.7913		895.2	-0.03453	-0.19726	-0.03632	0.07572	-0.1328	0.10154	-0.00101	0.03145	0.0078												895.2	-0.0555144	-0.1751	-0.0499213	0.0751813	-0.126811	0.114082	-0.00498919	0.0408713	0.00334738
897.3	-0.8738	-0.7885	-8.9101	-7.3589	1.444	-2.9902	0.481	-0.754	-0.7692		897.3	0.02996	-0.12737	-0.02589	0.07671	-0.14658	0.11034	-0.00727	-0.02581	0.02985												897.3	0.00897556	-0.10521	-0.0394913	0.0761713	-0.140591	0.122882	-0.0112492	-0.0163887	0.0253974
899.4	-0.7976	-0.7509	-8.9252	-7.3601	1.4354	-2.978	0.4761	-0.7209	-0.779		899.4	0.10604	-0.09117	-0.04067	0.07529	-0.15535	0.12164	-0.01214	0.00732	0.01999												899.4	0.0850556	-0.0690103	-0.0542713	0.0747513	-0.149361	0.134182	-0.0161192	0.0167413	0.0155374
901.5	-0.7086	-0.7647	-8.9139	-7.3857	1.4403	-2.9548	0.5109	-0.6916	-0.7864		901.5	0.19492	-0.10638	-0.02904	0.04948	-0.15062	0.14394	0.0227	0.03665	0.01254												901.5	0.173936	-0.0842203	-0.0426413	0.0489413	-0.144631	0.156482	0.0187208	0.0460713	0.00808738
903.6	-0.662	-0.7707	-8.9139	-7.3996	1.4601	-2.9695	0.4798	-0.6738	-0.8085		903.6	0.24141	-0.11379	-0.02871	0.03536	-0.13099	0.12834	-0.00837	0.05449	-0.00961												903.6	0.220426	-0.0916303	-0.0423113	0.0348213	-0.125001	0.140882	-0.0123492	0.0639113	-0.0140626
905.7	-0.7234	-0.8143	-8.9114	-7.3706	1.4552	-2.9634	0.4885	-0.7171	-0.7815		905.7	0.17989	-0.15879	-0.02588	0.06415	-0.13606	0.13354	0.000363072	0.01122	0.01734												905.7	0.158906	-0.13663	-0.0394813	0.0636113	-0.130071	0.146082	-0.00361611	0.0206413	0.0128874
907.8	-0.7764	-0.7826	-8.9214	-7.3659	1.4292	-2.9414	0.5034	-0.7349	-0.7692		907.8	0.12678	-0.1285	-0.03556	0.06864	-0.16223	0.15464	0.0153	-0.00654	0.02958												907.8	0.105796	-0.10634	-0.0491613	0.0681013	-0.156241	0.167182	0.0113208	0.00288133	0.0251274
909.9	-0.8378	-0.7509	-8.9001	-7.4124	1.4255	-2.967	0.481	-0.7209	-0.779		909.9	0.06526	-0.09821	-0.01393	0.02192	-0.16611	0.12815	-0.00707	0.00749	0.01973												909.9	0.0442756	-0.0760503	-0.0275313	0.0213813	-0.160121	0.140692	-0.0110492	0.0169113	0.0152774
912	-0.912	-0.7628	-8.9051	-7.3985	1.4391	-2.9951	0.5009	-0.6891	-0.811		912	-0.00905	-0.11151	-0.0186	0.03561	-0.15268	0.09915	0.01286	0.03932	-0.01232												912	-0.0300344	-0.0893503	-0.0322013	0.0350713	-0.146691	0.111692	0.00888081	0.0487413	-0.0167726
914.1	-0.9469	-0.7865	-8.895	-7.3938	1.4379	-2.9902	0.4612	-0.6852	-0.7926		914.1	-0.04407	-0.13662	-0.00818	0.0401	-0.15405	0.10315	-0.0268	0.04326	0.00603												914.1	-0.0650544	-0.11446	-0.0217813	0.0395613	-0.148061	0.115692	-0.0307792	0.0526813	0.00157738
916.2	-1.0094	-0.7192	-8.895	-7.3764	1.4576	-2.9682	0.4686	-0.7158	-0.7729		916.2	-0.10669	-0.07073	-0.00785	0.05728	-0.13452	0.12425	-0.01937	0.01269	0.02567												916.2	-0.127674	-0.0485703	-0.0214513	0.0567413	-0.128531	0.136792	-0.0233492	0.0221113	0.0212174
918.3	-1.0136	-0.7251	-8.939	-7.3787	1.4342	-2.9561	0.4947	-0.7489	-0.7938		918.3	-0.111	-0.07803	-0.05152	0.05477	-0.15809	0.13545	0.00676	-0.02038	0.00472												918.3	-0.131984	-0.0558703	-0.0651213	0.0542313	-0.152101	0.147992	0.00278081	-0.0109587	0.00026738
920.4	-0.9564	-0.7271	-8.9001	-7.4136	1.4342	-2.9597	0.4699	-0.7018	-0.8135		920.4	-0.05392	-0.08144	-0.0123	0.01965	-0.15826	0.13095	-0.018	0.02676	-0.01503												920.4	-0.0749044	-0.0592803	-0.0259013	0.0191113	-0.152271	0.143492	-0.0219792	0.0361813	-0.0194826
922.5	-0.8897	-0.7588	-8.9252	-7.402	1.4761	-2.9536	0.4711	-0.6661	-0.7938		922.5	0.01267	-0.11455	-0.03707	0.03104	-0.11653	0.13615	-0.01677	0.06249	0.00462												922.5	-0.00831444	-0.0923903	-0.0506713	0.0305013	-0.110541	0.148692	-0.0207492	0.0719113	0.00016738
924.6	-0.8124	-0.7311	-8.9265	-7.3671	1.5119	-2.9743	0.4686	-0.6891	-0.8184		924.6	0.08985	-0.08825	-0.03804	0.06573	-0.08091	0.11455	-0.01923	0.03952	-0.02004												924.6	0.0688656	-0.0660903	-0.0516413	0.0651913	-0.0749211	0.127092	-0.0232092	0.0489413	-0.0244926
926.7	-0.7986	-0.6835	-8.9315	-7.3857	1.4638	-2.9768	0.4661	-0.74	-0.7901		926.7	0.10354	-0.04206	-0.04272	0.04691	-0.12918	0.11115	-0.0217	-0.01134	0.00821												926.7	0.0825556	-0.0199003	-0.0563213	0.0463713	-0.123191	0.123692	-0.0256792	-0.00191867	0.00375738
928.8	-0.7499	-0.6776	-8.8887	-7.3647	1.4083	-2.9695	0.4835	-0.7082	-0.8049		928.8	0.15212	-0.03757	0.000409717	0.0677	-0.18485	0.11756	-0.00427	0.02049	-0.00664												928.8	0.131136	-0.0154103	-0.0131916	0.0671613	-0.178861	0.130102	-0.00824919	0.0299113	-0.0110926
930.9	-0.6705	-0.6399	-8.9139	-7.3822	1.4132	-3.0012	0.4748	-0.6903	-0.8049		930.9	0.2314	-0.00127	-0.02446	0.04999	-0.18012	0.08496	-0.01293	0.03843	-0.00669												930.9	0.210416	0.0208897	-0.0380613	0.0494513	-0.174131	0.0975022	-0.0169092	0.0478513	-0.0111426
933	-0.6493	-0.6914	-8.9202	-7.3764	1.4515	-3.0182	0.4748	-0.6827	-0.7729		933	0.25249	-0.05418	-0.03044	0.05557	-0.14199	0.06706	-0.0129	0.04606	0.02525												933	0.231506	-0.0320203	-0.0440413	0.0550313	-0.136001	0.0796022	-0.0168792	0.0554813	0.0207974
935.1	-0.7266	-0.638	-8.924	-7.3915	1.4761	-2.9817	0.4624	-0.6827	-0.7864		935.1	0.17507	-0.00219	-0.03391	0.04026	-0.11756	0.10266	-0.02527	0.04609	0.0117												935.1	0.154086	0.0199697	-0.0475113	0.0397213	-0.111571	0.115202	-0.0292492	0.0555113	0.00724738
937.2	-0.7817	-0.6162	-8.929	-7.3775	1.449	-3.0024	0.4462	-0.7056	-0.7864		937.2	0.11986	0.0182	-0.03858	0.05405	-0.14484	0.08106	-0.04143	0.02323	0.01165												937.2	0.0988756	0.0403597	-0.0521813	0.0535113	-0.138851	0.0936022	-0.0454092	0.0326513	0.00719738
939.3	-0.8368	-0.6617	-8.9064	-7.3996	1.4366	-2.9609	0.4736	-0.7082	-0.7975		939.3	0.06464	-0.0287	-0.01566	0.03173	-0.15741	0.12166	-0.014	0.02066	0.00049543												939.3	0.0436556	-0.00654032	-0.0292613	0.0311913	-0.151421	0.134202	-0.0179792	0.0300813	-0.00395719
941.4	-0.8982	-0.7152	-8.9001	-7.3845	1.4453	-2.9719	0.4525	-0.6508	-0.8012		941.4	0.00313	-0.08361	-0.00903	0.04662	-0.14888	0.10976	-0.03507	0.07809	-0.00326												941.4	-0.0178544	-0.0614503	-0.0226313	0.0460813	-0.142891	0.122302	-0.0390492	0.0875113	-0.00771262
943.5	-0.9522	-0.6914	-8.9114	-7.3717	1.4515	-2.9914	0.4475	-0.6445	-0.8282		943.5	-0.05099	-0.06122	-0.02	0.0592	-0.14285	0.08936	-0.04003	0.08443	-0.03031												943.5	-0.0719744	-0.0390603	-0.0336013	0.0586613	-0.136861	0.101902	-0.0440092	0.0938513	-0.0347626
945.6	-1.0221	-0.6518	-8.8938	-7.3775	1.4021	-2.9536	0.4674	-0.6878	-0.8049		945.6	-0.12101	-0.02302	-0.00208	0.05319	-0.19242	0.12626	-0.0201	0.04116	-0.00706												945.6	-0.141994	-0.000860321	-0.0156813	0.0526513	-0.186431	0.138802	-0.0240792	0.0505813	-0.0115126
947.7	-1.0634	-0.6538	-8.9038	-7.3601	1.3897	-2.9487	0.4351	-0.7145	-0.8147		947.7	-0.16242	-0.02643	-0.01175	0.07038	-0.20499	0.13027	-0.05236	0.0145	-0.01691												947.7	-0.183404	-0.00427032	-0.0253513	0.0698413	-0.199001	0.142812	-0.0563392	0.0239213	-0.0213626
949.8	-1.056	-0.6895	-8.9101	-7.3578	1.3922	-2.9658	0.4413	-0.6992	-0.8343		949.8	-0.15514	-0.06354	-0.01772	0.07246	-0.20266	0.11227	-0.04613	0.02983	-0.03657												949.8	-0.176124	-0.0413803	-0.0313213	0.0719213	-0.196671	0.124812	-0.0501092	0.0392513	-0.0410226
951.9	-1.0115	-0.7053	-8.9126	-7.3717	1.4403	-2.9695	0.4201	-0.6801	-0.8049		951.9	-0.11075	-0.08074	-0.0199	0.05835	-0.15474	0.10767	-0.0673	0.04896	-0.00722												951.9	-0.131734	-0.0585803	-0.0335013	0.0578113	-0.148751	0.120212	-0.0712792	0.0583813	-0.0116726
954	-0.912	-0.7172	-8.89	-7.3403	1.4897	-2.9719	0.4773	-0.6712	-0.8208		954	-0.01137	-0.09405	0.00303	0.08954	-0.10551	0.10437	-0.01006	0.0579	-0.02317												954	-0.0323544	-0.0718903	-0.0105713	0.0890013	-0.0995211	0.116912	-0.0140392	0.0673213	-0.0276226
956.1	-0.8548	-0.7093	-8.9139	-7.3484	1.4638	-2.9341	0.481	-0.7171	-0.7876		956.1	0.04572	-0.08756	-0.02054	0.08122	-0.13158	0.14127	-0.00633	0.01203	0.00997												956.1	0.0247356	-0.0654003	-0.0341413	0.0806813	-0.125591	0.153812	-0.0103092	0.0214513	0.00551738
958.2	-0.7499	-0.6835	-8.9227	-7.3415	1.4354	-2.9548	0.4587	-0.7234	-0.7975		958.2	0.1505	-0.06316	-0.02902	0.08791	-0.16015	0.11967	-0.0286	0.00576	2.19873e-05												958.2	0.129516	-0.0410003	-0.0426213	0.0873713	-0.154161	0.132212	-0.0325792	0.0151813	-0.00443063
960.3	-0.6885	-0.6637	-8.9378	-7.3543	1.4231	-2.9756	0.4736	-0.6801	-0.8049		960.3	0.21178	-0.04477	-0.04379	0.0749	-0.17262	0.09797	-0.01366	0.0491	-0.00743												960.3	0.190796	-0.0226103	-0.0573913	0.0743613	-0.166631	0.110512	-0.0176392	0.0585213	-0.0118826
962.4	-0.6556	-0.6538	-8.9491	-7.3799	1.47	-2.9926	0.4599	-0.6483	-0.7827		962.4	0.24457	-0.03628	-0.05476	0.04908	-0.12589	0.08007	-0.02733	0.08093	0.01472												962.4	0.223586	-0.0141203	-0.0683613	0.0485413	-0.119901	0.0926122	-0.0313092	0.0903513	0.0102674
964.5	-0.6683	-0.6895	-8.9592	-7.3938	1.4872	-2.9634	0.4152	-0.6827	-0.7815		964.5	0.23175	-0.07338	-0.06454	0.03497	-0.10886	0.10837	-0.07199	0.04656	0.01586												964.5	0.210766	-0.0512203	-0.0781413	0.0344313	-0.102871	0.120912	-0.0759692	0.0559813	0.0114074
966.6	-0.7372	-0.638	-8.9441	-7.3822	1.4403	-2.9658	0.4375	-0.726	-0.7938		966.6	0.16274	-0.02329	-0.04911	0.04635	-0.15594	0.10508	-0.04966	0.0033	0.00351												966.6	0.141756	-0.00113032	-0.0627113	0.0458113	-0.149951	0.117622	-0.0536392	0.0127213	-0.00094262
968.7	-0.8293	-0.6518	-8.9466	-7.3892	1.4329	-2.9756	0.4612	-0.7336	-0.795		968.7	0.07052	-0.0385	-0.05128	0.03914	-0.16351	0.09438	-0.02593	-0.00427	0.00226												968.7	0.0495356	-0.0163403	-0.0648813	0.0386013	-0.157521	0.106922	-0.0299092	0.00515133	-0.00219262
970.8	-0.8632	-0.6835	-8.9265	-7.381	1.4934	-2.9768	0.4624	-0.7056	-0.7803		970.8	0.03651	-0.0716	-0.03085	0.04713	-0.10318	0.09228	-0.02469	0.02377	0.01691												970.8	0.0155256	-0.0494403	-0.0444513	0.0465913	-0.0971911	0.104822	-0.0286692	0.0331913	0.0124574
972.9	-0.9162	-0.6696	-8.9416	-7.3764	1.4774	-2.9622	0.4487	-0.6623	-0.7876		972.9	-0.01661	-0.05911	-0.04563	0.05151	-0.11935	0.10598	-0.03836	0.0671	0.00955												972.9	-0.0375944	-0.0369503	-0.0592313	0.0509713	-0.113361	0.118522	-0.0423392	0.0765213	0.00509738
975	-0.9628	-0.628	-8.9089	-7.381	1.4922	-2.9573	0.445	-0.7043	-0.8098		975	-0.06333	-0.01892	-0.0126	0.0467	-0.10472	0.10998	-0.04203	0.02513	-0.0127												975	-0.0843144	0.00323968	-0.0262013	0.0461613	-0.0987311	0.122522	-0.0460092	0.0345513	-0.0171526
977.1	-0.9744	-0.638	-8.9189	-7.3787	1.4428	-2.9475	0.4674	-0.7413	-0.8184		977.1	-0.07504	-0.03032	-0.02227	0.04879	-0.15429	0.11888	-0.01959	-0.01183	-0.02135												977.1	-0.0960244	-0.00816032	-0.0358713	0.0482513	-0.148301	0.131422	-0.0235692	-0.00240867	-0.0258026
979.2	-0.9437	-0.638	-8.9051	-7.3659	1.4428	-2.9353	0.4823	-0.7145	-0.8061		979.2	-0.04446	-0.03173	-0.00815	0.06137	-0.15447	0.13018	-0.00466	0.015	-0.0091												979.2	-0.0654444	-0.00957032	-0.0217513	0.0608313	-0.148481	0.142722	-0.00863919	0.0244213	-0.0135526
981.3	-0.8929	-0.743	-8.924	-7.3996	1.4428	-2.9548	0.4363	-0.6649	-0.8061		981.3	0.00623	-0.13814	-0.02672	0.02746	-0.15464	0.10978	-0.05063	0.06463	-0.00916												981.3	-0.0147544	-0.11598	-0.0403213	0.0269213	-0.148651	0.122322	-0.0546092	0.0740513	-0.0136126
983.4	-0.8399	-0.6696	-8.924	-7.3531	1.449	-2.9622	0.4624	-0.661	-0.8196		983.4	0.05911	-0.06614	-0.02639	0.07375	-0.14861	0.10148	-0.02449	0.06857	-0.02271												983.4	0.0381256	-0.0439803	-0.0399913	0.0732113	-0.142621	0.114022	-0.0284692	0.0779913	-0.0271626
985.5	-0.8717	-0.638	-8.9089	-7.3519	1.4638	-2.9573	0.4512	-0.7069	-0.7962		985.5	0.0272	-0.03595	-0.01097	0.07473	-0.13398	0.10548	-0.03566	0.0227	0.000638125												985.5	0.00621556	-0.0137903	-0.0245713	0.0741913	-0.127991	0.118022	-0.0396392	0.0321213	-0.0038145
987.6	-0.8399	-0.6181	-8.9353	-7.3391	1.4268	-2.9329	0.4674	-0.7311	-0.7913		987.6	0.05888	-0.01746	-0.03704	0.08732	-0.17115	0.12899	-0.01942	-0.00147	0.00549												987.6	0.0378956	0.00469968	-0.0506413	0.0867813	-0.165161	0.141532	-0.0233992	0.00795133	0.00103738
989.7	-0.7954	-0.636	-8.9064	-7.3578	1.4157	-2.9426	0.4674	-0.6929	-0.7729		989.7	0.10326	-0.03677	-0.00781	0.0684	-0.18242	0.11839	-0.01939	0.03677	0.02383												989.7	0.0822756	-0.0146103	-0.0214113	0.0678613	-0.176431	0.130932	-0.0233692	0.0461913	0.0193774
991.8	-0.733	-0.632	-8.9466	-7.3892	1.4539	-2.9341	0.4612	-0.6598	-0.8233		991.8	0.16555	-0.03417	-0.04769	0.03679	-0.14439	0.12599	-0.02556	0.0699	-0.02662												991.8	0.144566	-0.0120103	-0.0612913	0.0362513	-0.138401	0.138532	-0.0295392	0.0793213	-0.0310726
993.9	-0.7361	-0.6003	-8.9453	-7.3601	1.4724	-2.9366	0.4624	-0.6738	-0.8147		993.9	0.16233	-0.00388	-0.04606	0.06568	-0.12607	0.12259	-0.02432	0.05594	-0.01807												993.9	0.141346	0.0182797	-0.0596613	0.0651413	-0.120081	0.135132	-0.0282992	0.0653613	-0.0225226
996	-0.7277	-0.5765	-8.9214	-7.3484	1.4206	-2.9378	0.4537	-0.7133	-0.7962		996	0.17062	0.01851	-0.02183	0.07716	-0.17804	0.12049	-0.03299	0.01647	0.000375101												996	0.149636	0.0406697	-0.0354313	0.0766213	-0.172051	0.133032	-0.0369692	0.0258913	-0.00407752
998.1	-0.752	-0.5488	-8.9365	-7.3647	1.4132	-2.9268	0.4649	-0.7387	-0.8122		998.1	0.1462	0.04481	-0.03661	0.06065	-0.18561	0.13059	-0.02176	-0.0089	-0.01568												998.1	0.125216	0.0669697	-0.0502113	0.0601113	-0.179621	0.143132	-0.0257392	0.000521334	-0.0201326
1000.2	-0.7891	-0.5587	-8.9064	-7.381	1.412	-2.939	0.45	-0.6967	-0.8049		1000.2	0.10898	0.0335	-0.00618	0.04414	-0.18698	0.11749	-0.03662	0.03314	-0.00843												1000.2	0.0879956	0.0556597	-0.0197813	0.0436013	-0.180991	0.130032	-0.0405992	0.0425613	-0.0128826
1002.3	-0.8283	-0.5983	-8.9365	-7.4252	1.4687	-2.9487	0.4512	-0.6929	-0.8049		1002.3	0.06967	-0.00751	-0.03595	-0.00027765	-0.13045	0.10689	-0.03539	0.03697	-0.00848												1002.3	0.0486856	0.0146497	-0.0495513	-0.000816373	-0.124461	0.119432	-0.0393692	0.0463913	-0.0129326
1004.4	-0.895	-0.5746	-8.9164	-7.3845	1.4712	-2.95	0.4388	-0.7031	-0.779		1004.4	0.00285	0.01479	-0.01553	0.04021	-0.12812	0.10469	-0.04776	0.0268	0.01736												1004.4	-0.0181344	0.0369497	-0.0291313	0.0396713	-0.122131	0.117232	-0.0517392	0.0362213	0.0129074
1006.5	-0.9374	-0.5607	-8.9114	-7.3601	1.444	-2.9305	0.4686	-0.7387	-0.7901		1006.5	-0.03966	0.02728	-0.0102	0.0644	-0.1555	0.1233	-0.01792	-0.00876	0.00621												1006.5	-0.0606444	0.0494397	-0.0238013	0.0638613	-0.149511	0.135842	-0.0218992	0.000661334	0.00175738
1008.6	-0.9501	-0.5329	-8.9227	-7.381	1.4465	-2.9426	0.4525	-0.7145	-0.7876		1008.6	-0.05248	0.05367	-0.02117	0.04328	-0.15317	0.1103	-0.03399	0.01547	0.00866												1008.6	-0.0734644	0.0758297	-0.0347713	0.0427413	-0.147181	0.122842	-0.0379692	0.0248913	0.00420738
1010.7	-0.9014	-0.5706	-8.9126	-7.3985	1.4206	-2.9707	0.44	-0.6992	-0.784		1010.7	-0.00389	0.01457	-0.01075	0.02557	-0.17924	0.0813	-0.04645	0.03081	0.01221												1010.7	-0.0248744	0.0367297	-0.0243513	0.0250313	-0.173251	0.0938422	-0.0504292	0.0402313	0.00775738
1012.8	-0.859	-0.5963	-8.9126	-7.4148	1.4823	-2.9585	0.4201	-0.6929	-0.7999		1012.8	0.03839	-0.01254	-0.01042	0.00905	-0.11771	0.0926	-0.06632	0.03714	-0.00375												1012.8	0.0174056	0.00961968	-0.0240213	0.00851128	-0.111721	0.105142	-0.0702992	0.0465613	-0.00820262
1014.9	-0.8325	-0.5785	-8.9076	-7.4217	1.4749	-2.9622	0.4388	-0.7145	-0.7889		1014.9	0.06477	0.00385	-0.00509	0.00194	-0.12528	0.088	-0.04759	0.01557	0.0072												1014.9	0.0437856	0.0260097	-0.0186913	0.00140128	-0.119291	0.100542	-0.0515692	0.0249913	0.00274738
1017	-0.8018	-0.5012	-8.8737	-7.4043	1.4428	-2.9366	0.4612	-0.7298	-0.7643		1017	0.09536	0.07975	0.02913	0.01913	-0.15755	0.1127	-0.02515	0.000306056	0.03175												1017	0.0743756	0.10191	0.0155287	0.0185913	-0.151561	0.125242	-0.0291292	0.00972739	0.0272974
1019.1	-0.7531	-0.5092	-8.8963	-7.3938	1.4231	-2.9414	0.4922	-0.6941	-0.7827		1019.1	0.14394	0.07034	0.00686	0.02941	-0.17742	0.107	0.00588	0.03604	0.0133												1019.1	0.122956	0.0924997	-0.00674129	0.0288713	-0.171431	0.119542	0.00190081	0.0454613	0.00884738
1021.2	-0.7478	-0.5349	-8.8925	-7.4113	1.4329	-2.9731	0.4823	-0.6865	-0.7889		1021.2	0.14913	0.04323	0.01099	0.0117	-0.1678	0.0744	-0.00399	0.04367	0.00704												1021.2	0.128146	0.0653897	-0.00261129	0.0111613	-0.161811	0.0869422	-0.00796919	0.0530913	0.00258738
1023.3	-0.7965	-0.5864	-8.9164	-7.395	1.449	-2.9914	0.4947	-0.6865	-0.7594		1023.3	0.10031	-0.00967	-0.01259	0.02779	-0.15187	0.0552	0.00845	0.04371	0.03649												1023.3	0.0793256	0.0124897	-0.0261913	0.0272513	-0.145881	0.0677422	0.00447081	0.0531313	0.0320374
1025.4	-0.8918	-0.4913	-8.9114	-7.4194	1.4798	-3.0048	0.4922	-0.7107	-0.7827		1025.4	0.0049	0.08402	-0.00726	0.00317	-0.12124	0.04091	0.00598	0.01954	0.01314												1025.4	-0.0160844	0.10618	-0.0208613	0.00263128	-0.115251	0.0534522	0.00200081	0.0289613	0.00868738
1027.5	-0.9723	-0.5409	-8.9277	-7.3752	1.4613	-2.9646	0.5047	-0.7082	-0.7545		1027.5	-0.07572	0.03301	-0.02323	0.04716	-0.13991	0.08021	0.01851	0.02207	0.04129												1027.5	-0.0967044	0.0551697	-0.0368313	0.0466213	-0.133921	0.0927522	0.0145308	0.0314913	0.0368374
1029.6	-0.9819	-0.5171	-8.8938	-7.345	1.449	-2.9841	0.496	-0.7425	-0.7446		1029.6	-0.08544	0.05541	0.01099	0.07714	-0.15238	0.05981	0.00985	-0.01219	0.05113												1029.6	-0.106424	0.0775697	-0.00261129	0.0766013	-0.146391	0.0723522	0.00587081	-0.00276867	0.0466774
1031.7	-0.9522	-0.5607	-8.9516	-7.4252	1.4317	-2.9804	0.4748	-0.7005	-0.7582		1031.7	-0.05585	0.0104	-0.04648	-0.00327	-0.16985	0.06261	-0.01132	0.02984	0.03748												1031.7	-0.0768344	0.0325597	-0.0600813	-0.00380872	-0.163861	0.0751522	-0.0152992	0.0392613	0.0330274
1033.8	-0.8918	-0.5389	-8.9403	-7.4241	1.4626	-2.989	0.4649	-0.6827	-0.7815		1033.8	0.00443	0.03079	-0.03485	-0.00238	-0.13912	0.05311	-0.02118	0.04768	0.01413												1033.8	-0.0165544	0.0529497	-0.0484513	-0.00291872	-0.133131	0.0656522	-0.0251592	0.0571013	0.00967738
1035.9	-0.8897	-0.5329	-8.9378	-7.3717	1.4218	-2.9609	0.4438	-0.7133	-0.7643		1035.9	0.00642	0.03539	-0.03203	0.0498	-0.1801	0.08031	-0.04225	0.01711	0.03128												1035.9	-0.0145644	0.0575497	-0.0456313	0.0492613	-0.174111	0.0928522	-0.0462292	0.0265313	0.0268274
1038	-0.8484	-0.5131	-8.9101	-7.3589	1.4181	-2.939	0.4711	-0.7527	-0.7446		1038	0.0476	0.05378	-0.004	0.06239	-0.18397	0.10131	-0.01492	-0.02226	0.05092												1038	0.0266156	0.0759397	-0.0176013	0.0618513	-0.177981	0.113852	-0.0188992	-0.0128387	0.0464674
1040.1	-0.7891	-0.5785	-8.9076	-7.3903	1.4317	-2.9597	0.5208	-0.6992	-0.7704		1040.1	0.10679	-0.01303	-0.00117	0.03078	-0.17054	0.07971	0.03482	0.03128	0.02507												1040.1	0.0858056	0.00912968	-0.0147713	0.0302413	-0.164551	0.0922522	0.0308408	0.0407013	0.0206174
1042.2	-0.7923	-0.5547	-8.9302	-7.3996	1.4366	-2.967	0.4537	-0.6789	-0.7852		1042.2	0.10347	0.00936	-0.02344	0.02126	-0.16581	0.07151	-0.03225	0.05161	0.01022												1042.2	0.0824856	0.0315197	-0.0370413	0.0207213	-0.159821	0.0840522	-0.0362292	0.0610313	0.00576738
1044.3	-0.7944	-0.5944	-8.9302	-7.4136	1.4687	-2.9829	0.4649	-0.6865	-0.7717		1044.3	0.10125	-0.03174	-0.02312	0.00705	-0.13388	0.05472	-0.02102	0.04404	0.02367												1044.3	0.0802656	-0.00958032	-0.0367213	0.00651128	-0.127891	0.0672622	-0.0249992	0.0534613	0.0192174
1046.4	-0.806	-0.5528	-8.924	-7.3996	1.4292	-2.9634	0.4748	-0.7183	-0.7557		1046.4	0.08954	0.00845	-0.01659	0.02084	-0.17355	0.07332	-0.01108	0.01228	0.03961												1046.4	0.0685556	0.0306097	-0.0301913	0.0203013	-0.167561	0.0858622	-0.0150592	0.0217013	0.0351574
1048.5	-0.7838	-0.5448	-8.9768	-7.402	1.4021	-2.9414	0.5146	-0.7324	-0.7373		1048.5	0.11162	0.01504	-0.06906	0.01822	-0.20083	0.09442	0.02875	-0.00179	0.05796												1048.5	0.0906356	0.0371997	-0.0826613	0.0176813	-0.194841	0.106962	0.0247708	0.00763133	0.0535074
1050.6	-0.7446	-0.5607	-8.9554	-7.4066	1.4181	-2.9682	0.5059	-0.6954	-0.725		1050.6	0.15071	-0.00226	-0.04734	0.01341	-0.185	0.06672	0.02008	0.03524	0.07021												1050.6	0.129726	0.0198997	-0.0609413	0.0128713	-0.179011	0.0792622	0.0161008	0.0446613	0.0657574
1052.7	-0.7266	-0.5389	-8.9189	-7.4043	1.4576	-2.9524	0.4885	-0.6878	-0.7655		1052.7	0.16859	0.01813	-0.01051	0.01549	-0.14567	0.08162	0.00272	0.04288	0.02965												1052.7	0.147606	0.0402897	-0.0241113	0.0149513	-0.139681	0.0941622	-0.00125919	0.0523013	0.0251974
1054.8	-0.7679	-0.4755	-8.9189	-7.3857	1.4798	-2.9743	0.4599	-0.7425	-0.7754		1054.8	0.12718	0.08012	-0.01018	0.03388	-0.12364	0.05882	-0.02585	-0.01179	0.0197												1054.8	0.106196	0.10228	-0.0237813	0.0333413	-0.117651	0.0713622	-0.0298292	-0.00236867	0.0152474
1056.9	-0.8315	-0.4953	-8.9315	-7.3787	1.4478	-2.9865	0.4972	-0.7578	-0.7606		1056.9	0.06346	0.05892	-0.02246	0.04067	-0.15581	0.04572	0.01149	-0.02705	0.03445												1056.9	0.0424756	0.0810797	-0.0360613	0.0401313	-0.149821	0.0582622	0.00751081	-0.0176287	0.0299974
1059	-0.895	-0.525	-8.9328	-7.3973	1.4268	-2.9804	0.4748	-0.7451	-0.7827		1059	-0.000155472	0.02781	-0.02343	0.02185	-0.17698	0.05092	-0.01088	-0.01432	0.0123												1059	-0.0211399	0.0499697	-0.0370313	0.0213113	-0.170991	0.0634622	-0.0148592	-0.00489867	0.00784738
1061.1	-0.8844	-0.5607	-8.9013	-7.3938	1.4465	-2.9634	0.4723	-0.7082	-0.7741		1061.1	0.01033	-0.0093	0.0084	0.02514	-0.15745	0.06702	-0.01335	0.02261	0.02084												1061.1	-0.0106544	0.0128597	-0.00520129	0.0246013	-0.151461	0.0795622	-0.0173292	0.0320313	0.0163874
1063.2	-0.9056	-0.5904	-8.9089	-7.4357	1.4798	-2.9597	0.4587	-0.684	-0.7508		1063.2	-0.01099	-0.0404	0.00112	-0.01697	-0.12433	0.06983	-0.02691	0.04685	0.04409												1063.2	-0.0319744	-0.0182403	-0.0124813	-0.0175087	-0.118341	0.0823722	-0.0308892	0.0562713	0.0396374
1065.3	-0.9395	-0.5211	-8.9089	-7.4182	1.4552	-2.9768	0.486	-0.7362	-0.795		1065.3	-0.045	0.02749	0.00145	0.000312697	-0.1491	0.05183	0.00041985	-0.00532	-0.000160857												1065.3	-0.0659844	0.0496497	-0.0121513	-0.000226026	-0.143111	0.0643722	-0.00355934	0.00410133	-0.00461348
1067.4	-0.8717	-0.4973	-8.9013	-7.4078	1.4403	-2.9512	0.4711	-0.7438	-0.7483		1067.4	0.02268	0.04988	0.00938	0.0105	-0.16417	0.07653	-0.01445	-0.01289	0.04649												1067.4	0.00169556	0.0720397	-0.00422129	0.00996128	-0.158181	0.0890722	-0.0184292	-0.00346867	0.0420374
1069.5	-0.8113	-0.527	-8.9302	-7.3845	1.428	-2.9573	0.4487	-0.6954	-0.7643		1069.5	0.08297	0.01878	-0.0192	0.03359	-0.17664	0.06953	-0.03681	0.03555	0.03043												1069.5	0.0619856	0.0409397	-0.0328013	0.0330513	-0.170651	0.0820722	-0.0407892	0.0449713	0.0259774
1071.6	-0.7488	-0.5765	-8.9302	-7.3833	1.4601	-2.9853	0.4786	-0.6649	-0.8159		1071.6	0.14535	-0.03213	-0.01887	0.03457	-0.14471	0.04063	-0.00688	0.06608	-0.02122												1071.6	0.124366	-0.00997032	-0.0324713	0.0340313	-0.138721	0.0531722	-0.0108592	0.0755013	-0.0256726
1073.7	-0.7404	-0.5706	-8.9252	-7.3857	1.4761	-2.9561	0.4736	-0.6916	-0.811		1073.7	0.15363	-0.02764	-0.01354	0.03196	-0.12888	0.06893	-0.01185	0.03942	-0.01637												1073.7	0.132646	-0.00548032	-0.0271413	0.0314213	-0.122891	0.0814722	-0.0158292	0.0488413	-0.0208226
1075.8	-0.7753	-0.4913	-8.9416	-7.3729	1.4478	-2.9451	0.4649	-0.712	-0.8061		1075.8	0.11862	0.05026	-0.02962	0.04454	-0.15736	0.07903	-0.02051	0.01905	-0.01152												1075.8	0.0976356	0.0724197	-0.0432213	0.0440013	-0.151371	0.0915722	-0.0244892	0.0284713	-0.0159726
1077.9	-0.7849	-0.4517	-8.9353	-7.3752	1.4403	-2.9548	0.4388	-0.7527	-0.7852		1077.9	0.1089	0.08845	-0.02299	0.04203	-0.16503	0.06843	-0.04658	-0.02162	0.00932												1077.9	0.0879156	0.11061	-0.0365913	0.0414913	-0.159041	0.0809722	-0.0505592	-0.0121987	0.00486738
1080	-0.8251	-0.4577	-8.9466	-7.381	1.4527	-2.9743	0.4723	-0.7069	-0.7631		1080	0.06859	0.08104	-0.03396	0.03602	-0.1528	0.04803	-0.01304	0.02422	0.03137												1080	0.0476056	0.1032	-0.0475613	0.0354813	-0.146811	0.0605722	-0.0170192	0.0336413	0.0269174
1082.1	-0.8325	-0.5092	-8.9743	-7.3706	1.47	-2.9634	0.4612	-0.6967	-0.8184		1082.1	0.06107	0.02814	-0.06134	0.0462	-0.13567	0.05804	-0.02411	0.03445	-0.02398												1082.1	0.0400856	0.0502997	-0.0749413	0.0456613	-0.129681	0.0705822	-0.0280892	0.0438713	-0.0284326
1084.2	-0.8823	-0.5211	-8.9252	-7.3903	1.4848	-2.9756	0.4624	-0.6789	-0.7901		1084.2	0.01116	0.01483	-0.01191	0.02629	-0.12104	0.04494	-0.02288	0.05228	0.00427												1084.2	-0.00982444	0.0369897	-0.0255113	0.0257513	-0.115051	0.0574822	-0.0268592	0.0617013	-0.00018262
1086.3	-0.8855	-0.4933	-8.9378	-7.3892	1.507	-2.9573	0.5047	-0.7056	-0.7926		1086.3	0.00784	0.04122	-0.02418	0.02718	-0.09901	0.06234	0.01946	0.02562	0.00171												1086.3	-0.0131444	0.0633797	-0.0377813	0.0266413	-0.0930211	0.0748822	0.0154808	0.0350413	-0.00274262
1088.4	-0.9014	-0.4933	-8.9466	-7.4078	1.4638	-2.9646	0.5146	-0.7527	-0.7926		1088.4	-0.00818	0.03982	-0.03266	0.00836	-0.14238	0.05414	0.02939	-0.02145	0.00166												1088.4	-0.0291644	0.0619797	-0.0462613	0.00782128	-0.136391	0.0666822	0.0254108	-0.0120287	-0.00279262
1090.5	-0.8484	-0.5072	-8.9403	-7.4008	1.4835	-2.9658	0.5258	-0.7476	-0.7901		1090.5	0.04471	0.02451	-0.02603	0.01515	-0.12286	0.05204	0.04062	-0.01632	0.00411												1090.5	0.0237256	0.0466697	-0.0396313	0.0146113	-0.116871	0.0645822	0.0366408	-0.00689867	-0.00034262
1092.6	-0.8251	-0.5686	-8.9466	-7.438	1.5107	-2.9561	0.4984	-0.7145	-0.7692		1092.6	0.06789	-0.0383	-0.032	-0.02226	-0.09583	0.06084	0.01326	0.01682	0.02496												1092.6	0.0469056	-0.0161403	-0.0456013	-0.0227987	-0.0898411	0.0733822	0.00928081	0.0262413	0.0205074
1094.7	-0.8505	-0.5131	-8.9541	-7.3961	1.5156	-2.9463	0.4947	-0.7031	-0.7766		1094.7	0.04238	0.0158	-0.03918	0.01942	-0.0911	0.06974	0.00959	0.02825	0.0175												1094.7	0.0213956	0.0379597	-0.0527813	0.0188813	-0.0851111	0.0822822	0.00561081	0.0376713	0.0130474
1096.8	-0.8844	-0.527	-8.9403	-7.3996	1.4959	-2.9573	0.491	-0.7489	-0.7606		1096.8	0.00836	0.000488328	-0.02505	0.01571	-0.11097	0.05784	0.00592	-0.01751	0.03345												1096.8	-0.0126244	0.022648	-0.0386513	0.0151713	-0.104981	0.0703822	0.00194081	-0.00808867	0.0289974
1098.9	-0.8887	-0.5171	-8.9064	-7.4031	1.4749	-2.9426	0.4823	-0.7349	-0.8061		1098.9	0.00395	0.00898	0.00918	0.01199	-0.13214	0.07164	-0.00274	-0.00348	-0.0121												1098.9	-0.0170344	0.0311397	-0.00442129	0.0114513	-0.126151	0.0841822	-0.00671919	0.00594133	-0.0165526
1101	-0.8166	-0.5329	-8.9378	-7.3961	1.4712	-2.9792	0.4835	-0.7171	-0.8049		1101	0.07593	-0.00823	-0.0219	0.01878	-0.13601	0.03415	-0.00151	0.01435	-0.01096												1101	0.0549456	0.0139297	-0.0355013	0.0182413	-0.130021	0.0466922	-0.00548919	0.0237713	-0.0154126
1103.1	-0.7954	-0.5171	-8.9453	-7.4078	1.5021	-2.9402	0.4537	-0.7158	-0.795		1103.1	0.09701	0.00617	-0.02907	0.00687	-0.10528	0.07225	-0.03127	0.01569	-0.00111												1103.1	0.0760256	0.0283297	-0.0426713	0.00633128	-0.0992911	0.0847922	-0.0352492	0.0251113	-0.00556262
1105.2	-0.8283	-0.523	-8.9692	-7.3903	1.523	-2.9426	0.4612	-0.7591	-0.7975		1105.2	0.064	-0.00114	-0.05264	0.02415	-0.08456	0.06895	-0.02374	-0.02758	-0.00366												1105.2	0.0430156	0.0210197	-0.0662413	0.0236113	-0.0785711	0.0814922	-0.0277192	-0.0181587	-0.00811262
1107.3	-0.895	-0.4933	-8.9441	-7.3554	1.4737	-2.9561	0.5059	-0.7655	-0.7643		1107.3	-0.00282	0.02715	-0.02722	0.05884	-0.13403	0.05455	0.02099	-0.03395	0.02949												1107.3	-0.0238044	0.0493097	-0.0408213	0.0583013	-0.128041	0.0670922	0.0170108	-0.0245287	0.0250374
1109.4	-0.9183	-0.5072	-8.9541	-7.395	1.4502	-2.9536	0.481	-0.7336	-0.7655		1109.4	-0.02623	0.01185	-0.03689	0.01903	-0.1577	0.05615	-0.00387	-0.00201	0.02823												1109.4	-0.0472144	0.0340097	-0.0504913	0.0184913	-0.151711	0.0686922	-0.00784919	0.00741133	0.0237774
1111.5	-0.9215	-0.4854	-8.9214	-7.3915	1.4922	-2.9548	0.4873	-0.7196	-0.7741		1111.5	-0.02955	0.03224	-0.00386	0.02231	-0.11587	0.05405	0.00246	0.01202	0.01958												1111.5	-0.0505344	0.0543997	-0.0174613	0.0217713	-0.109881	0.0665922	-0.00151919	0.0214413	0.0151274
1113.6	-0.9278	-0.5448	-8.9214	-7.4136	1.4835	-2.9292	0.4686	-0.7298	-0.7741		1113.6	-0.03596	-0.02857	-0.00353	-1.3701e-06	-0.12474	0.07875	-0.01621	0.00185	0.01953												1113.6	-0.0569444	-0.00641032	-0.0171313	-0.000540093	-0.118751	0.0912922	-0.0201892	0.0112713	0.0150774
1115.7	-0.9607	-0.5052	-8.9139	-7.4182	1.4996	-2.9317	0.5009	-0.7604	-0.7852		1115.7	-0.06898	0.00963	0.00429	-0.00482	-0.10881	0.07535	0.01613	-0.02871	0.00838												1115.7	-0.0899644	0.0317897	-0.00931129	-0.00535872	-0.102821	0.0878922	0.0121508	-0.0192887	0.00392738
1117.8	-0.9056	-0.4795	-8.9227	-7.4078	1.4724	-2.8988	0.496	-0.7591	-0.7926		1117.8	-0.014	0.03392	-0.00418	0.00537	-0.13619	0.10735	0.01126	-0.02738	0.000924023												1117.8	-0.0349844	0.0560797	-0.0177813	0.00483128	-0.130201	0.119892	0.00728081	-0.0179587	-0.0035286
1119.9	-0.8389	-0.4894	-8.929	-7.445	1.4761	-2.917	0.4947	-0.7617	-0.7913		1119.9	0.05259	0.02261	-0.01015	-0.03204	-0.13266	0.08826	0.00999	-0.02994	0.00217												1119.9	0.0316056	0.0447697	-0.0237513	-0.0325787	-0.126671	0.100802	0.00601081	-0.0205187	-0.00228262
1122	-0.77	-0.4933	-8.9705	-7.4217	1.507	-2.9402	0.4984	-0.7298	-0.7778		1122	0.12137	0.01731	-0.05133	-0.00896	-0.10193	0.06416	0.01373	0.00199	0.01562												1122	0.100386	0.0394697	-0.0649313	-0.00949872	-0.0959411	0.0767022	0.00975081	0.0114113	0.0111674
1124.1	-0.7181	-0.5092	-8.9265	-7.4043	1.5379	-2.9122	0.4798	-0.7209	-0.8012		1124.1	0.17316	0	-0.007	0.00823	-0.0712	0.09126	-0.00484	0.01092	-0.00783												1124.1	0.152176	0.0221597	-0.0206013	0.00769128	-0.0652111	0.103802	-0.00881919	0.0203413	-0.0122826
1126.2	-0.7192	-0.4854	-8.929	-7.3892	1.4922	-2.911	0.5084	-0.7566	-0.7827		1126.2	0.17194	0.02303	-0.00917	0.02312	-0.11707	0.09156	0.0238	-0.02474	0.01061												1126.2	0.150956	0.0451897	-0.0227713	0.0225813	-0.111081	0.104102	0.0198208	-0.0153187	0.00615738
1128.3	-0.7372	-0.4973	-8.924	-7.3833	1.4626	-2.8988	0.5146	-0.7298	-0.7778		1128.3	0.15383	0.01035	-0.00385	0.0288	-0.14684	0.10286	0.03003	0.00209	0.01546												1128.3	0.132846	0.0325097	-0.0174513	0.0282613	-0.140851	0.115402	0.0260508	0.0115113	0.0110074
1130.4	-0.7139	-0.4874	-8.9592	-7.402	1.5119	-2.9317	0.5121	-0.726	-0.779		1130.4	0.17701	0.01948	-0.03872	0.00989	-0.09771	0.06906	0.02756	0.00592	0.01421												1130.4	0.156026	0.0416397	-0.0523213	0.00935128	-0.0917211	0.0816022	0.0235808	0.0153413	0.00975738
1132.5	-0.7065	-0.4418	-8.9516	-7.395	1.5095	-2.9231	0.496	-0.7056	-0.7962		1132.5	0.18429	0.0643	-0.03079	0.01668	-0.10029	0.07676	0.0115	0.02636	-0.00304												1132.5	0.163306	0.0864597	-0.0443913	0.0161413	-0.0943011	0.0893022	0.00752081	0.0357813	-0.00749262
1134.6	-0.7541	-0.4557	-8.9416	-7.4008	1.4984	-2.8914	0.527	-0.7349	-0.7655		1134.6	0.13658	0.04963	-0.02047	0.01066	-0.11156	0.10756	0.04253	-0.00291	0.0276												1134.6	0.115596	0.0717897	-0.0340713	0.0101213	-0.105571	0.120102	0.0385508	0.00651133	0.0231474
1136.7	-0.7923	-0.4596	-8.9692	-7.3845	1.465	-2.9146	0.5009	-0.74	-0.7803		1136.7	0.09826	0.04496	-0.04774	0.02675	-0.14513	0.08346	0.01646	-0.00797	0.01275												1136.7	0.0772756	0.0671197	-0.0613413	0.0262113	-0.139141	0.0960022	0.0124808	0.00145133	0.00829738
1138.8	-0.8346	-0.4795	-8.9554	-7.3624	1.491	-2.911	0.4935	-0.7553	-0.768		1138.8	0.05585	0.02428	-0.03361	0.04863	-0.1193	0.08617	0.0091	-0.02324	0.025												1138.8	0.0348656	0.0464397	-0.0472113	0.0480913	-0.113311	0.0987122	0.00512081	-0.0138187	0.0205474
1140.9	-0.8791	-0.4676	-8.9378	-7.3985	1.4934	-2.9439	0.496	-0.7515	-0.8061		1140.9	0.01123	0.03541	-0.01569	0.01232	-0.11707	0.05237	0.01163	-0.01941	-0.01315												1140.9	-0.00975444	0.0575697	-0.0292913	0.0117813	-0.111081	0.0649122	0.00765081	-0.00998867	-0.0176026
1143	-0.9141	-0.4933	-8.9416	-7.4124	1.5119	-2.9573	0.4935	-0.7273	-0.7717		1143	-0.02388	0.00894	-0.01916	-0.00179	-0.09874	0.03807	0.00916	0.00483	0.02119												1143	-0.0448644	0.0310997	-0.0327613	-0.00232872	-0.0927511	0.0506122	0.00518081	0.0142513	0.0167374
1145.1	-0.9999	-0.5211	-8.9655	-7.3961	1.5255	-2.9195	0.4823	-0.7196	-0.7729		1145.1	-0.1098	-0.01964	-0.04273	0.01429	-0.08532	0.07497	-0.002	0.01256	0.01994												1145.1	-0.130784	0.00251968	-0.0563313	0.0137513	-0.0793311	0.0875122	-0.00597919	0.0219813	0.0154874
1147.2	-0.9829	-0.4478	-8.9592	-7.3799	1.4823	-2.9292	0.5084	-0.7107	-0.795		1147.2	-0.09292	0.05289	-0.03611	0.03028	-0.12869	0.06437	0.02413	0.02149	-0.00221												1147.2	-0.113904	0.0750497	-0.0497113	0.0297413	-0.122701	0.0769122	0.0201508	0.0309113	-0.00666262
1149.3	-0.913	-0.4616	-8.9806	-7.3996	1.4724	-2.9195	0.4935	-0.7069	-0.8036		1149.3	-0.02313	0.03831	-0.05718	0.01037	-0.13876	0.07317	0.00927	0.02533	-0.01087												1149.3	-0.0441144	0.0604697	-0.0707813	0.00983128	-0.132771	0.0857122	0.00529081	0.0347513	-0.0153226
1151.4	-0.7976	-0.4973	-8.9755	-7.4031	1.4823	-2.9146	0.5059	-0.6878	-0.7754		1151.4	0.09215	0.00184	-0.05175	0.00665	-0.12903	0.07717	0.0217	0.04446	0.01728												1151.4	0.0711656	0.0239997	-0.0653513	0.00611128	-0.123041	0.0897122	0.0177208	0.0538813	0.0128274
1153.5	-0.6874	-0.5131	-8.9504	-7.3915	1.5021	-2.939	0.5208	-0.7285	-0.7766		1153.5	0.20224	-0.01473	-0.02633	0.01804	-0.1094	0.05187	0.03663	0.00379	0.01603												1153.5	0.181256	0.00742968	-0.0399313	0.0175013	-0.103411	0.0644122	0.0326508	0.0132113	0.0115774
1155.6	-0.698	-0.531	-8.9806	-7.3996	1.5156	-2.9378	0.4835	-0.7324	-0.7827		1155.6	0.19152	-0.03341	-0.0562	0.00973	-0.09607	0.05217	-0.000633552	-7.18431e-05	0.00988												1155.6	0.170536	-0.0112503	-0.0698013	0.00919128	-0.0900811	0.0647122	-0.00461274	0.00934949	0.00542738
1157.7	-0.6789	-0.4676	-8.9491	-7.395	1.4613	-2.9292	0.5059	-0.7629	-0.7852		1157.7	0.21051	0.02922	-0.02437	0.01411	-0.15054	0.05987	0.0218	-0.03054	0.00732												1157.7	0.189526	0.0513797	-0.0379713	0.0135713	-0.144551	0.0724122	0.0178208	-0.0211187	0.00286738
1159.8	-0.6959	-0.5092	-8.9315	-7.395	1.4576	-2.9122	0.4997	-0.7604	-0.768		1159.8	0.19339	-0.01316	-0.00645	0.0139	-0.15442	0.07598	0.01563	-0.028	0.02447												1159.8	0.172406	0.00899968	-0.0200513	0.0133613	-0.148431	0.0885222	0.0116508	-0.0185787	0.0200174
1161.9	-0.7383	-0.5211	-8.9541	-7.3833	1.5082	-2.928	0.5047	-0.6967	-0.7815		1161.9	0.15087	-0.02583	-0.02872	0.02538	-0.10399	0.05928	0.02067	0.03573	0.01092												1161.9	0.129886	-0.00367032	-0.0423213	0.0248413	-0.0980011	0.0718222	0.0166908	0.0451513	0.00646738
1164	-0.7965	-0.4933	-8.9567	-7.3717	1.4848	-2.9231	0.486	-0.7209	-0.8098		1164	0.09256	0.0012	-0.03099	0.03677	-0.12756	0.06328	0.002	0.01156	-0.01743												1164	0.0715756	0.0233597	-0.0445913	0.0362313	-0.121571	0.0758222	-0.00197919	0.0209813	-0.0218826
1166.1	-0.8431	-0.4478	-8.9064	-7.381	1.4478	-2.9073	0.4897	-0.7642	-0.8135		1166.1	0.04584	0.04592	0.01963	0.02726	-0.16473	0.07818	0.00573	-0.0317	-0.02119												1166.1	0.0248556	0.0680797	0.00602871	0.0267213	-0.158741	0.0907222	0.00175081	-0.0222787	-0.0256426
1168.2	-0.8961	-0.418	-8.9265	-7.3601	1.4675	-2.8939	0.5246	-0.7604	-0.7729		1168.2	-0.00727	0.07495	-0.000138889	0.04794	-0.1452	0.09068	0.04067	-0.02787	0.01936												1168.2	-0.0282544	0.0971097	-0.0137402	0.0474013	-0.139211	0.103222	0.0366908	-0.0184487	0.0149074
1170.3	-0.8802	-0.4398	-8.9365	-7.3892	1.5033	-2.9097	0.481	-0.7005	-0.7926		1170.3	0.00851	0.05238	-0.00981	0.01863	-0.10957	0.07398	-0.0029	0.03206	-0.000391096												1170.3	-0.0124744	0.0745397	-0.0234113	0.0180913	-0.103581	0.0865222	-0.00687919	0.0414813	-0.00484372
1172.4	-0.8717	-0.4715	-8.9453	-7.3764	1.5095	-2.9244	0.4823	-0.7145	-0.7631		1172.4	0.0169	0.0199	-0.01829	0.03122	-0.10354	0.05838	-0.00156	0.0181	0.02906												1172.4	-0.00408444	0.0420597	-0.0318913	0.0306813	-0.0975511	0.0709222	-0.00553919	0.0275213	0.0246074
1174.5	-0.9162	-0.4676	-8.9202	-7.4124	1.5193	-2.9402	0.4587	-0.7425	-0.7766		1174.5	-0.02772	0.02303	0.00714	-0.005	-0.09392	0.04168	-0.02513	-0.00987	0.0155												1174.5	-0.0487044	0.0451897	-0.00646129	-0.00553872	-0.0879311	0.0542222	-0.0291092	-0.000448666	0.0110474
1176.6	-0.9797	-0.422	-8.934	-7.3706	1.5058	-2.9244	0.4748	-0.7718	-0.7569		1176.6	-0.09134	0.06785	-0.00633	0.03659	-0.10759	0.05658	-0.009	-0.03914	0.03515												1176.6	-0.112324	0.0900097	-0.0199313	0.0360513	-0.101601	0.0691222	-0.0129792	-0.0297187	0.0306974
1178.7	-0.9787	-0.4537	-8.9365	-7.3985	1.4971	-2.8878	0.5159	-0.7527	-0.7385		1178.7	-0.09045	0.03538	-0.00851	0.00848	-0.11646	0.09229	0.03214	-0.02	0.0535												1178.7	-0.111434	0.0575397	-0.0221113	0.00794128	-0.110471	0.104832	0.0281608	-0.0105787	0.0490474
1180.8	-0.9204	-0.5052	-8.9567	-7.3857	1.523	-2.939	0.5072	-0.7209	-0.7618		1180.8	-0.03227	-0.01689	-0.02838	0.02106	-0.09073	0.04019	0.02347	0.01183	0.03015												1180.8	-0.0532544	0.00526968	-0.0419813	0.0205213	-0.0847411	0.0527322	0.0194908	0.0212513	0.0256974
1182.9	-0.8484	-0.4973	-8.924	-7.3729	1.5514	-2.917	0.4922	-0.6992	-0.7741		1182.9	0.03962	-0.00977	0.00465	0.03365	-0.0625	0.06129	0.0085	0.03357	0.01779												1182.9	0.0186356	0.0123897	-0.00895129	0.0331113	-0.0565111	0.0738322	0.00452081	0.0429913	0.0133374
1185	-0.7933	-0.5072	-8.9252	-7.3473	1.5021	-2.8914	0.4935	-0.7324	-0.8012		1185	0.0946	-0.02044	0.00378	0.05903	-0.11197	0.08599	0.00984	0.000399512	-0.00936												1185	0.0736156	0.00171968	-0.00982129	0.0584913	-0.105981	0.0985322	0.00586081	0.00982085	-0.0138126
1187.1	-0.7128	-0.4319	-8.9353	-7.3845	1.5119	-2.9012	0.5171	-0.7298	-0.7889		1187.1	0.17499	0.05408	-0.006	0.02162	-0.10235	0.07529	0.03347	0.00303	0.00289												1187.1	0.154006	0.0762397	-0.0196013	0.0210813	-0.0963611	0.0878322	0.0294908	0.0124513	-0.00156262
1189.2	-0.6599	-0.4715	-8.9629	-7.4066	1.4712	-2.8988	0.5196	-0.7413	-0.7987		1189.2	0.22777	0.01371	-0.03327	-0.000692953	-0.14322	0.07679	0.036	-0.00843	-0.00696												1189.2	0.206786	0.0358697	-0.0468713	-0.00123168	-0.137231	0.0893322	0.0320208	0.000991334	-0.0114126
1191.3	-0.6302	-0.4953	-8.9479	-7.4054	1.4687	-2.9231	0.4873	-0.7234	-0.7741		1191.3	0.25735	-0.01086	-0.01794	0.000293392	-0.14589	0.05159	0.00374	0.0095	0.01758												1191.3	0.236366	0.0112997	-0.0315413	-0.000245331	-0.139901	0.0641322	-0.000239185	0.0189213	0.0131274
1193.4	-0.7044	-0.5508	-8.973	-7.3822	1.5033	-2.9402	0.4922	-0.6929	-0.7803		1193.4	0.18304	-0.06714	-0.04272	0.02328	-0.11146	0.03359	0.00867	0.04003	0.01133												1193.4	0.162056	-0.0449803	-0.0563213	0.0227413	-0.105471	0.0461322	0.00469081	0.0494513	0.00687738
1195.5	-0.8315	-0.5587	-8.9453	-7.3857	1.5366	-2.8841	0.4748	-0.7718	-0.7901		1195.5	0.05582	-0.07581	-0.01469	0.01957	-0.07833	0.08879	-0.00869	-0.03883	0.00148												1195.5	0.0348356	-0.0536503	-0.0282913	0.0190313	-0.0723411	0.101332	-0.0126692	-0.0294087	-0.00297262
1197.6	-0.9173	-0.4874	-8.9441	-7.3729	1.486	-2.8793	0.5196	-0.7527	-0.7631		1197.6	-0.03009	-0.00528	-0.01316	0.03215	-0.1291	0.0927	0.03614	-0.0197	0.02843												1197.6	-0.0510744	0.0168797	-0.0267613	0.0316113	-0.123111	0.105242	0.0321608	-0.0102787	0.0239774
1199.7	-0.9734	-0.529	-8.9353	-7.3915	1.4984	-2.9146	0.5308	-0.7464	-0.7704		1199.7	-0.08631	-0.04766	-0.00404	0.01334	-0.11687	0.0565	0.04737	-0.01336	0.02107												1199.7	-0.107294	-0.0255003	-0.0176413	0.0128013	-0.110881	0.0690422	0.0433908	-0.00393867	0.0166174
1201.8	-0.9501	-0.5508	-8.9214	-7.3985	1.4761	-2.9231	0.5096	-0.712	-0.768		1201.8	-0.06313	-0.07023	0.01019	0.00613	-0.13935	0.0471	0.02621	0.02107	0.02342												1201.8	-0.0841144	-0.0480703	-0.00341129	0.00559128	-0.133361	0.0596422	0.0222308	0.0304913	0.0189674
1203.9	-0.9151	-0.5191	-8.9315	-7.4113	1.5267	-2.9353	0.4873	-0.7031	-0.7975		1203.9	-0.02824	-0.03931	0.000416143	-0.00689	-0.08892	0.034	0.00394	0.03	-0.00613												1203.9	-0.0492244	-0.0171503	-0.0131851	-0.00742872	-0.0829311	0.0465422	-3.91853e-05	0.0394213	-0.0105826
1206	-0.8505	-0.4894	-8.9227	-7.3624	1.4947	-2.8939	0.5047	-0.7425	-0.7582		1206	0.03624	-0.01038	0.00954	0.0418	-0.12109	0.0745	0.02137	-0.00936	0.03311												1206	0.0152556	0.0117797	-0.00406129	0.0412613	-0.115101	0.0870422	0.0173908	6.13336e-05	0.0286574
1208.1	-0.7859	-0.4557	-8.9655	-7.3822	1.4885	-2.889	0.4686	-0.7502	-0.7004		1208.1	0.10073	0.02255	-0.03293	0.02178	-0.12746	0.0785	-0.01469	-0.01703	0.09086												1208.1	0.0797456	0.0447097	-0.0465313	0.0212413	-0.121471	0.0910422	-0.0186692	-0.00760867	0.0864074
1210.2	-0.7594	-0.5389	-8.9453	-7.4194	1.4996	-2.911	0.4674	-0.7489	-0.7483		1210.2	0.12711	-0.06143	-0.0124	-0.01563	-0.11653	0.0556	-0.01586	-0.0157	0.04291												1210.2	0.106126	-0.0392703	-0.0260013	-0.0161687	-0.110541	0.0681422	-0.0198392	-0.00627867	0.0384574
1212.3	-0.7192	-0.5369	-8.9692	-7.3985	1.528	-2.939	0.4624	-0.7336	-0.7618		1212.3	0.1672	-0.0602	-0.03598	0.00506	-0.0883	0.0267	-0.02083	-0.000362802	0.02936												1212.3	0.146216	-0.0380403	-0.0495813	0.00452128	-0.0823111	0.0392422	-0.0248092	0.00905853	0.0249074
1214.4	-0.7605	-0.5409	-8.9516	-7.3799	1.5255	-2.9426	0.4935	-0.7362	-0.7668		1214.4	0.12578	-0.06498	-0.01805	0.02344	-0.09098	0.0222	0.01031	-0.00293	0.0243												1214.4	0.104796	-0.0428203	-0.0316513	0.0229013	-0.0849911	0.0347422	0.00633081	0.00649133	0.0198474
1216.5	-0.7986	-0.4755	-8.9629	-7.3764	1.4885	-2.9134	0.4922	-0.7311	-0.779		1216.5	0.08756	-0.000349602	-0.02902	0.02673	-0.12815	0.05051	0.00904	0.0022	0.01205												1216.5	0.0665756	0.0218101	-0.0426213	0.0261913	-0.122161	0.0630522	0.00506081	0.0116213	0.00759738
1218.6	-0.8039	-0.4577	-8.9428	-7.402	1.4811	-2.911	0.5084	-0.7578	-0.7582		1218.6	0.08215	0.01668	-0.0086	0.000915875	-0.13572	0.05201	0.02528	-0.02446	0.0328												1218.6	0.0611656	0.0388397	-0.0222013	0.000377152	-0.129731	0.0645522	0.0213008	-0.0150387	0.0283474
1220.7	-0.7552	-0.4438	-8.9592	-7.4066	1.5416	-2.917	0.4699	-0.7005	-0.7815		1220.7	0.13073	0.0298	-0.02467	-0.0039	-0.07539	0.04511	-0.01319	0.03287	0.00945												1220.7	0.109746	0.0519597	-0.0382713	-0.00443872	-0.0694011	0.0576522	-0.0171692	0.0422913	0.00499738
1222.8	-0.7351	-0.5151	-8.9466	-7.4113	1.5724	-2.917	0.4549	-0.7107	-0.7741		1222.8	0.15072	-0.04227	-0.01174	-0.00881	-0.04476	0.04421	-0.02816	0.02271	0.01679												1222.8	0.129736	-0.0201103	-0.0253413	-0.00934872	-0.0387711	0.0567522	-0.0321392	0.0321313	0.0123374
1224.9	-0.7668	-0.5012	-8.929	-7.3915	1.5885	-2.8866	0.4798	-0.7438	-0.7938		1224.9	0.1189	-0.02915	0.00618	0.01077	-0.02883	0.07371	-0.00322	-0.01036	-0.00296												1224.9	0.0979156	-0.00699032	-0.00742129	0.0102313	-0.0228411	0.0862522	-0.00719919	-0.000938666	-0.00741262
1227	-0.8961	-0.4933	-8.9353	-7.4159	1.5391	-2.8939	0.4897	-0.7706	-0.7618		1227	-0.01051	-0.02202	0.000210576	-0.01384	-0.0784	0.06551	0.00671	-0.03713	0.02899												1227	-0.0314944	0.000139679	-0.0133907	-0.0143787	-0.0724111	0.0780522	0.00273081	-0.0277087	0.0245374
1229.1	-0.9533	-0.426	-8.9516	-7.4066	1.5243	-2.928	0.4997	-0.7005	-0.7594		1229.1	-0.06783	0.04451	-0.01576	-0.00475	-0.09338	0.03051	0.01674	0.03301	0.03134												1229.1	-0.0888144	0.0666697	-0.0293613	-0.00528872	-0.0873911	0.0430522	0.0127608	0.0424313	0.0268874
1231.2	-0.9999	-0.4894	-8.9818	-7.3892	1.5527	-2.9548	0.496	-0.7005	-0.7876		1231.2	-0.11455	-0.01967	-0.04564	0.01243	-0.06515	0.00281	0.01308	0.03304	0.00308												1231.2	-0.135534	0.00248968	-0.0592413	0.0118913	-0.0591611	0.0153522	0.00910081	0.0424613	-0.00137262
1233.3	-1.0158	-0.5409	-8.9416	-7.4217	1.549	-2.911	0.4438	-0.7018	-0.7975		1233.3	-0.13056	-0.07194	-0.00511	-0.02028	-0.06902	0.04571	-0.03909	0.03177	-0.00687												1233.3	-0.151544	-0.0497803	-0.0187113	-0.0208187	-0.0630311	0.0582522	-0.0430692	0.0411913	-0.0113226
1235.4	-1.0126	-0.5012	-8.929	-7.3996	1.581	-2.8951	0.4674	-0.7553	-0.8196		1235.4	-0.12748	-0.03301	0.00782	0.00161	-0.03719	0.06072	-0.01546	-0.02169	-0.02902												1235.4	-0.148464	-0.0108503	-0.00578129	0.00107128	-0.0312011	0.0732622	-0.0194392	-0.0122687	-0.0334726
1237.5	-0.9617	-0.4458	-8.924	-7.4101	1.5428	-2.8914	0.5096	-0.7527	-0.8208		1237.5	-0.07669	0.02161	0.01314	-0.00911	-0.07556	0.06352	0.02678	-0.01906	-0.03027												1237.5	-0.0976744	0.0437697	-0.00046129	-0.00964872	-0.0695711	0.0760622	0.0228008	-0.00963867	-0.0347226
1239.6	-0.8611	-0.4775	-8.9051	-7.3985	1.5255	-2.8988	0.4748	-0.7273	-0.8085		1239.6	0.02379	-0.01086	0.03237	0.00228	-0.09303	0.05522	-0.00799	0.00637	-0.01803												1239.6	0.00280556	0.0112997	0.0187687	0.00174128	-0.0870411	0.0677622	-0.0119692	0.0157913	-0.0224826
1241.7	-0.7541	-0.5112	-8.9189	-7.4206	1.523	-2.9	0.4699	-0.7107	-0.8233		1241.7	0.13068	-0.04534	0.0189	-0.02003	-0.0957	0.05312	-0.01285	0.02301	-0.03288												1241.7	0.109696	-0.0231803	0.00529871	-0.0205687	-0.0897111	0.0656622	-0.0168292	0.0324313	-0.0373326
1243.8	-0.6821	-0.5012	-8.9139	-7.4089	1.5675	-2.878	0.4786	-0.7158	-0.8061		1243.8	0.20256	-0.03611	0.02422	-0.00855	-0.05138	0.07422	-0.00412	0.01794	-0.01573												1243.8	0.181576	-0.0139503	0.0106187	-0.00908872	-0.0453911	0.0867622	-0.00809919	0.0273613	-0.0201826
1245.9	-0.7065	-0.4834	-8.9152	-7.4159	1.5403	-2.8683	0.4873	-0.7425	-0.8221		1245.9	0.17804	-0.01908	0.02325	-0.01576	-0.07875	0.08302	0.00461	-0.00872	-0.03178												1245.9	0.157056	0.00307968	0.00964871	-0.0162987	-0.0727611	0.0955622	0.000630815	0.000701334	-0.0362326
1248	-0.7626	-0.4695	-8.9328	-7.4124	1.4897	-2.9024	0.481	-0.7629	-0.7913		1248	0.12183	-0.00596	0.00598	-0.01248	-0.12952	0.04802	-0.00165	-0.02909	-0.00104												1248	0.100846	0.0161997	-0.00762129	-0.0130187	-0.123531	0.0605622	-0.00562919	-0.0196687	-0.00549262
1250.1	-0.806	-0.5072	-8.9177	-7.4252	1.5107	-2.9341	0.481	-0.7451	-0.7926		1250.1	0.07831	-0.04443	0.02141	-0.02549	-0.10869	0.01542	-0.00162	-0.01126	-0.00239												1250.1	0.0573256	-0.0222703	0.00780871	-0.0260287	-0.102701	0.0279622	-0.00559919	-0.00183867	-0.00684262
1252.2	-0.8421	-0.5369	-8.9441	-7.4543	1.5465	-2.917	0.4599	-0.7744	-0.8098		1252.2	0.0421	-0.07491	-0.00467	-0.0548	-0.07306	0.03162	-0.02269	-0.04052	-0.01964												1252.2	0.0211156	-0.0527503	-0.0182713	-0.0553387	-0.0670711	0.0441622	-0.0266692	-0.0310987	-0.0240926
1254.3	-0.8897	-0.4795	-8.9277	-7.4206	1.5341	-2.9134	0.4686	-0.7909	-0.8257		1254.3	-0.00562	-0.01828	0.01206	-0.02132	-0.08563	0.03433	-0.01395	-0.05699	-0.0356												1254.3	-0.0266044	0.00387968	-0.00154129	-0.0218587	-0.0796411	0.0468722	-0.0179292	-0.0475687	-0.0400526
1256.4	-0.9501	-0.5072	-8.939	-7.402	1.5675	-2.8829	0.4612	-0.8164	-0.8024		1256.4	-0.06613	-0.04675	0.00109	-0.00293	-0.05241	0.06393	-0.02132	-0.08246	-0.01235												1256.4	-0.0871144	-0.0245903	-0.0125113	-0.00346872	-0.0464211	0.0764722	-0.0252992	-0.0730387	-0.0168026
1258.5	-0.9639	-0.5012	-8.929	-7.3996	1.5527	-2.9036	0.4922	-0.8088	-0.7704		1258.5	-0.08005	-0.04153	0.01141	-0.000743571	-0.06738	0.04233	0.00971	-0.07482	0.0196												1258.5	-0.101034	-0.0193703	-0.00219129	-0.00128229	-0.0613911	0.0548722	0.00573081	-0.0653987	0.0151474
1260.6	-0.9331	-0.5131	-8.939	-7.3973	1.5588	-2.9012	0.4649	-0.7413	-0.7594		1260.6	-0.04937	-0.0542	0.00174	0.00134	-0.06145	0.04383	-0.01755	-0.00729	0.03055												1260.6	-0.0703544	-0.0320403	-0.0118613	0.000801277	-0.0554611	0.0563722	-0.0215292	0.00213133	0.0260974
1262.7	-0.8346	-0.4953	-8.9441	-7.4031	1.5786	-2.9049	0.4549	-0.7056	-0.7926		1262.7	0.04902	-0.03717	-0.00303	-0.00467	-0.04182	0.03923	-0.02752	0.02845	-0.00271												1262.7	0.0280356	-0.0150103	-0.0166313	-0.00520872	-0.0358311	0.0517722	-0.0314992	0.0378713	-0.00716262
1264.8	-0.8219	-0.5131	-8.9139	-7.4089	1.5872	-2.9414	0.4711	-0.7413	-0.7704		1264.8	0.0616	-0.05575	0.02749	-0.01068	-0.03339	0.00183	-0.01128	-0.00722	0.01944												1264.8	0.0406156	-0.0335903	0.0138887	-0.0112187	-0.0274011	0.0143722	-0.0152592	0.00220133	0.0149874
1266.9	-0.8442	-0.4775	-8.934	-7.3868	1.5773	-2.928	0.4674	-0.7999	-0.7987		1266.9	0.03919	-0.02092	0.00772	0.0112	-0.04346	0.01433	-0.01495	-0.06579	-0.00891												1266.9	0.0182056	0.00123968	-0.00588129	0.0106613	-0.0374711	0.0268722	-0.0189292	-0.0563687	-0.0133626
1269	-0.8315	-0.4913	-8.9466	-7.3764	1.5922	-2.9183	0.5109	-0.8126	-0.7889		1269	0.05177	-0.0355	-0.00455	0.02139	-0.02873	0.02313	0.02858	-0.07845	0.000836479												1269	0.0307856	-0.0133403	-0.0181513	0.0208513	-0.0227411	0.0356722	0.0246008	-0.0690287	-0.00361614
1271.1	-0.7944	-0.5508	-8.9265	-7.3973	1.5959	-2.9195	0.4823	-0.7578	-0.8061		1271.1	0.08876	-0.09577	0.01587	0.000274498	-0.02521	0.02103	1.67476e-05	-0.02362	-0.01642												1271.1	0.0677756	-0.0736103	0.00226871	-0.000264225	-0.0192211	0.0335722	-0.00396244	-0.0141987	-0.0208726
1273.2	-0.7139	-0.5468	-8.9441	-7.4008	1.5983	-2.9195	0.4512	-0.754	-0.8024		1273.2	0.16914	-0.09254	-0.0014	-0.00344	-0.02298	0.02014	-0.03105	-0.01979	-0.01277												1273.2	0.148156	-0.0703803	-0.0150013	-0.00397872	-0.0169911	0.0326822	-0.0350292	-0.0103687	-0.0172226
1275.3	-0.7213	-0.5607	-8.9202	-7.3938	1.6033	-2.889	0.4723	-0.7604	-0.7975		1275.3	0.16162	-0.10722	0.02283	0.00335	-0.01815	0.04974	-0.00992	-0.02615	-0.00792												1275.3	0.140636	-0.0850603	0.00922871	0.00281128	-0.0121611	0.0622822	-0.0138992	-0.0167287	-0.0123726
1277.4	-0.751	-0.4161	-8.9227	-7.3857	1.5527	-2.8939	0.5096	-0.7744	-0.8012		1277.4	0.13181	0.03661	0.02065	0.01123	-0.06892	0.04394	0.02742	-0.04012	-0.01167												1277.4	0.110826	0.0587697	0.00704871	0.0106913	-0.0629311	0.0564822	0.0234408	-0.0306987	-0.0161226
1279.5	-0.7679	-0.4497	-8.9378	-7.4113	1.5662	-2.9061	0.4736	-0.7591	-0.779		1279.5	0.11479	0.00223	0.00588	-0.01458	-0.05559	0.03084	-0.00855	-0.02479	0.01047												1279.5	0.0938056	0.0243897	-0.00772129	-0.0151187	-0.0496011	0.0433822	-0.0125292	-0.0153687	0.00601738
1281.6	-0.7711	-0.5112	-8.939	-7.4136	1.5823	-2.928	0.4587	-0.7183	-0.7987		1281.6	0.11148	-0.06004	0.00501	-0.01709	-0.03966	0.00804	-0.02342	0.01605	-0.00928												1281.6	0.0904956	-0.0378803	-0.00859129	-0.0176287	-0.0336711	0.0205822	-0.0273992	0.0254713	-0.0137326
1283.7	-0.805	-0.5072	-8.9051	-7.4054	1.5761	-2.9122	0.4748	-0.7324	-0.7852		1283.7	0.07746	-0.05681	0.03923	-0.00911	-0.04604	0.02294	-0.00728	0.00198	0.00417												1283.7	0.0564756	-0.0346503	0.0256287	-0.00964872	-0.0400511	0.0354822	-0.0112592	0.0114013	-0.00028262
1285.8	-0.8622	-0.5131	-8.9164	-7.3892	1.6057	-2.9049	0.4972	-0.7617	-0.7864		1285.8	0.02015	-0.06349	0.02826	0.00688	-0.01661	0.02934	0.01515	-0.02728	0.00292												1285.8	-0.000834442	-0.0413303	0.0146587	0.00634128	-0.0106211	0.0418822	0.0111708	-0.0178587	-0.00153262
1287.9	-0.8897	-0.4755	-8.9428	-7.3927	1.6144	-2.8744	0.4897	-0.7629	-0.7778		1287.9	-0.00747	-0.02666	0.00219	0.00317	-0.00808	0.05894	0.00769	-0.02845	0.01146												1287.9	-0.0284544	-0.00450032	-0.0114113	0.00263128	-0.00209109	0.0714822	0.00371081	-0.0190287	0.00700738
1290	-0.8378	-0.5409	-8.9504	-7.4078	1.6082	-2.8829	0.4798	-0.7617	-0.7999		1290	0.04431	-0.09283	-0.00509	-0.01215	-0.01445	0.04954	-0.00218	-0.02722	-0.01069												1290	0.0233256	-0.0706703	-0.0186913	-0.0126887	-0.00846109	0.0620822	-0.00615919	-0.0177987	-0.0151426
1292.1	-0.8209	-0.6063	-8.9328	-7.4054	1.607	-2.9049	0.4935	-0.7145	-0.8085		1292.1	0.0611	-0.15901	0.01284	-0.00996	-0.01582	0.02665	0.01155	0.02002	-0.01934												1292.1	0.0401156	-0.13685	-0.00076129	-0.0104987	-0.00983109	0.0391922	0.00757081	0.0294413	-0.0237926
1294.2	-0.8082	-0.5646	-8.939	-7.4252	1.6292	-2.889	0.4773	-0.7311	-0.8036		1294.2	0.07368	-0.11808	0.00697	-0.02998	0.00621	0.04165	-0.00461	0.00345	-0.01449												1294.2	0.0526956	-0.0959203	-0.00663129	-0.0305187	0.0121989	0.0541922	-0.00858919	0.0128713	-0.0189426
1296.3	-0.7954	-0.5646	-8.939	-7.4217	1.5996	-2.8659	0.5134	-0.7617	-0.7668		1296.3	0.08637	-0.11886	0.00729	-0.02669	-0.02356	0.06385	0.03152	-0.02712	0.02225												1296.3	0.0653856	-0.0967003	-0.00631129	-0.0272287	-0.0175711	0.0763922	0.0275408	-0.0176987	0.0177974
1298.4	-0.7827	-0.4775	-8.9705	-7.4136	1.5823	-2.9049	0.4873	-0.7362	-0.7655		1298.4	0.09895	-0.03253	-0.02388	-0.0188	-0.04104	0.02395	0.00545	-0.00158	0.0235												1298.4	0.0779656	-0.0103703	-0.0374813	-0.0193387	-0.0350511	0.0364922	0.00147081	0.00784133	0.0190474
1300.5	-0.7616	-0.5151	-8.968	-7.431	1.5897	-2.9268	0.4599	-0.712	-0.7754		1300.5	0.11994	-0.0709	-0.02105	-0.03642	-0.03381	0.00115	-0.02191	0.02265	0.01355												1300.5	0.0989556	-0.0487403	-0.0346513	-0.0369587	-0.0278211	0.0136922	-0.0258892	0.0320713	0.00909738
1302.6	-0.7266	-0.5092	-8.9504	-7.4101	1.6341	-2.917	0.4438	-0.7145	-0.7864		1302.6	0.15482	-0.06578	-0.00313	-0.01573	0.01042	0.01005	-0.03798	0.02018	0.00249												1302.6	0.133836	-0.0436203	-0.0167313	-0.0162687	0.0164089	0.0225922	-0.0419592	0.0296013	-0.00196262
1304.7	-0.7351	-0.5012	-8.9592	-7.4089	1.5934	-2.9085	0.4425	-0.7489	-0.7803		1304.7	0.1462	-0.05855	-0.0116	-0.01474	-0.03045	0.01765	-0.03924	-0.01418	0.00854												1304.7	0.125216	-0.0363903	-0.0252013	-0.0152787	-0.0244611	0.0301922	-0.0432192	-0.00475867	0.00408738
1306.8	-0.8103	-0.4775	-8.9567	-7.4113	1.6156	-2.8963	0.4736	-0.7948	-0.784		1306.8	0.07089	-0.03563	-0.00877	-0.01736	-0.00842	0.02895	-0.00811	-0.06005	0.00479												1306.8	0.0499056	-0.0134703	-0.0223713	-0.0178987	-0.00243109	0.0414922	-0.0120892	-0.0506287	0.00033738
1308.9	-0.8315	-0.5112	-8.9843	-7.4264	1.5613	-2.8756	0.4624	-0.8164	-0.7582		1308.9	0.04957	-0.0701	-0.03605	-0.03267	-0.06289	0.04875	-0.01928	-0.08161	0.03054												1308.9	0.0285856	-0.0479403	-0.0496513	-0.0332087	-0.0569011	0.0612922	-0.0232592	-0.0721887	0.0260874
1311	-0.8452	-0.4359	-8.9881	-7.4217	1.586	-2.9219	0.4636	-0.7362	-0.7778		1311	0.03576	0.00443	-0.03952	-0.02818	-0.03836	0.00156	-0.01804	-0.00138	0.01088												1311	0.0147756	0.0265897	-0.0531213	-0.0287187	-0.0323711	0.0141022	-0.0220192	0.00804133	0.00642738
1313.1	-0.9321	-0.4973	-8.9202	-7.4136	1.623	-2.8963	0.4624	-0.7285	-0.7975		1313.1	-0.05126	-0.05775	0.02871	-0.0203	-0.00154	0.02626	-0.01921	0.00635	-0.00887												1313.1	-0.0722444	-0.0355903	0.0151087	-0.0208387	0.00444891	0.0388022	-0.0231892	0.0157713	-0.0133226
1315.2	-0.9713	-0.4795	-8.9541	-7.3938	1.6094	-2.8927	0.4711	-0.7515	-0.7778		1315.2	-0.09057	-0.04072	-0.00487	-0.000712259	-0.01531	0.02896	-0.01048	-0.01661	0.01078												1315.2	-0.111554	-0.0185603	-0.0184713	-0.00125098	-0.00932109	0.0415022	-0.0144592	-0.00718867	0.00632738
1317.3	-0.9808	-0.4279	-8.9629	-7.3903	1.5823	-2.8829	0.4599	-0.7489	-0.7876		1317.3	-0.10019	0.01011	-0.01334	0.00257	-0.04258	0.03786	-0.02164	-0.01398	0.000926569												1317.3	-0.121174	0.0322697	-0.0269413	0.00203128	-0.0365911	0.0504022	-0.0256192	-0.00455867	-0.00352605
1319.4	-0.9639	-0.4814	-8.9516	-7.388	1.5885	-2.8866	0.4786	-0.7476	-0.7999		1319.4	-0.08341	-0.04417	-0.00171	0.00466	-0.03655	0.03326	-0.00291	-0.01265	-0.01143												1319.4	-0.104394	-0.0220103	-0.0153113	0.00412128	-0.0305611	0.0458022	-0.00688919	-0.00322867	-0.0158826
1321.5	-0.8696	-0.5389	-8.9592	-7.402	1.6465	-2.8829	0.4699	-0.7464	-0.8098		1321.5	0.01078	-0.10244	-0.00898	-0.00955	0.02128	0.03606	-0.01158	-0.01141	-0.02138												1321.5	-0.0102044	-0.0802803	-0.0225813	-0.0100887	0.0272689	0.0486022	-0.0155592	-0.00198867	-0.0258326
1323.6	-0.823	-0.4795	-8.9428	-7.395	1.6341	-2.8975	0.4786	-0.7298	-0.8135		1323.6	0.05726	-0.04382	0.00774	-0.00277	0.00871	0.02056	-0.00284	0.00522	-0.02513												1323.6	0.0362756	-0.0216603	-0.00586129	-0.00330872	0.0146989	0.0331022	-0.00681919	0.0146413	-0.0295826
1325.7	-0.7902	-0.4834	-8.9541	-7.3682	1.6477	-2.8573	0.4686	-0.7566	-0.8098		1325.7	0.08995	-0.04849	-0.00323	0.02382	0.02213	0.05986	-0.01281	-0.02154	-0.02148												1325.7	0.0689656	-0.0263303	-0.0168313	0.0232813	0.0281189	0.0724022	-0.0167892	-0.0121187	-0.0259326
1327.8	-0.7827	-0.4497	-8.9768	-7.3543	1.6181	-2.8659	0.5146	-0.7897	-0.7913		1327.8	0.09733	-0.01556	-0.0256	0.03751	-0.00764	0.05036	0.03323	-0.05461	-0.00304												1327.8	0.0763456	0.00659968	-0.0392013	0.0369713	-0.00165109	0.0629022	0.0292508	-0.0451887	-0.00749262
1329.9	-0.7711	-0.4695	-8.9705	-7.3624	1.6539	-2.8793	0.4997	-0.7757	-0.7926		1329.9	0.10882	-0.03614	-0.01898	0.02919	0.02799	0.03606	0.01836	-0.04058	-0.00439												1329.9	0.0878356	-0.0139803	-0.0325813	0.0286513	0.0339789	0.0486022	0.0143808	-0.0311587	-0.00884262
1332	-0.7488	-0.5052	-8.9743	-7.4101	1.6403	-2.878	0.5171	-0.7642	-0.8331		1332	0.131	-0.07261	-0.02245	-0.01872	0.01422	0.03647	0.03579	-0.02904	-0.04494												1332	0.110016	-0.0504503	-0.0360513	-0.0192587	0.0202089	0.0490122	0.0318108	-0.0196187	-0.0493926
1334.1	-0.7743	-0.5131	-8.9529	-7.3868	1.6477	-2.8793	0.5059	-0.7706	-0.8282		1334.1	0.10538	-0.08129	-0.000724327	0.00436	0.02145	0.03427	0.02463	-0.03541	-0.04009												1334.1	0.0843956	-0.0591303	-0.0143256	0.00382128	0.0274389	0.0468122	0.0206508	-0.0259887	-0.0445426
1336.2	-0.8166	-0.4022	-8.9554	-7.3775	1.644	-2.8659	0.5047	-0.8126	-0.8085		1336.2	0.06297	0.02884	-0.0029	0.01345	0.01758	0.04677	0.02346	-0.07738	-0.02045												1336.2	0.0419856	0.0509997	-0.0165013	0.0129113	0.0235689	0.0593122	0.0194808	-0.0679587	-0.0249026
1338.3	-0.8209	-0.42	-8.9353	-7.3868	1.5946	-2.8939	0.5134	-0.7858	-0.7815		1338.3	0.05855	0.01027	0.01753	0.00394	-0.03199	0.01787	0.03219	-0.05054	0.0065												1338.3	0.0375656	0.0324297	0.00392871	0.00340128	-0.0260011	0.0304122	0.0282108	-0.0411187	0.00204738
1340.4	-0.7891	-0.4953	-8.9743	-7.3961	1.5946	-2.9231	0.5022	-0.7171	-0.752		1340.4	0.09024	-0.06581	-0.02114	-0.00558	-0.03217	-0.01223	0.02103	0.01819	0.03595												1340.4	0.0692556	-0.0436503	-0.0347413	-0.00611872	-0.0261811	0.000312198	0.0170508	0.0276113	0.0314974
1342.5	-0.8166	-0.5528	-8.9504	-7.3729	1.6082	-2.8951	0.4748	-0.684	-0.8036		1342.5	0.06262	-0.12408	0.00308	0.01741	-0.01874	0.01487	-0.00634	0.05132	-0.0157												1342.5	0.0416356	-0.10192	-0.0105213	0.0168713	-0.0127511	0.0274122	-0.0103192	0.0607413	-0.0201526
1344.6	-0.8643	-0.4933	-8.9755	-7.3822	1.6193	-2.9012	0.5233	-0.7387	-0.8245		1344.6	0.01481	-0.06535	-0.02169	0.0079	-0.00781	0.00787	0.04219	-0.00334	-0.03666												1344.6	-0.00617444	-0.0431903	-0.0352913	0.00736128	-0.00182109	0.0204122	0.0382108	0.00608133	-0.0411126
1346.7	-0.913	-0.4577	-8.9541	-7.3531	1.6292	-2.8975	0.5171	-0.7476	-0.784		1346.7	-0.03401	-0.03053	3.62724e-05	0.03678	0.00192	0.01067	0.03603	-0.01221	0.00379												1346.7	-0.0549944	-0.00837032	-0.013565	0.0362413	0.00790891	0.0232122	0.0320508	-0.00278867	-0.00066262
1348.8	-0.9236	-0.5211	-8.9516	-7.3647	1.6033	-2.889	0.5059	-0.7375	-0.7631		1348.8	-0.04473	-0.0947	0.00286	0.02497	-0.02415	0.01827	0.02486	-0.00207	0.02464												1348.8	-0.0657144	-0.0725403	-0.0107413	0.0244313	-0.0181611	0.0308122	0.0208808	0.00735133	0.0201874
1350.9	-0.8601	-0.5112	-8.9831	-7.3752	1.6341	-2.8951	0.5034	-0.7362	-0.784		1350.9	0.01866	-0.08558	-0.02831	0.01426	0.00648	0.01128	0.0224	-0.0007407	0.00368												1350.9	-0.00232444	-0.0634203	-0.0419113	0.0137213	0.0124689	0.0238222	0.0184208	0.00868063	-0.00077262
1353	-0.8209	-0.4953	-8.9516	-7.3775	1.6144	-2.8951	0.481	-0.74	-0.8073		1353	0.05774	-0.07045	0.00352	0.01174	-0.0134	0.01038	2.87783e-05	-0.00451	-0.01967												1353	0.0367556	-0.0482903	-0.0100813	0.0112013	-0.00741109	0.0229222	-0.00395041	0.00491133	-0.0241226
1355.1	-0.7563	-0.4478	-8.9328	-7.3729	1.5996	-2.8646	0.4997	-0.7629	-0.8036		1355.1	0.12223	-0.02372	0.02264	0.01613	-0.02837	0.03998	0.01876	-0.02737	-0.01602												1355.1	0.101246	-0.00156032	0.00903871	0.0155913	-0.0223811	0.0525222	0.0147808	-0.0179487	-0.0204726
1357.2	-0.7255	-0.418	-8.934	-7.3496	1.5934	-2.878	0.5084	-0.7718	-0.7938		1357.2	0.15291	0.0053	0.02177	0.03921	-0.03474	0.02568	0.0275	-0.03624	-0.00627												1357.2	0.131926	0.0274597	0.00816871	0.0386713	-0.0287511	0.0382222	0.0235208	-0.0268187	-0.0107226
1359.3	-0.6916	-0.3744	-8.9529	-7.3973	1.6045	-2.8634	0.4786	-0.7566	-0.7901		1359.3	0.1867	0.04813	0.0032	-0.0087	-0.02381	0.03938	-0.00227	-0.02101	-0.00263												1359.3	0.165716	0.0702897	-0.0104013	-0.00923872	-0.0178211	0.0519222	-0.00624919	-0.0115887	-0.00708262
1361.4	-0.698	-0.4279	-8.968	-7.3671	1.6489	-2.889	0.4512	-0.7209	-0.7852		1361.4	0.18018	-0.00615	-0.01158	0.02129	0.02042	0.01288	-0.02964	0.01473	0.00222												1361.4	0.159196	0.0160097	-0.0251813	0.0207513	0.0264089	0.0254222	-0.0336192	0.0241513	-0.00223262
1363.5	-0.7308	-0.4656	-8.968	-7.3985	1.6563	-2.8975	0.491	-0.7133	-0.7803		1363.5	0.14726	-0.04462	-0.01125	-0.01033	0.02765	0.00348	0.0102	0.02236	0.00707												1363.5	0.126276	-0.0224603	-0.0248513	-0.0108687	0.0336389	0.0160222	0.00622081	0.0317813	0.00261738
1365.6	-0.8071	-0.4299	-8.9541	-7.381	1.6193	-2.9012	0.4736	-0.7489	-0.7754		1365.6	0.07085	-0.00969	0.00298	0.00696	-0.00952	-0.00112	-0.00717	-0.01321	0.01192												1365.6	0.0498656	0.0124697	-0.0106213	0.00642128	-0.00353109	0.0114222	-0.0111492	-0.00378867	0.00746738
1367.7	-0.8791	-0.3863	-8.9529	-7.3799	1.6057	-2.8963	0.5047	-0.7795	-0.7471		1367.7	-0.00127	0.03313	0.0045	0.00785	-0.0233	0.00288	0.02396	-0.04377	0.04016												1367.7	-0.0222544	0.0552897	-0.00910129	0.00731128	-0.0173111	0.0154222	0.0199808	-0.0343487	0.0357074
1369.8	-0.9321	-0.3863	-8.9315	-7.3589	1.6218	-2.8756	0.4935	-0.7515	-0.7778		1369.8	-0.05438	0.03236	0.02623	0.02863	-0.00737	0.02269	0.0128	-0.01574	0.00941												1369.8	-0.0753644	0.0545197	0.0126287	0.0280913	-0.00138109	0.0352322	0.00882081	-0.00631867	0.00495738
1371.9	-0.9321	-0.4438	-8.9328	-7.4008	1.6502	-2.8756	0.4661	-0.7145	-0.768		1371.9	-0.0545	-0.02591	0.02526	-0.01348	0.02086	0.02179	-0.01457	0.0213	0.01916												1371.9	-0.0754844	-0.00375032	0.0116587	-0.0140187	0.0268489	0.0343322	-0.0185492	0.0307213	0.0147074
1374	-0.8982	-0.4299	-8.9705	-7.3892	1.6489	-2.8927	0.4798	-0.7158	-0.7741		1374	-0.02071	-0.01279	-0.01212	-0.00209	0.01939	0.00379	-0.000834804	0.02003	0.01301												1374	-0.0416944	0.00936968	-0.0257213	-0.00262872	0.0253789	0.0163322	-0.00481399	0.0294513	0.00855738
1376.1	-0.8548	-0.3725	-8.9214	-7.4287	1.6267	-2.8793	0.486	-0.7629	-0.7987		1376.1	0.02257	0.04384	0.03731	-0.04181	-0.00298	0.01629	0.0054	-0.02704	-0.01165												1376.1	0.00158556	0.0659997	0.0237087	-0.0423487	0.00300891	0.0288322	0.00142081	-0.0176187	-0.0161026
1378.2	-0.8145	-0.3487	-8.968	-7.3927	1.6156	-2.8659	0.496	-0.7604	-0.7643		1378.2	0.06275	0.06686	-0.00896	-0.00602	-0.01425	0.02879	0.01543	-0.0245	0.0227												1378.2	0.0417656	0.0890197	-0.0225613	-0.00655872	-0.00826109	0.0413322	0.0114508	-0.0150787	0.0182474
1380.3	-0.7891	-0.3705	-8.9529	-7.395	1.6625	-2.8975	0.4935	-0.7502	-0.7827		1380.3	0.08804	0.04429	0.00646	-0.00854	0.03248	-0.00371	0.01297	-0.01427	0.00425												1380.3	0.0670556	0.0664497	-0.00714129	-0.00907872	0.0384689	0.0088322	0.00899081	-0.00484867	-0.00020262
1382.4	-0.7732	-0.3982	-8.9328	-7.3938	1.6761	-2.8866	0.5096	-0.7209	-0.7754		1382.4	0.10382	0.01582	0.02689	-0.00755	0.0459	0.00629	0.0291	0.01506	0.0115												1382.4	0.0828356	0.0379797	0.0132887	-0.00808872	0.0518889	0.0188322	0.0251208	0.0244813	0.00704738
1384.5	-0.7668	-0.4339	-8.9868	-7.3764	1.6625	-2.8975	0.486	-0.7158	-0.7618		1384.5	0.11011	-0.02066	-0.02678	0.00964	0.03213	-0.00551	0.00553	0.0202	0.02504												1384.5	0.0891256	0.00149968	-0.0403813	0.00910128	0.0381189	0.0070322	0.00155081	0.0296213	0.0205874
1386.6	-0.805	-0.3824	-8.9604	-7.3961	1.6378	-2.8902	0.4947	-0.7464	-0.7864		1386.6	0.07179	0.03007	-5.51621e-05	-0.01028	0.00726	0.000894512	0.01427	-0.01037	0.000390611												1386.6	0.0508056	0.0522297	-0.0136565	-0.0108187	0.0132489	0.0134367	0.0102908	-0.000948666	-0.00406201
1388.7	-0.8113	-0.3844	-8.9567	-7.395	1.623	-2.8756	0.486	-0.7438	-0.7864		1388.7	0.06538	0.02729	0.00397	-0.00939	-0.00771	0.0146	0.0056	-0.00773	0.000338006												1388.7	0.0443956	0.0494497	-0.00963129	-0.00992872	-0.00172109	0.0271422	0.00162081	0.00169133	-0.00411461
1390.8	-0.8304	-0.4022	-8.9956	-7.3996	1.6428	-2.8927	0.4897	-0.7502	-0.7852		1390.8	0.04616	0.00872	-0.0346	-0.0142	0.01192	-0.0034	0.00933	-0.0141	0.00149												1390.8	0.0251756	0.0308797	-0.0482013	-0.0147387	0.0179089	0.0091422	0.00535081	-0.00467867	-0.00296262
1392.9	-0.8526	-0.4339	-8.9642	-7.3985	1.66	-2.8878	0.4562	-0.6865	-0.7815		1392.9	0.02384	-0.02375	-0.00287	-0.01332	0.02895	0.000597805	-0.02413	0.04963	0.00513												1392.9	0.00285556	-0.00159032	-0.0164713	-0.0138587	0.0349389	0.01314	-0.0281092	0.0590513	0.00067738
1395	-0.9003	-0.4359	-8.9579	-7.3833	1.6576	-2.8878	0.5096	-0.7043	-0.7778		1395	-0.02397	-0.02653	0.00375	0.00167	0.02637	-0.000301098	0.0293	0.03187	0.00878												1395	-0.0449544	-0.00437032	-0.00985129	0.00113128	0.0323589	0.0122411	0.0253208	0.0412913	0.00432738
1397.1	-0.9353	-0.3606	-8.9453	-7.3961	1.6662	-2.8866	0.4674	-0.7362	-0.7999		1397.1	-0.05909	0.048	0.01668	-0.01134	0.0348	0	-0.01286	0	-0.01337												1397.1	-0.0800744	0.0701597	0.00307871	-0.0118787	0.0407889	0.0125422	-0.0168392	0.00942133	-0.0178226
[truncated: 17 more columns]

## Sheet: Fig7C CO2 timida
		Original data (P700 deltaI/I x10³)										After slope correction in Origin (baseline subtraction tool)												Zero levels												Zero levels set										Maximum at onset of light pulse
Time (ms)	Slug 1	Slug 2	Slug 3	Slug 4	Slug 5	Slug 6	Slug 7	Slug 8	Slug 9		Time (ms)	Slug 1	Slug 2	Slug 3	Slug 4	Slug 5	Slug 6	Slug 7	Slug 8	Slug 9		Slug 1	Slug 2	Slug 3	Slug 4	Slug 5	Slug 6	Slug 7	Slug 8	Slug 9		Time (ms)	Slug 1	Slug 2	Slug 3	Slug 4	Slug 5	Slug 6	Slug 7	Slug 8	Slug 9		Slug 1	Slug 2	Slug 3	Slug 4	Slug 5	Slug 6	Slug 7
-198.9	0.0671	-4.6822	-2.1215	-2.6333	12.0469	-3.2647	5.9053	5.1321	2.683		-198.9	-0.00199	0	0	-0.0037	0	-0.04724	-0.02345	0	0.01513		0.0112094	0.0131605	0.0182118	0.000820366	-0.00537094	0.000999174	0.00677478	0.0381282	-0.0066126		-198.9	-0.0131994	-0.0131605	-0.0182118	-0.00452037	0.00537094	-0.0482392	-0.0302248	-0.0381282	0.0217426		0.309495	0.256764	0.331834	0.217319	0.181086	0.188766	0.162233
-196.8	0.0643	-4.6822	-2.1173	-2.6452	12.0748	-3.1889	6.0161	5.1248	2.7255		-196.8	-0.00277	0.0025	0.00378	-0.01532	0.02875	0.0287	0.08724	-0.00921	0.05666												-196.8	-0.0139794	-0.0106605	-0.0144318	-0.0161404	0.0341209	0.0277008	0.0804652	-0.0473382	0.0632726
-194.7	0.0726	-4.7155	-2.13	-2.6226	12.0435	-3.1303	6.0193	5.1575	2.6856		-194.7	0.00756	-0.02831	-0.00935	0.00757	-0.00171	0.08745	0.09032	0.02159	0.01578												-194.7	-0.00364941	-0.0414705	-0.0275618	0.00674963	0.00366094	0.0864508	0.0835452	-0.0165382	0.0223926
-192.6	0.0794	-4.6222	-2.1399	-2.6203	12.1131	-3.1303	6.0258	5.1794	2.6625		-192.6	0.01638	0.06749	-0.01967	0.01016	0.06874	0.08759	0.09671	0.04158	-0.00829												-192.6	0.00517059	0.0543295	-0.0378818	0.00933963	0.0741109	0.0865908	0.0899352	0.00345179	-0.0016774
-190.5	0.0767	-4.5822	-2.1215	-2.6203	12.0435	-3.182	5.9607	5.1818	2.6779		-190.5	0.0157	0.10999	-0.00169	0.01044	-1.96562e-05	0.03604	0.0315	0.04207	0.00613												-190.5	0.00449059	0.0968295	-0.0199018	0.00961963	0.00535129	0.0350408	0.0247252	0.00394179	0.0127426
-188.4	0.0452	-4.6922	-2.1102	-2.6535	12.0574	-3.2268	5.9346	5.1636	2.6792		-188.4	-0.01377	0.00248	0.00918	-0.02247	0.01473	-0.00862	0.00528	0.02196	0.00645												-188.4	-0.0249794	-0.0106805	-0.00903177	-0.0232904	0.0201009	-0.00961917	-0.00149478	-0.0161682	0.0130626
-186.3	0.0602	-4.7655	-2.096	-2.6464	11.9738	-3.2302	5.9281	5.1284	2.629		-186.3	0.00325	-0.06832	0.02296	-0.01509	-0.06803	-0.01187	-0.00133	-0.01514	-0.04472												-186.3	-0.00795941	-0.0814805	0.00474823	-0.0159104	-0.0626591	-0.0128692	-0.00810478	-0.0532682	-0.0381074
-184.2	0.0438	-4.7688	-2.0492	-2.6179	11.9599	-3.2165	5.8271	5.2048	2.6406		-184.2	-0.01113	-0.06912	0.06934	0.0137	-0.08108	0.00197	-0.10245	0.05935	-0.0341												-184.2	-0.0223394	-0.0822805	0.0511282	0.0128796	-0.0757091	0.000970826	-0.109225	0.0212218	-0.0274874
-182.1	0.0561	-4.7355	-2.1258	-2.6405	12.0191	-3.2027	5.9151	5.2133	2.6354		-182.1	0.0032	-0.03333	-0.00769	-0.00861	-0.02104	0.01592	-0.01456	0.06594	-0.04028												-182.1	-0.00800941	-0.0464905	-0.0259018	-0.00943037	-0.0156691	0.0149208	-0.0213348	0.0278118	-0.0336674
-180	0.0698	-4.7755	-2.0861	-2.6405	12.0957	-3.2027	5.9509	5.1975	2.6432		-180	0.01892	-0.07083	0.03159	-0.00833	0.05641	0.01607	0.02112	0.04823	-0.03345												-180	0.00771059	-0.0839905	0.0133782	-0.00915037	0.0617809	0.0150708	0.0143452	0.0101018	-0.0268374
-177.9	0.0041	-4.7488	-2.0989	-2.6238	12.1027	-3.2682	5.9737	5.183	2.6419		-177.9	-0.04476	-0.04163	0.01837	0.00866	0.06425	-0.04929	0.04381	0.03183	-0.03573												-177.9	-0.0559694	-0.0547905	0.000158229	0.00783963	0.0696209	-0.0502892	0.0370352	-0.00629821	-0.0291174
-175.8	0.0726	-4.7621	-2.0818	-2.6238	12.0678	-3.375	5.8662	5.2145	2.6599		-175.8	0.02577	-0.05244	0.03504	0.00895	0.0302	-0.15594	-0.0638	0.06142	-0.0187												-175.8	0.0145606	-0.0656005	0.0168282	0.00812963	0.0355709	-0.156939	-0.0705748	0.0232918	-0.0120874
-173.7	0.0821	-4.6955	-2.1059	-2.5941	12.033	-3.282	5.8662	5.1963	2.6702		-173.7	0.03729	0.01666	0.01052	0.03893	-0.00376	-0.0628	-0.06392	0.04131	-0.00938												-173.7	0.0260806	0.00349949	-0.00769177	0.0381096	0.00161094	-0.0637992	-0.0706948	0.00318179	-0.0027674
-171.6	0.1013	-4.7055	-2.1003	-2.5906	12.0226	-3.2199	5.8141	5.2121	2.6663		-171.6	0.05851	0.00916	0.0157	0.04272	-0.01331	-0.000552469	-0.11613	0.05521	-0.01426												-171.6	0.0473006	-0.00400051	-0.00251177	0.0418996	-0.00793906	-0.00155164	-0.122905	0.0170818	-0.0076474
-169.5	0.0794	-4.7222	-2.0903	-2.625	12.0226	-3.213	5.9118	5.1878	2.6457		-169.5	0.03864	-0.00505	0.02527	0.0086	-0.01247	0.00649	-0.01855	0.029	-0.03583												-169.5	0.0274306	-0.0182105	0.00705823	0.00777963	-0.00709906	0.00549083	-0.0253248	-0.00912821	-0.0292174
-167.4	0.0958	-4.6722	-2.0705	-2.6226	12.0295	-3.244	5.9607	5.1903	2.6689		-167.4	0.05706	0.04745	0.04465	0.01129	-0.00472	-0.02436	0.03024	0.02959	-0.01361												-167.4	0.0458506	0.0342895	0.0264382	0.0104696	0.000650944	-0.0253592	0.0234652	-0.00853821	-0.0069974
-165.3	0.0794	-4.7755	-2.096	-2.6108	12.0365	-3.2199	5.9477	5.1878	2.6946		-165.3	0.04268	-0.05335	0.01873	0.02338	0.00312	-0.000116001	0.01712	0.02518	0.01111												-165.3	0.0314706	-0.0665105	0.000518229	0.0225596	0.00849094	-0.00111517	0.0103452	-0.0129482	0.0177226
-163.2	0.0493	-4.7022	-2.1102	-2.6131	11.9982	-3.182	5.9998	5.2133	2.6946		-163.2	0.01461	0.02244	0.0041	0.02136	-0.03433	0.03793	0.06911	0.04878	0.01014												-163.2	0.00340059	0.00927949	-0.0141118	0.0205396	-0.0289591	0.0369308	0.0623352	0.0106518	0.0167526
-161.1	0.0301	-4.7022	-2.0818	-2.6036	12.0435	-3.1889	5.9574	5.2509	2.6715		-161.1	-0.00257	0.02494	0.03208	0.03115	0.01181	0.03117	0.02659	0.08447	-0.01394												-161.1	-0.0137794	0.0117795	0.0138682	0.0303296	0.0171809	0.0301708	0.0198152	0.0463418	-0.0073274
-159	-0.0041	-4.7088	-2.0266	-2.6369	12.0121	-3.1889	5.9802	5.2303	2.6869		-159	-0.03475	0.02084	0.08686	-0.00186	-0.01874	0.03132	0.04928	0.06196	0.000485263												-159	-0.0459594	0.00767949	0.0686482	-0.00268037	-0.0133691	0.0303208	0.0425052	0.0238318	0.00709786
-156.9	0.0014	-4.7222	-2.0478	-2.6262	12.0086	-3.2027	5.8369	5.2436	2.7101		-156.9	-0.02722	0.00993	0.06523	0.00912	-0.0214	0.01767	-0.09413	0.07335	0.02271												-156.9	-0.0384294	-0.00323051	0.0470182	0.00829963	-0.0160291	0.0166708	-0.100905	0.0352218	0.0293226
-154.8	0.0096	-4.6655	-2.0379	-2.6215	12.0017	-3.1647	5.8662	5.2436	2.7281		-154.8	-0.017	0.06913	0.07471	0.01411	-0.02745	0.05581	-0.06495	0.07145	0.03973												-154.8	-0.0282094	0.0559695	0.0564982	0.0132896	-0.0220791	0.0548108	-0.0717248	0.0333218	0.0463426
-152.7	0.052	-4.7022	-2.0663	-2.5834	11.9285	-3.1854	5.9021	5.2752	2.7114		-152.7	0.02742	0.03493	0.04589	0.05249	-0.09981	0.03526	-0.02916	0.10114	0.02206												-152.7	0.0162106	0.0217695	0.0276782	0.0516696	-0.0944391	0.0342608	-0.0359348	0.0630118	0.0286726
-150.6	0.0397	-4.7122	-2.0606	-2.5715	11.9111	-3.2233	5.9705	5.2545	2.7384		-150.6	0.01715	0.02743	0.05116	0.06468	-0.11636	-0.0025	0.03912	0.07853	0.04808												-150.6	0.00594059	0.0142695	0.0329482	0.0638596	-0.110989	-0.00349917	0.0323452	0.0404018	0.0546926
-148.5	0.0068	-4.6955	-2.0464	-2.6381	11.9808	-3.1889	5.9672	5.2533	2.7165		-148.5	-0.01373	0.04662	0.06494	-0.00163	-0.04582	0.03205	0.03571	0.07543	0.0252												-148.5	-0.0249394	0.0334595	0.0467282	-0.00245037	-0.0404491	0.0310508	0.0289352	0.0373018	0.0318126
-146.4	0.0192	-4.7821	-2.0592	-2.6428	12.0435	-3.1716	5.9281	5.1866	2.7101		-146.4	0.000693821	-0.03748	0.05172	-0.00605	0.01773	0.04949	-0.00351	0.00682	0.01783												-146.4	-0.0105156	-0.0506405	0.0335082	-0.00687037	0.0231009	0.0484908	-0.0102848	-0.0313082	0.0244426
-144.3	0.0287	-4.6688	-2.0804	-2.6476	12.1654	-3.2544	5.9444	5.2121	2.7152		-144.3	0.01222	0.07832	0.03009	-0.01056	0.14047	-0.03316	0.01268	0.03041	0.02195												-144.3	0.00101059	0.0651595	0.0118782	-0.0113804	0.145841	-0.0341592	0.00590522	-0.00771821	0.0285626
-142.2	0.0219	-4.7222	-2.1045	-2.6607	12.1061	-3.2751	5.9249	5.2157	2.6959		-142.2	0.00744	0.02741	0.00557	-0.02337	0.08202	-0.05372	-0.00693	0.0321	0.00168												-142.2	-0.00376941	0.0142495	-0.0126418	-0.0241904	0.0873909	-0.0547192	-0.0137048	-0.00602821	0.0082926
-140.1	0.0329	-4.7688	-2.1144	-2.6298	12.0017	-3.1751	5.9346	5.217	2.7075		-140.1	0.02046	-0.01669	-0.00475	0.00781	-0.02154	0.04643	0.00265	0.0315	0.0123												-140.1	0.00925059	-0.0298505	-0.0229618	0.00698963	-0.0161691	0.0454308	-0.00412478	-0.00662821	0.0189126
-138	-0.0123	-4.6855	-2.0634	-2.6369	12.0504	-3.2406	5.9509	5.1915	2.7036		-138	-0.02271	0.06911	0.04582	0.000997475	0.02801	-0.01892	0.01884	0.00409	0.00742												-138	-0.0339194	0.0559495	0.0276082	0.000177109	0.0333809	-0.0199192	0.0120652	-0.0340382	0.0140326
-135.9	0	-4.7521	-2.0762	-2.6559	12.033	-3.2268	6.0161	5.1988	2.6818		-135.9	-0.00839	0.005	0.0326	-0.01772	0.01145	-0.00498	0.08392	0.00948	-0.01535												-135.9	-0.0195994	-0.00816051	0.0143882	-0.0185404	0.0168209	-0.00597917	0.0771452	-0.0286482	-0.0087374
-133.8	-0.0178	-4.7022	-2.0776	-2.625	11.8937	-3.2613	5.9998	5.2206	2.7216		-133.8	-0.02417	0.0574	0.03078	0.01347	-0.127	-0.03933	0.06751	0.02938	0.02347												-133.8	-0.0353794	0.0442395	0.0125682	0.0126496	-0.121629	-0.0403292	0.0607352	-0.00874821	0.0300826
-131.7	0.0424	-4.7122	-2.0521	-2.6096	11.9076	-3.2475	6.0096	5.2327	2.6676		-131.7	0.03806	0.0499	0.05586	0.02916	-0.11226	-0.02539	0.07719	0.03957	-0.03151												-131.7	0.0268506	0.0367395	0.0376482	0.0283396	-0.106889	-0.0263892	0.0704152	0.00144179	-0.0248974
-129.6	0.0082	-4.7388	-2.0549	-2.6535	11.9738	-3.2061	5.9379	5.2424	2.6663		-129.6	0.00588	0.02579	0.05263	-0.01446	-0.04521	0.01616	0.00538	0.04736	-0.03378												-129.6	-0.00532941	0.0126295	0.0344182	-0.0152804	-0.0398391	0.0151608	-0.00139478	0.00923179	-0.0271674
-127.5	-0.0123	-4.7122	-2.062	-2.6345	11.9877	-3.2578	5.9216	5.223	2.665		-127.5	-0.0126	0.05489	0.04511	0.00483	-0.03047	-0.0354	-0.01103	0.02605	-0.03606												-127.5	-0.0238094	0.0417295	0.0268982	0.00400963	-0.0250991	-0.0363992	-0.0178048	-0.0120782	-0.0294474
-125.4	0.0014	-4.7022	-2.0393	-2.5965	11.9459	-3.3026	5.9086	5.2109	2.6625		-125.4	0.00313	0.06739	0.06739	0.04311	-0.07142	-0.08005	-0.02415	0.01205	-0.03953												-125.4	-0.00807941	0.0542295	0.0491782	0.0422896	-0.0660491	-0.0810492	-0.0309248	-0.0260782	-0.0329174
-123.3	-0.0164	-4.6888	-2.0861	-2.6072	11.9599	-3.2268	5.9998	5.2412	2.6792		-123.3	-0.01265	0.08328	0.02016	0.0327	-0.05658	-0.00411	0.06694	0.04044	-0.02381												-123.3	-0.0238594	0.0701195	0.00194823	0.0318796	-0.0512091	-0.00510917	0.0601652	0.00231179	-0.0171974
-121.2	-0.0096	-4.7855	-2.0861	-2.6203	12.0191	-3.1647	5.9509	5.2182	2.683		-121.2	-0.00383	-0.01092	0.01974	0.01989	0.00347	0.05814	0.01792	0.01553	-0.02099												-121.2	-0.0150394	-0.0240805	0.00152823	0.0190696	0.00884094	0.0571408	0.0111452	-0.0225982	-0.0143774
-119.1	-0.0233	-4.7355	-2.0606	-2.6369	12.0226	-3.1647	5.9086	5.2339	2.6998		-119.1	-0.0155	0.04158	0.04482	0.00357	0.00781	0.05828	-0.02449	0.02932	-0.00516												-119.1	-0.0267094	0.0284195	0.0266082	0.00274963	0.0131809	0.0572808	-0.0312648	-0.00880821	0.0014526
-117	-0.0219	-4.7988	-2.0379	-2.6322	11.9668	-3.2199	5.9151	5.2351	2.7152		-117	-0.01208	-0.01923	0.06709	0.00856	-0.04714	0.00323	-0.01811	0.02862	0.00926												-117	-0.0232894	-0.0323905	0.0488782	0.00773963	-0.0417691	0.00223083	-0.0248848	-0.00950821	0.0158726
-114.9	-0.0205	-4.8121	-2.0535	-2.6286	11.9494	-3.1268	5.9509	5.2279	2.6856		-114.9	-0.00865	-0.03003	0.05107	0.01245	-0.0637	0.09648	0.01758	0.01951	-0.02132												-114.9	-0.0198594	-0.0431905	0.0328582	0.0116296	-0.0583291	0.0954808	0.0108052	-0.0186182	-0.0147074
-112.8	-0.0027	-4.8121	-2.0762	-2.6155	11.9041	-3.1682	5.9542	5.2376	2.6998		-112.8	0.01117	-0.02753	0.02795	0.02583	-0.10815	0.05522	0.02076	0.0273	-0.00809												-112.8	-3.94086e-05	-0.0406905	0.00973823	0.0250096	-0.102779	0.0542208	0.0139852	-0.0108282	-0.0014774
-110.7	0.0301	-4.6788	-2.1074	-2.6357	11.9564	-3.1889	5.9086	5.2376	2.7114		-110.7	0.04599	0.10826	-0.00368	0.00592	-0.05501	0.03467	-0.02495	0.0254	0.00253												-110.7	0.0347806	0.0950995	-0.0218918	0.00509963	-0.0496391	0.0336708	-0.0317248	-0.0127282	0.0091426
-108.6	0.0055	-4.7188	-2.1045	-2.6654	12.026	-3.2957	5.876	5.2606	2.7114		-108.6	0.02342	0.07076	-0.0012	-0.0235	0.01544	-0.07199	-0.05766	0.04649	0.00156												-108.6	0.0122106	0.0575995	-0.0194118	-0.0243204	0.0208109	-0.0729892	-0.0644348	0.00836179	0.0081726
-106.5	-0.0151	-4.7388	-2.0875	-2.6583	11.9912	-3.2337	5.9249	5.2509	2.6895		-106.5	0.00484	0.05326	0.01538	-0.01611	-0.01852	-0.00984	-0.00888	0.03488	-0.02132												-106.5	-0.00636941	0.0400995	-0.00283177	-0.0169304	-0.0131491	-0.0108392	-0.0156548	-0.00324821	-0.0147074
-104.4	0.0041	-4.7621	-2.1045	-2.6203	11.9773	-3.2992	5.9118	5.2521	2.6856		-104.4	0.02606	0.03245	-0.00205	0.02218	-0.03157	-0.0752	-0.02209	0.03417	-0.0262												-104.4	0.0148506	0.0192895	-0.0202618	0.0213596	-0.0261991	-0.0761992	-0.0288648	-0.00395821	-0.0195874
-102.3	0.0027	-4.7255	-2.0946	-2.6547	11.9877	-3.2544	5.9412	5.2764	2.6972		-102.3	0.02669	0.07155	0.00743	-0.01194	-0.02033	-0.03025	0.00719	0.05657	-0.01557												-102.3	0.0154806	0.0583895	-0.0107818	-0.0127604	-0.0149591	-0.0312492	0.000415224	0.0184418	-0.0089574
-100.2	0.0123	-4.7088	-2.0705	-2.6524	11.9599	-3.2475	5.9705	5.3079	2.6663		-100.2	0.03831	0.09075	0.03111	-0.00935	-0.04728	-0.02321	0.03638	0.08616	-0.04745												-100.2	0.0271006	0.0775895	0.0128982	-0.0101704	-0.0419091	-0.0242092	0.0296052	0.0480318	-0.0408374
-98.1	-0.011	-4.7555	-2.0677	-2.6631	12.0226	-3.2199	5.9965	5.257	2.6856		-98.1	0.01703	0.04654	0.03348	-0.01976	0.01626	0.00454	0.06226	0.03335	-0.02913												-98.1	0.00582059	0.0333795	0.0152682	-0.0205804	0.0216309	0.00354083	0.0554852	-0.00477821	-0.0225174
-96	-0.0205	-4.7655	-2.0351	-2.6559	12.0365	-3.2923	5.8695	5.2448	2.6959		-96	0.00956	0.03904	0.06566	-0.01228	0.03101	-0.06771	-0.06485	0.01924	-0.0198												-96	-0.00164941	0.0258795	0.0474482	-0.0131004	0.0363809	-0.0687092	-0.0716248	-0.0188882	-0.0131874
-93.9	-0.0041	-4.7488	-2.0507	-2.6488	11.9912	-3.244	5.8923	5.263	2.6856		-93.9	0.02798	0.05824	0.04964	-0.00489	-0.01345	-0.01927	-0.04216	0.03554	-0.03108												-93.9	0.0167706	0.0450795	0.0314282	-0.00571037	-0.00807906	-0.0202692	-0.0489348	-0.00258821	-0.0244674
-91.8	0.0151	-4.7421	-2.0833	-2.6405	11.9912	-3.2199	5.8369	5.2873	2.6895		-91.8	0.0492	0.06743	0.01661	0.00369	-0.0126	0.00498	-0.09768	0.05793	-0.02815												-91.8	0.0379906	0.0542695	-0.00160177	0.00286963	-0.00722906	0.00398083	-0.104455	0.0198018	-0.0215374
-89.7	-0.0068	-4.8121	-2.0946	-2.6654	11.9459	-3.2027	5.8402	5.3225	2.6663		-89.7	0.02933	-6.93025e-05	0.00489	-0.02092	-0.05706	0.02232	-0.09449	0.09122	-0.05233												-89.7	0.0181206	-0.0132298	-0.0133218	-0.0217404	-0.0516891	0.0213208	-0.101265	0.0530918	-0.0457174
-87.6	-0.0274	-4.8188	-2.0847	-2.6631	11.9529	-3.1992	5.7881	5.2776	2.683		-87.6	0.01075	-0.00427	0.01437	-0.01833	-0.04921	0.02597	-0.14671	0.04442	-0.03661												-87.6	-0.000459409	-0.0174305	-0.00384177	-0.0191504	-0.0438391	0.0249708	-0.153485	0.00629179	-0.0299974
-85.5	-0.0274	-4.8721	-2.0946	-2.6833	11.939	-3.1958	5.8141	5.2861	2.7075		-85.5	0.01277	-0.05508	0.00404	-0.03825	-0.06227	0.02951	-0.12082	0.05101	-0.01308												-85.5	0.00156059	-0.0682405	-0.0141718	-0.0390704	-0.0568991	0.0285108	-0.127595	0.0128818	-0.0064674
-83.4	-0.0274	-4.8555	-2.0989	-2.6868	11.9459	-3.1889	5.8532	5.2764	2.6599		-83.4	0.0148	-0.03598	-0.000680283	-0.04146	-0.05452	0.03656	-0.08184	0.0394	-0.06166												-83.4	0.00359059	-0.0491405	-0.0188921	-0.0422804	-0.0491491	0.0355608	-0.0886148	0.00127179	-0.0550474
-81.3	-0.0274	-4.8021	-2.1485	-2.6654	11.9982	-3.2406	5.8793	5.3031	2.7216		-81.3	0.01682	0.01992	-0.0507	-0.01977	-0.00138	-0.015	-0.05585	0.06419	-0.000936077												-81.3	0.00561059	0.00675949	-0.0689118	-0.0205904	0.00399094	-0.0159992	-0.0626248	0.0260618	0.00567652
-79.2	-0.0096	-4.8754	-2.1399	-2.6892	12.0365	-3.2371	5.8304	5.28	2.7229		-79.2	0.03664	-0.05089	-0.04253	-0.04329	0.03777	-0.01135	-0.10486	0.03919	-0.000612329												-79.2	0.0254306	-0.0640505	-0.0607418	-0.0441104	0.0431409	-0.0123492	-0.111635	0.00106179	0.00600027
-77.1	-0.0233	-4.8488	-2.13	-2.6547	12.0713	-3.244	5.8109	5.2497	2.741		-77.1	0.02497	-0.02179	-0.03305	-0.0085	0.07341	-0.01811	-0.12448	0.00698	0.01651												-77.1	0.0137606	-0.0349505	-0.0512618	-0.00932037	0.0787809	-0.0191092	-0.131255	-0.0311482	0.0231226
-75	-0.026	-4.8754	-2.0932	-2.6619	11.9912	-3.2302	5.8565	5.28	2.7088		-75	0.02429	-0.04589	0.00333	-0.01542	-0.00584	-0.00416	-0.07899	0.03537	-0.01666												-75	0.0130806	-0.0590505	-0.0148818	-0.0162404	-0.000469056	-0.00515917	-0.0857648	-0.00275821	-0.0100474
-72.9	-0.0246	-4.8388	-2.0762	-2.669	12.0295	-3.2233	5.9151	5.2824	2.7152		-72.9	0.02771	-0.0068	0.0199	-0.02223	0.03331	0.00289	-0.02051	0.03586	-0.01124												-72.9	0.0165006	-0.0199605	0.00168823	-0.0230504	0.0386809	0.00189083	-0.0272848	-0.00226821	-0.0046274
-70.8	-0.0452	-4.8355	-2.0818	-2.6654	11.9494	-3.2888	5.9021	5.2982	2.7307		-70.8	0.00914	-0.000998605	0.01388	-0.01834	-0.04595	-0.06247	-0.03362	0.04976	0.00328												-70.8	-0.00206941	-0.0141591	-0.00433177	-0.0191604	-0.0405791	-0.0634692	-0.0403948	0.0116318	0.0098926
-68.7	-0.0917	-4.8288	-2.0719	-2.6844	12.0156	-3.2682	5.9607	5.3067	2.7371		-68.7	-0.03534	0.0082	0.02336	-0.03706	0.0211	-0.04172	0.02486	0.05635	0.00871												-68.7	-0.0465494	-0.00496051	0.00514823	-0.0378804	0.0264709	-0.0427192	0.0180852	0.0182218	0.0153226
-66.6	-0.0753	-4.7588	-2.0521	-2.65	12.0086	-3.282	5.9216	5.2764	2.75		-66.6	-0.01692	0.08069	0.04273	-0.00237	0.01494	-0.05538	-0.01435	0.02414	0.02063												-66.6	-0.0281294	0.0675295	0.0245182	-0.00319037	0.0203109	-0.0563792	-0.0211248	-0.0139882	0.0272426
-64.5	-0.0178	-4.7855	-2.0478	-2.6428	11.925	-3.3061	5.9249	5.297	2.7049		-64.5	0.04261	0.05649	0.04661	0.00512	-0.06781	-0.07933	-0.01117	0.04284	-0.02545												-64.5	0.0314006	0.0433295	0.0283982	0.00429963	-0.0624391	-0.0803292	-0.0179448	0.00471179	-0.0188374
-62.4	-0.0287	-4.8521	-2.1074	-2.6726	11.9773	-3.2854	5.8988	5.3225	2.7165		-62.4	0.03373	-0.00761	-0.01341	-0.0244	-0.01467	-0.05849	-0.03738	0.06643	-0.01482												-62.4	0.0225206	-0.0207705	-0.0316218	-0.0252204	-0.00929906	-0.0594892	-0.0441548	0.0283018	-0.0082074
-60.3	-0.0411	-4.8321	-2.096	-2.6844	12.0017	-3.2613	6.003	5.3334	2.6818		-60.3	0.02335	0.01489	-0.00244	-0.03591	0.01058	-0.03424	0.06671	0.07542	-0.0505												-60.3	0.0121406	0.00172949	-0.0206518	-0.0367304	0.0159509	-0.0352392	0.0599352	0.0372918	-0.0438874
-58.2	-0.0835	-4.8521	-2.0748	-2.7011	12.033	-3.2888	5.9086	5.3346	2.7191		-58.2	-0.01702	-0.00262	0.01834	-0.05233	0.04272	-0.0616	-0.02781	0.07471	-0.01417												-58.2	-0.0282294	-0.0157805	0.000128229	-0.0531504	0.0480909	-0.0625992	-0.0345848	0.0365818	-0.0075574
-56.1	-0.0452	-4.9021	-2.0705	-2.6678	12.0051	-3.3199	5.8597	5.3346	2.7294		-56.1	0.0233	-0.05012	0.02222	-0.01874	0.01567	-0.09255	-0.07682	0.07281	-0.00485												-56.1	0.0120906	-0.0632805	0.00400823	-0.0195604	0.0210409	-0.0935492	-0.0835948	0.0346818	0.0017626
-54	-0.0602	-4.9388	-2.0889	-2.6547	12.0121	-3.2992	5.9021	5.3528	2.7075		-54	0.01032	-0.08432	0.00339	-0.00535	0.02351	-0.07171	-0.03454	0.0891	-0.02773												-54	-0.000889409	-0.0974805	-0.0148218	-0.00617037	0.0288809	-0.0727092	-0.0413148	0.0509718	-0.0211174
-51.9	-0.0739	-4.8754	-2.0918	-2.669	11.9912	-3.2302	6.0193	5.3528	2.7126		-51.9	-0.00135	-0.01843	7.05486e-05	-0.01937	0.00346	-0.00256	0.08255	0.08719	-0.0236												-51.9	-0.0125594	-0.0315905	-0.0181412	-0.0201904	0.00883094	-0.00355917	0.0757752	0.0490618	-0.0169874
-49.8	-0.0808	-4.8788	-2.1116	-2.6583	11.9634	-3.2096	6.0519	5.3443	2.7139		-49.8	-0.00623	-0.01933	-0.02015	-0.00838	-0.0235	0.01819	0.11503	0.07679	-0.02328												-49.8	-0.0174394	-0.0324905	-0.0383618	-0.00920037	-0.0181291	0.0171908	0.108255	0.0386618	-0.0166674
-47.7	-0.0849	-4.8854	-2.0762	-2.6333	11.9703	-3.2751	6.0519	5.3419	2.7281		-47.7	-0.00831	-0.02343	0.01482	0.0169	-0.01575	-0.04717	0.11492	0.07248	-0.01006												-47.7	-0.0195194	-0.0365905	-0.00339177	0.0160796	-0.0103791	-0.0481692	0.108145	0.0343518	-0.0034474
-45.6	-0.0753	-4.9221	-2.0733	-2.6357	12.0191	-3.2199	6.0584	5.2994	2.7538		-45.6	0.00332	-0.05764	0.0173	0.01479	0.03389	0.00818	0.12131	0.02807	0.01467												-45.6	-0.00788941	-0.0708005	-0.000911771	0.0139696	0.0392609	0.00718083	0.114535	-0.0100582	0.0212826
-43.5	-0.089	-4.8288	-2.0507	-2.65	11.9877	-3.1441	6.0421	5.3297	2.75		-43.5	-0.00836	0.03816	0.03948	0.000777402	0.00334	0.08412	0.10489	0.05646	0.00989												-43.5	-0.0195694	0.0249995	0.0212682	-4.29644e-05	0.00871094	0.0831208	0.0981152	0.0183318	0.0165026
-41.4	-0.1369	-4.8988	-2.0535	-2.6535	12.0609	-3.1785	5.9998	5.3297	2.7307		-41.4	-0.05424	-0.02934	0.03625	-0.00244	0.07738	0.04987	0.06248	0.05456	-0.01038												-41.4	-0.0654494	-0.0425005	0.0180382	-0.00326037	0.0827509	0.0488708	0.0557052	0.0164318	-0.0037674
-39.3	-0.1177	-4.8721	-2.0648	-2.6642	12.0887	-3.1613	5.9868	5.3346	2.7281		-39.3	-0.03301	-0.000147442	0.02453	-0.01285	0.10603	0.06721	0.04936	0.05755	-0.01396												-39.3	-0.0442194	-0.013308	0.00631823	-0.0136704	0.111401	0.0662108	0.0425852	0.0194218	-0.0073474
-37.2	-0.0753	-4.8621	-2.0379	-2.6607	12.0365	-3.2268	5.9965	5.3031	2.7448		-37.2	0.01141	0.01235	0.05101	-0.00906	0.05467	0.00186	0.05895	0.02414	0.00176												-37.2	0.000200591	-0.000810512	0.0327982	-0.00988037	0.0600409	0.000860826	0.0521752	-0.0139882	0.0083726
-35.1	-0.0493	-4.8321	-2.0138	-2.6298	12.0713	-3.2165	5.9379	5.2836	2.7371		-35.1	0.03944	0.04485	0.07468	0.02212	0.09032	0.0123	0.000233729	0.00273	-0.00691												-35.1	0.0282306	0.0316895	0.0564682	0.0212996	0.0956909	0.0113008	-0.00654105	-0.0353982	-0.0002974
-33	-0.0794	-4.8388	-2.0492	-2.6179	11.9425	-3.2509	6.0063	5.314	2.7474		-33	0.01136	0.04064	0.03886	0.03431	-0.03764	-0.02195	0.06852	0.03123	0.00241												-33	0.000150591	0.0274795	0.0206482	0.0334896	-0.0322691	-0.0229492	0.0617452	-0.00689821	0.0090226
-30.9	-0.0876	-4.8621	-2.1201	-2.6322	11.9564	-3.1958	5.9965	5.2994	2.741		-30.9	0.00518	0.01984	-0.03246	0.02029	-0.02266	0.0333	0.05861	0.01472	-0.00497												-30.9	-0.00602941	0.00667949	-0.0506718	0.0194696	-0.0172891	0.0323008	0.0518352	-0.0234082	0.0016426
-28.8	-0.0726	-4.9154	-2.1017	-2.6464	12.026	-3.1889	6.0324	5.3031	2.7551		-28.8	0.02221	-0.03096	-0.01449	0.00638	0.04812	0.04034	0.09439	0.01651	0.00816												-28.8	0.0110006	-0.0441205	-0.0327018	0.00555963	0.0534909	0.0393408	0.0876152	-0.0216182	0.0147726
-26.7	-0.0712	-4.8854	-2.1102	-2.6535	12.0435	-3.2268	6.0161	5.3176	2.7693		-26.7	0.02563	-0.000595981	-0.02341	-0.000432833	0.06679	0.00259	0.07798	0.02911	0.02138												-26.7	0.0144206	-0.0137565	-0.0416218	-0.0012532	0.0721609	0.00159083	0.0712052	-0.00901821	0.0279926
-24.6	-0.0548	-4.8754	-2.0861	-2.6714	12.0156	-3.1268	6.0128	5.3128	2.7693		-24.6	0.04405	0.0096	0.000267936	-0.01805	0.04007	0.10273	0.07462	0.0224	0.02041												-24.6	0.0328406	-0.00356051	-0.0179438	-0.0188704	0.0454409	0.101731	0.0678452	-0.0157282	0.0270226
-22.5	-0.0164	-4.8988	-2.1187	-2.6262	11.8832	-3.1682	6.003	5.2982	2.7937		-22.5	0.08448	-0.0136	-0.03276	0.02744	-0.09116	0.06148	0.06512	0.00589	0.04383												-22.5	0.0732706	-0.0267605	-0.0509718	0.0266196	-0.0857891	0.0604808	0.0583452	-0.0322382	0.0504426
-20.4	-0.0657	-4.8888	-2.1088	-2.6286	11.9529	-3.2061	6.0291	5.3346	2.7667		-20.4	0.0372	-0.0034	-0.02328	0.02533	-0.02028	0.02373	0.09151	0.04038	0.01585												-20.4	0.0259906	-0.0165605	-0.0414918	0.0245096	-0.0149091	0.0227308	0.0847352	0.00225179	0.0224626
-18.3	-0.089	-4.9121	-2.1159	-2.6535	11.9599	-3.1165	6.0063	5.3212	2.7654		-18.3	0.01592	-0.02651	-0.0308	0.00071205	-0.0121	0.11352	0.06901	0.02508	0.01358												-18.3	0.00471059	-0.0396705	-0.0490118	-0.000108316	-0.00672906	0.112521	0.0622352	-0.0130482	0.0201926
-16.2	-0.089	-4.8654	-2.062	-2.6452	11.9425	-3.1303	5.9607	5.3237	2.7268		-16.2	0.01788	0.02039	0.02251	0.0093	-0.02833	0.09991	0.02371	0.02567	-0.02596												-16.2	0.00667059	0.00722949	0.00429823	0.00847963	-0.0229591	0.0989108	0.0169352	-0.0124582	-0.0193474
-14.1	-0.0726	-4.9088	-2.0946	-2.6559	11.9634	-3.244	5.9086	5.3406	2.7358		-14.1	0.03613	-0.02281	-0.01092	-0.00112	-0.00625	-0.0136	-0.0281	0.04066	-0.01775												-14.1	0.0249206	-0.0359705	-0.0291318	-0.00194037	-0.000879056	-0.0145992	-0.0348748	0.00253179	-0.0111374
-12	-0.0794	-4.8321	-2.1017	-2.6547	11.9146	-3.2682	5.9998	5.3285	2.7538		-12	0.03118	0.05409	-0.01884	0.000370711	-0.05388	-0.03761	0.0634	0.027	-0.000539712												-12	0.0199706	0.0409295	-0.0370518	-0.000449655	-0.0485091	-0.0386092	0.0566252	-0.0111282	0.00607289
-9.9	-0.0972	-4.7988	-2.1017	-2.6666	11.9355	-3.2165	5.9216	5.3043	2.7538		-9.9	0.01523	0.08758	-0.01967	-0.01124	-0.0318	0.01428	-0.0145	0.00164	-0.00133												-9.9	0.00402059	0.0744195	-0.0378818	-0.0120604	-0.0264291	0.0132808	-0.0212748	-0.0364882	0.0052826
-7.8	-0.1273	-4.8321	-2.0719	-2.6642	12.0295	-3.2268	5.876	5.2812	2.7551		-7.8	-0.01302	0.05448	0.0093	-0.00864	0.06337	0.00417	-0.05981	-0.02261	-0.000824153												-7.8	-0.0242294	0.0413195	-0.00891177	-0.00946037	0.0687409	0.00317083	-0.0665848	-0.0607382	0.00578845
-5.7	-0.0917	-4.8521	-2.0634	-2.6464	12.0121	-3.1958	5.9933	5.2788	2.7796		-5.7	0.02443	0.03468	0.01697	0.00933	0.04715	0.03536	0.05779	-0.02616	0.02288												-5.7	0.0132206	0.0215195	-0.00124177	0.00850963	0.0525209	0.0343608	0.0510152	-0.0642882	0.0294926
-3.6	-0.078	-4.8421	-2.0705	-2.6286	12.033	-3.2406	5.9802	5.2703	2.759		-3.6	0.03998	0.04488	0.00905	0.02729	0.06922	-0.00925	0.04499	-0.03582	0.00149												-3.6	0.0287706	0.0317195	-0.00916177	0.0264696	0.0745909	-0.0102492	0.0382152	-0.0739482	0.0081026
-1.5	-0.1287	-4.8121	-2.0989	-2.6488	11.9982	-3.282	6.0128	5.3103	2.7538		-1.5	-0.00887	0.07507	-0.02018	0.00725	0.0356	-0.05046	0.07788	0.00303	-0.0045												-1.5	-0.0200794	0.0619095	-0.0383918	0.00642963	0.0409709	-0.0514592	0.0711052	-0.0350982	0.0021126
0.6	-0.037	-4.7855	-1.9189	-2.5834	12.0295	-3.1889	6.0096	5.3625	2.8104		0.6	0.08468	0.10187	0.15899	0.07282	0.06808	0.04283	0.07498	0.05408	0.05131												0.6	0.0734706	0.0887095	0.140778	0.0719996	0.0734509	0.0418308	0.0682052	0.0159518	0.0579226
2.7	0.0917	-4.7055	-1.7956	-2.5347	12.0678	-3.1337	5.9965	5.3892	2.9044		2.7	0.21523	0.18207	0.28146	0.12168	0.10755	0.09822	0.06218	0.07962	0.14451												2.7	0.204021	0.168909	0.263248	0.12086	0.112921	0.0972208	0.0554052	0.0414918	0.151123
4.8	0.1451	-4.6688	-1.7516	-2.4646	12.0609	-3.0958	6.0617	5.4073	2.9198		4.8	0.27048	0.21897	0.32464	0.19195	0.10183	0.13631	0.12767	0.09657	0.15912												4.8	0.259271	0.205809	0.306428	0.19113	0.107201	0.135311	0.120895	0.0584418	0.165733
6.9	0.1752	-4.6588	-1.763	-2.4503	12.0574	-3.0475	6.1105	5.4534	2.9275		6.9	0.30243	0.22916	0.31241	0.20641	0.0995	0.1848	0.17677	0.14152	0.16603												6.9	0.291221	0.215999	0.294198	0.20559	0.104871	0.183801	0.169995	0.103392	0.172643
9	0.1821	-4.6488	-1.7431	-2.4254	12.0783	-3.0303	6.1138	5.428	2.9443		9	0.31118	0.23936	0.33148	0.23148	0.12158	0.20219	0.18037	0.11496	0.18204												9	0.299971	0.226199	0.313268	0.23066	0.126951	0.201191	0.173595	0.0768318	0.188653
11.1	0.1903	-4.6255	-1.6992	-2.4171	12.1375	-3.051	6.1333	5.4668	2.9597		11.1	0.32123	0.26286	0.37455	0.23994	0.18195	0.18167	0.20016	0.15261	0.19665												11.1	0.310021	0.249699	0.356338	0.23912	0.187321	0.180671	0.193385	0.114482	0.203263
13.2	0.1889	-4.6355	-1.7091	-2.3921	12.134	-3.0682	6.0454	5.4425	2.9854		13.2	0.32168	0.25306	0.36383	0.2651	0.17963	0.16466	0.11256	0.12716	0.22155												13.2	0.310471	0.239899	0.345618	0.26428	0.185001	0.163661	0.105785	0.0890318	0.228163
15.3	0.1793	-4.5155	-1.6893	-2.4147	12.1584	-3.0475	6.1268	5.4801	2.9546		15.3	0.31393	0.37325	0.3828	0.24267	0.2052	0.18555	0.19426	0.1636	0.18996												15.3	0.302721	0.360089	0.364588	0.24185	0.210571	0.184551	0.187485	0.125472	0.196573
17.4	0.1889	-4.5022	-1.7077	-2.4337	12.1584	-3.0337	6.1626	5.4522	2.9674		17.4	0.32538	0.38675	0.36357	0.22383	0.20638	0.19954	0.23035	0.13455	0.20197												17.4	0.314171	0.373589	0.345358	0.22301	0.211751	0.198541	0.223575	0.0964218	0.208583
19.5	0.2108	-4.5589	-1.7063	-2.4325	12.1375	-3.0062	6.1626	5.4595	2.979		19.5	0.34913	0.33025	0.36414	0.2252	0.18665	0.22723	0.23065	0.1407	0.21278												19.5	0.337921	0.317089	0.345928	0.22438	0.192021	0.226231	0.223875	0.102572	0.219393
21.6	0.1561	-4.5889	-1.6609	-2.4337	12.2176	-2.9993	6.1496	5.4583	2.9713		21.6	0.29628	0.30045	0.40872	0.22416	0.26793	0.23432	0.21795	0.13834	0.20428												21.6	0.285071	0.287289	0.390508	0.22334	0.273301	0.233321	0.211175	0.100212	0.210893
23.7	0.1793	-4.6155	-1.6779	-2.4171	12.2246	-2.9682	6.1073	5.434	2.9571		23.7	0.32133	0.27404	0.39089	0.24093	0.27611	0.26561	0.17594	0.11289	0.18929												23.7	0.310121	0.260879	0.372678	0.24011	0.281481	0.264611	0.169165	0.0747618	0.195903
25.8	0.1793	-4.5689	-1.6822	-2.3921	12.1967	-3.0165	6.1496	5.4195	2.9803		25.8	0.32318	0.32084	0.38576	0.26609	0.24938	0.2175	0.21854	0.09724	0.2117												25.8	0.311971	0.307679	0.367548	0.26527	0.254751	0.216501	0.211765	0.0591118	0.218313
27.9	0.1506	-4.5789	-1.6978	-2.4254	12.1514	-2.9751	6.2115	5.451	2.9752		27.9	0.29633	0.31104	0.36933	0.23295	0.20526	0.25909	0.28074	0.12758	0.20581												27.9	0.285121	0.297879	0.351118	0.23213	0.210631	0.258091	0.273965	0.0894518	0.212423
30	0.1875	-4.5689	-1.6992	-2.4278	12.1793	-2.9544	6.1398	5.4401	2.9507		30	0.33508	0.32124	0.36711	0.23072	0.23433	0.27998	0.20933	0.11553	0.18052												30	0.323871	0.308079	0.348898	0.2299	0.239701	0.278981	0.202555	0.0774018	0.187133
32.1	0.1821	-4.5855	-1.6879	-2.4717	12.2037	-3.0475	6.0942	5.4328	2.9636		32.1	0.33153	0.30483	0.37758	0.18698	0.25991	0.18707	0.16403	0.10707	0.19262												32.1	0.320321	0.291669	0.359368	0.18616	0.265281	0.186071	0.157255	0.0689418	0.199233
34.2	0.178	-4.6188	-1.6893	-2.4301	12.2141	-2.9751	6.0454	5.4219	2.9752		34.2	0.32928	0.27173	0.37535	0.22875	0.27148	0.25966	0.11553	0.09502	0.20343												34.2	0.318071	0.258569	0.357138	0.22793	0.276851	0.258661	0.108755	0.0568918	0.210043
36.3	0.1752	-4.6355	-1.7332	-2.4183	12.1096	-2.9544	6.0128	5.4425	2.9597		36.3	0.32833	0.25523	0.33062	0.24071	0.16816	0.28055	0.08322	0.11447	0.18714												36.3	0.317121	0.242069	0.312408	0.23989	0.173531	0.279551	0.0764452	0.0763418	0.193753
38.4	0.1656	-4.6022	-1.7488	-2.4373	12.0609	-2.9717	6.0942	5.4668	2.9456		38.4	0.32058	0.28873	0.3142	0.22188	0.12063	0.26344	0.16492	0.13761	0.17225												38.4	0.309371	0.275569	0.295988	0.22106	0.126001	0.262441	0.158145	0.0994818	0.178863
40.5	0.1643	-4.5955	-1.7162	-2.4206	11.9947	-3.0854	6.1203	5.4595	2.9443		40.5	0.32113	0.29562	0.34597	0.23874	0.05561	0.14993	0.19132	0.12916	0.17015												40.5	0.309921	0.282459	0.327758	0.23792	0.0609809	0.148931	0.184545	0.0910318	0.176763
42.6	0.1287	-4.6288	-1.7105	-2.4361	12.0435	-3.0992	6.091	5.4377	2.9739		42.6	0.28738	0.26252	0.35084	0.2234	0.10559	0.13632	0.16231	0.10621	0.19896												42.6	0.276171	0.249359	0.332628	0.22258	0.110961	0.135321	0.155535	0.0680818	0.205573
44.7	0.1218	-4.6655	-1.668	-2.4337	11.9634	-3.0648	6.0877	5.4207	3.0086		44.7	0.28234	0.22602	0.39251	0.22597	0.02666	0.17091	0.15931	0.08805	0.23287												44.7	0.271131	0.212859	0.374298	0.22515	0.0320309	0.169911	0.152535	0.0499218	0.239483
46.8	0.141	-4.6088	-1.6822	-2.4325	12.0678	-3.0475	6.0747	5.4777	2.9932		46.8	0.30339	0.28292	0.37749	0.22733	0.13224	0.1884	0.14661	0.1439	0.21668												46.8	0.292181	0.269759	0.359278	0.22651	0.137611	0.187401	0.139835	0.105772	0.223293
48.9	0.1821	-4.5889	-1.7205	-2.4183	12.0644	-3.0544	6.1333	5.4837	2.9854		48.9	0.34634	0.30301	0.33836	0.2417	0.13001	0.18169	0.20551	0.14875	0.20809												48.9	0.335131	0.289849	0.320148	0.24088	0.135381	0.180691	0.198735	0.110622	0.214703
51	0.1602	-4.6088	-1.6935	-2.467	12.0644	-3.0337	6.104	5.4643	2.9559		51	0.32629	0.28331	0.36453	0.19316	0.13119	0.20258	0.1765	0.12819	0.17779												51	0.315081	0.270149	0.346318	0.19234	0.136561	0.201581	0.169725	0.0900618	0.184403
53.1	0.1478	-4.6288	-1.6964	-2.4646	12.0783	-2.9958	6.0877	5.4389	2.9854		53.1	0.31574	0.26351	0.3608	0.19573	0.14626	0.24067	0.1605	0.10164	0.2065												53.1	0.304531	0.250349	0.342588	0.19491	0.151631	0.239671	0.153725	0.0635118	0.213113
55.2	0.1328	-4.6455	-1.7318	-2.4587	12.0783	-3.1027	6.0617	5.4316	3.0009		55.2	0.30259	0.24701	0.32458	0.20179	0.14744	0.13396	0.1348	0.09319	0.22121												55.2	0.291381	0.233849	0.306368	0.20097	0.152811	0.132961	0.128025	0.0550618	0.227823
57.3	0.1602	-4.6588	-1.7233	-2.448	12.141	-3.0475	6.003	5.485	2.9957		57.3	0.33184	0.2339	0.33225	0.21266	0.21131	0.18935	0.07639	0.14543	0.21522												57.3	0.320631	0.220739	0.314038	0.21184	0.216681	0.188351	0.0696152	0.107302	0.221833
59.4	0.1588	-4.5955	-1.729	-2.4539	12.1479	-3.0854	6.0291	5.4922	2.9739		59.4	0.33229	0.2974	0.32572	0.20692	0.21939	0.15164	0.10279	0.15148	0.19262												59.4	0.321081	0.284239	0.307508	0.2061	0.224761	0.150641	0.0960152	0.113352	0.199233
61.5	0.1561	-4.6522	-1.7346	-2.4408	12.1166	-3.0579	6.1105	5.4837	2.961		61.5	0.33144	0.2409	0.31929	0.22018	0.18927	0.17932	0.18449	0.14183	0.17893												61.5	0.320231	0.227739	0.301078	0.21936	0.194641	0.178321	0.177715	0.103702	0.185543
63.6	0.1081	-4.7355	-1.6964	-2.4456	12.0957	-3.0131	6.1105	5.4765	2.952		63.6	0.28529	0.1578	0.35667	0.21555	0.16954	0.22431	0.18478	0.13347	0.16914												63.6	0.274081	0.144639	0.338458	0.21473	0.174911	0.223311	0.178005	0.0953418	0.175753
65.7	0.1561	-4.6888	-1.7247	-2.4278	12.1027	-3.0096	6.0877	5.4631	2.9816		65.7	0.33514	0.20469	0.32754	0.23351	0.17772	0.228	0.16228	0.11892	0.19795												65.7	0.323931	0.191529	0.309328	0.23269	0.183091	0.227001	0.155505	0.0807918	0.204563
67.8	0.1766	-4.6688	-1.7134	-2.4408	12.1514	-3.0268	6.0258	5.4947	2.961		67.8	0.35749	0.22489	0.33801	0.22068	0.22759	0.21099	0.10068	0.14937	0.17656												67.8	0.346281	0.211729	0.319798	0.21986	0.232961	0.209991	0.0939052	0.111242	0.183173
69.9	0.1246	-4.6022	-1.702	-2.4634	12.1027	-3.1199	6.091	5.4704	2.9803		69.9	0.30734	0.29169	0.34858	0.19824	0.18007	0.11808	0.16617	0.12391	0.19506												69.9	0.296131	0.278529	0.330368	0.19742	0.185441	0.117081	0.159395	0.0857818	0.201673
72	0.1232	-4.6122	-1.7247	-2.4777	12.0887	-2.9717	6.0942	5.4862	2.9945		72	0.30779	0.28189	0.32506	0.18411	0.16724	0.26647	0.16967	0.13856	0.20847												72	0.296581	0.268729	0.306848	0.18329	0.172611	0.265471	0.162895	0.100432	0.215083
74.1	0.167	-4.6055	-1.7205	-2.4729	12.0887	-2.9786	6.078	5.4862	3.0138		74.1	0.35344	0.28878	0.32843	0.18907	0.16842	0.25976	0.15377	0.1374	0.22698												74.1	0.342231	0.275619	0.310218	0.18825	0.173791	0.258761	0.146995	0.0992718	0.233593
76.2	0.1725	-4.5988	-1.7219	-2.4016	12.1131	-3.1165	6.0617	5.5165	2.9932		76.2	0.36079	0.29568	0.3262	0.26053	0.19399	0.12205	0.13776	0.16655	0.20559												76.2	0.349581	0.282519	0.307988	0.25971	0.199361	0.121051	0.130985	0.128422	0.212203
78.3	0.1164	-4.6122	-1.7275	-2.4254	12.0957	-3.1303	6.0193	5.5092	2.9713		78.3	0.30654	0.28248	0.31977	0.2369	0.17777	0.10844	0.09566	0.1581	0.18289												78.3	0.295331	0.269319	0.301558	0.23608	0.183141	0.107441	0.0888852	0.119972	0.189503
80.4	0.1081	-4.5789	-1.6907	-2.4741	12.04	-3.0992	6.1366	5.5116	2.9867		80.4	0.30009	0.31598	0.35574	0.18836	0.12325	0.13973	0.21326	0.15934	0.1975												80.4	0.288881	0.302819	0.337528	0.18754	0.128621	0.138731	0.206485	0.121212	0.204113
82.5	0.0986	-4.5822	-1.6751	-2.4812	12.0852	-3.0544	6.0975	5.4619	2.9443		82.5	0.29244	0.31287	0.37052	0.18143	0.16962	0.18472	0.17445	0.10849	0.15431												82.5	0.281231	0.299709	0.352308	0.18061	0.174991	0.183721	0.167675	0.0703618	0.160923
84.6	0.1287	-4.6522	-1.6964	-2.4694	12.0539	-3.1372	6.1073	5.4668	2.9816		84.6	0.32439	0.24307	0.34839	0.19339	0.1395	0.10211	0.18455	0.11224	0.19082												84.6	0.313181	0.229909	0.330178	0.19257	0.144871	0.101111	0.177775	0.0741118	0.197433
86.7	0.1396	-4.6922	-1.7006	-2.4373	12.0818	-3.1923	6.1366	5.4825	2.9906		86.7	0.33714	0.20327	0.34336	0.22566	0.16857	0.0472	0.21415	0.12678	0.19903												86.7	0.325931	0.190109	0.325148	0.22484	0.173941	0.0462008	0.207375	0.0886518	0.205643
88.8	0.1533	-4.6755	-1.7318	-2.4527	12.0992	-3.1613	6.2115	5.531	2.9623		88.8	0.35269	0.22017	0.31133	0.21042	0.18715	0.07839	0.28934	0.17413	0.16993												88.8	0.341481	0.207009	0.293118	0.2096	0.192521	0.0773908	0.282565	0.136002	0.176543
90.9	0.1314	-4.6522	-1.7148	-2.4896	12.1828	-3.1854	6.1626	5.508	2.9378		90.9	0.33264	0.24366	0.32751	0.17368	0.27192	0.05448	0.24074	0.14998	0.14464												90.9	0.321431	0.230499	0.309298	0.17286	0.277291	0.0534808	0.233965	0.111852	0.151253
93	0.1218	-4.5622	-1.7176	-2.4777	12.127	-3.2027	6.1138	5.5092	2.9391		93	0.32489	0.33386	0.32388	0.18575	0.2173	0.03737	0.19224	0.15002	0.14515												93	0.313681	0.320699	0.305668	0.18493	0.222671	0.0363708	0.185465	0.111892	0.151763
95.1	0.1246	-4.6222	-1.7318	-2.461	12.0852	-3.1682	6.1138	5.5165	2.9134		95.1	0.32954	0.27406	0.30885	0.20261	0.17667	0.07206	0.19253	0.15617	0.11866												95.1	0.318331	0.260899	0.290638	0.20179	0.182041	0.0710608	0.185755	0.118042	0.125273
97.2	0.1122	-4.6188	-1.7332	-2.4373	12.0748	-3.1406	6.1268	5.4886	2.9057		97.2	0.31899	0.27766	0.30662	0.22648	0.16745	0.09985	0.20583	0.12712	0.11016												97.2	0.307781	0.264499	0.288408	0.22566	0.172821	0.0988508	0.199055	0.0889918	0.116773
99.3	0.104	-4.6722	-1.7545	-2.4575	12.0469	-3.2578	6.1529	5.5165	2.9224		99.3	0.31264	0.22445	0.2845	0.20644	0.14072	-0.01716	0.23223	0.15386	0.12607												99.3	0.301431	0.211289	0.266288	0.20562	0.146091	-0.0181592	0.225455	0.115732	0.132683
101.4	0.0945	-4.6822	-1.746	-2.4872	12.0713	-3.1441	6.1105	5.4716	2.8967		101.4	0.30499	0.21465	0.29217	0.17691	0.1663	0.09673	0.19012	0.10781	0.09958												101.4	0.293781	0.201489	0.273958	0.17609	0.171671	0.0957308	0.183345	0.0696818	0.106193
103.5	0.0903	-4.6888	-1.6964	-2.4658	11.9947	-3.0854	6.0649	5.4789	2.9533		103.5	0.30264	0.20825	0.34094	0.19847	0.09088	0.15562	0.14482	0.11396	0.15539												103.5	0.291431	0.195089	0.322728	0.19765	0.0962509	0.154621	0.138045	0.0758318	0.162003
105.6	0.0972	-4.6722	-1.7176	-2.4313	11.9877	-3.0406	6.0845	5.4619	2.9288		105.6	0.31139	0.22505	0.31891	0.23313	0.08505	0.20061	0.16472	0.0958	0.1301												105.6	0.300181	0.211889	0.300698	0.23231	0.0904209	0.199611	0.157945	0.0576718	0.136713
107.7	0.1164	-4.6555	-1.7375	-2.448	11.9982	-3.1268	6.104	5.5092	2.9121		107.7	0.33245	0.24194	0.29819	0.2166	0.09673	0.1146	0.18451	0.14195	0.1126												107.7	0.321241	0.228779	0.279978	0.21578	0.102101	0.113601	0.177735	0.103822	0.119213
109.8	0.1095	-4.6022	-1.7446	-2.4527	11.9703	-3.1578	6.117	5.4874	2.8902		109.8	0.3274	0.29544	0.29026	0.21206	0.07	0.08379	0.19781	0.119	0.08991												109.8	0.316191	0.282279	0.272048	0.21124	0.0753709	0.0827908	0.191035	0.0808718	0.0965226
111.9	0.0986	-4.6622	-1.6723	-2.4824	12.0957	-3.1613	6.0877	5.4704	2.9378		111.9	0.31835	0.23564	0.36173	0.18253	0.19658	0.08047	0.16881	0.10084	0.13672												111.9	0.307141	0.222479	0.343518	0.18171	0.201951	0.0794708	0.162035	0.0627118	0.143333
114	0.0972	-4.6855	-1.6496	-2.461	12.0852	-3.2475	5.9802	5.4728	2.9456		114	0.3188	0.21254	0.3836	0.20409	0.18725	-0.00554	0.0616	0.10209	0.14373												114	0.307591	0.199379	0.365388	0.20327	0.192621	-0.00653917	0.0548252	0.0639618	0.150343
116.1	0.1095	-4.6855	-1.6737	-2.4503	12.0504	-3.113	6.0258	5.4668	2.9288		116.1	0.33295	0.21273	0.35868	0.21496	0.15363	0.12915	0.1075	0.09493	0.12613												116.1	0.321741	0.199569	0.340468	0.21414	0.159001	0.128151	0.100725	0.0568018	0.132743
118.2	0.1259	-4.6555	-1.7077	-2.4313	12.0539	-3.1441	6.003	5.5019	2.9443		118.2	0.3512	0.24293	0.32385	0.23412	0.1583	0.09824	0.085	0.12888	0.14084												118.2	0.339991	0.229769	0.305638	0.2333	0.163671	0.0972408	0.0782252	0.0907518	0.147453
120.3	0.0931	-4.7222	-1.7035	-2.4468	12.0574	-3.1406	6.0747	5.4922	2.9559		120.3	0.32025	0.17643	0.32722	0.21878	0.16298	0.10193	0.15699	0.11803	0.15165												120.3	0.309041	0.163269	0.309008	0.21796	0.168351	0.100931	0.150215	0.0799018	0.158263
122.4	0.1177	-4.7788	-1.7077	-2.4694	12.0852	-3.1889	6.0389	5.5177	2.9211		122.4	0.3467	0.12003	0.32219	0.19635	0.19196	0.05382	0.12149	0.14237	0.11606												122.4	0.335491	0.106869	0.303978	0.19553	0.197331	0.0528208	0.114715	0.104242	0.122673
124.5	0.0958	-4.6688	-1.6978	-2.4468	12.134	-3.1406	6.0193	5.5128	2.9237		124.5	0.32665	0.23022	0.33127	0.21911	0.24193	0.10231	0.10219	0.13632	0.11787												124.5	0.315441	0.217059	0.313058	0.21829	0.247301	0.101311	0.0954152	0.0981918	0.124483
126.6	0.1068	-4.6422	-1.7275	-2.4634	12.0435	-3.1889	6.0649	5.5286	2.9456		126.6	0.3395	0.25702	0.30074	0.20268	0.15261	0.0542	0.14808	0.15097	0.13897												126.6	0.328291	0.243859	0.282528	0.20186	0.157981	0.0532008	0.141305	0.112842	0.145583
128.7	0.1246	-4.6755	-1.7346	-2.4468	12.0226	-3.2096	6.1692	5.531	2.9404		128.7	0.35915	0.22392	0.29281	0.21944	0.13288	0.03369	0.25268	0.15221	0.13298												128.7	0.347941	0.210759	0.274598	0.21862	0.138251	0.0326908	0.245905	0.114082	0.139593
130.8	0.1054	-4.7088	-1.7205	-2.4824	12.0748	-3.2751	6.0747	5.5031	2.9353		130.8	0.3418	0.19082	0.30608	0.18401	0.18626	-0.03162	0.15848	0.12316	0.12709												130.8	0.330591	0.177659	0.287868	0.18319	0.191631	-0.0326192	0.151705	0.0850318	0.133703
132.9	0.0849	-4.6488	-1.7162	-2.5157	12.0365	-3.2371	6.0714	5.5189	2.9494		132.9	0.32315	0.25101	0.30956	0.15087	0.14913	0.00657	0.15547	0.13781	0.1404												132.9	0.311941	0.237849	0.291348	0.15005	0.154501	0.00557083	0.148695	0.0996818	0.147013
135	0.063	-4.7755	-1.7247	-2.4765	12.0504	-3.2302	5.9542	5.4801	2.9546		135	0.3031	0.12451	0.30023	0.19023	0.16421	0.01366	0.03857	0.09785	0.1448												135	0.291891	0.111349	0.282018	0.18941	0.169581	0.0126608	0.0317952	0.0597218	0.151413
137.1	0.0931	-4.6855	-1.7077	-2.442	11.9564	-3.2751	6.091	5.5068	2.9404		137.1	0.33505	0.21471	0.3164	0.2249	0.07138	-0.03105	0.17567	0.1234	0.12981												137.1	0.323841	0.201549	0.298188	0.22408	0.0767509	-0.0320492	0.168895	0.0852718	0.136423
139.2	0.104	-4.6888	-1.7261	-2.4646	11.8972	-3.1785	6.0975	5.4753	2.9559		139.2	0.3478	0.21161	0.29717	0.20246	0.01336	0.06574	0.18246	0.09075	0.14452												139.2	0.336591	0.198449	0.278958	0.20164	0.0187309	0.0647408	0.175685	0.0526218	0.151133
141.3	0.0972	-4.6988	-1.7063	-2.4991	11.9842	-3.2647	6.104	5.4668	2.9391		141.3	0.34285	0.2018	0.31615	0.16813	0.10154	-0.02027	0.18926	0.08109	0.12693												141.3	0.331641	0.188639	0.297938	0.16731	0.106911	-0.0212692	0.182485	0.0429618	0.133543
143.4	0.0657	-4.7122	-1.6865	-2.505	12.0156	-3.2613	6.0812	5.4571	2.934		143.4	0.3132	0.1886	0.33512	0.16239	0.13411	-0.01668	0.16676	0.07024	0.12104												143.4	0.301991	0.175439	0.316908	0.16157	0.139481	-0.0176792	0.159985	0.0321118	0.127653
145.5	0.078	-4.7355	-1.6779	-2.4705	11.9842	-3.182	6.1268	5.4655	2.9468		145.5	0.32735	0.1655	0.34289	0.19706	0.10389	0.06281	0.21265	0.07749	0.13304												145.5	0.316141	0.152339	0.324678	0.19624	0.109261	0.0618108	0.205875	0.0393618	0.139653
147.6	0.0931	-4.7155	-1.7474	-2.4836	11.9912	-3.1578	6.1398	5.485	2.943		147.6	0.3443	0.1857	0.27256	0.18412	0.11206	0.0872	0.22595	0.09583	0.12845												147.6	0.333091	0.172539	0.254348	0.1833	0.117431	0.0862008	0.219175	0.0577018	0.135063
149.7	0.0534	-4.7155	-1.6779	-2.5252	12.033	-3.2027	6.0812	5.4947	2.943		149.7	0.30645	0.18589	0.34124	0.14268	0.15504	0.04249	0.16765	0.10438	0.12766												149.7	0.295241	0.172729	0.323028	0.14186	0.160411	0.0414908	0.160875	0.0662518	0.134273
151.8	0.0137	-4.7488	-1.6964	-2.5335	12.033	-3.2233	6.0617	5.5177	2.9314		151.8	0.2686	0.15279	0.32191	0.13455	0.15621	0.02208	0.14845	0.12623	0.11527												151.8	0.257391	0.139629	0.303698	0.13373	0.161581	0.0210808	0.141675	0.0881018	0.121883
153.9	0.0561	-4.8055	-1.7304	-2.4896	12.0017	-3.2716	6.0812	5.5286	2.9237		153.9	0.31285	0.09629	0.28708	0.17861	0.12609	-0.02603	0.16824	0.13597	0.10677												153.9	0.301641	0.0831295	0.268868	0.17779	0.131461	-0.0270292	0.161465	0.0978418	0.113383
156	0.0643	-4.7821	-1.6978	-2.4753	11.9146	-3.2475	6.0552	5.4983	2.9301		156	0.3229	0.11989	0.31885	0.19308	0.04016	-0.00174	0.14254	0.10452	0.11238												156	0.311691	0.106729	0.300638	0.19226	0.0455309	-0.00273917	0.135765	0.0663918	0.118993
158.1	0.0424	-4.7588	-1.7176	-2.4955	11.8624	-3.2233	6.1268	5.5335	2.9121		158.1	0.30285	0.14338	0.29823	0.17304	-0.01086	0.02265	0.21444	0.13856	0.09359												158.1	0.291641	0.130219	0.280018	0.17222	-0.00548906	0.0216508	0.207665	0.100432	0.100203
160.2	0.0726	-4.7488	-1.7545	-2.5311	11.9285	-3.2475	6.0454	5.5565	2.9134		160.2	0.3349	0.15358	0.2605	0.13761	0.05642	-0.00136	0.13333	0.16041	0.0941												160.2	0.323691	0.140419	0.242288	0.13679	0.0617909	-0.00235917	0.126555	0.122282	0.100713
162.3	0.0753	-4.7621	-1.712	-2.5335	11.9808	-3.2578	6.0519	5.5286	2.9018		162.3	0.33945	0.14048	0.30217	0.13537	0.10989	-0.01148	0.14013	0.13136	0.08171												162.3	0.328241	0.127319	0.283958	0.13455	0.115261	-0.0124792	0.133355	0.0932318	0.0883226
164.4	0.0356	-4.8288	-1.7275	-2.5026	11.9494	-3.1958	6.0096	5.5189	2.9546		164.4	0.3016	0.07398	0.28584	0.16644	0.07967	0.05071	0.09813	0.1205	0.13371												164.4	0.290391	0.0608195	0.267628	0.16562	0.0850409	0.0497108	0.0913552	0.0823718	0.140323
166.5	0.0383	-4.7488	-1.712	-2.5109	11.8798	-3.2061	6.0714	5.5553	2.9365		166.5	0.30615	0.15417	0.30052	0.1583	0.01124	0.0406	0.16022	0.15575	0.11482												166.5	0.294941	0.141009	0.282308	0.15748	0.0166109	0.0396008	0.153445	0.117622	0.121433
168.6	0.0041	-4.7022	-1.7247	-2.524	11.9007	-3.2302	6.1464	5.5541	2.9468		168.6	0.2738	0.20097	0.28699	0.14536	0.03332	0.01669	0.23552	0.1534	0.12433												168.6	0.262591	0.187809	0.268778	0.14454	0.0386909	0.0156908	0.228745	0.115272	0.130943
170.7	0.0301	-4.7655	-1.7077	-2.5561	11.9459	-3.2268	6.0421	5.525	2.9417		170.7	0.30166	0.13787	0.30316	0.11343	0.07969	0.02028	0.13152	0.12314	0.11844												170.7	0.290451	0.124709	0.284948	0.11261	0.0850609	0.0192808	0.124745	0.0850118	0.125053
172.8	0.0246	-4.7022	-1.6978	-2.5311	11.9111	-3.2406	6.0421	5.4668	2.9288		172.8	0.29801	0.20137	0.31223	0.13859	0.04607	0.00667	0.13181	0.06379	0.10474												172.8	0.286801	0.188209	0.294018	0.13777	0.0514409	0.00567083	0.125035	0.0256618	0.111353
174.9	0.0123	-4.7921	-1.7247	-2.4753	11.9355	-3.1923	6.0714	5.4765	2.9378		174.9	0.28756	0.11166	0.28451	0.19456	0.07164	0.05516	0.16141	0.07234	0.11295												174.9	0.276351	0.0984995	0.266298	0.19374	0.0770109	0.0541608	0.154635	0.0342118	0.119563
177	0.0164	-4.8021	-1.7757	-2.4848	11.9355	-3.2578	6.0226	5.4898	2.9378		177	0.29351	0.10186	0.23268	0.18522	0.07282	-0.01015	0.11291	0.08448	0.11216												177	0.282301	0.0886995	0.214468	0.1844	0.0781909	-0.0111492	0.106135	0.0463518	0.118773
179.1	-0.0014	-4.7855	-1.7715	-2.5157	11.9634	-3.1958	6.0063	5.5153	2.9121		179.1	0.27756	0.11866	0.23605	0.15449	0.10189	0.05204	0.0969	0.10883	0.08567												179.1	0.266351	0.105499	0.217838	0.15367	0.107261	0.0510408	0.0901252	0.0707018	0.0922826
181.2	-0.0274	-4.7655	-1.7389	-2.5228	11.925	-3.1958	6.0486	5.5189	2.9391		181.2	0.25341	0.13886	0.26782	0.14755	0.06467	0.05223	0.1395	0.11128	0.11188												181.2	0.242201	0.125699	0.249608	0.14673	0.0700409	0.0512308	0.132725	0.0731518	0.118493
183.3	0.0137	-4.7755	-1.7105	-2.5098	12.033	-3.2165	5.9933	5.5286	2.9327		183.3	0.29636	0.12905	0.2954	0.16071	0.17385	0.03172	0.0845	0.11982	0.10468												183.3	0.285151	0.115889	0.277188	0.15989	0.179221	0.0307208	0.0777252	0.0816918	0.111293
185.4	-0.011	-4.7788	-1.7105	-2.5062	11.9599	-3.1854	6.0552	5.5371	2.9481		185.4	0.27351	0.12595	0.29457	0.16448	0.10192	0.06301	0.14669	0.12717	0.11929												185.4	0.262301	0.112789	0.276358	0.16366	0.107291	0.0620108	0.139915	0.0890418	0.125903
187.5	0.0151	-4.7821	-1.7474	-2.5335	11.939	-3.2371	6.0519	5.565	2.9417		187.5	0.30146	0.12285	0.25684	0.13734	0.0822	0.0115	0.14369	0.15392	0.1121												187.5	0.290251	0.109689	0.238628	0.13652	0.0875709	0.0105008	0.136915	0.115792	0.118713
189.6	-0.0096	-4.7255	-1.7417	-2.5371	11.8937	-3.2302	6.0552	5.5553	2.9391		189.6	0.27861	0.17965	0.26171	0.13391	0.03807	0.01859	0.14729	0.14306	0.10871												189.6	0.267401	0.166489	0.243498	0.13309	0.0434409	0.0175908	0.140515	0.104932	0.115323
191.7	-0.0123	-4.7588	-1.7219	-2.5347	11.9007	-3.2544	5.9802	5.5359	2.9481		191.7	0.27776	0.14654	0.28069	0.13647	0.04625	-0.00542	0.07258	0.12251	0.11691												191.7	0.266551	0.133379	0.262478	0.13565	0.0516209	-0.00641917	0.0658052	0.0843818	0.123523
193.8	-0.0287	-4.7855	-1.7417	-2.4979	11.8832	-3.2371	5.9835	5.5128	2.9623		193.8	0.26321	0.12004	0.26006	0.17344	0.02992	0.01207	0.07618	0.09826	0.13032												193.8	0.252001	0.106879	0.241848	0.17262	0.0352909	0.0110708	0.0694052	0.0601318	0.136933
195.9	-0.0137	-4.8221	-1.7346	-2.5181	11.8658	-3.2647	5.9835	5.525	3.006		195.9	0.28006	0.08364	0.26633	0.1534	0.0137	-0.01534	0.07648	0.1093	0.17323												195.9	0.268851	0.0704795	0.248118	0.15258	0.0190709	-0.0163392	0.0697052	0.0711718	0.179843
198	-0.0041	-4.7555	-1.7545	-2.5205	11.8345	-3.2854	5.9998	5.548	2.9687		198	0.29151	0.15044	0.2456	0.15116	-0.01643	-0.03585	0.09307	0.13115	0.13514												198	0.280301	0.137279	0.227388	0.15034	-0.0110591	-0.0368492	0.0862952	0.0930218	0.141753
200.1	-0.0123	-4.7621	-1.7176	-2.5193	11.8624	-3.2061	5.9249	5.5068	2.9661		200.1	0.28516	0.14403	0.28168	0.15253	0.01265	0.04364	0.01847	0.08879	0.13175												200.1	0.273951	0.130869	0.263468	0.15171	0.0180209	0.0426408	0.0116952	0.0506618	0.138363
202.2	-0.0164	-4.7355	-1.7134	-2.5478	11.939	-3.1682	5.9737	5.5116	2.9893		202.2	0.28291	0.17083	0.28505	0.12419	0.09043	0.08173	0.06757	0.09244	0.15415												202.2	0.271701	0.157669	0.266838	0.12337	0.0958009	0.0807308	0.0607952	0.0543118	0.160763
204.3	-0.0287	-4.7921	-1.7318	-2.5181	11.9355	-3.1854	5.9379	5.5238	2.9803		204.3	0.27246	0.11443	0.26582	0.15406	0.0881	0.06472	0.03206	0.10349	0.14436												204.3	0.261251	0.101269	0.247608	0.15324	0.0934709	0.0637208	0.0252852	0.0653618	0.150973
206.4	0.0068	-4.8121	-1.7346	-2.5347	11.9111	-3.2371	5.889	5.5395	2.9906		206.4	0.30981	0.09463	0.26219	0.13762	0.06488	0.01321	-0.01654	0.11803	0.15387												206.4	0.298601	0.0814695	0.243978	0.1368	0.0702509	0.0122108	-0.0233148	0.0799018	0.160483
208.5	0.0123	-4.7521	-1.7006	-2.5442	11.9529	-3.2475	5.9835	5.5383	2.9842		208.5	0.31716	0.15482	0.29537	0.12829	0.10785	0.003	0.07826	0.11568	0.14668												208.5	0.305951	0.141659	0.277158	0.12747	0.113221	0.00200083	0.0714852	0.0775518	0.153293
210.6	-0.0205	-4.7022	-1.7304	-2.5751	11.9355	-3.1475	5.9542	5.5347	2.9713		210.6	0.28621	0.20492	0.26474	0.09755	0.09163	0.10319	0.04925	0.11093	0.13298												210.6	0.275001	0.191759	0.246528	0.0967296	0.0970009	0.102191	0.0424752	0.0728018	0.139593
212.7	-0.0219	-4.7755	-1.7502	-2.5799	11.9529	-3.1854	5.9705	5.5201	2.9764		212.7	0.28666	0.13182	0.24411	0.09291	0.1102	0.06547	0.06585	0.09517	0.13729												212.7	0.275451	0.118659	0.225898	0.0920896	0.115571	0.0644708	0.0590752	0.0570418	0.143903
214.8	-0.011	-4.7788	-1.7616	-2.5418	11.9285	-3.182	5.9737	5.5092	3.0215		214.8	0.29941	0.12871	0.23188	0.13118	0.08698	0.06906	0.06935	0.08312	0.1816												214.8	0.288201	0.115549	0.213668	0.13036	0.0923509	0.0680608	0.0625752	0.0449918	0.188213
216.9	0	-4.7955	-1.7417	-2.5537	11.9564	-3.1992	5.9509	5.5553	2.9906		216.9	0.31226	0.11221	0.25096	0.11944	0.11605	0.05205	0.04684	0.12807	0.14991												216.9	0.301051	0.0990495	0.232748	0.11862	0.121421	0.0510508	0.0400652	0.0899418	0.156523
219	-0.0192	-4.7155	-1.7446	-2.5632	11.8589	-3.2096	5.9509	5.5347	2.9932		219	0.29491	0.19241	0.24723	0.11011	0.01973	0.04184	0.04714	0.10631	0.15172												219	0.283701	0.179249	0.229018	0.10929	0.0251009	0.0408408	0.0403652	0.0681818	0.158333
221.1	-0.0411	-4.7022	-1.7134	-2.549	11.8624	-3.2027	5.9835	5.5153	2.97		221.1	0.27486	0.20591	0.2776	0.12447	0.02441	0.04893	0.08004	0.08576	0.12772												221.1	0.263651	0.192749	0.259388	0.12365	0.0297809	0.0479308	0.0732652	0.0476318	0.134333
223.2	-0.0589	-4.7388	-1.6779	-2.5585	11.8449	-3.213	5.99	5.4813	2.9803		223.2	0.25891	0.1695	0.31227	0.11514	0.00808	0.03882	0.08683	0.05061	0.13723												223.2	0.247701	0.156339	0.294058	0.11432	0.0134509	0.0378208	0.0800552	0.0124818	0.143843
225.3	-0.0589	-4.7955	-1.712	-2.5193	11.939	-3.1751	5.9868	5.5068	2.9597		225.3	0.26076	0.113	0.27735	0.1545	0.10336	0.07691	0.08393	0.07495	0.11584												225.3	0.249551	0.0998395	0.259138	0.15368	0.108731	0.0759108	0.0771552	0.0368218	0.122453
227.4	-0.0411	-4.7321	-1.712	-2.4658	11.8206	-3.1751	6.0258	5.5201	2.9842		227.4	0.28041	0.1766	0.27652	0.20816	-0.01387	0.0771	0.12323	0.0871	0.13955												227.4	0.269201	0.163439	0.258308	0.20734	-0.00849906	0.0761008	0.116455	0.0489718	0.146163
229.5	-0.0534	-4.6888	-1.7275	-2.5169	11.7718	-3.213	6.0356	5.548	2.9919		229.5	0.26996	0.2201	0.26019	0.15723	-0.06149	0.03939	0.13332	0.11385	0.14645												229.5	0.258751	0.206939	0.241978	0.15641	-0.0561191	0.0383908	0.126545	0.0757218	0.153063
231.6	-0.0465	-4.7555	-1.702	-2.5311	11.7822	-3.2061	6.0128	5.5007	2.9919		231.6	0.27871	0.15359	0.28486	0.14319	-0.04992	0.04648	0.11082	0.06539	0.14566												231.6	0.267501	0.140429	0.266648	0.14237	-0.0445491	0.0454808	0.104045	0.0272618	0.152273
233.7	-0.0684	-4.8155	-1.6893	-2.5311	11.7091	-3.2268	6.0128	5.4874	3.0202		233.7	0.25867	0.09379	0.29674	0.14336	-0.12184	0.02597	0.11112	0.05094	0.17317												233.7	0.247461	0.0806295	0.278528	0.14254	-0.116469	0.0249708	0.104345	0.0128118	0.179783
235.8	-0.0726	-4.7788	-1.7091	-2.5644	11.8624	-3.1578	5.9998	5.5177	3.0253		235.8	0.25632	0.13069	0.27611	0.11022	0.03263	0.09516	0.09841	0.08009	0.17748												235.8	0.245111	0.117529	0.257898	0.1094	0.0380009	0.0941608	0.0916352	0.0419618	0.184093
237.9	-0.0534	-4.7288	-1.7176	-2.5561	11.8589	-3.2199	5.9998	5.5419	3.0086		237.9	0.27737	0.18089	0.26678	0.11869	0.03031	0.03325	0.09871	0.10313	0.15999												237.9	0.266161	0.167729	0.248568	0.11787	0.0356809	0.0322508	0.0919352	0.0650018	0.166603
240	-0.0465	-4.7388	-1.7474	-2.5787	11.8867	-3.1682	6.0193	5.5541	2.9919		240	0.28612	0.17108	0.23615	0.09625	0.05929	0.08514	0.11851	0.11418	0.14249												240	0.274911	0.157919	0.217938	0.0954296	0.0646609	0.0841408	0.111735	0.0760518	0.149103
242.1	-0.0808	-4.7821	-1.7474	-2.5656	11.8624	-3.2199	6.0356	5.5456	3.0009		242.1	0.25367	0.12798	0.23533	0.10951	0.03616	0.03363	0.1351	0.10452	0.1507												242.1	0.242461	0.114819	0.217118	0.10869	0.0415309	0.0326308	0.128325	0.0663918	0.157313
244.2	-0.0684	-4.8455	-1.7332	-2.5478	11.9111	-3.244	5.9802	5.5504	2.9854		244.2	0.26792	0.06478	0.2487	0.12748	0.08604	0.00972	0.08	0.10817	0.13441												244.2	0.256711	0.0516195	0.230488	0.12666	0.0914109	0.00872083	0.0732252	0.0700418	0.141023
246.3	-0.0151	-4.9054	-1.7375	-2.5288	11.9285	-3.1372	6.0291	5.5735	2.9842		246.3	0.32307	0.00508	0.24357	0.14664	0.10461	0.11671	0.1292	0.13012	0.13242												246.3	0.311861	-0.00808051	0.225358	0.14582	0.109981	0.115711	0.122425	0.0919918	0.139033
248.4	-0.0616	-4.7588	-1.7559	-2.5597	11.9041	-3.1268	6.0063	5.5735	2.9932		248.4	0.27842	0.15187	0.22434	0.11591	0.08139	0.1273	0.1067	0.12896	0.14062												248.4	0.267211	0.138709	0.206128	0.11509	0.0867609	0.126301	0.0999252	0.0908318	0.147233
250.5	-0.0383	-4.7388	-1.7375	-2.5727	11.8972	-3.2165	6.0096	5.5662	2.9854		250.5	0.30357	0.17207	0.24192	0.10307	0.07566	0.03779	0.11029	0.12051	0.13203												250.5	0.292361	0.158909	0.223708	0.10225	0.0810309	0.0367908	0.103515	0.0823818	0.138643
252.6	-0.0452	-4.8488	-1.7176	-2.5799	11.8484	-3.213	5.9705	5.5419	2.9867		252.6	0.29852	0.06227	0.26099	0.09604	0.02804	0.04148	0.07149	0.09506	0.13254												252.6	0.287311	0.0491095	0.242778	0.0952196	0.0334109	0.0404808	0.0647152	0.0569318	0.139153
254.7	-0.0616	-4.7988	-1.7361	-2.5811	11.8867	-3.1785	6.0161	5.5274	3.0138		254.7	0.28397	0.11247	0.24166	0.095	0.06751	0.07617	0.11739	0.0794	0.15885												254.7	0.272761	0.0993095	0.223448	0.0941796	0.0728809	0.0751708	0.110615	0.0412718	0.165463
256.8	-0.037	-4.8321	-1.7403	-2.5644	11.8519	-3.2578	5.9933	5.5335	3.0331		256.8	0.31042	0.07936	0.23663	0.11186	0.03389	-0.00294	0.09488	0.08435	0.17736												256.8	0.299211	0.0661995	0.218418	0.11104	0.0392609	-0.00393917	0.0881052	0.0462218	0.183973
258.9	-0.052	-4.7555	-1.7616	-2.5692	11.8867	-3.2199	6.0649	5.5383	3.015		258.9	0.29727	0.15616	0.21451	0.10723	0.06986	0.03515	0.16678	0.088	0.15846												258.9	0.286061	0.142999	0.196298	0.10641	0.0752309	0.0341508	0.160005	0.0498718	0.165073
261	-0.0767	-4.7288	-1.7261	-2.5632	11.9285	-3.2096	6.0649	5.5201	2.9854		261	0.27442	0.18306	0.24918	0.11339	0.11284	0.04564	0.16708	0.06864	0.12807												261	0.263211	0.169899	0.230968	0.11257	0.118211	0.0446408	0.160305	0.0305118	0.134683
263.1	-0.0684	-4.7755	-1.7148	-2.5751	11.9146	-3.2923	6.0258	5.5347	2.9893		263.1	0.28457	0.13656	0.25965	0.10166	0.10012	-0.03688	0.12827	0.08209	0.13118												263.1	0.273361	0.123399	0.241438	0.10084	0.105491	-0.0378792	0.121495	0.0439618	0.137793
265.2	-0.0287	-4.8488	-1.7148	-2.549	11.939	-3.2647	5.977	5.5541	3.0434		265.2	0.32612	0.06345	0.25882	0.12792	0.12569	-0.00909	0.07977	0.10034	0.18449												265.2	0.314911	0.0502895	0.240608	0.1271	0.131061	-0.0100892	0.0729952	0.0622118	0.191103
267.3	-0.026	-4.8188	-1.7601	-2.5442	11.838	-3.1785	5.9737	5.5723	2.9957		267.3	0.33067	0.09365	0.2127	0.13289	0.02587	0.0773	0.07677	0.11738	0.13599												267.3	0.319461	0.0804895	0.194488	0.13207	0.0312409	0.0763008	0.0699952	0.0792518	0.142603
269.4	-0.0465	-4.7688	-1.7318	-2.5585	11.9076	-3.2371	5.9281	5.5468	3.0073		269.4	0.31202	0.14385	0.24017	0.11875	0.09664	0.01889	0.03146	0.09073	0.1468												269.4	0.300811	0.130689	0.221958	0.11793	0.102011	0.0178908	0.0246852	0.0526018	0.153413
271.5	-0.0534	-4.7655	-1.6935	-2.5906	11.8658	-3.2199	5.9542	5.5626	3.0138		271.5	0.30697	0.14735	0.27764	0.08682	0.05602	0.03628	0.05786	0.10538	0.15251												271.5	0.295761	0.134189	0.259428	0.0859996	0.0613909	0.0352808	0.0510852	0.0672518	0.159123
273.6	-0.0602	-4.8688	-1.6751	-2.5513	11.9181	-3.1923	5.889	5.5589	3.0009		273.6	0.30202	0.04424	0.29521	0.12628	0.10949	0.06407	-0.00704	0.10052	0.13882												273.6	0.290811	0.0310795	0.276998	0.12546	0.114861	0.0630708	-0.0138148	0.0623918	0.145433
275.7	-0.1027	-4.8821	-1.7162	-2.5775	11.8693	-3.2233	5.9737	5.5808	2.9957		275.7	0.26137	0.03114	0.25329	0.10024	0.06187	0.03326	0.07795	0.12127	0.13283												275.7	0.250161	0.0179795	0.235078	0.0994196	0.0672409	0.0322608	0.0711752	0.0831418	0.139443
277.8	-0.0808	-4.8288	-1.7375	-2.5609	11.8972	-3.2268	5.977	5.5844	2.9906		277.8	0.28512	0.08464	0.23116	0.11701	0.09094	0.02995	0.08155	0.12372	0.12693												277.8	0.273911	0.0714795	0.212948	0.11619	0.0963109	0.0289508	0.0747752	0.0855918	0.133543
279.9	-0.1013	-4.8455	-1.6935	-2.5644	11.8519	-3.2371	6.0193	5.5892	3.0215		279.9	0.26647	0.06814	0.27433	0.11367	0.04682	0.01984	0.12415	0.12736	0.15704												279.9	0.255261	0.0549795	0.256118	0.11285	0.0521909	0.0188408	0.117375	0.0892318	0.163653
282	-0.1109	-4.8521	-1.668	-2.5704	11.838	-3.1096	6.003	5.5541	3.0099		282	0.25872	0.06173	0.299	0.10784	0.0341	0.14753	0.10814	0.09111	0.14465												282	0.247511	0.0485695	0.280788	0.10702	0.0394709	0.146531	0.101365	0.0529818	0.151263
284.1	-0.1342	-4.9121	-1.6638	-2.5323	11.8484	-3.1509	5.9021	5.5892	3.0176		284.1	0.23727	0.00193	0.30237	0.1461	0.04567	0.10642	0.00754	0.12505	0.15156												284.1	0.226061	-0.0112305	0.284158	0.14528	0.0510409	0.105421	0.000765224	0.0869218	0.158173
286.2	-0.0958	-4.8754	-1.6624	-2.5228	11.8624	-3.1854	5.9477	5.6147	3.0228		286.2	0.27752	0.03883	0.30295	0.15577	0.06085	0.07211	0.05344	0.1494	0.15596												286.2	0.266311	0.0256695	0.284738	0.15495	0.0662209	0.0711108	0.0466652	0.111272	0.162573
288.3	-0.0917	-4.9388	-1.6694	-2.5407	11.9076	-3.1854	5.8988	5.6208	3.0086		288.3	0.28347	-0.02437	0.29512	0.13803	0.10722	0.0723	0.00483	0.15435	0.14097												288.3	0.272261	-0.0375305	0.276908	0.13721	0.112591	0.0713008	-0.00194478	0.116222	0.147583
290.4	-0.0945	-4.9188	-1.6666	-2.5573	11.8763	-3.2888	5.9672	5.5771	3.0099		290.4	0.28252	-0.00418	0.29709	0.12159	0.0771	-0.03091	0.07353	0.10949	0.14148												290.4	0.271311	-0.0173405	0.278878	0.12077	0.0824709	-0.0319092	0.0667552	0.0713618	0.148093
292.5	-0.1191	-4.8754	-1.6454	-2.5715	11.9216	-3.2509	5.9477	5.5577	3.0176		292.5	0.25977	0.03942	0.31746	0.10756	0.12357	0.00718	0.05433	0.08894	0.14839												292.5	0.248561	0.0262595	0.299248	0.10674	0.128941	0.00618083	0.0475552	0.0508118	0.155003
294.6	-0.1027	-4.9521	-1.6822	-2.5395	11.9216	-3.282	5.8858	5.5419	3.0086		294.6	0.27802	-0.03708	0.27984	0.13972	0.12475	-0.02373	-0.00728	0.07199	0.1386												294.6	0.266811	-0.0502405	0.261628	0.1389	0.130121	-0.0247292	-0.0140548	0.0338618	0.145213
296.7	-0.1109	-4.9254	-1.7205	-2.5454	11.9285	-3.2406	5.9737	5.5456	3.0343		296.7	0.27167	-0.01018	0.24071	0.13399	0.13282	0.01786	0.08092	0.07453	0.1635												296.7	0.260461	-0.0233405	0.222498	0.13317	0.138191	0.0168608	0.0741452	0.0364018	0.170113
298.8	-0.115	-4.8255	-1.7573	-2.5311	11.925	-3.2682	5.964	5.5723	3.0099		298.8	0.26943	0.08991	0.20308	0.14845	0.1305	-0.00955	0.07152	0.10008	0.13831												298.8	0.258221	0.0767495	0.184868	0.14763	0.135871	-0.0105492	0.0647452	0.0619518	0.144923
300.9	-0.1369	-4.8321	-1.7389	-2.5692	11.9842	-3.3371	6.0258	5.5698	3.0125		300.9	0.24938	0.08351	0.22065	0.11052	0.19088	-0.07826	0.13361	0.09643	0.14012												300.9	0.238171	0.0703495	0.202438	0.1097	0.196251	-0.0792592	0.126835	0.0583018	0.146733
303	-0.1478	-4.9121	-1.7049	-2.5311	12.0051	-3.2337	6.0519	5.5795	3.0189		303	0.24033	0.00371	0.25383	0.14878	0.21295	0.02533	0.16001	0.10497	0.14573												303	0.229121	-0.00945051	0.235618	0.14796	0.218321	0.0243308	0.153235	0.0668418	0.152343
305.1	-0.1561	-4.9388	-1.6964	-2.53	11.9459	-3.282	5.9933	5.5565	3.0176		305.1	0.23388	-0.02279	0.2615	0.15004	0.15493	-0.02278	0.10171	0.08082	0.14363												305.1	0.222671	-0.0359505	0.243288	0.14922	0.160301	-0.0237792	0.0949352	0.0426918	0.150243
307.2	-0.1054	-4.8854	-1.6865	-2.4967	11.8031	-3.2854	5.9607	5.5892	3.0331		307.2	0.28643	0.0308	0.27057	0.18351	0.0133	-0.02599	0.0694	0.11237	0.15834												307.2	0.275221	0.0176395	0.252358	0.18269	0.0186709	-0.0269892	0.0626252	0.0742418	0.164953
309.3	-0.1273	-4.8921	-1.7063	-2.5288	11.8066	-3.3819	5.9737	5.5747	2.9867		309.3	0.26638	0.0243	0.24994	0.15157	0.01798	-0.1223	0.0827	0.09671	0.11115												309.3	0.255171	0.0111395	0.231728	0.15075	0.0233509	-0.123299	0.0759252	0.0585818	0.117763
311.4	-0.1561	-4.8788	-1.6666	-2.5525	11.9007	-3.3543	5.9183	5.5832	3.0202		311.4	0.23943	0.0378	0.28882	0.12804	0.11325	-0.09451	0.0276	0.10406	0.14386												311.4	0.228221	0.0246395	0.270608	0.12722	0.118621	-0.0955092	0.0208252	0.0659318	0.150473
313.5	-0.1643	-4.8854	-1.6609	-2.5133	11.8937	-3.4371	5.9086	5.5674	3.0125		313.5	0.23308	0.0314	0.29369	0.1674	0.10743	-0.17713	0.01819	0.08711	0.13537												313.5	0.221871	0.0182395	0.275478	0.16658	0.112801	-0.178129	0.0114152	0.0489818	0.141983
315.6	-0.1328	-4.9188	-1.6765	-2.4694	11.8728	-3.4612	5.9151	5.5917	3.0446		315.6	0.26643	-0.00181	0.27726	0.21147	0.0877	-0.20104	0.02499	0.11025	0.16667												315.6	0.255221	-0.0149705	0.259048	0.21065	0.0930709	-0.202039	0.0182152	0.0721218	0.173283
317.7	-0.1177	-4.8721	-1.6907	-2.5074	11.831	-3.3785	5.8955	5.5868	3.0266		317.7	0.28338	0.04509	0.26223	0.17363	0.04708	-0.11815	0.00569	0.1042	0.14788												317.7	0.272171	0.0319295	0.244018	0.17281	0.0524509	-0.119149	-0.00108478	0.0660718	0.154493
319.8	-0.1424	-4.8321	-1.6808	-2.5216	11.8275	-3.2406	5.9412	5.5929	3.0189		319.8	0.26053	0.08529	0.27131	0.15959	0.04476	0.01994	0.05168	0.10915	0.13939												319.8	0.249321	0.0721295	0.253098	0.15877	0.0501309	0.0189408	0.0449052	0.0710218	0.146003
321.9	-0.1506	-4.9154	-1.6496	-2.5466	11.8624	-3.2992	6.003	5.5953	3.0536		321.9	0.25418	0.00219	0.30168	0.13476	0.08083	-0.03847	0.11378	0.11039	0.1733												321.9	0.242971	-0.0109705	0.283468	0.13394	0.0862009	-0.0394692	0.107005	0.0722618	0.179913
324	-0.1424	-4.9521	-1.6567	-2.5121	11.8867	-3.2854	5.9672	5.565	3.0536		324	0.26423	-0.03432	0.29375	0.16942	0.10631	-0.02448	0.07828	0.07894	0.1725												324	0.253021	-0.0474805	0.275538	0.1686	0.111681	-0.0254792	0.0715052	0.0408118	0.179113
326.1	-0.1191	-4.9654	-1.6808	-2.5074	11.8449	-3.3095	5.9249	5.5759	3.0395		326.1	0.28938	-0.04742	0.26882	0.17429	0.06568	-0.04839	0.03627	0.08868	0.15761												326.1	0.278171	-0.0605805	0.250608	0.17347	0.0710509	-0.0493892	0.0294952	0.0505518	0.164223
328.2	-0.1328	-4.8888	-1.7035	-2.5074	11.8763	-3.3337	5.9868	5.5844	3.0524		328.2	0.27753	0.02938	0.2453	0.17445	0.09826	-0.0724	0.09847	0.09603	0.16972												328.2	0.266321	0.0162195	0.227088	0.17363	0.103631	-0.0733992	0.0916952	0.0579018	0.176333
330.3	-0.1766	-4.8588	-1.712	-2.5525	11.9111	-3.3509	5.99	5.5577	3.0987		330.3	0.23558	0.05958	0.23597	0.12952	0.13423	-0.08941	0.10197	0.06818	0.21523												330.3	0.224371	0.0464195	0.217758	0.1287	0.139601	-0.0904092	0.0951952	0.0300518	0.221843
332.4	-0.1643	-4.8555	-1.6779	-2.5442	11.8589	-3.4267	5.9477	5.582	3.0665		332.4	0.24973	0.06307	0.26924	0.13798	0.08321	-0.16502	0.05996	0.09132	0.18224												332.4	0.238521	0.0499095	0.251028	0.13716	0.0885809	-0.166019	0.0531852	0.0531918	0.188853
334.5	-0.1848	-4.9088	-1.6921	-2.5466	11.8589	-3.3302	5.9835	5.5577	3.0524		334.5	0.23108	0.00997	0.25421	0.13574	0.08438	-0.06833	0.09606	0.06587	0.16734												334.5	0.219871	-0.00319051	0.235998	0.13492	0.0897509	-0.0693292	0.0892852	0.0277418	0.173953
336.6	-0.1506	-4.8188	-1.702	-2.543	11.8136	-3.3026	6.0942	5.6074	3.0369		336.6	0.26713	0.10017	0.24349	0.13951	0.04026	-0.04054	0.20706	0.11442	0.15105												336.6	0.255921	0.0870095	0.225278	0.13869	0.0456309	-0.0415392	0.200285	0.0762918	0.157663
338.7	-0.1574	-4.8221	-1.6765	-2.5632	11.7892	-3.2751	5.9835	5.6099	3.015		338.7	0.26218	0.09707	0.26816	0.11947	0.01703	-0.01285	0.09665	0.11576	0.12836												338.7	0.250971	0.0839095	0.249948	0.11865	0.0224009	-0.0138492	0.0898752	0.0776318	0.134973
340.8	-0.1656	-4.8654	-1.6624	-2.5549	11.8763	-3.3543	5.9933	5.6038	3.0421		340.8	0.25583	0.05396	0.28143	0.12794	0.10531	-0.09186	0.10675	0.10851	0.15467												340.8	0.244621	0.0407995	0.263218	0.12712	0.110681	-0.0928592	0.0999752	0.0703818	0.161283
342.9	-0.1437	-4.9454	-1.6794	-2.5525	11.9181	-3.3957	5.9086	5.5517	3.0536		342.9	0.27958	-0.02584	0.2636	0.1305	0.14829	-0.13307	0.02235	0.05526	0.16537												342.9	0.268371	-0.0390005	0.245388	0.12968	0.153661	-0.134069	0.0155752	0.0171318	0.171983
345	-0.1533	-4.9588	-1.6808	-2.5347	11.8066	-3.3543	5.9281	5.5832	3.0395		345	0.27183	-0.03904	0.26138	0.14847	0.03796	-0.09148	0.04214	0.0856	0.15048												345	0.260621	-0.0522005	0.243168	0.14765	0.0433309	-0.0924792	0.0353652	0.0474718	0.157093
347.1	-0.1068	-4.8754	-1.6935	-2.5656	11.831	-3.3337	5.9965	5.5989	3.0369		347.1	0.32018	0.04456	0.24785	0.11773	0.06354	-0.07069	0.11084	0.10015	0.14709												347.1	0.308971	0.0313995	0.229638	0.11691	0.0689109	-0.0716892	0.104065	0.0620218	0.153703
349.2	-0.1328	-4.7688	-1.6737	-2.5632	11.8415	-3.3164	5.9835	5.5917	3.0575		349.2	0.29603	0.15135	0.26682	0.12029	0.07521	-0.0532	0.09814	0.0918	0.1669												349.2	0.284821	0.138189	0.248608	0.11947	0.0805809	-0.0541992	0.0913652	0.0536718	0.173513
351.3	-0.1287	-4.8521	-1.651	-2.5727	11.9007	-3.3026	5.964	5.5989	3.0524		351.3	0.30198	0.06825	0.28869	0.11096	0.13559	-0.03921	0.07894	0.09784	0.16101												351.3	0.290771	0.0550895	0.270478	0.11014	0.140961	-0.0402092	0.0721652	0.0597118	0.167623
353.4	-0.1451	-4.8088	-1.6709	-2.5609	11.8972	-3.3233	5.9933	5.5771	3.0536		353.4	0.28743	0.11175	0.26797	0.12292	0.13326	-0.05972	0.10853	0.07489	0.16141												353.4	0.276221	0.0985895	0.249758	0.1221	0.138631	-0.0607192	0.101755	0.0367618	0.168023
355.5	-0.1465	-4.7855	-1.6624	-2.5311	11.9982	-3.4267	6.0193	5.5626	3.0215		355.5	0.28788	0.13525	0.27564	0.15289	0.23544	-0.16293	0.13483	0.05924	0.12852												355.5	0.276671	0.122089	0.257428	0.15207	0.240811	-0.163929	0.128055	0.0211118	0.135133
357.6	-0.1259	-4.8288	-1.6524	-2.5454	11.9529	-3.3095	5.9835	5.5783	3.0266		357.6	0.31033	0.09214	0.28481	0.13875	0.19131	-0.04554	0.09933	0.07378	0.13283												357.6	0.299121	0.0789795	0.266598	0.13793	0.196681	-0.0465392	0.0925552	0.0356518	0.139443
359.7	-0.1629	-4.8155	-1.6822	-2.5704	11.9564	-3.3337	5.9933	5.6038	3.0549		359.7	0.27518	0.10564	0.25418	0.11392	0.19599	-0.06955	0.10942	0.09813	0.16034												359.7	0.263971	0.0924795	0.235968	0.1131	0.201361	-0.0705492	0.102645	0.0600018	0.166953
361.8	-0.193	-4.7788	-1.6751	-2.5727	11.9773	-3.344	5.9965	5.5844	3.0446		361.8	0.24694	0.14254	0.26046	0.11178	0.21807	-0.07966	0.11292	0.07758	0.14924												361.8	0.235731	0.129379	0.242248	0.11096	0.223441	-0.0806592	0.106145	0.0394518	0.155853
363.9	-0.1629	-4.8521	-1.6638	-2.5525	11.925	-3.3061	5.9607	5.5735	3.0639		363.9	0.27889	0.06944	0.27093	0.13214	0.16694	-0.04158	0.07742	0.06552	0.16775												363.9	0.267681	0.0562795	0.252718	0.13132	0.172311	-0.0425792	0.0706452	0.0273918	0.174363
366	-0.1807	-4.9088	-1.7006	-2.5573	11.9111	-3.2475	5.9868	5.5783	3.0241		366	0.26294	0.01293	0.2333	0.12751	0.15422	0.01721	0.10381	0.06917	0.12716												366	0.251731	-0.000230512	0.215088	0.12669	0.159591	0.0162108	0.0970352	0.0310418	0.133773
368.1	-0.167	-4.8121	-1.6893	-2.53	11.8728	-3.2371	6.0356	5.5844	3.0536		368.1	0.27849	0.10983	0.24377	0.15497	0.11709	0.0278	0.15291	0.07411	0.15587												368.1	0.267281	0.0966695	0.225558	0.15415	0.122461	0.0268008	0.146135	0.0359818	0.162483
370.2	-0.1807	-4.7821	-1.668	-2.5609	11.8415	-3.282	6.003	5.5929	3.0279		370.2	0.26664	0.14003	0.26425	0.12424	0.08697	-0.01691	0.12061	0.08146	0.12938												370.2	0.255431	0.126869	0.246038	0.12342	0.0923409	-0.0179092	0.113835	0.0433318	0.135993
372.3	-0.193	-4.8654	-1.6439	-2.5787	11.8728	-3.2406	6.0812	5.6002	3.0356		372.3	0.25619	0.05693	0.28752	0.1066	0.11944	0.02468	0.1991	0.08761	0.13628												372.3	0.244981	0.0437695	0.269308	0.10578	0.124811	0.0236808	0.192325	0.0494818	0.142893
374.4	-0.1944	-4.9088	-1.6425	-2.5454	11.8728	-3.2751	5.9542	5.5953	3.0421		374.4	0.25664	0.01372	0.28809	0.14007	0.12062	-0.00963	0.0724	0.08155	0.14199												374.4	0.245431	0.000559488	0.269878	0.13925	0.125991	-0.0106292	0.0656252	0.0434218	0.148603
376.5	-0.1793	-4.9221	-1.6666	-2.5502	11.8519	-3.2923	5.9477	5.6038	3.0356		376.5	0.27359	0.000621465	0.26316	0.13543	0.10089	-0.02664	0.0662	0.0889	0.1347												376.5	0.262381	-0.012539	0.244948	0.13461	0.106261	-0.0276392	0.0594252	0.0507718	0.141313
378.6	-0.1807	-4.8221	-1.6737	-2.5609	11.8798	-3.2751	5.9314	5.6074	3.0331		378.6	0.27404	0.10082	0.25524	0.1249	0.12997	-0.00925	0.05019	0.09135	0.13141												378.6	0.262831	0.0876595	0.237028	0.12408	0.135341	-0.0102492	0.0434152	0.0532218	0.138023
380.7	-0.2067	-4.8621	-1.6652	-2.5941	11.8763	-3.2268	5.9183	5.6086	3.0434		380.7	0.24989	0.06102	0.26291	0.09186	0.12765	0.03924	0.03739	0.09139	0.14092												380.7	0.238681	0.0478595	0.244698	0.0910396	0.133021	0.0382408	0.0306152	0.0532618	0.147533
382.8	-0.1985	-4.8255	-1.6666	-2.6155	11.9355	-3.2199	5.9542	5.6014	3.0588		382.8	0.25994	0.09781	0.26068	0.07062	0.18802	0.04633	0.07359	0.08304	0.15552												382.8	0.248731	0.0846495	0.242468	0.0697996	0.193391	0.0453308	0.0668152	0.0449118	0.162133
384.9	-0.2053	-4.9221	-1.6723	-2.5894	11.9111	-3.2613	5.863	5.6074	3.0588		384.9	0.25499	0.00141	0.25415	0.09689	0.1648	0.00512	-0.01732	0.08789	0.15473												384.9	0.243781	-0.0117505	0.235938	0.0960696	0.170171	0.00412083	-0.0240948	0.0497618	0.161343
387	-0.1875	-4.8888	-1.6737	-2.562	11.8798	-3.1751	5.8727	5.6026	3.0202		387	0.27464	0.03491	0.25193	0.12445	0.13467	0.09151	-0.00732	0.08193	0.11534												387	0.263431	0.0217495	0.233718	0.12363	0.140041	0.0905108	-0.0140948	0.0438018	0.121953
389.1	-0.2149	-4.8388	-1.702	-2.5359	11.824	-3.2233	5.889	5.6438	3.0202		389.1	0.24909	0.08511	0.2228	0.15072	0.08005	0.0435	0.00928	0.12198	0.11455												389.1	0.237881	0.0719495	0.204588	0.1499	0.0854209	0.0425008	0.00250522	0.0838518	0.121163
391.2	-0.2149	-4.8121	-1.6907	-2.5727	11.8206	-3.2682	5.8955	5.6123	3.0292		391.2	0.25094	0.112	0.23327	0.11408	0.07782	-0.00121	0.01607	0.08933	0.12275												391.2	0.239731	0.0988395	0.215058	0.11326	0.0831909	-0.00220917	0.00929522	0.0512018	0.129363
393.3	-0.2519	-4.8321	-1.6879	-2.5418	11.8867	-3.2923	5.889	5.5977	3.0331		393.3	0.21579	0.0922	0.23524	0.14515	0.1451	-0.02512	0.00987	0.07357	0.12586												393.3	0.204581	0.0790395	0.217028	0.14433	0.150471	-0.0261192	0.00309522	0.0354418	0.132473
395.4	-0.2108	-4.8754	-1.685	-2.5335	11.8066	-3.2475	5.876	5.6086	3.0163		395.4	0.25874	0.0491	0.23732	0.15361	0.06617	0.01987	-0.00283	0.08332	0.10827												395.4	0.247531	0.0359395	0.219108	0.15279	0.0715409	0.0188708	-0.00960478	0.0451918	0.114883
397.5	-0.2149	-4.7655	-1.7247	-2.5573	11.7962	-3.1544	5.8532	5.6171	3.0253		397.5	0.25649	0.1592	0.19679	0.12997	0.05695	0.11316	-0.02534	0.09067	0.11648												397.5	0.245281	0.146039	0.178578	0.12915	0.0623209	0.112161	-0.0321148	0.0525418	0.123093
399.6	-0.2094	-4.8255	-1.6765	-2.5656	11.7927	-3.1958	5.8955	5.622	3.0691		399.6	0.26384	0.09939	0.24416	0.12184	0.05463	0.07195	0.01726	0.09441	0.15949												399.6	0.252631	0.0862295	0.225948	0.12102	0.0600009	0.0709508	0.0104852	0.0562818	0.166103
401.7	-0.2423	-4.8188	-1.6624	-2.5834	11.831	-3.1751	5.8695	5.5965	3.0549		401.7	0.23279	0.10629	0.25743	0.1042	0.0941	0.09284	-0.00844	0.06776	0.14449												401.7	0.221581	0.0931295	0.239218	0.10338	0.0994709	0.0918408	-0.0152148	0.0296318	0.151103
403.8	-0.2382	-4.8288	-1.6411	-2.5644	11.8066	-3.2302	5.8206	5.6099	3.0575		403.8	0.23874	0.09649	0.27791	0.12337	0.07088	0.03793	-0.05705	0.08001	0.1463												403.8	0.227531	0.0833295	0.259698	0.12255	0.0762509	0.0369308	-0.0638248	0.0418818	0.152913
405.9	-0.245	-4.8421	-1.6737	-2.5252	11.7509	-3.2716	5.9216	5.6462	3.0871		405.9	0.23379	0.08339	0.24448	0.16273	0.01635	-0.00328	0.04425	0.11515	0.17511												405.9	0.222581	0.0702295	0.226268	0.16191	0.0217209	-0.00427917	0.0374752	0.0770218	0.181723
408	-0.2396	-4.7955	-1.6779	-2.5454	11.8415	-3.2027	5.863	5.6681	3.0536		408	0.24104	0.13018	0.23945	0.1427	0.10813	0.06581	-0.01405	0.1359	0.14082												408	0.229831	0.117019	0.221238	0.14188	0.113501	0.0648108	-0.0208248	0.0977718	0.147433
410.1	-0.2368	-4.7855	-1.6765	-2.5525	11.9355	-3.2751	5.8467	5.6596	3.0614		410.1	0.24569	0.14038	0.24002	0.13576	0.2033	-0.0064	-0.03006	0.12624	0.14782												410.1	0.234481	0.127219	0.221808	0.13494	0.208671	-0.00739917	-0.0368348	0.0881118	0.154433
412.2	-0.219	-4.6888	-1.668	-2.5846	11.9912	-3.2647	5.8727	5.6535	3.0601		412.2	0.26534	0.23728	0.2477	0.10382	0.26018	0.00419	-0.00376	0.11899	0.14573												412.2	0.254131	0.224119	0.229488	0.103	0.265551	0.00319083	-0.0105348	0.0808618	0.152343
414.3	-0.2546	-4.7022	-1.6425	-2.5977	11.939	-3.2647	5.8076	5.639	3.0691		414.3	0.23159	0.22408	0.27237	0.09089	0.20915	0.00437	-0.06856	0.10334	0.15394												414.3	0.220381	0.210919	0.254158	0.0900696	0.214521	0.00337083	-0.0753348	0.0652118	0.160553
416.4	-0.2177	-4.8088	-1.6779	-2.5585	11.8867	-3.1854	5.8695	5.6596	3.0652		416.4	0.27034	0.11767	0.23614	0.13025	0.15803	0.08386	-0.00637	0.12278	0.14925												416.4	0.259131	0.104509	0.217928	0.12943	0.163401	0.0828608	-0.0131448	0.0846518	0.155863
418.5	-0.2286	-4.7188	-1.7573	-2.5609	11.9285	-3.2233	5.9086	5.6838	3.0781		418.5	0.26129	0.20787	0.15591	0.12802	0.201	0.04615	0.03303	0.14583	0.16136												418.5	0.250081	0.194709	0.137698	0.1272	0.206371	0.0451508	0.0262552	0.107702	0.167973
420.6	-0.2259	-4.7388	-1.7332	-2.5822	11.939	-3.2716	5.9281	5.685	3.0588		420.6	0.26584	0.18807	0.17919	0.10688	0.21268	-0.00196	0.05283	0.14588	0.14126												420.6	0.254631	0.174909	0.160978	0.10606	0.218051	-0.00295917	0.0460552	0.107752	0.147873
422.7	-0.2491	-4.7655	-1.7205	-2.5977	11.8519	-3.2371	5.9249	5.6438	3.0781		422.7	0.24449	0.16157	0.19106	0.09155	0.12676	0.03273	0.04992	0.10352	0.15977												422.7	0.233281	0.148409	0.172848	0.0907296	0.132131	0.0317308	0.0431452	0.0653918	0.166383
424.8	-0.2012	-4.7821	-1.6921	-2.5799	11.9076	-3.2475	5.9314	5.6026	3.082		424.8	0.29425	0.14516	0.21863	0.10951	0.18363	0.02252	0.05672	0.06117	0.16288												424.8	0.283041	0.131999	0.200418	0.10869	0.189001	0.0215208	0.0499452	0.0230418	0.169493
426.9	-0.2313	-4.8255	-1.7148	-2.5668	11.7788	-3.2475	5.9151	5.6268	3.0781		426.9	0.266	0.10196	0.1951	0.12277	0.05601	0.02271	0.04072	0.08422	0.15819												426.9	0.254791	0.0887995	0.176888	0.12195	0.0613809	0.0217108	0.0339452	0.0460918	0.164803
429	-0.2396	-4.7155	-1.702	-2.5585	11.7857	-3.2923	5.8923	5.6147	3.0678		429	0.25955	0.21216	0.20708	0.13124	0.06408	-0.0219	0.01821	0.07096	0.14709												429	0.248341	0.198999	0.188868	0.13042	0.0694509	-0.0228992	0.0114352	0.0328318	0.153703
431.1	-0.2354	-4.6988	-1.6269	-2.5656	11.7927	-3.1923	5.9379	5.628	3.0665		431.1	0.2656	0.22906	0.28135	0.1243	0.07226	0.07829	0.06411	0.08311	0.145												431.1	0.254391	0.215899	0.263138	0.12348	0.0776309	0.0772908	0.0573352	0.0449818	0.151613
433.2	-0.2546	-4.7621	-1.6539	-2.5715	11.8171	-3.2371	5.8727	5.6062	3.0794		433.2	0.24825	0.16595	0.25352	0.11857	0.09783	0.03368	-0.00079223	0.06016	0.15711												433.2	0.237041	0.152789	0.235308	0.11775	0.103201	0.0326808	-0.00756701	0.0220318	0.163723
435.3	-0.2437	-4.8088	-1.6496	-2.5632	11.8624	-3.2785	5.8695	5.645	3.1025		435.3	0.261	0.11945	0.25699	0.12703	0.14431	-0.00753	-0.0037	0.0978	0.17942												435.3	0.249791	0.106289	0.238778	0.12621	0.149681	-0.00852917	-0.0104748	0.0596718	0.186033
437.4	-0.245	-4.8621	-1.668	-2.5727	11.8136	-3.2406	5.8304	5.6462	3.0794		437.4	0.26155	0.06635	0.23777	0.1177	0.09668	0.03056	-0.0425	0.09785	0.15553												437.4	0.250341	0.0531895	0.219558	0.11688	0.102051	0.0295608	-0.0492748	0.0597218	0.162143
439.5	-0.2382	-4.8121	-1.6482	-2.5442	11.8345	-3.2957	5.9412	5.6838	3.1128		439.5	0.2702	0.11655	0.25674	0.14636	0.11876	-0.02435	0.0686	0.1343	0.18813												439.5	0.258991	0.103389	0.238528	0.14554	0.124131	-0.0253492	0.0618252	0.0961718	0.194743
441.6	-0.2615	-4.8754	-1.6765	-2.5537	11.7997	-3.2751	5.8858	5.6523	3.0781		441.6	0.24875	0.05344	0.22761	0.13702	0.08514	-0.00356	0.01349	0.10164	0.15264												441.6	0.237541	0.0402795	0.209398	0.1362	0.0905109	-0.00455917	0.00671522	0.0635118	0.159253
443.7	-0.2861	-4.7455	-1.6751	-2.5359	11.8554	-3.2682	5.8402	5.6462	3.0845		443.7	0.226	0.18354	0.22818	0.15499	0.14201	0.00353	-0.03181	0.09439	0.15825												443.7	0.214791	0.170379	0.209968	0.15417	0.147381	0.00253083	-0.0385848	0.0562618	0.164863
445.8	-0.2437	-4.7588	-1.6978	-2.5383	11.8066	-3.213	5.9249	5.6523	3.0794		445.8	0.27025	0.17044	0.20466	0.15275	0.09439	0.05892	0.05319	0.09934	0.15236												445.8	0.259041	0.157279	0.186448	0.15193	0.0997609	0.0579208	0.0464152	0.0612118	0.158973
447.9	-0.2163	-4.6922	-1.7275	-2.5121	11.7788	-3.1923	5.9346	5.7081	3.1038		447.9	0.2995	0.23724	0.17413	0.17912	0.06776	0.07981	0.06318	0.15398	0.17596												447.9	0.288291	0.224079	0.155918	0.1783	0.0731309	0.0788108	0.0564052	0.115852	0.182573
450	-0.2396	-4.6622	-1.6808	-2.5311	11.7997	-3.2888	5.9249	5.6935	3.1231		450	0.27805	0.26743	0.22	0.16028	0.08984	-0.0165	0.05378	0.13823	0.19447												450	0.266841	0.254269	0.201788	0.15946	0.0952109	-0.0174992	0.0470052	0.100102	0.201083
452.1	-0.2026	-4.6922	-1.6142	-2.53	11.8275	-3.3337	5.8923	5.6632	3.1064		452.1	0.3169	0.23763	0.28577	0.16155	0.11881	-0.06121	0.02148	0.10677	0.17698												452.1	0.305691	0.224469	0.267558	0.16073	0.124181	-0.0622092	0.0147052	0.0686418	0.183593
454.2	-0.2135	-4.7588	-1.6354	-2.5513	11.7788	-3.2923	5.8923	5.6681	3.1244		454.2	0.30785	0.17123	0.26375	0.14041	0.07129	-0.01962	0.02178	0.11052	0.19419												454.2	0.296641	0.158069	0.245538	0.13959	0.0766609	-0.0206192	0.0150052	0.0723918	0.200803
456.3	-0.2081	-4.7821	-1.6624	-2.5002	11.7683	-3.2302	5.863	5.6438	3.091		456.3	0.3151	0.14813	0.23592	0.19167	0.06196	0.04267	-0.00723	0.08507	0.16												456.3	0.303891	0.134969	0.217708	0.19085	0.0673309	0.0416708	-0.0140048	0.0469418	0.166613
458.4	-0.2368	-4.7821	-1.6822	-2.4943	11.7335	-3.1923	5.9509	5.6705	3.0897		458.4	0.28825	0.14832	0.21529	0.19774	0.02834	0.08076	0.08097	0.11061	0.1579												458.4	0.277041	0.135159	0.197078	0.19692	0.0337109	0.0797608	0.0741952	0.0724818	0.164513
460.5	-0.2546	-4.8088	-1.7077	-2.5442	11.7265	-3.2199	5.9542	5.6523	3.0987		460.5	0.2723	0.12182	0.18896	0.148	0.02252	0.05335	0.08457	0.09126	0.16611												460.5	0.261091	0.108659	0.170748	0.14718	0.0278909	0.0523508	0.0777952	0.0531318	0.172723
462.6	-0.2587	-4.7888	-1.695	-2.5347	11.8136	-3.244	5.9086	5.6317	3.073		462.6	0.27005	0.14202	0.20084	0.15767	0.11079	0.02944	0.03926	0.06951	0.13962												462.6	0.258841	0.128859	0.182628	0.15685	0.116161	0.0284408	0.0324852	0.0313818	0.146233
464.7	-0.2532	-4.7488	-1.6893	-2.543	11.824	-3.2785	5.8337	5.6572	3.1334		464.7	0.2774	0.18222	0.20571	0.14953	0.12237	-0.00488	-0.03534	0.09385	0.19923												464.7	0.266191	0.169059	0.187498	0.14871	0.127741	-0.00587917	-0.0421148	0.0557218	0.205843
466.8	-0.2615	-4.7688	-1.695	-2.5288	11.737	-3.2371	5.8988	5.6353	3.1077		466.8	0.27095	0.16241	0.19918	0.1639	0.03654	0.03671	0.03006	0.0708	0.17273												466.8	0.259741	0.149249	0.180968	0.16308	0.0419109	0.0357108	0.0232852	0.0326718	0.179343
468.9	-0.2669	-4.7755	-1.7134	-2.5407	11.7196	-3.2509	5.9314	5.6802	3.0961		468.9	0.2674	0.15591	0.17995	0.15216	0.02032	0.0231	0.06295	0.11455	0.16034												468.9	0.256191	0.142749	0.161738	0.15134	0.0256909	0.0221008	0.0561752	0.0764218	0.166953
471	-0.2888	-4.7621	-1.712	-2.5383	11.7718	-3.2854	5.8955	5.6693	3.0845		471	0.24735	0.16951	0.18053	0.15472	0.07369	-0.01121	0.02735	0.10249	0.14795												471	0.236141	0.156349	0.162318	0.1539	0.0790609	-0.0122092	0.0205752	0.0643618	0.154563
473.1	-0.2984	-4.6755	-1.6964	-2.5347	11.8136	-3.2233	5.8597	5.6353	3.1128		473.1	0.2396	0.25631	0.1953	0.15849	0.11667	0.05108	-0.00815	0.06734	0.17546												473.1	0.228391	0.243149	0.177088	0.15767	0.122041	0.0500808	-0.0149248	0.0292118	0.182073
475.2	-0.2806	-4.7355	-1.6779	-2.505	11.7997	-3.2337	5.8923	5.6353	3.109		475.2	0.25925	0.1965	0.21297	0.18835	0.10394	0.04087	0.02474	0.06619	0.17087												475.2	0.248041	0.183339	0.194758	0.18753	0.109311	0.0398708	0.0179652	0.0280618	0.177483
477.3	-0.2491	-4.7688	-1.7332	-2.5157	11.7788	-3.1854	5.9346	5.6353	3.1244		477.3	0.2926	0.1634	0.15684	0.17782	0.08422	0.08936	0.06734	0.06503	0.18547												477.3	0.281391	0.150239	0.138628	0.177	0.0895909	0.0883608	0.0605652	0.0269018	0.192083
479.4	-0.2642	-4.7688	-1.7091	-2.5323	11.7683	-3.1785	5.9314	5.6753	3.1206		479.4	0.27935	0.1636	0.18012	0.16138	0.0749	0.09645	0.06444	0.10388	0.18088												479.4	0.268141	0.150439	0.161908	0.16056	0.0802709	0.0954508	0.0576652	0.0657518	0.187493
481.5	-0.2437	-4.7421	-1.6822	-2.562	11.7648	-3.2233	5.9379	5.6681	3.109		481.5	0.3017	0.1905	0.20619	0.13185	0.07257	0.05184	0.07123	0.09553	0.16849												481.5	0.290491	0.177339	0.187978	0.13103	0.0779409	0.0508408	0.0644552	0.0574018	0.175103
483.6	-0.2409	-4.7421	-1.6652	-2.5644	11.6917	-3.2992	5.889	5.6741	3.136		483.6	0.30635	0.19069	0.22236	0.12961	0.000646117	-0.02387	0.02263	0.10037	0.1947												483.6	0.295141	0.177529	0.204148	0.12879	0.00601706	-0.0248692	0.0158552	0.0622418	0.201313
485.7	-0.271	-4.6888	-1.6737	-2.543	11.6499	-3.2406	5.8239	5.6693	3.0742		485.7	0.2781	0.24419	0.21303	0.15118	-0.03998	0.03492	-0.04217	0.09442	0.1321												485.7	0.266891	0.231029	0.194818	0.15036	-0.0346091	0.0339208	-0.0489448	0.0562918	0.138713
487.8	-0.2642	-4.6688	-1.6624	-2.5561	11.7161	-3.2096	5.8727	5.7226	3.0884		487.8	0.28676	0.26439	0.2235	0.13824	0.0274	0.06611	0.00692	0.14657	0.14551												487.8	0.275551	0.251229	0.205288	0.13742	0.0327709	0.0651108	0.000145224	0.108442	0.152123
489.9	-0.2834	-4.7055	-1.6439	-2.5573	11.6812	-3.2509	5.9053	5.7287	3.1013		489.9	0.26941	0.22789	0.24118	0.1372	-0.00633	0.025	0.03982	0.15151	0.15762												489.9	0.258201	0.214729	0.222968	0.13638	-0.000959056	0.0240008	0.0330452	0.113382	0.164233
492	-0.2628	-4.7755	-1.6666	-2.5502	11.7405	-3.2613	5.8532	5.679	3.1206		492	0.29186	0.15808	0.21765	0.14447	0.05415	0.01479	-0.01198	0.10066	0.17613												492	0.280651	0.144919	0.199438	0.14365	0.0595209	0.0137908	-0.0187548	0.0625318	0.182743
494.1	-0.2697	-4.7721	-1.6652	-2.5704	11.7892	-3.1544	5.8499	5.6669	3.0948		494.1	0.28681	0.16168	0.21822	0.12443	0.10402	0.12188	-0.01499	0.0874	0.14954												494.1	0.275601	0.148519	0.200008	0.12361	0.109391	0.120881	-0.0217648	0.0492718	0.156153
496.2	-0.2834	-4.7688	-1.6723	-2.5632	11.8554	-3.1509	5.9183	5.679	3.1334		496.2	0.27496	0.16518	0.21029	0.1318	0.1714	0.12557	0.05371	0.09835	0.18734												496.2	0.263751	0.152019	0.192078	0.13098	0.176771	0.124571	0.0469352	0.0602218	0.193953
498.3	-0.256	-4.7588	-1.7006	-2.5537	11.8275	-3.2406	5.9574	5.6984	3.1412		498.3	0.30421	0.17538	0.18117	0.14146	0.14467	0.03606	0.09311	0.1166	0.19435												498.3	0.293001	0.162219	0.162958	0.14064	0.150041	0.0350608	0.0863352	0.0784718	0.200963
500.4	-0.2505	-4.8488	-1.685	-2.5692	11.7892	-3.1613	5.9509	5.6863	3.1321		500.4	0.31156	0.08557	0.19594	0.12613	0.10755	0.11555	0.0869	0.10334	0.18446												500.4	0.300351	0.0724095	0.177728	0.12531	0.112921	0.114551	0.0801252	0.0652118	0.191073
502.5	-0.2929	-4.8221	-1.6921	-2.5799	11.7753	-3.244	5.9444	5.7202	3.1141		502.5	0.27101	0.11247	0.18801	0.11559	0.09483	0.03304	0.0807	0.13609	0.16567												502.5	0.259801	0.0993095	0.169798	0.11477	0.100201	0.0320408	0.0739252	0.0979618	0.172283
504.6	-0.2738	-4.8355	-1.6879	-2.5549	11.7962	-3.2751	5.8695	5.6766	3.1038		504.6	0.29196	0.09927	0.19138	0.14075	0.1169	0.00213	0.0061	0.09134	0.15457												504.6	0.280751	0.0861095	0.173168	0.13993	0.122271	0.00113083	-0.000674776	0.0532118	0.161183
506.7	-0.2574	-4.7688	-1.695	-2.5478	11.7265	-3.2785	5.8727	5.6523	3.1064		506.7	0.31021	0.16617	0.18346	0.14802	0.04838	-0.00108	0.00959	0.06588	0.15638												506.7	0.299001	0.153009	0.165248	0.1472	0.0537509	-0.00207917	0.00281522	0.0277518	0.162993
508.8	-0.2765	-4.8088	-1.6964	-2.5478	11.7683	-3.2165	5.8825	5.679	3.1013		508.8	0.29296	0.12636	0.18123	0.14818	0.09135	0.06111	0.01969	0.09143	0.15049												508.8	0.281751	0.113199	0.163018	0.14736	0.0967209	0.0601108	0.0129152	0.0533018	0.157103
510.9	-0.3107	-4.7421	-1.6808	-2.5644	11.7509	-3.1544	5.8499	5.702	3.1		510.9	0.26061	0.19326	0.196	0.13175	0.07513	0.1234	-0.01261	0.11328	0.1484												510.9	0.249401	0.180099	0.177788	0.13093	0.0805009	0.122401	-0.0193848	0.0751518	0.155013
513	-0.3094	-4.7188	-1.6822	-2.5537	11.7962	-3.2371	5.7815	5.622	3.1038		513	0.26376	0.21676	0.19377	0.14261	0.1216	0.04089	-0.08072	0.03212	0.15141												513	0.252551	0.203599	0.175558	0.14179	0.126971	0.0398908	-0.0874948	-0.00600821	0.158023
515.1	-0.2738	-4.7188	-1.702	-2.5549	11.7614	-3.2647	5.8337	5.6511	3.0948		515.1	0.30121	0.21696	0.17315	0.14158	0.08798	0.01347	-0.02822	0.06007	0.14161												515.1	0.290001	0.203799	0.154938	0.14076	0.0933509	0.0124708	-0.0349948	0.0219418	0.148223
517.2	-0.3053	-4.7288	-1.7205	-2.5656	11.6847	-3.2751	5.8727	5.6644	3.1206		517.2	0.27156	0.20715	0.15382	0.13104	0.01245	0.00326	0.01108	0.07222	0.16662												517.2	0.260351	0.193989	0.135608	0.13022	0.0178209	0.00226083	0.00430522	0.0340918	0.173233
519.3	-0.3258	-4.7721	-1.6992	-2.549	11.6778	-3.2682	5.9216	5.6875	3.1347		519.3	0.25291	0.16405	0.17429	0.1478	0.00673	0.01035	0.06027	0.09416	0.17993												519.3	0.241701	0.150889	0.156078	0.14698	0.0121009	0.00935083	0.0534952	0.0560318	0.186543
521.4	-0.3135	-4.8821	-1.6794	-2.5751	11.7196	-3.2406	5.8923	5.6814	3.1193		521.4	0.26706	0.05425	0.19326	0.12187	0.04971	0.03814	0.03127	0.08691	0.16374												521.4	0.255851	0.0410895	0.175048	0.12105	0.0550809	0.0371408	0.0244952	0.0487818	0.170353
523.5	-0.3176	-4.8221	-1.651	-2.5846	11.8101	-3.3061	5.863	5.6705	3.1154		523.5	0.26481	0.11445	0.22084	0.11253	0.14138	-0.02717	0.00227	0.07486	0.15904												523.5	0.253601	0.101289	0.202628	0.11171	0.146751	-0.0281692	-0.00450478	0.0367318	0.165653
525.6	-0.308	-4.7655	-1.6553	-2.5252	11.7544	-3.1751	5.8923	5.6693	3.1013		525.6	0.27626	0.17124	0.21571	0.1721	0.08686	0.10402	0.03186	0.0725	0.14415												525.6	0.265051	0.158079	0.197498	0.17128	0.0922309	0.103021	0.0250852	0.0343718	0.150763
527.7	-0.2875	-4.7821	-1.6865	-2.5098	11.7335	-3.1992	5.8955	5.6705	3.1334		527.7	0.29861	0.15484	0.18368	0.18766	0.06713	0.08011	0.03536	0.07255	0.17546												527.7	0.287401	0.141679	0.165468	0.18684	0.0725009	0.0791108	0.0285852	0.0344218	0.182073
529.8	-0.308	-4.7521	-1.7205	-2.5264	11.7439	-3.1716	5.8369	5.7275	3.1283		529.8	0.27996	0.18504	0.14885	0.17123	0.07871	0.1079	-0.02294	0.1284	0.16957												529.8	0.268751	0.171879	0.130638	0.17041	0.0840809	0.106901	-0.0297148	0.0902718	0.176183
531.9	-0.3107	-4.7388	-1.6879	-2.549	11.7892	-3.2406	5.9021	5.7311	3.1373		531.9	0.27911	0.19854	0.18063	0.14879	0.12518	0.03909	0.04255	0.13084	0.17778												531.9	0.267901	0.185379	0.162418	0.14797	0.130551	0.0380908	0.0357752	0.0927118	0.184393
534	-0.2765	-4.7388	-1.685	-2.562	11.8345	-3.2371	5.8825	5.6972	3.1476		534	0.31516	0.19873	0.1827	0.13595	0.17166	0.04278	0.02325	0.09579	0.18728												534	0.303951	0.185569	0.164488	0.13513	0.177031	0.0417808	0.0164752	0.0576618	0.193893
536.1	-0.2738	-4.8021	-1.6638	-2.5478	11.7997	-3.3268	5.8402	5.7129	3.1373		536.1	0.31971	0.13563	0.20307	0.15032	0.13803	-0.04673	-0.01875	0.11033	0.17619												536.1	0.308501	0.122469	0.184858	0.1495	0.143401	-0.0477292	-0.0255248	0.0722018	0.182803
538.2	-0.2847	-4.7388	-1.6652	-2.562	11.8066	-3.2923	5.8499	5.6923	3.1579		538.2	0.31066	0.19913	0.20084	0.13628	0.14611	-0.01204	-0.00876	0.08858	0.196												538.2	0.299451	0.185969	0.182628	0.13546	0.151481	-0.0130392	-0.0155348	0.0504518	0.202613
540.3	-0.2793	-4.7321	-1.6666	-2.568	11.73	-3.3199	5.8337	5.7057	3.1296		540.3	0.31791	0.20603	0.19862	0.13045	0.07069	-0.03945	-0.02466	0.10083	0.16691												540.3	0.306701	0.192869	0.180408	0.12963	0.0760609	-0.0404492	-0.0314348	0.0627018	0.173523
542.4	-0.3066	-4.7621	-1.6638	-2.5715	11.7056	-3.3061	5.876	5.6717	3.1605		542.4	0.29246	0.17622	0.20059	0.12711	0.04746	-0.02546	0.01794	0.06567	0.19701												542.4	0.281251	0.163059	0.182378	0.12629	0.0528309	-0.0264592	0.0111652	0.0275418	0.203623
544.5	-0.2888	-4.7955	-1.6283	-2.549	11.7614	-3.3543	5.9281	5.6875	3.1424		544.5	0.31211	0.14302	0.23526	0.14978	0.10444	-0.07347	0.07033	0.08032	0.17812												544.5	0.300901	0.129859	0.217048	0.14896	0.109811	-0.0744692	0.0635552	0.0421918	0.184733
546.6	-0.271	-4.7288	-1.6468	-2.5347	11.7196	-3.3337	5.8825	5.7081	3.1823		546.6	0.33176	0.20992	0.21593	0.16424	0.06381	-0.05268	0.02503	0.09977	0.21723												546.6	0.320551	0.196759	0.197718	0.16342	0.0691809	-0.0536792	0.0182552	0.0616418	0.223843
548.7	-0.2656	-4.7788	-1.6765	-2.5858	11.7892	-3.2751	5.8955	5.7129	3.1695		548.7	0.33901	0.16012	0.18541	0.1133	0.13459	0.00611	0.03833	0.10341	0.20364												548.7	0.327801	0.146959	0.167198	0.11248	0.139961	0.00511083	0.0315552	0.0652818	0.210253
550.8	-0.3025	-4.6988	-1.6865	-2.6084	11.7788	-3.2785	5.8727	5.7093	3.1617		550.8	0.30396	0.24031	0.17458	0.09087	0.12536	0.0029	0.01582	0.09866	0.19505												550.8	0.292751	0.227149	0.156368	0.0900496	0.130731	0.00190083	0.00904522	0.0605318	0.201663
552.9	-0.3217	-4.7855	-1.6836	-2.6226	11.7927	-3.2544	5.8011	5.7008	3.1502		552.9	0.28662	0.15381	0.17665	0.07683	0.14044	0.02719	-0.05548	0.08901	0.18275												552.9	0.275411	0.140649	0.158438	0.0760096	0.145811	0.0261908	-0.0622548	0.0508818	0.189363
555	-0.271	-4.8021	-1.6836	-2.5644	11.7474	-3.2406	5.8727	5.7105	3.1502		555	0.33917	0.13741	0.17582	0.1352	0.09631	0.04118	0.01642	0.09755	0.18196												555	0.327961	0.124249	0.157608	0.13438	0.101681	0.0401808	0.00964522	0.0594218	0.188573
557.1	-0.2875	-4.7288	-1.702	-2.5989	11.7126	-3.1923	5.8923	5.7214	3.1399		557.1	0.32452	0.21091	0.1566	0.10086	0.06269	0.08967	0.03632	0.1073	0.17087												557.1	0.313311	0.197749	0.138388	0.10004	0.0680609	0.0886708	0.0295452	0.0691718	0.177483
559.2	-0.3039	-4.7222	-1.7247	-2.5953	11.7265	-3.1509	5.8793	5.7336	3.1257		559.2	0.30997	0.2177	0.13307	0.10463	0.07777	0.13126	0.02361	0.11835	0.15588												559.2	0.298761	0.204539	0.114858	0.10381	0.0831409	0.130261	0.0168352	0.0802218	0.162493
561.3	-0.3231	-4.6955	-1.6808	-2.6036	11.8136	-3.1958	5.889	5.7129	3.1489		561.3	0.29262	0.2446	0.17614	0.09649	0.16604	0.08655	0.03361	0.09649	0.17828												561.3	0.281411	0.231439	0.157928	0.0956696	0.171411	0.0855508	0.0268352	0.0583618	0.184893
563.4	-0.297	-4.7421	-1.6822	-2.5965	11.7857	-3.2509	5.8467	5.7226	3.145		563.4	0.32057	0.1982	0.17391	0.10375	0.13932	0.03164	-0.00839	0.10504	0.17359												563.4	0.309361	0.185039	0.155698	0.10293	0.144691	0.0306408	-0.0151648	0.0669118	0.180203
565.5	-0.2546	-4.6722	-1.6496	-2.5989	11.7962	-3.3785	5.8565	5.6984	3.163		565.5	0.36482	0.2683	0.20569	0.10152	0.15099	-0.09578	0.0017	0.07969	0.1908												565.5	0.353611	0.255139	0.187478	0.1007	0.156361	-0.0967792	-0.00507478	0.0415618	0.197413
567.6	-0.2793	-4.7188	-1.6411	-2.6013	11.7509	-3.2923	5.8988	5.7323	3.1785		567.6	0.34197	0.22189	0.21336	0.09928	0.10687	-0.00939	0.0443	0.11243	0.20551												567.6	0.330761	0.208729	0.195148	0.0984596	0.112241	-0.0103892	0.0375252	0.0743018	0.212123
569.7	-0.2984	-4.7355	-1.6255	-2.5929	11.7161	-3.375	5.9151	5.7178	3.1913		569.7	0.32472	0.20539	0.22813	0.10785	0.07324	-0.0919	0.0609	0.09678	0.21752												569.7	0.313511	0.192229	0.209918	0.10703	0.0786109	-0.0928992	0.0541252	0.0586518	0.224133
571.8	-0.2929	-4.8221	-1.5929	-2.5763	11.7614	-3.3612	5.8923	5.7117	3.1849		571.8	0.33207	0.11899	0.2599	0.12461	0.11972	-0.07791	0.03839	0.08953	0.21032												571.8	0.320861	0.105829	0.241688	0.12379	0.125091	-0.0789092	0.0316152	0.0514018	0.216933
573.9	-0.2861	-4.8288	-1.6057	-2.5692	11.7056	-3.2854	5.876	5.6996	3.1553		573.9	0.34072	0.11249	0.24628	0.13188	0.06509	-0.00192	0.02239	0.07627	0.17993												573.9	0.329511	0.0993295	0.228068	0.13106	0.0704609	-0.00291917	0.0156152	0.0381418	0.186543
576	-0.2738	-4.7421	-1.6368	-2.5775	11.6847	-3.2509	5.863	5.7214	3.1978		576	0.35487	0.19938	0.21435	0.12374	0.04537	0.03277	0.00969	0.09692	0.22164												576	0.343661	0.186219	0.196138	0.12292	0.0507409	0.0317708	0.00291522	0.0587918	0.228253
578.1	-0.2806	-4.7755	-1.6411	-2.5502	11.6743	-3.2578	5.8923	5.7178	3.2119		578.1	0.34992	0.16618	0.20922	0.1512	0.03614	0.02606	0.03928	0.09216	0.23495												578.1	0.338711	0.153019	0.191008	0.15038	0.0415109	0.0250608	0.0325052	0.0540318	0.241563
580.2	-0.2998	-4.7355	-1.6397	-2.5668	11.6708	-3.2544	5.8695	5.7069	3.1926		580.2	0.33257	0.20638	0.20979	0.13477	0.03382	0.02965	0.01678	0.08011	0.21485												580.2	0.321361	0.193219	0.191578	0.13395	0.0391909	0.0286508	0.0100052	0.0419818	0.221463
582.3	-0.3313	-4.6422	-1.651	-2.568	11.7091	-3.3061	5.876	5.6911	3.181		582.3	0.30292	0.29988	0.19767	0.13373	0.0733	-0.02186	0.02358	0.06316	0.20246												582.3	0.291711	0.286719	0.179458	0.13291	0.0786709	-0.0228592	0.0168052	0.0250318	0.209073
584.4	-0.2916	-4.7321	-1.6709	-2.5573	11.7335	-3.3199	5.8271	5.7081	3.1798		584.4	0.34447	0.21017	0.17694	0.1446	0.09887	-0.03547	-0.02503	0.079	0.20047												584.4	0.333261	0.197009	0.158728	0.14378	0.104241	-0.0364692	-0.0318048	0.0408718	0.207083
586.5	-0.3231	-4.7888	-1.6737	-2.5478	11.5942	-3.3337	5.8304	5.6911	3.172		586.5	0.31482	0.15367	0.17331	0.15426	-0.03925	-0.04908	-0.02143	0.06085	0.19188												586.5	0.303611	0.140509	0.155098	0.15344	-0.0338791	-0.0500792	-0.0282048	0.0227218	0.198493
588.6	-0.282	-4.7421	-1.7006	-2.5644	11.6499	-3.2854	5.863	5.7093	3.145		588.6	0.35777	0.20057	0.14558	0.13783	0.01762	-0.000589622	0.01147	0.0779	0.16409												588.6	0.346561	0.187409	0.127368	0.13701	0.0229909	-0.0015888	0.00469522	0.0397718	0.170703
590.7	-0.3135	-4.7621	-1.6709	-2.568	11.6708	-3.2682	5.889	5.7105	3.1476		590.7	0.32812	0.18077	0.17446	0.13439	0.0397	0.0168	0.03776	0.07794	0.16589												590.7	0.316911	0.167609	0.156248	0.13357	0.0450709	0.0158008	0.0309852	0.0398118	0.172503
592.8	-0.334	-4.7321	-1.6865	-2.5692	11.6534	-3.2751	5.8011	5.7251	3.1386		592.8	0.30947	0.21096	0.15803	0.13336	0.02347	0.01009	-0.04984	0.09139	0.1561												592.8	0.298261	0.197799	0.139818	0.13254	0.0288409	0.00909083	-0.0566148	0.0532618	0.162713
594.9	-0.3422	-4.6988	-1.6468	-2.5276	11.6638	-3.2682	5.8858	5.7105	3.1617		594.9	0.30312	0.24446	0.1969	0.17512	0.03505	0.01718	0.03516	0.07564	0.17841												594.9	0.291911	0.231299	0.178688	0.1743	0.0404209	0.0161808	0.0283852	0.0375118	0.185023
597	-0.3477	-4.6922	-1.6496	-2.5288	11.6011	-3.3199	5.8727	5.7069	3.127		597	0.29947	0.25126	0.19327	0.17408	-0.02648	-0.03433	0.02235	0.07088	0.14292												597	0.288261	0.238099	0.175058	0.17326	-0.0211091	-0.0353292	0.0155752	0.0327518	0.149533
599.1	-0.3326	-4.6255	-1.6935	-2.5466	11.6116	-3.4164	5.8988	5.7214	3.1257		599.1	0.31642	0.31816	0.14855	0.15645	-0.0148	-0.13064	0.04875	0.08423	0.14082												599.1	0.305211	0.304999	0.130338	0.15563	-0.00942906	-0.131639	0.0419752	0.0461018	0.147433
601.2	-0.3532	-4.7055	-1.6794	-2.5632	11.6011	-3.3819	5.8793	5.7239	3.1373		601.2	0.29767	0.23835	0.16182	0.14001	-0.02412	-0.09595	0.02955	0.08558	0.15163												601.2	0.286461	0.225189	0.143608	0.13919	-0.0187491	-0.0969492	0.0227752	0.0474518	0.158243
603.3	-0.3176	-4.6755	-1.6099	-2.562	11.6952	-3.3095	5.8727	5.7469	3.1514		603.3	0.33512	0.26855	0.23049	0.14138	0.07115	-0.02336	0.02324	0.10742	0.16494												603.3	0.323911	0.255389	0.212278	0.14056	0.0765209	-0.0243592	0.0164652	0.0692918	0.171553
605.4	-0.3285	-4.7155	-1.6198	-2.5323	11.6743	-3.3095	5.8141	5.7602	3.1888		605.4	0.32607	0.22875	0.21976	0.17124	0.05143	-0.02317	-0.03506	0.11957	0.20155												605.4	0.314861	0.215589	0.201548	0.17042	0.0568009	-0.0241692	-0.0418348	0.0814418	0.208163
607.5	-0.3436	-4.7655	-1.6624	-2.5442	11.6395	-3.3061	5.8825	5.7821	3.1965		607.5	0.31282	0.17895	0.17634	0.15951	0.0178	-0.01958	0.03364	0.14032	0.20846												607.5	0.301611	0.165789	0.158128	0.15869	0.0231709	-0.0205792	0.0268652	0.102192	0.215073
609.6	-0.3409	-4.7188	-1.651	-2.5335	11.7091	-3.2854	5.7978	5.7554	3.1746		609.6	0.31737	0.22584	0.18691	0.17037	0.08858	0.00131	-0.05077	0.11246	0.18576												609.6	0.306161	0.212679	0.168698	0.16955	0.0939509	0.000310826	-0.0575448	0.0743318	0.192373
611.7	-0.3463	-4.7022	-1.6652	-2.5668	11.7962	-3.2233	5.8597	5.7675	3.1823		611.7	0.31382	0.24264	0.17188	0.13723	0.17685	0.0636	0.01143	0.12341	0.19267												611.7	0.302611	0.229479	0.153668	0.13641	0.182221	0.0626008	0.00465522	0.0852818	0.199283
613.8	-0.3258	-4.7555	-1.6539	-2.5454	11.7857	-3.2371	5.889	5.7263	3.1476		613.8	0.33617	0.18954	0.18235	0.1588	0.16753	0.04999	0.04103	0.08106	0.15718												613.8	0.324961	0.176379	0.164138	0.15798	0.172901	0.0489908	0.0342552	0.0429318	0.163793
615.9	-0.3258	-4.7288	-1.6624	-2.5418	11.6743	-3.3268	5.8727	5.7433	3.1502		615.9	0.33803	0.21643	0.17303	0.16256	0.0573	-0.03953	0.02502	0.0969	0.15899												615.9	0.326821	0.203269	0.154818	0.16174	0.0626709	-0.0405292	0.0182452	0.0587718	0.165603
618	-0.3012	-4.6955	-1.6694	-2.5513	11.6812	-3.313	5.8597	5.7663	3.1888		618	0.36448	0.24993	0.1652	0.15323	0.06538	-0.02554	0.01232	0.11875	0.19679												618	0.353271	0.236769	0.146988	0.15241	0.0707509	-0.0265392	0.00554522	0.0806218	0.203403
620.1	-0.2957	-4.7421	-1.6737	-2.5644	11.629	-3.2475	5.8955	5.7614	3.181		620.1	0.37183	0.20353	0.16007	0.14029	0.01436	0.04015	0.04842	0.11269	0.1882												620.1	0.360621	0.190369	0.141858	0.13947	0.0197309	0.0391508	0.0416452	0.0745618	0.194813
622.2	-0.36	-4.7688	-1.6652	-2.5977	11.6464	-3.2165	5.9379	5.7687	3.1656		622.2	0.30938	0.17703	0.16774	0.10716	0.03293	0.07134	0.09111	0.11884	0.17201												622.2	0.298171	0.163869	0.149528	0.10634	0.0383009	0.0703408	0.0843352	0.0807118	0.178623
624.3	-0.3477	-4.7721	-1.6184	-2.5371	11.6325	-3.2406	5.9216	5.7287	3.1798		624.3	0.32353	0.17392	0.21372	0.16792	0.02021	0.04743	0.07511	0.07769	0.18542												624.3	0.312321	0.160759	0.195508	0.1671	0.0255809	0.0464308	0.0683352	0.0395618	0.192033
626.4	-0.3545	-4.6955	-1.6652	-2.5513	11.629	-3.2233	5.8499	5.7566	3.1862		626.4	0.31858	0.25072	0.16609	0.15388	0.01788	0.06492	0.00371	0.10443	0.19103												626.4	0.307371	0.237559	0.147878	0.15306	0.0232509	0.0639208	-0.00306478	0.0663018	0.197643
628.5	-0.3258	-4.5855	-1.6624	-2.562	11.6011	-3.2233	5.9021	5.7566	3.1862		628.5	0.34913	0.36092	0.16806	0.14335	-0.00884	0.06511	0.0562	0.10328	0.19023												628.5	0.337921	0.347759	0.149848	0.14253	-0.00346906	0.0641108	0.0494252	0.0651518	0.196843
630.6	-0.3367	-4.6722	-1.6425	-2.5751	11.6569	-3.182	5.8369	5.7602	3.181		630.6	0.34008	0.27442	0.18713	0.13041	0.04813	0.1066	-0.0087	0.10573	0.18424												630.6	0.328871	0.261259	0.168918	0.12959	0.0535009	0.105601	-0.0154748	0.0676018	0.190853
632.7	-0.334	-4.6888	-1.6113	-2.5775	11.6847	-3.2509	5.8141	5.7239	3.1991		632.7	0.34463	0.25801	0.21751	0.12818	0.07711	0.03789	-0.0312	0.06827	0.20155												632.7	0.333421	0.244849	0.199298	0.12736	0.0824809	0.0368908	-0.0379748	0.0301418	0.208163
634.8	-0.3285	-4.6622	-1.6454	-2.5834	11.8206	-3.2682	5.8532	5.7348	3.1978		634.8	0.35198	0.28481	0.18258	0.12244	0.21418	0.02078	0.00819	0.07802	0.19946												634.8	0.340771	0.271649	0.164368	0.12162	0.219551	0.0197808	0.00141522	0.0398918	0.206073
636.9	-0.3313	-4.6255	-1.7091	-2.5715	11.737	-3.3509	5.8695	5.7433	3.1875		636.9	0.35103	0.32171	0.11805	0.13451	0.13176	-0.06173	0.02479	0.08537	0.18836												636.9	0.339821	0.308549	0.0998382	0.13369	0.137131	-0.0627292	0.0180152	0.0472418	0.194973
639	-0.3504	-4.5655	-1.685	-2.5834	11.6569	-3.2647	5.8695	5.7457	3.2106		639	0.33378	0.38191	0.14132	0.12277	0.05284	0.02466	0.02509	0.08661	0.21067												639	0.322571	0.368749	0.123108	0.12195	0.0582109	0.0236608	0.0183152	0.0484818	0.217283
641.1	-0.3477	-4.6155	-1.634	-2.6084	11.737	-3.282	5.7946	5.7578	3.2248		641.1	0.33833	0.3321	0.1915	0.09793	0.13411	0.00755	-0.04952	0.09756	0.22408												641.1	0.327121	0.318939	0.173288	0.0971096	0.139481	0.00655083	-0.0562948	0.0594318	0.230693
643.2	-0.3258	-4.5922	-1.6581	-2.5644	11.6569	-3.3337	5.7815	5.7408	3.2209		643.2	0.36208	0.3556	0.16657	0.1421	0.05519	-0.04396	-0.06232	0.07941	0.21939												643.2	0.350871	0.342439	0.148358	0.14128	0.0605609	-0.0449592	-0.0690948	0.0412818	0.226003
645.3	-0.3025	-4.7388	-1.6524	-2.5585	11.6186	-3.2888	5.749	5.7348	3.2003		645.3	0.38723	0.2092	0.17144	0.14816	0.01806	0.00113	-0.09452	0.07225	0.198												645.3	0.376021	0.196039	0.153228	0.14734	0.0234309	0.000130826	-0.101295	0.0341218	0.204613
647.4	-0.3066	-4.7455	-1.6425	-2.5715	11.6638	-3.2785	5.7555	5.7724	3.2016		647.4	0.38498	0.2027	0.18051	0.13533	0.06444	0.01162	-0.08773	0.1087	0.1985												647.4	0.373771	0.189539	0.162298	0.13451	0.0698109	0.0106208	-0.0945048	0.0705718	0.205113
649.5	-0.3354	-4.7855	-1.634	-2.5977	11.7056	-3.1889	5.8597	5.7554	3.1926		649.5	0.35803	0.16289	0.18819	0.10929	0.10741	0.10141	0.01677	0.09055	0.18871												649.5	0.346821	0.149729	0.169978	0.10847	0.112781	0.100411	0.00999522	0.0524218	0.195323
651.6	-0.3326	-4.7688	-1.651	-2.612	11.6534	-3.2716	5.8369	5.7724	3.2029		651.6	0.36268	0.17979	0.17036	0.09516	0.05639	0.0189	-0.00573	0.10639	0.19822												651.6	0.351471	0.166629	0.152148	0.0943396	0.0617609	0.0179008	-0.0125048	0.0682618	0.204833
653.7	-0.3285	-4.6488	-1.6227	-2.5858	11.7021	-3.3612	5.8955	5.7408	3.2094		653.7	0.36863	0.29999	0.19783	0.12152	0.10626	-0.07051	0.05317	0.07364	0.20393												653.7	0.357421	0.286829	0.179618	0.1207	0.111631	-0.0715092	0.0463952	0.0355118	0.210543
655.8	-0.3381	-4.7122	-1.6298	-2.5811	11.6395	-3.2854	5.8565	5.7287	3.239		655.8	0.36088	0.23679	0.1899	0.12638	0.04484	0.00548	0.01446	0.06039	0.23273												655.8	0.349671	0.223629	0.171688	0.12556	0.0502109	0.00448083	0.00768522	0.0222618	0.239343
657.9	-0.3162	-4.7222	-1.6454	-2.5989	11.535	-3.2406	5.9444	5.7602	3.2158		657.9	0.38463	0.22698	0.17348	0.10875	-0.05849	0.05047	0.10266	0.09073	0.20874												657.9	0.373421	0.213819	0.155268	0.10793	-0.0531191	0.0494708	0.0958852	0.0526018	0.215353
660	-0.3805	-4.6788	-1.6567	-2.6179	11.5907	-3.2682	5.8825	5.7724	3.2287		660	0.32218	0.27058	0.16135	0.08991	-0.00161	0.02306	0.04106	0.10178	0.22085												660	0.310971	0.257419	0.143138	0.0890896	0.00376094	0.0220608	0.0342852	0.0636518	0.227463
662.1	-0.3655	-4.7855	-1.634	-2.5989	11.6534	-3.3233	5.876	5.7554	3.2106		662.1	0.33903	0.16408	0.18322	0.10908	0.06227	-0.03185	0.03485	0.08362	0.20196												662.1	0.327821	0.150919	0.165008	0.10826	0.0676409	-0.0328492	0.0280752	0.0454918	0.208573
664.2	-0.3847	-4.7855	-1.6227	-2.5953	11.6812	-3.244	5.8304	5.7384	3.2287		664.2	0.32168	0.16428	0.19369	0.11284	0.09124	0.04764	-0.01045	0.06547	0.21927												664.2	0.310471	0.151119	0.175478	0.11202	0.0966109	0.0466408	-0.0172248	0.0273418	0.225883
666.3	-0.3586	-4.7988	-1.6581	-2.5585	11.6429	-3.2578	5.8532	5.7384	3.2261		666.3	0.34963	0.15117	0.15747	0.14981	0.05412	0.03402	0.01265	0.06432	0.21587												666.3	0.338421	0.138009	0.139258	0.14899	0.0594909	0.0330208	0.00587522	0.0261918	0.222483
668.4	-0.3669	-4.7388	-1.651	-2.6108	11.6325	-3.3061	5.8955	5.7772	3.2364		668.4	0.34318	0.21137	0.16374	0.09767	0.04489	-0.01409	0.05524	0.10196	0.22538												668.4	0.331971	0.198209	0.145528	0.0968496	0.0502609	-0.0150892	0.0484652	0.0638318	0.231993
670.5	-0.3764	-4.7122	-1.6524	-2.6001	11.5977	-3.3026	5.8923	5.7736	3.2287		670.5	0.33553	0.23817	0.16151	0.10853	0.01127	-0.0104	0.05234	0.09721	0.21689												670.5	0.324321	0.225009	0.143298	0.10771	0.0166409	-0.0113992	0.0455652	0.0590818	0.223503
672.6	-0.3901	-4.7355	-1.6269	-2.562	11.6534	-3.2613	5.9021	5.7663	3.2132		672.6	0.32368	0.21507	0.18618	0.1468	0.06814	0.03109	0.06244	0.08876	0.2006												672.6	0.312471	0.201909	0.167968	0.14598	0.0735109	0.0300908	0.0556652	0.0506318	0.207213
674.7	-0.3778	-4.6955	-1.6496	-2.6013	11.6812	-3.2992	5.9379	5.7966	3.2248		674.7	0.33783	0.25526	0.16266	0.10766	0.09712	-0.00662	0.09853	0.1179	0.2114												674.7	0.326621	0.242099	0.144448	0.10684	0.102491	-0.00761917	0.0917552	0.0797718	0.218013
676.8	-0.3669	-4.7255	-1.6751	-2.5609	11.6395	-3.3268	5.8923	5.8148	3.2274		676.8	0.35058	0.22546	0.13633	0.14823	0.05659	-0.03403	0.05323	0.13495	0.21321												676.8	0.339371	0.212299	0.118118	0.14741	0.0619609	-0.0350292	0.0464552	0.0968218	0.219823
678.9	-0.3983	-4.7688	-1.6425	-2.5715	11.5802	-3.344	5.9151	5.8124	3.1965		678.9	0.32104	0.18236	0.1681	0.13779	-0.00153	-0.05104	0.07633	0.1314	0.18152												678.9	0.309831	0.169199	0.149888	0.13697	0.00384094	-0.0520392	0.0695552	0.0932718	0.188133
681	-0.3929	-4.7321	-1.6539	-2.5787	11.5872	-3.2957	5.8239	5.7918	3.2235		681	0.32829	0.21926	0.15587	0.13076	0.00665	-0.00255	-0.01458	0.10964	0.20773												681	0.317081	0.206099	0.137658	0.12994	0.0120209	-0.00354917	-0.0213548	0.0715118	0.214343
683.1	-0.4545	-4.7555	-1.6128	-2.587	11.5559	-3.3371	5.7359	5.7748	3.2312		683.1	0.26854	0.19605	0.19614	0.12262	-0.02348	-0.04376	-0.10228	0.09149	0.21464												683.1	0.257331	0.182889	0.177928	0.1218	-0.0181091	-0.0447592	-0.109055	0.0533618	0.221253
685.2	-0.4257	-4.8155	-1.6312	-2.5811	11.5907	-3.4198	5.8662	5.7736	3.2145		685.2	0.29919	0.13625	0.17692	0.12868	0.0125	-0.12627	0.02832	0.08914	0.19714												685.2	0.287981	0.123089	0.158708	0.12786	0.0178709	-0.127269	0.0215452	0.0510118	0.203753
687.3	-0.3929	-4.7888	-1.6468	-2.562	11.535	-3.3475	5.8369	5.7857	3.2583		687.3	0.33384	0.16315	0.16049	0.14795	-0.04203	-0.05378	-0.000687221	0.10008	0.24015												687.3	0.322631	0.149989	0.142278	0.14713	-0.0366591	-0.0547792	-0.007462	0.0619518	0.246763
689.4	-0.412	-4.7255	-1.6128	-2.5727	11.5315	-3.3337	5.9086	5.7869	3.2621		689.4	0.31659	0.22665	0.19366	0.13741	-0.04435	-0.03979	0.07131	0.10013	0.24316												689.4	0.305381	0.213489	0.175448	0.13659	-0.0389791	-0.0407892	0.0645352	0.0620018	0.249773
691.5	-0.412	-4.7721	-1.6071	-2.5573	11.6708	-3.282	5.9118	5.7602	3.3226		691.5	0.31844	0.18024	0.19853	0.15298	0.09612	0.0121	0.07481	0.07228	0.30287												691.5	0.307231	0.167079	0.180318	0.15216	0.101491	0.0111008	0.0680352	0.0341518	0.309483
693.6	-0.3929	-4.7721	-1.6241	-2.568	11.6325	-3.2957	5.9705	5.7833	3.2994		693.6	0.33939	0.18044	0.18071	0.14244	0.059	-0.00141	0.1338	0.09422	0.27887												693.6	0.328181	0.167279	0.162498	0.14162	0.0643709	-0.00240917	0.127025	0.0560918	0.285483
695.7	-0.3833	-4.7555	-1.6269	-2.5799	11.6011	-3.2509	5.9444	5.7918	3.2969		695.7	0.35084	0.19724	0.17708	0.13071	0.02877	0.04358	0.108	0.10157	0.27558												695.7	0.339631	0.184079	0.158868	0.12989	0.0341409	0.0425808	0.101225	0.0634418	0.282193
697.8	-0.4038	-4.7521	-1.6439	-2.5478	11.5768	-3.3681	5.9183	5.8027	3.2634		697.8	0.33219	0.20084	0.15925	0.16297	0.00565	-0.07343	0.0822	0.11132	0.24129												697.8	0.320981	0.187679	0.141038	0.16215	0.0110209	-0.0744292	0.0754252	0.0731918	0.247903
699.9	-0.4394	-4.7055	-1.6397	-2.5811	11.5942	-3.2888	5.863	5.7845	3.2595		699.9	0.29844	0.24763	0.16262	0.12984	0.02423	0.00606	0.02719	0.09196	0.2366												699.9	0.287231	0.234469	0.144408	0.12902	0.0296009	0.00506083	0.0204152	0.0538318	0.243213
702	-0.4545	-4.7388	-1.651	-2.6096	11.6116	-3.2199	5.7881	5.7614	3.3046		702	0.28519	0.21453	0.1505	0.1015	0.0428	0.07515	-0.04741	0.06771	0.28091												702	0.273981	0.201369	0.132288	0.10068	0.0481709	0.0741508	-0.0541848	0.0295818	0.287523
704.1	-0.4326	-4.8455	-1.6638	-2.5751	11.6743	-3.1785	5.8109	5.7808	3.248		704.1	0.30894	0.10803	0.13687	0.13616	0.10668	0.11674	-0.02431	0.08595	0.22351												704.1	0.297731	0.0948695	0.118658	0.13534	0.112051	0.115741	-0.0310848	0.0478218	0.230123
706.2	-0.4161	-4.7288	-1.6723	-2.5858	11.5942	-3.1268	5.8239	5.7505	3.2467		706.2	0.32729	0.22493	0.12754	0.12563	0.02775	0.16863	-0.01102	0.0545	0.22142												706.2	0.316081	0.211769	0.109328	0.12481	0.0331209	0.167631	-0.0177948	0.0163718	0.228033
708.3	-0.4298	-4.8088	-1.6354	-2.5775	11.5628	-3.2233	5.8662	5.7748	3.2222		708.3	0.31544	0.14512	0.16361	0.13409	-0.00247	0.07232	0.03158	0.07765	0.19613												708.3	0.304231	0.131959	0.145398	0.13327	0.00290094	0.0713208	0.0248052	0.0395218	0.202743
710.4	-0.4463	-4.7755	-1.5858	-2.5882	11.5245	-3.2337	5.8271	5.8027	3.2557		710.4	0.30079	0.17862	0.21239	0.12356	-0.0396	0.06211	-0.00722	0.10439	0.22884												710.4	0.289581	0.165459	0.194178	0.12274	-0.0342291	0.0611108	-0.0139948	0.0662618	0.235453
712.5	-0.4394	-4.7721	-1.6085	-2.5799	11.6116	-3.2061	5.876	5.8015	3.2608		712.5	0.30954	0.18222	0.18886	0.13202	0.04868	0.0899	0.04197	0.10204	0.23314												712.5	0.298331	0.169059	0.170648	0.1312	0.0540509	0.0889008	0.0351952	0.0639118	0.239753
714.6	-0.4353	-4.7655	-1.6028	-2.5858	11.5837	-3.2371	5.8532	5.7893	3.2583		714.6	0.31549	0.18902	0.19373	0.12629	0.02195	0.05909	0.01947	0.08869	0.22985												714.6	0.304281	0.175859	0.175518	0.12547	0.0273209	0.0580908	0.0126952	0.0505618	0.236463
716.7	-0.4107	-4.7621	-1.5929	-2.5822	11.5733	-3.2165	5.8043	5.8172	3.2415		716.7	0.34194	0.19261	0.2028	0.13005	0.01273	0.07987	-0.02913	0.11543	0.21226												716.7	0.330731	0.179449	0.184588	0.12923	0.0181009	0.0788708	-0.0359048	0.0773018	0.218873
718.8	-0.4476	-4.6988	-1.5802	-2.5846	11.622	-3.244	5.8337	5.8124	3.2557		718.8	0.30689	0.25611	0.21468	0.12781	0.06261	0.05256	0.000563813	0.10948	0.22567												718.8	0.295681	0.242949	0.196468	0.12699	0.0679809	0.0515608	-0.00621096	0.0713518	0.232283
720.9	-0.4572	-4.6888	-1.6269	-2.6024	11.5907	-3.2854	5.8174	5.81	3.2325		720.9	0.29914	0.26631	0.16715	0.11018	0.03248	0.01135	-0.01544	0.10593	0.20168												720.9	0.287931	0.253149	0.148938	0.10936	0.0378509	0.0103508	-0.0222148	0.0678018	0.208293
723	-0.449	-4.7288	-1.6113	-2.5597	11.6011	-3.313	5.8304	5.7893	3.2261		723	0.30919	0.22651	0.18192	0.15304	0.04406	-0.01606	-0.00214	0.08407	0.19448												723	0.297981	0.213349	0.163708	0.15222	0.0494309	-0.0170592	-0.00891478	0.0459418	0.201093
725.1	-0.449	-4.8188	-1.6085	-2.5359	11.5733	-3.3268	5.8565	5.8269	3.2377		725.1	0.31104	0.1367	0.18389	0.17701	0.01743	-0.02967	0.02425	0.12052	0.20529												725.1	0.299831	0.123539	0.165678	0.17619	0.0228009	-0.0306692	0.0174752	0.0823918	0.211903
727.2	-0.4435	-4.8621	-1.5872	-2.5739	11.5559	-3.2854	5.7848	5.8306	3.2583		727.2	0.31839	0.0936	0.20437	0.13917	0.00121	0.01192	-0.04715	0.12307	0.2251												727.2	0.307181	0.0804395	0.186158	0.13835	0.00658094	0.0109208	-0.0539248	0.0849418	0.231713
729.3	-0.4545	-4.7521	-1.5986	-2.5727	11.5315	-3.2751	5.8337	5.8524	3.2274		729.3	0.30924	0.2038	0.19214	0.14054	-0.02202	0.02241	0.00205	0.14371	0.19341												729.3	0.298031	0.190639	0.173928	0.13972	-0.0166491	0.0214108	-0.00472478	0.105582	0.200023
731.4	-0.4777	-4.7521	-1.5872	-2.5727	11.6534	-3.1889	5.9379	5.8281	3.2287		731.4	0.28789	0.204	0.20271	0.1407	0.10106	0.1088	0.10654	0.11826	0.19391												731.4	0.276681	0.190839	0.184498	0.13988	0.106431	0.107801	0.0997652	0.0801318	0.200523
733.5	-0.4942	-4.7388	-1.5731	-2.5822	11.6778	-3.2406	5.8727	5.7772	3.2222		733.5	0.27324	0.21749	0.21598	0.13136	0.12663	0.05729	0.04164	0.06621	0.18662												733.5	0.262031	0.204329	0.197768	0.13054	0.132001	0.0562908	0.0348652	0.0280818	0.193233
735.6	-0.4408	-4.7222	-1.5816	-2.5775	11.6952	-3.2578	5.8825	5.7833	3.2287		735.6	0.32849	0.23429	0.20666	0.13623	0.14521	0.04028	0.05174	0.07115	0.19233												735.6	0.317281	0.221129	0.188448	0.13541	0.150581	0.0392808	0.0449652	0.0330218	0.198943
737.7	-0.4367	-4.7588	-1.5391	-2.5799	11.622	-3.2475	5.8239	5.8257	3.2415		737.7	0.33444	0.19789	0.24833	0.13399	0.07318	0.05077	-0.00657	0.1124	0.20434												737.7	0.323231	0.184729	0.230118	0.13317	0.0785509	0.0497708	-0.0133448	0.0742718	0.210953
739.8	-0.4846	-4.7022	-1.5362	-2.5799	11.5872	-3.3578	5.9086	5.8366	3.2222		739.8	0.28839	0.25469	0.2504	0.13416	0.03956	-0.05934	0.07843	0.12215	0.18425												739.8	0.277181	0.241529	0.232188	0.13334	0.0449309	-0.0603392	0.0716552	0.0840218	0.190863
741.9	-0.4736	-4.7188	-1.4937	-2.6143	11.6116	-3.3337	5.889	5.8342	3.239		741.9	0.30124	0.23828	0.29207	0.09992	0.06514	-0.03505	0.05913	0.11859	0.20025												741.9	0.290031	0.225119	0.273858	0.0990996	0.0705109	-0.0360492	0.0523552	0.0804618	0.206863
744	-0.4339	-4.6922	-1.4909	-2.587	11.5907	-3.282	5.8434	5.8124	3.2235		744	0.3428	0.26508	0.29405	0.12739	0.04541	0.01684	0.01382	0.09564	0.18396												744	0.331591	0.251919	0.275838	0.12657	0.0507809	0.0158408	0.00704522	0.0575118	0.190573
746.1	-0.4394	-4.7055	-1.583	-2.568	11.6186	-3.2613	5.8858	5.7966	3.2197		746.1	0.33915	0.25198	0.20112	0.14655	0.07449	0.03773	0.05652	0.07868	0.17937												746.1	0.327941	0.238819	0.182908	0.14573	0.0798609	0.0367308	0.0497452	0.0405518	0.185983
748.2	-0.4449	-4.7088	-1.5603	-2.568	11.6395	-3.2613	5.9086	5.8427	3.2248		748.2	0.3355	0.24888	0.22299	0.14671	0.09656	0.03792	0.07962	0.12363	0.18368												748.2	0.324291	0.235719	0.204778	0.14589	0.101931	0.0369208	0.0728452	0.0855018	0.190293
750.3	-0.4709	-4.6788	-1.549	-2.5811	11.636	-3.282	5.889	5.7942	3.2608		750.3	0.31135	0.27907	0.23346	0.13378	0.09424	0.01741	0.06031	0.07398	0.21888												750.3	0.300141	0.265909	0.215248	0.13296	0.0996109	0.0164108	0.0535352	0.0358518	0.225493
752.4	-0.4558	-4.6955	-1.5461	-2.5989	11.6882	-3.213	5.8858	5.7905	3.239		752.4	0.3283	0.26257	0.23554	0.11614	0.14761	0.0866	0.05741	0.06912	0.19629												752.4	0.317091	0.249409	0.217328	0.11532	0.152981	0.0856008	0.0506352	0.0309918	0.202903
754.5	-0.438	-4.7088	-1.5887	-2.5668	11.737	-3.2027	5.8499	5.7942	3.2299		754.5	0.34795	0.24947	0.19211	0.14841	0.19759	0.09709	0.02181	0.07167	0.1864												754.5	0.336741	0.236309	0.173898	0.14759	0.202961	0.0960908	0.0150352	0.0335418	0.193013
756.6	-0.4873	-4.7555	-1.5702	-2.5787	11.6882	-3.2199	5.7881	5.8306	3.2518		756.6	0.3005	0.20297	0.20978	0.13667	0.14996	0.08008	-0.03969	0.10692	0.20751												756.6	0.289291	0.189809	0.191568	0.13585	0.155331	0.0790808	-0.0464648	0.0687918	0.214123
758.7	-0.4531	-4.7288	-1.5745	-2.5894	11.6743	-3.1613	5.8239	5.8415	3.2287		758.7	0.33655	0.22986	0.20465	0.12614	0.13724	0.13887	-0.0036	0.11666	0.18362												758.7	0.325341	0.216699	0.186438	0.12532	0.142611	0.137871	-0.0103748	0.0785318	0.190233
760.8	-0.4613	-4.6155	-1.5518	-2.5953	11.6116	-3.2268	5.8793	5.8524	3.2287		760.8	0.3302	0.34336	0.22653	0.1204	0.07572	0.07356	0.0521	0.12641	0.18282												760.8	0.318991	0.330199	0.208318	0.11958	0.0810909	0.0725608	0.0453252	0.0882818	0.189433
762.9	-0.4901	-4.7355	-1.5518	-2.6108	11.6673	-3.3612	5.8499	5.8281	3.239		762.9	0.30325	0.22356	0.2257	0.10506	0.13259	-0.06065	0.023	0.10096	0.19233												762.9	0.292041	0.210399	0.207488	0.10424	0.137961	-0.0616492	0.0162252	0.0628318	0.198943
765	-0.4969	-4.8055	-1.5731	-2.6024	11.6499	-3.3302	5.8402	5.8221	3.2428		765	0.2983	0.15376	0.20357	0.11363	0.11637	-0.02946	0.01359	0.0938	0.19534												765	0.287091	0.140599	0.185358	0.11281	0.121741	-0.0304592	0.00681522	0.0556718	0.201953
767.1	-0.4832	-4.7388	-1.5603	-2.5668	11.5489	-3.3819	5.8499	5.8366	3.2428		767.1	0.31385	0.22065	0.21554	0.14939	0.01654	-0.08098	0.02359	0.10715	0.19455												767.1	0.302641	0.207489	0.197328	0.14857	0.0219109	-0.0819792	0.0168152	0.0690218	0.201163
769.2	-0.4928	-4.6922	-1.5986	-2.5882	11.6325	-3.3164	5.8532	5.8633	3.2235		769.2	0.3061	0.26745	0.17642	0.12816	0.10132	-0.01529	0.02719	0.1327	0.17445												769.2	0.294891	0.254289	0.158208	0.12734	0.106691	-0.0162892	0.0204152	0.0945718	0.181063
771.3	-0.4983	-4.7022	-1.5348	-2.6013	11.6186	-3.3612	5.8955	5.8209	3.239		771.3	0.30245	0.25765	0.23939	0.11522	0.08859	-0.0599	0.06978	0.08914	0.18916												771.3	0.291241	0.244489	0.221178	0.1144	0.0939609	-0.0608992	0.0630052	0.0510118	0.195773
773.4	-0.4846	-4.7455	-1.5008	-2.5941	11.6673	-3.344	5.8011	5.8124	3.2338		773.4	0.318	0.21455	0.27256	0.12259	0.13847	-0.04251	-0.02432	0.07949	0.18317												773.4	0.306791	0.201389	0.254348	0.12177	0.143841	-0.0435092	-0.0310948	0.0413618	0.189783
775.5	-0.4901	-4.7188	-1.5277	-2.5656	11.5733	-3.2888	5.8206	5.8524	3.2647		775.5	0.31435	0.24144	0.24483	0.15125	0.04564	0.01288	-0.00452	0.11834	0.21328												775.5	0.303141	0.228279	0.226618	0.15043	0.0510109	0.0118808	-0.0112948	0.0802118	0.219893
777.6	-0.4955	-4.7088	-1.5206	-2.5941	11.629	-3.3061	5.8369	5.8827	3.2595		777.6	0.3108	0.25164	0.25111	0.12291	0.10252	-0.00423	0.01207	0.14748	0.20729												777.6	0.299591	0.238479	0.232898	0.12209	0.107891	-0.00522917	0.00529522	0.109352	0.213903
779.7	-0.4928	-4.7188	-1.5476	-2.5929	11.6325	-3.2992	5.9021	5.8548	3.2235		779.7	0.31535	0.24184	0.22328	0.12428	0.1072	0.00286	0.07757	0.11843	0.17049												779.7	0.304141	0.228679	0.205068	0.12346	0.112571	0.00186083	0.0707952	0.0803018	0.177103
781.8	-0.5626	-4.6588	-1.5972	-2.6072	11.7335	-3.2268	6.0096	5.8233	3.2222		781.8	0.2474	0.30204	0.17285	0.11014	0.20937	0.07545	0.18537	0.08578	0.1684												781.8	0.236191	0.288879	0.154638	0.10932	0.214741	0.0744508	0.178595	0.0476518	0.175013
783.9	-0.5722	-4.7155	-1.6553	-2.6262	11.737	-3.2992	6.0096	5.8184	3.2261		783.9	0.23965	0.24553	0.11392	0.09131	0.21405	0.00324	0.18566	0.07972	0.17151												783.9	0.228441	0.232369	0.0957082	0.0904896	0.219421	0.00224083	0.178885	0.0415918	0.178123
786	-0.553	-4.7688	-1.7375	-2.6167	11.7265	-3.2957	5.9574	5.8209	3.2235		786	0.2607	0.19243	0.0309	0.10097	0.20472	0.00693	0.13376	0.08107	0.16812												786	0.249491	0.179269	0.0126882	0.10015	0.210091	0.00593083	0.126985	0.0429418	0.174733
788.1	-0.5476	-4.7321	-1.7247	-2.6191	11.7161	-3.2061	5.9412	5.8415	3.2248		788.1	0.26795	0.22933	0.04287	0.09874	0.1955	0.09672	0.11786	0.10051	0.16862												788.1	0.256741	0.216169	0.0246582	0.0979196	0.200871	0.0957208	0.111085	0.0623818	0.175233
790.2	-0.6105	-4.6988	-1.7148	-2.6381	11.6778	-3.2337	5.8467	5.8366	3.1913		790.2	0.2069	0.26283	0.05194	0.0799	0.15837	0.06931	0.02365	0.09446	0.13433												790.2	0.195691	0.249669	0.0337282	0.0790796	0.163741	0.0683108	0.0168752	0.0563318	0.140943
792.3	-0.6146	-4.7755	-1.7446	-2.6226	11.6673	-3.2199	5.876	5.8269	3.2106		792.3	0.20465	0.18632	0.02131	0.09556	0.14905	0.0833	0.05325	0.08361	0.15284												792.3	0.193441	0.173159	0.00309823	0.0947396	0.154421	0.0823008	0.0464752	0.0454818	0.159453
794.4	-0.6215	-4.8355	-1.7531	-2.6274	11.6186	-3.2992	5.9672	5.8294	3.1798		794.4	0.1996	0.12652	0.01199	0.09093	0.10152	0.00419	0.14475	0.08495	0.12125												794.4	0.188391	0.113359	-0.00622177	0.0901096	0.106891	0.00319083	0.137975	0.0468218	0.127863
796.5	-0.6092	-4.8588	-1.7516	-2.625	11.6255	-3.3164	5.9281	5.8306	3.1514		796.5	0.21375	0.10342	0.01266	0.09349	0.1096	-0.01282	0.10594	0.085	0.09206												796.5	0.202541	0.0902595	-0.00555177	0.0926696	0.114971	-0.0138192	0.0991652	0.0468718	0.0986726
798.6	-0.6228	-4.7821	-1.7587	-2.6417	11.5802	-3.3543	5.8499	5.8221	3.1682		798.6	0.202	0.18032	0.00473	0.07696	0.06548	-0.05053	0.02804	0.07535	0.10806												798.6	0.190791	0.167159	-0.0134818	0.0761396	0.0708509	-0.0515292	0.0212652	0.0372218	0.114673
800.7	-0.6338	-4.8654	-1.7502	-2.6619	11.636	-3.3819	5.863	5.8075	3.1733		800.7	0.19285	0.09721	0.0124	0.05692	0.12245	-0.07794	0.04144	0.05959	0.11237												800.7	0.181641	0.0840495	-0.00581177	0.0560996	0.127821	-0.0789392	0.0346652	0.0214618	0.118983
802.8	-0.6721	-4.9521	-1.7545	-2.6631	11.629	-3.3992	5.7913	5.7954	3.172		802.8	0.1564	0.01071	0.00728	0.05589	0.11663	-0.09505	-0.02997	0.04634	0.11028												802.8	0.145191	-0.00245051	-0.0109318	0.0550696	0.122001	-0.0960492	-0.0367448	0.00821179	0.116893
804.9	-0.6885	-4.9354	-1.8055	-2.6737	11.6987	-3.3578	5.7783	5.8002	3.1579		804.9	0.14185	0.02761	-0.04455	0.04545	0.1875	-0.05346	-0.04267	0.04999	0.09539												804.9	0.130641	0.0144495	-0.0627618	0.0446296	0.192871	-0.0544592	-0.0494448	0.0118618	0.102003
807	-0.7009	-4.8888	-1.814	-2.6726	11.5663	-3.3819	5.8337	5.8051	3.1733		807	0.13131	0.07441	-0.05388	0.04672	0.05628	-0.07737	0.01303	0.05373	0.10999												807	0.120101	0.0612495	-0.0720918	0.0458996	0.0616509	-0.0783692	0.00625522	0.0156018	0.116603
809.1	-0.7474	-4.8121	-1.8041	-2.6642	11.5907	-3.4336	5.8239	5.8124	3.1785		809.1	0.08666	0.1513	-0.04481	0.05528	0.08185	-0.12888	0.00352	0.05988	0.1144												809.1	0.0754506	0.138139	-0.0630218	0.0544596	0.0872209	-0.129879	-0.00325478	0.0217518	0.121013
811.2	-0.7146	-4.7988	-1.7927	-2.7023	11.6151	-3.4026	5.8467	5.8015	3.181		811.2	0.12131	0.1648	-0.03423	0.01734	0.10743	-0.09769	0.02662	0.04783	0.11611												811.2	0.110101	0.151639	-0.0524418	0.0165196	0.112801	-0.0986892	0.0198452	0.00970179	0.122723
813.3	-0.7406	-4.8621	-1.7942	-2.6749	11.5802	-3.4198	5.8727	5.8197	3.172		813.3	0.09716	0.1017	-0.03656	0.04491	0.0737	-0.1147	0.05292	0.06487	0.10632												813.3	0.0859506	0.0885395	-0.0547718	0.0440896	0.0790709	-0.115699	0.0461452	0.0267418	0.112933
815.4	-0.72	-4.9354	-1.8282	-2.6702	11.5663	-3.3371	5.7653	5.8415	3.1772		815.4	0.11961	0.0286	-0.07139	0.04977	0.06098	-0.03181	-0.05419	0.08552	0.11073												815.4	0.108401	0.0154395	-0.0896018	0.0489496	0.0663509	-0.0328092	-0.0609648	0.0473918	0.117343
817.5	-0.7187	-4.9021	-1.8395	-2.6476	11.5385	-3.3785	5.7815	5.8221	3.1785		817.5	0.12276	0.06209	-0.08352	0.07254	0.03435	-0.07303	-0.03769	0.06497	0.11123												817.5	0.111551	0.0489295	-0.101732	0.0717196	0.0397209	-0.0740292	-0.0444648	0.0268418	0.117843
819.6	-0.7501	-4.9154	-1.8083	-2.7046	11.5176	-3.3406	5.8337	5.833	3.1733		819.6	0.09321	0.04899	-0.05314	0.0157	0.01463	-0.03494	0.01481	0.07471	0.10524												819.6	0.0820006	0.0358295	-0.0713518	0.0148796	0.0200009	-0.0359392	0.00803522	0.0365818	0.111853
821.7	-0.7406	-4.9121	-1.8154	-2.7177	11.535	-3.313	5.8565	5.8184	3.1682		821.7	0.10456	0.05249	-0.06107	0.00277	0.03321	-0.00715	0.0379	0.05896	0.09935												821.7	0.0933506	0.0393295	-0.0792818	0.00194963	0.0385809	-0.00814917	0.0311252	0.0208318	0.105963
823.8	-0.7597	-4.9254	-1.8211	-2.6714	11.6011	-3.3647	5.8499	5.8172	3.1309		823.8	0.08731	0.03939	-0.0676	0.04923	0.10048	-0.05866	0.0316	0.05661	0.06126												823.8	0.0761006	0.0262295	-0.0858118	0.0484096	0.105851	-0.0596592	0.0248252	0.0184818	0.0678726
825.9	-0.783	-5.0021	-1.8027	-2.6761	11.6046	-3.3543	5.9053	5.8294	3.1219		825.9	0.06586	-0.03712	-0.05003	0.04469	0.10516	-0.04807	0.0873	0.06765	0.05146												825.9	0.0546506	-0.0502805	-0.0682418	0.0438696	0.110531	-0.0490692	0.0805252	0.0295218	0.0580726
828	-0.7515	-4.9088	-1.8197	-2.6797	11.6081	-3.2785	5.8369	5.8682	3.1077		828	0.09921	0.05638	-0.06785	0.04126	0.10983	0.02792	0.01919	0.1053	0.03647												828	0.0880006	0.0432195	-0.0860618	0.0404396	0.115201	0.0269208	0.0124152	0.0671718	0.0430826
830.1	-0.7652	-4.8954	-1.7757	-2.6975	11.6464	-3.3061	5.7815	5.8439	3.1373		830.1	0.08736	0.06998	-0.02468	0.02362	0.14931	0.000512473	-0.03591	0.07984	0.06528												830.1	0.0761506	0.0568195	-0.0428918	0.0227996	0.154681	-0.000486701	-0.0426848	0.0417118	0.0718926
832.2	-0.7981	-4.8321	-1.797	-2.688	11.6708	-3.2682	5.7327	5.8002	3.1128		832.2	0.05631	0.13348	-0.04681	0.03329	0.17488	0.0386	-0.08441	0.03499	0.03999												832.2	0.0451006	0.120319	-0.0650218	0.0324696	0.180251	0.0376008	-0.0911848	-0.00313821	0.0466026
834.3	-0.7762	-4.9354	-1.8112	-2.6844	11.6325	-3.3337	5.6903	5.8342	3.1347		834.3	0.08006	0.03037	-0.06184	0.03705	0.13776	-0.02671	-0.12652	0.06784	0.0611												834.3	0.0688506	0.0172095	-0.0800518	0.0362296	0.143131	-0.0277092	-0.133295	0.0297118	0.0677126
836.4	-0.7666	-4.8888	-1.8012	-2.6868	11.5768	-3.2957	5.661	5.8742	3.1463		836.4	0.09151	0.07717	-0.05266	0.03482	0.08323	0.01148	-0.15552	0.10668	0.0719												836.4	0.0803006	0.0640095	-0.0708718	0.0339996	0.0886009	0.0104808	-0.162295	0.0685518	0.0785126
838.5	-0.7721	-4.8688	-1.8225	-2.7141	11.5315	-3.313	5.7066	5.8463	3.1424		838.5	0.08786	0.09737	-0.07479	0.00768	0.03911	-0.00563	-0.10962	0.07763	0.06721												838.5	0.0766506	0.0842095	-0.0930018	0.00685963	0.0444809	-0.00662917	-0.116395	0.0395018	0.0738226
840.6	-0.7994	-4.9188	-1.8083	-2.7498	11.5071	-3.313	5.7066	5.8645	3.1514		840.6	0.06241	0.04757	-0.06142	-0.02786	0.01589	-0.00544	-0.10933	0.09468	0.07542												840.6	0.0512006	0.0344095	-0.0796318	-0.0286804	0.0212609	-0.00643917	-0.116105	0.0565518	0.0820326
842.7	-0.8063	-4.9254	-1.797	-2.7237	11.4827	-3.2682	5.7913	5.8221	3.1424		842.7	0.05736	0.04116	-0.05095	-0.00159	-0.00734	0.03955	-0.02433	0.05112	0.06563												842.7	0.0461506	0.0279995	-0.0691618	-0.00241037	-0.00196906	0.0385508	-0.0311048	0.0129918	0.0722426
844.8	-0.7693	-4.9454	-1.8197	-2.6702	11.4514	-3.2647	5.7815	5.8391	3.1219		844.8	0.09621	0.02136	-0.07447	0.05207	-0.03746	0.04324	-0.03383	0.06697	0.04433												844.8	0.0850006	0.00819949	-0.0926818	0.0512496	-0.0320891	0.0422408	-0.0406048	0.0288418	0.0509426
846.9	-0.794	-4.8921	-1.8353	-2.6737	11.4375	-3.2647	5.7555	5.85	3.136		846.9	0.07336	0.07486	-0.0909	0.04874	-0.05019	0.04343	-0.05954	0.07672	0.05764												846.9	0.0621506	0.0616995	-0.109112	0.0479196	-0.0448191	0.0424308	-0.0663148	0.0385918	0.0642526
849	-0.7885	-4.8688	-1.8097	-2.7118	11.4166	-3.2785	5.8402	5.8791	3.1566		849	0.08071	0.09836	-0.06613	0.0108	-0.06991	0.02982	0.02546	0.10466	0.07745												849	0.0695006	0.0851995	-0.0843418	0.00997963	-0.0645391	0.0288208	0.0186852	0.0665318	0.0840626
851.1	-0.8008	-4.9154	-1.8097	-2.7415	11.5071	-3.2544	5.762	5.85	3.154		851.1	0.07026	0.05195	-0.06696	-0.01873	0.02176	0.05411	-0.05244	0.07441	0.07406												851.1	0.0590506	0.0387895	-0.0851718	-0.0195504	0.0271309	0.0531108	-0.0592148	0.0362818	0.0806726
853.2	-0.8323	-4.9154	-1.8097	-2.7094	11.5001	-3.2475	5.7653	5.8548	3.145		853.2	0.04061	0.05215	-0.06778	0.01353	0.01594	0.0612	-0.04885	0.07806	0.06427												853.2	0.0294006	0.0389895	-0.0859918	0.0127096	0.0213109	0.0602008	-0.0556248	0.0399318	0.0708826
855.3	-0.82	-4.9354	-1.8027	-2.7141	11.5176	-3.1958	5.8109	5.85	3.1553		855.3	0.05476	0.03235	-0.06161	0.00899	0.03461	0.11309	-0.00295	0.0721	0.07377												855.3	0.0435506	0.0191895	-0.0798218	0.00816963	0.0399809	0.112091	-0.00972478	0.0339718	0.0803826
857.4	-0.8008	-4.9788	-1.8069	-2.6844	11.5315	-3.2233	5.8174	5.8585	3.1437		857.4	0.07581	-0.01085	-0.06664	0.03886	0.04969	0.08578	0.00385	0.07945	0.06138												857.4	0.0646006	-0.0240105	-0.0848518	0.0380396	0.0550609	0.0847808	-0.00292478	0.0413218	0.0679926
859.5	-0.8159	-4.8821	-1.8012	-2.7106	11.5036	-3.2233	5.7848	5.8645	3.1244		859.5	0.06256	0.08604	-0.06177	0.01282	0.02297	0.08597	-0.02845	0.0843	0.04129												859.5	0.0513506	0.0728795	-0.0799818	0.0119996	0.0283409	0.0849708	-0.0352248	0.0461718	0.0479026
861.6	-0.8117	-4.8455	-1.7857	-2.7118	11.5001	-3.282	5.7131	5.8427	3.1502		861.6	0.06861	0.12284	-0.04709	0.01179	0.02064	0.02746	-0.09986	0.06134	0.0663												861.6	0.0574006	0.109679	-0.0653018	0.0109696	0.0260109	0.0264608	-0.106635	0.0232118	0.0729126
863.7	-0.8295	-4.9354	-1.7842	-2.6999	11.5036	-3.282	5.7425	5.7918	3.1347		863.7	0.05266	0.03314	-0.04642	0.02385	0.02532	0.02765	-0.07016	0.00929	0.05												863.7	0.0414506	0.0199795	-0.0646318	0.0230296	0.0306909	0.0266508	-0.0769348	-0.0288382	0.0566126
865.8	-0.8104	-4.9854	-1.8282	-2.6844	11.4827	-3.2888	5.775	5.8075	3.1476		865.8	0.07361	-0.01666	-0.09125	0.03952	0.00559	0.02104	-0.03736	0.02384	0.06211												865.8	0.0624006	-0.0298205	-0.109462	0.0386996	0.0109609	0.0200408	-0.0441348	-0.0142882	0.0687226
867.9	-0.8172	-4.9688	-1.8353	-2.6809	11.5245	-3.2785	5.7587	5.8657	3.163		867.9	0.06866	0.000133352	-0.09918	0.04318	0.04857	0.03152	-0.05337	0.08088	0.07672												867.9	0.0574506	-0.0130272	-0.117392	0.0423596	0.0539409	0.0305208	-0.0601448	0.0427518	0.0833326
870	-0.8241	-4.8555	-1.7942	-2.7248	11.5385	-3.3061	5.7946	5.8294	3.1527		870	0.06362	0.11363	-0.0589	-0.000555531	0.06374	0.00411	-0.01717	0.04343	0.06563												870	0.0524106	0.100469	-0.0771118	-0.0013759	0.0691109	0.00311083	-0.0239448	0.00530179	0.0722426
872.1	-0.8172	-4.9054	-1.8012	-2.7141	11.5106	-3.2578	5.6969	5.8281	3.1592		872.1	0.07237	0.06393	-0.06673	0.01031	0.03702	0.0526	-0.11457	0.04097	0.07134												872.1	0.0611606	0.0507695	-0.0849418	0.00948963	0.0423909	0.0516008	-0.121345	0.00284179	0.0779526
874.2	-0.8733	-4.9754	-1.8055	-2.7189	11.5942	-3.2751	5.7131	5.7893	3.1566		874.2	0.01812	-0.00587	-0.07186	0.00567	0.12179	0.03549	-0.09808	0.00102	0.06794												874.2	0.00691059	-0.0190305	-0.0900718	0.00484963	0.127161	0.0344908	-0.104855	-0.0371082	0.0745526
876.3	-0.8419	-4.9854	-1.7786	-2.7094	11.4862	-3.2406	5.7262	5.8087	3.1424		876.3	0.05137	-0.01568	-0.04579	0.01534	0.01497	0.07018	-0.08468	0.01927	0.05295												876.3	0.0401606	-0.0288405	-0.0640018	0.0145196	0.0203409	0.0691808	-0.0914548	-0.0188582	0.0595626
878.4	-0.8432	-4.9788	-1.8367	-2.7546	11.4409	-3.2233	5.7881	5.8366	3.1682		878.4	0.05192	-0.00888	-0.10471	-0.0297	-0.02915	0.08767	-0.02248	0.04601	0.07796												878.4	0.0407106	-0.0220405	-0.122922	-0.0305204	-0.0237791	0.0866708	-0.0292548	0.00788179	0.0845726
880.5	-0.8172	-4.9721	-1.7672	-2.7462	11.5141	-3.2027	5.8369	5.8221	3.154		880.5	0.07977	-0.00198	-0.03604	-0.02113	0.04522	0.10846	0.02661	0.03036	0.06297												880.5	0.0685606	-0.0151405	-0.0542518	-0.0219504	0.0505909	0.107461	0.0198352	-0.00776821	0.0695826
882.6	-0.8638	-4.9354	-1.7176	-2.7462	11.5036	-3.2027	5.8109	5.8257	3.1527		882.6	0.03502	0.03492	0.01273	-0.02097	0.0359	0.10865	0.00090919	0.03281	0.06087												882.6	0.0238106	0.0217595	-0.00548177	-0.0217904	0.0412709	0.107651	-0.00586559	-0.00531821	0.0674826
884.7	-0.8446	-4.9954	-1.7219	-2.7094	11.5559	-3.2785	5.775	5.8087	3.1553		884.7	0.05607	-0.02489	0.0076	0.01599	0.08937	0.03304	-0.03469	0.01465	0.06268												884.7	0.0448606	-0.0380505	-0.0106118	0.0151696	0.0947409	0.0320408	-0.0414648	-0.0234782	0.0692926
886.8	-0.8254	-4.9654	-1.7828	-2.7201	11.5176	-3.282	5.7262	5.8209	3.1746		886.8	0.07712	0.00531	-0.05413	0.00546	0.05225	0.02973	-0.0832	0.0257	0.08119												886.8	0.0659106	-0.00785051	-0.0723418	0.00463963	0.0576209	0.0287308	-0.0899748	-0.0124282	0.0878026
888.9	-0.872	-4.9154	-1.7701	-2.7213	11.4653	-3.2544	5.8043	5.8221	3.1913		888.9	0.03237	0.05551	-0.04225	0.00442	0.00112	0.05752	-0.0048	0.02575	0.0971												888.9	0.0211606	0.0423495	-0.0604618	0.00359963	0.00649094	0.0565208	-0.0115748	-0.0123782	0.103713
891	-0.8802	-4.9754	-1.7587	-2.751	11.5907	-3.2406	5.8239	5.85	3.1952		891	0.02602	-0.00429	-0.03168	-0.02511	0.1277	0.07151	0.0151	0.05249	0.10021												891	0.0148106	-0.0174505	-0.0498918	-0.0259304	0.133071	0.0705108	0.00832522	0.0143618	0.106823
893.1	-0.8829	-4.9688	-1.746	-2.7367	11.6116	-3.2957	5.8043	5.8391	3.1913		893.1	0.02517	0.0025	-0.01981	-0.01065	0.14977	0.0166	-0.00421	0.04044	0.09551												893.1	0.0139606	-0.0106605	-0.0380218	-0.0114704	0.155141	0.0156008	-0.0109848	0.00231179	0.102123
895.2	-0.8761	-5.0321	-1.7616	-2.7296	11.4758	-3.3268	5.7555	5.8548	3.1772		895.2	0.03382	-0.0606	-0.03624	-0.00338	0.01515	-0.01431	-0.05271	0.05499	0.08062												895.2	0.0226106	-0.0737605	-0.0544518	-0.00420037	0.0205209	-0.0153092	-0.0594848	0.0168618	0.0872326
897.3	-0.887	-5.0687	-1.7828	-2.7415	11.4723	-3.2199	5.8793	5.8318	3.1695		897.3	0.02477	-0.097	-0.05826	-0.01512	0.01282	0.09278	0.07139	0.03083	0.07213												897.3	0.0135606	-0.110161	-0.0764718	-0.0159404	0.0181909	0.0917808	0.0646152	-0.00729821	0.0787426
899.4	-0.8638	-4.9621	-1.7913	-2.7522	11.4792	-3.2199	5.8988	5.856	3.1708		899.4	0.04982	0.0098	-0.06759	-0.02566	0.0209	0.09297	0.09118	0.05388	0.07264												899.4	0.0386106	-0.00336051	-0.0858018	-0.0264804	0.0262709	0.0919708	0.0844052	0.0157518	0.0792526
901.5	-0.8898	-4.9721	-1.7672	-2.7676	11.5106	-3.2578	5.8337	5.8463	3.1579		901.5	0.02567	-6.86075e-06	-0.04432	-0.04089	0.05348	0.05526	0.02638	0.04303	0.05894												901.5	0.0144606	-0.0131674	-0.0625318	-0.0417104	0.0588509	0.0542608	0.0196052	0.00490179	0.0655526
903.6	-0.8747	-5.0287	-1.7871	-2.7676	11.4827	-3.1923	5.8304	5.8318	3.172		903.6	0.04262	-0.05641	-0.06505	-0.04073	0.02675	0.12095	0.02338	0.02737	0.07225												903.6	0.0314106	-0.0695705	-0.0832618	-0.0415504	0.0321209	0.119951	0.0166052	-0.0107582	0.0788626
905.7	-0.9158	-5.1054	-1.7715	-2.7593	11.4375	-3.1889	5.762	5.8318	3.1901		905.7	0.00337	-0.13291	-0.05027	-0.03226	-0.01727	0.12454	-0.04473	0.02622	0.08956												905.7	-0.00783941	-0.146071	-0.0684818	-0.0330804	-0.0118991	0.123541	-0.0515048	-0.0119082	0.0961726
907.8	-0.8816	-5.0454	-1.7842	-2.7546	11.4131	-3.244	5.8239	5.8621	3.1798		907.8	0.03942	-0.07271	-0.0638	-0.0274	-0.0405	0.06963	0.01747	0.05537	0.07847												907.8	0.0282106	-0.0858705	-0.0820118	-0.0282204	-0.0351291	0.0686308	0.0106952	0.0172418	0.0850826
909.9	-0.9062	-4.9788	-1.7587	-2.7652	11.5176	-3.2406	5.8141	5.856	3.1656		909.9	0.01667	-0.00592	-0.03913	-0.03783	0.06518	0.07322	0.00797	0.04811	0.06348												909.9	0.00546059	-0.0190805	-0.0573418	-0.0386504	0.0705509	0.0722208	0.00119522	0.00998179	0.0700926
912	-0.9172	-5.0287	-1.7346	-2.745	11.5419	-3.2647	5.7946	5.8791	3.1617		912	0.00752	-0.05562	-0.01586	-0.01747	0.09065	0.04931	-0.01124	0.07006	0.05878												912	-0.00368941	-0.0687805	-0.0340718	-0.0182904	0.0960209	0.0483108	-0.0180148	0.0319318	0.0653926
914.1	-0.9541	-5.0654	-1.695	-2.7605	11.5001	-3.3095	5.889	5.8742	3.1643		914.1	-0.02753	-0.09212	0.02292	-0.0328	0.05003	0.0047	0.08346	0.064	0.06059												914.1	-0.0387394	-0.105281	0.00470823	-0.0336204	0.0554009	0.00370083	0.0766852	0.0258718	0.0672026
916.2	-0.9172	-5.1587	-1.746	-2.7593	11.535	-3.3199	5.7913	5.8585	3.1669		916.2	0.01122	-0.18522	-0.02891	-0.03144	0.0861	-0.00551	-0.01394	0.04715	0.0624												916.2	1.05914e-05	-0.198381	-0.0471218	-0.0322604	0.0914709	-0.00650917	-0.0207148	0.00902179	0.0690126
918.3	-0.9199	-5.0321	-1.7757	-2.7355	11.4792	-3.2578	5.863	5.8827	3.1849		918.3	0.01037	-0.05843	-0.05944	-0.00748	0.03148	0.05677	0.05805	0.0702	0.07961												918.3	-0.000839409	-0.0715905	-0.0776518	-0.00830037	0.0368509	0.0557708	0.0512752	0.0320718	0.0862226
920.4	-0.9254	-5.0454	-1.763	-2.7771	11.5176	-3.2475	5.8076	5.8378	3.1733		920.4	0.00672	-0.07153	-0.04757	-0.04891	0.07106	0.06726	0.00295	0.02414	0.06721												920.4	-0.00448941	-0.0846905	-0.0657818	-0.0497304	0.0764309	0.0662608	-0.00382478	-0.0139882	0.0738226
922.5	-0.9486	-5.0254	-1.7885	-2.7795	11.521	-3.2888	5.8239	5.8633	3.2016		922.5	-0.01463	-0.05133	-0.07389	-0.05115	0.07563	0.02615	0.01955	0.04849	0.09472												922.5	-0.0258394	-0.0644905	-0.0921018	-0.0519704	0.0810009	0.0251508	0.0127752	0.0103618	0.101333
924.6	-0.9377	-5.0087	-1.7899	-2.7641	11.5141	-3.282	5.7555	5.8706	3.1991		924.6	-0.00188	-0.03443	-0.07612	-0.03558	0.06991	0.03314	-0.04856	0.05464	0.09143												924.6	-0.0130894	-0.0475905	-0.0943318	-0.0364004	0.0752809	0.0321408	-0.0553348	0.0165118	0.0980426
926.7	-0.9185	-5.0287	-1.7857	-2.7878	11.5001	-3.1544	5.8271	5.873	3.2016		926.7	0.01917	-0.05424	-0.07275	-0.05912	0.05708	0.16093	0.02334	0.05588	0.09314												926.7	0.00796059	-0.0674005	-0.0909618	-0.0599404	0.0624509	0.159931	0.0165652	0.0177518	0.0997526
928.8	-0.9213	-5.0154	-1.7913	-2.77	11.4444	-3.2302	5.7913	5.8766	3.2003		928.8	0.01822	-0.04074	-0.07918	-0.04115	0.00256	0.08532	-0.01216	0.05833	0.09105												928.8	0.00701059	-0.0539005	-0.0973918	-0.0419704	0.00793094	0.0843208	-0.0189348	0.0202018	0.0976626
930.9	-0.9596	-4.9188	-1.7474	-2.8068	11.434	-3.2406	5.7881	5.8706	3.154		930.9	-0.01823	0.05606	-0.0361	-0.07779	-0.00667	0.07511	-0.01507	0.05118	0.04395												930.9	-0.0294394	0.0428995	-0.0543118	-0.0786104	-0.00129906	0.0741108	-0.0218448	0.0130518	0.0505626
933	-0.9432	-5.0221	-1.7559	-2.7961	11.4235	-3.2751	5.863	5.8403	3.1888		933	2.50322e-05	-0.04704	-0.04543	-0.06693	-0.01599	0.0408	0.06013	0.01972	0.07796												933	-0.0111844	-0.0602005	-0.0636418	-0.0677504	-0.0106191	0.0398008	0.0533552	-0.0184082	0.0845726
935.1	-0.961	-4.9921	-1.7885	-2.7652	11.4549	-3.2957	5.8467	5.8548	3.1926		935.1	-0.01592	-0.01685	-0.07886	-0.03586	0.01658	0.02039	0.04413	0.03307	0.08097												935.1	-0.0271294	-0.0300105	-0.0970718	-0.0366804	0.0219509	0.0193908	0.0373552	-0.00505821	0.0875826
937.2	-0.9363	-4.9821	-1.7984	-2.7652	11.4444	-3.244	5.7783	5.8706	3.1952		937.2	0.01063	-0.00665	-0.08959	-0.0357	0.00726	0.07228	-0.02398	0.04772	0.08278												937.2	-0.000579409	-0.0198105	-0.107802	-0.0365204	0.0126309	0.0712808	-0.0307548	0.00959179	0.0893926
939.3	-0.9678	-4.9721	-1.746	-2.7403	11.4792	-3.2406	5.8043	5.8512	3.1913		939.3	-0.01902	0.00355	-0.03801	-0.01063	0.04324	0.07587	0.00232	0.02716	0.07808												939.3	-0.0302294	-0.00961051	-0.0562218	-0.0114504	0.0486109	0.0748708	-0.00445478	-0.0109682	0.0846926
941.4	-0.9719	-4.9821	-1.7049	-2.7676	11.4758	-3.313	5.7718	5.8621	3.1965		941.4	-0.02127	-0.00625	0.00226	-0.03777	0.04101	0.00366	-0.02988	0.03691	0.08249												941.4	-0.0324794	-0.0194105	-0.0159518	-0.0385904	0.0463809	0.00266083	-0.0366548	-0.00121821	0.0891026
943.5	-0.9486	-5.0187	-1.7261	-2.7462	11.4967	-3.2854	5.7848	5.8572	3.2119		943.5	0.00388	-0.04266	-0.01977	-0.0162	0.06309	0.03145	-0.01659	0.03086	0.0971												943.5	-0.00732941	-0.0558205	-0.0379818	-0.0170204	0.0684609	0.0304508	-0.0233648	-0.00726821	0.103713
945.6	-0.9076	-5.0221	-1.7318	-2.7082	11.4967	-3.3233	5.7848	5.8682	3.181		945.6	0.04673	-0.04586	-0.0263	0.02196	0.06426	-0.00626	-0.01629	0.0407	0.06541												945.6	0.0355206	-0.0590205	-0.0445118	0.0211396	0.0696309	-0.00725917	-0.0230648	0.00257179	0.0720226
947.7	-0.887	-5.0021	-1.7658	-2.7296	11.5001	-3.313	5.8043	5.8718	3.2184		947.7	0.06918	-0.02566	-0.06112	0.000724065	0.06884	0.00423	0.00351	0.04315	0.10202												947.7	0.0579706	-0.0388205	-0.0793318	-9.63014e-05	0.0742109	0.00323083	-0.00326478	0.00502179	0.108633
949.8	-0.9308	-5.0821	-1.7772	-2.7474	11.528	-3.3612	5.7913	5.8985	3.2235		949.8	0.02723	-0.10546	-0.07335	-0.01691	0.09791	-0.04378	-0.0092	0.0687	0.10632												949.8	0.0160206	-0.118621	-0.0915618	-0.0177304	0.103281	-0.0447792	-0.0159748	0.0305718	0.112933
951.9	-0.9391	-5.0987	-1.7417	-2.7581	11.4827	-3.3095	5.775	5.9009	3.2222		951.9	0.02078	-0.12187	-0.03868	-0.02745	0.05379	0.00811	-0.0252	0.06994	0.10423												951.9	0.00957059	-0.135031	-0.0568918	-0.0282704	0.0591609	0.00711083	-0.0319748	0.0318118	0.110843
954	-0.9801	-5.1554	-1.7403	-2.7546	11.5176	-3.2957	5.775	5.8694	3.2299		954	-0.01837	-0.17837	-0.03811	-0.02378	0.08986	0.0221	-0.0249	0.03729	0.11114												954	-0.0295794	-0.191531	-0.0563218	-0.0246004	0.0952309	0.0211008	-0.0316748	-0.000838211	0.117753
956.1	-0.9637	-5.0987	-1.8012	-2.7415	11.4862	-3.2406	5.8011	5.8851	3.2016		956.1	-0.000121335	-0.12147	-0.09983	-0.01052	0.05964	0.07739	0.00149	0.05183	0.08205												956.1	-0.0113307	-0.134631	-0.118042	-0.0113404	0.0650109	0.0763908	-0.00528478	0.0137018	0.0886626
958.2	-0.9829	-5.1154	-1.7913	-2.7522	11.4932	-3.3647	5.775	5.9094	3.181		958.2	-0.01747	-0.13797	-0.09076	-0.02105	0.06782	-0.04652	-0.02431	0.07498	0.06065												958.2	-0.0286794	-0.151131	-0.108972	-0.0218704	0.0731909	-0.0475192	-0.0310848	0.0368518	0.0672626
960.3	-1.013	-5.0587	-1.7601	-2.7546	11.42	-3.3543	5.749	5.9142	3.1617		960.3	-0.04572	-0.08108	-0.06039	-0.02329	-0.00421	-0.03593	-0.05001	0.07863	0.04056												960.3	-0.0569294	-0.0942405	-0.0786018	-0.0241104	0.00116094	-0.0369292	-0.0567848	0.0405018	0.0471726
962.4	-0.9979	-5.0454	-1.7105	-2.7546	11.3713	-3.3543	5.775	5.9203	3.1772		962.4	-0.02877	-0.06758	-0.01162	-0.02313	-0.05173	-0.03574	-0.02371	0.08357	0.05527												962.4	-0.0399794	-0.0807405	-0.0298318	-0.0239504	-0.0463591	-0.0367392	-0.0304848	0.0454418	0.0618826
964.5	-0.9952	-5.0487	-1.7105	-2.7189	11.3434	-3.3061	5.7587	5.8585	3.1965		964.5	-0.02422	-0.07068	-0.01244	0.01274	-0.07846	0.01265	-0.03972	0.02062	0.07378												964.5	-0.0354294	-0.0838405	-0.0306518	0.0119196	-0.0730891	0.0116508	-0.0464948	-0.0175082	0.0803926
966.6	-1.0007	-5.0621	-1.7304	-2.7415	11.3573	-3.3026	5.7848	5.8536	3.1759		966.6	-0.02787	-0.08388	-0.03317	-0.0097	-0.06338	0.01634	-0.01332	0.01457	0.05239												966.6	-0.0390794	-0.0970405	-0.0513818	-0.0105204	-0.0580091	0.0153408	-0.0200948	-0.0235582	0.0590026
968.7	-0.9596	-5.1287	-1.7063	-2.7248	11.3748	-3.3612	5.8043	5.8682	3.1888		968.7	0.01508	-0.15029	-0.0099	0.00717	-0.04471	-0.04208	0.00648	0.02801	0.06449												968.7	0.00387059	-0.163451	-0.0281118	0.00634963	-0.0393391	-0.0430792	-0.000294776	-0.0101182	0.0711026
970.8	-0.9664	-5.1154	-1.7148	-2.7569	11.3852	-3.4061	5.8109	5.8451	3.1463		970.8	0.01013	-0.13679	-0.01923	-0.02477	-0.03313	-0.08679	0.01337	0.00376	0.0212												970.8	-0.00107941	-0.149951	-0.0374418	-0.0255904	-0.0277591	-0.0877892	0.00659522	-0.0343682	0.0278126
972.9	-0.9993	-5.1121	-1.7006	-2.7415	11.3887	-3.3268	5.7978	5.8427	3.1849		972.9	-0.02092	-0.13329	-0.00585	-0.0092	-0.02846	-0.0073	0.000568821	0.000206975	0.05901												972.9	-0.0321294	-0.146451	-0.0240618	-0.0100204	-0.0230891	-0.00829917	-0.00620596	-0.0379212	0.0656226
975	-0.9651	-5.1654	-1.7105	-2.7284	11.4479	-3.2544	5.7653	5.8439	3.1759		975	0.01513	-0.18639	-0.01658	0.00406	0.03192	0.06529	-0.03163	0.000253475	0.04922												975	0.00392059	-0.199551	-0.0347918	0.00323963	0.0372909	0.0642908	-0.0384048	-0.0378747	0.0558326
977.1	-0.9254	-5.0421	-1.7375	-2.7415	11.3887	-3.2923	5.8565	5.8851	3.1901		977.1	0.05668	-0.0629	-0.04441	-0.00888	-0.02611	0.02758	0.05986	0.0403	0.06262												977.1	0.0454706	-0.0760605	-0.0626218	-0.00970037	-0.0207391	0.0265808	0.0530852	0.00217179	0.0692326
979.2	-0.9445	-5.0687	-1.7205	-2.7344	11.42	-3.2682	5.8109	5.8888	3.1643		979.2	0.03943	-0.0893	-0.02824	-0.00161	0.00637	0.05187	0.01456	0.04285	0.03603												979.2	0.0282206	-0.102461	-0.0464518	-0.00243037	0.0117409	0.0508708	0.00778522	0.00472179	0.0426426
981.3	-0.9568	-4.9987	-1.7233	-2.7629	11.3887	-3.2027	5.7359	5.9082	3.1695		981.3	0.02898	-0.0191	-0.03186	-0.02995	-0.02375	0.11756	-0.06014	0.06109	0.04044												981.3	0.0177706	-0.0322605	-0.0500718	-0.0307704	-0.0183791	0.116561	-0.0669148	0.0229618	0.0470526
983.4	-0.9514	-5.0687	-1.7134	-2.7344	11.4479	-3.1958	5.6806	5.9058	3.1669		983.4	0.03623	-0.0889	-0.02279	-0.00128	0.03662	0.12465	-0.11515	0.05754	0.03705												983.4	0.0250206	-0.102061	-0.0410018	-0.00210037	0.0419909	0.123651	-0.121925	0.0194118	0.0436626
985.5	-0.9774	-5.0587	-1.78	-2.726	11.4131	-3.2509	5.7783	5.9094	3.1605		985.5	0.01208	-0.07871	-0.09022	0.00728	0.003	0.06974	-0.01715	0.05999	0.02986												985.5	0.000870591	-0.0918705	-0.108432	0.00645963	0.00837094	0.0687408	-0.0239248	0.0218618	0.0364726
987.6	-0.9527	-5.0187	-1.7984	-2.7248	11.4026	-3.2716	5.8304	5.9385	3.1708		987.6	0.03863	-0.03851	-0.10945	0.00865	-0.00633	0.04923	0.03525	0.08793	0.03936												987.6	0.0274206	-0.0516705	-0.127662	0.00782963	-0.000959056	0.0482308	0.0284752	0.0498018	0.0459726
989.7	-0.9637	-5.1121	-1.746	-2.7474	11.4026	-3.2165	5.8402	5.8815	3.1952		989.7	0.02948	-0.13171	-0.05787	-0.01379	-0.00515	0.10452	0.04534	0.02978	0.06297												989.7	0.0182706	-0.144871	-0.0760818	-0.0146104	0.000220944	0.103521	0.0385652	-0.00834821	0.0695826
991.8	-0.976	-5.0621	-1.719	-2.7641	11.4723	-3.2923	5.8141	5.8827	3.1772		991.8	0.01903	-0.08151	-0.0317	-0.03033	0.06572	0.02891	0.01954	0.02983	0.04418												991.8	0.00782059	-0.0946705	-0.0499118	-0.0311504	0.0710909	0.0279108	0.0127652	-0.00829821	0.0507926
993.9	-0.9829	-5.0654	-1.702	-2.7664	11.4792	-3.2647	5.8662	5.8961	3.1669		993.9	0.01398	-0.08462	-0.01553	-0.03246	0.0738	0.0567	0.07194	0.04207	0.03309												993.9	0.00277059	-0.0977805	-0.0337418	-0.0332804	0.0791709	0.0557008	0.0651652	0.00394179	0.0397026
996	-0.961	-5.1021	-1.6921	-2.7522	11.3678	-3.1854	5.8499	5.9142	3.1862		996	0.03773	-0.12112	-0.00646	-0.0181	-0.03643	0.13619	0.05593	0.05902	0.05159												996	0.0265206	-0.134281	-0.0246718	-0.0189204	-0.0310591	0.135191	0.0491552	0.0208918	0.0582026
998.1	-0.987	-5.0787	-1.7148	-2.7177	11.3678	-3.1889	5.9086	5.8936	3.1952		998.1	0.01359	-0.09752	-0.02998	0.01657	-0.03525	0.13288	0.11493	0.03726	0.0598												998.1	0.00238059	-0.110681	-0.0481918	0.0157496	-0.0298791	0.131881	0.108155	-0.000868211	0.0664126
1000.2	-0.9815	-4.9821	-1.6836	-2.7201	11.3991	-3.2337	5.8402	5.8791	3.2248		1000.2	0.02094	-0.000724986	0.00038855	0.01433	-0.00277	0.08827	0.04683	0.02161	0.08861												1000.2	0.00973059	-0.0138855	-0.0178232	0.0135096	0.00260094	0.0872708	0.0400552	-0.0165182	0.0952226
1002.3	-0.9924	-5.0121	-1.6496	-2.7546	11.4061	-3.2268	5.7718	5.8779	3.2132		1002.3	0.01189	-0.03053	0.03356	-0.02	0.0054	0.09536	-0.02128	0.01926	0.07622												1002.3	0.000680591	-0.0436905	0.0153482	-0.0208204	0.0107709	0.0943608	-0.0280548	-0.0188682	0.0828326
1004.4	-1.0157	-5.0021	-1.6595	-2.7498	11.3957	-3.244	5.8043	5.8657	3.2042		1004.4	-0.00956	-0.02033	0.02283	-0.01504	-0.00382	0.07835	0.01152	0.0059	0.06643												1004.4	-0.0207694	-0.0334905	0.00461823	-0.0158604	0.00155094	0.0773508	0.00474522	-0.0322282	0.0730426
1006.5	-0.9993	-5.0021	-1.6893	-2.7462	11.4166	-3.2406	5.8011	5.8839	3.2261		1006.5	0.00869	-0.02013	-0.00779	-0.01128	0.01825	0.08194	0.00862	0.02295	0.08753												1006.5	-0.00251941	-0.0332905	-0.0260018	-0.0121004	0.0236209	0.0809408	0.00184522	-0.0151782	0.0941426
1008.6	-0.9815	-4.9488	-1.7134	-2.7474	11.4723	-3.3406	5.7913	5.9058	3.2402		1008.6	0.02834	0.03336	-0.03272	-0.01231	0.07513	-0.01787	-0.000886674	0.0437	0.10084												1008.6	0.0171306	0.0201995	-0.0509318	-0.0131304	0.0805009	-0.0188692	-0.00766145	0.00557179	0.107453
1010.7	-0.9719	-4.9721	-1.7006	-2.7688	11.4688	-3.3061	5.7946	5.8985	3.2364		1010.7	0.03979	0.01026	-0.02075	-0.03355	0.0728	0.01682	0.00271	0.03524	0.09625												1010.7	0.0285806	-0.00290051	-0.0389618	-0.0343704	0.0781709	0.0158208	-0.00406478	-0.00288821	0.102863
1012.8	-0.9965	-5.0487	-1.7375	-2.7344	11.4688	-3.3854	5.7359	5.8948	3.239		1012.8	0.01704	-0.06614	-0.05848	0.00102	0.07398	-0.06229	-0.05569	0.03039	0.09806												1012.8	0.00583059	-0.0793005	-0.0766918	0.000199634	0.0793509	-0.0632892	-0.0624648	-0.00773821	0.104673
1014.9	-1.0171	-5.0021	-1.7516	-2.7046	11.434	-3.3406	5.7783	5.9009	3.2132		1014.9	-0.00171	-0.01934	-0.0734	0.03098	0.04035	-0.0173	-0.013	0.03534	0.07146												1014.9	-0.0129194	-0.0325005	-0.0916118	0.0301596	0.0457209	-0.0182992	-0.0197748	-0.00278821	0.0780726
1017	-1.0075	-5.0221	-1.7545	-2.7082	11.3573	-3.3406	5.7946	5.93	3.1862		1017	0.00974	-0.03915	-0.07713	0.02755	-0.03517	-0.01711	0.0036	0.06328	0.04367												1017	-0.00146941	-0.0523105	-0.0953418	0.0267296	-0.0297991	-0.0181092	-0.00317478	0.0251518	0.0502826
1019.1	-0.9746	-5.0187	-1.7275	-2.7213	11.3608	-3.3647	5.8141	5.9336	3.2081		1019.1	0.04449	-0.03555	-0.05096	0.01461	-0.03049	-0.04103	0.0234	0.06573	0.06478												1019.1	0.0332806	-0.0487105	-0.0691718	0.0137896	-0.0251191	-0.0420292	0.0166252	0.0276018	0.0713926
1021.2	-0.9965	-4.9854	-1.712	-2.7201	11.3748	-3.3302	5.7392	5.9652	3.2248		1021.2	0.02444	-0.00205	-0.03629	0.01598	-0.01532	-0.00634	-0.05121	0.09618	0.08069												1021.2	0.0132306	-0.0152105	-0.0545018	0.0151596	-0.00994906	-0.00733917	-0.0579848	0.0580518	0.0873026
1023.3	-0.9911	-5.0721	-1.6964	-2.7427	11.319	-3.2854	5.6969	5.9433	3.2287		1023.3	0.03169	-0.08855	-0.02151	-0.00646	-0.06994	0.03865	-0.09321	0.07312	0.0838												1023.3	0.0204806	-0.101711	-0.0397218	-0.00728037	-0.0645691	0.0376508	-0.0999848	0.0349918	0.0904126
1025.4	-0.9801	-5.1254	-1.6808	-2.732	11.3922	-3.3509	5.7001	5.9518	3.2222		1025.4	0.04454	-0.14166	-0.00674	0.0044	0.00443	-0.02666	-0.08971	0.08047	0.0765												1025.4	0.0333306	-0.154821	-0.0249518	0.00357963	0.00980094	-0.0276592	-0.0964848	0.0423418	0.0831126
1027.5	-1.0143	-5.1254	-1.6964	-2.7189	11.3434	-3.3199	5.7197	5.9349	3.2299		1027.5	0.01219	-0.14146	-0.02317	0.01767	-0.04319	0.00453	-0.06982	0.06242	0.08341												1027.5	0.000980591	-0.154621	-0.0413818	0.0168496	-0.0378191	0.00353083	-0.0765948	0.0242918	0.0900226
1029.6	-1.0075	-5.0287	-1.6666	-2.7272	11.2842	-3.3957	5.7587	5.9094	3.2248		1029.6	0.02084	-0.04456	0.0058	0.00953	-0.10122	-0.07108	-0.03052	0.03576	0.07752												1029.6	0.00963059	-0.0577205	-0.0124118	0.00870963	-0.0958491	-0.0720792	-0.0372948	-0.00236821	0.0841326
1031.7	-1.028	-5.0621	-1.6539	-2.732	11.3922	-3.4474	5.6871	5.9239	3.2338		1031.7	0.00219	-0.07776	0.01768	0.0049	0.00796	-0.12259	-0.10182	0.04911	0.08573												1031.7	-0.00901941	-0.0909205	-0.000531771	0.00407963	0.0133309	-0.123589	-0.108595	0.0109818	0.0923426
1033.8	-0.9979	-5.0554	-1.6624	-2.7237	11.4096	-3.413	5.762	5.9179	3.2261		1033.8	0.03414	-0.07087	0.00835	0.01336	0.02653	-0.088	-0.02663	0.04196	0.07723												1033.8	0.0229306	-0.0840305	-0.00986177	0.0125396	0.0319009	-0.0889992	-0.0334048	0.00383179	0.0838426
1035.9	-1.0034	-4.9821	-1.6567	-2.7141	11.3608	-3.3371	5.7587	5.9288	3.1965		1035.9	0.03049	0.00263	0.01322	0.02313	-0.02109	-0.01191	-0.02963	0.0517	0.04684												1035.9	0.0192806	-0.0105305	-0.00499177	0.0223096	-0.0157191	-0.0129092	-0.0364048	0.0135718	0.0534526
1038	-0.976	-5.0321	-1.6865	-2.726	11.4583	-3.3612	5.7457	5.93	3.2003		1038	0.05974	-0.04717	-0.01741	0.01139	0.07759	-0.03582	-0.04233	0.05175	0.04985												1038	0.0485306	-0.0603305	-0.0356218	0.0105696	0.0829609	-0.0368192	-0.0491048	0.0136218	0.0564626
1040.1	-1.0198	-4.9921	-1.7063	-2.7462	11.4653	-3.313	5.6675	5.9179	3.2003		1040.1	0.01779	-0.00697	-0.03803	-0.00865	0.08576	0.01257	-0.12024	0.03849	0.04906												1040.1	0.00658059	-0.0201305	-0.0562418	-0.00947037	0.0911309	0.0115708	-0.127015	0.000361789	0.0556726
1042.2	-1.0746	-5.0354	-1.6865	-2.7569	11.4305	-3.3302	5.7359	5.9421	3.2068		1042.2	-0.03516	-0.05008	-0.01906	-0.01918	0.05214	-0.00444	-0.05154	0.06154	0.05477												1042.2	-0.0463694	-0.0632405	-0.0372718	-0.0200004	0.0575109	-0.00543917	-0.0583148	0.0234118	0.0613826
1044.3	-1.0404	-5.0387	-1.7233	-2.7332	11.4723	-3.3095	5.7327	5.9276	3.1952		1044.3	0.000892538	-0.05318	-0.05669	0.00468	0.09511	0.01645	-0.05444	0.04589	0.04237												1044.3	-0.0103169	-0.0663405	-0.0749018	0.00385963	0.100481	0.0154508	-0.0612148	0.00776179	0.0489826
1046.4	-1.0157	-5.0387	-1.6794	-2.732	11.3748	-3.3612	5.8174	5.947	3.2106		1046.4	0.02744	-0.05298	-0.01362	0.00605	-0.00121	-0.03506	0.03055	0.06413	0.05698												1046.4	0.0162306	-0.0661405	-0.0318318	0.00522963	0.00416094	-0.0360592	0.0237752	0.0260018	0.0635926
1048.5	-1.0335	-5.0321	-1.6907	-2.7486	11.3573	-3.3509	5.8337	5.9276	3.2402		1048.5	0.01149	-0.04618	-0.02574	-0.01039	-0.01754	-0.02457	0.04715	0.04358	0.08579												1048.5	0.000280591	-0.0593405	-0.0439518	-0.0112104	-0.0121691	-0.0255692	0.0403752	0.00545179	0.0924026
1050.6	-1.054	-5.0354	-1.6609	-2.732	11.3713	-3.4509	5.8304	5.9385	3.2377		1050.6	-0.00716	-0.04929	0.00323	0.00638	-0.00236	-0.12438	0.04415	0.05333	0.0825												1050.6	-0.0183694	-0.0624505	-0.0149818	0.00555963	0.00301094	-0.125379	0.0373752	0.0152018	0.0891126
1052.7	-1.039	-5.1054	-1.6283	-2.7284	11.4723	-3.3716	5.7522	5.8997	3.2042		1052.7	0.00969	-0.11909	0.035	0.01014	0.09981	-0.04489	-0.03376	0.01337	0.0482												1052.7	-0.00151941	-0.132251	0.0167882	0.00931963	0.105181	-0.0458892	-0.0405348	-0.0247582	0.0548126
1054.8	-1.0595	-5.1021	-1.6326	-2.7011	11.4166	-3.4061	5.6773	5.913	3.2016		1054.8	-0.00896	-0.11559	0.02987	0.0376	0.04529	-0.0792	-0.10836	0.02552	0.04481												1054.8	-0.0201694	-0.128751	0.0116582	0.0367796	0.0506609	-0.0801992	-0.115135	-0.0126082	0.0514226
1056.9	-1.0417	-5.1054	-1.6298	-2.713	11.2981	-3.4164	5.6773	5.9276	3.1965		1056.9	0.01069	-0.11869	0.03185	0.02587	-0.07204	-0.08931	-0.10806	0.03897	0.03892												1056.9	-0.000519409	-0.131851	0.0136382	0.0250496	-0.0666691	-0.0903092	-0.114835	0.000841789	0.0455326
1059	-1.0184	-5.0121	-1.6397	-2.7082	11.2772	-3.3681	5.7359	5.9288	3.2042		1059	0.03584	-0.0252	0.02112	0.03083	-0.09176	-0.04082	-0.04917	0.03901	0.04583												1059	0.0246306	-0.0383605	0.00290823	0.0300096	-0.0863891	-0.0418192	-0.0559448	0.000881789	0.0524426
1061.1	-1.0595	-5.0587	-1.6113	-2.7094	11.3434	-3.3233	5.7294	5.8888	3.2029		1061.1	-0.0034	-0.0716	0.04869	0.0298	-0.02438	0.00417	-0.05537	-0.00214	0.04374												1061.1	-0.0146094	-0.0847605	0.0304782	0.0289796	-0.0190091	0.00317083	-0.0621448	-0.0402682	0.0503526
1063.2	-1.0787	-5.0254	-1.6439	-2.732	11.4061	-3.3337	5.7522	5.9312	3.2158		1063.2	-0.02075	-0.0381	0.01526	0.00736	0.03949	-0.00604	-0.03227	0.03911	0.05584												1063.2	-0.0319594	-0.0512605	-0.00295177	0.00653963	0.0448609	-0.00703917	-0.0390448	0.000981789	0.0624526
1065.3	-1.0376	-4.9888	-1.6666	-2.7225	11.3957	-3.3716	5.7425	5.9276	3.2016		1065.3	0.0222	-0.0013	-0.00826	0.01703	0.03027	-0.04375	-0.04167	0.03435	0.04085												1065.3	0.0109906	-0.0144605	-0.0264718	0.0162096	0.0356409	-0.0447492	-0.0484448	-0.00377821	0.0474626
1067.4	-1.0404	-5.0021	-1.6921	-2.726	11.4096	-3.3199	5.7229	5.93	3.1836		1067.4	0.02125	-0.01441	-0.03459	0.01369	0.04534	0.00814	-0.06098	0.0356	0.02206												1067.4	0.0100406	-0.0275705	-0.0528018	0.0128696	0.0507109	0.00714083	-0.0677548	-0.00252821	0.0286726
1069.5	-1.0417	-4.9521	-1.6737	-2.726	11.4688	-3.313	5.6741	5.9518	3.2042		1069.5	0.0218	0.03579	-0.01702	0.01385	0.10572	0.01522	-0.10948	0.05625	0.04187												1069.5	0.0105906	0.0226295	-0.0352318	0.0130296	0.111091	0.0142208	-0.116255	0.0181218	0.0484826
1071.6	-1.0349	-5.0354	-1.6893	-2.7367	11.4061	-3.3509	5.6643	5.9518	3.2055		1071.6	0.03045	-0.04731	-0.03345	0.00332	0.04419	-0.02249	-0.11898	0.05509	0.04237												1071.6	0.0192406	-0.0604705	-0.0516618	0.00249963	0.0495609	-0.0234892	-0.125755	0.0169618	0.0489826
1073.7	-1.0335	-5.0754	-1.6779	-2.7379	11.4409	-3.4405	5.6252	5.9215	3.2016		1073.7	0.0337	-0.08711	-0.02287	0.00228	0.08017	-0.1119	-0.15779	0.02364	0.03768												1073.7	0.0224906	-0.100271	-0.0410818	0.00145963	0.0855409	-0.112899	-0.164565	-0.0144882	0.0442926
1075.8	-1.0445	-5.1387	-1.6666	-2.7296	11.326	-3.4612	5.6578	5.9409	3.2274		1075.8	0.02455	-0.15022	-0.0124	0.01075	-0.03356	-0.13241	-0.12489	0.04189	0.06269												1075.8	0.0133406	-0.163381	-0.0306118	0.00992963	-0.0281891	-0.133409	-0.131665	0.00376179	0.0693026
1077.9	-1.0431	-5.0854	-1.651	-2.7344	11.3051	-3.3578	5.7262	5.9688	3.1939		1077.9	0.0278	-0.09672	0.00237	0.00611	-0.05328	-0.02882	-0.05619	0.06863	0.0284												1077.9	0.0165906	-0.109881	-0.0158418	0.00528963	-0.0479091	-0.0298192	-0.0629648	0.0305018	0.0350126
1080	-1.0376	-5.132	-1.5958	-2.751	11.333	-3.3923	5.6838	5.9676	3.2274		1080	0.03515	-0.14312	0.05674	-0.01032	-0.0242	-0.06313	-0.0983	0.06628	0.06111												1080	0.0239406	-0.156281	0.0385282	-0.0111404	-0.0188291	-0.0641292	-0.105075	0.0281518	0.0677226
1082.1	-1.0513	-5.1221	-1.5617	-2.77	11.3225	-3.3509	5.6187	5.9627	3.2222		1082.1	0.0233	-0.13302	0.09002	-0.02916	-0.03353	-0.02154	-0.1631	0.06022	0.05511												1082.1	0.0120906	-0.146181	0.0718082	-0.0299804	-0.0281591	-0.0225392	-0.169875	0.0220918	0.0617226
1084.2	-1.0636	-5.132	-1.583	-2.7557	11.2738	-3.3612	5.762	5.9433	3.2274		1084.2	0.01285	-0.14273	0.06789	-0.0147	-0.08105	-0.03165	-0.0195	0.03967	0.05952												1084.2	0.00164059	-0.155891	0.0496782	-0.0155204	-0.0756791	-0.0326492	-0.0262748	0.00154179	0.0661326
1086.3	-1.0184	-5.0354	-1.6156	-2.7676	11.3399	-3.3199	5.8369	5.9361	3.2377		1086.3	0.0599	-0.04593	0.03446	-0.02643	-0.01378	0.00984	0.05569	0.03132	0.06903												1086.3	0.0486906	-0.0590905	0.0162482	-0.0272504	-0.00840906	0.00884083	0.0489152	-0.00680821	0.0756426
1088.4	-1.0116	-5.0487	-1.6368	-2.7534	11.3121	-3.3061	5.7425	5.9385	3.2492		1088.4	0.06855	-0.05903	0.01243	-0.01207	-0.0404	0.02383	-0.03841	0.03256	0.07974												1088.4	0.0573406	-0.0721905	-0.00578177	-0.0128904	-0.0350291	0.0228308	-0.0451848	-0.00556821	0.0863526
1090.5	-1.039	-5.0221	-1.5632	-2.7462	11.3016	-3.3026	5.7522	5.9603	3.2776		1090.5	0.043	-0.03223	0.0852	-0.0047	-0.04973	0.02752	-0.02841	0.05321	0.10734												1090.5	0.0317906	-0.0453905	0.0669882	-0.00552037	-0.0443591	0.0265208	-0.0351848	0.0150818	0.113953
1092.6	-1.0554	-5.0054	-1.5858	-2.7617	11.3573	-3.3647	5.7718	5.9312	3.2776		1092.6	0.02845	-0.01534	0.06178	-0.02004	0.00715	-0.03439	-0.00852	0.02296	0.10655												1092.6	0.0172406	-0.0285005	0.0435682	-0.0208604	0.0125209	-0.0353892	-0.0152948	-0.0151682	0.113163
1094.7	-1.0431	-5.0621	-1.6085	-2.7474	11.4026	-3.4061	5.8076	5.9579	3.2608		1094.7	0.0426	-0.07184	0.03825	-0.00557	0.05362	-0.0756	0.02758	0.0485	0.08896												1094.7	0.0313906	-0.0850005	0.0200382	-0.00639037	0.0589909	-0.0765992	0.0208052	0.0103718	0.0955726
1096.8	-1.0362	-5.0221	-1.6312	-2.7593	11.319	-3.3371	5.7327	5.9543	3.2299		1096.8	0.05135	-0.03164	0.01472	-0.01731	-0.0288	-0.00641	-0.04702	0.04375	0.05727												1096.8	0.0401406	-0.0448005	-0.00349177	-0.0181304	-0.0234291	-0.00740917	-0.0537948	0.00562179	0.0638826
1098.9	-1.0445	-4.9788	-1.6638	-2.7676	11.3713	-3.2957	5.7718	5.9664	3.2209		1098.9	0.0449	0.01186	-0.01871	-0.02545	0.02468	0.03518	-0.00763	0.0547	0.04748												1098.9	0.0336906	-0.00130051	-0.0369218	-0.0262704	0.0300509	0.0341808	-0.0144048	0.0165718	0.0540926
1101	-1.0623	-5.0087	-1.6368	-2.7641	11.3643	-3.3406	5.7392	5.9579	3.2261		1101	0.02895	-0.01785	0.00747	-0.02178	0.01885	-0.00953	-0.03993	0.04504	0.05188												1101	0.0177406	-0.0310105	-0.0107418	-0.0226004	0.0242209	-0.0105292	-0.0467048	0.00691179	0.0584926
1103.1	-1.0691	-5.0687	-1.6539	-2.7272	11.3399	-3.4095	5.8141	5.9555	3.2209		1103.1	0.024	-0.07765	-0.01046	0.01528	-0.00437	-0.07824	0.03527	0.04149	0.04589												1103.1	0.0127906	-0.0908105	-0.0286718	0.0144596	0.00100094	-0.0792392	0.0284952	0.00336179	0.0525026
1105.2	-1.0732	-5.0254	-1.6397	-2.6892	11.4061	-3.4095	5.8434	5.9518	3.2158		1105.2	0.02175	-0.03415	0.00291	0.05345	0.063	-0.07805	0.06486	0.03664	0.04												1105.2	0.0105406	-0.0473105	-0.0153018	0.0526296	0.0683709	-0.0790492	0.0580852	-0.00148821	0.0466126
1107.3	-1.0677	-4.9888	-1.6227	-2.7153	11.3295	-3.3164	5.7946	5.9737	3.2454		1107.3	0.0291	0.00265	0.01908	0.02751	-0.01242	0.01524	0.01636	0.05738	0.06881												1107.3	0.0178906	-0.0105105	0.000868229	0.0266896	-0.00704906	0.0142408	0.00958522	0.0192518	0.0754226
1109.4	-1.0664	-5.0054	-1.6439	-2.7355	11.232	-3.3854	5.7848	5.9603	3.2364		1109.4	0.03225	-0.01376	-0.00294	0.00748	-0.10875	-0.05357	0.00686	0.04283	0.05901												1109.4	0.0210406	-0.0269205	-0.0211518	0.00665963	-0.103379	-0.0545692	8.52239e-05	0.00470179	0.0656226
1111.5	-1.0855	-4.9621	-1.6368	-2.7332	11.3051	-3.3371	5.775	5.9785	3.2454		1111.5	0.015	0.02974	0.00333	0.00994	-0.03447	-0.00508	-0.00265	0.05988	0.06722												1111.5	0.00379059	0.0165795	-0.0148818	0.00911963	-0.0290991	-0.00607917	-0.00942478	0.0217518	0.0738326
1113.6	-1.1197	-4.9954	-1.6255	-2.707	11.3225	-3.4026	5.7229	5.9688	3.2377		1113.6	-0.01735	-0.00336	0.0138	0.0363	-0.0159	-0.07039	-0.05445	0.04902	0.05873												1113.6	-0.0285594	-0.0165205	-0.00441177	0.0354796	-0.0105291	-0.0713892	-0.0612248	0.0108918	0.0653426
1115.7	-1.091	-5.0321	-1.6071	-2.7141	11.2807	-3.3164	5.7848	5.9361	3.239		1115.7	0.0132	-0.03986	0.03137	0.02937	-0.05652	0.016	0.00775	0.01517	0.05924												1115.7	0.00199059	-0.0530205	0.0131582	0.0285496	-0.0511491	0.0150008	0.000975224	-0.0229582	0.0658526
1117.8	-1.1047	-5.0554	-1.6298	-2.7355	11.2947	-3.4026	5.7946	5.9761	3.2364		1117.8	0.00135	-0.06297	0.00785	0.00813	-0.04134	-0.07001	0.01784	0.05402	0.05585												1117.8	-0.00985941	-0.0761305	-0.0103618	0.00730963	-0.0359691	-0.0710092	0.0110652	0.0158918	0.0624626
1119.9	-1.0978	-4.9754	-1.6113	-2.7344	11.2459	-3.2923	5.7685	5.9749	3.2673		1119.9	0.0101	0.01723	0.02552	0.0094	-0.08897	0.04047	-0.00796	0.05166	0.08595												1119.9	-0.00110941	0.00406949	0.00730823	0.00857963	-0.0835991	0.0394708	-0.0147348	0.0135318	0.0925626
1122	-1.102	-5.0254	-1.566	-2.7629	11.2598	-3.2613	5.7653	5.9664	3.2698		1122	0.00775	-0.03257	0.06999	-0.01894	-0.07389	0.07166	-0.01086	0.04201	0.08766												1122	-0.00345941	-0.0457305	0.0517782	-0.0197604	-0.0685191	0.0706608	-0.0176348	0.00388179	0.0942726
1124.1	-1.0828	-5.0787	-1.6071	-2.7201	11.3086	-3.3164	5.7327	5.9421	3.2621		1124.1	0.02881	-0.08567	0.02806	0.02403	-0.02392	0.01675	-0.04317	0.01655	0.07917												1124.1	0.0176006	-0.0988305	0.00984823	0.0232096	-0.0185491	0.0157508	-0.0499448	-0.0215782	0.0857826
1126.2	-1.0828	-5.0487	-1.6368	-2.7415	11.2703	-3.3164	5.7164	5.9615	3.2724		1126.2	0.03066	-0.05548	-0.00246	0.00279	-0.06104	0.01694	-0.05917	0.0348	0.08868												1126.2	0.0194506	-0.0686405	-0.0206718	0.00196963	-0.0556691	0.0159408	-0.0659448	-0.00332821	0.0952926
1128.3	-1.1061	-4.9521	-1.6383	-2.7308	11.2912	-3.3026	5.7685	5.947	3.2647		1128.3	0.00921	0.04132	-0.00479	0.01366	-0.03897	0.03093	-0.00677	0.01915	0.08018												1128.3	-0.00199941	0.0281595	-0.0230018	0.0128396	-0.0335991	0.0299308	-0.0135448	-0.0189782	0.0867926
1130.4	-1.1266	-5.0287	-1.5816	-2.7498	11.2703	-3.375	5.7815	5.9749	3.2608		1130.4	-0.00944	-0.03508	0.05108	-0.00518	-0.05869	-0.04128	0.00652	0.04589	0.07549												1130.4	-0.0206494	-0.0482405	0.0328682	-0.00600037	-0.0533191	-0.0422792	-0.000254776	0.00776179	0.0821026
1132.5	-1.1239	-5.0321	-1.6142	-2.7795	11.3504	-3.3061	5.7164	5.953	3.2724		1132.5	-0.00489	-0.03828	0.01765	-0.03472	0.02258	0.02781	-0.05828	0.02284	0.0863												1132.5	-0.0160994	-0.0514405	-0.000561771	-0.0355404	0.0279509	0.0268108	-0.0650548	-0.0152882	0.0929126
1134.6	-1.1334	-5.0187	-1.6198	-2.7581	11.319	-3.344	5.7392	5.9761	3.2673		1134.6	-0.01254	-0.02469	0.01123	-0.01315	-0.00764	-0.0099	-0.03518	0.04479	0.08041												1134.6	-0.0237494	-0.0378505	-0.00698177	-0.0139704	-0.00226906	-0.0108992	-0.0419548	0.00666179	0.0870226
1136.7	-1.0992	-4.9987	-1.6184	-2.7498	11.3504	-3.2682	5.7457	5.9931	3.2801		1136.7	0.02351	-0.00449	0.0118	-0.00469	0.02493	0.06609	-0.02839	0.06063	0.09242												1136.7	0.0123006	-0.0176505	-0.00641177	-0.00551037	0.0303009	0.0650908	-0.0351648	0.0225018	0.0990326
1138.8	-1.1197	-5.0654	-1.6184	-2.7439	11.2668	-3.3406	5.8076	5.9688	3.266		1138.8	0.00486	-0.07099	0.01097	0.00138	-0.05749	-0.00612	0.03381	0.03518	0.07752												1138.8	-0.00634941	-0.0841505	-0.00724177	0.000559634	-0.0521191	-0.00711917	0.0270352	-0.00294821	0.0841326
1140.9	-1.1622	-5.0287	-1.6354	-2.77	11.2912	-3.3509	5.8565	5.9555	3.2879		1140.9	-0.03579	-0.03409	-0.00686	-0.02456	-0.03191	-0.01623	0.08301	0.02073	0.09863												1140.9	-0.0469994	-0.0472505	-0.0250718	-0.0253804	-0.0265391	-0.0172292	0.0762352	-0.0173982	0.105243
1143	-1.1293	-5.1254	-1.6609	-2.7367	11.3713	-3.3406	5.8141	5.9688	3.2956		1143	-0.00104	-0.1306	-0.03318	0.00891	0.04936	-0.00574	0.0409	0.03287	0.10554												1143	-0.0122494	-0.143761	-0.0513918	0.00808963	0.0547309	-0.00673917	0.0341252	-0.00525821	0.112153
1145.1	-1.1321	-5.0521	-1.6652	-2.732	11.2355	-3.3819	5.7881	5.9737	3.2454		1145.1	-0.00199	-0.0571	-0.03831	0.01377	-0.08526	-0.04685	0.0152	0.03662	0.05455												1145.1	-0.0131994	-0.0702605	-0.0565218	0.0129496	-0.0798891	-0.0478492	0.00842522	-0.00150821	0.0611626
1147.2	-1.1444	-5.0687	-1.6312	-2.7165	11.2842	-3.413	5.7359	6.0016	3.2428		1147.2	-0.01244	-0.0735	-0.00514	0.02943	-0.03539	-0.07776	-0.0367	0.06337	0.05115												1147.2	-0.0236494	-0.0866605	-0.0233518	0.0286096	-0.0300191	-0.0787592	-0.0434748	0.0252418	0.0577626
1149.3	-1.0978	-5.0621	-1.5929	-2.7569	11.2355	-3.3475	5.7783	5.964	3.2467		1149.3	0.03601	-0.0667	0.03233	-0.0108	-0.08291	-0.01207	0.00599	0.02461	0.05426												1149.3	0.0248006	-0.0798605	0.0141182	-0.0116204	-0.0775391	-0.0130692	-0.000784776	-0.0135182	0.0608726
1151.4	-1.1745	-5.0387	-1.5844	-2.732	11.3573	-3.3992	5.6838	6.004	3.2505		1151.4	-0.03884	-0.04311	0.04001	0.01426	0.04006	-0.06358	-0.08821	0.06346	0.05727												1151.4	-0.0500494	-0.0562705	0.0217982	0.0134396	0.0454309	-0.0645792	-0.0949848	0.0253318	0.0638826
1153.5	-1.1786	-5.0021	-1.6099	-2.7177	11.3678	-3.3371	5.7359	6.004	3.239		1153.5	-0.04109	-0.00631	0.01368	0.02873	0.05174	-0.00129	-0.03581	0.06231	0.04498												1153.5	-0.0522994	-0.0194705	-0.00453177	0.0279096	0.0571109	-0.00228917	-0.0425848	0.0241818	0.0515926
1155.6	-1.143	-4.9888	-1.6213	-2.7058	11.3156	-3.3612	5.7327	5.9931	3.2608		1155.6	-0.00364	0.00719	0.00145	0.04079	0.000714491	-0.0252	-0.03872	0.05025	0.06599												1155.6	-0.0148494	-0.00597051	-0.0167618	0.0399696	0.00608543	-0.0261992	-0.0454948	0.0121218	0.0726026
1157.7	-1.1512	-4.9954	-1.6468	-2.7486	11.3678	-3.3406	5.8174	6.0016	3.2557		1157.7	-0.00999	0.000786516	-0.02488	-0.00184	0.05409	-0.00441	0.04628	0.0576	0.06009												1157.7	-0.0211994	-0.012374	-0.0430918	-0.00266037	0.0594609	-0.00540917	0.0395052	0.0194718	0.0667026
1159.8	-1.1731	-5.0021	-1.6326	-2.7557	11.3156	-3.4509	5.749	5.9797	3.2698		1159.8	-0.03004	-0.00572	-0.0115	-0.00878	0.00307	-0.11452	-0.02182	0.03455	0.0734												1159.8	-0.0412494	-0.0188805	-0.0297118	-0.00960037	0.00844094	-0.115519	-0.0285948	-0.00357821	0.0800126
1161.9	-1.1581	-5.0321	-1.6241	-2.7676	11.3678	-3.3957	5.7946	5.953	3.2943		1161.9	-0.01319	-0.03552	-0.00383	-0.02052	0.05644	-0.05913	0.02408	0.00669	0.09711												1161.9	-0.0243994	-0.0486805	-0.0220418	-0.0213404	0.0618109	-0.0601292	0.0173052	-0.0314382	0.103723
1164	-1.1649	-5.0187	-1.6142	-2.7344	11.3434	-3.4198	5.8076	5.9409	3.2544		1164	-0.01814	-0.02192	0.00524	0.01285	0.03322	-0.08304	0.03737	-0.00656	0.05642												1164	-0.0293494	-0.0350805	-0.0129718	0.0120296	0.0385909	-0.0840392	0.0305952	-0.0446882	0.0630326
1166.1	-1.1581	-5.0187	-1.6085	-2.7118	11.2494	-3.3681	5.7783	5.9688	3.2351		1166.1	-0.00949	-0.02172	0.01011	0.03561	-0.05961	-0.03115	0.00837	0.02018	0.03632												1166.1	-0.0206994	-0.0348805	-0.00810177	0.0347896	-0.0542391	-0.0321492	0.00159522	-0.0179482	0.0429326
[truncated: 110 more rows]
[truncated: 17 more columns]

## Sheet: Fig7D amb timida
		Original data (P700 deltaI/I x10³)							After slope correction in Origin (baseline subtraction tool)									Zero levels							Zero levels set								Maximum at onset of light pulse								Normalized to maximum						Averaged data (shown in Fig. 7D)
[truncated: 762 more rows]
[truncated: 1 more columns]

[truncated: 3 more sheets: Fig7D CO2 timida, Fig7E, Fig7F]
